# Supplementary material for: Molecular Mechanisms of Endometriosis Revealed Using Omics Data
Source: Biomedicines. 2023 Aug 7;11(8):2210. doi: 10.3390/biomedicines11082210 (PMC10452455; doi:10.3390/biomedicines11082210)
Supplement: Supplementary file 1 [file biomedicines-11-02210-s001.zip]

Archive with 16 entries (16 files):
- Supplementary Methods and Results.pdf
- Supplementary Table S1.xlsx
- Supplementary Table S10.xlsx
- Supplementary Table S11.xlsx
- Supplementary Table S12.xlsx
- Supplementary Table S13.xlsx
- Supplementary Table S14.xlsx
- Supplementary Table S15.xlsx
- Supplementary Table S2.xlsx
- Supplementary Table S3.xlsx
- Supplementary Table S4.xlsx
- Supplementary Table S5.xlsx
- Supplementary Table S6.xlsx
- Supplementary Table S7.xlsx
- Supplementary Table S8.xlsx
- Supplementary Table S9.xlsx
