# Supplementary material for: Molecular Mechanisms of Endometriosis Revealed Using Omics Data
Source: Biomedicines. 2023 Aug 7;11(8):2210. doi: 10.3390/biomedicines11082210 (PMC10452455; doi:10.3390/biomedicines11082210)
Supplement: Supplementary file 1 [file biomedicines-11-02210-s001.zip › Supplementary Table S1.xlsx]

## Sheet: Supplementary Table S1
Endometriosis disease genes
IL1A
IL1B
IL1RN
PAEP
SOD2
TP53
EGFR
HK1
ESR1
PGR
HSPD1
FGF2
AR
ENO1
HSPA14
SAG
GSTM1
CYP19A1
CXCL8
IL6
AHSG
IL11
GALT
CCL5
IL10
GSTM2
LPA
CYP2B6
TGFB1
MMP1
HPGDS
HSD17B7
ESR2
CCL2
NME1
HP
NR5A1
SLPI
TIMP2
PLG
CYP4F3
VEGFA
DOK1
PPP1R2C
ITGAV
HOXA10
CYP1B1
NAT2
AHR
LOC110386951
BCL2
GNRHR
TNF
CHST3
CYP1A1
LEFTY2
PPARA
GSTT1
SLCO6A1
HSD17B13
CDKN3
LGALS4
SLC38A1
APOA2
CDKN1B
DHRS11
AHRR
B2M
GSTK1
HSD17B1
NAA16
CA2
MMP14
ARNT
PTN
NOS3
PRL
MTCO2P12
MDK
COX2
VCAM1
IL4
CDKN2A
RBM45
CTNNB1
ICAM1
CDH3
MMP7
LEP
IL1R2
MMP9
ITGB3
HLA-DRB1
MLH1
MMP3
MMP2
CAT
IGF1
TRO
FASLG
H3P10
LHB
MIF
BRD2
LEPR
HSD17B2
THBS1
PTEN
PTGS2
CYP17A1
CDH1
CXCL1
COMT
BRCA2
FGF9
TPT1
HLA-DQB1
PLAU
ERBB2
IL15
IGFBP3
IGFBP1
IFNG
EPO
CXCL10
IL18
NUDT6
CXCL5
PGF
TNFRSF1B
BRCA1
FGF1
EPOR
HLA-DPB1
IL13
MAPK14
MAPK1
SLC6A4
GRAP2
MPO
NR2F2
CCR2
CCN1
VEGFC
TNFRSF11B
CRK
IL1R1
BTF3P11
IL18R1
EMX2
ZHX2
JAK1
ANGPT2
PPARG
POLDIP2
ANG
AHSA1
TNFSF10
OPRM1
SERPINE1
ETS1
CCR5
PDGFRA
NTRK2
AIMP2
PRRT2
RNF19A
FOXO1
HPSE
PRKCA
CSF1
HGF
RAF1
MAP2K7
STS
KIR3DL1
KIR2DL3
MUC16
PRKCB
ANGPT1
F2R
CXCR1
IL2RB
AIF1
BRAF
NCAM1
CXCR2
KIR2DL1
MS4A1
FAS
CCR1
CD68
KIR2DS1
LTB4R2
ADIPOQ
FPR2
KRAS
MST1
GC
IL16
CTLA4
GSTP1
IL12RB1
F2
MST1R
KRT20
ACE
TMPRSS13
LMLN
LTB4R
MSMB
EBAG9
TIMP1
AKAP13
BIRC5
HLA-G
RB1
MTOR
TEK
GH1
NOS2
NOS1
ADAR
CCND1
BSG
WNT7A
CXCR4
CDH15
FST
DNMT3B
XRCC1
C5
STAT6
TERT
ACTN1
CCR8
RUNX1
CCL16
CCL21
COL18A1
CFI
PAX8
LTA
LIF
PTGES
EGF
MMP24
SULT1E1
HSD11B2
VAV1
VDR
PPIG
LYN
DNMT3A
DNMT1
LTF
SELL
KIR3DL2
CCL1
EZR
RNU1-4
C9
CYP2R1
PDGFA
C3
TNFRSF1A
L1CAM
ACP1
FGFR2
FOS
PON1
XRCC4
SFRP1
SERPINB2
PTPN22
KDR
MSI1
HTC2
KLRC1
RARRES2
TLR4
STAR
CD48
TLR3
USF2
MMP13
RELA
HPRT1
FKBP4
AMH
ANXA1
IGFBP7
MMP12
AXL
SHC1
RARRES1
MAPK3
CCL11
TNC
HSPA4
CLOCK
CD44
IL17A
CLDN5
SNCG
CYP2C19
TACR1
SPP1
CLDN3
CD36
TGFB1I1
RXFP1
ABCB6
GPER1
SKP2
AKT1
GHRH
WT1
CIB1
GHRHR
GREM1
PAK1
EIF4EBP1
ALOX15
PTGER2
ERVW-1
CDK1
CCNB1
SH2D1A
POLD1
PCNA
CLDN4
PTGER4
TSHZ1
TAC1
ALB
LPAR3
PLK1
CKS1BP7
CKS1B
HSD3B1
DRD2
PIK3CA
LOXL1
ARID1A
PROK1
PIK3CB
GDF3
OLFM4
HOXA13
TBPL2
STMN1
MUC1
KIR2DS5
FSHR
OGG1
TXNIP
ZFP42
TDGF1
CCL25
INSR
AGT
SALL4
TXN
CFL1
PGR-AS1
IRS2
HMGA2
CCR9
EPHB2
AGTR1
HOXA11
PIK3CG
HPGD
SLC33A1
HMGA1
CXCL12
APEX1
HTRA1
UTF1
PIK3CD
XRCC3
SST
FOXP3
PAPPA
VTN
BECN1
ITGA5
CCL14
ATM
KITLG
NFKB1
AGTR2
GPX3
CFD
NEFM
ISG20
IHH
FCRL3
ABI3BP
VCAN
IFNGR1
CD226
ERRFI1
IFIT1
CLDN1
AKR1C2
IMPA2
CRH
CYP1A2
ITGB8
KLF13
TRH
CPM
PRLR
PLXNC1
TAGLN
LAMB1
RGS4
ITGB1
AKR1C1
GATM
CDKN1A
UCN
HBEGF
BMP7
SLC16A6
RASGRP1
MIR135B
FN1
NRP1
ITGA2
CXCR3
NTRK3
CYB5A
MUC4
CRHR1
DICER1
CNIH3
DCSTAMP
TGFB2
IL1RAP
ACACA
SLC7A8
UST
DEPP1
TACSTD2
LMOD1
RORB
CYP26A1
IL7R
UCN2
SCGB3A1
SELENOP
KLF9
SOX2
IGFBP6
AKR1C3
HNF1B
CDX1
AREG
METTL7A
BNC2
CSF2
SLC1A1
ACTA2
LOXL4
MIR21
OSR2
ENPP1
TOB1
ELAVL1
DIO2
HERC5
INHA
IDO1
MYLIP
NR0B2
SULF2
FBLN1
CXCL14
FKBP5
HS3ST3B1
STC2
RASL11A
SRD5A1
LGALS3
ARHGAP28
ABCC9
ANKH
NDNF
MAOB
UCN3
DUSP2
AQP2
ANO4
CD82
MAOA
FBN1
DKK1
CNR1
CD55
SLC20A1
C1R
UTS2
SMPDL3A
BMS1
DUSP1
SLC40A1
LRRK2
SRD5A2
ANKRD1
CCNE2
FMO2
LINC02210-CRHR1
NEDD4L
FAM180A
HDAC2
SPARCL1
MTA2
NECTIN4
COPS2
HSD17B3
TSLP
HDAC9
NCOA1
MED14
HDAC1
THRA
CPB2
FGD6
NECTIN3
CDC42
KISS1
MIR126
GREB1
NTF4
CADM1
MED16
NR3C2
NCOA6
APOE
KCNQ2
DDX5
ITGB3BP
NECTIN1
PAX2
NR1D2
NR1I2
AMHR2
ROCK1
MIR20A
S1PR1
MAT2A
BDNF
NR3C1
SERPINF1
PVR
TERF1
NCOR1
PF4V1
SRR
GATA3
MTA1
AGR2
MED4
TBX21
CHD5
NR4A1
MED17
PDIA3
PLCB4
RARB
SLC52A1
ATAD3A
SGPP2
MRC1
RNASE3
CADM2
MUC2
SPHKAP
ACTN4
F2RL1
MED1
NR2C2
S1PR2
NR2C1
PLCB1
KISS1R
S100A4
F3
IPO13
VEZT
RBPJ
NR2F6
PF4
MET
CSF1R
BRD8
NRAS
EIF1
BMP4
DEFB4B
SRY
DEFB4A
CEBPA
MIR483
MIR542
MYL9
ARTN
ANXA2
CRABP2
CETP
MAP2K1
TLR2
MIR10B
BRS3
SYT1
POU5F1
SDC1
POU5F1P3
EGR1
STAT3
ACKR3
TYK2
CXCR6
CCL17
BMPR1B
MSH6
PAK4
CX3CL1
UCHL1
LPAR2
MSH2
MIR195
CRHR2
AGRP
NFKBIA
TNFRSF21
MIR629
NOD1
WNT4
EDNRA
POU5F1P4
MIR17
WNT3A
LAMC2
SUCLG2
MIR122
SELE
CAPN7
PROM1
WNK1
ADRA2B
RHOC
KLF11
BAX
ABCC4
CALD1
CCN2
MIR196B
PDCD6
CDKN2B-AS1
GPR42
ADRA1A
MIR520G
MIR145
MIR22
SSTR4
CD19
DPYSL2
GORASP1
HSD3B2
RUNX3
DCN
BIRC3
H4C5
RBP1
H4C14
H4C8
SRA1
DPP6
NANOG
SRC
SIRT1
POLE
SLC2A3
H4C4
H4C15
GJB2
GJA1
H4C2
CDC6
H4C9
DCLRE1C
LOC110806263
BCL2L1
H4C11
MME
H4-16
H4C1
QRSL1
ASTN2
P2RX3
LGALS1
GATA6
H4C13
SLC2A1
TGFBI
CRISPLD2
SMAD2
GATA2
H4C6
PPARGC1A
BIRC2
MYB
TCF3
H3-4
SCN11A
CYP11A1
SLC2A4
CREB1
SLIT3
GFM1
MIR451A
NOTCH1
MAPK8
PPP2R1A
MIR183
DPP4
RASSF2
HIF1A
H4C3
FGA
H4C12
LIPC
HSH2D
PHB
TMED7
HEY1
HLA-C
TMED7-TICAM2
SMAD3
PTGFR
NR5A2
SMAD4
HES5
IAPP
TICAM2
NOTCH4
AKR1B1
MIRLET7B
GNRH1
JUN
CXCL13
PPP5C
ZNRD2
LHCGR
MYC
H3P23
SERPINA1
IFI27
MIR200A
MIR191
DCTN6
MIR210
SOD1
PSMD9
P2RX5
CARM1
SNAI1
PPT1
S100A6
HLA-B
PLA2G2A
IL33
DLL4
MAGT1
TIMP3
ALPP
IGF1R
ESRRB
MIR141
DAPK1
CD47
ALPI
CDK6
MUC17
KIFAP3
TWIST1
FPR1
SNAI2
POSTN
MIR29C
MIRLET7D
AQP5
CAB39L
LOX
GPX4
EZH2
ZNF217
YWHAZ
SOX15
FOXD3
TTC39B
SDC4
PSMD10
KLRK1
TET1
IL37
KLRC4-KLRK1
ACTB
VWF
CREB3L1
TET3
CASR
DNMT3L
MAP2
KLF10
SYP
HMGB1
CSK
FSHB
PHB2
MECP2
STC1
MIR196A2
LINC00339
DECR1
COL1A1
MIR200B
CLCN3
MIR503
MIR100
FLT1
CD40LG
CYP3A4
IL27
IFNA13
CCR7
RETN
GLI1
TFF3
CCNE1
ID2
TGFBR1
PNO1
GALNT6
MIR200C
BCL6
REM1
SRRM2
SMOC2
EPCAM
IL23A
VTA1
MIR30C1
SEMA3C
MIR33B
IGSF8
MAK16
LINC00261
VPS11
ARSD
CSF3
IL17D
MEGF8
NDRG1
ZFP36
CRP
MIR27B
STX5
OXTR
MALAT1
LGALS9
EPHB4
GABPA
ACVR2B
MIA
MIR30A
CFTR
MANEA
SEMA6A
RNU1-1
PTBP1
MIR30C2
MYDGF
ZEB1
PRELP
RBMS3
PNN
CTH
CCL19
MIR34A
GALNT3
TPM3
SH3BP4
IFNA1
LGR5
REN
YAP1
CCDC22
TREM2
YBX1
MSTN
IL2RA
TMOD3
PDIK1L
NFE2L2
NLRC5
IL2
PSMD2
MIR378A
THY1
CTCF
TECR
HOXB4
EIF3E
FJX1
LILRB1
PDGFRB
VPS53
ELAVL2
SULT2A1
STIP1
MIR375
MBL3P
IL21
CD274
MNAT1
NGF
RMDN1
MIR139
FOXP1
SYBU
MIR33A
SQSTM1
CACYBP
CD86
CCDC80
MIR31
BAG6
TRPC6
H2AX
FSCN1
MIR363
PDCD1
DENR
RASA1
MIR181C
FEN1
LINC01672
GTF2H1
CD200
OR9Q1
EMSLR
KIR2DL4
CD79A
XBP1
LMNB1
NUP62
CD163
MBL2
IL7
MAP1LC3B
TCF21
KNG1
USP10
DCTN4
DUSP6
ILK
MIR449B
VIM
ITGAM
CD200R1
DLX5
TIMP4
TNFRSF6B
MIR154
SMARCC1
MIR1185-1
VIP
IL22
TGFB3
CD74
ANK1
DNM1L
MAS1
IL32
GBA
KHDRBS1
SFRP2
HOXA11-AS
CARD11
SARDH
CX3CR1
GLI3
NGFR
CRMP1
TYROBP
UGT1A1
ARX
SSTR1
PTPRC
MIR148A
CASP3
MIR143
ADM
UTRN
MIR381
S100B
FOXA2
MIR204
ADA
HCK
SMARCA1
ENPP3
PTPRD
STN1
SERPING1
TRERF1
TRPV1
DAPK2
FCGR3B
S100A1
RMDN3
LIPG
SRL
PDCD4
EDN1
CSE1L
TSPO
CHRM3
NCR3
RMDN2
MIR23B
SERPINH1
MIR214
RGS6
SLC22A23
PEA15
LILRB2
FCGR3A
BCL10
SKAP1
SOX9
HDAC3
AXIN1
IL9
ANTXR2
SIRPA
FOXM1
CALCA
CTHRC1
IER3
FOXO3
FZD7
CCDC144NL-AS1
FANCD2
ERCC2
NINJ1
PDLIM5
USP17L2
KCNQ1
ERCC1
BCAR3
MIR342
NT5E
SEMA3E
GDNF
LINC01541
CXCL9
RBFOX1
ATG3
INTU
MIR132
MIR2861
SFXN1
LIPE
MDM2
ULBP3
AFAP1-AS1
RGPD2
LBR
TNS1
ZP3
MIR3613
PARP1
MIR216A
ENTPD1
CD14
MIR142
P2RY6
CLDN7
ACVR1B
IL34
HYAL2
MIR146B
AQP9
ULBP2
AGFG2
HAND2
NTF3
CXCL16
MR1P1
CPP
MIR488
MIR370
ST6GALNAC1
BTK
IL12B
CDK4
AQP1
NUP210
BCL2L11
RHOG
ROBO4
RXRA
SULT1A1
CCL22
BTG1
NRN1
CLDN11
PSEN1
RNF34
ROS1
HAS1
STAT4
KIF20A
FAM215A
LIMK1
ERCC6
MIR205
SLIT2
LINC02605
ARG1
CHUK
TFDP1
DLX3
ADAM17
RHOF
MIR4634
UGT2B28
EPHA3
PLXND1
EXTL3
GPBAR1
NHS
GSK3B
MIR543
AFAP1
DOCK11
PCAT1
THOC6
INHBA
