# Supplementary material for: Molecular Mechanisms of Endometriosis Revealed Using Omics Data
Source: Biomedicines. 2023 Aug 7;11(8):2210. doi: 10.3390/biomedicines11082210 (PMC10452455; doi:10.3390/biomedicines11082210)
Supplement: Supplementary file 1 [file biomedicines-11-02210-s001.zip › Supplementary Table S2.xlsx]

## Sheet: Supplementary Table S2
GOBP	Gene	OR	P value		GOBP: gene ontology biological process
GOBP_REGULATION_OF_CELL_POPULATION_PROLIFERATION	ADA;CDH3;PDCD6;TOB1;CDK4;CDK6;CDKN1A;CDKN1B;LILRB2;CDKN2A;CDKN3;NDRG1;YAP1;CARM1;CEBPA;CIB1;TXNIP;CTCF;HPSE;LILRB1;PPARGC1A;NUDT6;PHB2;FCRL3;CTHRC1;OSR2;LRRK2;SGPP2;ADM;CPB2;CLDN3;CLDN7;CRP;MAPK14;CSF1;CSF1R;CSF2;CSF3;CSK;IL34;ADRA1A;CCN2;CTLA4;CTNNB1;GPBAR1;CX3CR1;CYP1B1;CD55;ACE;AKR1C2;ARX;DLX5;DNMT1;DPP4;DRD2;AGT;HBEGF;DUSP1;AGTR1;S1PR1;EDN1;EGF;EGFR;EGR1;AHR;AIF1;EPHB2;EPO;EPOR;ERBB2;AKT1;ESR…	16.799	2.53e-283		Gene: common genes between input genes and genes of a gene set
GOBP_POSITIVE_REGULATION_OF_MULTICELLULAR_ORGANISMAL_PROCESS	ADA;PDCD6;KLRC4-KLRK1;RASGRP1;PLXNC1;LILRB2;PAK4;NOD1;YAP1;FST;CIB1;CD226;CFL1;CFTR;HPSE;LILRB1;PPARGC1A;CHRM3;CHUK;OSR2;LRRK2;CCR1;CCR7;CNR1;COL1A1;ADM;CPB2;CRABP2;CREB1;CRH;PARP1;MAPK14;CSF1;CSF1R;CSF2;IL34;ADRA1A;CCN2;CTNNB1;ADRA2B;CX3CR1;CYP1B1;CYP19A1;CD55;ACE;DECR1;ARX;DIO2;AGRP;DRD2;AGT;AGTR2;EDN1;EGF;MEGF8;EGR1;AIF1;ENO1;EPHB2;AKT1;ESRRB;ETS1;EZH2;F2;F2R;F2RL1;F3;FCGR3A;FGA;FGF1;FGF2;FGF9…	15.9221	9.92e-247		OR: odds ratio
GOBP_RESPONSE_TO_OXYGEN_CONTAINING_COMPOUND	BCL2L11;KLRC4-KLRK1;ABCC9;CDK4;CDKN1B;LILRB2;NOD1;YAP1;CARM1;CXCL13;TXNIP;POSTN;CFTR;LILRB1;CHRM3;PHB2;UCN3;CHUK;LRRK2;CCR5;CCR7;CNR1;COL1A1;ADM;CPB2;CLDN4;CLDN3;CLDN7;CREB1;CRHR1;CRHR2;CRK;SIRPA;PARP1;MAPK14;CSF1;CSF2;CSF3;CSK;CCN2;CTNNB1;GPBAR1;CX3CR1;CYP1A1;CYP1B1;CYP11A1;CYP19A1;CYP26A1;CD55;DAPK1;ACE;AKR1C1;AKR1C2;DIO2;DNMT1;DNMT3A;AGRP;DRD2;AGT;AGTR1;AGTR2;EDN1;EDNRA;EGFR;EGR1;AHR;AHSG;AIF1…	14.7136	8.69e-241
GOBP_RESPONSE_TO_ENDOGENOUS_STIMULUS	SRA1;BCL2L11;TOB1;CDK4;CDKN1B;NOD1;YAP1;FST;CARM1;CIB1;CXCL13;TXNIP;CFTR;BRD8;CHRM3;PHB2;UCN3;LRRK2;CCR7;COL1A1;ADM;CLDN4;CREB1;CRHR1;CRHR2;CRK;PARP1;MAPK14;CSF1;CSK;ADRA1A;CCN2;CTNNB1;CX3CR1;CYP1B1;CYP11A1;ACE;AKR1C1;AKR1C2;DDX5;DLX3;DLX5;DNMT1;DNMT3A;AGRP;DRD2;AGT;AGTR1;AGTR2;EDN1;EDNRA;MEGF8;EGFR;EGR1;AHR;AHSG;AIF1;EPHB2;EPO;ERBB2;AKT1;ESR1;ESR2;ESRRB;EZH2;FBN1;FGF1;FGF2;FGF9;FGFR2;FKBP4;DKK1;…	14.5949	4e-234
GOBP_REGULATION_OF_CELL_DIFFERENTIATION	ADA;SRA1;RASGRP1;TOB1;PLXNC1;CDK6;CDKN1B;LILRB2;YAP1;FST;CARM1;CEBPA;SEMA3C;CIB1;OLFM4;CETP;LILRB1;FCRL3;CTHRC1;LRRK2;H4-16;CCR1;COL1A1;ADM;CRABP2;CREB1;CRK;CRP;PARP1;MAPK14;CSF1;CSF2;CSF3;IL34;CCN2;	14.0166	4.07e-224
GOBP_REGULATION_OF_MULTICELLULAR_ORGANISMAL_DEVELOPMENT	ADA;CDH3;PDCD6;RASGRP1;PLXNC1;CDK6;CDKN1B;LILRB2;PAK4;YAP1;FST;CEBPA;SEMA3C;CIB1;CXCL13;CFL1;CFTR;HPSE;LILRB1;FCRL3;OSR2;H4-16;CCR1;ADM;CRABP2;CREB1;MAPK14;CSF1;CSF3;IL34;CCN2;CTLA4;CTNNB1;CX3CR1;CYP1B1;DCN;ACE;DRD2;AGT;DUSP6;S1PR1;EDN1;EGF;MEGF8;AHSG;EPHB2;ERBB2;AKT1;ETS1;EZH2;F2;F3;FANCD2;FBN1;FGF1;FGF2;FGF9;FGFR2;KIFAP3;DKK1;FOXO3;PLXND1;FLT1;PLCB1;FN1;DICER1;SIRT1;HEY1;FOS;LPAR3;IL27;MTOR;FSH…	14.9503	1.31e-222
GOBP_REGULATION_OF_CELL_DEATH	ADA;SRA1;BCL2L11;DNM1L;CDKN1A;CDKN1B;CDKN2A;PAK4;ADAR;NOD1;YAP1;CIB1;AGR2;OLFM4;TXNIP;MTCO2P12;CFL1;LILRB1;PPARGC1A;BRD8;PHB2;LRRK2;CCR7;CNR1;CD200R1;ADM;CLDN7;PARP1;CSF1;CSF1R;CSF2;CSF3;CCN2;CTH;CTLA4;CTNNB1;CX3CR1;CYP1B1;DAPK1;ACE;DNMT1;DNMT3A;DRD2;AGT;DUSP6;AGTR2;EDN1;EGFR;EGR1;AIF1;ENO1;EPO;AKT1;ESR1;ALB;F2R;FGA;FGF2;FGFR2;KIFAP3;DKK1;FOXO1;FOXO3;AKR1B1;PLXND1;SIRT1;FOS;DAPK2;NUP62;MTOR;GATA2…	13.4199	2.63e-218
GOBP_APOPTOTIC_PROCESS	ADA;SRA1;PDCD6;BCL2L11;DNM1L;CDKN1A;CDKN1B;CDKN2A;PAK4;ADAR;NOD1;YAP1;CIB1;OLFM4;TXNIP;CFL1;LILRB1;PPARGC1A;BRD8;PHB2;LRRK2;CCR7;CNR1;ADM;CLDN7;PARP1;MAPK14;CSF1R;CSF2;ADRA1A;CTH;CTLA4;CTNNB1;CX3CR1;CYP1B1;DAPK1;ACE;DDX5;DNMT1;DNMT3A;AGT;DUSP6;AGTR2;EDN1;EDNRA;EGFR;EGR1;AHR;AIF1;ENO1;EPO;ERCC2;AKT1;ERCC6;ESR1;ALB;F2R;FGA;FGFR2;KIFAP3;DKK1;FOXO1;FOXO3;AKR1B1;PLXND1;DICER1;SIRT1;ITGB3BP;DAPK2;NUP62…	12.043	2.85e-212
GOBP_POSITIVE_REGULATION_OF_SIGNALING	ADA;CDH3;BCL2L11;DNM1L;RASGRP1;LILRB2;NOD1;YAP1;CIB1;AGR2;CD226;CFTR;HPSE;AKAP13;PHB2;UCN3;CHUK;FCRL3;LRRK2;CCR1;CCR7;CNR1;COL1A1;CREB1;CRH;CRHR2;CRK;PARP1;CSF1;CSF1R;CSF3;CSK;IL34;ADRA1A;CCN2;CTH;CTNNB1;ADRA2B;GPBAR1;CX3CR1;CYP1B1;CYP19A1;DCN;AKR1C2;DDX5;DLX5;DRD2;AGT;HBEGF;AGTR2;EDN1;EGF;EGFR;EPHB2;EPO;ERBB2;EZH2;F2;F2R;F2RL1;F3;FGA;FGF1;FGF2;FGF9;FGFR2;DKK1;FLT1;PLCB1;FN1;SIRT1;LPAR3;FPR2;NUP6…	12.4219	2e-206
GOBP_RESPONSE_TO_LIPID	BCL2L11;KLRC4-KLRK1;CDK4;CDKN1B;LILRB2;YAP1;CARM1;CXCL13;TXNIP;CFTR;LILRB1;PHB2;UCN3;CCR5;CCR7;CNR1;COL1A1;ADM;CLDN4;CREB1;SIRPA;PARP1;MAPK14;CSF1;CSF2;CSF3;CCN2;CTNNB1;GPBAR1;CX3CR1;CYP1A1;CYP1B1;CYP19A1;CYP26A1;CD55;ACE;AKR1C1;AKR1C2;DDX5;DIO2;DNMT3A;AGT;EDN1;EGFR;AHR;AIF1;EPHA3;EPHB2;EPO;AKT1;ESR1;ESR2;ESRRB;EZH2;F2R;FGFR2;FKBP4;KLRK1;DKK1;FOXO1;FOXO3;PLCB1;SIRT1;FOS;PTPN22;GATA2;GATA6;GBA;MST…	19.4707	9.95e-206
GOBP_POSITIVE_REGULATION_OF_DEVELOPMENTAL_PROCESS	ADA;PDCD6;DNM1L;RASGRP1;PLXNC1;LILRB2;PAK4;YAP1;FST;CARM1;CEBPA;CIB1;AGR2;OLFM4;CFL1;CFTR;HPSE;PPARGC1A;CTHRC1;OSR2;CCR1;COL1A1;ADM;CRABP2;CREB1;CRK;PARP1;MAPK14;CSF1;CSF2;CSF3;IL34;CCN2;CTH;CTNNB1;ADRA2B;CX3CR1;CYP1B1;DCN;ACE;ARX;DRD2;AGT;AGTR1;AGTR2;EDN1;EGF;MEGF8;EPHB2;EPO;AKT1;ESRRB;ETS1;EZH2;F3;FGA;FGF1;FGF2;FGF9;FGFR2;DKK1;FOXO3;PLXND1;FLT1;PLCB1;NEDD4L;FN1;DICER1;SIRT1;FOS;LPAR3;MTOR;NR5A1…	14.3046	3.19e-204
GOBP_LOCOMOTION	ADA;CDKN2B-AS1;MIR543;PDCD6;KLRC4-KLRK1;DNM1L;PLXNC1;CDK6;SEMA3C;CIB1;OLFM4;CXCL13;CXCR6;CCR9;LRRK2;CCR1;CCR5;CCR7;CCR8;COL1A1;CD200R1;CLDN4;CLDN3;CLDN7;CRK;CRMP1;MAPK14;CSF1;CSF1R;CSF2;IL34;CX3CR1;CYP1B1;CYP19A1;DCN;ACE;DEFB4A;ARX;DLX5;DPP4;DPYSL2;DRD2;AGT;HBEGF;DUSP1;AGTR1;AGTR2;S1PR1;EDN1;EDNRA;EGF;MEGF8;EGFR;AIF1;EPHA3;EPHB2;EPHB4;ERBB2;AKT1;ETS1;F2R;F2RL1;F3;FBLN1;FGF1;FGF2;FGF9;KLRK1;FOXO3;…	13.637	1.24e-199
GOBP_POSITIVE_REGULATION_OF_CELL_POPULATION_PROLIFERATION	ADA;CDH3;PDCD6;CDK4;CDK6;CDKN1A;CDKN1B;LILRB2;YAP1;CARM1;CIB1;HPSE;FCRL3;CTHRC1;OSR2;ADM;CLDN7;MAPK14;CSF1;CSF1R;CSF2;CSF3;IL34;CCN2;CTNNB1;GPBAR1;CX3CR1;CD55;AKR1C2;DLX5;DNMT1;DPP4;DRD2;AGT;HBEGF;AGTR1;S1PR1;EDN1;EGF;EGFR;EGR1;AIF1;EPHB2;EPO;EPOR;ERBB2;AKT1;ESR1;EZH2;F2;F2R;F3;FCGR3A;FGF1;FGF2;FGF9;FGFR2;FOXM1;FLT1;FN1;SIRT1;FSHB;PTPN22;GATA2;GATA6;GREM1;GDNF;GHRH;GHRHR;GJA1;FOXP1;GLI1;GLI3;ANG;…	17.8398	3.95e-199
GOBP_CELL_MOTILITY	ADA;CDKN2B-AS1;MIR543;PDCD6;KLRC4-KLRK1;DNM1L;PLXNC1;CDK6;PAK4;SEMA3C;CIB1;OLFM4;CXCL13;CXCR6;CCR9;PHB2;CTHRC1;LRRK2;CCR1;CCR5;CCR7;CCR8;COL1A1;CD200R1;CLDN4;CLDN3;CLDN7;CRK;SIRPA;MAPK14;CSF1;CSF1R;CSF2;IL34;CCN2;CTNNB1;CX3CR1;CYP1B1;CYP19A1;DCN;ACE;DEFB4A;ARX;DPP4;DRD2;AGT;HBEGF;DUSP1;AGTR1;AGTR2;S1PR1;EDN1;EDNRA;EGF;MEGF8;EGFR;AIF1;EMX2;EPHA3;EPHB2;EPHB4;AKT1;ETS1;F2R;F2RL1;F3;FBLN1;FGF1;FGF2;F…	11.8145	6.25e-198
GOBP_TUBE_DEVELOPMENT	ADA;PDCD6;BCL2L11;PAK4;YAP1;CEBPA;SEMA3C;CIB1;AGR2;CXCL13;HPSE;PHB2;CTHRC1;ADM;CREB1;CRH;MAPK14;CSF1;CSF1R;CCN2;CTNNB1;ADRA2B;CX3CR1;CYP1A1;CYP1A2;CYP1B1;DCN;ACE;AGT;AGTR1;AGTR2;S1PR1;EDN1;EDNRA;EGF;MEGF8;EGFR;EMX2;EPHB2;EPHB4;ERBB2;AKT1;ESR1;ETS1;F3;FGF1;FGF2;FGF9;FGFR2;AKR1B1;PLXND1;FLT1;FN1;SIRT1;HEY1;GATA2;GATA3;GATA6;GREM1;GDNF;GJB2;FOXP1;INTU;GLI1;GLI3;ANG;CXCR3;ANGPT1;ANGPT2;NR3C1;ANXA1;AN…	15.2214	1.1e-190
GOBP_REGULATION_OF_IMMUNE_SYSTEM_PROCESS	ADA;KLRC4-KLRK1;DNM1L;RASGRP1;CDK6;CDKN1A;LILRB2;ADAR;NOD1;CEBPA;CIB1;OLFM4;CXCL13;KHDRBS1;CD226;LILRB1;PHB2;FCRL3;LRRK2;H4-16;CCR1;CCR7;CNR1;CD200R1;CREB1;CRK;SIRPA;PARP1;MAPK14;CSF1;CSF1R;CSF3;CSK;IL34;CTLA4;CTNNB1;CX3CR1;CYP19A1;CD55;CFD;DPP4;DRD2;DUSP1;EDN1;AHR;AIF1;EPHB2;EPO;ERBB2;AKT1;ESR1;ETS1;F2RL1;FANCD2;FBN1;FCGR3A;FCGR3B;KLRK1;FOXO3;PLCB1;FN1;SIRT1;FOS;FPR1;FPR2;DAPK2;CADM1;ALOX15;IL27…	12.6423	2.28e-190
GOBP_CELLULAR_RESPONSE_TO_ENDOGENOUS_STIMULUS	SRA1;BCL2L11;TOB1;CDK4;NOD1;YAP1;FST;CARM1;CIB1;CXCL13;CFTR;BRD8;CHRM3;PHB2;UCN3;LRRK2;COL1A1;CRHR1;CRHR2;CRK;PARP1;CSF1;CSK;CCN2;CTNNB1;CX3CR1;CYP1B1;CYP11A1;ACE;AKR1C1;AKR1C2;DDX5;DLX3;DLX5;DNMT1;DNMT3A;AGRP;DRD2;AGT;AGTR1;AGTR2;EDN1;EDNRA;MEGF8;EGFR;EGR1;AHR;AHSG;AIF1;EPHB2;ERBB2;AKT1;ESR1;ESR2;ESRRB;EZH2;FBN1;FGF1;FGF2;FGF9;FGFR2;FKBP4;DKK1;FOXO1;FOXO3;PLCB1;SIRT1;FOS;FPR2;SH3BP4;MTOR;FSHB;FS…	13.0629	1.52e-185
GOBP_DEFENSE_RESPONSE	ADA;KLRC4-KLRK1;ABCC9;RASGRP1;LILRB2;ADAR;NOD1;CEBPA;CXCL13;CXCR6;CD226;CCR9;LILRB1;PHB2;CHUK;LRRK2;CCR1;CCR5;CCR7;LTB4R;CNR1;CD200R1;ADM;CRH;CRK;CRP;SIRPA;PARP1;MAPK14;CSF1;CSF1R;IL34;CX3CR1;CYP19A1;CD55;DAPK1;ACE;DEFB4A;CFD;DPP4;DRD2;AGT;AGTR1;AGTR2;EDN1;AHSG;AIF1;EPHB2;EPO;AKT1;ESR1;ETS1;EZH2;F2;F2R;F2RL1;F3;FANCD2;FCGR3A;FGA;KLRK1;FN1;FOS;FPR1;FPR2;CADM1;ALOX15;IL27;MTOR;NCR3;PTPN22;GATA3;GAT…	10.8075	2.38e-180
GOBP_REGULATION_OF_LOCOMOTION	ADA;CDKN2B-AS1;MIR543;PDCD6;KLRC4-KLRK1;DNM1L;PLXNC1;CDK6;SEMA3C;CIB1;OLFM4;CXCL13;LRRK2;CCR1;CCR7;COL1A1;CD200R1;CLDN4;CLDN3;CLDN7;CRK;MAPK14;CSF1;CSF1R;CSF2;IL34;CX3CR1;CYP1B1;CYP19A1;DCN;ACE;DPP4;DRD2;AGT;HBEGF;DUSP1;AGTR2;S1PR1;EDN1;EGF;MEGF8;EGFR;AIF1;EPHB2;AKT1;ETS1;F2R;F2RL1;F3;FBLN1;FGF1;FGF2;FGF9;KLRK1;FOXO3;PLXND1;FLT1;PLCB1;FN1;SIRT1;CAPN7;FPR2;DAPK2;MTOR;FSHB;GATA2;GATA3;GREM1;MSTN;GJ…	14.4886	4.26e-178
GOBP_REGULATION_OF_RESPONSE_TO_EXTERNAL_STIMULUS	ADA;KLRC4-KLRK1;DNM1L;RASGRP1;ADAR;NOD1;CEBPA;SEMA3C;CXCL13;CD226;HPSE;LILRB1;LRRK2;CCR1;CCR7;CNR1;CD200R1;CPB2;CLDN3;CRK;SIRPA;PARP1;MAPK14;CSF1;CSF1R;IL34;CX3CR1;CYP19A1;CD55;ACE;DPP4;DRD2;AGT;DUSP1;AGTR1;S1PR1;EDN1;MEGF8;AHSG;AIF1;EPHB2;ESR1;ETS1;F2;F2R;F2RL1;F3;FANCD2;FGA;FGF1;FGF2;KLRK1;FPR2;DAPK2;CADM1;ALOX15;IL27;NCR3;PTPN22;GATA3;GATA6;GBA;GREM1;MSTN;FOXP1;IL37;PDCD4;ANGPT2;GPER1;GPX4;GST…	15.5333	7.8e-177
GOBP_CIRCULATORY_SYSTEM_DEVELOPMENT	PDCD6;CDKN1A;CDKN1B;PAK4;YAP1;SEMA3C;CIB1;CXCL13;PDLIM5;HPSE;AKAP13;COL1A1;ADM;CREB1;MAPK14;ADRA1A;CCN2;CTH;CTNNB1;ADRA2B;CX3CR1;CYP1B1;DCN;ACE;DLX3;DNMT1;AGT;DUSP6;AGTR1;S1PR1;EDN1;EDNRA;EGF;MEGF8;EGFR;EGR1;AHR;EPHB2;EPHB4;EPOR;ERBB2;AKT1;ETS1;F3;FBN1;FGF1;FGF2;FGF9;FGFR2;DKK1;NCOA6;FOXO1;PLXND1;FLT1;FN1;SIRT1;HEY1;MTOR;GATA2;GATA3;GATA6;GREM1;GJA1;ANKRD1;FOXP1;CACYBP;PDCD4;GLI1;GLI3;ANG;CXCR3;A…	13.7106	1.51e-176
GOBP_TISSUE_DEVELOPMENT	ADA;CDH3;PDCD6;CDK4;CDK6;CDKN1B;YAP1;CDX1;FST;CEBPA;SEMA3C;AGR2;PDLIM5;TXNIP;POSTN;CFTR;HPSE;PPARGC1A;AKAP13;PHB2;CTHRC1;OSR2;CCR1;COL1A1;ADM;CLDN3;CRABP2;CREB1;PARP1;MAPK14;CSF1;CSF1R;ADRA1A;CCN2;CTNNB1;CYP1A1;CYP1B1;AKR1C1;AKR1C2;DDX5;ARX;DLX3;DLX5;AGT;HBEGF;DUSP1;DUSP2;AGTR2;S1PR1;EDN1;EDNRA;EGF;MEGF8;EGFR;EGR1;AHSG;EPHA3;EPOR;ERCC2;AKT1;ESR1;EZH2;F2RL1;FGF1;FGF2;FGF9;FGFR2;DKK1;AKR1B1;PLXND1;…	9.9781	4.46e-175
GOBP_INFLAMMATORY_RESPONSE	ADA;RASGRP1;NOD1;CEBPA;CXCL13;CXCR6;CHUK;LRRK2;CCR1;CCR5;CCR7;LTB4R;CNR1;CD200R1;ADM;CRH;CRP;SIRPA;MAPK14;CSF1;CSF1R;IL34;CX3CR1;CYP19A1;ACE;AGT;AGTR1;AGTR2;AHSG;AIF1;EPHB2;EPO;AKT1;ESR1;ETS1;EZH2;F2;F2R;F2RL1;F3;FANCD2;FCGR3A;FN1;FOS;FPR1;FPR2;ALOX15;IL27;MTOR;NCR3;GATA3;GBA;FOXP1;IL37;PDCD4;CXCR3;GPER1;GPX4;CXCL1;GSTP1;ANXA1;HCK;HGF;HIF1A;HK1;HLA-DRB1;HMGB1;HP;BIRC2;BIRC3;APOA2;TNC;IFNG;IFNGR1;…	17.3121	4.93e-172
GOBP_REGULATION_OF_INTRACELLULAR_SIGNAL_TRANSDUCTION	ADA;PDCD6;BCL2L11;DNM1L;RASGRP1;PAK4;NOD1;CIB1;HPSE;AKAP13;PHB2;CHUK;FCRL3;LRRK2;CCR1;CCR7;CRK;SIRPA;PARP1;MAPK14;CSF1;CSF1R;CSF3;CSK;IL34;ADRA1A;CCN2;CTH;CTNNB1;ADRA2B;GPBAR1;CX3CR1;DCN;AKR1C2;DDX5;DRD2;AGT;HBEGF;DUSP1;DUSP2;DUSP6;EDN1;EGF;EGFR;ENO1;EPHB2;EPO;ERBB2;AKT1;ESR1;EZH2;F2;F2R;F2RL1;F3;FBLN1;FGA;FGF1;FGF2;FGFR2;DKK1;FOXM1;FOXO1;FLT1;PLCB1;FN1;SIRT1;LPAR3;FPR2;DAPK2;NUP62;SH3BP4;ALOX15;…	10.5501	6.04e-172
GOBP_REGULATION_OF_RESPONSE_TO_STRESS	ADA;BCL2L11;KLRC4-KLRK1;RASGRP1;ADAR;NOD1;CEBPA;AGR2;CD226;HPSE;LILRB1;BRD8;LRRK2;CCR7;CNR1;CD200R1;CPB2;CLDN4;CLDN3;CRK;SIRPA;PARP1;MAPK14;CCN2;CTNNB1;CYP19A1;ACE;DDX5;DRD2;AGT;HBEGF;DUSP1;AGTR1;EDN1;EGFR;AHSG;ENO1;EPHB2;EPO;ERCC1;AKT1;ERCC6;ESR1;ETS1;F2;F2R;F2RL1;F3;FANCD2;FGA;FGF2;KLRK1;FOXM1;FOXO1;FOXO3;PLCB1;SIRT1;FPR2;CADM1;ALOX15;IL27;MTOR;NCR3;PTPN22;GATA3;GATA6;GBA;GREM1;ANKRD1;FOXP1;IL3…	11.9438	1.32e-171
GOBP_TUBE_MORPHOGENESIS	PDCD6;BCL2L11;PAK4;YAP1;CIB1;AGR2;CXCL13;HPSE;PHB2;CTHRC1;ADM;MAPK14;CSF1;CSF1R;CCN2;CTNNB1;ADRA2B;CX3CR1;CYP1B1;DCN;ACE;AGT;AGTR1;AGTR2;S1PR1;EDN1;EDNRA;EGF;MEGF8;EGFR;EMX2;EPHB2;EPHB4;ERBB2;AKT1;ESR1;ETS1;F3;FGF1;FGF2;FGF9;FGFR2;PLXND1;FLT1;FN1;SIRT1;HEY1;GATA2;GATA3;GATA6;GREM1;GDNF;FOXP1;GLI1;GLI3;ANG;CXCR3;ANGPT1;ANGPT2;NR3C1;ANXA1;ANXA2;HGF;HIF1A;HLA-G;NR4A1;HOXA11;HOXA13;HPGD;ID2;APOE;CCN1…	15.9112	3.69e-171
GOBP_ANATOMICAL_STRUCTURE_FORMATION_INVOLVED_IN_MORPHOGENESIS	ADA;PDCD6;BCL2L11;PAK4;MYL9;YAP1;CDX1;SEMA3C;CIB1;CXCL13;CFTR;HPSE;AKAP13;CTHRC1;COL1A1;ADM;MAPK14;CCN2;CTNNB1;ADRA2B;CX3CR1;CYP1B1;CYP19A1;DCN;ACE;DLX5;AGT;DUSP1;DUSP2;AGTR1;S1PR1;EDN1;EDNRA;EGF;EPHB2;EPHB4;ERBB2;ERCC1;ERCC2;AKT1;ETS1;F3;FGF1;FGF2;FGF9;FGFR2;DKK1;PLXND1;FLT1;FN1;DICER1;SIRT1;HEY1;FJX1;GABPA;LMOD1;GATA2;GATA3;GATA6;GBA;GREM1;GDNF;GJA1;ANKRD1;GLI3;ANG;CXCR3;ANGPT1;ANGPT2;TMOD3;SLC…	13.0804	5.62e-171
GOBP_NEGATIVE_REGULATION_OF_RESPONSE_TO_STIMULUS	ADA;PDCD6;KLRC4-KLRK1;TOB1;ADAR;YAP1;FST;SEMA3C;CIB1;CXCL13;LILRB1;PHB2;FCRL3;CTHRC1;LRRK2;CD200R1;ADM;CPB2;CLDN3;CRK;SIRPA;PARP1;MAPK14;CSF2;CSK;ADRA1A;CTH;CTLA4;CTNNB1;CX3CR1;CYP19A1;CYP26A1;CD55;DCN;DPP4;DRD2;AGT;DUSP1;DUSP2;DUSP6;AGTR2;EDN1;MEGF8;EGFR;EGR1;AHR;AHSG;AIF1;ENO1;EPHB2;EPO;ERCC1;AKT1;ERCC6;ESR1;EZH2;F2;F2RL1;FBLN1;FBN1;FGA;FGF2;FGF9;KLRK1;DKK1;FOXM1;FOXO1;FOXO3;SIRT1;HEY1;FPR2;NUP…	10.6173	2.96e-169
GOBP_POSITIVE_REGULATION_OF_GENE_EXPRESSION	CDKN2B-AS1;CDH3;KLRC4-KLRK1;RASGRP1;TOB1;CDK6;LILRB2;ADAR;NOD1;YAP1;CEBPA;AGR2;KHDRBS1;CTCF;CD226;HPSE;LILRB1;PPARGC1A;PHB2;CHUK;OSR2;LRRK2;CCR7;CLDN3;CRP;MAPK14;CSF1;CSF1R;CSF2;IL34;CCN2;CTNNB1;CYP1B1;CD55;DDX5;ARX;DLX5;DNMT1;DNMT3B;DRD2;AGT;EGF;EGFR;EGR1;AIF1;ELAVL1;ENO1;EPHB2;ERBB2;AKT1;ESR1;ETS1;F2R;F2RL1;F3;FCGR3A;FGF1;FGF2;FGF9;KLRK1;DKK1;PLCB1;FN1;SIRT1;HEY1;CADM1;IL27;MTOR;FSHB;NR5A1;GABP…	13.2846	1.23e-166
GOBP_NEGATIVE_REGULATION_OF_CELL_DEATH	ADA;CDKN1B;PAK4;ADAR;YAP1;CIB1;AGR2;CFL1;LILRB1;PPARGC1A;PHB2;LRRK2;CCR7;CD200R1;CLDN7;CSF1;CSF1R;CSF2;CSF3;CCN2;CTH;CTNNB1;CX3CR1;DAPK1;DNMT1;DRD2;EDN1;EGFR;AIF1;ENO1;EPO;AKT1;ALB;F2R;FGA;FGF2;FGFR2;KIFAP3;DKK1;FOXO1;AKR1B1;PLXND1;SIRT1;NUP62;MTOR;GATA2;GATA3;GATA6;GBA;GREM1;GDNF;FOXP1;PDCD4;GLI3;ANGPT1;GPX4;GSK3B;GSTP1;SLC40A1;ANXA1;HCK;HDAC1;HDAC2;HGF;HIF1A;NR4A1;BIRC2;BIRC3;BIRC5;HSPD1;ICAM1;…	14.5039	6.15e-166
GOBP_RESPONSE_TO_HORMONE	SRA1;BCL2L11;CDK4;CDKN1B;YAP1;CARM1;TXNIP;BRD8;PHB2;UCN3;CCR7;COL1A1;ADM;CLDN4;CREB1;CRHR1;CRHR2;CRK;PARP1;MAPK14;CSF1;CSK;ADRA1A;CCN2;CYP1B1;CYP11A1;ACE;AKR1C1;AKR1C2;DDX5;AGRP;AGT;AGTR1;AGTR2;EDN1;EDNRA;EGR1;AHSG;AIF1;EPO;AKT1;ESR1;ESR2;ESRRB;FBN1;FKBP4;NCOA6;FOXO1;FOXO3;PLCB1;SIRT1;FOS;MTOR;FSHR;NR5A2;NR5A1;GATA3;GATA6;GBA;MSTN;GH1;GHRHR;GJB2;FOXP1;GLI3;GNRH1;GNRHR;ANG;GPER1;NR3C1;GSK3B;GTF2H1…	16.3672	3.15e-164
GOBP_CELLULAR_RESPONSE_TO_OXYGEN_CONTAINING_COMPOUND	BCL2L11;KLRC4-KLRK1;CDK4;LILRB2;NOD1;YAP1;CXCL13;POSTN;CFTR;LILRB1;CHRM3;PHB2;CHUK;LRRK2;CCR5;COL1A1;CPB2;CREB1;CRHR1;CRHR2;CRK;SIRPA;PARP1;MAPK14;CSF2;CSF3;CSK;CTNNB1;GPBAR1;CX3CR1;CYP1B1;CYP11A1;CD55;DAPK1;ACE;AKR1C1;AKR1C2;DNMT1;DNMT3A;DRD2;AGT;AGTR1;AGTR2;EDN1;EDNRA;EGFR;EGR1;AHR;AHSG;AIF1;EPHA3;EPHB2;AKT1;ESR1;ESR2;EZH2;FBN1;FGFR2;KLRK1;FOXO1;FOXO3;PLCB1;SIRT1;FOS;FPR2;SH3BP4;MTOR;GABPA;PTPN…	12.6679	6.27e-163
GOBP_NEGATIVE_REGULATION_OF_MULTICELLULAR_ORGANISMAL_PROCESS	ADA;CDH3;CDK6;CDKN1B;CEBPA;SEMA3C;CXCL13;LILRB1;PHB2;CCR1;CCR7;CD200R1;ADM;CPB2;CRH;SIRPA;CSK;ADRA1A;CTLA4;CTNNB1;CX3CR1;DCN;ACE;DRD2;AGT;AGTR2;EDN1;EGFR;AHSG;EPHB2;ERBB2;EZH2;F2;F2R;F2RL1;FBN1;FGA;FGF2;KIFAP3;DKK1;FOXO1;FN1;DICER1;HEY1;NR5A1;PTPN22;GATA2;GATA3;GATA6;GBA;GREM1;MSTN;GJA1;FOXP1;IL37;TNFRSF21;PDCD4;HPGDS;GLI3;ANGPT1;ANGPT2;MYLIP;CD274;GSK3B;GSTP1;TBX21;ANXA1;ANXA2;HDAC1;HDAC2;HGF;HI…	13.0391	1.17e-162
GOBP_CELL_ADHESION	ADA;CDH3;BCL2L11;KLRC4-KLRK1;RASGRP1;CDH15;PLXNC1;CDK6;LILRB2;CDKN2A;PAK4;MYL9;CIB1;AGR2;OLFM4;CXCL13;PDLIM5;POSTN;CD226;HPSE;LILRB1;MMP24;CCR1;CCR7;CCR8;COL1A1;CD200R1;CLDN4;CLDN3;CLDN7;CRK;SIRPA;MAPK14;CSF1;CSK;VCAN;CCN2;CTLA4;CTNNB1;CCDC80;CX3CR1;CYP1B1;CD55;DPP4;DUSP1;S1PR1;EGFR;AIF1;EPHA3;EPHB2;EPHB4;EPO;ERBB2;AKT1;ETS1;FBLN1;FBN1;FGA;KLRK1;KIFAP3;FOXO3;PLXND1;ASTN2;FN1;ITGB3BP;FPR2;CADM1;AL…	10.4697	1.1e-154
GOBP_VASCULATURE_DEVELOPMENT	PDCD6;PAK4;YAP1;SEMA3C;CIB1;CXCL13;HPSE;COL1A1;ADM;MAPK14;CCN2;CTH;CTNNB1;ADRA2B;CX3CR1;CYP1B1;DCN;ACE;DLX3;DNMT1;AGT;AGTR1;S1PR1;EDN1;EDNRA;EGF;MEGF8;EGR1;AHR;EPHB2;EPHB4;ERBB2;AKT1;ETS1;F3;FGF1;FGF2;FGF9;FGFR2;FOXO1;PLXND1;FLT1;FN1;SIRT1;HEY1;GATA2;GATA6;GREM1;PDCD4;GLI3;ANG;CXCR3;ANGPT1;ANGPT2;GPER1;ANXA1;ANXA2;HGF;HIF1A;HLA-G;NR4A1;HOXA13;HPGD;APOE;CCN1;RBPJ;IHH;IL1A;IL1B;FASLG;IL6;CXCL8;CXCR…	16.0298	5.29e-154
GOBP_IMMUNE_SYSTEM_DEVELOPMENT	ADA;BCL2L11;RASGRP1;CDK6;LILRB2;ADAR;FST;CEBPA;CIB1;CCR9;LILRB1;FCRL3;H4-16;CCR1;CCR7;CREB1;DOCK11;PARP1;MAPK14;CSF1;CSF1R;CSF2;CSF3;IL34;CTLA4;CTNNB1;ACE;EGR1;EPO;EPOR;ERBB2;ERCC1;ERCC2;ETS1;EZH2;F2RL1;FANCD2;FBN1;FGFR2;NCOA6;FOXO3;FLT1;SIRT1;FOS;IL27;MTOR;FSHB;GABPA;PTPN22;GATA2;GATA3;GBA;FOXP1;GLI3;ANGPT1;CD274;MSH6;TMOD3;TBX21;SLC40A1;ANXA1;ANXA2;HIF1A;HLA-B;HLA-DRB1;HLA-G;HMGB1;HOXB4;HSPD1;I…	13.4507	2.11e-152
GOBP_BIOLOGICAL_PROCESS_INVOLVED_IN_INTERSPECIES_INTERACTION_BETWEEN_ORGANISMS	KLRC4-KLRK1;ABCC9;RASGRP1;CDK4;CDK6;LILRB2;ADAR;NOD1;CXCL13;CD226;CFL1;LILRB1;PHB2;CHUK;CCR5;CCR7;CNR1;ADM;CLDN3;CRK;CRP;SIRPA;PARP1;MAPK14;CSF1;CSF1R;CSF2;CSF3;IL34;CCDC80;CX3CR1;CYP1A1;CD55;DAPK1;ACE;DEFB4A;CFD;DIO2;DPP4;DRD2;AGTR1;EDN1;EGFR;AIF1;ENO1;EPHB2;EPO;AKT1;F2;F2R;F2RL1;FCGR3A;FGA;FGFR2;FKBP5;KLRK1;FN1;FOS;FPR2;CADM1;IL27;NCR3;PTPN22;GATA3;GATA6;GJB2;ANKRD1;FOXP1;IL37;PDCD4;ANG;GPER1;C…	9.66639	4.19e-152
GOBP_REGULATION_OF_PHOSPHORUS_METABOLIC_PROCESS	DNM1L;RASGRP1;CDKN1A;CDKN1B;LILRB2;CDKN2A;ADAR;CDKN3;CEBPA;CIB1;MTCO2P12;PPARGC1A;AKAP13;PHB2;FCRL3;CKS1B;LRRK2;CCR7;CLDN3;SIRPA;PARP1;CSF1;CSF1R;CSF2;CSF3;CSK;IL34;ADRA1A;CCN2;ADRA2B;CX3CR1;ACE;DRD2;AGT;HBEGF;DUSP1;DUSP6;AGTR2;EDN1;EGF;EGFR;EGR1;AIF1;ENO1;EPHA3;EPHB2;EPHB4;EPO;ERBB2;AKT1;ERCC6;EZH2;F2;FBLN1;FGF1;FGF2;FGF9;FGFR2;DKK1;FLT1;FN1;SIRT1;FPR2;NUP62;MTOR;PTPN22;GBA;GREM1;MSTN;GH1;PDCD4;…	10.7904	1.63e-151
GOBP_RESPONSE_TO_ORGANIC_CYCLIC_COMPOUND	ADA;BCL2L11;ABCC9;CDK4;CDKN1B;PAK4;YAP1;FST;CARM1;CEBPA;TXNIP;CFTR;CHRM3;PHB2;UCN3;LRRK2;CCR5;CNR1;COL1A1;ADM;CLDN4;CREB1;PARP1;CSF1;CCN2;CTNNB1;GPBAR1;CYP1A1;CYP1B1;CYP19A1;ACE;DDX5;DNMT1;DNMT3A;DRD2;AGT;DUSP6;EDN1;EGFR;EGR1;AHR;AIF1;EPO;ESR1;ESR2;ESRRB;EZH2;FKBP4;FOXO3;PLCB1;SIRT1;FOS;GABPA;GATA6;GBA;MSTN;AMH;GH1;GHRHR;GJB2;FOXP1;GNRH1;ANGPT2;GPER1;GPX4;NR3C1;GSK3B;GSTM2;ANXA1;HDAC1;HDAC2;HOXA1…	14.1701	3.13e-149
GOBP_POSITIVE_REGULATION_OF_MOLECULAR_FUNCTION	CDH3;PDCD6;BCL2L11;RASGRP1;CDKN1A;CDKN1B;NOD1;CIB1;CXCL13;AHSA1;CFTR;PPARGC1A;AKAP13;PHB2;CHUK;FCRL3;CTHRC1;CKS1B;LRRK2;CCR7;CLDN4;CLDN3;CRHR1;CRK;DOCK11;PARP1;MAPK14;CSF1;CSF1R;CSF3;CSK;IL34;ADRA1A;CCN2;CTH;CTNNB1;ADRA2B;CX3CR1;DAPK1;ACE;DRD2;AGT;HBEGF;AGTR1;AGTR2;S1PR1;EDN1;EDNRA;EGF;EGFR;EGR1;EPHA3;EPHB2;EPHB4;EPO;ERBB2;ERCC2;AKT1;ERCC6;ESR1;ESR2;EZH2;F2;F2R;F2RL1;F3;FBLN1;FGF1;FGF2;FGFR2;DKK1…	9.93935	9.42e-149
GOBP_NEGATIVE_REGULATION_OF_DEVELOPMENTAL_PROCESS	CDH3;SRA1;TOB1;CDK6;CDKN1A;CDKN1B;YAP1;FST;CARM1;CEBPA;SEMA3C;CIB1;CETP;LILRB1;H4-16;CCR1;CRP;CTLA4;CTNNB1;DCN;DNMT1;AGT;EGFR;AHSG;EPHB2;ERBB2;ESRRB;EZH2;F2;FBLN1;FBN1;FGF9;ZHX2;KIFAP3;DKK1;FOXO1;FOXO3;DICER1;SIRT1;HEY1;NR5A1;GABPA;GATA2;GATA3;GREM1;MSTN;AMH;FOXP1;PDCD4;GLI3;ANGPT2;GPER1;GSK3B;TBX21;ANXA1;HDAC1;HDAC2;HIF1A;HLA-G;HMGB1;FOXA2;IAPP;ID2;IFNG;IGF1;RBPJ;IHH;IL1A;IL1B;IL2;FASLG;IL4;IL6;…	13.4049	1.5e-148
GOBP_POSITIVE_REGULATION_OF_LOCOMOTION	CDKN2B-AS1;PDCD6;DNM1L;SEMA3C;CIB1;CXCL13;CCR1;CCR7;COL1A1;CLDN4;CLDN3;CLDN7;CRK;MAPK14;CSF1;CSF1R;CSF2;IL34;CX3CR1;CYP1B1;AGT;HBEGF;S1PR1;EDN1;EGF;MEGF8;EGFR;AIF1;EPHB2;AKT1;ETS1;F2R;F2RL1;F3;FGF1;FGF2;FGF9;FLT1;FN1;SIRT1;CAPN7;FPR2;DAPK2;MTOR;FSHB;GATA2;GATA3;MSTN;FOXP1;ANGPT1;GPER1;CD274;ANXA1;HGF;HIF1A;HMGB1;ICAM1;IFNG;IGF1;IGF1R;CCN1;IL1A;IL1B;IL1R1;IL4;IL6;CXCL8;CXCR2;AQP1;IL16;CXCL10;INSR;…	19.6355	3.18e-148
GOBP_POSITIVE_REGULATION_OF_CELL_DIFFERENTIATION	ADA;RASGRP1;PLXNC1;LILRB2;YAP1;CARM1;CEBPA;CIB1;OLFM4;CTHRC1;CCR1;COL1A1;ADM;CRABP2;CREB1;CRK;PARP1;MAPK14;CSF1;CSF2;CSF3;IL34;CCN2;CTH;CTNNB1;ADRA2B;CX3CR1;ACE;DRD2;AGT;AGTR1;EDN1;MEGF8;EPHB2;EPO;AKT1;ETS1;EZH2;FGA;FGF2;DKK1;FOXO3;PLXND1;PLCB1;FN1;DICER1;SIRT1;FOS;LPAR3;MTOR;GATA2;GATA3;GATA6;GDNF;GJA1;GLI3;GPER1;GSK3B;ANXA1;HDAC1;HDAC2;HGF;HIF1A;HLA-DRB1;HLA-G;HMGB1;HOXA11;HOXB4;ID2;IFNG;IGF1;I…	13.8645	6.98e-144
GOBP_POSITIVE_REGULATION_OF_INTRACELLULAR_SIGNAL_TRANSDUCTION	ADA;BCL2L11;DNM1L;RASGRP1;NOD1;CIB1;HPSE;AKAP13;PHB2;CHUK;FCRL3;LRRK2;CCR1;CCR7;CRK;CSF1;CSF1R;CSF3;CSK;IL34;ADRA1A;CCN2;CTH;CTNNB1;ADRA2B;GPBAR1;CX3CR1;DCN;AKR1C2;DDX5;DRD2;AGT;HBEGF;EDN1;EGF;EGFR;EPO;ERBB2;EZH2;F2;F2R;F2RL1;F3;FGA;FGF1;FGF2;FGFR2;DKK1;FLT1;PLCB1;FN1;SIRT1;LPAR3;FPR2;NUP62;ALOX15;FSHR;CHD5;PTPN22;GATA3;GREM1;GH1;GJA1;ANKRD1;PDCD4;ANGPT1;GPER1;CCDC22;HGF;HLA-DRB1;HMGB1;BIRC2;BIRC…	12.8278	9.61e-143
GOBP_CELL_ACTIVATION	ADA;KLRC4-KLRK1;RASGRP1;CDK6;CDKN1A;LILRB2;NDRG1;MYL9;CEBPA;CD226;CCR9;LILRB1;PHB2;FCRL3;LRRK2;CCR7;CNR1;DOCK11;SIRPA;MAPK14;CSF1;CSF2;CSK;CCN2;CTLA4;CTNNB1;ADRA2B;CX3CR1;CD55;DPP4;EDN1;EGR1;AHR;AIF1;EPHB2;EPO;ERBB2;ERCC1;AKT1;EZH2;F2;F2R;F2RL1;FANCD2;FCGR3A;FGA;KLRK1;FOXO3;PLCB1;FN1;CADM1;IL27;MTOR;NCR3;PTPN22;GATA2;GATA3;GBA;FOXP1;TNFRSF21;GLI3;GPER1;CD274;MSH6;TBX21;ANXA1;HLA-DPB1;HLA-DQB1;HLA…	11.7082	1.04e-141
GOBP_MAPK_CASCADE	RASGRP1;PAK4;NOD1;CIB1;AKAP13;PHB2;FCRL3;LRRK2;CCR1;CCR5;CCR7;CRK;SIRPA;MAPK14;CSF1R;CSK;IL34;ADRA1A;CCN2;CTNNB1;ADRA2B;GPBAR1;DRD2;AGT;DUSP1;DUSP2;DUSP6;EDN1;EGF;EGFR;EPHB2;EPO;ERBB2;ERCC6;EZH2;F2R;F2RL1;FBLN1;FGA;FGF1;FGF2;FGFR2;DKK1;FOXM1;FOXO1;FLT1;PLCB1;FN1;LPAR3;FPR2;NUP62;ALOX15;FSHR;PTPN22;GBA;GREM1;GH1;PDCD4;ANGPT1;GPER1;GSTP1;HGF;HLA-DRB1;HMGB1;IAPP;ICAM1;IGF1;APOE;IGF1R;IGFBP3;IGFBP6;C…	15.0918	3.51e-141
GOBP_POSITIVE_REGULATION_OF_PROTEIN_METABOLIC_PROCESS	PDCD6;BCL2L11;RASGRP1;TOB1;CDKN1A;CDKN1B;LILRB2;NOD1;CEBPA;CIB1;KHDRBS1;PPARGC1A;AKAP13;PHB2;FCRL3;CKS1B;LRRK2;CCR7;CLDN4;CLDN3;CSF1;CSF1R;CSF2;CSF3;CSK;IL34;ADRA1A;CCN2;CTNNB1;ADRA2B;CX3CR1;CYP1B1;DAPK1;ACE;DNMT1;DNMT3B;DRD2;AGT;HBEGF;AGTR1;AGTR2;EDN1;EGF;EGFR;EGR1;AIF1;ELAVL1;ENO1;EPO;ERBB2;AKT1;ERCC6;EZH2;F2;F2R;F3;FBLN1;FGF1;FGF2;FGF9;DKK1;FOXO1;FLT1;PLCB1;FN1;SIRT1;FPR2;MTOR;RNF19A;PTPN22;GA…	9.78515	3.97e-141
GOBP_RESPONSE_TO_CYTOKINE	CDK4;LILRB2;ADAR;YAP1;CEBPA;CIB1;CXCL13;CXCR6;CCR9;LILRB1;STIP1;CHUK;CCR1;CCR5;CCR7;CCR8;COL1A1;CREB1;SIRPA;MAPK14;CSF1;CSF1R;CSF2;CSF3;IL34;CTH;CX3CR1;CYP1B1;DAPK1;DOK1;DUSP1;EDN1;EGR1;AIF1;EPO;EPOR;AKT1;F2RL1;F3;FOXO3;PLCB1;SIRT1;FOS;ALOX15;NR5A2;GATA3;GBA;ANKRD1;FOXP1;CACYBP;IL37;TNFRSF21;CXCR3;ANGPT1;GPER1;CD274;CXCL1;PDIA3;GSK3B;GSTP1;ANXA1;HCK;HIF1A;FOXA2;BIRC2;BIRC3;ICAM1;IFI27;IFIT1;IFNA1…	13.3589	6.72e-140
GOBP_REGULATION_OF_CELL_ADHESION	ADA;KLRC4-KLRK1;RASGRP1;PLXNC1;CDK6;LILRB2;CDKN2A;CIB1;AGR2;OLFM4;CXCL13;LILRB1;CCR7;COL1A1;CLDN7;CRK;SIRPA;MAPK14;CSF1;CSK;CTLA4;CCDC80;CYP1B1;CD55;DPP4;DUSP1;S1PR1;AIF1;EPHA3;EPHB2;EPO;ERBB2;AKT1;ETS1;FBLN1;FGA;KLRK1;KIFAP3;FOXO3;PLXND1;FN1;ALOX15;ABI3BP;POLDIP2;PTPN22;GATA3;GREM1;TNFRSF21;GLI3;CXCR3;ANGPT1;ANGPT2;CD274;GSK3B;TBX21;ANXA1;HLA-DPB1;HLA-DQB1;HLA-DRB1;HLA-G;HMGB1;FOXA2;HSPD1;TNC;IF…	14.7996	3.54e-139
GOBP_BLOOD_VESSEL_MORPHOGENESIS	PDCD6;PAK4;YAP1;CIB1;CXCL13;HPSE;ADM;MAPK14;CCN2;CTNNB1;ADRA2B;CX3CR1;CYP1B1;DCN;ACE;AGT;AGTR1;S1PR1;EDN1;EDNRA;EGF;EPHB2;EPHB4;ERBB2;AKT1;ETS1;F3;FGF1;FGF2;FGF9;FGFR2;PLXND1;FLT1;FN1;SIRT1;HEY1;GATA2;GATA6;GREM1;ANG;CXCR3;ANGPT1;ANGPT2;ANXA1;ANXA2;HGF;HIF1A;HLA-G;NR4A1;HOXA13;HPGD;APOE;CCN1;RBPJ;IHH;IL1A;IL1B;FASLG;IL6;CXCL8;CXCR2;AQP1;IL10;IL12B;IL18;CXCL10;ITGA5;ITGAV;ITGB1;ITGB3;ITGB8;JAK1;JU…	16.3573	1.27e-138
GOBP_PHOSPHORYLATION	RASGRP1;CDK4;CDK6;CDKN1A;CDKN1B;CDKN2A;PAK4;ADAR;CDKN3;CEBPA;CIB1;AKAP13;PHB2;CHUK;CKS1B;LRRK2;CCR7;CLDN3;CREB1;SIRPA;MAPK14;CSF1;CSF1R;CSF2;CSF3;CSK;IL34;ADRA1A;CCN2;PDIK1L;ADRA2B;CX3CR1;DAPK1;ACE;DRD2;AGT;HBEGF;DUSP1;DUSP6;EDN1;EDNRA;EGF;EGFR;EGR1;AIF1;ENO1;EPHA3;EPHB2;EPHB4;EPO;ERBB2;AKT1;ERCC6;EZH2;F2;FBLN1;FGF1;FGF2;FGF9;FGFR2;DKK1;FLT1;FN1;SIRT1;FPR2;DAPK2;NUP62;MTOR;PTPN22;GBA;GREM1;MSTN;A…	8.54515	8.12e-138
GOBP_IMMUNE_RESPONSE	ADA;KLRC4-KLRK1;RASGRP1;LILRB2;ADAR;NOD1;SEMA3C;CXCL13;KHDRBS1;CXCR6;CD226;CCR9;LILRB1;PHB2;CHUK;FCRL3;CCR1;CCR5;CCR7;CCR8;LTB4R;CNR1;CD200R1;CRHR1;CRK;DOCK11;CRP;SIRPA;PARP1;MAPK14;CSF1;CSF1R;CSF2;CSF3;CSK;IL34;CTLA4;CX3CR1;CD55;DAPK1;DEFB4A;CFD;DRD2;EDN1;AHR;AIF1;EPHB2;ERCC1;ESR1;ETS1;F2;F2RL1;FCGR3A;FCGR3B;FGA;KLRK1;SIRT1;FPR1;FPR2;CADM1;ALOX15;IL27;MTOR;NCR3;PTPN22;GATA2;GATA3;GATA6;FOXP1;IL3…	8.34103	1.52e-137
GOBP_REGULATION_OF_PROTEIN_MODIFICATION_PROCESS	PDCD6;RASGRP1;CDKN1A;CDKN1B;LILRB2;CDKN2A;ADAR;CDKN3;CEBPA;CIB1;CTCF;PPARGC1A;AKAP13;PHB2;FCRL3;CKS1B;LRRK2;CCR7;CLDN3;SIRPA;CSF1;CSF1R;CSF2;CSF3;CSK;IL34;ADRA1A;CCN2;CTNNB1;ADRA2B;CX3CR1;ACE;DNMT1;DNMT3B;DRD2;AGT;HBEGF;DUSP1;DUSP6;AGTR2;EDN1;EGF;EGFR;EGR1;AIF1;EPHB2;EPO;ERBB2;AKT1;ERCC6;EZH2;F2;FBLN1;FGF1;FGF2;FGF9;DKK1;FLT1;FN1;SIRT1;FPR2;NUP62;MTOR;PTPN22;GATA2;GATA3;GBA;GREM1;MSTN;GH1;PDCD4;A…	9.35734	1.62e-137
GOBP_POSITIVE_REGULATION_OF_PHOSPHORUS_METABOLIC_PROCESS	RASGRP1;CDKN1A;CDKN1B;LILRB2;CIB1;MTCO2P12;PPARGC1A;AKAP13;PHB2;FCRL3;CKS1B;LRRK2;CCR7;CLDN3;CSF1;CSF1R;CSF2;CSF3;CSK;IL34;ADRA1A;CCN2;ADRA2B;CX3CR1;ACE;DRD2;AGT;HBEGF;AGTR2;EDN1;EGF;EGFR;EGR1;AIF1;ENO1;EPHA3;EPHB2;EPHB4;EPO;ERBB2;AKT1;ERCC6;EZH2;F2;FGF1;FGF2;FGF9;FGFR2;DKK1;FLT1;SIRT1;FPR2;MTOR;GBA;GREM1;MSTN;GH1;ANG;ANGPT1;GPER1;HDAC2;HGF;HIF1A;HLA-DRB1;BIRC5;IFNA1;IFNA13;IFNG;IGF1;IGF1R;CCN1;F…	13.2076	4.6e-136
GOBP_REGULATION_OF_PROTEIN_PHOSPHORYLATION	RASGRP1;CDKN1A;CDKN1B;CDKN2A;ADAR;CDKN3;CEBPA;CIB1;AKAP13;PHB2;CKS1B;LRRK2;CCR7;CLDN3;SIRPA;CSF1;CSF1R;CSF2;CSF3;CSK;IL34;ADRA1A;CCN2;ADRA2B;CX3CR1;ACE;DRD2;AGT;HBEGF;DUSP1;DUSP6;EDN1;EGF;EGFR;EGR1;AIF1;EPHB2;EPO;ERBB2;AKT1;ERCC6;EZH2;F2;FBLN1;FGF1;FGF2;FGF9;DKK1;FLT1;FN1;SIRT1;FPR2;NUP62;MTOR;PTPN22;GBA;GREM1;MSTN;GH1;PDCD4;ANG;ANGPT1;GPER1;GSTP1;GTF2H1;HDAC2;HGF;HLA-DRB1;BIRC5;IFNA1;IFNA13;IFNG…	11.298	1.96e-133
GOBP_POSITIVE_REGULATION_OF_IMMUNE_SYSTEM_PROCESS	ADA;KLRC4-KLRK1;DNM1L;RASGRP1;CDKN1A;LILRB2;NOD1;CEBPA;CXCL13;KHDRBS1;CD226;LILRB1;PHB2;FCRL3;LRRK2;CCR1;CCR7;CNR1;CREB1;SIRPA;CSF1;CSF1R;CSK;IL34;CTLA4;CX3CR1;CD55;CFD;DPP4;EDN1;AIF1;EPHB2;EPO;AKT1;F2RL1;FCGR3A;KLRK1;FOXO3;SIRT1;FOS;FPR1;FPR2;DAPK2;CADM1;NCR3;PTPN22;GATA2;GATA3;MSTN;FOXP1;TNFRSF21;GLI3;CD274;TBX21;ANXA1;HCK;HK1;HLA-B;HLA-DPB1;HLA-DQB1;HLA-DRB1;HLA-G;HMGB1;HSPD1;ICAM1;ID2;CFI;IFN…	12.1582	6.35e-129
GOBP_POSITIVE_REGULATION_OF_PHOSPHORYLATION	RASGRP1;CDKN1A;CDKN1B;CIB1;AKAP13;PHB2;CKS1B;LRRK2;CCR7;CLDN3;CSF1;CSF1R;CSF2;CSF3;CSK;IL34;ADRA1A;CCN2;ADRA2B;CX3CR1;ACE;DRD2;AGT;HBEGF;EDN1;EGF;EGFR;EGR1;AIF1;EPHA3;EPHB2;EPHB4;EPO;ERBB2;AKT1;ERCC6;EZH2;F2;FGF1;FGF2;FGF9;FGFR2;DKK1;FLT1;SIRT1;FPR2;MTOR;GREM1;MSTN;GH1;ANG;ANGPT1;GPER1;HDAC2;HGF;HIF1A;HLA-DRB1;BIRC5;IFNA1;IFNA13;IFNG;IGF1;IGF1R;CCN1;FAS;IL1B;IL2;IL4;IL6;IL11;IL12B;IL13;IL15;IL18;…	13.3359	4.46e-127
GOBP_REGULATION_OF_TRANSPORT	ADA;CDH3;DNM1L;ABCC9;LILRB2;CIB1;OLFM4;KHDRBS1;CETP;CFTR;LILRB1;PRRT2;SCN11A;CHRM3;PHB2;UCN3;FCRL3;LRRK2;CCR1;CNR1;CPB2;CLDN3;CREB1;CRH;CRHR1;SIRPA;MAPK14;CSK;ADRA1A;CNIH3;CTNNB1;ADRA2B;TTC39B;CYP19A1;DAPK1;ACE;DPP6;DRD2;AGT;AGTR1;EDN1;EDNRA;EGF;AHSG;EPHA3;EPHB2;EPO;ERBB2;AKT1;F2;F2R;F2RL1;FGA;DKK1;FOXO1;NEDD4L;SIRT1;FPR2;ALOX15;GATA2;GREM1;GDNF;GH1;GHRH;GHRHR;GJA1;ANKRD1;GLI3;ANG;ANGPT1;GPER1;RE…	8.16109	2.08e-126
GOBP_HOMEOSTATIC_PROCESS	ADA;CDH3;BCL2L11;ABCB6;CDK6;ADAR;YAP1;CEBPA;CETP;CFTR;PPARGC1A;CLCN3;LRRK2;CCR1;CCR5;CCR7;CNR1;ADM;CPB2;CLDN4;CLDN3;DOCK11;MUC17;MAPK14;CSF1;CSF1R;CSK;CCN2;CTNNB1;CX3CR1;TTC39B;ACE;AKR1C1;DECR1;DIO2;DRD2;AGT;AGTR1;S1PR1;EDN1;EDNRA;EGR1;EPO;ERCC2;AKT1;ERCC6;ESRRB;ETS1;ALB;EZH2;F2;F2R;FGF2;FOXO1;FOXO3;AKR1B1;FMO2;SIRT1;SLC7A8;FSHB;NR5A2;GATA2;GATA3;GATM;GBA;MSTN;GHRHR;GJA1;ANG;ANGPT1;GPER1;CCDC22;M…	8.37092	3.54e-126
GOBP_NEGATIVE_REGULATION_OF_CELL_POPULATION_PROLIFERATION	TOB1;CDK6;CDKN1A;CDKN1B;LILRB2;CDKN2A;CDKN3;NDRG1;CEBPA;CIB1;CTCF;LILRB1;PPARGC1A;NUDT6;PHB2;ADM;CPB2;CLDN3;CRP;CSF1R;CSK;ADRA1A;CTLA4;CTNNB1;CYP1B1;DRD2;DUSP1;AIF1;ERBB2;ETS1;F2R;FBLN1;FGF2;FGFR2;KIFAP3;FLT1;DICER1;NUP62;SH3BP4;CHD5;GATA2;GATA3;GATA6;GREM1;MSTN;INTU;TNFRSF21;PDCD4;HPGDS;GLI3;ANG;GPER1;CD274;CXCL1;GSTP1;HLA-DRB1;HLA-G;HMGA1;IFNG;APOE;IGFBP3;IGFBP6;IGFBP7;RBPJ;IHH;IL1A;IL1B;IL2;IL…	13.6714	1.19e-125
GOBP_POSITIVE_REGULATION_OF_CATALYTIC_ACTIVITY	CDH3;PDCD6;BCL2L11;RASGRP1;CDKN1A;CDKN1B;NOD1;CIB1;CXCL13;AKAP13;PHB2;FCRL3;CKS1B;LRRK2;CCR7;CLDN4;CLDN3;CRHR1;CRK;DOCK11;MAPK14;CSF1;CSF1R;CSK;IL34;ADRA1A;CCN2;CTNNB1;ADRA2B;DAPK1;ACE;DRD2;AGT;HBEGF;AGTR1;AGTR2;S1PR1;EDN1;EDNRA;EGF;EGFR;EGR1;EPHA3;EPHB2;EPHB4;EPO;ERBB2;AKT1;ERCC6;ESR1;EZH2;F2;F2R;F2RL1;F3;FBLN1;FGF1;FGF2;FGFR2;DKK1;FLT1;FN1;SIRT1;MTOR;FSHR;GREM1;GDNF;GH1;GHRHR;ANG;ANGPT1;GPER1;G…	10.3024	3.03e-125
GOBP_RESPONSE_TO_ABIOTIC_STIMULUS	ADA;PDCD6;CDKN1A;CDKN1B;NDRG1;YAP1;TXNIP;MTCO2P12;MMP24;PHB2;UCN3;COL1A1;ADM;CPB2;CLDN3;PARP1;MAPK14;CSF1;CCN2;CTNNB1;CYP1A1;ACE;DIO2;DNMT3A;DPP4;AGRP;DRD2;AGT;EDN1;EDNRA;EGFR;EGR1;AIF1;ENO1;EPO;NR2F6;ERCC1;ERCC2;AKT1;ERCC6;FANCD2;FEN1;FGF1;FGF2;FOXO1;FOXO3;AKR1B1;SIRT1;FOS;MTOR;GATA3;GATA6;GBA;MSTN;ANKRD1;ANG;ANGPT2;GSK3B;MSH6;ANXA1;H2AX;HDAC2;HIF1A;NR4A1;BIRC2;HSD11B2;HSPD1;ID2;IGF1;IGF1R;IGFBP…	10.4375	3.63e-123
GOBP_CYTOKINE_PRODUCTION	CDH3;KLRC4-KLRK1;RASGRP1;LILRB2;NOD1;CD226;HPSE;LILRB1;CHUK;LRRK2;CCR7;CD200R1;CRP;SIRPA;MAPK14;CSF1R;CSF2;CSK;CX3CR1;CYP1B1;CD55;DRD2;AGT;EGR1;AIF1;EPHB2;EZH2;F2;F2R;F2RL1;F3;FCGR3A;KLRK1;PLCB1;FN1;DICER1;SIRT1;CADM1;IL27;PTPN22;GATA3;GATA6;GBA;FOXP1;IL37;TNFRSF21;PDCD4;ANGPT1;CD274;GSTP1;TBX21;ANXA1;HDAC2;HGF;HIF1A;HK1;HLA-B;HLA-DPB1;HLA-DRB1;HLA-G;HMGB1;HSPD1;APOA2;IFNG;IFNGR1;IGF1;IL1A;IL1B;I…	12.8647	7.02e-123
GOBP_POSITIVE_REGULATION_OF_PROTEIN_MODIFICATION_PROCESS	PDCD6;RASGRP1;CDKN1A;CDKN1B;LILRB2;CIB1;PPARGC1A;AKAP13;PHB2;FCRL3;CKS1B;LRRK2;CCR7;CLDN3;CSF1;CSF1R;CSF2;CSF3;CSK;IL34;ADRA1A;CCN2;CTNNB1;ADRA2B;CX3CR1;ACE;DNMT1;DNMT3B;DRD2;AGT;HBEGF;AGTR2;EDN1;EGF;EGFR;EGR1;AIF1;EPO;ERBB2;AKT1;ERCC6;EZH2;F2;FGF1;FGF2;FGF9;DKK1;FLT1;SIRT1;FPR2;MTOR;PTPN22;GATA3;GBA;GREM1;MSTN;GH1;ANG;ANGPT1;GPER1;HDAC2;HGF;HLA-DRB1;BIRC2;BIRC3;BIRC5;IFNA1;IFNA13;IFNG;IGF1;CCN1;…	11.2367	1e-122
GOBP_NEGATIVE_REGULATION_OF_CELL_DIFFERENTIATION	SRA1;TOB1;CDK6;YAP1;FST;SEMA3C;CIB1;CETP;LILRB1;H4-16;CRP;CTLA4;CTNNB1;DNMT1;EGFR;EPHB2;ERBB2;ESRRB;EZH2;F2;FBLN1;FBN1;FGF9;ZHX2;KIFAP3;DKK1;FOXO1;FOXO3;DICER1;SIRT1;HEY1;GABPA;GATA2;GATA3;GREM1;MSTN;FOXP1;PDCD4;GLI3;GPER1;GSK3B;TBX21;ANXA1;HDAC1;HLA-G;HMGB1;FOXA2;IAPP;ID2;IFNG;IGF1;RBPJ;IHH;IL1A;IL1B;IL2;IL4;IL6;IL13;IL18;INHA;INHBA;CXCL10;ITGAV;ITGB1;ITGB3;AREG;KRAS;HES5;LTF;LYN;MIR100;MIR17;MI…	14.2531	2.2e-121
GOBP_POSITIVE_REGULATION_OF_MACROMOLECULE_BIOSYNTHETIC_PROCESS	SRA1;MED16;TOB1;YAP1;CDX1;CARM1;CEBPA;KHDRBS1;CTCF;LILRB1;PPARGC1A;BRD8;CHUK;OSR2;LRRK2;CCR7;COL1A1;CREB1;PARP1;MAPK14;CSF3;CTNNB1;CYP1B1;DCN;DLX3;DLX5;DRD2;AGT;AGTR2;S1PR1;EDN1;EGF;EGFR;EGR1;AHR;ELAVL1;TET3;EPO;ERBB2;ERCC1;AKT1;ERCC6;ESR1;ESR2;ESRRB;ETS1;F2R;F2RL1;FGF1;FGF2;FGFR2;FOXM1;NCOA6;FOXO1;FOXO3;PLCB1;SIRT1;HEY1;FOS;NUP62;MTOR;FSHB;NR5A2;NR5A1;GABPA;GATA2;GATA3;GATA6;GREM1;MSTN;GDNF;FOXD…	7.64443	2.82e-121
GOBP_CELLULAR_RESPONSE_TO_LIPID	BCL2L11;KLRC4-KLRK1;CDK4;LILRB2;YAP1;CARM1;CXCL13;CFTR;LILRB1;PHB2;CCR5;COL1A1;CREB1;SIRPA;PARP1;MAPK14;CSF2;CSF3;GPBAR1;CX3CR1;CYP1B1;CD55;ACE;AKR1C1;AKR1C2;DDX5;EDN1;EGFR;AHR;EPHA3;EPHB2;AKT1;ESR1;ESR2;ESRRB;FGFR2;FKBP4;KLRK1;FOXO3;PLCB1;SIRT1;FOS;PTPN22;MSTN;GHRHR;GJB2;ANKRD1;FOXP1;IL37;PDCD4;GPER1;NR3C1;CD274;CXCL1;GSK3B;GSTP1;ANXA1;HCK;HDAC1;HDAC2;ACACA;HMGB1;IGF1R;TICAM2;IL1A;IL1B;IL6;CXCL8…	16.1181	1.08e-120
GOBP_EPITHELIUM_DEVELOPMENT	CDH3;CDK6;CDKN1B;YAP1;CDX1;FST;CEBPA;SEMA3C;AGR2;TXNIP;HPSE;PHB2;CTHRC1;ADM;CLDN3;CREB1;CSF1;CSF1R;CTNNB1;CYP1A1;AKR1C1;AKR1C2;ARX;DLX3;DLX5;AGT;HBEGF;AGTR2;S1PR1;EDN1;EDNRA;EGF;MEGF8;EGFR;ERCC2;AKT1;ESR1;EZH2;F2RL1;FGF1;FGF2;FGFR2;DKK1;AKR1B1;PLXND1;PLCB1;ASTN2;HEY1;MTOR;NR5A2;NR5A1;GATA2;GATA3;GATA6;GREM1;GDNF;GJA1;FOXP1;INTU;GLI1;GLI3;NR3C1;GSK3B;SLC40A1;ANXA1;HDAC1;HDAC2;HGF;HIF1A;HOXA11;HOXA…	9.87607	4.98e-120
GOBP_NEGATIVE_REGULATION_OF_SIGNALING	ADA;PDCD6;TOB1;LILRB2;ADAR;YAP1;FST;CIB1;PHB2;FCRL3;CTHRC1;LRRK2;ADM;CRH;SIRPA;MAPK14;CSF2;CSK;ADRA1A;CTH;CTNNB1;CX3CR1;CYP26A1;DCN;DRD2;AGT;DUSP1;DUSP2;DUSP6;AGTR2;EDN1;MEGF8;EGFR;EGR1;AHSG;ENO1;EPHB2;EPO;AKT1;ESR1;EZH2;F2RL1;FBLN1;FBN1;FGA;FGF2;FGF9;DKK1;FOXM1;FOXO1;FOXO3;SIRT1;HEY1;NUP62;SH3BP4;MTOR;PTPN22;GATA2;GATA3;GBA;GREM1;MSTN;GDNF;GJA1;FOXP1;PDCD4;RBMS3;GLI1;GLI3;GPER1;CCDC22;GSK3B;GSTP…	8.88733	2.19e-119
GOBP_RESPONSE_TO_GROWTH_FACTOR	PDCD6;TOB1;FST;CIB1;CXCL13;COL1A1;CREB1;CRK;PARP1;MAPK14;CCN2;CTNNB1;CX3CR1;DCN;DDX5;DLX3;DLX5;AGT;DUSP6;AGTR2;EDN1;MEGF8;EGFR;EGR1;ERBB2;AKT1;FBN1;FGF1;FGF2;FGF9;FGFR2;DKK1;FOXO3;FLT1;SIRT1;FOS;FSHB;GALNT3;GATA3;GATA6;GREM1;MSTN;AMHR2;ANKRD1;PDCD4;ANGPT2;NR3C1;ANXA1;HAS1;HDAC1;HDAC2;HGF;HIF1A;NR4A1;HOXA13;HPGD;IGF1R;CCN1;RBPJ;IL1B;FASLG;IL4;CXCL8;IL10;IL12B;ILK;INSR;ITGA5;ITGB1;ITGB3;ITGB8;JUN;K…	13.6531	2.3e-119
GOBP_RESPONSE_TO_NITROGEN_COMPOUND	ADA;BCL2L11;ABCC9;CDK4;CDKN1B;NOD1;CARM1;CFTR;CHRM3;LRRK2;CCR7;CNR1;COL1A1;ADM;CREB1;CRHR1;CRHR2;CRK;PARP1;MAPK14;CSK;CCN2;CTNNB1;CYP1B1;CYP11A1;DNMT1;DNMT3A;AGRP;DRD2;AGT;AGTR1;AGTR2;EDN1;EDNRA;EGFR;EGR1;AHR;AHSG;AIF1;EPHB2;AKT1;EZH2;FBN1;FOXO1;FOXO3;PLCB1;SIRT1;FOS;FPR2;SH3BP4;MTOR;NR5A1;GABPA;PTPN22;GATA6;MSTN;GH1;GHRHR;GJA1;GJB2;GNRHR;GPER1;GSK3B;GSTM1;GSTM2;ANXA1;HDAC2;NR4A1;HPRT1;APEX1;BIRC…	10.1469	1.65e-118
GOBP_REGULATION_OF_ANATOMICAL_STRUCTURE_MORPHOGENESIS	ADA;PDCD6;DNM1L;UST;PLXNC1;PAK4;CDX1;SEMA3C;CIB1;OLFM4;CXCL13;PDLIM5;CFL1;PHB2;CTHRC1;LRRK2;ADM;CLDN4;CLDN3;CRABP2;CRK;CSF1;CSF1R;CTNNB1;CX3CR1;CYP1B1;DCN;AGT;AGTR2;EDN1;EGF;MEGF8;EPHB2;ERBB2;ESR1;ETS1;F2;F3;FBLN1;FGA;FGF1;FGF2;FGFR2;DKK1;PLXND1;FLT1;NEDD4L;FN1;SIRT1;LPAR3;GATA2;GATA3;GATA6;GREM1;GDNF;GJA1;FOXP1;ANGPT2;GSK3B;ANXA1;HCK;HGF;HIF1A;HLA-G;FOXA2;HOXA11;IL1A;IL1B;FASLG;IL6;CXCL8;CXCR2;A…	11.117	3.7e-118
GOBP_EPITHELIAL_CELL_PROLIFERATION	CDH3;PDCD6;CDK4;CDK6;CDKN1B;YAP1;FST;PHB2;OSR2;SGPP2;CPB2;CTNNB1;GPBAR1;ARX;DLX5;DRD2;AGTR1;EGF;EGFR;ERBB2;AKT1;ESR1;F3;FGF1;FGF2;FGF9;FGFR2;FLT1;SIRT1;FSHB;GATA2;GATA3;INTU;GLI1;ANG;ANGPT1;HGF;HIF1A;HMGB1;NR4A1;ID2;IGF1;APOE;IGFBP3;RBPJ;IHH;IL6;IL10;IL12B;AR;ITGB3;JUN;AREG;KDR;ARG1;HES5;LAMB1;LEP;ARNT;MIRLET7B;MIR10B;MIR126;MIR132;MIR181C;MIR200C;MIR21;TACSTD2;MIR22;MIR27B;MIR29C;MIR34A;SMAD3;MD…	18.1826	2.07e-114
GOBP_RESPONSE_TO_WOUNDING	CDH3;CDKN1A;MYL9;YAP1;HPSE;PHB2;CCR1;COL1A1;ADM;CPB2;CLDN4;CLDN3;CRK;MAPK14;CCN2;ADRA2B;CX3CR1;CYP1A1;DRD2;HBEGF;EDN1;EDNRA;AIF1;EPHB2;EPO;ERBB2;F2;F2R;F2RL1;F3;FBLN1;FGA;FGF1;FGF2;FGFR2;FN1;ALOX15;MTOR;GATA2;GLI1;GLI3;ANXA1;ANXA2;HIF1A;FOXA2;TNC;IGF1;APOE;IGF1R;CCN1;IL1A;IL6;AQP1;IL10;ILK;INHBA;ITGA2;ITGA5;ITGB1;ITGB3;JUN;KDR;KNG1;ARG1;RHOC;LOX;LYN;MIR17;MIR200B;MIR21;MIR34A;SMAD2;SMAD3;SMAD4;MD…	15.7703	2.32e-113
GOBP_LEUKOCYTE_DIFFERENTIATION	ADA;RASGRP1;CDK6;LILRB2;CEBPA;CCR9;LILRB1;FCRL3;CCR1;CCR7;CREB1;DOCK11;PARP1;MAPK14;CSF1;CSF1R;CSF2;CSF3;IL34;CTLA4;CTNNB1;EGR1;ERBB2;EZH2;F2RL1;FANCD2;FBN1;FOXO3;SIRT1;FOS;IL27;MTOR;FSHB;PTPN22;GATA2;GATA3;GBA;FOXP1;GLI3;TBX21;ANXA1;ANXA2;HLA-B;HLA-DRB1;HLA-G;HMGB1;IAPP;ID2;IFNA1;IFNA13;IFNG;RBPJ;IHH;IL1A;IL1B;IL2;IL2RA;IL4;IL6;IL7;IL7R;IL9;IL10;IL11;IL12B;IL12RB1;IL15;IL17A;IL18;INHA;INHBA;ITGB…	15.2918	2.15e-112
GOBP_ANIMAL_ORGAN_MORPHOGENESIS	BCL2L11;TSHZ1;YAP1;CDX1;FST;SEMA3C;CFTR;PHB2;CTHRC1;OSR2;LRRK2;COL1A1;ADM;CPB2;MAPK14;CSF1;CSF1R;CCN2;CTNNB1;DCN;DLX3;DLX5;AGT;AGTR2;S1PR1;EDN1;EDNRA;MEGF8;EGFR;EMX2;EPHB2;EPHB4;ESR1;FANCD2;FBN1;FGF1;FGF2;FGF9;FGFR2;ZHX2;DKK1;FOXO3;PLXND1;HEY1;FJX1;MTOR;NR5A2;NECTIN3;GATA2;GATA3;GATA6;GBA;GREM1;GDNF;ANKRD1;INTU;PDCD4;GLI1;GLI3;NR3C1;SLC40A1;HDAC1;HDAC2;HGF;HIF1A;HOXA11;HOXA13;HOXB4;TNC;ID2;CCN1;R…	10.2138	2.51e-112
GOBP_POSITIVE_REGULATION_OF_RNA_METABOLIC_PROCESS	SRA1;MIR543;MED16;TOB1;YAP1;CDX1;CARM1;CEBPA;CTCF;LILRB1;PPARGC1A;BRD8;CHUK;OSR2;COL1A1;CREB1;PARP1;MAPK14;CSF3;CTNNB1;DCN;DDX5;DLX3;DLX5;DRD2;AGT;AGTR2;S1PR1;EDN1;EGF;EGFR;EGR1;AHR;TET3;EPO;ERBB2;ERCC1;AKT1;ERCC6;ESR1;ESR2;ESRRB;ETS1;F2R;F2RL1;FGF1;FGF2;FGFR2;FOXM1;NCOA6;FOXO1;FOXO3;PLCB1;SIRT1;HEY1;FOS;NUP62;MTOR;FSHB;NR5A2;NR5A1;GABPA;GATA2;GATA3;GATA6;GREM1;MSTN;GDNF;FOXD3;ANKRD1;GLI1;GLI3;GP…	7.3757	2.72e-112
GOBP_ENZYME_LINKED_RECEPTOR_PROTEIN_SIGNALING_PATHWAY	CDH3;PDCD6;TOB1;CDK4;FST;AGR2;TXNIP;COL1A1;CRK;PARP1;MAPK14;CSF1;CSF1R;CCN2;CTNNB1;DCN;DDX5;DLX3;DLX5;DOK1;AGT;HBEGF;AGTR2;EGF;MEGF8;EGFR;EGR1;AHSG;EPHA3;EPHB2;EPHB4;ERBB2;AKT1;F3;FBN1;FGF1;FGF2;FGF9;FGFR2;DKK1;FOXO1;FLT1;PLCB1;SIRT1;FOS;NUP62;FSHB;GALNT3;GATA3;GATA6;GREM1;MSTN;AMH;GH1;AMHR2;GHRH;GHRHR;PDCD4;ANGPT1;ANGPT2;GPER1;GSK3B;HCK;HDAC1;HDAC2;HGF;HIF1A;HOXA13;HPGD;IGF1;IGF1R;IGFBP1;IGFBP3;…	10.417	1.34e-111
GOBP_CELLULAR_RESPONSE_TO_STRESS	MIR543;PDCD6;BCL2L11;RASGRP1;CDK6;CDKN1A;CDKN1B;CDKN2A;NOD1;NDRG1;YAP1;CEBPA;CIB1;AGR2;CFTR;PPARGC1A;BRD8;PHB2;UCN3;CHUK;LRRK2;CCR7;COMT;ADM;CRK;SIRPA;PARP1;MAPK14;CCN2;CTH;CTLA4;CTNNB1;CYP1B1;DAPK1;DDX5;DNMT3A;AGT;DUSP1;EDN1;EDNRA;EGFR;EGR1;AIF1;ENO1;EPO;ERCC1;ERCC2;AKT1;ERCC6;ALB;EZH2;F2RL1;FANCD2;FEN1;FGF1;FOXM1;NCOA6;FOXO1;FOXO3;AKR1B1;PLCB1;SIRT1;FOS;NUP62;ALOX15;MTOR;POLDIP2;PTPN22;GATA6;GB…	7.05674	1.72e-111
GOBP_TAXIS	KLRC4-KLRK1;DNM1L;PLXNC1;SEMA3C;CXCL13;CXCR6;CCR9;CCR1;CCR5;CCR7;CCR8;CRK;CRMP1;MAPK14;CSF1;CSF1R;IL34;CX3CR1;CYP19A1;DEFB4A;ARX;DLX5;DPP4;DPYSL2;HBEGF;DUSP1;AGTR1;S1PR1;EDN1;EDNRA;MEGF8;AIF1;EPHA3;EPHB2;EPHB4;ERBB2;F2RL1;F3;FGF1;FGF2;KLRK1;PLXND1;FLT1;FPR1;FPR2;DAPK2;GATA3;GREM1;MSTN;GDNF;GLI3;CXCR3;ANGPT1;ANGPT2;CXCL1;ANXA1;HGF;HMGB1;NR4A1;CCN1;IL1B;IL4;IL6;CXCL8;CXCR1;CXCR2;IL10;IL16;CXCL10;IT…	14.5929	1.65e-110
GOBP_CELL_CELL_SIGNALING	CDH3;ABCC4;LILRB2;YAP1;CXCL13;CFTR;LILRB1;UTS2;PRRT2;CHRM3;UCN3;CTHRC1;CLCN3;LRRK2;CCR1;CCR5;CNR1;COL1A1;ADM;CREB1;CRH;CRHR1;CRHR2;MAPK14;ADRA1A;CTNNB1;ADRA2B;CX3CR1;CYP19A1;ACE;DLX3;DLX5;DRD2;AGT;AGTR1;EDN1;EDNRA;EGF;EGFR;EGR1;EPHB2;AKT1;ESR2;EZH2;F2R;F2RL1;FGA;FGF2;FGF9;FGFR2;DKK1;FOXO1;FOXO3;PLCB1;LPAR3;FJX1;RNF19A;GATA3;GATA6;GREM1;GDNF;AMH;GHRH;GHRHR;GJA1;GJB2;RBMS3;GLI1;GLI3;GNRH1;GNRHR;GPE…	7.62446	6e-110
GOBP_REGULATION_OF_DEFENSE_RESPONSE	ADA;KLRC4-KLRK1;RASGRP1;ADAR;NOD1;CEBPA;CD226;LILRB1;LRRK2;CCR7;CNR1;CD200R1;CRK;SIRPA;PARP1;MAPK14;CYP19A1;ACE;DRD2;AGT;AGTR1;AHSG;EPHB2;ESR1;ETS1;F2RL1;FANCD2;KLRK1;FPR2;CADM1;ALOX15;IL27;NCR3;PTPN22;GATA3;GATA6;GBA;FOXP1;IL37;PDCD4;GPER1;GPX4;GSTP1;ANXA1;HCK;HGF;HLA-B;HLA-DRB1;HLA-G;HMGB1;BIRC2;BIRC3;TNC;IFIT1;IFNG;IGF1;APOE;IL1B;IL1R1;IL2;IL2RA;IL4;IL6;IL10;IL12B;IL12RB1;IL13;IL15;IL16;IL17A;…	13.3478	4.23e-108
GOBP_NEUROGENESIS	UST;PLXNC1;CDK6;PAK4;NDRG1;YAP1;CARM1;SEMA3C;CIB1;PDLIM5;CFL1;MMP24;CTHRC1;LRRK2;CNR1;ADM;CRABP2;CREB1;CRK;CRMP1;CSF1;CSF1R;CSK;IL34;CTNNB1;ADRA2B;CX3CR1;ACE;ARX;DLX3;DLX5;DNMT3A;DPYSL2;DRD2;AGT;S1PR1;EDN1;EDNRA;MEGF8;EMX2;EPHA3;EPHB2;EPHB4;EPO;NR2F6;ERBB2;ERCC2;AKT1;ERCC6;EZH2;F2;FGF2;FGFR2;FKBP4;ZHX2;KIFAP3;DKK1;FOXO3;PLXND1;ASTN2;NEDD4L;FN1;DICER1;HEY1;LPAR3;MTOR;CHD5;GATA2;GATA3;GBA;GDNF;TNFR…	7.53913	7.8e-108
GOBP_GROWTH	BCL2L11;CDK4;CDKN1A;CDKN1B;CDKN2A;PAK4;YAP1;SEMA3C;CIB1;AGR2;PDLIM5;AKAP13;ADM;CRABP2;CREB1;MAPK14;CSF1;ADRA1A;CTNNB1;CYP19A1;ARX;DPYSL2;DRD2;AGT;HBEGF;DUSP6;AGTR1;AGTR2;S1PR1;EDN1;EDNRA;MEGF8;EGFR;ENO1;ERBB2;ERCC1;ERCC2;AKT1;ERCC6;ESR1;ESR2;EXTL3;EZH2;F2;FGF1;FGF2;FGF9;FGFR2;FOXO3;PLCB1;NEDD4L;FN1;SIRT1;LPAR3;SH3BP4;MTOR;GATA3;GATA6;GREM1;MSTN;AMH;GH1;GHRH;GHRHR;GJA1;FOXP1;GLI1;GLI3;GSK3B;ANXA1;…	10.498	3.39e-104
GOBP_REGULATION_OF_TRANSFERASE_ACTIVITY	DNM1L;RASGRP1;CDKN1A;CDKN1B;CDKN2A;ADAR;CDKN3;CEBPA;CIB1;AKAP13;PHB2;CKS1B;LRRK2;CCR7;CSF1;CSF1R;CSK;IL34;ADRA1A;CTNNB1;ADRA2B;ACE;DRD2;AGT;HBEGF;DUSP1;AGTR1;EDN1;EGF;EGFR;EGR1;EPHA3;EPHB2;EPHB4;EPO;ERBB2;AKT1;ERCC6;EZH2;F2;FGF1;FGF2;FGFR2;DKK1;FLT1;SIRT1;NUP62;MTOR;PTPN22;GBA;GREM1;MSTN;GH1;PDCD4;ANG;ANGPT1;GSK3B;GSTP1;GTF2H1;HGF;HLA-DRB1;FOXA2;APOA2;IFNG;IGF1;APOE;IGF1R;CCN1;IL1B;IL2;IL4;IL12B;…	10.5022	1.09e-103
GOBP_POSITIVE_REGULATION_OF_RESPONSE_TO_EXTERNAL_STIMULUS	KLRC4-KLRK1;DNM1L;RASGRP1;NOD1;CEBPA;CXCL13;CD226;LRRK2;CCR1;CCR7;CNR1;CPB2;CSF1;CSF1R;IL34;CX3CR1;ACE;AGT;AGTR1;S1PR1;EDN1;MEGF8;AIF1;ETS1;F2;F2RL1;F3;FGF2;KLRK1;FPR2;DAPK2;CADM1;NCR3;MSTN;PDCD4;HCK;HLA-G;HMGB1;IFNG;IGF1R;IL1B;IL2;IL4;IL6;CXCL8;CXCR2;IL12B;IL15;IL16;IL17A;IL18;IDO1;CXCL10;ITGA2;USP17L2;KDR;KIR2DL4;ARG1;LGALS1;LGALS9;LTA;LYN;SH2D1A;MIR126;MIR142;MIR21;MIR22;SMAD3;MBL2;MDK;MET;MIF…	17.3493	1.82e-103
GOBP_LYMPHOCYTE_ACTIVATION	ADA;KLRC4-KLRK1;RASGRP1;CDK6;CDKN1A;LILRB2;CCR9;LILRB1;PHB2;FCRL3;CCR7;DOCK11;SIRPA;CSK;CTLA4;CTNNB1;CD55;DPP4;EGR1;AHR;AIF1;EPHB2;EPO;ERBB2;ERCC1;AKT1;EZH2;F2RL1;FANCD2;FCGR3A;KLRK1;FOXO3;CADM1;IL27;MTOR;NCR3;PTPN22;GATA3;GBA;FOXP1;TNFRSF21;GLI3;CD274;MSH6;TBX21;ANXA1;HLA-DPB1;HLA-DQB1;HLA-DRB1;HLA-G;HMGB1;HPRT1;HSPD1;ICAM1;ID2;IFNA1;IFNA13;IFNG;IGF1;RBPJ;IHH;IL1A;IL1B;IL2;IL2RA;IL2RB;IL4;IL6;IL…	11.1031	2.87e-103
GOBP_CELL_CELL_ADHESION	ADA;CDH3;KLRC4-KLRK1;RASGRP1;CDH15;LILRB2;PAK4;MYL9;CXCL13;PDLIM5;LILRB1;MMP24;CCR7;CD200R1;CLDN4;CLDN3;CLDN7;SIRPA;MAPK14;CSK;CTLA4;CTNNB1;CX3CR1;CYP1B1;CD55;DPP4;EGFR;AIF1;EPO;ERBB2;AKT1;ETS1;FGA;KLRK1;KIFAP3;FOXO3;ASTN2;FN1;CADM1;CADM2;NECTIN3;PTPN22;GATA3;TNFRSF21;GLI3;CD274;TMOD3;TBX21;ANXA1;ANXA2;HLA-DPB1;HLA-DQB1;HLA-DRB1;HLA-G;HMGB1;FOXA2;HSPD1;ICAM1;IFNG;IGF1;CCN1;IHH;IL1A;IL1B;IL1RAP;IL…	10.1601	3.46e-103
GOBP_POSITIVE_REGULATION_OF_MAPK_CASCADE	RASGRP1;NOD1;CIB1;AKAP13;PHB2;FCRL3;LRRK2;CCR1;CCR7;CRK;CSF1R;CSK;IL34;ADRA1A;CCN2;CTNNB1;ADRA2B;GPBAR1;DRD2;EDN1;EGF;EGFR;EPO;ERBB2;EZH2;F2R;F2RL1;FGA;FGF1;FGF2;FGFR2;DKK1;FLT1;PLCB1;LPAR3;FPR2;ALOX15;FSHR;PTPN22;GH1;ANGPT1;GPER1;HGF;HLA-DRB1;HMGB1;IAPP;ICAM1;IGF1;APOE;IGF1R;IGFBP3;IGFBP6;IL1A;IL1B;IL6;IL11;INHBA;INSR;AR;ITGB3;JUN;KDR;KISS1;LEP;LGALS9;LIF;MIRLET7B;MIR126;MIR21;MIR27B;KITLG;MIF;M…	16.224	1.92e-102
GOBP_REPRODUCTION	ADA;BCL2L11;CDKN1B;FST;CIB1;KHDRBS1;CFTR;PHB2;LRRK2;CNR1;ZFP42;ADM;CLDN4;CRH;CRHR1;PARP1;CSF1;PDIK1L;CTNNB1;ADRA2B;CYP1A1;CYP1B1;CYP17A1;CYP19A1;ACE;DNMT3A;AGRP;AGT;DUSP1;EDN1;EDNRA;EGR1;EPO;EPOR;ERCC1;AKT1;ESR1;FANCD2;FBLN1;FGF9;FGFR2;FKBP4;FOXO3;PLCB1;SIRT1;FOS;CADM1;MTOR;FSHB;FSHR;NR5A1;GALNT3;NECTIN3;GATA3;GATA6;MSTN;AMH;AMHR2;GHRHR;GJA1;GJB2;HPGDS;GLI1;GLI3;GNRH1;ANG;ANGPT2;GPX4;NR3C1;MSH6;D…	7.68768	4.71e-102
GOBP_POSITIVE_REGULATION_OF_CELL_ADHESION	ADA;KLRC4-KLRK1;RASGRP1;CDK6;LILRB2;CIB1;AGR2;OLFM4;CXCL13;LILRB1;CCR7;CRK;SIRPA;CSF1;CSK;CCDC80;CD55;DPP4;AIF1;EPO;ERBB2;AKT1;ETS1;FGA;KLRK1;KIFAP3;FOXO3;FN1;ALOX15;ABI3BP;POLDIP2;PTPN22;GATA3;GLI3;ANGPT1;CD274;GSK3B;ANXA1;HLA-DPB1;HLA-DQB1;HLA-DRB1;HLA-G;HMGB1;FOXA2;HSPD1;IFNG;IGF1;CCN1;IHH;IL1A;IL1B;IL2;IL2RA;IL4;IL6;IL7;IL7R;IL10;IL12B;IL12RB1;IL15;IL18;ILK;ITGA2;ITGA5;ITGAV;ITGB3;JAK1;KDR;LA…	16.5704	4.82e-102
GOBP_NEGATIVE_REGULATION_OF_GENE_EXPRESSION	CDKN2B-AS1;CDH3;MIR543;MIR1185-1;TOB1;CDKN1A;ADAR;YAP1;CTCF;LILRB1;FCRL3;LRRK2;CCR1;CCR7;CD200R1;CPB2;CLDN3;SIRPA;MAPK14;CSK;CCN2;CTNNB1;CX3CR1;DAPK1;ACE;DDX5;DNMT1;DNMT3A;EDN1;EGFR;EIF4EBP1;AIF1;ELAVL1;EPHB2;AKT1;ESR1;EZH2;F2;F2RL1;HOXA11-AS;FGF2;ZHX2;FN1;DICER1;SIRT1;PTPN22;GATA2;GATA3;GATA6;GBA;GDNF;FOXP1;IL37;TNFRSF21;PDCD4;RBMS3;ANG;ANGPT1;GPER1;CD274;GSK3B;GSTP1;DNMT3L;TBX21;ANXA1;HDAC1;HGF…	7.55305	6e-102
GOBP_RESPONSE_TO_MOLECULE_OF_BACTERIAL_ORIGIN	KLRC4-KLRK1;CDK4;LILRB2;CXCL13;LILRB1;CCR5;CCR7;CNR1;ADM;SIRPA;MAPK14;CSF1;CSF2;CSF3;CX3CR1;CYP1A1;CD55;ACE;DIO2;EDN1;EPHB2;EPO;AKT1;F2R;FGFR2;KLRK1;FOS;PTPN22;GJB2;ANKRD1;FOXP1;IL37;PDCD4;CD274;CXCL1;GSTP1;HCK;HDAC2;HMGB1;NR4A1;HPGD;TICAM2;IL1A;IL1B;FASLG;IL6;CXCL8;IL10;IL12B;IL13;IL18;IDO1;CXCL10;ARG1;LGALS9;LOXL1;LTA;LTF;LYN;MIR142;MIR17;MIR20A;MIR21;MAOB;MIF;CXCL9;MPO;MRC1;MIR342;NFKB1;NFKBIA…	21.3761	6.01e-102
GOBP_CELLULAR_RESPONSE_TO_HORMONE_STIMULUS	SRA1;BCL2L11;CDK4;YAP1;CARM1;BRD8;PHB2;UCN3;CRHR1;CRHR2;CRK;PARP1;CSF1;CSK;CYP1B1;CYP11A1;ACE;AKR1C1;AKR1C2;DDX5;AGRP;AGT;AGTR1;AGTR2;EDN1;EDNRA;AHSG;AIF1;AKT1;ESR1;ESR2;ESRRB;FBN1;FKBP4;FOXO1;FOXO3;PLCB1;SIRT1;FOS;FSHR;NR5A2;NR5A1;GATA6;MSTN;GH1;GHRHR;GJB2;FOXP1;GNRHR;GPER1;NR3C1;GSK3B;GTF2H1;ANXA1;HDAC1;ACACA;NR4A1;APEX1;IGF1R;IGFBP1;IGFBP7;IL1B;AQP1;INHBA;INSR;AR;ITGB3;JAK1;ARG1;LEP;LEPR;LHB;L…	13.8745	9.51e-101
GOBP_REGULATION_OF_HEMOPOIESIS	ADA;RASGRP1;CDK6;LILRB2;CEBPA;CIB1;LILRB1;FCRL3;H4-16;CCR1;CREB1;MAPK14;CSF1;CSF3;IL34;CTLA4;CTNNB1;ERBB2;ETS1;FANCD2;FBN1;FOXO3;FOS;IL27;MTOR;FSHB;GABPA;GATA2;GATA3;FOXP1;GLI3;TBX21;ANXA1;HIF1A;HLA-B;HLA-DRB1;HLA-G;HMGB1;IAPP;ID2;IFNG;IHH;IL2;IL2RA;IL4;IL7;IL7R;IL10;IL12B;IL12RB1;IL15;IL17A;IL18;INHA;INHBA;LGALS1;LGALS3;LGALS9;LIF;LOX;ARNT;LTF;LYN;MIR145;MIR21;MDK;KITLG;MMP14;MYB;MYC;NFKBIA;TNFR…	18.3406	2.18e-99
GOBP_POSITIVE_REGULATION_OF_CYTOKINE_PRODUCTION	KLRC4-KLRK1;RASGRP1;LILRB2;NOD1;CD226;HPSE;LILRB1;CHUK;LRRK2;CCR7;MAPK14;CSF1R;CSF2;CYP1B1;CD55;DRD2;AGT;EGR1;AIF1;EPHB2;F2R;F2RL1;F3;FCGR3A;KLRK1;PLCB1;SIRT1;CADM1;IL27;PTPN22;GATA3;GATA6;FOXP1;CD274;TBX21;ANXA1;HDAC2;HGF;HIF1A;HK1;HLA-DPB1;HLA-G;HMGB1;HSPD1;APOA2;IFNG;IFNGR1;IL1A;IL1B;IL1R1;IL1RAP;IL2;IL4;IL6;IL7;IL9;IL10;IL12B;IL12RB1;IL13;IL15;IL16;IL17A;IL18;IDO1;KIR2DL4;LEP;LGALS9;LTA;ARNT;…	15.8863	5.25e-98
GOBP_GLAND_DEVELOPMENT	ADA;BCL2L11;CDKN1B;CEBPA;SEMA3C;MTCO2P12;PHB2;CPB2;CREB1;CRH;CRHR1;CSF1;CSF1R;CTNNB1;CYP1A1;CYP1B1;CYP19A1;DRD2;EDN1;EDNRA;EGF;EGFR;AKT1;ESR1;EZH2;FGF1;FGF2;FGFR2;FKBP4;PLXND1;CADM1;NR5A1;GATA2;GATA3;GATA6;GHRH;GHRHR;GLI1;GLI3;NR3C1;ANXA1;HGF;HIF1A;HOXA10;HOXA11;HOXA13;TNC;ID2;RBPJ;IHH;IL6;IL10;INSR;AR;ITGA2;JUN;AREG;ARG1;SMAD2;SMAD3;SMAD4;MDK;MET;MMP2;ATM;NFKB1;NME1;NOTCH1;NOTCH4;OXTR;PCNA;PDGFA…	17.1519	6.2e-98
GOBP_ERK1_AND_ERK2_CASCADE	RASGRP1;NOD1;CIB1;PHB2;CCR1;CCR7;SIRPA;CSF1R;CSK;ADRA1A;CCN2;GPBAR1;DRD2;AGT;DUSP6;EDN1;EGF;EGFR;EPHB2;EPO;ERBB2;F2R;F2RL1;FBLN1;FGA;FGF1;FGF2;FGFR2;FN1;FPR2;ALOX15;FSHR;PTPN22;ANGPT1;GPER1;GSTP1;HLA-DRB1;HMGB1;ICAM1;IGF1;APOE;CCN1;IL1A;IL1B;INHBA;ITGAV;ITGB3;JUN;KDR;LGALS9;LIF;LYN;MIRLET7B;MIR126;MIR145;MIR200C;MIR21;MIR27B;SMAD4;MIF;MYC;NOTCH1;NTRK2;NTRK3;OPRM1;OXTR;P2RY6;PDGFA;PDGFRA;PDGFRB;PL…	21.1387	1.5e-97
GOBP_POSITIVE_REGULATION_OF_TRANSPORT	CDH3;DNM1L;CIB1;KHDRBS1;CETP;CFTR;PRRT2;UCN3;LRRK2;CCR1;CNR1;CPB2;CREB1;CRH;SIRPA;MAPK14;CYP19A1;DRD2;AGT;EDN1;EDNRA;EGF;AHSG;EPHB2;ERBB2;AKT1;F2;F2R;F2RL1;FGA;NEDD4L;SIRT1;FPR2;GATA2;GREM1;GDNF;GH1;GHRH;GHRHR;ANKRD1;GLI3;ANG;ANGPT1;GPER1;GSK3B;GSTM2;ANXA1;ANXA2;HIF1A;HLA-DRB1;APOA2;IFNG;IGF1;APOE;IL1A;IL1B;FASLG;IL2RB;IL4;AQP1;IL13;IL15;INHA;INHBA;CXCL10;INSR;ITGA2;ITGAM;ITGB1;KCNQ1;KISS1;LEP;LG…	10.0432	9.08e-97
GOBP_POSITIVE_REGULATION_OF_CELL_DEATH	BCL2L11;DNM1L;CDKN1A;CDKN1B;CDKN2A;NOD1;TXNIP;MTCO2P12;LILRB1;LRRK2;CNR1;ADM;PARP1;CCN2;CTLA4;CTNNB1;CYP1B1;DAPK1;ACE;DNMT3A;AGT;DUSP6;AGTR2;EGR1;DKK1;FOXO1;FOXO3;SIRT1;FOS;DAPK2;GATA6;ANKRD1;FOXP1;PDCD4;GPER1;NR3C1;CD274;PDIA3;GSK3B;ANXA1;HLA-G;HMGB1;NR4A1;HOXA13;HP;HPGD;HSPD1;IAPP;IFNG;IGFBP3;CCN1;FAS;FASLG;IL6;CXCR2;IL10;IL12B;IDO1;INHBA;ITGAM;ITGB1;JUN;KNG1;LEP;LGALS1;LGALS9;LTA;LYN;MIR132;MI…	13.1006	1.41e-96
GOBP_LEUKOCYTE_MIGRATION	ADA;KLRC4-KLRK1;DNM1L;OLFM4;CXCL13;CCR1;CCR5;CCR7;CD200R1;CRK;SIRPA;CSF1;CSF1R;IL34;CX3CR1;CYP19A1;DPP4;DUSP1;S1PR1;EDN1;AIF1;AKT1;F2RL1;KLRK1;FLT1;PLCB1;FPR2;DAPK2;GATA3;GBA;GREM1;MSTN;CXCR3;CXCL1;TBX21;ANXA1;HCK;HMGB1;ICAM1;IL1A;IL1B;IL1R1;IL4;IL6;CXCL8;CXCR1;CXCR2;IL10;IL16;IL17A;CXCL10;ITGA2;ITGB1;ITGB3;RHOG;LEP;LGALS3;LGALS9;LYN;MDK;KITLG;MIF;CXCL9;MMP2;MMP9;MMP14;CD200;NINJ1;SERPINE1;IL23A;…	18.3179	1.23e-95
GOBP_REGULATION_OF_CELL_ACTIVATION	ADA;KLRC4-KLRK1;RASGRP1;CDKN1A;LILRB2;CEBPA;CD226;LILRB1;FCRL3;LRRK2;CCR7;CNR1;SIRPA;CSK;CCN2;CTLA4;CTNNB1;CD55;DPP4;AHR;AIF1;EPHB2;EPO;ERBB2;AKT1;F2;F2RL1;FANCD2;FCGR3A;KLRK1;FOXO3;FN1;IL27;PTPN22;GATA2;GATA3;TNFRSF21;GLI3;GPER1;CD274;TBX21;ANXA1;HLA-DPB1;HLA-DQB1;HLA-DRB1;HLA-G;HMGB1;HSPD1;ID2;IFNG;IGF1;APOE;IHH;IL1A;IL1B;IL2;IL2RA;IL4;IL6;IL7;IL7R;IL10;IL12B;IL12RB1;IL13;IL15;IL18;IDO1;INHA;IN…	11.6012	1.28e-95
GOBP_RESPONSE_TO_PEPTIDE	BCL2L11;CDK4;CDKN1B;NOD1;COL1A1;ADM;CREB1;CRHR1;CRHR2;CRK;PARP1;MAPK14;CSK;CCN2;CYP1B1;CYP11A1;AGRP;AGT;AGTR1;AGTR2;EDN1;EDNRA;EGR1;AHSG;EPHB2;AKT1;FBN1;FOXO1;FOXO3;PLCB1;SIRT1;FOS;FPR2;MTOR;NR5A1;PTPN22;MSTN;GH1;GHRHR;GJA1;GJB2;GNRHR;GPER1;GSK3B;ANXA1;NR4A1;APEX1;HSD11B2;ICAM1;IGF1;IGF1R;IGFBP1;IL1B;IL10;INHBA;INSR;ITGB3;JAK1;AREG;KCNQ1;ARG1;LEP;LHCGR;LYN;MIR143;MIR145;MIR195;MIR200A;MIR200C;MAS…	14.3729	4.11e-92
GOBP_RESPONSE_TO_BACTERIUM	KLRC4-KLRK1;CDK4;LILRB2;NOD1;CXCL13;LILRB1;CCR5;CCR7;CNR1;ADM;CLDN3;CRP;SIRPA;MAPK14;CSF1;CSF2;CSF3;CCDC80;CX3CR1;CYP1A1;CD55;ACE;DEFB4A;CFD;DIO2;EDN1;EPHB2;EPO;AKT1;F2;F2R;F2RL1;FGA;FGFR2;FKBP5;KLRK1;FOS;FPR2;IL27;PTPN22;GJB2;ANKRD1;FOXP1;IL37;PDCD4;ANG;CD274;CXCL1;GSTP1;HCK;HDAC2;HLA-B;HLA-DRB1;HMGB1;NR4A1;HP;HPGD;RBPJ;TICAM2;IL1A;IL1B;FASLG;IL6;IL7R;CXCL8;AQP1;IL10;IL12B;IL13;IL17A;IL18;IDO1;C…	10.6201	5.58e-92
GOBP_CYTOKINE_MEDIATED_SIGNALING_PATHWAY	LILRB2;ADAR;YAP1;CEBPA;CIB1;CXCL13;CXCR6;CCR9;LILRB1;CHUK;CCR1;CCR5;CCR7;CCR8;CSF1;CSF1R;CSF2;CSF3;IL34;CX3CR1;DOK1;EDN1;EGR1;EPO;EPOR;AKT1;F2RL1;F3;FOXO3;PLCB1;SIRT1;IL37;CXCR3;ANGPT1;CXCL1;GSTP1;HCK;HIF1A;BIRC2;BIRC3;IFI27;IFNA1;IFNA13;IFNG;IFNGR1;TICAM2;FAS;IL1A;IL1B;IL1R1;IL1RAP;IL1RN;IL2RA;IL2RB;IL6;IL7;IL7R;CXCL8;CXCR1;CXCR2;IL12B;IL12RB1;IL15;IL17A;IL18;ILK;CXCL10;JAK1;ARG1;LEP;LEPR;LYN;MI…	14.6312	6.15e-91
GOBP_REGULATION_OF_IMMUNE_RESPONSE	ADA;KLRC4-KLRK1;RASGRP1;LILRB2;ADAR;NOD1;CXCL13;KHDRBS1;CD226;LILRB1;PHB2;FCRL3;CCR7;CNR1;CD200R1;CRK;PARP1;MAPK14;CSK;CTLA4;CD55;CFD;DRD2;AHR;EPHB2;ESR1;F2RL1;FCGR3A;FCGR3B;KLRK1;SIRT1;FPR1;FPR2;CADM1;ALOX15;IL27;NCR3;PTPN22;GATA2;GATA3;GATA6;FOXP1;TNFRSF21;CD274;TBX21;ANXA1;HCK;HLA-B;HLA-DPB1;HLA-DQB1;HLA-DRB1;HLA-G;HMGB1;BIRC2;BIRC3;HSPD1;CFI;IFNG;APOE;TICAM2;IL1B;IL1R1;IL2;IL4;IL6;IL7R;IL10;I…	9.37495	1.02e-89
GOBP_REGULATION_OF_INFLAMMATORY_RESPONSE	ADA;CEBPA;LRRK2;CCR7;CNR1;CD200R1;SIRPA;MAPK14;CYP19A1;ACE;AGT;AGTR1;AHSG;ESR1;ETS1;FANCD2;FPR2;ALOX15;GATA3;GBA;FOXP1;IL37;PDCD4;GPER1;GPX4;GSTP1;ANXA1;HCK;HGF;HLA-DRB1;BIRC2;BIRC3;TNC;IFNG;IGF1;APOE;IL1B;IL1R1;IL2;IL2RA;IL4;IL6;IL10;IL12B;IL13;IL15;IL16;IL18;IDO1;ITGA2;LGALS1;LTA;LYN;MIR126;MIR141;MIR142;MIR145;MIR181C;MIR195;MIR20A;MIR204;MIR205;MIR21;MIR22;MIR30C2;MIR31;SMAD3;MAS1;MDK;MMP3;MM…	16.4911	3.64e-89
GOBP_POSITIVE_REGULATION_OF_TRANSCRIPTION_BY_RNA_POLYMERASE_II	MED16;YAP1;CDX1;CEBPA;LILRB1;PPARGC1A;BRD8;CHUK;OSR2;CREB1;PARP1;MAPK14;CSF3;CTNNB1;DCN;DLX3;DLX5;DRD2;S1PR1;EDN1;EGFR;EGR1;AHR;TET3;ERCC1;AKT1;ERCC6;ESR1;ESRRB;ETS1;F2RL1;FGF1;FGF2;FGFR2;FOXM1;NCOA6;FOXO1;FOXO3;SIRT1;HEY1;FOS;FSHB;NR5A2;NR5A1;GABPA;GATA2;GATA3;GATA6;GREM1;GDNF;FOXD3;GLI1;GLI3;GPER1;MED4;NR3C1;TBX21;SLC40A1;ANXA2;HDAC1;HDAC2;HGF;HIF1A;HMGB1;HMGA1;NR4A1;FOXA2;HOXA10;HOXA13;HOXB4;A…	7.77502	5.44e-89
GOBP_TISSUE_MORPHOGENESIS	YAP1;FST;SEMA3C;PHB2;CTHRC1;ADM;CSF1;CSF1R;CTNNB1;DLX3;AGT;HBEGF;AGTR2;S1PR1;EDN1;EDNRA;EGF;MEGF8;EGFR;ESR1;FGF1;FGF2;FGFR2;DKK1;PLXND1;ASTN2;HEY1;MTOR;GATA3;GREM1;GDNF;GJA1;ANKRD1;FOXP1;INTU;GLI3;NR3C1;HGF;HIF1A;HOXA11;HOXA13;HOXB4;TNC;CCN1;RBPJ;IHH;CXCR2;IL10;ILK;INHBA;CXCL10;AR;ITGA2;ITGA5;ITGB1;ITGB3;AREG;KDR;KRAS;HES5;RHOC;LIF;MIR143;MIR145;MIR195;MIR200C;MIR21;TACSTD2;SMAD2;SMAD3;SMAD4;MDK;…	11.8987	8.69e-89
GOBP_NEGATIVE_REGULATION_OF_IMMUNE_SYSTEM_PROCESS	ADA;KLRC4-KLRK1;CDK6;LILRB2;ADAR;CEBPA;LILRB1;FCRL3;CNR1;CD200R1;CRK;PARP1;MAPK14;CTLA4;CTNNB1;CX3CR1;CYP19A1;CD55;DPP4;DRD2;DUSP1;AHR;ERBB2;AKT1;FBN1;KLRK1;PLCB1;ALOX15;PTPN22;GATA2;GREM1;TNFRSF21;GLI3;ANGPT1;GPER1;CD274;TBX21;ANXA1;HCK;HLA-B;HLA-DRB1;HLA-G;HMGB1;APOA2;IAPP;ID2;IHH;IL2;IL2RA;IL4;IL7R;IL10;IL12B;IDO1;INHA;INHBA;KIR2DL4;KLRC1;ARG1;LGALS3;LGALS9;LTF;LYN;SH2D1A;MIR181C;MIR21;MIR34A;…	15.42	1.7e-88
GOBP_NEGATIVE_REGULATION_OF_BIOSYNTHETIC_PROCESS	MIR543;TOB1;CDK6;CDKN1A;CDKN1B;CDKN2A;YAP1;FST;CEBPA;TXNIP;KHDRBS1;CTCF;PHB2;OSR2;CREB1;SIRPA;PARP1;CSF2;CTNNB1;DAPK1;DDX5;ARX;DNMT1;DNMT3A;DNMT3B;HBEGF;EDN1;EGR1;AHR;EIF4EBP1;ENO1;EPO;NR2F6;ESR1;ESR2;EZH2;FGF9;FGFR2;ZHX2;DKK1;FOXM1;FOXO1;FOXO3;PLCB1;DICER1;SIRT1;HEY1;GABPA;CHD5;GATA2;GATA3;GATA6;GREM1;FOXD3;ANKRD1;FOXP1;PDCD4;GLI3;ANG;GPER1;NR3C1;GSK3B;GSTP1;DNMT3L;TBX21;HDAC1;HDAC2;HMGB1;HMGA1;…	6.46663	3.51e-88
GOBP_CELL_CHEMOTAXIS	KLRC4-KLRK1;DNM1L;CXCL13;CXCR6;CCR9;CCR1;CCR5;CCR7;CCR8;CRK;CSF1;CSF1R;IL34;CX3CR1;CYP19A1;DEFB4A;DPP4;HBEGF;DUSP1;AGTR1;S1PR1;EDN1;AIF1;F2RL1;FGF1;FGF2;KLRK1;FLT1;FPR2;DAPK2;GREM1;MSTN;CXCR3;CXCL1;ANXA1;HGF;HMGB1;NR4A1;IL1B;IL4;IL6;CXCL8;CXCR1;CXCR2;IL10;IL16;CXCL10;KDR;RHOG;LGALS3;LGALS9;LOX;LYN;MIR34A;MDK;MET;MIF;CXCL9;MMP2;NINJ1;NOTCH1;SERPINE1;PDGFRA;IL23A;PDGFRB;PF4;PF4V1;PGF;PIK3CD;PIK3CG;…	20.5285	8.24e-88
GOBP_MONONUCLEAR_CELL_DIFFERENTIATION	ADA;RASGRP1;CDK6;LILRB2;CCR9;LILRB1;FCRL3;CCR7;DOCK11;CSF1;CSF1R;CSF2;IL34;CTLA4;CTNNB1;EGR1;ERBB2;EZH2;F2RL1;FANCD2;FOXO3;FOS;IL27;MTOR;PTPN22;GATA3;GBA;FOXP1;GLI3;TBX21;ANXA1;HLA-B;HLA-DRB1;HLA-G;HMGB1;ID2;IFNA1;IFNA13;IFNG;RBPJ;IHH;IL1A;IL1B;IL2;IL2RA;IL4;IL6;IL7;IL7R;IL9;IL10;IL11;IL12B;IL12RB1;IL15;IL18;INHA;INHBA;ITGB1;ITGB8;JUN;KLRC1;LEP;LEPR;LGALS1;LGALS3;LGALS9;LYN;MIR21;MDK;MMP14;MSH2;M…	14.6538	1.09e-87
GOBP_AMEBOIDAL_TYPE_CELL_MIGRATION	PDCD6;SEMA3C;CIB1;CXCL13;MAPK14;CYP1B1;DCN;DPP4;AGT;HBEGF;AGTR2;EDN1;EDNRA;EGF;MEGF8;EPHB4;AKT1;ETS1;FGF1;FGF2;PLXND1;FN1;SIRT1;CAPN7;MTOR;GATA2;GATA3;GREM1;GDNF;GJA1;FOXP1;ANGPT1;ANGPT2;ANXA1;HAS1;HIF1A;HMGB1;NR4A1;IFNG;APOE;IL4;AQP1;ILK;ITGA2;ITGB1;ITGB3;JUN;KDR;MIR10B;MIR126;MIR132;MIR143;MIR145;MIR20A;MIR200A;MIR200B;MIR200C;MIR204;MIR21;MIR210;TACSTD2;MIR22;MIR27B;MIR29C;MIR30A;MIR31;MECP2;M…	14.138	1.85e-87
GOBP_POSITIVE_REGULATION_OF_TRANSFERASE_ACTIVITY	RASGRP1;CDKN1A;CDKN1B;CIB1;AKAP13;PHB2;CKS1B;LRRK2;CCR7;CSF1;CSF1R;CSK;IL34;ADRA1A;CTNNB1;ADRA2B;ACE;DRD2;AGT;HBEGF;AGTR1;EDN1;EGF;EGFR;EGR1;EPHA3;EPHB2;EPHB4;EPO;ERBB2;AKT1;ERCC6;EZH2;F2;FGF1;FGF2;FGFR2;DKK1;FLT1;SIRT1;MTOR;GREM1;GH1;ANG;ANGPT1;HLA-DRB1;APOA2;IFNG;IGF1;APOE;IGF1R;CCN1;IL1B;IL2;IL4;IL12B;IL18;INSR;ITGB3;AREG;KDR;LEP;LTF;LYN;MIR143;MIR21;MAS1;MET;KITLG;MIF;MNAT1;CD200;MST1R;MYC;NT…	12.2153	6.92e-86
GOBP_GENERATION_OF_NEURONS	UST;PLXNC1;CDK6;PAK4;CARM1;SEMA3C;CIB1;PDLIM5;CFL1;CTHRC1;LRRK2;CNR1;ADM;CRABP2;CREB1;CRK;CRMP1;CSF1R;CTNNB1;ADRA2B;CX3CR1;ARX;DLX3;DLX5;DNMT3A;DPYSL2;DRD2;AGT;S1PR1;EDN1;EDNRA;MEGF8;EMX2;EPHA3;EPHB2;EPHB4;EPO;NR2F6;ERBB2;ERCC2;AKT1;ERCC6;EZH2;FGF2;FGFR2;FKBP4;ZHX2;KIFAP3;DKK1;FOXO3;PLXND1;ASTN2;NEDD4L;FN1;DICER1;HEY1;LPAR3;CHD5;GATA2;GATA3;GBA;GDNF;TNFRSF21;GLI3;GNRH1;MYLIP;GSK3B;HDAC1;HDAC2;HGF…	6.90468	1.05e-85
GOBP_CELLULAR_RESPONSE_TO_NITROGEN_COMPOUND	BCL2L11;CDK4;NOD1;CFTR;CHRM3;LRRK2;COL1A1;CRHR1;CRHR2;CRK;PARP1;CSK;CTNNB1;CYP1B1;CYP11A1;DNMT1;DNMT3A;DRD2;AGT;AGTR1;AGTR2;EDN1;EDNRA;EGFR;EGR1;AHR;AHSG;AIF1;EPHB2;AKT1;EZH2;FBN1;FOXO1;FOXO3;PLCB1;SIRT1;FOS;FPR2;SH3BP4;MTOR;GABPA;PTPN22;MSTN;GH1;GHRHR;GJA1;GJB2;GNRHR;GPER1;GSK3B;GSTM2;HDAC2;NR4A1;APEX1;ICAM1;IFIT1;IGF1;IGF1R;IGFBP1;IL1B;AQP1;INHBA;INSR;AQP9;ITGB3;JAK1;JUN;KCNQ1;ARG1;LEP;LHCGR;LY…	10.6568	1.3e-85
GOBP_LEUKOCYTE_PROLIFERATION	ADA;RASGRP1;CDKN1A;LILRB2;LILRB1;FCRL3;CRP;CSF1;CSF1R;CSF2;IL34;CTLA4;CTNNB1;CD55;ACE;AHR;AIF1;EPHB2;EPO;ERBB2;F2RL1;FCGR3A;CADM1;IL27;PTPN22;GBA;GREM1;TNFRSF21;CD274;GSTP1;ANXA1;HLA-DPB1;HLA-DRB1;HLA-G;HMGB1;HPRT1;HSPD1;IFNA1;IFNA13;IGF1;IHH;IL1A;IL1B;IL2;IL2RA;IL4;IL6;IL7;IL7R;IL9;IL10;IL12B;IL12RB1;IL13;IL15;IL18;IDO1;ARG1;LEP;LGALS3;LGALS9;LYN;MIR181C;MIR21;KITLG;MIF;ATM;FOXP3;IL23A;ENPP3;PIK…	18.4729	1.5e-85
GOBP_REGULATION_OF_PROTEIN_KINASE_ACTIVITY	RASGRP1;CDKN1A;CDKN1B;CDKN2A;ADAR;CDKN3;CEBPA;CIB1;AKAP13;PHB2;CKS1B;LRRK2;CCR7;CSF1;CSF1R;CSK;IL34;ADRA1A;ADRA2B;ACE;DRD2;AGT;HBEGF;DUSP1;EDN1;EGF;EGFR;EGR1;EPHB2;EPO;ERBB2;AKT1;ERCC6;EZH2;FGF1;FGF2;DKK1;FLT1;SIRT1;NUP62;MTOR;PTPN22;GBA;GREM1;GH1;PDCD4;ANG;ANGPT1;GSTP1;GTF2H1;HGF;IFNG;IGF1;APOE;CCN1;IL1B;IL4;IL12B;IL18;INSR;ITGB3;AREG;LEP;LTF;LYN;MIR143;MIR20A;MIR21;MIR34A;MAS1;KITLG;MIF;MNAT1;M…	11.0192	5.02e-85
GOBP_EMBRYO_DEVELOPMENT	ADA;PDCD6;BCL2L11;TSHZ1;YAP1;CDX1;CEBPA;SEMA3C;CFL1;CTHRC1;OSR2;COL1A1;ADM;CRABP2;CSF2;CTNNB1;ACE;DLX3;DLX5;DNMT1;DNMT3A;DUSP1;DUSP2;EDN1;EDNRA;MEGF8;EGFR;TET3;EPHB2;ERCC1;ERCC2;AKT1;ESRRB;FBN1;FGF2;FGF9;FGFR2;DKK1;FLT1;PLCB1;FN1;HEY1;NR5A2;GABPA;GATA2;GATA3;GATA6;GREM1;GDNF;GJA1;FOXD3;INTU;GLI1;GLI3;ANGPT1;DNMT3L;HDAC1;HDAC2;HIF1A;FOXA2;HOXA10;HOXA11;HOXA13;HOXB4;HSD17B2;ID2;IGF1;CCN1;RBPJ;IHH;I…	7.89302	9.58e-85
GOBP_REGULATION_OF_CELL_CELL_ADHESION	ADA;KLRC4-KLRK1;RASGRP1;LILRB2;CXCL13;LILRB1;CCR7;SIRPA;MAPK14;CSK;CTLA4;CD55;DPP4;AIF1;EPO;ERBB2;AKT1;ETS1;FGA;KLRK1;KIFAP3;FOXO3;PTPN22;GATA3;TNFRSF21;GLI3;CD274;TBX21;ANXA1;HLA-DPB1;HLA-DQB1;HLA-DRB1;HLA-G;HMGB1;FOXA2;HSPD1;IFNG;IGF1;IHH;IL1A;IL1B;IL1RN;IL2;IL2RA;IL4;IL6;IL7;IL7R;IL10;IL12B;IL12RB1;IL15;IL18;IDO1;JAK1;ARG1;LEP;LGALS1;LGALS3;LGALS9;LYN;MIR141;MIR181C;MIR21;MIR31;EPCAM;MDK;KITLG…	13.8053	1.72e-84
GOBP_POSITIVE_REGULATION_OF_KINASE_ACTIVITY	RASGRP1;CDKN1A;CDKN1B;CIB1;AKAP13;PHB2;CKS1B;LRRK2;CCR7;CSF1;CSF1R;CSK;IL34;ADRA1A;ADRA2B;ACE;DRD2;AGT;HBEGF;EDN1;EGF;EGFR;EGR1;EPHA3;EPHB2;EPHB4;EPO;ERBB2;AKT1;ERCC6;EZH2;F2;FGF1;FGF2;FGFR2;DKK1;FLT1;SIRT1;MTOR;GREM1;GH1;ANG;ANGPT1;HLA-DRB1;IFNG;IGF1;IGF1R;CCN1;IL1B;IL2;IL4;IL12B;IL18;INSR;ITGB3;AREG;KDR;LEP;LTF;LYN;MIR143;MIR21;MAS1;MET;KITLG;MIF;MNAT1;MST1R;NTF3;NTRK2;NTRK3;PAK1;PDGFA;PDGFRA;I…	13.5445	1.11e-83
GOBP_CENTRAL_NERVOUS_SYSTEM_DEVELOPMENT	BCL2L11;ABCB6;CDK6;LRRK2;CLDN3;CREB1;CRK;CSF1R;CSK;VCAN;IL34;CTNNB1;CX3CR1;ACE;ARX;DLX5;DPYSL2;DRD2;AGTR2;S1PR1;EGF;EGFR;AIF1;EMX2;EPHB2;EPOR;ERBB2;ERCC2;EZH2;F2;FANCD2;FGF2;FGF9;FGFR2;DKK1;NCOA6;FOXO3;PLCB1;CADM1;MTOR;CADM2;CHD5;GATA2;GBA;GDNF;GHRH;GHRHR;FOXP1;INTU;TNFRSF21;GLI1;GLI3;GSK3B;GSTP1;H2AX;HDAC1;HDAC2;HIF1A;HPRT1;HSD3B1;HSD3B2;ID2;IFNG;IFNGR1;IGF1R;RBPJ;IL1B;IL6;CXCR2;AQP1;INHBA;ITGAM…	8.10286	3.34e-83
GOBP_SECRETION	ADA;DNM1L;RASGRP1;ABCC4;AGR2;MTCO2P12;CFTR;LILRB1;PRRT2;CHRM3;UCN3;LRRK2;CCR1;CNR1;ADM;CPB2;CREB1;CRH;CRHR1;CSF2;ADRA1A;CCN2;ADRA2B;CYP19A1;ACE;DRD2;AGT;AGTR1;EDN1;EGF;F2R;F2RL1;FCGR3A;FGA;FOXO1;GATA2;GATA3;GDNF;GHRH;GHRHR;GJA1;ANKRD1;GNRHR;ANG;GPER1;ANK1;GSK3B;ANXA1;ANXA2;HCK;HIF1A;HLA-DRB1;NR4A1;FOXA2;IFNG;IGF1;APOE;IL1A;IL1B;IL1RN;IL4;IL6;AQP1;IL11;IL12B;IL13;AQP5;INHA;INHBA;AQP9;ITGAM;KCNQ1;K…	8.63451	3.9e-83
GOBP_RESPONSE_TO_STEROID_HORMONE	BCL2L11;YAP1;CARM1;TXNIP;PHB2;UCN3;COL1A1;ADM;CLDN4;PARP1;CCN2;CYP1B1;ACE;DDX5;EDN1;AIF1;EPO;ESR1;ESR2;ESRRB;FKBP4;FOXO3;SIRT1;FOS;GBA;MSTN;GHRHR;GJB2;FOXP1;GNRH1;GPER1;NR3C1;ANXA1;HDAC1;HSD3B1;HSD3B2;HSD11B2;APOA2;IGF1R;IGFBP7;IL1RN;IL6;AQP1;IL10;AR;AREG;ARG1;LOX;MAOB;MDK;NR3C2;NOTCH1;NTRK3;OXTR;PAK1;IL22;PAPPA;PCNA;SERPINF1;PGR;PIK3CA;ERRFI1;PPARA;UGT1A1;MED1;TRERF1;VPS11;PTGER2;PTGS2;CCND1;BCL…	18.3838	3.91e-83
GOBP_MYELOID_CELL_DIFFERENTIATION	CDK6;ADAR;CEBPA;CIB1;LILRB1;H4-16;CCR1;CCR7;CREB1;PARP1;MAPK14;CSF1;CSF1R;CSF2;CSF3;IL34;CTNNB1;EPO;ERCC2;ETS1;F2RL1;FBN1;NCOA6;FOXO3;SIRT1;FOS;MTOR;FSHB;GABPA;GATA2;GATA3;GBA;FOXP1;TMOD3;ANXA2;HIF1A;HLA-DRB1;IAPP;ID2;IFNG;RBPJ;IL4;IL11;IL12B;IL15;IL17A;INHA;INHBA;ITGB8;JUN;KCNQ1;LBR;LGALS9;LIF;LOX;ARNT;LTF;LYN;MIR145;KITLG;MMP9;MYB;MYC;NFKBIA;TNFRSF11B;IL23A;KLF13;PF4;PIK3CD;TREM2;PPARG;MED1;H4C…	15.7443	3.91e-83
GOBP_REGULATION_OF_VASCULATURE_DEVELOPMENT	PDCD6;PAK4;CXCL13;ADM;CTNNB1;CX3CR1;CYP1B1;DCN;AGT;ERBB2;ETS1;F3;FGF1;FGF2;PLXND1;FLT1;SIRT1;GATA2;GATA6;GREM1;ANGPT2;HGF;HIF1A;HLA-G;IL1A;IL1B;FASLG;IL6;CXCL8;CXCR2;AQP1;IL10;CXCL10;ITGA5;ITGB1;ITGB3;ITGB8;JAK1;KDR;LEP;MIRLET7B;MIR126;MIR132;MIR143;MIR145;MIR17;MIR20A;MIR200B;MIR21;MIR210;MIR214;MIR27B;MIR29C;MIR30A;MIR30C1;MIR31;MIR34A;MDK;MECP2;NFE2L2;NINJ1;NOS3;MIR375;MIR378A;SERPINE1;SERPINF…	17.5467	6.16e-83
GOBP_REGULATION_OF_HYDROLASE_ACTIVITY	PDCD6;BCL2L11;KLRC4-KLRK1;RASGRP1;PLXNC1;NOD1;CXCL13;PHB2;FCRL3;LRRK2;CCR7;CLDN4;CLDN3;CRK;DOCK11;ADRA1A;CCN2;DAPK1;DRD2;AGT;AGTR1;AGTR2;S1PR1;EDNRA;EGFR;AHSG;EPHA3;ERBB2;AKT1;ESR1;EZH2;F2R;F2RL1;F3;FBLN1;FGF2;FGFR2;KLRK1;PLXND1;FLT1;FN1;SIRT1;SH3BP4;MTOR;POLDIP2;ANG;GPER1;GSK3B;ANXA1;ANXA2;HDAC1;HGF;HMGB1;NR4A1;BIRC2;BIRC3;BIRC5;HSPD1;APOA2;IFNG;CCN1;FAS;FASLG;IL9;AQP1;ITGA2;ITGB1;USP17L2;KNG1;R…	8.25017	6.93e-83
GOBP_APOPTOTIC_SIGNALING_PATHWAY	PDCD6;BCL2L11;DNM1L;CDKN1A;YAP1;CIB1;LRRK2;PARP1;CSF2;CTH;CTNNB1;CX3CR1;CYP1B1;DAPK1;DDX5;AGT;AGTR2;ENO1;EPO;AKT1;ERCC6;FGA;FOXO3;SIRT1;DAPK2;GDNF;GPER1;PDIA3;GSK3B;GSTP1;MSH6;HDAC1;HGF;HIF1A;ICAM1;IFI27;IFNG;IGF1;FAS;IL1A;IL1B;IL2;FASLG;IL4;IL7;IL9;INHBA;AR;ITGAM;ITGAV;LGALS3;MIR132;MIR17;MIR21;MIR210;MIR27B;SMAD3;MDM2;KITLG;MIF;MLH1;MMP9;MSH2;MUC1;MYC;ATM;NFE2L2;NGF;NGFR;NOS3;SERPINE1;PF4;PIK3C…	11.6994	1.02e-82
GOBP_T_CELL_ACTIVATION	ADA;KLRC4-KLRK1;RASGRP1;CDK6;LILRB2;CCR9;LILRB1;CCR7;SIRPA;CSK;CTLA4;CTNNB1;CD55;DPP4;EGR1;AIF1;EPO;ERBB2;AKT1;F2RL1;FANCD2;KLRK1;FOXO3;CADM1;IL27;MTOR;PTPN22;GATA3;GBA;FOXP1;TNFRSF21;GLI3;CD274;TBX21;ANXA1;HLA-DPB1;HLA-DQB1;HLA-DRB1;HLA-G;HMGB1;HSPD1;ICAM1;IFNA1;IFNA13;IFNG;IGF1;IHH;IL1A;IL1B;IL2;IL2RA;IL4;IL6;IL7;IL7R;IL10;IL12B;IL12RB1;IL15;IL18;IDO1;KLRC1;ARG1;LEP;LEPR;LGALS1;LGALS3;LGALS9;LY…	12.4767	1.25e-82
GOBP_NEGATIVE_REGULATION_OF_MOLECULAR_FUNCTION	KLRC4-KLRK1;CDKN1A;CDKN1B;CDKN2A;ADAR;CEBPA;CIB1;TXNIP;PHB2;CHUK;LRRK2;CNR1;CRHR1;CRMP1;CSK;CYP1B1;ACE;DRD2;AGT;DUSP1;AGTR2;AHSG;EPHB2;EPO;AKT1;ESR1;ESR2;EZH2;KLRK1;DKK1;NEDD4L;SIRT1;HEY1;NUP62;SH3BP4;PTPN22;GBA;MSTN;PDCD4;CCDC22;REM1;GSK3B;GSTM2;GSTP1;ANXA1;ANXA2;HDAC2;HGF;NR4A1;FOXA2;HP;BIRC2;BIRC3;BIRC5;APOA2;ID2;IFIT1;IFNG;APOE;IL1B;IL7;IL9;AQP1;IL10;IL13;ITGAV;ITGB3;JUN;USP17L2;KNG1;STMN1;LE…	7.57618	2.78e-82
GOBP_WOUND_HEALING	CDH3;CDKN1A;MYL9;YAP1;HPSE;COL1A1;CPB2;CLDN4;CLDN3;CRK;MAPK14;ADRA2B;HBEGF;EDN1;EPHB2;ERBB2;F2;F2R;F2RL1;F3;FBLN1;FGA;FGF1;FGF2;FGFR2;FN1;ALOX15;MTOR;GATA2;GLI3;ANXA1;ANXA2;HIF1A;FOXA2;IGF1;APOE;CCN1;IL1A;IL6;AQP1;ILK;ITGA2;ITGA5;ITGB1;ITGB3;KDR;KNG1;RHOC;LOX;LYN;MIR17;MIR200B;MIR34A;SMAD2;SMAD3;SMAD4;MMP12;NFE2L2;NOS3;NOTCH4;OPRM1;SERPINE1;SERPINB2;PAK1;PDGFA;PDGFRA;PDGFRB;PF4;PF4V1;SERPINA1;PIK…	14.5442	4.57e-82
GOBP_DEVELOPMENTAL_GROWTH	BCL2L11;CDK4;CDKN1A;CDKN1B;YAP1;SEMA3C;AGR2;PDLIM5;AKAP13;ADM;CRABP2;CREB1;MAPK14;CSF1;ADRA1A;CTNNB1;CYP19A1;ARX;DPYSL2;DRD2;AGT;DUSP6;S1PR1;EDN1;EDNRA;MEGF8;ERCC1;ERCC2;AKT1;ERCC6;ESR1;EZH2;FGF1;FGF2;FGF9;FGFR2;FOXO3;PLCB1;NEDD4L;FN1;LPAR3;MTOR;GATA3;GATA6;MSTN;AMH;GH1;GHRH;GHRHR;FOXP1;GLI1;GLI3;GSK3B;ANXA1;HOXA11;IGF1;APOE;IGFBP1;RBPJ;IHH;IL7;INSR;AR;ITGB1;AREG;L1CAM;LEP;LEPR;LIMK1;MIR195;MIR20…	10.9503	5.97e-82
GOBP_NEGATIVE_REGULATION_OF_RESPONSE_TO_EXTERNAL_STIMULUS	ADA;KLRC4-KLRK1;ADAR;SEMA3C;CXCL13;LILRB1;CD200R1;CPB2;CLDN3;CRK;SIRPA;PARP1;MAPK14;CYP19A1;DPP4;DRD2;DUSP1;EDN1;AIF1;F2;FGA;FGF2;KLRK1;FPR2;GATA3;GBA;GREM1;ANGPT2;GPER1;GSTP1;ANXA2;HCK;HGF;HLA-B;HLA-DRB1;HLA-G;IGF1;APOE;IL2;IL2RA;IL4;IL10;IL12B;IL13;KIR2DL4;KLRC1;KNG1;ARG1;LEP;LGALS9;LTF;LYN;MIR126;MIR141;MIR142;MIR145;MIR181C;MIR195;MIR20A;MIR200B;MIR204;MIR205;MIR21;MIR30C2;MIR31;MIR34A;SMAD3;…	14.7256	6.81e-82
GOBP_RESPONSE_TO_OXYGEN_LEVELS	ADA;CDKN1B;NDRG1;PHB2;UCN3;COL1A1;ADM;CLDN3;CCN2;CYP1A1;ACE;DNMT3A;DPP4;DRD2;EDN1;EDNRA;EGR1;ENO1;EPO;AKT1;FOXO1;FOXO3;SIRT1;FOS;MTOR;GATA6;ANG;ANGPT2;HDAC2;HIF1A;BIRC2;HSD11B2;RBPJ;FAS;IL1A;AQP1;ITGA2;MALAT1;LEP;LTA;ARNT;MIR126;MIR145;MIR17;MIR21;MIR210;MIR214;MIR34A;SMAD3;SMAD4;MDM2;MECP2;MMP2;MMP14;MYC;ATM;NFE2L2;NOS1;NOS2;NOTCH1;OXTR;P2RX3;PDGFA;PDGFRB;PGF;PIK3CB;PLAU;TREM2;PPARA;PPARG;PTEN;P…	18.1634	3.21e-81
GOBP_TRANSMEMBRANE_RECEPTOR_PROTEIN_TYROSINE_KINASE_SIGNALING_PATHWAY	CDH3;PDCD6;CDK4;AGR2;TXNIP;COL1A1;CRK;MAPK14;CSF1;CSF1R;CCN2;CTNNB1;DCN;DOK1;AGT;HBEGF;AGTR2;EGF;EGFR;AHSG;EPHA3;EPHB2;EPHB4;ERBB2;AKT1;F3;FGF1;FGF2;FGF9;FGFR2;FOXO1;FLT1;PLCB1;SIRT1;NUP62;GALNT3;GATA3;GREM1;MSTN;GH1;GHRH;GHRHR;ANGPT1;ANGPT2;GPER1;GSK3B;HCK;HGF;HIF1A;IGF1;IGF1R;IGFBP1;IGFBP3;IGFBP6;RBPJ;IL1B;FASLG;IL12B;INSR;AR;ITGA5;ITGB3;JAK1;AREG;KDR;STMN1;LEP;LOX;ARNT;LYN;MIR10B;MIR195;MIR200…	10.8781	1.61e-80
GOBP_POSITIVE_REGULATION_OF_CELL_ACTIVATION	ADA;KLRC4-KLRK1;RASGRP1;CDKN1A;LILRB2;CEBPA;CD226;LILRB1;FCRL3;LRRK2;CCR7;SIRPA;CSK;CCN2;CD55;DPP4;AIF1;EPHB2;EPO;AKT1;F2RL1;FCGR3A;KLRK1;FOXO3;PTPN22;GATA2;GATA3;GLI3;CD274;TBX21;ANXA1;HLA-DPB1;HLA-DQB1;HLA-DRB1;HLA-G;HMGB1;HSPD1;IFNG;IGF1;IHH;IL1A;IL1B;IL2;IL2RA;IL4;IL6;IL7;IL7R;IL10;IL12B;IL12RB1;IL13;IL15;IL18;ITGAM;LEP;LGALS1;LGALS9;LYN;MIR142;MIR145;MIR21;MDK;KITLG;MIF;MLH1;MMP14;MSH2;MYB;F…	13.9014	2.96e-80
GOBP_DEFENSE_RESPONSE_TO_OTHER_ORGANISM	KLRC4-KLRK1;ABCC9;RASGRP1;ADAR;NOD1;CXCL13;CD226;LILRB1;PHB2;CHUK;CRK;CRP;SIRPA;PARP1;CSF1;CSF1R;IL34;CX3CR1;CD55;DAPK1;DEFB4A;CFD;DRD2;EDN1;AIF1;F2;F2RL1;FCGR3A;FGA;KLRK1;FPR2;CADM1;IL27;NCR3;PTPN22;GATA3;GATA6;FOXP1;ANG;GPER1;CXCL1;ANXA1;HCK;HK1;HLA-B;HLA-C;HLA-G;HMGB1;HP;BIRC2;BIRC3;CFI;IFI27;IFIT1;IFNA1;IFNA13;IFNG;IFNGR1;APOE;RBPJ;TICAM2;IL1B;IL1RAP;FASLG;IL4;IL6;IL7R;CXCL8;AQP1;IL10;IL12B;I…	7.42283	3.18e-80
GOBP_REGULATION_OF_GROWTH	BCL2L11;CDK4;CDKN1A;CDKN1B;CDKN2A;PAK4;YAP1;SEMA3C;CIB1;AGR2;CRABP2;CREB1;MAPK14;CSF1;ARX;DPYSL2;DRD2;AGT;HBEGF;DUSP6;AGTR1;AGTR2;EDN1;MEGF8;EGFR;ENO1;ERBB2;AKT1;ESR2;EXTL3;F2;FGF2;FGF9;FGFR2;PLCB1;NEDD4L;FN1;SIRT1;LPAR3;SH3BP4;MTOR;GATA6;GREM1;MSTN;GH1;GHRH;GHRHR;GJA1;FOXP1;GLI1;GSK3B;HIF1A;TNC;IGF1;APOE;IGFBP1;IGFBP3;IGFBP7;RBPJ;IHH;IL2;IL7;IL9;INHBA;INSR;AR;L1CAM;LEP;LIMK1;MIR200B;MIR204;SMAD3…	11.0771	3.32e-80
GOBP_LEUKOCYTE_CELL_CELL_ADHESION	ADA;KLRC4-KLRK1;RASGRP1;LILRB2;LILRB1;CCR7;SIRPA;CSK;CTLA4;CX3CR1;CD55;DPP4;AIF1;EPO;ERBB2;AKT1;ETS1;KLRK1;FOXO3;PTPN22;GATA3;TNFRSF21;GLI3;CD274;TBX21;ANXA1;HLA-DPB1;HLA-DQB1;HLA-DRB1;HLA-G;HMGB1;HSPD1;ICAM1;IFNG;IGF1;IHH;IL1A;IL1B;IL2;IL2RA;IL4;IL6;IL7;IL7R;IL10;IL12B;IL12RB1;IL15;IL18;IDO1;ITGA5;ITGB1;ARG1;LEP;LGALS1;LGALS3;LGALS9;LYN;MIR141;MIR181C;MIR21;MIR31;MDK;KITLG;MYB;NT5E;FOXP3;IL23A;P…	15.0715	4.2e-80
GOBP_RESPONSE_TO_XENOBIOTIC_STIMULUS	NAT2;CDH3;CDK4;ABCC4;CDKN1B;SEMA3C;TXNIP;SCN11A;CYP2R1;COL1A1;CPB2;CREB1;ADRA1A;CTNNB1;CYP1A1;CYP1A2;CYP1B1;CYP2B6;CYP2C19;CYP3A4;CYP26A1;ACE;AKR1C1;DNMT3A;DRD2;DUSP6;EDN1;AHR;EMX2;FOXO3;FMO2;FOS;GATA3;GATA6;AMH;ANKRD1;GSTM1;GSTM2;GSTP1;HDAC2;APEX1;HSD11B2;APOA2;IL1B;IL10;INHBA;ITGA2;ITGB3;JUN;KCNQ1;ARG1;LHCGR;LOX;LTA;LYN;MAOB;MAS1;MDK;MMP2;MYC;NFE2L2;NOS1;NOS2;OGG1;TNFRSF11B;OXTR;PCNA;PDGFA;PGF;…	14.538	4.67e-80
GOBP_PEPTIDYL_AMINO_ACID_MODIFICATION	CARM1;CTCF;PPARGC1A;BRD8;CHUK;LRRK2;MAPK14;CSF1R;CSF2;CSF3;CSK;IL34;ADRA1A;CTH;CTNNB1;DCN;ACE;DNMT1;DNMT3B;AGT;HBEGF;EGF;EGFR;EGR1;TET3;EPHA3;EPHB2;EPHB4;EPO;ERBB2;AKT1;ERCC6;EZH2;FGFR2;FKBP4;FKBP5;DKK1;NCOA6;FLT1;SIRT1;MTOR;GALNT3;CHD5;GATA2;GATA3;GREM1;GH1;ANGPT1;GSK3B;HCK;HDAC2;HGF;APOA2;IFNA1;IFNA13;IFNG;IGF1;IGF1R;IL2;IL4;IL6;IL7;IL9;IL11;IL12B;IL13;IL15;IL18;ILK;INSR;ITGA5;ITGB3;JAK1;AREG;K…	7.0227	9.85e-80
GOBP_REGULATION_OF_LYMPHOCYTE_ACTIVATION	ADA;KLRC4-KLRK1;RASGRP1;CDKN1A;LILRB2;LILRB1;FCRL3;CCR7;SIRPA;CSK;CTLA4;CTNNB1;CD55;DPP4;AHR;AIF1;EPHB2;EPO;ERBB2;AKT1;FANCD2;FCGR3A;KLRK1;FOXO3;IL27;PTPN22;GATA3;TNFRSF21;GLI3;CD274;TBX21;ANXA1;HLA-DPB1;HLA-DQB1;HLA-DRB1;HLA-G;HMGB1;HSPD1;ID2;IFNG;IGF1;IHH;IL1A;IL1B;IL2;IL2RA;IL4;IL6;IL7;IL7R;IL10;IL12B;IL12RB1;IL13;IL15;IL18;IDO1;INHA;INHBA;KLRC1;ARG1;LEP;LGALS1;LGALS3;LGALS9;LYN;MIR181C;MIR21;…	11.7247	1.04e-78
GOBP_MORPHOGENESIS_OF_AN_EPITHELIUM	YAP1;FST;SEMA3C;PHB2;CTHRC1;ADM;CSF1;CSF1R;CTNNB1;DLX3;AGT;HBEGF;AGTR2;EDN1;EDNRA;EGF;MEGF8;EGFR;ESR1;FGF1;FGF2;FGFR2;DKK1;PLXND1;ASTN2;MTOR;GATA3;GREM1;GDNF;GJA1;FOXP1;INTU;GLI3;NR3C1;HGF;HIF1A;HOXA11;HOXA13;HOXB4;TNC;CCN1;RBPJ;IHH;CXCR2;IL10;ILK;CXCL10;AR;ITGA5;ITGB1;AREG;KDR;KRAS;HES5;RHOC;LIF;MIR21;TACSTD2;SMAD3;SMAD4;MDK;MET;MMP2;MMP12;MMP14;MYC;NGFR;NOTCH1;NOTCH4;PAK1;PAX2;PDGFA;PGR;PIK3CD;…	12.3624	1.36e-78
GOBP_IMMUNE_EFFECTOR_PROCESS	ADA;KLRC4-KLRK1;RASGRP1;NOD1;CD226;LILRB1;PHB2;FCRL3;CRK;DOCK11;CRP;CX3CR1;CD55;ACE;CFD;AHR;EPHB2;ERCC1;F2;F2RL1;FCGR3A;KLRK1;SIRT1;CADM1;IL27;MTOR;NCR3;PTPN22;GATA2;GATA3;FOXP1;ANGPT1;MSH6;TBX21;ANXA1;HCK;HK1;HLA-B;HLA-DPB1;HLA-DQB1;HLA-DRB1;HLA-G;HMGB1;HPRT1;HSPD1;APOA2;ICAM1;CFI;IFNA1;IFNA13;IFNG;IL1B;IL1R1;IL2;IL4;IL6;IL7R;IL9;IL10;IL12B;IL12RB1;IL13;IL17A;IL18;ITGAM;USP17L2;KIR2DL4;KIR3DL1;K…	10.1162	3.33e-78
GOBP_NEGATIVE_REGULATION_OF_PROTEIN_METABOLIC_PROCESS	MIR543;TOB1;CDKN1A;CDKN1B;LILRB2;CDKN2A;ADAR;CEBPA;CIB1;LRRK2;CPB2;SIRPA;CTNNB1;DAPK1;DNMT1;DNMT3B;DRD2;AGT;HBEGF;DUSP1;DUSP6;EDN1;EGFR;AHSG;EIF4EBP1;EPHB2;AKT1;F2;FBLN1;DKK1;SIRT1;NUP62;PTPN22;GBA;GREM1;PDCD4;ANG;ANGPT1;GSK3B;GSTP1;ANXA2;HDAC2;HGF;NR4A1;BIRC2;BIRC3;BIRC5;IAPP;IFNG;IGF1;APOE;IGFBP3;IL1B;IL2;IL9;AQP1;IL10;EIF3E;ITGAV;ITGB3;JUN;USP17L2;KNG1;LGALS3;LIMK1;LPA;LTF;LYN;MIRLET7B;MIR100;…	7.36892	2.67e-77
GOBP_HEART_DEVELOPMENT	CDKN1A;CDKN1B;YAP1;SEMA3C;PDLIM5;AKAP13;ADM;CREB1;MAPK14;ADRA1A;CTNNB1;ACE;AGT;DUSP6;S1PR1;EDN1;EDNRA;MEGF8;EGFR;EPHB4;EPOR;ERBB2;FBN1;FGF2;FGF9;FGFR2;DKK1;NCOA6;PLXND1;FN1;HEY1;MTOR;GATA3;GATA6;GREM1;GJA1;ANKRD1;FOXP1;CACYBP;PDCD4;GLI1;GLI3;GPER1;HIF1A;HOXA13;ID2;IGF1;IGF1R;CCN1;RBPJ;IHH;IL1A;ILK;INHBA;INSR;ITGB1;JUN;KCNQ1;KDR;LOX;MIR145;MIR17;MIR195;MIR20A;MIR200B;MIR204;MIR21;SMAD2;SMAD3;SMAD4…	10.8975	1.12e-76
GOBP_POSITIVE_REGULATION_OF_CELLULAR_COMPONENT_ORGANIZATION	BCL2L11;DNM1L;PLXNC1;CDKN1B;CXCL13;PPARGC1A;PRRT2;LRRK2;CCR7;CNR1;CPB2;CLDN3;CRABP2;DOCK11;MAPK14;CSF2;CSF3;CCN2;CTNNB1;DCN;DNMT1;DRD2;AGT;EDN1;EGF;MEGF8;EPHA3;EPHB2;EPO;ERCC1;ESR1;EZH2;F2RL1;FEN1;PLXND1;PLCB1;NEDD4L;FN1;LPAR3;NUP62;ALOX15;MTOR;LMOD1;POLDIP2;GATA2;GBA;GREM1;MSTN;GH1;ANGPT1;GPER1;GSK3B;ANXA1;ANXA2;HCK;HGF;HIF1A;HOXA13;IFNG;IGF1;APOE;IGF1R;IL1A;IL1B;IL1RAP;FASLG;IL4;IL6;IL17A;INSR;…	7.66406	1.54e-76
GOBP_TISSUE_MIGRATION	PDCD6;CIB1;CXCL13;MAPK14;CYP1B1;DCN;DPP4;AGT;HBEGF;AGTR2;EDN1;EGF;EPHB4;AKT1;ETS1;FGF1;FGF2;PLXND1;SIRT1;CAPN7;MTOR;GATA2;GATA3;GREM1;FOXP1;ANGPT1;ANGPT2;ANXA1;HIF1A;HMGB1;NR4A1;IFNG;APOE;IL4;ITGA2;ITGB1;ITGB3;JUN;KDR;MIR10B;MIR126;MIR132;MIR143;MIR20A;MIR200A;MIR200B;MIR200C;MIR204;MIR21;MIR210;TACSTD2;MIR22;MIR27B;MIR29C;MIR30A;MIR31;MECP2;MET;KITLG;MMP9;MIR135B;MIR342;NFE2L2;NOS3;NOTCH1;SERPIN…	15.3955	2e-75
GOBP_CELLULAR_RESPONSE_TO_ORGANIC_CYCLIC_COMPOUND	BCL2L11;CDK4;CDKN1B;PAK4;YAP1;CARM1;CEBPA;CFTR;CHRM3;PHB2;LRRK2;COL1A1;CREB1;PARP1;CTNNB1;GPBAR1;CYP1A1;CYP1B1;ACE;DDX5;DNMT1;DNMT3A;DRD2;EDN1;EGFR;EGR1;AHR;AIF1;ESR1;ESR2;ESRRB;EZH2;FKBP4;FOXO3;PLCB1;SIRT1;GABPA;MSTN;GHRHR;GJB2;FOXP1;GPER1;NR3C1;GSK3B;GSTM2;ANXA1;HDAC1;HDAC2;APEX1;IFIT1;IGF1R;IL1B;AQP1;IL10;IL15;IL18;INHBA;AQP9;AR;ITGA2;KCNQ1;ARG1;LEP;MIR21;NR3C2;MMP2;MIR342;NFKB1;OPRM1;P2RX3;P2…	11.0857	3.91e-75
GOBP_REGULATION_OF_CELL_DEVELOPMENT	PLXNC1;YAP1;SEMA3C;CIB1;OLFM4;LILRB1;LRRK2;CRABP2;CRK;IL34;CTNNB1;CX3CR1;ACE;DRD2;MEGF8;EPHB2;AKT1;EZH2;F2;FBLN1;FBN1;FGA;FGF2;KIFAP3;PLXND1;PLCB1;FN1;DICER1;HEY1;LPAR3;MTOR;GLI3;GPER1;GSK3B;ANXA2;HDAC1;HDAC2;HIF1A;HOXA11;ID2;IFNG;IGF1;IL1A;IL1B;IL6;ILK;ITGB1;ITGB3;KRAS;HES5;L1CAM;LIF;LIMK1;LTA;LTF;LYN;MIR142;MIR181C;TACSTD2;SMAD4;MAP2;MDK;MECP2;MME;NGF;NOTCH1;NTRK2;NTRK3;OPRM1;PAEP;SERPINF1;TREM…	12.0389	4.49e-75
GOBP_MUSCLE_CELL_PROLIFERATION	CDKN1A;CDKN1B;YAP1;PPARGC1A;MAPK14;CTNNB1;DNMT1;AGT;HBEGF;S1PR1;EDN1;AIF1;AKT1;FGF2;FGF9;FGFR2;FOS;POLDIP2;GATA6;MSTN;GJA1;FOXP1;PDCD4;GLI1;ANG;ANGPT1;GPER1;HDAC1;HGF;HPGD;ID2;IFNG;IGF1;APOE;IGF1R;IGFBP3;RBPJ;IL6;IL10;IL12B;IL13;IL15;IL18;ITGA2;ITGB3;JUN;HES5;MIR143;MIR145;MIR17;MIR20A;MIR200B;MIR204;MIR21;MIR214;MIR27B;MIR34A;MMP2;MMP9;MNAT1;MIR135B;NOS3;NOTCH1;P2RY6;PDGFRB;PIK3CA;PPARG;PTEN;PTG…	22.1107	5.01e-75
GOBP_POSITIVE_REGULATION_OF_ERK1_AND_ERK2_CASCADE	RASGRP1;NOD1;CIB1;PHB2;CCR1;CCR7;CSF1R;ADRA1A;CCN2;GPBAR1;DRD2;EGFR;EPO;F2R;F2RL1;FGA;FGF1;FGF2;FGFR2;FPR2;ALOX15;FSHR;PTPN22;ANGPT1;GPER1;HLA-DRB1;HMGB1;ICAM1;IGF1;APOE;IL1A;INHBA;ITGB3;JUN;KDR;LGALS9;MIRLET7B;MIR126;MIR21;MIR27B;MIF;NOTCH1;NTRK2;NTRK3;OPRM1;P2RY6;PDGFA;PDGFRA;PDGFRB;PLA2G2A;TREM2;PRKCA;MAPK3;MAP2K1;MAP2K7;ACKR3;PTEN;PTPRC;ACTA2;CCL1;CCL2;CCL5;CCL11;CCL14;CCL16;CCL17;CCL19;CCL21…	24.0396	6.51e-75
GOBP_REGULATION_OF_LEUKOCYTE_PROLIFERATION	ADA;CDKN1A;LILRB2;LILRB1;FCRL3;CRP;CSF1;CSF1R;CSF2;IL34;CTLA4;CTNNB1;CD55;AHR;AIF1;EPHB2;EPO;ERBB2;FCGR3A;IL27;PTPN22;GREM1;TNFRSF21;CD274;GSTP1;ANXA1;HLA-DPB1;HLA-DRB1;HLA-G;HMGB1;IGF1;IHH;IL1A;IL1B;IL2;IL2RA;IL4;IL6;IL7;IL10;IL12B;IL12RB1;IL13;IL15;IL18;IDO1;ARG1;LEP;LGALS3;LGALS9;LYN;MIR181C;MIR21;KITLG;MIF;ATM;FOXP3;IL23A;ENPP3;MAPK1;MAPK3;PRLR;PTEN;PTPRC;IL21;BCL2;BCL2L1;BCL6;CCL5;CCL19;SDC4…	19.8569	1.1e-72
GOBP_REPRODUCTIVE_SYSTEM_DEVELOPMENT	BCL2L11;CDKN1B;FST;ZFP42;CTNNB1;CYP1B1;CYP19A1;ACE;ERCC1;ESR1;FGF9;FGFR2;FKBP4;FOXO3;SIRT1;FSHB;FSHR;NR5A1;GATA3;GATA6;AMH;AMHR2;GLI1;GLI3;GNRH1;ANG;ANXA1;HOXA10;HOXA11;HOXA13;HSD17B3;TNC;IL1A;INHA;INHBA;INSR;AR;KDR;LEP;LHB;LHCGR;SMAD4;MAS1;KITLG;MMP2;MMP14;MSH2;ATM;NOS3;NOTCH1;PDGFA;PDGFRA;PDGFRB;SERPINF1;PGR;WNT4;AXL;PRLR;RETN;PTEN;BAX;CCND1;BCL2;REN;BCL2L1;SDC1;SFRP1;SFRP2;BMP4;BMP7;BMPR1B;SLI…	17.4212	1.86e-72
GOBP_REGULATION_OF_LEUKOCYTE_DIFFERENTIATION	ADA;RASGRP1;CDK6;LILRB2;LILRB1;FCRL3;CCR1;CREB1;CSF1;IL34;CTLA4;CTNNB1;ERBB2;FANCD2;FBN1;FOXO3;FOS;IL27;MTOR;FSHB;GATA2;GATA3;FOXP1;GLI3;TBX21;ANXA1;HLA-B;HLA-DRB1;HLA-G;HMGB1;IAPP;ID2;IFNG;IHH;IL2;IL2RA;IL4;IL7;IL7R;IL10;IL12B;IL12RB1;IL15;IL17A;IL18;INHA;INHBA;LGALS1;LGALS3;LGALS9;LIF;LTF;LYN;MIR145;MIR21;MDK;KITLG;MMP14;MYB;MYC;TNFRSF11B;FOXP3;IL23A;PF4;TREM2;PRKCA;AXL;PTPRC;RB1;ACTB;BCL6;CCL1…	16.9862	2.23e-72
GOBP_NEGATIVE_REGULATION_OF_NUCLEOBASE_CONTAINING_COMPOUND_METABOLIC_PROCESS	TOB1;CDK6;CDKN1A;CDKN1B;CDKN2A;YAP1;FST;CEBPA;TXNIP;KHDRBS1;CTCF;PHB2;OSR2;CREB1;PARP1;MAPK14;CSF2;CTNNB1;DDX5;ARX;DNMT1;DNMT3A;DNMT3B;EDN1;EGR1;AHR;ELAVL1;ENO1;EPO;NR2F6;ERCC1;ERCC6;ESR1;ESR2;EZH2;FGF9;FGFR2;ZHX2;DKK1;FOXM1;FOXO1;FOXO3;PLCB1;DICER1;SIRT1;HEY1;GABPA;CHD5;GATA2;GATA3;GATA6;GREM1;GDNF;FOXD3;ANKRD1;FOXP1;PDCD4;GLI3;NR3C1;MSH6;DNMT3L;TBX21;HDAC1;HDAC2;HMGB1;HMGA1;HOXB4;APEX1;BIRC5;ID…	5.92597	6.89e-72
GOBP_POSITIVE_REGULATION_OF_EPITHELIAL_CELL_PROLIFERATION	CDH3;PDCD6;YAP1;OSR2;CTNNB1;GPBAR1;DLX5;AGTR1;EGF;EGFR;ERBB2;AKT1;F3;FGF1;FGF2;FGF9;FGFR2;SIRT1;GATA2;ANG;HIF1A;HMGB1;NR4A1;IGF1;RBPJ;IHH;IL10;AR;ITGB3;JUN;AREG;KDR;ARG1;LAMB1;ARNT;MIRLET7B;MIR10B;MIR126;MIR132;MIR21;MIR27B;MDK;MMP12;MIR135B;MYC;NME1;NOTCH1;NRAS;PAX2;PGF;PIK3CD;MED1;PRKCA;MYDGF;HTRA1;MIR503;PTN;CCND1;CCL11;CXCL12;SFRP1;BMP4;SOX9;STAT3;ADAM17;TACR1;BTK;TEK;TGFBR1;TNF;TWIST1;VEGFA;…	22.9859	3.51e-71
GOBP_EPITHELIAL_CELL_DIFFERENTIATION	CDH3;CDK6;CDKN1B;YAP1;FST;CEBPA;AGR2;TXNIP;HPSE;CLDN3;CREB1;CTNNB1;CYP1A1;AKR1C1;AKR1C2;ARX;DLX3;DLX5;S1PR1;EDNRA;ERCC2;AKT1;ESR1;EZH2;F2RL1;FGF2;FGFR2;AKR1B1;PLCB1;HEY1;NR5A2;NR5A1;GATA2;GATA3;GATA6;GREM1;GDNF;INTU;GLI1;GSK3B;ANXA1;HDAC1;HDAC2;HIF1A;HOXA13;ICAM1;ID2;IFNG;RBPJ;IHH;IL1A;IL1B;IL13;AR;ITGA2;JUN;GSTK1;KCNQ1;KDR;KRAS;HES5;LGALS3;LIF;MIR200C;MIR21;MIR34A;SMAD3;SMAD4;MET;MMP9;MSI1;NOTCH…	9.18297	3.79e-71
GOBP_POSITIVE_REGULATION_OF_CELL_CELL_ADHESION	ADA;KLRC4-KLRK1;RASGRP1;LILRB2;CXCL13;LILRB1;CCR7;SIRPA;CSK;CD55;DPP4;AIF1;EPO;AKT1;ETS1;FGA;KLRK1;KIFAP3;FOXO3;PTPN22;GATA3;GLI3;CD274;ANXA1;HLA-DPB1;HLA-DQB1;HLA-DRB1;HLA-G;HMGB1;FOXA2;HSPD1;IFNG;IGF1;IHH;IL1A;IL1B;IL2;IL2RA;IL4;IL6;IL7;IL7R;IL10;IL12B;IL12RB1;IL15;IL18;JAK1;LEP;LGALS1;LGALS9;LYN;MIR21;MDK;KITLG;MYB;FOXP3;IL23A;PIK3CA;B2M;PTPRC;IL21;RELA;ACTB;BCL6;CCL2;CCL5;CCL19;CCL21;CX3CL1;S…	16.5697	7.25e-71
GOBP_DEVELOPMENTAL_PROCESS_INVOLVED_IN_REPRODUCTION	BCL2L11;CDKN1B;FST;CIB1;KHDRBS1;CFTR;PHB2;LRRK2;CNR1;ZFP42;PARP1;CSF1;CTNNB1;CYP1B1;CYP17A1;CYP19A1;ACE;DNMT3A;EDN1;EDNRA;EPOR;ERCC1;AKT1;ESR1;FGF9;FGFR2;FKBP4;FOXO3;SIRT1;CADM1;MTOR;FSHB;FSHR;NR5A1;GALNT3;NECTIN3;GATA3;GATA6;AMH;AMHR2;GJA1;GJB2;GLI1;GLI3;GNRH1;ANG;ANGPT2;GPX4;MSH6;DNMT3L;ANXA1;H2AX;HOXA10;HOXA11;HOXA13;HSD17B3;BIRC3;TNC;IGF1;IHH;IL1A;IL1B;INHA;INHBA;INSR;AR;AREG;KDR;LEP;LHB;LHCG…	7.61143	4.07e-70
GOBP_POSITIVE_REGULATION_OF_IMMUNE_RESPONSE	ADA;KLRC4-KLRK1;RASGRP1;KHDRBS1;CD226;LILRB1;PHB2;FCRL3;CCR7;CNR1;CSK;CTLA4;CD55;CFD;F2RL1;KLRK1;SIRT1;FPR1;FPR2;CADM1;NCR3;PTPN22;GATA2;GATA3;FOXP1;TNFRSF21;CD274;TBX21;ANXA1;HCK;HLA-B;HLA-DPB1;HLA-DQB1;HLA-DRB1;HLA-G;HMGB1;HSPD1;CFI;IFNG;IL1B;IL1R1;IL2;IL4;IL6;IL10;IL12B;IL12RB1;IL13;IL15;IL17A;IL18;IDO1;ITGAM;KIR2DL4;LGALS3;LGALS9;LIMK1;LTA;LYN;SH2D1A;MIR21;MIR34A;MBL2;MLH1;MMP12;MSH2;MYB;PAK1…	10.1454	3.3e-69
GOBP_HEAD_DEVELOPMENT	BCL2L11;ABCB6;CDK6;OSR2;LRRK2;COL1A1;CREB1;CRK;CSF1R;CSK;CTNNB1;CX3CR1;ACE;ARX;DLX5;DPYSL2;DRD2;AGTR2;S1PR1;EDNRA;EGF;EGFR;AIF1;EMX2;EPHB2;EPOR;EZH2;FANCD2;FGF2;FGF9;FGFR2;DKK1;NCOA6;FOXO3;PLCB1;CADM1;CADM2;CHD5;GATA2;GBA;GHRH;GHRHR;FOXP1;GLI1;GLI3;GSK3B;H2AX;HDAC1;HIF1A;HPRT1;HSD3B1;HSD3B2;ID2;IGF1R;RBPJ;IHH;CXCR2;AQP1;INHBA;ITGAM;ITGB1;KRAS;HES5;LAMB1;MAOB;MAS1;MDK;MECP2;MMP2;MMP14;MNAT1;ATM;NO…	8.28444	7.81e-69
GOBP_REGULATION_OF_EPITHELIAL_CELL_MIGRATION	PDCD6;CIB1;CXCL13;MAPK14;DCN;AGT;HBEGF;AGTR2;EDN1;EGF;AKT1;ETS1;FGF1;FGF2;SIRT1;CAPN7;MTOR;GATA2;GATA3;FOXP1;ANGPT1;ANGPT2;ANXA1;HIF1A;HMGB1;IFNG;APOE;IL4;ITGA2;ITGB3;JUN;KDR;MIR10B;MIR126;MIR132;MIR143;MIR20A;MIR200A;MIR200B;MIR200C;MIR204;MIR21;MIR210;TACSTD2;MIR22;MIR27B;MIR29C;MIR30A;MIR31;MECP2;MET;MMP9;MIR135B;MIR342;NFE2L2;NOS3;NOTCH1;SERPINF1;PIK3CB;PIK3CD;PIK3CG;DLL4;PPARG;PRKCA;PTEN;PTG…	17.4029	9.24e-69
GOBP_RESPONSE_TO_INORGANIC_SUBSTANCE	ADA;PDCD6;ABCB6;CDKN1B;NDRG1;CEBPA;TXNIP;CHUK;LRRK2;CCR7;COL1A1;CREB1;CRK;SIRPA;PARP1;CSF2;CYP1A1;CYP1A2;CYP1B1;DNMT3A;DRD2;EDN1;EGFR;ERCC1;AKT1;ERCC6;EZH2;FGA;FOXO1;FOXO3;PLCB1;SIRT1;FOS;ALOX15;FOXP1;SLC40A1;ANXA1;HDAC2;HGF;HIF1A;HP;APEX1;HSD17B1;IL1A;IL6;AQP1;IL10;AQP2;IMPA2;JUN;AREG;KDR;ARG1;MIRLET7B;MIR17;MIR21;MIR34A;MAOB;MET;MMP2;MMP3;MMP9;MNAT1;MPO;MIR342;NFE2L2;NOS3;NT5E;OGG1;TNFRSF11B;PA…	10.5745	1.06e-68
GOBP_POSITIVE_REGULATION_OF_PROTEIN_KINASE_ACTIVITY	RASGRP1;CDKN1A;CDKN1B;CIB1;AKAP13;PHB2;CKS1B;LRRK2;CCR7;CSF1;CSF1R;CSK;IL34;ADRA1A;ADRA2B;ACE;DRD2;AGT;HBEGF;EDN1;EGF;EGFR;EGR1;EPO;ERBB2;AKT1;ERCC6;EZH2;FGF1;FGF2;DKK1;FLT1;SIRT1;MTOR;GREM1;GH1;ANG;ANGPT1;IFNG;IGF1;CCN1;IL1B;IL4;IL12B;IL18;INSR;ITGB3;AREG;LEP;LTF;MIR143;MIR21;MAS1;KITLG;MIF;MNAT1;MST1R;NTF3;NTRK3;PAK1;PDGFA;IL23A;PDGFRB;PIK3CA;PIK3CG;MAP2K1;MAP2K7;PRLR;PSEN1;PSMD10;PTPRC;CCND1;C…	12.9718	1.07e-68
GOBP_REGULATION_OF_APOPTOTIC_SIGNALING_PATHWAY	BCL2L11;DNM1L;YAP1;LRRK2;PARP1;CSF2;CTH;CTNNB1;CX3CR1;AGT;AGTR2;ENO1;EPO;AKT1;FGA;SIRT1;DAPK2;GDNF;GPER1;PDIA3;GSK3B;GSTP1;HDAC1;HGF;HIF1A;ICAM1;IGF1;FAS;IL1A;IL1B;IL4;IL7;IL9;INHBA;AR;ITGAV;LGALS3;MIR132;MIR17;MIR21;MIR210;MIR27B;MDM2;MIF;MMP9;MUC1;MYC;NFE2L2;NGFR;NOS3;SERPINE1;PF4;PIK3CB;TREM2;WNT4;PPP2R1A;PSEN1;ACKR3;PSMD10;PTEN;PTGS2;PTPRC;BAX;RAF1;RB1;BCL2;RELA;BCL2L1;BDNF;CX3CL1;CXCL12;SFRP…	14.2236	1.2e-68
GOBP_REGULATION_OF_T_CELL_ACTIVATION	ADA;KLRC4-KLRK1;RASGRP1;LILRB2;LILRB1;CCR7;SIRPA;CSK;CTLA4;CTNNB1;CD55;DPP4;AIF1;EPO;ERBB2;AKT1;FANCD2;KLRK1;FOXO3;IL27;PTPN22;GATA3;TNFRSF21;GLI3;CD274;TBX21;ANXA1;HLA-DPB1;HLA-DQB1;HLA-DRB1;HLA-G;HMGB1;HSPD1;IFNG;IGF1;IHH;IL1A;IL1B;IL2;IL2RA;IL4;IL6;IL7;IL7R;IL10;IL12B;IL12RB1;IL15;IL18;IDO1;ARG1;LEP;LGALS1;LGALS3;LGALS9;LYN;MIR181C;MIR21;MDK;KITLG;MYB;FOXP3;IL23A;PIK3CA;B2M;PTEN;PTPRC;IL21;ACT…	14.1719	1.59e-68
GOBP_LEUKOCYTE_CHEMOTAXIS	KLRC4-KLRK1;DNM1L;CXCL13;CCR1;CCR5;CCR7;CSF1;CSF1R;IL34;CX3CR1;CYP19A1;DPP4;DUSP1;S1PR1;EDN1;AIF1;F2RL1;KLRK1;FLT1;FPR2;DAPK2;GREM1;MSTN;CXCL1;ANXA1;HMGB1;IL1B;IL4;IL6;CXCL8;CXCR1;CXCR2;IL10;IL16;CXCL10;LGALS3;LGALS9;LYN;MDK;MIF;CXCL9;MMP2;NINJ1;SERPINE1;IL23A;PF4;PF4V1;PGF;PIK3CD;PIK3CG;MAPK1;MAPK3;PTN;CXCL16;RARRES2;CCL1;CCL2;CCL5;CCL11;CCL14;CCL16;CCL17;CCL19;CCL21;CCL22;CCL25;CXCL5;CX3CL1;CXC…	20.7691	1.86e-68
GOBP_REGULATION_OF_IMMUNE_EFFECTOR_PROCESS	KLRC4-KLRK1;RASGRP1;NOD1;CD226;LILRB1;PHB2;FCRL3;CRK;CX3CR1;CD55;AHR;EPHB2;F2RL1;KLRK1;SIRT1;CADM1;IL27;NCR3;PTPN22;GATA2;GATA3;ANGPT1;TBX21;ANXA1;HK1;HLA-B;HLA-DRB1;HLA-G;HMGB1;HSPD1;APOA2;ICAM1;IFNG;IL1B;IL1R1;IL2;IL4;IL6;IL7R;IL10;IL12B;IL12RB1;IL13;IL17A;IL18;ITGAM;USP17L2;KIR2DL4;KLRC1;ARG1;LEP;LGALS3;LGALS9;LTA;LYN;SH2D1A;MIR21;MBL2;MIF;MLH1;MSH2;MYB;NOS2;FOXP3;IL23A;ENPP3;TREM2;AXL;B2M;PTP…	13.8692	8.48e-68
GOBP_MYELOID_LEUKOCYTE_MIGRATION	DNM1L;OLFM4;CXCL13;CCR1;CCR7;CD200R1;SIRPA;CSF1;CSF1R;IL34;CX3CR1;CYP19A1;DPP4;DUSP1;EDN1;AIF1;FLT1;PLCB1;FPR2;DAPK2;GREM1;MSTN;CXCL1;ANXA1;HMGB1;IL1A;IL1B;IL1R1;IL4;IL6;CXCL8;CXCR1;CXCR2;IL17A;CXCL10;RHOG;LGALS3;LYN;MDK;KITLG;MIF;CXCL9;MMP2;MMP14;CD200;SERPINE1;IL23A;PF4;PF4V1;PGF;PIK3CD;PIK3CG;TREM2;MAPK1;MAPK3;PTGER4;RARRES2;CCL1;CCL2;CCL5;CCL11;CCL14;CCL16;CCL17;CCL19;CCL21;CCL22;CCL25;CXCL5;…	20.2481	9.06e-68
GOBP_RESPONSE_TO_PEPTIDE_HORMONE	CDK4;CDKN1B;COL1A1;ADM;CREB1;CRHR1;CRHR2;CRK;PARP1;MAPK14;CSK;CCN2;CYP1B1;CYP11A1;AGRP;AGT;AGTR1;AGTR2;EDN1;EDNRA;EGR1;AHSG;AKT1;FBN1;FOXO1;PLCB1;SIRT1;FOS;MTOR;NR5A1;MSTN;GH1;GHRHR;GJB2;GNRHR;GPER1;GSK3B;ANXA1;NR4A1;APEX1;HSD11B2;IGF1R;IGFBP1;IL1B;IL10;INHBA;INSR;ITGB3;JAK1;AREG;KCNQ1;ARG1;LEP;LHCGR;LYN;MIR143;MIR145;MIR195;MAS1;NFE2L2;NFKB1;OXTR;ENPP1;PIK3CA;ERRFI1;PPARA;PPARG;PRKCB;RETN;PTGS2;…	12.754	1.78e-67
GOBP_NEGATIVE_REGULATION_OF_RNA_METABOLIC_PROCESS	TOB1;CDK6;CDKN1B;CDKN2A;YAP1;FST;CEBPA;TXNIP;KHDRBS1;CTCF;PHB2;OSR2;CREB1;PARP1;MAPK14;CSF2;CTNNB1;DDX5;ARX;DNMT1;DNMT3A;DNMT3B;EDN1;EGR1;AHR;ELAVL1;ENO1;EPO;NR2F6;ESR1;ESR2;EZH2;FGF9;FGFR2;ZHX2;DKK1;FOXM1;FOXO1;FOXO3;PLCB1;DICER1;SIRT1;HEY1;GABPA;CHD5;GATA2;GATA3;GATA6;GREM1;GDNF;FOXD3;ANKRD1;FOXP1;PDCD4;GLI3;NR3C1;DNMT3L;TBX21;HDAC1;HDAC2;HMGB1;HMGA1;HOXB4;APEX1;BIRC5;ID2;IFI27;IFNG;RBPJ;FASLG;…	5.94648	2.76e-67
GOBP_REGULATION_OF_LEUKOCYTE_MIGRATION	ADA;KLRC4-KLRK1;DNM1L;OLFM4;CXCL13;CCR1;CCR7;CD200R1;CRK;CSF1;CSF1R;IL34;CX3CR1;CYP19A1;DPP4;DUSP1;EDN1;AIF1;AKT1;F2RL1;KLRK1;PLCB1;FPR2;DAPK2;GREM1;MSTN;CXCR3;ANXA1;HMGB1;ICAM1;IL1A;IL1R1;IL4;IL6;CXCL8;CXCR2;CXCL10;ITGA2;ITGB3;RHOG;LGALS3;LGALS9;LYN;MDK;KITLG;MIF;MMP14;CD200;SERPINE1;IL23A;PGF;TREM2;MAPK1;MAPK3;PTGER4;PTN;RARRES2;CCL1;CCL2;CCL5;CCL19;CCL21;CCL25;CX3CL1;CXCL12;SELE;WNK1;ADAM17;TA…	21.043	3.25e-67
GOBP_UROGENITAL_SYSTEM_DEVELOPMENT	BCL2L11;CDKN1B;YAP1;OSR2;LRRK2;CTNNB1;CYP19A1;CYP26A1;ACE;AGT;AGTR1;AGTR2;EDNRA;EGR1;EMX2;EPHB2;ESR1;FBN1;FGF1;FGF2;FGFR2;FKBP4;AKR1B1;PLXND1;GATA2;GATA3;GREM1;GDNF;AMH;GLI1;GLI3;ANGPT1;ANGPT2;ANXA1;HOXA10;HOXA11;HOXA13;HPGD;TNC;CXCR2;AQP1;AQP2;ILK;AR;ITGB3;HES5;LIF;TACSTD2;EPCAM;SMAD2;SMAD3;SMAD4;MME;MMP2;MMP9;MYC;NOTCH1;PAX2;PDGFA;PDGFRA;PDGFRB;SERPINF1;WNT4;SULF2;PRLR;PTEN;BAX;ACTA2;RARB;BCL2;…	14.33	6.69e-67
GOBP_EXPORT_FROM_CELL	DNM1L;RASGRP1;ABCC4;CFTR;LILRB1;PRRT2;UCN3;LRRK2;CCR1;CNR1;ADM;CPB2;CREB1;CRH;CRHR1;ADRA1A;CCN2;ADRA2B;CYP19A1;DRD2;AGT;AGTR1;EDN1;F2R;F2RL1;FCGR3A;FGA;FOXO1;GATA2;GATA3;GDNF;GHRH;GHRHR;GJA1;ANKRD1;GNRHR;ANG;GPER1;ANK1;GSK3B;SLC40A1;ANXA1;ANXA2;HCK;HIF1A;HLA-DRB1;NR4A1;FOXA2;IFNG;IGF1;APOE;IL1A;IL1B;IL1RN;IL4;IL6;AQP1;IL11;IL12B;IL13;INHA;INHBA;ITGAM;KCNQ1;KISS1;LEP;LGALS9;LIF;LYN;MIR17;MIR21;MIR…	7.64	2.23e-66
GOBP_NEGATIVE_REGULATION_OF_INTRACELLULAR_SIGNAL_TRANSDUCTION	PDCD6;CIB1;LRRK2;SIRPA;MAPK14;CSK;ADRA1A;DRD2;AGT;DUSP1;DUSP2;DUSP6;ENO1;EPHB2;EPO;AKT1;ESR1;F2RL1;FBLN1;FOXM1;FOXO1;SIRT1;NUP62;SH3BP4;MTOR;PTPN22;GBA;MSTN;PDCD4;GPER1;CCDC22;GSK3B;GSTP1;HDAC1;HIF1A;HLA-G;APOE;IGF1R;IL1B;ITGB1;STMN1;LIF;LYN;MIR132;MIR145;MIR17;MIR195;MIR20A;MIR200C;MIR204;MIR21;MIR27B;MIR29C;MIR30C2;MIR34A;SMAD4;MDM2;MET;MIF;MMP9;MIR342;MUC1;MYC;ATM;NFE2L2;MIR375;PIK3CB;ERRFI1;T…	10.3927	2.33e-66
GOBP_SMOOTH_MUSCLE_CELL_PROLIFERATION	CDKN1A;CDKN1B;PPARGC1A;CTNNB1;DNMT1;AGT;HBEGF;S1PR1;EDN1;AIF1;AKT1;FGF2;FGF9;FGFR2;POLDIP2;GJA1;FOXP1;PDCD4;ANG;GPER1;HDAC1;HPGD;ID2;IFNG;IGF1;APOE;IGF1R;IGFBP3;IL6;IL10;IL12B;IL13;IL15;IL18;ITGA2;ITGB3;JUN;HES5;MIR143;MIR145;MIR17;MIR20A;MIR21;MIR214;MIR27B;MIR34A;MMP2;MMP9;MNAT1;MIR135B;NOS3;P2RY6;PDGFRB;PIK3CA;PPARG;PTEN;PTGS2;MIR503;CCL5;CX3CL1;BMP4;SOD2;SRC;TACR1;TERT;TGFB1;TGFB3;THBS1;TLR4;…	26.6635	2.51e-66
GOBP_REGULATION_OF_CHEMOTAXIS	KLRC4-KLRK1;DNM1L;SEMA3C;CXCL13;CCR1;CCR7;CSF1;CSF1R;IL34;CX3CR1;CYP19A1;DPP4;DUSP1;S1PR1;EDN1;MEGF8;AIF1;F2RL1;F3;FGF1;FGF2;KLRK1;FPR2;DAPK2;GREM1;MSTN;ANGPT2;HMGB1;IL4;IL6;CXCL8;CXCR2;IL16;CXCL10;ITGA2;KDR;LGALS9;LYN;MIR34A;SMAD3;MDK;MET;MIF;NOTCH1;NTF3;NTRK3;SERPINE1;PDGFRA;IL23A;PDGFRB;PGF;TREM2;MAPK1;MAPK3;SEMA6A;PTN;RARRES2;CCL1;CCL2;CCL5;CCL19;CCL21;CXCL12;SMOC2;WNK1;ADAM17;TGFB1;THBS1;C5;…	20.764	4.56e-66
GOBP_POSITIVE_REGULATION_OF_LEUKOCYTE_CELL_CELL_ADHESION	ADA;KLRC4-KLRK1;RASGRP1;LILRB2;LILRB1;CCR7;SIRPA;CSK;CD55;DPP4;AIF1;EPO;AKT1;ETS1;KLRK1;FOXO3;PTPN22;GATA3;GLI3;CD274;ANXA1;HLA-DPB1;HLA-DQB1;HLA-DRB1;HLA-G;HMGB1;HSPD1;IFNG;IGF1;IHH;IL1A;IL1B;IL2;IL2RA;IL4;IL6;IL7;IL7R;IL12B;IL12RB1;IL15;IL18;LEP;LGALS1;LGALS9;LYN;MIR21;MDK;KITLG;MYB;FOXP3;IL23A;PIK3CA;B2M;PTPRC;IL21;RELA;ACTB;BCL6;CCL2;CCL5;CCL19;CCL21;SELE;SMARCC1;SRC;THY1;TNF;CCR2;TYK2;VAV1;V…	17.5768	2.26e-65
GOBP_PEPTIDYL_TYROSINE_MODIFICATION	CSF1R;CSF2;CSF3;CSK;IL34;ADRA1A;ACE;AGT;HBEGF;EGF;EGFR;EPHA3;EPHB2;EPHB4;EPO;ERBB2;ERCC6;FGFR2;FLT1;MTOR;GREM1;GH1;ANGPT1;HCK;HDAC2;HGF;IFNG;IGF1;IGF1R;IL2;IL4;IL6;IL7;IL9;IL11;IL12B;IL13;IL15;IL18;INSR;ITGA5;ITGB3;JAK1;AREG;KDR;HES5;LEP;LIF;LYN;MET;KITLG;MIF;MST1R;NTF3;NTRK2;NTRK3;PDGFA;PDGFRA;IL23A;PDGFRB;ERRFI1;TREM2;PPP2R1A;AXL;MAPK3;MAP2K1;MAP2K7;PRLR;PSEN1;PTPRC;IL21;ROS1;CCL5;SFRP1;SFRP2;S…	13.3732	2.73e-65
GOBP_ENDOTHELIAL_CELL_MIGRATION	PDCD6;CIB1;CXCL13;MAPK14;CYP1B1;DCN;DPP4;AGT;AGTR2;EDN1;EGF;EPHB4;AKT1;ETS1;FGF1;FGF2;PLXND1;SIRT1;GATA2;GATA3;GREM1;FOXP1;ANGPT1;ANGPT2;ANXA1;HIF1A;HMGB1;NR4A1;APOE;ITGB1;ITGB3;KDR;MIR10B;MIR126;MIR132;MIR143;MIR20A;MIR200A;MIR200B;MIR200C;MIR204;MIR21;MIR210;MIR22;MIR27B;MIR29C;MIR30A;MIR31;MECP2;MET;MIR135B;MIR342;NFE2L2;NOS3;NOTCH1;SERPINF1;PIK3CA;PIK3CB;PIK3CD;PIK3CG;DLL4;PPARG;PRKCA;PTEN;PT…	17.0745	2.8e-65
GOBP_LIPID_METABOLIC_PROCESS	CDK4;CEBPA;CETP;CFTR;PPARGC1A;SMPDL3A;PHB2;CYP2R1;CCR7;CNR1;SGPP2;COMT;ADM;CRABP2;CREB1;CRH;CRK;MAPK14;CSF1R;CTH;CYP1A1;CYP1A2;CYP1B1;CYP2B6;CYP2C19;CYP3A4;TTC39B;CYP11A1;CYP17A1;CYP19A1;CYP26A1;AKR1C1;AKR1C2;DECR1;DIO2;EDN1;EGR1;AKT1;ESR1;F2;FGF1;FGF2;AKR1B1;FLT1;PLCB1;FMO2;SIRT1;ALOX15;MTOR;FSHB;NR5A2;NR5A1;PTPN22;GATA6;GBA;GC;HPGDS;ANG;GPER1;GPX4;NR3C1;GSTM1;GSTM2;GSTP1;ANXA1;ACACA;HPGD;HSD3B1…	5.83585	3.32e-65
GOBP_REGULATION_OF_HORMONE_LEVELS	CFTR;UCN3;CNR1;ADM;CRABP2;CREB1;CRH;CRHR1;CYP1A1;CYP1A2;CYP1B1;CYP3A4;CYP11A1;CYP17A1;CYP19A1;CYP26A1;ACE;AKR1C1;AKR1C2;DIO2;DPP4;DRD2;AGT;AGTR1;EDN1;EGR1;ESR1;FGA;FOXO1;AKR1B1;SLC7A8;FSHB;NR5A1;GATA3;GHRH;GHRHR;GJA1;GNRHR;GPER1;NR3C1;ANXA1;HIF1A;HLA-DRB1;FOXA2;HSD3B1;HSD3B2;HSD17B1;HSD17B3;HSD17B2;IFNG;IGF1R;IL1B;IL1RN;IL6;AQP1;IL11;INHA;INHBA;KCNQ1;KISS1;LEP;LHB;LHCGR;LIF;LIPE;ARNT;LYN;SMAD2;SM…	10.6781	3.56e-65
GOBP_REGULATION_OF_SECRETION	ADA;DNM1L;CFTR;LILRB1;UCN3;LRRK2;CNR1;CPB2;CREB1;CRH;CRHR1;ADRA1A;ADRA2B;CYP19A1;ACE;DRD2;AGT;AGTR1;EDN1;EGF;F2R;F2RL1;FGA;FOXO1;GATA2;GDNF;GHRH;GHRHR;GJA1;ANKRD1;ANG;GPER1;GSK3B;ANXA1;ANXA2;HIF1A;HLA-DRB1;FOXA2;IFNG;IGF1;APOE;IL1A;IL1B;IL4;IL6;AQP1;IL11;IL12B;IL13;INHA;INHBA;ITGAM;KCNQ1;KISS1;LEP;LGALS9;LIF;LYN;MIR17;MIR30C1;MIR33A;SMAD4;MAOB;MIF;CD200;NOS2;NOTCH1;OPRM1;OXTR;TREM2;KRT20;PPARG;PR…	9.39988	4.84e-65
GOBP_CELLULAR_RESPONSE_TO_BIOTIC_STIMULUS	BCL2L11;KLRC4-KLRK1;CDK4;LILRB2;CXCL13;TXNIP;LILRB1;CCR5;SIRPA;MAPK14;CSF2;CSF3;CX3CR1;CD55;EPHB2;AKT1;KLRK1;PTPN22;ANKRD1;IL37;PDCD4;CD274;CXCL1;GSK3B;GSTP1;HCK;HMGB1;TICAM2;IL1A;IL1B;IL6;CXCL8;IL10;IL12B;IL18;CXCL10;ARG1;LTF;LYN;MIR17;MIR20A;MIR21;MIF;CXCL9;MRC1;MIR342;NFKB1;NFKBIA;NOS2;NOS3;NOTCH1;SERPINE1;PF4;PF4V1;TREM2;PRKCA;AXL;MAPK1;MAPK3;MAPK8;MAP2K7;RELA;CCL2;CCL5;CXCL5;CX3CL1;SRC;BTK;T…	18.2972	5.3e-65
GOBP_REGULATION_OF_MYELOID_CELL_DIFFERENTIATION	CDK6;CIB1;LILRB1;H4-16;CCR1;CREB1;MAPK14;CSF1;CSF3;IL34;CTNNB1;ETS1;FBN1;FOXO3;FOS;MTOR;FSHB;GABPA;GATA2;FOXP1;HIF1A;HLA-DRB1;IAPP;ID2;IFNG;IL4;IL12B;IL17A;INHA;INHBA;LIF;LOX;ARNT;LTF;LYN;MIR145;KITLG;MYB;MYC;NFKBIA;TNFRSF11B;IL23A;KLF13;PF4;TREM2;MED1;H4C15;PRKCA;B2M;RB1;SFRP1;STAT3;TGFB1;KLF10;TLR3;TLR4;TNF;TYROBP;ZFP36;DCSTAMP;H4C9;H4C1;H4C4;H4C6;H4C12;H4C11;H4C3;H4C8;H4C2;H4C5;H4C13;H4C14;RUN…	21.8272	6.27e-65
GOBP_MUSCLE_STRUCTURE_DEVELOPMENT	SRA1;MYL9;PDLIM5;AKAP13;ADM;CREB1;MAPK14;ADRA1A;CTH;CTNNB1;DDX5;DNMT1;AGT;HBEGF;S1PR1;EDN1;EDNRA;EGR1;AKT1;EZH2;FGF9;FGFR2;DKK1;PLCB1;SIRT1;HEY1;FOS;MTOR;LMOD1;GATA6;GREM1;MSTN;ANKRD1;FOXP1;PDCD4;GPER1;TMOD3;HDAC1;ERVW-1;NR4A1;ID2;IGF1;IGFBP3;RBPJ;IL4;IL18;CXCL10;ITGB1;KRAS;LAMB1;LGALS1;LIF;LOX;MIR100;MIR143;MIR145;MIR195;MIR200B;MIR204;MIR21;MIR22;MIR34A;SMAD3;SMAD4;MDM2;MECP2;CXCL9;MMP14;NINJ1;…	8.82205	6.33e-65
GOBP_OSSIFICATION	TOB1;CDK6;ADAR;YAP1;CEBPA;CTHRC1;OSR2;CCR1;COL1A1;MAPK14;CSF1;VCAN;CCN2;CTNNB1;DDX5;DLX5;S1PR1;EGFR;AHSG;ERCC2;AKT1;FGF2;FGF9;FGFR2;DKK1;ALOX15;GREM1;INTU;GLI1;GLI3;GSK3B;HGF;HIF1A;TNC;IGF1;IGFBP3;CCN1;RBPJ;IHH;IL6;ILK;AREG;LEP;LOX;LTF;MIR17;MIR20A;MIR200C;MIR21;MIR210;SMAD3;SMAD4;MDK;MMP2;MMP9;MMP13;MMP14;NOTCH1;ENPP1;WNT4;PPARG;MAPK1;MAPK3;ANKH;PTGER4;PTGS2;PTN;BCL2;RORB;RXRA;SFRP1;SFRP2;BMP4;B…	12.2516	7.62e-65
GOBP_NEURON_DEVELOPMENT	UST;PLXNC1;PAK4;CARM1;SEMA3C;CIB1;PDLIM5;CFL1;CTHRC1;LRRK2;CNR1;ADM;CRABP2;CREB1;CRK;CRMP1;CSF1R;CTNNB1;ARX;DLX5;DPYSL2;DRD2;AGT;EDN1;EDNRA;MEGF8;EPHA3;EPHB2;EPHB4;EPO;NR2F6;ERBB2;AKT1;ERCC6;EZH2;FGFR2;FKBP4;DKK1;PLXND1;NEDD4L;FN1;DICER1;LPAR3;GATA2;GATA3;GBA;GDNF;TNFRSF21;GLI3;MYLIP;GSK3B;HDAC2;HGF;HMGB1;HPRT1;TNC;APOE;IGF1R;IHH;IL2;IL6;ITGB1;JUN;AREG;KCNQ1;HES5;L1CAM;RHOG;LAMB1;LAMC2;STMN1;LEP;…	6.58549	1.99e-64
GOBP_REGULATION_OF_CELLULAR_RESPONSE_TO_STRESS	BCL2L11;RASGRP1;NOD1;AGR2;BRD8;LRRK2;CCR7;CRK;SIRPA;PARP1;CCN2;CTNNB1;DDX5;DUSP1;EGFR;ENO1;EPO;ERCC1;AKT1;ERCC6;F2RL1;FOXM1;FOXO1;FOXO3;PLCB1;SIRT1;MTOR;PTPN22;GREM1;ANKRD1;FOXP1;PDCD4;GSK3B;GSTP1;H2AX;HGF;HIF1A;HMGB1;IGF1R;IGFBP6;FAS;IL1A;IL1B;IL10;LEP;LGALS9;LYN;MIRLET7B;MIR132;MIR145;MIR17;MIR195;MIR20A;MIR21;MIR210;MIR34A;MDM2;MET;MIF;MMP3;MUC1;MYC;ATM;NFE2L2;OGG1;OPRM1;PCNA;PIK3CB;TREM2;MAPK…	8.40822	7.46e-64
GOBP_RESPONSE_TO_EXTRACELLULAR_STIMULUS	CDKN1A;POSTN;PPARGC1A;UCN3;LRRK2;CNR1;COL1A1;COMT;ADM;MAPK14;CYP1A1;CYP1B1;CYP26A1;ACE;DNMT3A;AIF1;EPO;ERCC1;AKT1;ERCC6;ALB;FOXO1;FOXO3;SIRT1;FOS;MTOR;GBA;GH1;GHRH;FOXA2;HSD11B2;APOE;IGF1R;FAS;IL1A;AQP2;IL15;CXCL10;ITGA2;ARG1;LEP;LTA;LYN;MPO;NFE2L2;OGG1;TNFRSF11B;OPRM1;PAX2;WNT4;PON1;KRT20;PPARA;UGT1A1;PPARG;MED1;AXL;MAPK1;MAPK3;MAPK8;PRL;PTGS2;PTPRC;BAX;CCND1;BCL2;RXRA;SFRP1;SFRP2;SLC2A1;SLC6A4;…	10.7267	1.17e-63
GOBP_POSITIVE_REGULATION_OF_VASCULATURE_DEVELOPMENT	PDCD6;PAK4;ADM;CX3CR1;CYP1B1;ETS1;F3;FGF1;FGF2;FLT1;SIRT1;GATA2;GATA6;GREM1;ANGPT2;HGF;HIF1A;IL1A;IL1B;CXCL8;CXCR2;AQP1;IL10;ITGA5;ITGB1;ITGB3;ITGB8;JAK1;KDR;MIRLET7B;MIR126;MIR132;MIR143;MIR20A;MIR21;MIR210;MIR27B;MIR30A;MIR31;MDK;NFE2L2;NINJ1;NOS3;MIR378A;SERPINE1;PGF;PIK3CD;PRKCA;PRKCB;MYDGF;MIR451A;S100A1;CCL11;SMOC2;SFRP2;BRCA1;STAT3;BTG1;TEK;TERT;THBS1;TLR3;C3;C5;TWIST1;VEGFA;VEGFC;XBP1;CXC…	24.1987	2.93e-63
GOBP_RESPONSE_TO_OXIDATIVE_STRESS	TXNIP;PPARGC1A;CHUK;LRRK2;COL1A1;CRK;SIRPA;PARP1;CTNNB1;CYP1B1;DAPK1;EDN1;EDNRA;EGFR;AIF1;ERCC1;ERCC2;AKT1;ERCC6;EZH2;FANCD2;FOXO1;FOXO3;SIRT1;FOS;GBA;GJB2;FOXP1;GPX3;GPX4;GSTP1;ANXA1;HDAC2;HGF;HIF1A;HP;APEX1;APOE;IL1A;IL6;AQP1;IL10;JUN;AREG;ARG1;ARNT;MIRLET7B;MIR132;MIR17;MIR195;MIR21;MIR34A;MBL2;MET;MMP2;MMP3;MMP9;MMP14;MPO;NFE2L2;NOS3;OGG1;PAX2;PCNA;PDGFRA;PDGFRB;TREM2;AXL;MAPK1;MAPK3;MAPK8;PS…	11.7202	1.01e-62
GOBP_EMBRYONIC_MORPHOGENESIS	BCL2L11;TSHZ1;YAP1;CTHRC1;OSR2;ADM;CRABP2;CTNNB1;DLX5;DUSP1;DUSP2;EDN1;EDNRA;MEGF8;EPHB2;FBN1;FGF2;FGF9;FGFR2;DKK1;FLT1;FN1;GATA2;GATA3;GATA6;GREM1;GDNF;GJA1;INTU;GLI1;GLI3;HDAC1;HDAC2;HIF1A;FOXA2;HOXA10;HOXA11;HOXA13;HOXB4;ID2;CCN1;IHH;IL1RN;IL10;INHBA;AR;ITGA2;ITGA5;ITGAV;ITGB1;ITGB3;KCNQ1;HES5;LAMB1;MIR145;MIR200C;SMAD2;SMAD3;SMAD4;MMP2;MMP9;MMP14;NOTCH1;YBX1;PAX2;PDGFRA;WNT4;DLL4;POU5F1;MED1;…	9.19825	4.03e-62
GOBP_INNATE_IMMUNE_RESPONSE	KLRC4-KLRK1;RASGRP1;ADAR;NOD1;CD226;LILRB1;PHB2;CHUK;CRK;CRP;SIRPA;PARP1;CSF1;CSF1R;IL34;CX3CR1;CD55;DAPK1;DEFB4A;CFD;DRD2;EDN1;AIF1;F2RL1;FCGR3A;FGA;KLRK1;FPR2;CADM1;IL27;NCR3;PTPN22;GATA3;ANG;GPER1;ANXA1;HCK;HK1;HLA-B;HLA-C;HLA-G;HMGB1;BIRC2;BIRC3;CFI;IFI27;IFIT1;IFNA1;IFNA13;IFNG;IFNGR1;APOE;TICAM2;IL1RAP;FASLG;IL4;IL12B;IL12RB1;IL17A;IL18;CXCL10;ISG20;ITGAM;JAK1;KIR2DL4;KIR3DL1;KLRC1;ARG1;LEP…	7.14593	5.75e-62
GOBP_MYELOID_LEUKOCYTE_DIFFERENTIATION	CDK6;CEBPA;LILRB1;CCR1;CCR7;CREB1;PARP1;MAPK14;CSF1;CSF1R;CSF2;CSF3;IL34;CTNNB1;F2RL1;FBN1;SIRT1;FOS;MTOR;FSHB;GATA2;GATA3;GBA;FOXP1;ANXA2;HLA-DRB1;IAPP;ID2;IFNG;RBPJ;IL4;IL12B;IL15;IL17A;INHA;INHBA;ITGB8;JUN;LBR;LGALS9;LIF;LTF;LYN;MIR145;KITLG;MMP9;MYC;TNFRSF11B;IL23A;PF4;PIK3CD;TREM2;PPARG;MED1;PRKCA;PSEN1;RB1;CCL19;SFRP1;BMP4;SRC;TGFB1;KLF10;TLR2;TLR3;TLR4;TNF;TYROBP;VEGFA;DCSTAMP;RUNX1;ADIPOQ…	20.1866	2.12e-61
GOBP_CELLULAR_RESPONSE_TO_PEPTIDE	BCL2L11;CDK4;NOD1;CRHR1;CRHR2;CRK;PARP1;CSK;CYP1B1;CYP11A1;AGT;AGTR1;AGTR2;EDN1;EDNRA;AHSG;EPHB2;AKT1;FBN1;FOXO1;FOXO3;PLCB1;SIRT1;FOS;FPR2;PTPN22;MSTN;GH1;GHRHR;GJA1;GJB2;GNRHR;GPER1;GSK3B;NR4A1;APEX1;ICAM1;IGF1;IGF1R;IGFBP1;IL1B;INHBA;INSR;ITGB3;JAK1;ARG1;LEP;LHCGR;LYN;MIR143;MIR145;MIR195;MIR200A;MAS1;MDM2;NFE2L2;NFKB1;NGFR;ENPP1;PIK3CA;ERRFI1;TREM2;PPARG;PRKCB;PSEN1;RARRES2;RB1;RELA;ROCK1;SHC…	12.8191	2.2e-61
GOBP_NEGATIVE_REGULATION_OF_LOCOMOTION	ADA;MIR543;KLRC4-KLRK1;SEMA3C;CXCL13;CD200R1;CLDN3;CRK;CX3CR1;CYP1B1;CYP19A1;DCN;DPP4;DRD2;DUSP1;AGTR2;AIF1;AKT1;FBLN1;FGF2;KLRK1;FOXO3;PLCB1;GATA3;GREM1;GJA1;GNRH1;ANGPT2;HAS1;HDAC1;HDAC2;HMGB1;APEX1;APOE;IGFBP3;IL4;MIR126;MIR132;MIR145;MIR20A;MIR200B;MIR200C;MIR204;MIR21;MIR214;TACSTD2;MIR22;MIR29C;MIR30C2;MIR34A;MECP2;MIF;CD200;NFE2L2;NGFR;NOTCH1;SERPINE1;SERPINF1;WNT4;DLL4;PPARG;PTEN;PTGER4;M…	11.8687	2.38e-61
GOBP_NEGATIVE_REGULATION_OF_CATALYTIC_ACTIVITY	KLRC4-KLRK1;CDKN1A;CDKN1B;CDKN2A;ADAR;CEBPA;CIB1;TXNIP;LRRK2;CNR1;CSK;DRD2;AGT;DUSP1;AHSG;EPHB2;AKT1;KLRK1;SIRT1;NUP62;SH3BP4;PTPN22;GBA;MSTN;PDCD4;GSK3B;GSTP1;ANXA1;ANXA2;HGF;NR4A1;FOXA2;HP;BIRC2;BIRC3;BIRC5;APOA2;IFIT1;IFNG;APOE;IL1B;IL7;IL9;AQP1;IL13;USP17L2;KNG1;LEPR;LGALS3;LIMK1;LPA;LTF;LYN;MIRLET7B;MIR132;MIR17;MIR195;MIR20A;MIR21;MIR210;MIR27B;MIR29C;MIR34A;MMP9;MNAT1;NFKB1;NGF;NOS1;NOS3;N…	7.72582	3.85e-61
GOBP_SEX_DIFFERENTIATION	BCL2L11;FST;ZFP42;CTNNB1;CYP1B1;CYP17A1;CYP19A1;ACE;ERCC1;ESR1;FGF9;FKBP4;FOXO3;SIRT1;FSHB;FSHR;NR5A1;GATA3;GATA6;AMH;AMHR2;GNRH1;ANG;HOXA10;HOXA11;HOXA13;HSD17B3;IL1A;INHA;INHBA;INSR;AR;KDR;LEP;LHB;LHCGR;SMAD4;MAS1;KITLG;MMP2;MMP14;MSH2;ATM;NOS3;PDGFA;PDGFRA;PDGFRB;PGR;WNT4;AXL;RETN;BAX;CCND1;BCL2;REN;BCL2L1;SDC1;SFRP1;SFRP2;BMPR1B;SLIT3;SOD1;SOX9;SOX15;SRC;SRD5A1;SRD5A2;SRY;BRCA2;TCF21;NR2F2;TG…	15.7824	6.37e-61
GOBP_RESPONSE_TO_ALCOHOL	CDK4;CFTR;UCN3;CCR5;CCR7;CNR1;CLDN3;CLDN7;CREB1;CRHR1;PARP1;CSF3;CTNNB1;CYP1B1;ACE;AKR1C2;DNMT3A;DRD2;AHR;AKT1;FGFR2;FOXO3;FOS;GATA3;MSTN;GNRH1;HDAC2;ACACA;HPGD;HSD3B1;HSD3B2;BIRC2;IGF1R;IGFBP7;IL2;IL13;INHBA;LEP;SMAD2;MAOB;MIR342;NTRK3;OGG1;OPRM1;P2RY6;FOXP3;PPARA;UGT1A1;PTGER2;PTGER4;PTGFR;CCND1;BCL2L1;RGS4;CCL19;CCL21;SFRP1;SLC2A4;SLIT3;SOD1;SOD2;BRCA1;TACR1;KLF9;TGFB1;TGFBR1;TSPO;CLDN5;TNF;VC…	17.5505	6.7e-61
GOBP_TISSUE_REMODELING	SEMA3C;CTHRC1;CSF1R;CSK;CTNNB1;ACE;AGT;AGTR2;S1PR1;EDNRA;F2R;FSHB;GREM1;GJA1;HIF1A;IAPP;RBPJ;IHH;IL1A;IL2;IL6;IL7;IL12B;IL15;IL18;ITGB3;ARG1;LEP;LEPR;LIF;MIR143;MIR17;MIR195;MIR20A;MIR214;MIR27B;MIR34A;MDK;MDM2;MMP2;MMP14;NFKB1;NOS3;TNFRSF11B;IL23A;PLG;DLL4;PPARG;PRKCA;AXL;PTN;BAX;IL21;ROCK1;SFRP1;SPP1;SRC;TGFB1;TGFB3;TIMP1;TP53;CCR2;VDR;CALCA;DCSTAMP;RUNX1;ACVR2B;HAND2;RASSF2	24.1795	1.06e-60
GOBP_CHEMICAL_HOMEOSTASIS	ABCB6;CEBPA;CETP;CFTR;PPARGC1A;CLCN3;LRRK2;CCR1;CCR5;CCR7;CNR1;ADM;CPB2;CLDN4;TTC39B;ACE;AKR1C1;DRD2;AGT;AGTR1;EDN1;EDNRA;AKT1;F2;F2R;FGF2;FOXO1;FOXO3;AKR1B1;SIRT1;SLC7A8;NR5A2;GBA;GHRHR;GPER1;CCDC22;MYLIP;GSTM2;GSTP1;SLC40A1;HIF1A;HK1;ACACA;HLA-DRB1;FOXA2;APOA2;ICAM1;IFIT1;IFNG;APOE;IGF1R;IL1A;FASLG;IL6;AQP1;AQP2;IL13;IL18;CXCL10;INSR;ITGB3;KCNQ1;KDR;STMN1;LEP;LEPR;LHCGR;LIPC;LTF;LYN;MIR132;MIR1…	6.49144	1.2e-60
GOBP_RESPONSE_TO_KETONE	CDK4;YAP1;TXNIP;POSTN;CFTR;UCN3;CCR7;CLDN4;CREB1;PARP1;CYP1B1;ACE;AKR1C2;EDN1;AHR;EPO;AKT1;FOXO3;SIRT1;FOS;GBA;MSTN;GJB2;FOXP1;NR3C1;ACACA;HOXA10;HOXA11;HOXA13;HSD3B1;HSD3B2;IGF1R;IGFBP7;AQP1;AR;ARG1;MAOB;MIR342;NTRK3;OXTR;P2RY6;PAPPA;FOXP3;PCNA;SERPINF1;PIK3CA;ERRFI1;TRERF1;PTGER2;PTGER4;PTGFR;CCND1;BCL2L1;CCL19;CCL21;SFRP1;SLIT3;SPP1;SRC;SRD5A1;SRD5A2;TACR1;KLF9;TGFB1;TGFB2;TGFB3;THBS1;TSPO;TLR…	20.929	6.94e-60
GOBP_DEVELOPMENT_OF_PRIMARY_SEXUAL_CHARACTERISTICS	BCL2L11;FST;ZFP42;CYP1B1;CYP19A1;ACE;ERCC1;ESR1;FGF9;FOXO3;SIRT1;FSHB;FSHR;NR5A1;GATA3;GATA6;AMH;AMHR2;GNRH1;ANG;HOXA10;HOXA11;IL1A;INHA;INHBA;INSR;AR;KDR;LEP;LHB;LHCGR;SMAD4;MAS1;KITLG;MMP2;MMP14;MSH2;ATM;NOS3;PDGFA;PDGFRA;PDGFRB;PGR;WNT4;RETN;BAX;CCND1;BCL2;REN;BCL2L1;SDC1;SFRP1;SFRP2;BMPR1B;SLIT3;SOD1;SOX9;SOX15;SRC;SRD5A1;SRD5A2;SRY;BRCA2;TCF21;NR2F2;TGFB2;TGFBR1;TLR3;VEGFA;WT1;ZP3;CASP3;UTF1…	18.1933	1.38e-59
GOBP_NEGATIVE_REGULATION_OF_CELL_ADHESION	PLXNC1;LILRB2;CDKN2A;LILRB1;COL1A1;CLDN7;CTLA4;CYP1B1;DUSP1;EPHB2;ERBB2;AKT1;FBLN1;PLXND1;PTPN22;TNFRSF21;GLI3;ANGPT1;ANGPT2;CD274;TBX21;ANXA1;HLA-DRB1;HLA-G;HMGB1;IHH;IL1RN;IL2;IL2RA;IL4;IL10;IDO1;KNG1;ARG1;LGALS3;LGALS9;MIR141;MIR181C;MIR183;MIR21;TACSTD2;MIR29C;MIR31;EPCAM;MDK;MMP2;MMP12;MMP14;MUC1;NOTCH1;NOTCH4;SERPINE1;FOXP3;PLG;PPARA;PTEN;MIR503;SEMA6A;PTPRC;RASA1;BCL6;CCL21;CCL25;CX3CL1;SD…	14.6253	1.8e-59
GOBP_REGULATION_OF_ENDOTHELIAL_CELL_MIGRATION	PDCD6;CIB1;CXCL13;MAPK14;DCN;AGT;AGTR2;EDN1;EGF;AKT1;ETS1;FGF1;FGF2;SIRT1;GATA2;GATA3;FOXP1;ANGPT1;ANGPT2;ANXA1;HIF1A;HMGB1;APOE;ITGB3;KDR;MIR10B;MIR126;MIR132;MIR143;MIR20A;MIR200A;MIR200B;MIR200C;MIR204;MIR21;MIR210;MIR22;MIR27B;MIR29C;MIR30A;MIR31;MECP2;MET;MIR135B;MIR342;NFE2L2;NOS3;NOTCH1;SERPINF1;PIK3CB;PIK3CD;PIK3CG;DLL4;PPARG;PRKCA;PTGS2;MIR503;PTN;MIR483;SMOC2;BMP4;STC1;ADAM17;TDGF1;TEK;…	18.6295	2.01e-59
GOBP_NEURON_DEATH	BCL2L11;PPARGC1A;LRRK2;CD200R1;PARP1;CSF1;CSF3;CTNNB1;CX3CR1;AGTR2;EGR1;EPO;AKT1;F2R;DKK1;FOXO3;PLXND1;SIRT1;FOS;GATA3;GBA;GDNF;TNFRSF21;ANGPT1;NR3C1;GSK3B;HIF1A;IFNG;APOE;FAS;FASLG;IL10;IL13;ITGAM;JUN;KDR;KIR3DL2;KRAS;MIR181C;MIR200A;MIR200C;MDK;MECP2;CD200;MSH2;ATM;NGF;NGFR;NTF3;NTF4;NTRK2;SERPINF1;PIK3CA;TREM2;PPARA;PPT1;AXL;MAP2K7;PSEN1;BAX;RASA1;RB1;CCND1;BCL2;BCL2L1;ROCK1;BDNF;CCL2;CCL5;CX3…	12.7295	2.77e-59
GOBP_REGULATION_OF_PROTEIN_SERINE_THREONINE_KINASE_ACTIVITY	RASGRP1;CDKN1A;CDKN1B;CDKN2A;CDKN3;CEBPA;CIB1;AKAP13;CKS1B;LRRK2;CSF1R;CSK;IL34;AGT;DUSP1;EDN1;EGF;EGFR;ERBB2;AKT1;EZH2;FGF1;FGF2;DKK1;FLT1;SIRT1;NUP62;PTPN22;GBA;GH1;PDCD4;GSTP1;GTF2H1;IFNG;APOE;IL1B;INSR;LTF;LYN;MIR20A;MIR34A;KITLG;MIF;MNAT1;MST1;MST1R;NTF3;NTRK3;PAK1;HERC5;PDGFA;PDGFRB;PIK3CB;PIK3CG;PLK1;PPARG;MAP2K1;MAP2K7;PSEN1;PSMD10;PTEN;PTPRC;RB1;CCND1;ACTB;CCL19;SFRP1;SFRP2;BMP4;BMP7;BMP…	11.9731	3.2e-59
GOBP_NEGATIVE_REGULATION_OF_TRANSCRIPTION_BY_RNA_POLYMERASE_II	CDK6;YAP1;FST;CEBPA;TXNIP;KHDRBS1;CTCF;OSR2;PARP1;CTNNB1;DDX5;ARX;DNMT1;DNMT3A;DNMT3B;EDN1;EGR1;ENO1;EPO;NR2F6;ESR1;ESR2;EZH2;FGF9;FGFR2;ZHX2;DKK1;FOXM1;FOXO1;FOXO3;DICER1;SIRT1;HEY1;GABPA;CHD5;GATA2;GATA3;GATA6;FOXD3;FOXP1;GLI3;NR3C1;TBX21;HDAC1;HDAC2;HMGB1;HOXB4;ID2;IFI27;IFNG;RBPJ;FASLG;IL4;AR;JUN;HES5;LEP;SMAD3;SMAD4;MDM2;MECP2;MMP12;MYB;MYC;NFKB1;NOTCH1;NOTCH4;YBX1;FOXP3;PCNA;PLK1;DLL4;POU5F…	6.776	3.86e-59
GOBP_MULTI_MULTICELLULAR_ORGANISM_PROCESS	CNR1;ADM;CLDN4;CRH;CRHR1;PARP1;ADRA2B;CYP1A1;ACE;AGRP;AGT;EDN1;EPO;EPOR;AKT1;ESR1;FBLN1;FKBP4;FOS;FSHB;GJA1;GJB2;ANGPT2;HPGD;HSD11B2;IGFBP7;IHH;IL1B;IDO1;AR;ITGA2;ITGA5;ITGB3;ARG1;LEP;LGALS9;LIF;MIR21;STS;MMP2;MMP9;OXTR;PAPPA;PGF;PGR;WNT4;MED1;PRL;PRLR;PTGFR;PTGS2;PTN;RXFP1;BCL2;SLC2A1;SLC6A4;SOD1;SPP1;STC1;BSG;TAC1;TACR1;NR2F2;TGFB3;TIMP1;TRO;UCN;VDR;VEGFA;CALCA;SLC38A1;STC2;ACVR1B	19.6123	3.89e-59
GOBP_PROTEIN_KINASE_B_SIGNALING	PDCD6;CIB1;HPSE;CCR7;CSF3;CX3CR1;AKR1C2;DRD2;HBEGF;EGF;EGFR;AKT1;F3;FGF2;SIRT1;MTOR;GATA3;MSTN;ANGPT1;GPER1;HLA-G;IAPP;IGF1;IGF1R;IL1B;IL18;ILK;INSR;ITGB1;KDR;LEP;LOX;MIR126;MIR132;MIR143;MIR145;MIR20A;MIR200C;MIR21;MIR29C;MIR34A;MET;MIR342;MST1R;NTRK2;NTRK3;MIR375;PAX2;PDGFA;PIK3CA;PIK3CB;PIK3CD;PIK3CG;PPARA;AXL;MYDGF;PTEN;MIR451A;CCL2;CCL5;CCL19;CCL21;CX3CL1;SOX9;SRC;TEK;TGFB1;TGFBR1;THBS1;TNF;…	19.4767	5.71e-59
GOBP_CELL_MORPHOGENESIS	UST;PLXNC1;YAP1;SEMA3C;CIB1;OLFM4;PDLIM5;CFL1;LRRK2;CLDN4;CLDN3;CRABP2;CREB1;CRK;CRMP1;MAPK14;CSF1R;CTNNB1;ARX;DLX5;DPYSL2;DRD2;EDN1;EDNRA;MEGF8;EGFR;EPHA3;EPHB2;EPHB4;ERBB2;F2;FBLN1;FGA;FGFR2;DKK1;PLXND1;NEDD4L;FN1;DICER1;LPAR3;GATA3;GREM1;GDNF;GLI3;GSK3B;ANXA1;HCK;HGF;HOXA13;HPRT1;APOE;IGF1R;IHH;IL7R;ILK;AR;ITGAV;ITGB1;ITGB3;KDR;RHOC;L1CAM;RHOG;LAMB1;LAMC2;STMN1;LIMK1;MIR21;TACSTD2;SMAD4;MAP2;M…	6.51422	6.85e-59
GOBP_NEGATIVE_REGULATION_OF_CYTOKINE_PRODUCTION	CDH3;LILRB1;CCR7;CD200R1;SIRPA;CSK;CX3CR1;EPHB2;EZH2;F2;F2RL1;FN1;DICER1;PTPN22;GATA3;GATA6;GBA;IL37;TNFRSF21;PDCD4;ANGPT1;CD274;GSTP1;TBX21;ANXA1;HGF;HLA-DRB1;HMGB1;APOA2;IFNG;IGF1;IL4;IL6;IL10;IL12B;IL13;IDO1;INHA;INHBA;ARG1;LGALS9;LTF;MIR100;MIR132;MIR142;MIR145;MIR17;MIR181C;MIR195;MIR20A;MIR200B;MIR200C;MIR204;MIR205;MIR21;MIR27B;MIR31;MIR34A;CD200;NFKB1;MIR378A;FOXP3;IL23A;ERRFI1;TREM2;PPAR…	12.5002	9.86e-59
GOBP_MULTICELLULAR_ORGANISMAL_HOMEOSTASIS	CDH3;YAP1;CFTR;PPARGC1A;CLCN3;CNR1;CLDN4;CLDN3;CSF1;CSF1R;CSK;CCN2;CTNNB1;DECR1;DIO2;DRD2;S1PR1;EGR1;ERCC6;ESRRB;ALB;F2R;FOXO1;AKR1B1;FMO2;SIRT1;FSHB;GATA2;GATM;GBA;GJA1;ANGPT1;SLC40A1;ACACA;HOXA13;IAPP;IGF1R;RBPJ;IHH;IL1A;IL1B;IL4;IL6;IL7;AQP1;AQP2;IL13;IL15;IL17A;IL18;ITGB1;ITGB3;KDR;KRAS;STMN1;LEP;LEPR;LTF;MET;MUC2;MUC4;NOS3;NOTCH1;TNFRSF11B;OXTR;PIK3CA;PRKCA;PRLR;B2M;PTGS2;BAX;RB1;BCL2;ACTB;S…	9.64646	1.01e-58
GOBP_MONONUCLEAR_CELL_MIGRATION	KLRC4-KLRK1;CXCL13;CCR1;CCR5;CCR7;CD200R1;CRK;SIRPA;CSF1;CSF1R;IL34;CX3CR1;DUSP1;S1PR1;AIF1;AKT1;KLRK1;FLT1;PLCB1;FPR2;GATA3;GBA;GREM1;MSTN;TBX21;ANXA1;HMGB1;ICAM1;IL4;IL6;CXCR1;CXCR2;CXCL10;ITGB3;LGALS3;LGALS9;LYN;MDK;CD200;SERPINE1;PIK3CD;PIK3CG;PLG;MAPK1;MAPK3;CXCL16;RARRES2;CCL1;CCL2;CCL5;CCL11;CCL14;CCL16;CCL17;CCL19;CCL21;CCL22;CCL25;CX3CL1;CXCL12;WNK1;ADAM17;THBS1;TNF;CCR2;CXCR4;CALCA;ARTN…	20.4651	1.44e-58
GOBP_EPITHELIAL_TUBE_MORPHOGENESIS	YAP1;PHB2;CTHRC1;ADM;CSF1;CSF1R;CTNNB1;AGT;AGTR2;EDN1;EDNRA;EGF;MEGF8;ESR1;FGF1;FGF2;FGFR2;PLXND1;GATA3;GREM1;GDNF;FOXP1;GLI3;NR3C1;HIF1A;HOXA11;RBPJ;IHH;CXCR2;ILK;CXCL10;AR;AREG;KDR;KRAS;HES5;MIR21;TACSTD2;SMAD3;SMAD4;MDK;MET;MMP14;MYC;NOTCH1;NOTCH4;PAK1;PAX2;PGR;PIK3CD;WNT4;DLL4;MED1;PSEN1;SALL4;BCL2;BRD2;CCL11;SDC4;SFRP1;SFRP2;BMP4;BMP7;SOX9;SRC;HNF1B;TCF21;TGFB1;TGFB2;TNF;TWIST1;VDR;VEGFA;WT1…	13.4902	1.82e-58
GOBP_POSITIVE_REGULATION_OF_IMMUNE_EFFECTOR_PROCESS	KLRC4-KLRK1;RASGRP1;NOD1;CD226;LILRB1;PHB2;CD55;EPHB2;F2RL1;KLRK1;SIRT1;CADM1;NCR3;PTPN22;GATA2;GATA3;TBX21;ANXA1;HK1;HLA-B;HLA-DRB1;HLA-G;HSPD1;IFNG;IL1B;IL1R1;IL2;IL4;IL6;IL10;IL12B;IL12RB1;IL13;IL17A;IL18;ITGAM;USP17L2;KIR2DL4;ARG1;LGALS9;LTA;LYN;SH2D1A;MIR21;MBL2;MIF;MLH1;MSH2;MYB;NOS2;FOXP3;IL23A;ENPP3;TREM2;B2M;PTPRC;PVR;IL21;CCL19;STAT6;BTK;TGFB1;TLR3;TLR4;TNF;C3;CCR2;TYROBP;VAV1;XBP1;ZP3;…	16.0618	3.83e-57
GOBP_POSITIVE_REGULATION_OF_CHEMOTAXIS	DNM1L;CXCL13;CCR1;CCR7;CSF1;CSF1R;IL34;CX3CR1;S1PR1;EDN1;MEGF8;AIF1;F2RL1;F3;FGF2;FPR2;DAPK2;MSTN;HMGB1;IL4;IL6;CXCL8;CXCR2;IL16;CXCL10;ITGA2;KDR;LGALS9;SMAD3;MDK;MET;NTF3;NTRK3;SERPINE1;IL23A;PDGFRB;PGF;TREM2;MAPK1;MAPK3;PTN;RARRES2;CCL1;CCL5;CCL19;CCL21;CXCL12;SMOC2;WNK1;ADAM17;TGFB1;THBS1;CCR2;VEGFA;VEGFC;CXCR4;CASR;NRP1;ARTN;SLIT2;CD74	28.1485	8.33e-57
GOBP_RHYTHMIC_PROCESS	DNM1L;PPARGC1A;CLDN4;CREB1;CRH;PARP1;CSF2;CYP1B1;DDX5;AGRP;DRD2;EGR1;AHR;NR2F6;ESR1;EZH2;FOXO3;SIRT1;MTOR;FSHB;FSHR;NR5A1;MSTN;AMH;GHRH;GHRHR;GSK3B;ANXA1;HDAC1;HDAC2;ID2;IGF1R;INHBA;KISS1;LEP;LHCGR;MDK;MMP2;NGFR;NOS2;NOS3;NTRK2;OPRM1;OXTR;PCNA;PDGFRA;SERPINF1;PGR;PPARA;PPARG;AXL;MAPK8;RETN;PTEN;PTN;RORB;SLC6A4;BMPR1B;SLIT3;SRC;SRD5A1;KLF9;HNF1B;TGFB2;TGFB3;KLF10;TIMP4;TNF;TP53;TWIST1;ZP3;CASP3;NR…	14.1925	1.29e-56
GOBP_NEGATIVE_REGULATION_OF_APOPTOTIC_SIGNALING_PATHWAY	YAP1;LRRK2;CSF2;CTH;CTNNB1;CX3CR1;ENO1;EPO;AKT1;FGA;SIRT1;GDNF;GSK3B;GSTP1;HDAC1;HGF;HIF1A;ICAM1;IGF1;IL1A;IL1B;IL4;IL7;IL9;AR;ITGAV;LGALS3;MIR132;MIR17;MIR21;MIR210;MDM2;MIF;MMP9;MUC1;NFE2L2;NOS3;SERPINE1;PF4;PIK3CB;WNT4;PSEN1;ACKR3;PSMD10;PTGS2;BAX;RAF1;RB1;BCL2;RELA;BCL2L1;BDNF;CX3CL1;CXCL12;SFRP2;BMP4;SNAI2;SNAI1;SOD2;SRC;BRCA1;TERT;TGFBR1;THBS1;TNF;TPT1;XBP1;RNF34;PEA15;NRP1;CREB3L1;CD44;CD74	17.6458	1.36e-56
GOBP_POSITIVE_REGULATION_OF_DEFENSE_RESPONSE	KLRC4-KLRK1;RASGRP1;NOD1;CEBPA;CD226;LRRK2;CCR7;CNR1;ACE;AGT;AGTR1;ETS1;F2RL1;KLRK1;FPR2;CADM1;NCR3;PDCD4;HCK;HLA-G;HMGB1;IFNG;IL1B;IL2;IL6;IL12B;IL15;IL16;IL17A;IL18;IDO1;ITGA2;KIR2DL4;ARG1;LGALS1;LTA;LYN;SH2D1A;MIR126;MIR142;MIR21;MIR22;MBL2;MDK;MMP12;NFKBIA;NINJ1;SERPINE1;PAK1;IL23A;PIK3CG;PLA2G2A;TREM2;MED1;MAPK3;PTGER4;PTGS2;PVR;IL21;CCL1;CCL5;CX3CL1;SRC;BTK;TLR2;TLR3;TLR4;TNF;TNFRSF1A;C3;CC…	13.9406	3.99e-56
GOBP_MULTICELLULAR_ORGANISM_REPRODUCTION	ADA;BCL2L11;FST;CIB1;KHDRBS1;CFTR;LRRK2;CNR1;PARP1;CTNNB1;CYP1A1;CYP1B1;ACE;DNMT3A;AGRP;EDN1;EDNRA;EGR1;EPOR;ERCC1;AKT1;ESR1;FANCD2;FOXO3;SIRT1;CADM1;MTOR;FSHB;FSHR;NR5A1;GALNT3;NECTIN3;MSTN;AMH;GHRHR;GJA1;GJB2;HPGDS;GLI1;ANG;ANGPT2;GPX4;NR3C1;MSH6;DNMT3L;ANXA1;H2AX;HDAC2;HOXA10;HOXA11;HPGD;BIRC3;IGF1;IGF1R;IHH;IL1A;INHBA;AR;ITGB1;KISS1;ARG1;LEP;LGALS9;LHCGR;LIF;SMAD4;MAS1;MDK;MLH1;MMP2;MSH2;ATM;…	6.67436	4.44e-56
GOBP_CELLULAR_RESPONSE_TO_CHEMICAL_STRESS	PPARGC1A;CHUK;LRRK2;SIRPA;PARP1;CTNNB1;CYP1B1;DAPK1;EDN1;EDNRA;EGFR;AIF1;EPO;AKT1;EZH2;FANCD2;FOXO1;FOXO3;AKR1B1;SIRT1;FOS;MTOR;GBA;GJB2;FOXP1;ANXA1;HDAC2;HGF;HIF1A;APEX1;FAS;IL6;AQP1;IL10;AQP5;JUN;ARG1;ARNT;MIRLET7B;MIR132;MIR17;MIR195;MIR21;MIR34A;MET;MMP2;MMP3;MMP9;MPO;ATM;NFE2L2;NOS3;PAX2;PCNA;PDGFRA;PIK3CA;ERRFI1;TREM2;AXL;MAPK1;MAPK3;MAPK8;PTGS2;BCL2;RELA;SLC1A1;SLC2A1;SLC2A4;BMP7;SOD1;SOD2…	12.6549	5.62e-56
GOBP_REGULATION_OF_CELLULAR_COMPONENT_BIOGENESIS	BCL2L11;CDKN1B;YAP1;CXCL13;PDLIM5;PRRT2;LRRK2;CCR7;CLDN3;CLDN7;DOCK11;PARP1;CSF2;CSF3;CCN2;GPBAR1;ACE;DNMT1;AGT;S1PR1;EPHA3;EPHB2;ERCC1;ESR1;F2RL1;FKBP4;DKK1;NUP62;ALOX15;MTOR;LMOD1;POLDIP2;GBA;GREM1;MSTN;INTU;GSK3B;TMOD3;HCK;HMGB1;BIRC2;IAPP;ICAM1;IFNG;APOE;CCN1;IL1B;IL1RAP;IL17A;USP17L2;KDR;RHOC;RHOG;STMN1;LGALS3;LIMK1;MIR142;MIR17;MIR20A;MIR21;MIR214;TACSTD2;SMAD3;SMAD4;MAP2;MECP2;MET;MMP1;MMP…	6.41665	6.7e-56
GOBP_EXTRINSIC_APOPTOTIC_SIGNALING_PATHWAY	BCL2L11;YAP1;CIB1;CSF2;DAPK1;AGT;AGTR2;AKT1;FGA;FOXO3;GDNF;GPER1;PDIA3;GSK3B;GSTP1;HGF;ICAM1;IFI27;IFNG;IGF1;FAS;IL1A;IL1B;IL2;FASLG;IL4;IL7;INHBA;AR;ITGAV;LGALS3;SMAD3;KITLG;NGF;NOS3;SERPINE1;PF4;PPP2R1A;PTEN;PTPRC;BAX;RAF1;BCL2;RELA;BCL2L1;CX3CL1;SFRP1;SFRP2;BMP4;BMPR1B;SNAI2;SRC;BRCA1;TERT;TGFB1;TGFB2;TGFBR1;THBS1;TIMP3;TLR3;TNF;TNFRSF1A;TNFRSF1B;RNF34;PEA15;HYAL2;TNFSF10;NRP1;BCL10;IL33;ACVR1B	17.9172	1.83e-55
GOBP_CELL_PROJECTION_ORGANIZATION	UST;PLXNC1;ABCC4;PAK4;YAP1;CARM1;SEMA3C;CIB1;PDLIM5;CFL1;CTHRC1;LRRK2;CCR7;CNR1;ADM;CRABP2;CREB1;CRK;DOCK11;CRMP1;CSF1R;CTNNB1;ARX;DLX5;DPYSL2;DRD2;AGT;S1PR1;EDN1;EDNRA;MEGF8;AIF1;EPHA3;EPHB2;EPHB4;EPO;ERBB2;AKT1;ERCC6;EZH2;F2RL1;FGFR2;FKBP4;KIFAP3;DKK1;PLXND1;NEDD4L;FN1;DICER1;LPAR3;MTOR;GATA3;GBA;MSTN;GDNF;INTU;TNFRSF21;GLI3;MYLIP;GSK3B;HDAC2;HGF;HMGB1;HPRT1;TNC;ICAM1;APOE;IGF1R;IL2;IL6;ILK;INS…	4.98432	2.75e-55
GOBP_CELL_GROWTH	CDKN1A;CDKN1B;CDKN2A;PAK4;YAP1;SEMA3C;CIB1;PDLIM5;AKAP13;CRABP2;ADRA1A;CTNNB1;DPYSL2;AGT;HBEGF;AGTR1;AGTR2;EDN1;EDNRA;MEGF8;EGFR;ENO1;ERBB2;AKT1;ESR2;EXTL3;F2;NEDD4L;FN1;SIRT1;LPAR3;SH3BP4;MTOR;GREM1;GJA1;FOXP1;GSK3B;TNC;IGF1;APOE;IGFBP1;IGFBP3;IGFBP7;IL2;IL9;INHBA;ITGB1;L1CAM;LIMK1;MIR195;SMAD3;SMAD4;MAP2;MMP14;NGF;NRN1;ENPP1;PPARA;PPP2R1A;ATAD3A;PPT1;PSMD10;SEMA6A;CXCL16;RB1;BCL2;RGS4;BCL6;ROS1…	9.7177	2.88e-55
GOBP_BEHAVIOR	ADA;LILRB2;CLCN3;LRRK2;CNR1;CREB1;CRH;CRHR1;PARP1;CSF2;CX3CR1;ACE;DPP4;AGRP;DRD2;AGT;AGTR2;EGFR;EGR1;EPHB2;AKT1;FEN1;DKK1;PLCB1;FOS;MTOR;GATM;GBA;GDNF;GHRH;GHRHR;HPGDS;GLI3;NR3C1;HDAC2;HIF1A;FOXA2;HPRT1;IAPP;ID2;APOE;IDO1;INSR;ITGA5;ITGB1;KCNQ1;KRAS;LEP;LEPR;MDK;MECP2;MME;NGF;NTF3;NTF4;NTRK2;OPRM1;OXTR;P2RX3;SERPINF1;TREM2;PPARA;PPT1;MAPK1;ANKH;PSEN1;B2M;RETN;PTEN;PTGS2;PTN;BCL2;REN;BDNF;S100B;CC…	8.28218	3.51e-55
GOBP_REGULATION_OF_SYSTEM_PROCESS	ADA;ABCC9;MYL9;SCN11A;CHRM3;LRRK2;ADM;CRH;CRHR1;PARP1;ADRA1A;CCN2;ADRA2B;CYP19A1;ACE;DRD2;AGT;HBEGF;AGTR1;AGTR2;EDN1;EDNRA;AIF1;ENO1;F2R;F2RL1;FGA;FOXO1;FOXO3;DICER1;GBA;MSTN;GJA1;FOXP1;TNFRSF21;GPER1;GSTM2;HGF;NR4A1;APOA2;IGF1;APOE;IL1A;IL2;AQP1;IL10;INHA;INHBA;ITGA2;KCNQ1;KISS1;LEP;MIR143;MIR145;MIR17;MIR20A;MIR200C;MIR21;MIR214;SMAD3;SMAD4;MDM2;MECP2;MMP2;NOS1;NOS3;NOTCH1;OPRM1;OXTR;P2RX3;PIK3…	8.59758	4.24e-55
GOBP_MORPHOGENESIS_OF_A_BRANCHING_STRUCTURE	YAP1;SEMA3C;PHB2;LRRK2;ADM;CSF1;CTNNB1;DRD2;AGT;AGTR2;EDN1;EDNRA;EGF;ESR1;FGF1;FGF2;FGFR2;PLXND1;GREM1;GDNF;GLI3;HGF;HOXA11;HOXA13;IHH;IL10;ILK;AR;AREG;KDR;KRAS;TACSTD2;SMAD4;MDK;MET;MMP14;MYC;NOTCH1;NOTCH4;PAK1;PAX2;PDGFA;PGR;WNT4;DLL4;MED1;BCL2;CCL11;SFRP1;SFRP2;BMP4;BMP7;SNAI2;SOX9;SRC;HNF1B;TCF21;TDGF1;TNF;VDR;VEGFA;WT1;PAX8;CASR;NRP1;SLIT2;SEMA3E;HS3ST3B1	19.4016	5.3e-55
GOBP_CELL_CYCLE	SRA1;BCL2L11;KIF20A;CDK4;CDK6;CDKN1A;CDKN1B;CDKN2A;PAK4;CDKN3;CEBPA;CIB1;ZNRD2;TXNIP;KHDRBS1;CTCF;DCTN6;CFL1;LILRB1;BRD8;NUDT6;PHB2;CKS1B;ZFP42;MAPK14;CCN2;PDIK1L;CTNNB1;CYP1A1;DNMT3A;DRD2;DUSP1;EDN1;EDNRA;EGF;EGFR;AHR;EIF4EBP1;AIF1;ERCC1;ERCC2;AKT1;ERCC6;ESRRB;EZH2;FANCD2;FEN1;FGF2;FGFR2;FOXM1;PLCB1;SIRT1;ITGB3BP;NUP62;POLDIP2;GATA3;GATA6;GJA1;GLI1;GPER1;NR3C1;MSH6;GTF2H1;TMOD3;DNMT3L;ANXA1;H2AX…	4.61166	6.29e-55
GOBP_REGULATION_OF_BODY_FLUID_LEVELS	ADA;MYL9;AGR2;MTCO2P12;CFTR;HPSE;CHRM3;ADM;CPB2;CLDN4;CREB1;MAPK14;ADRA2B;DRD2;EDN1;EPHB2;F2;F2R;F2RL1;F3;FBLN1;FGA;AKR1B1;FN1;GBA;GHRHR;ANXA2;HIF1A;FOXA2;HSD11B2;APOE;IL6;AQP1;AQP2;IL18;ILK;AQP5;ITGA2;ITGB3;KNG1;STMN1;LYN;MET;NFE2L2;NME1;NOS3;OXTR;SERPINE1;SERPINB2;PDGFA;PDGFRA;PF4;PF4V1;SERPINA1;PIK3CA;PIK3CB;PIK3CG;PLAU;PLG;MED1;PRKCA;AXL;PRL;PRLR;CCND1;ACTB;WNK1;SRC;TACR1;THBS1;TLR4;SERPING1;…	11.2782	2.15e-54
GOBP_POSITIVE_REGULATION_OF_EPITHELIAL_CELL_MIGRATION	PDCD6;CIB1;MAPK14;AGT;HBEGF;EDN1;EGF;AKT1;ETS1;FGF1;FGF2;SIRT1;CAPN7;MTOR;GATA2;GATA3;FOXP1;ANGPT1;ANXA1;HIF1A;HMGB1;IFNG;ITGA2;ITGB3;JUN;KDR;MIR10B;MIR126;MIR132;MIR143;MIR200A;MIR21;MIR210;MIR27B;MIR30A;MIR31;MET;MMP9;MIR135B;MIR342;NFE2L2;NOS3;PIK3CB;PIK3CD;PIK3CG;PRKCA;PTGS2;SMOC2;BMP4;SOX9;SRC;ADAM17;TACR1;TDGF1;TEK;TGFB1;TGFB2;THBS1;VEGFA;VEGFC;WNT7A;IRS2;NRP1;HDAC9	21.7457	2.85e-54
GOBP_T_CELL_DIFFERENTIATION	ADA;RASGRP1;CDK6;LILRB2;CCR9;CCR7;CTLA4;CTNNB1;EGR1;ERBB2;FANCD2;FOXO3;IL27;MTOR;PTPN22;GATA3;GBA;FOXP1;GLI3;TBX21;ANXA1;HLA-DRB1;HLA-G;HMGB1;IFNG;IHH;IL1A;IL1B;IL2;IL2RA;IL4;IL6;IL7;IL7R;IL12B;IL12RB1;IL15;IL18;KLRC1;LEP;LEPR;LGALS9;MIR21;MDK;MYB;FOXP3;IL23A;PIK3CD;WNT4;DLL4;B2M;PTGER4;PTPRC;IL21;BCL2;ACTB;BCL6;CCL19;BMP4;SMARCC1;SOD1;BRAF;STAT3;STAT6;ADAM17;ZEB1;TP53;CCR2;VAV1;XBP1;ARID1A;FZD7;…	13.881	5e-54
GOBP_REGULATION_OF_NEUROGENESIS	PLXNC1;YAP1;SEMA3C;CRABP2;IL34;CTNNB1;CX3CR1;ACE;DRD2;MEGF8;EPHB2;EZH2;F2;FGF2;KIFAP3;PLXND1;FN1;DICER1;HEY1;LPAR3;MTOR;GLI3;GPER1;ANXA2;HDAC1;HDAC2;HIF1A;ID2;IFNG;IL1B;IL6;ITGB1;KRAS;HES5;L1CAM;LIF;LIMK1;LTA;LYN;MIR142;MIR181C;MAP2;MDK;MECP2;MME;NGF;NOTCH1;NTRK2;NTRK3;OPRM1;SERPINF1;TREM2;DLL4;MAP2K1;PSEN1;B2M;PTEN;SEMA6A;PTN;PTPRD;RB1;BDNF;CCL11;CX3CL1;CXCL12;GORASP1;BMP7;SPP1;BRAF;TGFB1;TSPO;T…	11.5325	7.04e-54
GOBP_POSITIVE_REGULATION_OF_LEUKOCYTE_PROLIFERATION	ADA;CDKN1A;LILRB2;FCRL3;CSF1;CSF1R;CSF2;IL34;CD55;AIF1;EPHB2;EPO;FCGR3A;PTPN22;CD274;ANXA1;HLA-DPB1;HMGB1;IGF1;IL1A;IL1B;IL2;IL2RA;IL4;IL6;IL7;IL12B;IL12RB1;IL13;IL15;IL18;LEP;LGALS9;LYN;MIR21;KITLG;MIF;FOXP3;IL23A;MAPK1;MAPK3;PRLR;PTPRC;IL21;BCL2;BCL2L1;BCL6;CCL5;CCL19;TACR1;BTK;TLR4;CCR2;TYK2;VCAM1;ZP3;CARD11;IRS2;WNT3A;CD86;CD40LG;CD74	22.8518	1.25e-53
GOBP_REGULATION_OF_ORGANELLE_ORGANIZATION	BCL2L11;DNM1L;CDKN1B;LILRB2;YAP1;CIB1;CTCF;PPARGC1A;AKAP13;PRRT2;LRRK2;CCR7;CRK;PARP1;CSF1R;CSF2;CSF3;CCN2;CTNNB1;DCN;DNMT1;DUSP1;S1PR1;EDN1;EGF;EPHA3;ERCC1;AKT1;F2RL1;FEN1;FKBP4;PLCB1;NUP62;ALOX15;MTOR;LMOD1;INTU;GPER1;GSK3B;TMOD3;ANXA1;ANXA2;HCK;HGF;HIF1A;HOXA13;BIRC5;IAPP;IGF1;IL1A;IL1B;IL1RAP;INSR;ITGB3;KDR;RHOC;RHOG;STMN1;LIF;LIMK1;MIR20A;MIR21;MIR214;TACSTD2;SMAD3;SMAD4;MAP2;MDK;MECP2;MET;M…	5.57874	1.97e-53
GOBP_RESPONSE_TO_REACTIVE_OXYGEN_SPECIES	TXNIP;CHUK;LRRK2;COL1A1;CRK;SIRPA;CYP1B1;EDN1;EGFR;AKT1;ERCC6;EZH2;FOXO3;SIRT1;FOS;FOXP1;GSTP1;ANXA1;HDAC2;HGF;HIF1A;HP;APEX1;APOE;IL1A;IL6;AQP1;IL10;JUN;AREG;ARG1;MIRLET7B;MIR17;MIR21;MIR34A;MET;MMP2;MMP9;MPO;NFE2L2;NOS3;PAX2;PCNA;PDGFRA;PDGFRB;AXL;MAPK1;MAPK3;MAPK8;BCL2;RELA;SDC1;BMP7;SOD1;SOD2;SRC;STAT6;TACR1;BTK;TXN;CASP3;CAT;AKR1C3;BECN1;HYAL2;CD36;CDK1	18.6828	2.15e-53
GOBP_REGULATION_OF_CELL_CYCLE	SRA1;BCL2L11;KIF20A;CDK4;CDK6;CDKN1A;CDKN1B;CDKN2A;CDKN3;CEBPA;CTCF;LILRB1;BRD8;NUDT6;PHB2;CKS1B;MAPK14;CCN2;CTNNB1;CYP1A1;DRD2;DUSP1;EDN1;EGF;EGFR;EIF4EBP1;AIF1;ERCC2;AKT1;ERCC6;EZH2;FANCD2;FEN1;FGF2;FGFR2;FOXM1;PLCB1;SIRT1;NUP62;POLDIP2;GATA3;GLI1;GPER1;GTF2H1;TMOD3;ANXA1;H2AX;HLA-G;NR4A1;HOXA13;HPGD;APEX1;BIRC2;BIRC3;BIRC5;ID2;IGF1;IGF1R;IL1A;IL1B;IL10;INHA;INHBA;INSR;ITGB1;JUN;USP17L2;LEP;LIF…	5.73182	2.52e-53
GOBP_STEROID_METABOLIC_PROCESS	CEBPA;CETP;CFTR;CYP2R1;ADM;CRH;CYP1A1;CYP1A2;CYP1B1;CYP2B6;CYP2C19;CYP3A4;TTC39B;CYP11A1;CYP17A1;CYP19A1;CYP26A1;AKR1C1;AKR1C2;EGR1;ESR1;FGF1;AKR1B1;SIRT1;FSHB;NR5A2;NR5A1;GBA;GC;NR3C1;HSD3B1;HSD3B2;HSD11B2;HSD17B1;HSD17B3;HSD17B2;APOA2;IFNG;APOE;IGF1R;IGFBP7;IL1A;IL4;LBR;LEP;LEPR;LHB;LHCGR;LIPC;LIPE;MIR30C1;MIR33A;STS;MECP2;NFKB1;HSD17B7;PDGFRA;WNT4;PON1;UGT2B28;UGT1A1;MED1;PRLR;SNAI2;SNAI1;SOD1…	12.7891	4.01e-53
GOBP_REGULATION_OF_NERVOUS_SYSTEM_DEVELOPMENT	PLXNC1;YAP1;SEMA3C;CRABP2;IL34;CTNNB1;CX3CR1;ACE;DRD2;MEGF8;EPHB2;AKT1;EZH2;F2;FGF2;KIFAP3;DKK1;PLXND1;FN1;DICER1;HEY1;LPAR3;MTOR;TNFRSF21;GLI3;GPER1;ANXA2;HDAC1;HDAC2;HGF;HIF1A;ID2;IFNG;IL1B;IL1RAP;IL6;ITGB1;KRAS;HES5;L1CAM;LIF;LIMK1;LTA;LYN;MIR142;MIR181C;MAP2;MDK;MECP2;MME;NGF;NOTCH1;NTRK2;NTRK3;OPRM1;OXTR;SERPINF1;TREM2;DLL4;MAP2K1;PSEN1;B2M;PTEN;SEMA6A;PTN;PTPRD;RB1;BDNF;CCL11;CX3CL1;CXCL12;…	9.90039	1.18e-52
GOBP_REGULATION_OF_PROTEOLYSIS	PDCD6;BCL2L11;NOD1;CEBPA;LRRK2;CPB2;CLDN4;CLDN3;CCN2;DAPK1;AGT;EGF;AHSG;ENO1;AKT1;F2;F2R;F3;FBLN1;FN1;SIRT1;RNF19A;GBA;GPER1;CCDC22;GSK3B;ANXA2;HDAC1;HDAC2;HGF;HMGB1;NR4A1;BIRC2;BIRC3;BIRC5;HSPD1;IFNG;APOE;CCN1;FAS;IL1B;FASLG;IL9;AQP1;IL10;USP17L2;KNG1;LGALS9;LPA;LTF;LYN;MIRLET7B;MIR126;MIR17;MIR195;MIR205;MIR21;MIR27B;MIR29C;SMAD3;MDM2;MMP9;MMP14;MYC;NFE2L2;NGF;NGFR;SERPINE1;SERPINB2;PAX2;SERPIN…	7.19479	1.45e-52
GOBP_POSITIVE_REGULATION_OF_HYDROLASE_ACTIVITY	PDCD6;BCL2L11;RASGRP1;NOD1;CXCL13;PHB2;FCRL3;LRRK2;CCR7;CLDN4;CLDN3;CRK;DOCK11;ADRA1A;CCN2;DAPK1;AGT;AGTR1;AGTR2;S1PR1;EDNRA;EGFR;ERBB2;AKT1;ESR1;EZH2;F2R;F2RL1;F3;FBLN1;FGF2;FGFR2;FLT1;FN1;SIRT1;MTOR;ANG;GPER1;GSK3B;HMGB1;HSPD1;IFNG;CCN1;FAS;FASLG;ITGA2;ITGB1;USP17L2;RHOC;RHOG;LGALS9;LYN;MIR17;MIR195;MIR205;MIR21;MIR27B;SMAD3;CD200;MYC;NGFR;NTF3;NTRK3;P2RY6;PCNA;PDGFRA;PDGFRB;WNT4;PPARG;MAPK8;PT…	8.3306	1.57e-52
GOBP_RESPONSE_TO_TUMOR_NECROSIS_FACTOR	CEBPA;CIB1;CHUK;COL1A1;MAPK14;CYP1B1;EDN1;AKT1;F2RL1;FOXO3;SIRT1;FOS;GATA3;GBA;ANKRD1;FOXP1;TNFRSF21;GPER1;GSTP1;BIRC2;BIRC3;FAS;CXCL8;ILK;MIR142;MIR27B;MIR30C2;MIR31;MIR34A;NFE2L2;NFKB1;NFKBIA;MAPK1;MAPK3;MAP2K7;PTGS2;CXCL16;RELA;CCL1;CCL2;CCL5;CCL11;CCL14;CCL16;CCL17;CCL19;CCL21;CCL22;CCL25;CX3CL1;SELE;SFRP1;SLC2A4;BRCA1;ADAM17;TDGF1;THBS1;TNF;TNFRSF1A;TNFRSF1B;TP53;VCAM1;TRPV1;ZFP36;CALCA;ACTN…	15.3575	1.61e-52
GOBP_NEGATIVE_REGULATION_OF_TRANSPORT	ADA;LILRB2;LILRB1;PRRT2;LRRK2;CNR1;CRH;CRHR1;SIRPA;CSK;ADRA2B;ACE;DRD2;EDN1;EGF;EPHA3;EPHB2;EPO;AKT1;F2R;FOXO1;NEDD4L;GJA1;ANGPT1;REM1;GSTM2;ANXA1;ANXA2;HMGB1;APOA2;APOE;IL1B;IL11;IL12B;INHA;INHBA;ITGAV;ITGB3;USP17L2;LEP;LGALS3;LGALS9;LIF;MIR143;MIR148A;MIR17;MIR200C;MIR205;MIR27B;MIR30C1;MIR33A;MIR34A;MAOB;MMP9;CD200;NFKB1;NOS1;NOS3;NOTCH1;OPRM1;OXTR;ENPP1;PRKCB;PSEN1;PSMD9;PTEN;PTGS2;MIR451A;BC…	9.52692	1.67e-52
GOBP_RESPONSE_TO_CORTICOSTEROID	BCL2L11;UCN3;COL1A1;ADM;PARP1;CCN2;CYP1B1;ACE;EDN1;AIF1;EPO;FOXO3;FOS;GBA;MSTN;GHRHR;GJB2;GPER1;NR3C1;ANXA1;HSD3B1;HSD3B2;HSD11B2;APOA2;IGF1R;IGFBP7;IL1RN;IL6;AQP1;IL10;AREG;ARG1;MAOB;MDK;NOTCH1;NTRK3;IL22;PAPPA;PCNA;SERPINF1;PIK3CA;ERRFI1;UGT1A1;PTGS2;CCND1;BCL2;SDC1;SLIT3;SRC;SRD5A1;SSTR4;STC1;KLF9;TNF;UCN;ZFP36;CASP3;AKR1C3;CLDN1;SLIT2;ADIPOQ	22.4628	1.83e-52
GOBP_REGULATION_OF_CELLULAR_LOCALIZATION	DNM1L;YAP1;CIB1;AGR2;KHDRBS1;CFTR;UCN3;LRRK2;CNR1;PARP1;MAPK14;CSK;CTNNB1;DRD2;EDNRA;EGF;EGFR;EPHA3;EPHB2;EPO;ERBB2;AKT1;F2;F2R;F2RL1;FGA;FOXO1;ASTN2;NEDD4L;NUP62;ANKRD1;GLI3;ANG;ANGPT1;GPER1;GSK3B;ANXA2;HIF1A;HLA-DRB1;FOXA2;IFI27;IFNG;IGF1;APOE;IL1A;IL1B;IL6;IL12B;IL13;AR;ITGAM;ITGB1;ITGB3;USP17L2;RHOG;LEP;LGALS3;LHCGR;LIF;MIR148A;MIR17;MIR210;MIR27B;MIR30C1;SMAD3;MAP2;MMP14;CD200;NGFR;NOS1;NOS2…	6.21421	7.26e-52
GOBP_SKELETAL_SYSTEM_DEVELOPMENT	CDX1;FST;LILRB1;AKAP13;OSR2;COL1A1;MAPK14;VCAN;CCN2;CTNNB1;DLX5;EDN1;EDNRA;MEGF8;AHSG;FBN1;FGF2;FGF9;FGFR2;GREM1;GH1;GJA1;FOXP1;GLI3;ANXA2;HIF1A;HOXA10;HOXA11;HOXA13;HOXB4;HSD17B1;IGF1;CCN1;IHH;INHA;ITGB8;KDR;HES5;LEP;LEPR;LOX;LTF;MIR21;SMAD2;SMAD3;MDK;MMP2;MMP9;MMP13;MMP14;TNFRSF11B;PDGFRA;MED1;BNC2;PRELP;MAPK3;SULF2;ANKH;PSEN1;PTGER4;PTPRC;RARB;RB1;SFRP1;SFRP2;BMP4;BMP7;BMPR1B;SNAI2;SNAI1;SOX9;…	8.73909	1e-51
GOBP_CELL_SUBSTRATE_ADHESION	BCL2L11;CDK6;CDKN2A;CIB1;AGR2;OLFM4;HPSE;CCR7;COL1A1;CRK;CSF1;CCN2;CTNNB1;CCDC80;EPHA3;FBLN1;FGA;FN1;ALOX15;ABI3BP;POLDIP2;GREM1;ANGPT1;ANGPT2;GSK3B;CCN1;ILK;ITGA2;ITGA5;ITGAM;ITGAV;ITGB1;ITGB3;ITGB8;KDR;L1CAM;LAMB1;MIR183;TACSTD2;MIR29C;SMAD3;MDK;MMP12;MMP14;MUC4;NOTCH1;SERPINE1;PIK3CB;PLAU;PLG;WNT4;AXL;PTEN;MIR503;RASA1;BCL2;BCL6;ROCK1;CCL21;CCL25;CX3CL1;SDC4;SFRP1;SRC;BRAF;TEK;THBS1;THY1;UTRN;…	11.2962	1.67e-51
GOBP_POSITIVE_REGULATION_OF_HEMOPOIESIS	ADA;RASGRP1;LILRB2;CCR1;CREB1;CSF1;IL34;FOXO3;FOS;GATA3;GLI3;ANXA1;HLA-DRB1;HLA-G;HMGB1;ID2;IFNG;IHH;IL2;IL2RA;IL4;IL7;IL7R;IL10;IL12B;IL12RB1;IL15;IL17A;IL18;LGALS1;LGALS3;LGALS9;LIF;MIR145;MIR21;MDK;KITLG;MMP14;MYB;FOXP3;IL23A;PF4;TREM2;PRKCA;AXL;PTPRC;RB1;ACTB;BCL6;CCL19;SMARCC1;BTK;TGFB1;KLF10;TNF;TYROBP;XBP1;DCSTAMP;ARID1A;RUNX1;RUNX3;CD86;CD74	19.6439	2.24e-51
GOBP_CIRCULATORY_SYSTEM_PROCESS	ADA;DNM1L;ABCC9;ABCC4;YAP1;UTS2;AKAP13;CHRM3;CNR1;ADM;CRP;ADRA1A;CCN2;ADRA2B;ACE;DRD2;AGT;HBEGF;AGTR1;AGTR2;EDN1;EDNRA;EPO;F2R;F2RL1;FGA;NEDD4L;SLC7A8;MTOR;GATA6;GJA1;ANGPT1;GPER1;GSTM2;HSD11B2;ID2;APOE;IL2;CXCR2;CXCL10;INSR;AR;KCNQ1;KNG1;LEP;LEPR;LPA;MIR17;MIR200C;MIR21;MIR27B;SMAD3;MDM2;MECP2;MMP2;NOS1;NOS2;NOS3;OXTR;PIK3CA;PIK3CG;DLL4;PPARA;PPARG;PTGS2;ACTA2;REN;RGS4;ROCK1;S100A1;CXCL12;SLC1A1…	8.04713	2.53e-51
GOBP_SIGNAL_RELEASE	ABCC4;CFTR;LILRB1;PRRT2;UCN3;LRRK2;CNR1;ADM;CREB1;CRH;CRHR1;ADRA1A;ADRA2B;CYP19A1;DRD2;AGT;AGTR1;EDN1;F2R;F2RL1;FGA;FOXO1;GATA3;GDNF;GHRH;GHRHR;GJA1;GNRHR;GPER1;GSK3B;ANXA1;HIF1A;HLA-DRB1;NR4A1;FOXA2;IFNG;IL1A;IL1B;IL1RN;IL6;AQP1;IL11;INHA;INHBA;KCNQ1;KISS1;LEP;LIF;LYN;MIR17;SMAD2;SMAD4;MAOB;MIF;NOS2;OPRM1;OXTR;PPARG;PPT1;PRKCB;PSEN1;RETN;PSMD9;PTGS2;RAF1;REN;CCL5;CXCL12;SFRP1;SLC6A4;SNCG;SPP1;BR…	9.47893	2.71e-51
GOBP_NEGATIVE_REGULATION_OF_DEFENSE_RESPONSE	ADA;ADAR;LILRB1;CD200R1;CRK;SIRPA;PARP1;MAPK14;CYP19A1;DRD2;FPR2;GATA3;GBA;GPER1;GSTP1;HCK;HGF;HLA-B;HLA-DRB1;HLA-G;IGF1;APOE;IL2;IL2RA;IL4;IL10;IL12B;IL13;KIR2DL4;KLRC1;ARG1;LGALS9;LYN;MIR126;MIR141;MIR142;MIR145;MIR181C;MIR195;MIR20A;MIR204;MIR205;MIR21;MIR30C2;MIR31;SMAD3;MDK;MMP12;CD200;NFKB1;NT5E;FOXP3;ENPP3;SERPINF1;TREM2;PPARA;PPARG;HTRA1;PTGER4;MIR488;PTPRC;RB1;CX3CL1;SOD1;SRC;TEK;SERPING…	14.1715	3.1e-51
GOBP_CELL_MORPHOGENESIS_INVOLVED_IN_DIFFERENTIATION	UST;PLXNC1;SEMA3C;CIB1;OLFM4;PDLIM5;CFL1;LRRK2;CLDN3;CRABP2;CREB1;CRK;CRMP1;CSF1R;CTNNB1;ARX;DLX5;DPYSL2;DRD2;EDN1;EDNRA;MEGF8;EPHA3;EPHB2;EPHB4;ERBB2;FBLN1;FGA;FGFR2;DKK1;PLXND1;NEDD4L;FN1;LPAR3;GATA3;GDNF;GLI3;GSK3B;HOXA13;HPRT1;APOE;IGF1R;IHH;ILK;AR;ITGAV;ITGB1;ITGB3;L1CAM;RHOG;LAMB1;LAMC2;STMN1;LIMK1;TACSTD2;SMAD4;MAP2;MDK;MET;NCAM1;NGF;NGFR;NOTCH1;NOTCH4;NTRK2;PAK1;PAX2;ROBO4;AXL;MAP2K1;PSEN…	7.18153	8.6e-51
GOBP_ENDOTHELIAL_CELL_PROLIFERATION	PDCD6;AGTR1;EGF;AKT1;F3;FGF2;FLT1;SIRT1;GATA2;ANG;ANGPT1;HIF1A;HMGB1;NR4A1;APOE;IL10;IL12B;ITGB3;JUN;KDR;ARG1;LEP;ARNT;MIRLET7B;MIR10B;MIR126;MIR132;MIR200C;MIR21;MIR22;MIR27B;MIR29C;MIR34A;MDK;MMP14;MIR135B;MIR342;NGFR;NRAS;PGF;PIK3CB;PIK3CD;DLL4;PPARG;PRKCA;MYDGF;PRL;MIR503;MIR483;CCL2;CCL11;CXCL12;BMP4;STAT3;ADAM17;TEK;NR2F2;TGFBR1;THBS1;TNF;VEGFA;VEGFC;VIP;PROK1;NRP1	17.7064	1.03e-50
GOBP_TUMOR_NECROSIS_FACTOR_SUPERFAMILY_CYTOKINE_PRODUCTION	RASGRP1;NOD1;LILRB1;LRRK2;SIRPA;CX3CR1;EPHB2;FCGR3A;DICER1;PTPN22;FOXP1;IL37;ANGPT1;CD274;GSTP1;HDAC2;HMGB1;IFNG;IFNGR1;IGF1;IL1A;IL4;IL6;IL10;IL12B;IL17A;LEP;LGALS9;LTF;MIR132;MIR195;MIR204;MIR27B;MIF;FOXP3;IL23A;PF4;ERRFI1;TREM2;AXL;PSEN1;MIR488;PTPRC;CCL19;CX3CL1;STAT3;BTK;THBS1;TSPO;TLR2;TLR3;TLR4;TWIST1;CCR2;TYROBP;ZFP36;BCL10;IL33;CD14;ADIPOQ;CD86;CD36;CD47	19.0238	1.03e-50
GOBP_LEUKOCYTE_MEDIATED_IMMUNITY	KLRC4-KLRK1;RASGRP1;CD226;LILRB1;CRK;CX3CR1;CD55;ACE;AHR;ERCC1;F2;F2RL1;FCGR3A;KLRK1;CADM1;NCR3;GATA2;GATA3;MSH6;TBX21;HLA-B;HLA-DPB1;HLA-DQB1;HLA-DRB1;HLA-G;HMGB1;HPRT1;HSPD1;ICAM1;CFI;IL1B;IL1R1;IL2;IL4;IL6;IL7R;IL9;IL10;IL12B;IL12RB1;IL13;IL18;ITGAM;KIR2DL4;KIR3DL1;KLRC1;ARG1;LEP;LGALS9;LTA;LYN;SH2D1A;MBL2;MLH1;MSH2;NOS2;FOXP3;IL23A;PIK3CD;PIK3CG;TREM2;B2M;PTPRC;PVR;IL21;BCL6;STAT6;ADAM17;BTK;…	9.58768	1.38e-50
GOBP_NEGATIVE_REGULATION_OF_CELLULAR_COMPONENT_ORGANIZATION	LILRB2;YAP1;CARM1;SEMA3C;CIB1;LILRB1;PRRT2;LRRK2;CLDN7;CRMP1;PARP1;ACE;DPP4;DUSP1;S1PR1;EPHA3;EPHB2;ERCC1;AKT1;FKBP4;DKK1;LMOD1;GBA;MYLIP;GSK3B;TMOD3;ANXA2;HDAC2;HGF;HMGB1;BIRC2;BIRC5;APOA2;IAPP;IGF1;APOE;IL1B;CXCL10;AR;ITGAV;ITGB3;STMN1;LGALS3;LIF;MIR142;MIR17;MIR20A;MIR205;MIR21;MIR210;MIR214;TACSTD2;MIR27B;MIR31;SMAD4;MAP2;MET;MMP14;MNAT1;ATM;NOTCH1;PIK3CA;PLK1;TREM2;PON1;PPARG;PSEN1;B2M;PSMD1…	7.15434	3.06e-50
GOBP_PROTEIN_CONTAINING_COMPLEX_ORGANIZATION	PDCD6;BCL2L11;MED16;DNM1L;CDKN1B;ADAR;YAP1;CIB1;CXCL13;CETP;CFL1;PPARGC1A;PRRT2;LRRK2;H4-16;CCR7;CLDN7;PARP1;CSF2;CSF3;CTH;AGT;HBEGF;AGTR1;EGF;EGFR;AIF1;ELAVL1;ESR1;F2RL1;FGA;FKBP4;KIFAP3;DKK1;FN1;DICER1;ITGB3BP;ALOX15;MTOR;LMOD1;GBA;GREM1;ANG;ANGPT1;GPX4;MED4;PDIA3;GSK3B;TMOD3;H2AX;HCK;ACACA;HLA-DPB1;HLA-DQB1;HLA-DRB1;HLA-G;HMGB1;HMGA1;HPRT1;BIRC2;HSPA4;HSPD1;APOA2;IAPP;IFNG;APOE;IGF1R;FAS;IL1RA…	4.36725	7.2e-50
GOBP_SMALL_MOLECULE_METABOLIC_PROCESS	ADA;DNM1L;CEBPA;MTCO2P12;CETP;CFTR;PPARGC1A;SMPDL3A;CYP2R1;LRRK2;CNR1;SGPP2;ADM;CRABP2;CRMP1;PARP1;MAPK14;CTH;CYP1A1;CYP1A2;CYP1B1;CYP2B6;CYP2C19;CYP3A4;TTC39B;CYP11A1;CYP17A1;CYP19A1;CYP26A1;AKR1C1;AKR1C2;DECR1;SARDH;DPYSL2;EDN1;EGR1;ENO1;AKT1;FGF1;FGF2;FOXO1;AKR1B1;PLCB1;FMO2;SIRT1;ALOX15;MTOR;FSHB;NR5A2;GALT;GATM;GBA;GC;HPGDS;GPER1;GPX4;NR3C1;GSTM1;GSTM2;GSTP1;ANXA1;HIF1A;HK1;ACACA;FOXA2;HPGD;…	4.35361	1.06e-49
GOBP_MUSCLE_CELL_DIFFERENTIATION	MYL9;PDLIM5;AKAP13;ADM;MAPK14;ADRA1A;CTH;CTNNB1;DNMT1;AGT;EDN1;EDNRA;AKT1;EZH2;FGF9;FGFR2;DKK1;SIRT1;HEY1;MTOR;LMOD1;GATA6;GREM1;ANKRD1;FOXP1;PDCD4;GPER1;TMOD3;HDAC1;ERVW-1;ID2;IGF1;RBPJ;IL4;CXCL10;ITGB1;KRAS;LAMB1;LOX;MIR100;MIR145;MIR195;MIR200B;MIR204;MIR21;MIR22;MIR34A;SMAD4;MDM2;MECP2;CXCL9;MMP14;NINJ1;NOS1;NOTCH1;YBX1;PDGFRA;PDGFRB;WNT4;PPARA;PTBP1;RARB;RB1;BCL2;RGS4;BDNF;SDC1;BMP4;SOD2;SOX…	10.1572	1.33e-49
GOBP_GLIOGENESIS	CDK6;NDRG1;MMP24;CSF1;CSF1R;CSK;IL34;CTNNB1;CX3CR1;ERBB2;ERCC2;AKT1;EZH2;F2;FGF2;DICER1;MTOR;GBA;TNFRSF21;GLI3;ANXA1;HDAC1;HDAC2;ID2;IFNG;IFNGR1;IL1B;IL6;ILK;AREG;KRAS;HES5;LAMB1;LEPR;LIF;LTA;LYN;MIR142;MIR181C;MDK;MECP2;MMP14;NOTCH1;NTRK2;NTRK3;PAX2;TREM2;MAPK1;MAPK3;MAP2K1;PSEN1;PTEN;PTN;RB1;CCL2;CX3CL1;SOD1;SOX2;SOX9;STAT3;TGFB1;TGFB2;TSPO;TLR2;TLR4;TNF;TNFRSF1B;TP53;CCR2;VEGFC;VIM;VTN;CXCR4;I…	12.3437	4.68e-49
GOBP_POSITIVE_REGULATION_OF_LEUKOCYTE_MIGRATION	DNM1L;CXCL13;CCR1;CCR7;CSF1;CSF1R;IL34;CX3CR1;EDN1;AIF1;F2RL1;FPR2;DAPK2;MSTN;HMGB1;ICAM1;IL1A;IL1R1;IL4;IL6;CXCL8;CXCR2;CXCL10;ITGA2;ITGB3;LGALS3;LGALS9;MDK;KITLG;MMP14;SERPINE1;IL23A;PGF;TREM2;MAPK1;MAPK3;PTN;RARRES2;CCL1;CCL5;CCL19;CCL21;CX3CL1;CXCL12;WNK1;ADAM17;TACR1;THBS1;THY1;TNF;CCR2;VEGFA;VEGFC;ZP3;CD47;CD74	23.2117	6.44e-49
GOBP_REGULATION_OF_DEVELOPMENTAL_GROWTH	BCL2L11;CDK4;CDKN1A;CDKN1B;YAP1;SEMA3C;AGR2;CRABP2;CREB1;MAPK14;CSF1;ARX;DPYSL2;DRD2;DUSP6;EDN1;MEGF8;AKT1;FGF2;FGF9;FGFR2;PLCB1;NEDD4L;FN1;LPAR3;GATA6;MSTN;GH1;GHRH;GHRHR;FOXP1;GLI1;GSK3B;IGF1;APOE;RBPJ;IL7;INSR;AR;L1CAM;LEP;LIMK1;MIR200B;MIR204;MAP2;NGF;NOTCH1;PIK3CA;PPARA;PRL;PTEN;SEMA6A;BCL2;RGS4;BDNF;CXCL12;BMP4;SLC6A4;SOD1;SOX15;SPP1;STAT3;SYT1;HNF1B;TGFBR1;VEGFA;EZR;WT1;ZP3;CXCR4;RUNX1;STC…	11.695	6.98e-49
GOBP_ION_TRANSPORT	ABCB6;DNM1L;ABCC9;ABCC4;CDKN1B;LILRB2;MTCO2P12;CFTR;LILRB1;SCN11A;CHRM3;PHB2;FCRL3;CLCN3;ANO4;CCR1;CCR5;CCR7;CNR1;SLCO6A1;CLDN4;CRH;CRHR1;CSF2;ADRA1A;CCN2;CNIH3;CTNNB1;ADRA2B;CYB5A;DAPK1;ACE;AKR1C1;DPP6;DRD2;AGT;EDN1;EDNRA;EGF;EPHB2;EPO;AKT1;F2;F2R;FGF2;FKBP4;NEDD4L;SLC7A8;GDNF;GJA1;GPER1;REM1;GSTM2;SLC40A1;ANXA1;ANXA2;IFNG;IL1A;IL1B;FASLG;AQP1;IL13;IL16;CXCL10;AQP9;ITGAV;ITGB1;ITGB3;KCNQ1;KCNQ2;…	4.61651	8.4e-49
GOBP_BRANCHING_MORPHOGENESIS_OF_AN_EPITHELIAL_TUBE	YAP1;PHB2;CSF1;CTNNB1;AGT;AGTR2;EDN1;EDNRA;EGF;ESR1;FGF1;FGF2;FGFR2;PLXND1;GREM1;GDNF;GLI3;HOXA11;IHH;ILK;AR;AREG;KDR;KRAS;TACSTD2;SMAD4;MDK;MET;MMP14;MYC;NOTCH1;NOTCH4;PAK1;PAX2;PGR;WNT4;DLL4;MED1;BCL2;CCL11;SFRP2;BMP4;BMP7;SOX9;SRC;HNF1B;TCF21;TNF;VDR;VEGFA;WT1;PAX8;CASR;NRP1;SLIT2;SEMA3E;HS3ST3B1	21.7522	1.44e-48
GOBP_REGULATION_OF_PEPTIDYL_TYROSINE_PHOSPHORYLATION	CSF1R;CSF2;CSF3;IL34;ADRA1A;ACE;AGT;HBEGF;EGF;EGFR;EPO;ERCC6;MTOR;GREM1;GH1;ANGPT1;HDAC2;HGF;IFNG;IGF1;IL2;IL4;IL6;IL7;IL9;IL11;IL12B;IL13;IL15;IL18;ITGA5;ITGB3;AREG;HES5;LEP;LIF;LYN;KITLG;MIF;NTF3;PDGFA;IL23A;ERRFI1;TREM2;PPP2R1A;PSEN1;PTPRC;IL21;CCL5;SFRP1;SFRP2;SHC1;SRC;ADAM17;TDGF1;TGFB1;THY1;TNF;TNFRSF1A;TP53;VEGFA;VTN;TSLP;HYAL2;NRP1;WNT3A;ADIPOQ;CD36;CD44;CD74	13.7609	1.57e-48
GOBP_EMBRYO_DEVELOPMENT_ENDING_IN_BIRTH_OR_EGG_HATCHING	ADA;PDCD6;BCL2L11;YAP1;CDX1;CEBPA;SEMA3C;CTHRC1;OSR2;COL1A1;ADM;CSF2;CTNNB1;ACE;EDN1;EDNRA;MEGF8;EGFR;ERCC2;AKT1;ESRRB;FGF2;FGF9;FGFR2;DKK1;HEY1;NR5A2;GABPA;GATA2;GATA3;GATA6;FOXD3;INTU;GLI3;ANGPT1;DNMT3L;HIF1A;HOXA11;HOXB4;HSD17B2;IGF1;CCN1;RBPJ;IHH;IL10;AR;ITGB1;HES5;LIF;ARNT;SMAD2;SMAD3;SMAD4;MMP14;MSH2;ATM;NOS3;NOTCH1;YBX1;PAX2;PDGFRA;PLG;POU5F1;MED1;MAPK1;SULF2;MAP2K1;PSEN1;SALL4;BCL2L1;BRD2…	7.22021	2.04e-48
GOBP_REGULATION_OF_CELL_SUBSTRATE_ADHESION	CDK6;CDKN2A;CIB1;AGR2;OLFM4;CCR7;COL1A1;CRK;CSF1;CCDC80;EPHA3;FBLN1;FGA;FN1;ALOX15;ABI3BP;POLDIP2;GREM1;ANGPT2;GSK3B;CCN1;ILK;ITGA5;ITGB3;KDR;MIR183;TACSTD2;MIR29C;SMAD3;MDK;MMP12;MMP14;NOTCH1;SERPINE1;PIK3CB;PLAU;PLG;WNT4;PTEN;MIR503;RASA1;BCL2;BCL6;ROCK1;CCL21;CCL25;CX3CL1;SDC4;SFRP1;SRC;BRAF;TEK;THBS1;THY1;UTRN;VEGFA;VTN;NDNF;ACTN4;FZD7;SKAP1;NRP1;CD36;SEMA3E;CDC42	15.8901	2.23e-48
GOBP_HOMEOSTASIS_OF_NUMBER_OF_CELLS	ADA;BCL2L11;CDK6;ADAR;CCR7;DOCK11;MAPK14;CSF1;CX3CR1;EPO;ERCC2;AKT1;ETS1;EZH2;F2R;FOXO3;GATA2;GATA3;GBA;TMOD3;SLC40A1;ANXA1;HIF1A;HMGB1;ID2;FAS;IL2;IL2RA;IL6;IL7;IL7R;CXCR2;INHA;INHBA;KCNQ1;KRAS;LGALS9;ARNT;LYN;KITLG;MIF;MYB;NOS3;NOTCH1;FOXP3;KLF13;PIK3CB;PIK3CD;PLA2G2A;MED1;AXL;ST6GALNAC1;B2M;BAX;RB1;BCL2;BCL6;BMP4;SOD1;SOX9;STAT3;ADAM17;BTK;THRA;VEGFA;ZFP36;CASP3;CARD11;BCL10;ACVR1B;SFXN1;CD74;…	12.5815	2.71e-48
GOBP_REGULATION_OF_VESICLE_MEDIATED_TRANSPORT	OLFM4;CFTR;LILRB1;PRRT2;LRRK2;CNR1;SIRPA;CSK;ADRA1A;DRD2;EGF;AHSG;EPHA3;F2RL1;FGA;DKK1;NEDD4L;FPR2;ALOX15;GATA2;GREM1;GH1;ANGPT1;GSK3B;ANXA1;ANXA2;HCK;HMGB1;APOA2;IFNG;APOE;IL1B;IL2RB;IL4;IL13;IL15;INSR;ITGA2;ITGAM;ITGAV;ITGB3;LGALS3;LGALS9;LYN;MIR17;MIR183;MIR20A;MIR205;MIR27B;MBL2;NOTCH1;NTF3;SERPINE1;PIK3CB;TREM2;PPT1;PRKCB;AXL;VPS11;MAPK1;MAPK3;MAP2K1;PSEN1;B2M;PTPRC;ROCK1;CCL2;CCL19;CCL21;SD…	8.20348	3.39e-48
GOBP_CELLULAR_RESPONSE_TO_OXIDATIVE_STRESS	PPARGC1A;CHUK;LRRK2;SIRPA;PARP1;CTNNB1;CYP1B1;DAPK1;EDN1;EDNRA;EGFR;AIF1;AKT1;EZH2;FANCD2;FOXO1;FOXO3;SIRT1;FOS;GBA;GJB2;FOXP1;ANXA1;HDAC2;HGF;HIF1A;APEX1;IL6;AQP1;IL10;JUN;ARG1;ARNT;MIRLET7B;MIR132;MIR17;MIR195;MIR21;MIR34A;MET;MMP2;MMP3;MMP9;MPO;NFE2L2;NOS3;PAX2;PCNA;PDGFRA;TREM2;AXL;MAPK1;MAPK3;MAPK8;BCL2;RELA;SLC1A1;BMP7;SOD1;SOD2;SRC;STAT6;BTK;TLR4;TNF;TP53;TXN;CAT;AKR1C3;BECN1;CD36;CDK1	12.7422	5.68e-48
GOBP_REGULATION_OF_LEUKOCYTE_CHEMOTAXIS	KLRC4-KLRK1;DNM1L;CXCL13;CCR1;CCR7;CSF1;CSF1R;IL34;CX3CR1;CYP19A1;DPP4;DUSP1;EDN1;AIF1;F2RL1;KLRK1;FPR2;DAPK2;GREM1;MSTN;HMGB1;IL4;IL6;CXCL8;CXCR2;CXCL10;LGALS9;LYN;MDK;MIF;SERPINE1;IL23A;PGF;MAPK1;MAPK3;PTN;RARRES2;CCL1;CCL2;CCL5;CCL19;CCL21;CXCL12;WNK1;ADAM17;THBS1;C5;CCR2;VEGFA;VEGFC;SLIT2;CD74	26.3684	1.21e-47
GOBP_MESENCHYME_DEVELOPMENT	PDCD6;YAP1;SEMA3C;COL1A1;CTNNB1;DDX5;EDN1;EDNRA;EPHA3;EZH2;FGF9;FGFR2;FN1;HEY1;MTOR;GATA3;GREM1;GDNF;AMH;PDCD4;GSK3B;HDAC2;HGF;HIF1A;FOXA2;IGF1;RBPJ;IL1B;IL6;MIR21;SMAD2;SMAD3;SMAD4;MDK;MDM2;KITLG;MIR342;MYC;NOS3;NOTCH1;NOTCH4;PAX2;PDGFRB;WNT4;BNC2;MAPK1;MAPK3;PTEN;SEMA6A;ACTA2;BCL2;ROCK1;S100A4;SFRP1;SFRP2;BMP4;BMP7;SNAI2;SNAI1;SOX9;TCF21;TGFB1;TGFB1I1;TGFB2;TGFB3;TGFBR1;TWIST1;WT1;HMGA2;NRP1;WN…	11.9129	1.53e-47
GOBP_T_CELL_PROLIFERATION	RASGRP1;LILRB2;LILRB1;CTLA4;CTNNB1;CD55;AIF1;EPO;ERBB2;CADM1;IL27;PTPN22;TNFRSF21;CD274;ANXA1;HLA-DPB1;HLA-DRB1;HLA-G;HMGB1;IGF1;IHH;IL1A;IL1B;IL2;IL2RA;IL4;IL6;IL10;IL12B;IL12RB1;IL15;IL18;IDO1;ARG1;LEP;LGALS3;LGALS9;MIR181C;MIR21;KITLG;FOXP3;IL23A;PIK3CG;WNT4;PTEN;PTPRC;BAX;IL21;BCL6;CCL5;CCL19;SDC4;BMP4;TNFRSF1B;TP53;CCR2;TYK2;VCAM1;ZP3;CASP3;CARD11;CD86;CD40LG	16.2087	2.29e-47
GOBP_POSITIVE_REGULATION_OF_SMOOTH_MUSCLE_CELL_PROLIFERATION	DNMT1;AGT;HBEGF;S1PR1;EDN1;AIF1;AKT1;FGF2;FGF9;FGFR2;GJA1;FOXP1;HDAC1;HPGD;ID2;IGF1;IGF1R;IL6;IL10;IL13;IL18;ITGA2;ITGB3;JUN;HES5;MIR17;MIR20A;MIR21;MIR214;MIR27B;MMP2;MMP9;MNAT1;MIR135B;P2RY6;PDGFRB;PIK3CA;PTGS2;CCL5;CX3CL1;BMP4;SRC;TERT;TGFB1;THBS1;TLR4;TNF	34.8825	3.12e-47
GOBP_POSITIVE_REGULATION_OF_CELL_DEVELOPMENT	PLXNC1;CIB1;OLFM4;CRABP2;CRK;IL34;CTNNB1;CX3CR1;ACE;DRD2;MEGF8;EPHB2;FGA;FGF2;PLXND1;FN1;DICER1;LPAR3;MTOR;GLI3;GPER1;HDAC1;HDAC2;HIF1A;HOXA11;ID2;IFNG;IL1B;IL6;ILK;ITGB1;ITGB3;KRAS;L1CAM;LIF;LIMK1;LTA;LYN;MIR142;MDK;MECP2;MME;NGF;NOTCH1;NTRK2;OPRM1;SERPINF1;MAP2K1;PTN;PTPRD;BCL2;BDNF;CX3CL1;CXCL12;BMP4;BRAF;TGFB1;TSPO;TLR2;CLDN5;TNF;TNFRSF1B;TYROBP;VEGFA;VEGFC;CXCR4;NRP1;WNT3A;IL33;S1PR2;SLIT2;A…	12.0439	3.34e-47
GOBP_VESICLE_MEDIATED_TRANSPORT	PDCD6;DNM1L;RASGRP1;ABCC4;OLFM4;CFTR;LILRB1;PRRT2;CLCN3;LRRK2;CCR1;CNR1;ADM;CRP;SIRPA;CSK;ADRA1A;CNIH3;CTNNB1;DPP4;DPYSL2;DRD2;EGF;AHSG;AIF1;EPHA3;EPHB2;F2RL1;FCGR3A;FGA;DKK1;NEDD4L;FPR2;SH3BP4;ALOX15;GATA2;GREM1;GH1;INTU;ANGPT1;ANK1;CCDC22;GSK3B;ANXA1;ANXA2;HCK;HMGB1;APOA2;CFI;IFNG;APOE;IGF1R;TICAM2;IL1B;IL2RB;IL4;CXCL8;CXCR1;CXCR2;IL13;IL15;INSR;ITGA2;ITGAM;ITGAV;ITGB1;ITGB3;RHOG;LEP;LEPR;LGALS…	4.46908	6.13e-47
GOBP_PHOSPHATIDYLINOSITOL_3_KINASE_SIGNALING	RASGRP1;CSF3;DCN;AGT;EDN1;EGF;EGFR;ERBB2;AKT1;F2;F2R;F2RL1;FCGR3A;FGF2;FLT1;FN1;SIRT1;FSHR;GATA3;GH1;ANGPT1;GPER1;HGF;IGF1;IGF1R;IL18;INSR;KDR;LEP;MIR126;MIR20A;MIR21;NTRK2;NTRK3;PDGFA;PDGFRA;PDGFRB;PIK3CA;PIK3CB;PIK3CD;PIK3CG;TREM2;MYDGF;PTEN;CCL5;SOX9;SRC;TEK;TGFB2;TNF;TWIST1;CAT;BECN1;SEMA3E	22.5883	9.02e-47
GOBP_POSITIVE_REGULATION_OF_ENDOTHELIAL_CELL_MIGRATION	PDCD6;CIB1;MAPK14;AGT;EDN1;EGF;AKT1;ETS1;FGF1;FGF2;SIRT1;GATA2;GATA3;FOXP1;ANGPT1;ANXA1;HIF1A;HMGB1;ITGB3;KDR;MIR10B;MIR126;MIR132;MIR143;MIR200A;MIR21;MIR210;MIR27B;MIR30A;MIR31;MET;MIR135B;MIR342;NFE2L2;NOS3;PIK3CB;PIK3CD;PIK3CG;PRKCA;PTGS2;SMOC2;BMP4;ADAM17;TDGF1;TEK;TGFB1;THBS1;VEGFA;VEGFC;WNT7A;NRP1;HDAC9	24.6915	1.37e-46
GOBP_REGULATION_OF_LIPID_METABOLIC_PROCESS	CDK4;PPARGC1A;PHB2;CCR7;CNR1;ADM;CREB1;TTC39B;EGR1;AKT1;F2;FGF1;FGF2;FLT1;FMO2;SIRT1;MTOR;FSHB;NR5A1;GPER1;NR3C1;ANXA1;HPGD;APOA2;ID2;HSD17B13;IFNG;APOE;IGF1R;IGFBP7;CCN1;IL1A;IL1B;LEP;LHCGR;LYN;MIR132;MIR204;MIR30C1;MIR33A;NFKB1;PDGFA;PDGFRA;PDGFRB;PIK3CG;TREM2;WNT4;PPARA;UGT1A1;PPARG;PTGS2;RARRES2;CCL19;CCL21;SNAI2;SNAI1;SOD1;SOX9;SRC;BRCA1;STAR;TEK;TGFB1;TSPO;THRA;TNF;C3;TWIST1;AKR1C3;IRS2;CD1…	10.8858	1.99e-46
GOBP_INTRACELLULAR_RECEPTOR_SIGNALING_PATHWAY	YAP1;CARM1;PHB2;PARP1;CYP26A1;DDX5;AHR;NR2F6;ESR1;ESR2;ESRRB;EZH2;FKBP4;SIRT1;ALOX15;NR5A2;NR5A1;PTPN22;GHRHR;FOXP1;GPER1;NR3C1;HDAC1;NR4A1;BIRC2;BIRC3;AR;USP17L2;LEP;ARNT;MIR34A;NR3C2;NFKBIA;PAK1;PGR;PPARA;PPARG;MED1;TRERF1;VPS11;AHRR;RARB;RELA;RORB;RXRA;SFRP1;SKP2;SNAI2;SRC;BRCA1;STAT3;TCF21;NR2F2;THRA;TLR4;NR2C1;NR2C2;TWIST1;VDR;RNF34;ACTN4;ARID1A;AKR1C3;NCOA1;NR1I2;CLOCK;NCOR1;NR1D2	13.1418	3.79e-46
GOBP_MALE_SEX_DIFFERENTIATION	BCL2L11;ZFP42;CTNNB1;CYP1B1;ACE;ERCC1;ESR1;FGF9;FKBP4;FSHB;FSHR;NR5A1;GATA3;GATA6;AMH;AMHR2;HOXA10;HOXA11;HOXA13;HSD17B3;IL1A;INHA;INHBA;INSR;AR;LHB;LHCGR;SMAD4;MAS1;KITLG;MMP14;MSH2;PDGFA;PDGFRA;PDGFRB;WNT4;BAX;CCND1;BCL2;REN;BCL2L1;SDC1;SFRP1;SFRP2;SOX9;SOX15;SRD5A1;SRD5A2;SRY;TCF21;TGFB2;TGFBR1;TLR3;WT1;UTF1;AKR1C3;TNFSF10	19.0759	3.92e-46
GOBP_REGULATION_OF_LEUKOCYTE_MEDIATED_IMMUNITY	KLRC4-KLRK1;RASGRP1;CD226;LILRB1;CRK;CX3CR1;CD55;AHR;F2RL1;KLRK1;CADM1;NCR3;GATA2;GATA3;TBX21;HLA-B;HLA-DRB1;HLA-G;HMGB1;HSPD1;ICAM1;IL1B;IL1R1;IL2;IL4;IL6;IL7R;IL10;IL12B;IL12RB1;IL13;IL18;ITGAM;KIR2DL4;KLRC1;ARG1;LEP;LGALS9;LTA;LYN;SH2D1A;MLH1;MSH2;NOS2;FOXP3;IL23A;TREM2;B2M;PTPRC;PVR;IL21;BCL6;STAT6;BTK;TGFB1;TLR3;TLR4;TNF;TNFRSF1B;C3;CCR2;TYROBP;VAV1;ZP3;IL18R1	14.0904	9.51e-46
GOBP_INOSITOL_LIPID_MEDIATED_SIGNALING	RASGRP1;CSF1R;CSF3;DCN;AGT;EDN1;EGF;EGFR;ERBB2;AKT1;F2;F2R;F2RL1;FCGR3A;FGF2;FLT1;PLCB1;FN1;SIRT1;FSHR;GATA3;GH1;ANGPT1;GPER1;HGF;IGF1;IGF1R;IL18;INSR;KDR;LEP;MIR126;MIR20A;MIR21;NTRK2;NTRK3;PDGFA;PDGFRA;PDGFRB;PIK3CA;PIK3CB;PIK3CD;PIK3CG;PLCB4;TREM2;MYDGF;PTEN;CCL5;SOX9;SRC;TEK;TGFB2;TNF;TWIST1;EZR;CAT;BECN1;SEMA3E	17.8581	1.2e-45
GOBP_CELL_FATE_COMMITMENT	CTNNB1;ARX;EDN1;EDNRA;FGF2;FGFR2;DKK1;MTOR;GATA2;GATA3;GATA6;GLI3;TBX21;HDAC1;HDAC2;FOXA2;HOXA11;HOXA13;ID2;RBPJ;IHH;IL6;IL7;IL12B;IL12RB1;AR;ITGB1;KDR;HES5;SMAD2;SMAD4;NOTCH1;NOTCH4;NTF4;NTRK3;PAX2;FOXP3;IL23A;WNT4;DLL4;POU5F1;PPARG;PSEN1;BCL2;SFRP1;SFRP2;BMP4;SOX2;SOX9;BRAF;STAT3;STAT6;HNF1B;TCF3;NR2F2;TGFB1I1;TGFBR1;TP53;WNT7A;WT1;NANOG;FZD7;CASP3;NRP1;WNT3A;MTA1;MTA2;GDF3;CDC42	12.4624	1.48e-45
GOBP_LEUKOCYTE_APOPTOTIC_PROCESS	ADA;BCL2L11;CDKN2A;LILRB1;CCR7;AKT1;KIFAP3;SIRT1;FOXP1;TNFRSF21;GLI3;CD274;ANXA1;HIF1A;FAS;IL2;IL2RA;FASLG;IL6;IL7R;CXCR2;IL10;IDO1;LGALS3;LGALS9;LYN;KITLG;MIF;PDCD1;PIK3CB;PIK3CD;AXL;PTEN;BAX;BCL2;BCL2L1;BCL6;CCL5;CCL19;CCL21;CXCL12;BMP4;ADAM17;BTK;TP53;CASP3;IRS2;BCL10;CD74	27.3171	1.49e-45
GOBP_POSITIVE_REGULATION_OF_PEPTIDYL_TYROSINE_PHOSPHORYLATION	CSF1R;CSF2;CSF3;IL34;ADRA1A;ACE;AGT;HBEGF;EGF;EGFR;EPO;ERCC6;MTOR;GREM1;GH1;ANGPT1;HDAC2;HGF;IFNG;IGF1;IL2;IL4;IL6;IL11;IL12B;IL13;IL15;IL18;ITGA5;ITGB3;AREG;HES5;LEP;LIF;LYN;KITLG;MIF;NTF3;IL23A;TREM2;PTPRC;IL21;CCL5;SRC;ADAM17;TDGF1;TGFB1;TNF;TNFRSF1A;TP53;VEGFA;VTN;TSLP;NRP1;WNT3A;ADIPOQ;CD36;CD44;CD74	16.8226	3.16e-45
GOBP_NEGATIVE_REGULATION_OF_PHOSPHORUS_METABOLIC_PROCESS	CDKN1A;CDKN1B;CDKN2A;ADAR;CEBPA;CIB1;LRRK2;SIRPA;PARP1;CSK;DRD2;AGT;DUSP1;DUSP6;EPHB2;AKT1;FBLN1;DKK1;SIRT1;NUP62;PTPN22;GBA;GREM1;MSTN;PDCD4;ANGPT1;GSK3B;GSTP1;HGF;FOXA2;IFNG;APOE;IGFBP3;IL1B;IL2;INHA;INHBA;JUN;LGALS3;LYN;MIR132;MIR20A;MIR27B;MIR30C1;MIR34A;MAS1;NTF3;NTRK3;PDGFA;ENPP1;PIK3CB;PLK1;ERRFI1;PPARA;PPARG;PPP2R1A;PSEN1;PTEN;PTPRC;BAX;RB1;ROCK1;MIR483;SFRP1;SFRP2;BMP4;BMP7;STAT3;NR2F2;T…	8.98243	5.06e-45
GOBP_BLOOD_VESSEL_ENDOTHELIAL_CELL_MIGRATION	CIB1;MAPK14;CYP1B1;AGTR2;EPHB4;AKT1;ETS1;FGF2;SIRT1;GATA2;GREM1;ANGPT1;ANGPT2;ANXA1;HIF1A;HMGB1;NR4A1;APOE;ITGB1;KDR;MIR10B;MIR126;MIR132;MIR143;MIR20A;MIR200A;MIR200B;MIR200C;MIR204;MIR210;MIR22;MIR27B;MIR29C;MIR30A;MIR31;MECP2;MIR135B;MIR342;NFE2L2;NOS3;NOTCH1;DLL4;PPARG;PRKCA;PTGS2;MIR503;MIR483;ADAM17;TDGF1;TGFB1;THBS1;TNF;VEGFA;VEGFC;NRP1;SLIT2;HDAC9	17.9702	5.18e-45
GOBP_PROTEOLYSIS	PDCD6;BCL2L11;NOD1;CEBPA;MMP24;LRRK2;CPB2;CLDN4;CLDN3;CPM;PARP1;CCN2;CTNNB1;DAPK1;ACE;CFD;DPP4;DPP6;AGT;EGF;AHSG;ENO1;AKT1;F2;F2R;F3;FBLN1;FGA;NEDD4L;FN1;SIRT1;CAPN7;RNF19A;GBA;GLI3;GPER1;CCDC22;MYLIP;GSK3B;TBX21;ANXA2;HDAC1;HDAC2;HGF;HMGB1;NR4A1;HP;BIRC2;BIRC3;BIRC5;HSPD1;CFI;IFI27;IFNG;APOE;CCN1;IHH;FAS;IL1B;FASLG;IL9;AQP1;IL10;USP17L2;KNG1;LGALS9;LPA;LTF;LYN;MIRLET7B;MIR126;MIR17;MIR195;MIR205…	4.16621	5.55e-45
GOBP_CELLULAR_RESPONSE_TO_PEPTIDE_HORMONE_STIMULUS	CDK4;CRHR1;CRHR2;CRK;PARP1;CSK;CYP1B1;CYP11A1;AGT;AGTR1;AGTR2;EDN1;EDNRA;AHSG;AKT1;FBN1;FOXO1;PLCB1;SIRT1;FOS;MSTN;GH1;GHRHR;GJB2;GNRHR;GPER1;GSK3B;NR4A1;APEX1;IGF1R;IGFBP1;IL1B;INHBA;INSR;ITGB3;JAK1;ARG1;LEP;LHCGR;LYN;MIR143;MIR145;MIR195;MAS1;NFE2L2;NFKB1;ENPP1;PIK3CA;ERRFI1;PPARG;PRKCB;RARRES2;RB1;RELA;ROCK1;SHC1;SLC2A4;SMARCC1;SRC;SRD5A1;STAT3;STAT6;TYK2;XBP1;CA2;BCAR3;NCOA1;IRS2;ADIPOQ;HDAC9…	11.5435	5.99e-45
GOBP_STEM_CELL_DIFFERENTIATION	PDCD6;CDK6;YAP1;SEMA3C;MAPK14;CTNNB1;ACE;EDN1;EDNRA;ERCC2;ESR1;ESRRB;EZH2;FGF2;FGFR2;FN1;GATA6;GREM1;GDNF;GSK3B;DNMT3L;HDAC1;HDAC2;HIF1A;HOXB4;RBPJ;ITGB1;HES5;LIF;TACSTD2;EPCAM;SMAD4;KITLG;NFE2L2;NOTCH1;PAX2;PDGFRA;MED1;MAPK1;MAPK3;SEMA6A;PTN;PTPRC;BCL2;SFRP1;SFRP2;BMP4;BMP7;SNAI2;SOX9;STAT3;HNF1B;TGFB2;TP53;TWIST1;WNT7A;ZFP36;HMGA2;NRP1;WNT3A;MTA1;MTA2;HAND2;SEMA3E;CDC42	13.5531	6.83e-45
GOBP_SENSORY_ORGAN_DEVELOPMENT	BCL2L11;TSHZ1;CDKN1B;CEBPA;CTHRC1;OSR2;CTNNB1;CYP1A1;CYP1B1;DLX5;DRD2;EDN1;EDNRA;EGFR;EPHB2;ESRRB;FBN1;FGF2;FGF9;FGFR2;ZHX2;FLT1;FJX1;NECTIN3;GATA2;GATA3;GJB2;INTU;GLI3;HDAC1;HDAC2;HIF1A;HOXA13;RBPJ;IHH;FASLG;AQP1;AQP5;INHBA;JUN;KCNQ1;KDR;HES5;SMAD3;NHS;NOTCH1;NTF4;NTRK2;NTRK3;PAX2;PDGFA;PDGFRA;PDGFRB;SERPINF1;DLL4;MED1;BNC2;MAPK1;MAPK3;PSEN1;BAX;NECTIN1;RARB;BCL2;RORB;SDC4;SLC1A1;BMP4;BMP7;BMPR1…	7.57754	9.52e-45
GOBP_RESPONSE_TO_ESTRADIOL	BCL2L11;CDKN1B;TXNIP;COL1A1;CCN2;CTNNB1;CYP1B1;CYP19A1;DNMT3A;AGT;EGFR;ESR1;ESR2;EZH2;GH1;GJB2;GPER1;GPX4;ANXA1;HPGD;IGF1R;IHH;IL10;ITGA2;AREG;LEP;MMP2;OGG1;OXTR;PCNA;PDGFA;PDGFRB;UGT1A1;PTGFR;PTGS2;CCND1;SFRP1;SLC6A4;BMP7;SRD5A1;SSTR1;STAT3;TACR1;NR2F2;TGFB1;UCN;WNT7A;CASP3;CAT	25.7976	1.11e-44
GOBP_POSITIVE_REGULATION_OF_GROWTH	YAP1;CIB1;AGR2;CRABP2;CREB1;MAPK14;CSF1;ARX;DRD2;HBEGF;EDN1;MEGF8;EGFR;ERBB2;AKT1;EXTL3;F2;FGF2;FGF9;FGFR2;PLCB1;NEDD4L;FN1;LPAR3;MTOR;GATA6;GH1;GHRH;GHRHR;GLI1;IGF1;IGFBP1;RBPJ;IL2;IL7;IL9;INSR;L1CAM;LEP;LIMK1;MIR204;MMP14;NGF;NOTCH1;PSMD10;CXCL16;BCL2;BDNF;CXCL12;SFRP1;SFRP2;SOX15;SYT1;ADAM17;TGFB2;TGFBR1;UCN;VEGFA;EZR;WT1;ZP3;CXCR4;NRP1;WNT3A;CDK1;CDC42	12.9944	1.32e-44
GOBP_GRANULOCYTE_MIGRATION	DNM1L;OLFM4;CXCL13;CCR7;CSF1;CSF1R;IL34;DPP4;EDN1;DAPK2;MSTN;CXCL1;ANXA1;IL1A;IL1B;IL1R1;IL4;CXCL8;CXCR1;CXCR2;IL17A;CXCL10;RHOG;LGALS3;MDK;CXCL9;IL23A;PF4;PF4V1;PIK3CD;PIK3CG;MAPK1;MAPK3;PTGER4;RARRES2;CCL1;CCL2;CCL5;CCL11;CCL14;CCL16;CCL17;CCL19;CCL21;CCL22;CCL25;CXCL5;CX3CL1;BSG;TGFB2;THBS1;VAV1;SLIT2;CD74	19.7598	1.96e-44
GOBP_ADAPTIVE_IMMUNE_RESPONSE_BASED_ON_SOMATIC_RECOMBINATION_OF_IMMUNE_RECEPTORS_BUILT_FROM_IMMUNOGLOBULIN_SUPERFAMILY_DOMAINS	ADA;CXCL13;CD226;LILRB1;CD55;AHR;EPHB2;ERCC1;FCGR3A;CADM1;IL27;MTOR;GATA3;CD274;MSH6;TBX21;ANXA1;HLA-B;HLA-DPB1;HLA-DQB1;HLA-DRB1;HLA-G;HMGB1;HPRT1;HSPD1;ICAM1;CFI;IL1B;IL1R1;IL2;IL4;IL6;IL7R;IL9;IL10;IL12B;IL12RB1;IL18;KLRC1;ARG1;LTA;MIR21;MBL2;MLH1;MSH2;NOTCH1;FOXP3;IL23A;TREM2;B2M;PTPRC;PVR;BCL6;CCL19;STAT3;STAT6;ADAM17;BTK;TGFB1;TLR4;SERPING1;TNF;TNFRSF1B;C1R;C3;C5;CCR2;TYK2;C9;ZP3;IL18R1;BCL…	10.0655	2.2e-44
GOBP_REGULATION_OF_ION_TRANSPORT	ABCC9;LILRB2;CFTR;LILRB1;SCN11A;CHRM3;PHB2;FCRL3;CCR1;CNR1;CRH;CRHR1;CNIH3;CTNNB1;ADRA2B;DAPK1;ACE;DPP6;DRD2;AGT;EDN1;EDNRA;EGF;EPHB2;EPO;AKT1;F2;F2R;NEDD4L;GDNF;GPER1;REM1;GSTM2;IFNG;IL1A;IL1B;IL13;IL16;CXCL10;ITGB1;ITGB3;KCNQ1;KCNQ2;ARG1;LEP;LGALS3;LHCGR;LYN;MIR200C;MIR21;MIR210;MIR33A;MIR34A;MAOB;MIF;CXCL9;MMP9;NOS1;NOS3;OPRM1;OXTR;P2RX3;P2RX5;P2RY6;PDGFRB;PIK3CG;TREM2;PSEN1;B2M;PTGS2;BAX;BCL2…	6.57919	2.28e-44
GOBP_NEURON_APOPTOTIC_PROCESS	BCL2L11;PPARGC1A;PARP1;CTNNB1;CX3CR1;AGTR2;F2R;FOXO3;PLXND1;GATA3;GBA;GDNF;TNFRSF21;ANGPT1;NR3C1;HIF1A;APOE;FAS;FASLG;IL10;ITGAM;JUN;KDR;KRAS;MIR181C;MIR200A;MDK;MECP2;MSH2;ATM;NGF;NGFR;NTF3;NTF4;NTRK2;PIK3CA;TREM2;PPT1;AXL;MAP2K7;PSEN1;BAX;RASA1;RB1;CCND1;BCL2;BCL2L1;ROCK1;BDNF;CCL2;CX3CL1;SLC1A1;SOD1;SOD2;BRAF;TERT;TGFB2;TGFB3;TNF;TP53;TYROBP;NDNF;CASP3;NRP1;SEMA3E	13.1934	2.67e-44
GOBP_LYMPHOCYTE_MEDIATED_IMMUNITY	KLRC4-KLRK1;RASGRP1;CD226;LILRB1;CRK;CD55;AHR;ERCC1;FCGR3A;KLRK1;CADM1;NCR3;GATA3;MSH6;TBX21;HLA-B;HLA-DPB1;HLA-DQB1;HLA-DRB1;HLA-G;HMGB1;HPRT1;HSPD1;ICAM1;CFI;IL1B;IL1R1;IL2;IL4;IL6;IL7R;IL9;IL10;IL12B;IL12RB1;IL18;KIR2DL4;KIR3DL1;KLRC1;ARG1;LEP;LGALS9;LTA;SH2D1A;MBL2;MLH1;MSH2;FOXP3;IL23A;TREM2;B2M;PTPRC;PVR;IL21;BCL6;STAT6;BTK;TGFB1;SERPING1;TNF;TNFRSF1B;C1R;C3;C5;CCR2;C9;VAV1;ZP3;ULBP3;ULBP2;…	10.2021	3.47e-44
GOBP_MUSCLE_SYSTEM_PROCESS	ADA;ABCC9;MYL9;PDLIM5;UTS2;AKAP13;CHRM3;LTB4R;PARP1;ADRA1A;CCN2;ADRA2B;DRD2;AGT;EDN1;EDNRA;AIF1;ENO1;EZH2;F2R;FOXO1;FOXO3;NEDD4L;MTOR;LMOD1;GATA6;GATM;MSTN;GDNF;GJA1;FOXP1;GPER1;GSTM2;TMOD3;HDAC2;NR4A1;IGF1;IL1B;IL15;ITGA2;KCNQ1;LEP;MIR143;MIR145;MIR17;MIR195;MIR20A;MIR200C;MIR21;MIR214;SMAD3;SMAD4;NOS1;NOS3;NOTCH1;OXTR;P2RX3;PIK3CA;PIK3CG;ERRFI1;PPARA;PPARG;PRKCA;SULF2;PTGS2;ACTA2;RGS4;ROCK1;SOD…	8.71318	3.66e-44
GOBP_NEGATIVE_REGULATION_OF_NEURON_DEATH	PPARGC1A;LRRK2;CD200R1;CSF1;CSF3;CTNNB1;CX3CR1;EPO;AKT1;F2R;PLXND1;SIRT1;GBA;GDNF;ANGPT1;GSK3B;HIF1A;APOE;IL10;IL13;JUN;KDR;KIR3DL2;KRAS;MIR181C;MIR200C;MDK;MECP2;CD200;MSH2;NGF;NTF3;NTF4;NTRK2;SERPINF1;PIK3CA;PPARA;PPT1;AXL;PSEN1;BAX;RASA1;CCND1;BCL2;BCL2L1;ROCK1;BDNF;CCL2;CX3CL1;SLC1A1;SOD1;SOD2;BRAF;TERT;TGFB3;TNFRSF1B;UCN;NDNF;NRP1;WNT3A;SEMA3E	14.8581	3.67e-44
GOBP_HORMONE_MEDIATED_SIGNALING_PATHWAY	YAP1;CARM1;PHB2;UCN3;CRHR1;CRHR2;PARP1;DDX5;AGRP;ESR1;ESR2;ESRRB;FKBP4;SIRT1;FSHR;NR5A2;NR5A1;GHRHR;FOXP1;GPER1;NR3C1;GTF2H1;HDAC1;AR;LHB;LHCGR;NR3C2;PAK1;PGR;PPARA;PPARG;MED1;TRERF1;VPS11;PRLR;RARB;RXFP1;REN;RXRA;SFRP1;SKP2;BMP4;BMP7;SRC;BRCA1;SST;SSTR1;SSTR4;TCF21;THRA;NR2C1;TRH;ARID1A;NCOA1;UCN2;CLOCK;NCOR1;NR1D2	16.5227	3.79e-44
GOBP_NEGATIVE_REGULATION_OF_INFLAMMATORY_RESPONSE	ADA;CD200R1;SIRPA;MAPK14;CYP19A1;FPR2;GATA3;GBA;GPER1;GSTP1;HCK;HGF;HLA-DRB1;IGF1;APOE;IL2;IL2RA;IL4;IL10;IL12B;IL13;LYN;MIR126;MIR141;MIR142;MIR145;MIR181C;MIR195;MIR20A;MIR204;MIR205;MIR30C2;MIR31;SMAD3;MDK;CD200;NFKB1;NT5E;FOXP3;ENPP3;SERPINF1;TREM2;PPARA;PPARG;PTGER4;MIR488;PTPRC;RB1;CX3CL1;SOD1;SRC;TEK;TNFRSF1A;TNFRSF1B;ZFP36;ADIPOQ;NR1D2	17.1195	4.27e-44
GOBP_GLAND_MORPHOGENESIS	SEMA3C;PHB2;CPB2;CSF1;CSF1R;EGFR;ESR1;FGF1;FGFR2;PLXND1;GLI1;GLI3;NR3C1;HGF;HOXA13;TNC;IL6;AR;AREG;ARG1;MDK;MMP2;NFKB1;NOTCH1;PDGFA;PGR;WNT4;MED1;PTN;BAX;RXFP1;BCL2;CCL11;SFRP1;BMP4;BMP7;SNAI2;SOX9;SRC;STAT6;TGFB1;TGFB2;TGFB3;TNF;VDR;EZR;XBP1;NRP1;WNT3A	24.754	4.74e-44
GOBP_AGING	CARM1;CNR1;ADM;ADRA1A;CCN2;CYP1A1;ACE;DNMT3A;AGT;EDN1;EDNRA;EPO;ERCC1;ERCC2;FGF2;FOXO3;FOS;NR5A1;AMH;GJB2;GPX4;APEX1;IGF1R;IGFBP1;IL10;IL15;INHBA;ARG1;SMAD4;MME;MMP2;MPO;NFE2L2;OGG1;PAX2;PDGFRB;SERPINF1;RETN;PTGS2;CX3CL1;SRR;SOD1;SOD2;TGFB3;TSPO;TIMP1;SERPING1;TNFRSF1B;VCAM1;CALCA;CAT;BECN1;HYAL2;CLDN1;CD68	18.3736	6.59e-44
GOBP_MYELOID_LEUKOCYTE_ACTIVATION	RASGRP1;NDRG1;CEBPA;CD226;LRRK2;CNR1;CSF1;CSF2;CX3CR1;AIF1;F2RL1;FCGR3A;FN1;GATA2;FOXP1;ANXA1;HMGB1;HSPD1;IFNG;IFNGR1;RBPJ;IL4;IL6;CXCL8;CXCR2;IL10;IL13;IL15;IL18;ITGAM;ITGB8;JUN;LGALS9;LYN;MIR142;MIR145;MIR181C;MIF;CD200;ATM;ENPP3;PIK3CD;PIK3CG;PLA2G2A;TREM2;PSEN1;PTPRC;CCL5;CX3CL1;BTK;THBS1;TLR2;TLR3;TLR4;TNF;CCR2;TYROBP;TRPV1;DCSTAMP;TSLP;HYAL2;IL33;CD74	13.7104	7.96e-44
GOBP_POSITIVE_REGULATION_OF_CYTOSOLIC_CALCIUM_ION_CONCENTRATION	CXCL13;CXCR6;CCR9;CCR1;CCR5;CCR7;CCR8;CNR1;ADM;ADRA1A;CX3CR1;CD55;DRD2;AGT;AGTR1;S1PR1;EDN1;EDNRA;EPO;ESR1;F2R;F2RL1;LPAR3;FPR1;FPR2;GATA2;CXCR3;GPER1;HMGB1;IAPP;IL2;CXCR1;CXCR2;ITGAV;KISS1;KNG1;LHCGR;NOS1;OXTR;P2RX3;P2RX5;PDGFRA;PIK3CG;ACKR3;PTGER2;PTGER4;PTGFR;BAX;BCL2;CCL1;TAC1;TACR1;TRPC6;CCR2;TRPV1;CXCR4;CALCA;LPAR2;CD36	15.4292	1.57e-43
GOBP_CELLULAR_COMPONENT_MORPHOGENESIS	DNM1L;UST;PLXNC1;MYL9;SEMA3C;PDLIM5;CFL1;AKAP13;LRRK2;CRABP2;CREB1;CRMP1;CSF1R;CTNNB1;ARX;DLX5;DPYSL2;DRD2;EDN1;EDNRA;MEGF8;EPHA3;EPHB2;EPHB4;ERBB2;ERCC2;FGFR2;PLXND1;NEDD4L;FN1;DICER1;LPAR3;LMOD1;POLDIP2;GATA3;GDNF;ANKRD1;GLI3;GSK3B;TMOD3;HPRT1;APOE;IGF1R;IHH;ITGB1;L1CAM;RHOG;LAMC2;STMN1;LIMK1;SMAD4;MAP2;MDK;NCAM1;NGF;NGFR;NOTCH1;NTF3;NTF4;NTRK2;PAK1;PAX2;NRN1;PDGFRA;PDGFRB;ROBO4;MAP2K1;PSEN1;PT…	6.23631	2.62e-43
GOBP_REGULATION_OF_BINDING	CDKN1A;CARM1;CTHRC1;LRRK2;CRK;CRMP1;PARP1;CSF3;CTNNB1;ACE;EGF;ERCC2;AKT1;DKK1;PLXND1;HEY1;POLDIP2;GATA3;ANGPT1;GSK3B;ANXA2;HDAC2;HMGB1;IFIT1;IFNG;IGF1;APOE;IL10;EIF3E;ITGA2;JUN;STMN1;LIF;LOX;MIR148A;MIR27B;SMAD2;SMAD3;SMAD4;MAP2;MET;MMP9;NFKBIA;NGF;NME1;PLK1;PON1;PPARA;PPARG;MAPK3;MAPK8;PSEN1;B2M;BAX;RB1;ACTB;ROCK1;BDNF;BMP4;SLPI;SRC;TERT;TGFB1;TGFBR1;CLDN5;TWIST1;TXN;VTN;ARHGAP28;HMGA2;NRP1;WNT3…	9.75211	4.94e-43
GOBP_REGULATION_OF_RESPONSE_TO_BIOTIC_STIMULUS	KLRC4-KLRK1;RASGRP1;ADAR;NOD1;CD226;LILRB1;CRK;PARP1;CD55;DAPK1;DRD2;AHR;F2RL1;KLRK1;FPR2;CADM1;IL27;NCR3;PTPN22;GATA6;FOXP1;CD274;HCK;HLA-B;HLA-DRB1;HLA-G;HMGB1;BIRC2;BIRC3;HSPD1;IFIT1;APOE;IL1B;IL4;IL12B;IL12RB1;IL15;IL17A;USP17L2;KIR2DL4;KLRC1;ARG1;LEP;LGALS9;LTF;LYN;SH2D1A;MIR21;MBL2;MIF;MMP12;NFE2L2;PAK1;FOXP3;HERC5;IL23A;TREM2;PPARG;MED1;PRKCA;MAPK3;HTRA1;PVR;IL21;CCL5;CX3CL1;SRC;TLR4;SERPI…	9.94988	5.32e-43
GOBP_ADAPTIVE_IMMUNE_RESPONSE	ADA;KLRC4-KLRK1;LILRB2;CXCL13;CD226;LILRB1;CSK;CTLA4;CX3CR1;CD55;AHR;EPHB2;ERCC1;FCGR3A;FGA;KLRK1;SIRT1;CADM1;ALOX15;IL27;MTOR;GATA3;TNFRSF21;CD274;MSH6;TBX21;ANXA1;HLA-B;HLA-C;HLA-DPB1;HLA-DQB1;HLA-DRB1;HLA-G;HMGB1;HPRT1;HSPD1;ICAM1;CFI;IFNA1;IFNA13;IFNG;IL1B;IL1R1;IL2;IL4;IL6;IL7R;IL9;IL10;IL12B;IL12RB1;IL17A;IL18;KLRC1;ARG1;LTA;LYN;SH2D1A;MIR21;MBL2;MLH1;MSH2;NOTCH1;FOXP3;PDCD1;IL23A;PIK3CD;PI…	6.39325	5.33e-43
GOBP_REGULATION_OF_CELLULAR_RESPONSE_TO_GROWTH_FACTOR_STIMULUS	PDCD6;TOB1;FST;CXCL13;CTNNB1;DCN;AGT;AGTR2;FBN1;FGF1;FGF2;FGF9;DKK1;SIRT1;GATA3;GATA6;GREM1;HDAC1;HDAC2;HIF1A;HOXA13;CCN1;RBPJ;IL1B;IL4;IL12B;ILK;ITGA5;ITGB3;KDR;HES5;LOX;ARNT;MIR10B;MIR17;MIR20A;MIR200C;MIR21;SMAD2;SMAD3;SMAD4;MIR342;NGFR;NOTCH1;PIK3CB;WNT4;PPARA;PPARG;PRKCB;SULF2;HTRA1;MIR503;SEMA6A;SMOC2;SFRP1;SFRP2;BMP4;ADAM17;ZEB1;TGFB1;TGFB1I1;TGFB3;THBS1;TP53;VEGFC;VTN;TET1;AXIN1;NRP1;CREB…	10.3928	5.69e-43
GOBP_RESPONSE_TO_CHEMOKINE	CIB1;CXCL13;CXCR6;CCR9;CCR1;CCR5;CCR7;CCR8;CX3CR1;DUSP1;EDN1;CXCR3;CXCL1;HIF1A;CXCL8;CXCR1;CXCR2;CXCL10;LOX;LYN;CXCL9;PF4;PF4V1;TREM2;ACKR3;CCL1;CCL2;CCL5;CCL11;CCL14;CCL16;CCL17;CCL19;CCL21;CCL22;CCL25;CXCL5;CX3CL1;CXCL12;WNK1;SLIT3;CCR2;CXCR4;SLIT2	31.3429	6.25e-43
GOBP_CELL_ACTIVATION_INVOLVED_IN_IMMUNE_RESPONSE	ADA;RASGRP1;LILRB1;DOCK11;CX3CR1;ERCC1;F2RL1;FCGR3A;IL27;MTOR;GATA2;GATA3;FOXP1;MSH6;TBX21;ANXA1;HLA-DRB1;HMGB1;HSPD1;ICAM1;IFNA1;IFNA13;IFNG;IL2;IL4;IL6;IL10;IL12B;IL12RB1;IL13;IL18;ITGAM;LGALS1;LGALS3;LGALS9;LYN;MIR21;MDK;MLH1;MSH2;MYB;FOXP3;IL23A;ENPP3;PIK3CD;PIK3CG;TREM2;PSEN1;PTGER4;PTPRC;IL21;BCL6;CCL19;STAT3;STAT6;BTK;TGFB1;TLR4;TP53;CCR2;TYROBP;XBP1;IL18R1;IL33;CD19;CD86;CD40LG;CD74	11.3152	1.11e-42
GOBP_POSITIVE_REGULATION_OF_INFLAMMATORY_RESPONSE	CEBPA;LRRK2;CCR7;CNR1;ACE;AGT;AGTR1;ETS1;PDCD4;IFNG;IL1B;IL2;IL6;IL12B;IL15;IL16;IL18;IDO1;ITGA2;LGALS1;LTA;MIR126;MIR142;MIR21;MIR22;MDK;NFKBIA;NINJ1;SERPINE1;IL23A;PIK3CG;PLA2G2A;TREM2;PTGER4;PTGS2;IL21;CCL1;CX3CL1;BTK;TLR2;TLR3;TLR4;TNF;TNFRSF1A;C3;CCR2;ZP3;TSLP;HYAL2;IL33;CLOCK;CD47	19.3671	1.61e-42
GOBP_EMBRYONIC_ORGAN_DEVELOPMENT	ADA;TSHZ1;YAP1;CEBPA;CTHRC1;OSR2;ADM;CSF2;CTNNB1;DLX5;EDN1;EDNRA;MEGF8;EGFR;EPHB2;ERCC1;AKT1;ESRRB;FBN1;FGF9;FGFR2;HEY1;GATA2;GATA3;GDNF;GLI1;GLI3;HIF1A;HOXA11;HOXB4;ID2;CCN1;RBPJ;IHH;CXCL8;IL10;KCNQ1;KDR;LIF;ARNT;SMAD2;SMAD3;KITLG;MMP14;NOTCH1;PAX2;PDGFA;PDGFRA;PLG;POLE;MED1;MAPK1;MAPK3;MAP2K1;PSEN1;RARB;RARRES2;BMP4;BMP7;SNAI1;SOD1;SOX9;SOX15;HNF1B;ZEB1;TCF21;NR2F2;TGFB1;TGFB2;TGFB3;TGFBR1;TNF;…	8.48752	1.93e-42
GOBP_POSITIVE_REGULATION_OF_SECRETION	DNM1L;CFTR;UCN3;CNR1;CPB2;CREB1;CRH;CYP19A1;DRD2;AGT;EDN1;F2RL1;FGA;GATA2;GDNF;GHRH;GHRHR;ANKRD1;ANG;GPER1;ANXA2;HIF1A;HLA-DRB1;IFNG;IGF1;IL1A;IL1B;IL4;AQP1;IL13;INHA;INHBA;ITGAM;KISS1;LEP;SMAD4;MIF;OXTR;TREM2;PPARG;PRL;RETN;PSMD9;SDC1;SDC4;CXCL12;SLC6A4;SPP1;SSTR4;SYT1;TACR1;TGFB1;TGFB2;TGFB3;TLR2;TLR4;TRH;UCN;VEGFC;EZR;VIP;TRPV1;XBP1;ZP3;NR0B2;CASR;IRS2;PTGES	11.0689	3.49e-42
GOBP_REGULATION_OF_MAP_KINASE_ACTIVITY	RASGRP1;AKAP13;LRRK2;CSK;IL34;AGT;DUSP1;EDN1;EGF;EGFR;ERBB2;EZH2;FGF1;FGF2;DKK1;FLT1;NUP62;PTPN22;GBA;GH1;PDCD4;GSTP1;APOE;IL1B;INSR;LYN;KITLG;MIF;MST1R;NTF3;NTRK3;PAK1;PDGFA;PDGFRB;PIK3CB;PIK3CG;PPARG;MAP2K7;PSEN1;PTPRC;CCL19;SFRP1;SFRP2;BMP4;BMP7;SRC;TDGF1;TGFB1;THBS1;TLR4;TNF;UCHL1;VEGFA;AXIN1;HYAL2;ADIPOQ	16.0445	3.79e-42
GOBP_G_PROTEIN_COUPLED_RECEPTOR_SIGNALING_PATHWAY	ADA;CXCR6;CCR9;AKAP13;CHRM3;UCN3;CCR1;CCR5;CCR7;CCR8;LTB4R;CNR1;ADM;CRHR1;CRHR2;ADRA1A;ADRA2B;GPBAR1;CX3CR1;AKR1C2;DEFB4A;AGRP;DRD2;AGT;AGTR1;AGTR2;S1PR1;EDN1;EDNRA;AKT1;ESR1;F2;F2R;F2RL1;OR9Q1;PLCB1;LPAR3;FPR1;FPR2;FSHB;FSHR;GHRH;GHRHR;GNRHR;CXCR3;GPER1;GPR42;CXCL1;ANXA1;HPGD;IAPP;APOE;IL2;CXCL8;CXCR1;CXCR2;CXCL10;INSR;ITGB3;AREG;KCNQ1;KISS1;STMN1;LHB;LHCGR;MIR143;MIR145;MAS1;MET;CXCL9;OPRM1;OXT…	4.70173	4.06e-42
GOBP_MESENCHYMAL_CELL_DIFFERENTIATION	PDCD6;SEMA3C;COL1A1;CTNNB1;DDX5;EDN1;EDNRA;EPHA3;EZH2;FGFR2;FN1;HEY1;MTOR;GATA3;GREM1;GDNF;PDCD4;GSK3B;HDAC2;HGF;HIF1A;FOXA2;IGF1;RBPJ;IL1B;IL6;MIR21;SMAD2;SMAD3;SMAD4;MDK;KITLG;MIR342;NOTCH1;NOTCH4;PAX2;WNT4;MAPK1;MAPK3;PTEN;SEMA6A;BCL2;ROCK1;S100A4;SFRP1;SFRP2;BMP4;BMP7;SNAI2;SNAI1;SOX9;TCF21;TGFB1;TGFB1I1;TGFB2;TGFB3;TGFBR1;TWIST1;HMGA2;NRP1;HAND2;SEMA3E;CDC42	12.6275	4.52e-42
GOBP_CONNECTIVE_TISSUE_DEVELOPMENT	CDK4;PPARGC1A;OSR2;COL1A1;MAPK14;CSF1;CCN2;CTNNB1;EDN1;EGR1;FGF2;FGF9;SIRT1;GREM1;GLI3;HIF1A;HOXA11;CCN1;IHH;ITGB3;ITGB8;HES5;LEP;LOX;MIR21;SMAD3;MDK;MMP13;NOTCH1;PDGFA;PDGFRB;PIK3CA;PPARG;MAPK3;SULF2;ACTA2;RARB;RB1;RXFP1;SFRP2;BMP4;BMP7;BMPR1B;SNAI2;SNAI1;SOX9;STC1;ZEB1;TGFB1;TGFBI;TGFBR1;THRA;TIMP1;WNT7A;WT1;XBP1;HMGA2;CASR;RUNX1;RUNX3;NCOA1;HYAL2;SERPINH1;HAND2;CD44	11.9258	4.56e-42
GOBP_FOREBRAIN_DEVELOPMENT	CDK6;LRRK2;CREB1;CRK;CSF1R;CTNNB1;ARX;DLX5;DRD2;EGFR;EMX2;EPHB2;EZH2;FGF2;FGFR2;DKK1;PLCB1;CHD5;GATA2;GHRH;GHRHR;FOXP1;GLI1;GLI3;GSK3B;H2AX;HDAC1;HIF1A;HPRT1;HSD3B1;HSD3B2;ID2;IGF1R;RBPJ;AQP1;INHBA;ITGAM;KRAS;HES5;LAMB1;MAS1;MDK;NOTCH1;NTRK2;OXTR;WNT4;AXL;PSEN1;B2M;PTEN;BAX;RARB;CXCL12;SLC2A1;BMP4;SLIT3;SOX2;SRC;SRD5A1;SRD5A2;SSTR1;SSTR4;ZEB1;NR2F2;TYROBP;WNT7A;XRCC1;CXCR4;NDNF;CASP3;NRP1;WNT3A;S…	9.37154	5.17e-42
GOBP_CELLULAR_RESPONSE_TO_REACTIVE_OXYGEN_SPECIES	CHUK;LRRK2;SIRPA;CYP1B1;EDN1;EGFR;AKT1;EZH2;FOXO3;SIRT1;FOS;FOXP1;ANXA1;HDAC2;HGF;APEX1;IL6;AQP1;IL10;JUN;ARG1;MIRLET7B;MIR17;MIR21;MIR34A;MET;MMP2;MMP9;MPO;NFE2L2;NOS3;PAX2;PCNA;PDGFRA;AXL;MAPK1;MAPK3;MAPK8;RELA;BMP7;SOD1;SOD2;SRC;STAT6;BTK;TXN;CAT;AKR1C3;BECN1;CD36;CDK1	19.5538	6.7e-42
GOBP_REGULATION_OF_PEPTIDASE_ACTIVITY	PDCD6;BCL2L11;NOD1;CLDN4;CLDN3;CCN2;DAPK1;AGT;AHSG;AKT1;F2R;F3;FBLN1;FN1;SIRT1;GPER1;ANXA2;HDAC1;HGF;HMGB1;NR4A1;BIRC2;BIRC3;BIRC5;HSPD1;CCN1;FAS;FASLG;IL9;AQP1;KNG1;LGALS9;LPA;LTF;LYN;MIRLET7B;MIR17;MIR195;MIR205;MIR21;MIR27B;MIR29C;SMAD3;MMP9;MYC;NGF;NGFR;SERPINE1;SERPINB2;PAX2;SERPINF1;SERPINA1;PPARG;PTGS2;BAX;RAF1;RARRES1;ROCK1;SFRP2;SLC1A1;SLPI;SOX2;SRC;STAT3;THBS1;TIMP1;TIMP2;TIMP3;TIMP4;SE…	8.30644	7.57e-42
GOBP_IMMUNE_RESPONSE_REGULATING_SIGNALING_PATHWAY	ADA;KLRC4-KLRK1;LILRB2;NOD1;KHDRBS1;CD226;LILRB1;PHB2;FCRL3;CCR7;CD200R1;CSK;CTLA4;ESR1;F2RL1;FCGR3A;KLRK1;FPR1;FPR2;NCR3;PTPN22;GATA3;FOXP1;TNFRSF21;HCK;HLA-DPB1;HLA-DQB1;HLA-DRB1;HLA-G;HMGB1;BIRC2;BIRC3;HSPD1;TICAM2;USP17L2;KIR2DL1;KLRC1;LGALS3;LGALS9;LIMK1;LTF;LYN;SH2D1A;MIR17;MIR34A;MBL2;NFKBIA;NINJ1;PAK1;FOXP3;PIK3CA;PIK3CD;TREM2;PRKCB;MAPK1;MAPK8;MAP2K7;PSEN1;PTPRC;BAX;BCL2;RELA;WNK1;SRC;BR…	7.86156	9.87e-42
GOBP_REGULATION_OF_LYMPHOCYTE_DIFFERENTIATION	ADA;RASGRP1;LILRB2;FCRL3;CTLA4;ERBB2;FANCD2;FOXO3;IL27;GATA3;GLI3;TBX21;ANXA1;HLA-DRB1;HLA-G;HMGB1;ID2;IFNG;IHH;IL2;IL2RA;IL4;IL7;IL7R;IL10;IL12B;IL12RB1;IL15;IL18;INHA;INHBA;LGALS9;MIR21;MDK;MMP14;MYB;FOXP3;IL23A;AXL;PTPRC;ACTB;BCL6;CCL19;SFRP1;BMP4;SMARCC1;SOD1;BRAF;ZEB1;BTK;CCR2;XBP1;ARID1A;CARD11;RUNX1;RUNX3;CD86;CD74	14.5548	1.09e-41
GOBP_GRANULOCYTE_CHEMOTAXIS	DNM1L;CXCL13;CCR7;CSF1;CSF1R;IL34;DPP4;EDN1;DAPK2;MSTN;CXCL1;ANXA1;IL1B;IL4;CXCL8;CXCR1;CXCR2;CXCL10;LGALS3;MDK;CXCL9;IL23A;PF4;PF4V1;PIK3CD;PIK3CG;MAPK1;MAPK3;RARRES2;CCL1;CCL2;CCL5;CCL11;CCL14;CCL16;CCL17;CCL19;CCL21;CCL22;CCL25;CXCL5;CX3CL1;BSG;TGFB2;THBS1;VAV1;SLIT2;CD74	22.4404	1.1e-41
GOBP_B_CELL_ACTIVATION	ADA;RASGRP1;CDKN1A;PHB2;FCRL3;DOCK11;CTLA4;AHR;EPHB2;ERCC1;EZH2;TNFRSF21;MSH6;TBX21;HSPD1;ID2;IFNA1;IFNA13;RBPJ;IL2;IL4;IL6;IL7;IL7R;IL9;IL10;IL11;IL13;INHA;INHBA;ITGB1;LGALS1;LYN;MIF;MLH1;MMP14;MSH2;ATM;FOXP3;PIK3CD;PRKCB;PRLR;PTEN;PTPRC;BAX;IL21;BCL2;BCL6;SFRP1;DCLRE1C;STAT6;ADAM17;TCF3;BTK;TGFB1;TLR4;TP53;TYROBP;VCAM1;XBP1;CASP3;CARD11;IRS2;WNT3A;CD19;MS4A1;CD86;CD40LG;CD74;CD79A;HDAC9	10.0472	1.36e-41
GOBP_REGULATION_OF_CELL_PROJECTION_ORGANIZATION	UST;PLXNC1;YAP1;CARM1;SEMA3C;CIB1;PDLIM5;CFL1;LRRK2;CCR7;CNR1;CRABP2;CRK;DOCK11;CRMP1;AGT;MEGF8;EPHA3;EPHB2;EPO;AKT1;EZH2;F2RL1;FKBP4;DKK1;PLXND1;NEDD4L;FN1;LPAR3;MTOR;GATA3;MSTN;INTU;MYLIP;GSK3B;HDAC2;HGF;ICAM1;APOE;IGF1R;ITGA2;USP17L2;L1CAM;RHOG;LIMK1;LYN;MIR200C;MIR21;MIR210;MIR214;TACSTD2;MAP2;MDK;NFE2L2;NGF;NTRK2;NTRK3;PAK1;SERPINF1;PIK3CA;TREM2;MAP2K1;PSEN1;B2M;PTEN;SEMA6A;PTN;PTPRD;BDNF;CC…	6.4809	1.77e-41
GOBP_MAMMARY_GLAND_DEVELOPMENT	BCL2L11;MTCO2P12;PHB2;CREB1;CSF1;CSF1R;CYP19A1;EGF;AKT1;ESR1;FGF2;FGFR2;GATA3;GHRHR;GLI3;NR3C1;HIF1A;ID2;AR;ITGA2;AREG;ARG1;NFKB1;NME1;NOTCH4;OXTR;PGR;WNT4;MED1;MAPK1;PRL;PRLR;BAX;RXFP1;CCND1;CCL11;BMP4;SOX9;SRC;BRCA2;STAT6;TDGF1;TGFB3;USF2;VDR;VEGFA;XBP1;IRS2;WNT3A	20.8643	2.29e-41
GOBP_POSITIVE_REGULATION_OF_PHOSPHATIDYLINOSITOL_3_KINASE_SIGNALING	CSF3;DCN;AGT;EGF;F2;F2R;F2RL1;FGF2;FLT1;FN1;SIRT1;FSHR;GH1;ANGPT1;GPER1;HGF;IGF1;IGF1R;IL18;INSR;KDR;LEP;MIR126;MIR21;NTRK2;NTRK3;PDGFA;PDGFRA;PDGFRB;TREM2;MYDGF;CCL5;SOX9;SRC;TEK;TGFB2;TNF;CAT;BECN1;SEMA3E	37.6183	2.48e-41
GOBP_FEMALE_SEX_DIFFERENTIATION	FST;ZFP42;CYP19A1;ESR1;FOXO3;SIRT1;FSHB;FSHR;NR5A1;AMH;AMHR2;GNRH1;ANG;INHA;INHBA;INSR;KDR;LEP;LHCGR;SMAD4;KITLG;MMP2;MMP14;ATM;NOS3;PDGFRA;PGR;WNT4;AXL;RETN;BAX;BCL2;BCL2L1;SFRP1;BMPR1B;SLIT3;SOD1;SRC;SRD5A1;SRD5A2;BRCA2;NR2F2;VEGFA;WT1;ZP3;CASP3;SLIT2	23.0955	2.74e-41
GOBP_NEGATIVE_REGULATION_OF_PHOSPHORYLATION	CDKN1A;CDKN1B;CDKN2A;ADAR;CEBPA;CIB1;LRRK2;SIRPA;CSK;DRD2;AGT;DUSP1;DUSP6;EPHB2;AKT1;FBLN1;DKK1;SIRT1;NUP62;PTPN22;GBA;GREM1;MSTN;PDCD4;ANGPT1;GSTP1;HGF;FOXA2;IFNG;APOE;IGFBP3;IL1B;IL2;INHA;INHBA;JUN;LYN;MIR132;MIR20A;MIR27B;MIR34A;MAS1;NTF3;NTRK3;ENPP1;PIK3CB;PLK1;ERRFI1;PPARA;PPARG;PPP2R1A;PSEN1;PTEN;PTPRC;BAX;RB1;ROCK1;MIR483;SFRP1;SFRP2;BMP4;BMP7;STAT3;NR2F2;TGFB1;THY1;UCHL1;CASP3;IRS2;HYAL2;…	9.26805	3.31e-41
GOBP_TRANSMEMBRANE_RECEPTOR_PROTEIN_SERINE_THREONINE_KINASE_SIGNALING_PATHWAY	TOB1;FST;PARP1;MAPK14;DDX5;DLX3;DLX5;MEGF8;EGR1;FBN1;FGF9;DKK1;SIRT1;FOS;FSHB;GATA6;GREM1;MSTN;AMH;AMHR2;PDCD4;HDAC1;HDAC2;HOXA13;HPGD;CCN1;RBPJ;ILK;INHA;INHBA;ITGB1;ITGB8;JUN;KDR;HES5;LOX;MIR17;MIR183;MIR20A;MIR21;MIR30A;SMAD2;SMAD3;SMAD4;MIR342;NOTCH1;PPARA;PPARG;MAPK3;HTRA1;SFRP1;SFRP2;BMP4;BMP7;BMPR1B;SRC;STAT3;ADAM17;ZEB1;TDGF1;TGFB1;TGFB1I1;TGFB2;TGFB3;LEFTY2;TGFBR1;THBS1;CLDN5;TP53;VIM;TET…	9.07543	3.41e-41
GOBP_REGULATION_OF_PHOSPHATIDYLINOSITOL_3_KINASE_SIGNALING	RASGRP1;CSF3;DCN;AGT;EGF;EGFR;F2;F2R;F2RL1;FGF2;FLT1;FN1;SIRT1;FSHR;GH1;ANGPT1;GPER1;HGF;IGF1;IGF1R;IL18;INSR;KDR;LEP;MIR126;MIR20A;MIR21;NTRK2;NTRK3;PDGFA;PDGFRA;PDGFRB;TREM2;MYDGF;PTEN;CCL5;SOX9;SRC;TEK;TGFB2;TNF;TWIST1;CAT;BECN1;SEMA3E	25.7554	3.69e-41
GOBP_REGULATION_OF_LYMPHOCYTE_MEDIATED_IMMUNITY	KLRC4-KLRK1;RASGRP1;CD226;LILRB1;CRK;CD55;AHR;KLRK1;CADM1;NCR3;GATA3;TBX21;HLA-B;HLA-DRB1;HLA-G;HMGB1;HSPD1;IL1B;IL1R1;IL2;IL4;IL6;IL7R;IL10;IL12B;IL12RB1;IL18;KIR2DL4;KLRC1;ARG1;LEP;LGALS9;LTA;SH2D1A;MLH1;MSH2;FOXP3;IL23A;TREM2;B2M;PTPRC;PVR;IL21;BCL6;STAT6;BTK;TGFB1;TNF;TNFRSF1B;C3;CCR2;VAV1;ZP3;IL18R1	16.4346	3.78e-41
GOBP_CELLULAR_RESPONSE_TO_EXTERNAL_STIMULUS	CDKN1A;POSTN;UCN3;LRRK2;COL1A1;COMT;AGT;AIF1;ERCC6;ALB;FGF2;FOXO1;FOXO3;SIRT1;FOS;MTOR;GBA;ANKRD1;FOXA2;IGF1R;FAS;IL1B;AQP1;AQP2;IL13;IL15;ITGA2;ITGB3;LEP;LYN;NFE2L2;NFKB1;WNT4;KRT20;PPARA;MED1;AXL;MAPK1;MAPK3;MAPK8;PTGER4;PTGS2;PTPRC;BCL2;RXRA;SFRP1;SFRP2;SLC2A1;SNAI2;SOX9;SRD5A1;KLF10;TLR3;TLR4;TNFRSF1A;TP53;USF2;VCAM1;VDR;XBP1;MAP1LC3B;CASR;AKR1C3;NCOA1;BECN1;BCL10;UCN2;IL33;CD68	10.3213	4.07e-41
GOBP_REGULATION_OF_EXTRINSIC_APOPTOTIC_SIGNALING_PATHWAY	YAP1;CSF2;AGT;AGTR2;AKT1;FGA;GDNF;GPER1;PDIA3;GSK3B;GSTP1;HGF;ICAM1;IGF1;IL1A;IL1B;IL4;IL7;INHBA;AR;ITGAV;LGALS3;NOS3;SERPINE1;PF4;PPP2R1A;PTEN;PTPRC;RAF1;BCL2;RELA;BCL2L1;CX3CL1;SFRP1;SFRP2;BMP4;BMPR1B;SNAI2;SRC;BRCA1;TERT;TGFBR1;THBS1;TIMP3;TNF;RNF34;PEA15;HYAL2;TNFSF10;NRP1;BCL10	18.6122	4.48e-41
GOBP_REGULATION_OF_RESPONSE_TO_WOUNDING	HPSE;CPB2;CLDN4;CLDN3;CRK;HBEGF;EDN1;EPHB2;F2;F2R;F2RL1;F3;FGA;FGF2;MTOR;ANXA1;ANXA2;FOXA2;APOE;IGF1R;IL10;ITGB1;KNG1;MIR200B;MIR21;MIR34A;SMAD3;MDK;NFE2L2;NOS3;SERPINE1;SERPINB2;PDGFA;PDGFRA;PLAU;PLG;WNT4;MAP2K1;PTEN;MIR451A;PTN;ACTA2;SMOC2;SPP1;BRAF;THBS1;SERPING1;TNF;VTN;XBP1;CXCR4;CLDN1;CD36	16.9301	6.01e-41
GOBP_REGULATION_OF_PRODUCTION_OF_MOLECULAR_MEDIATOR_OF_IMMUNE_RESPONSE	NOD1;CD226;LILRB1;PHB2;FCRL3;CD55;EPHB2;F2RL1;SIRT1;PTPN22;GATA3;ANGPT1;TBX21;HK1;HLA-G;APOA2;IL1B;IL1R1;IL2;IL4;IL6;IL10;IL13;IL17A;IL18;KIR2DL4;ARG1;MIF;MLH1;MSH2;FOXP3;AXL;B2M;PTPRC;IL21;BCL6;STAT6;BTK;TGFB1;TGFB2;TGFB3;TLR3;TLR4;TNF;TNFRSF1B;TWIST1;CCR2;XBP1;IL18R1;BCL10;IL33;CD86;CD36;CD40LG;CD74	15.6186	6.04e-41
GOBP_MUSCLE_TISSUE_DEVELOPMENT	YAP1;SEMA3C;PDLIM5;PPARGC1A;AKAP13;CREB1;MAPK14;ADRA1A;CTNNB1;DDX5;AGT;S1PR1;EDN1;EDNRA;EGR1;FGF2;FGF9;FGFR2;DKK1;HEY1;FOS;MTOR;GATA6;GREM1;MSTN;GJA1;ANKRD1;FOXP1;GLI1;NR4A1;ID2;IGF1;RBPJ;IHH;ITGB1;KRAS;LOX;MIR143;MIR145;MIR195;MIR200B;MIR204;SMAD3;SMAD4;NOTCH1;PDGFRA;PDGFRB;DLL4;PPARA;MED1;RBFOX1;PTEN;RARB;RB1;BCL2;RGS4;BMP4;BMP7;SOX9;SOX15;TCF21;NR2F2;TGFB1;TGFB2;TGFBR1;TWIST1;VEGFA;WT1;FZD7;RU…	8.62603	6.78e-41
GOBP_CELL_CYCLE_PROCESS	BCL2L11;KIF20A;CDK4;CDK6;CDKN1A;CDKN1B;CDKN2A;CDKN3;KHDRBS1;CTCF;DCTN6;CFL1;PHB2;CKS1B;MAPK14;CCN2;CTNNB1;CYP1A1;DRD2;DUSP1;EDN1;EDNRA;EGF;EGFR;EIF4EBP1;AIF1;ERCC1;ERCC2;AKT1;ERCC6;ESRRB;EZH2;FANCD2;FEN1;FOXM1;PLCB1;SIRT1;NUP62;POLDIP2;GATA6;GJA1;GLI1;GPER1;MSH6;TMOD3;DNMT3L;ANXA1;H2AX;HLA-G;HOXA13;APEX1;BIRC5;ID2;IGF1;IGF1R;IL1A;IL1B;INHBA;INSR;ITGB1;USP17L2;RHOC;STMN1;LIF;MIR195;MIR214;MIR29C;M…	4.61742	8.18e-41
GOBP_CELL_PART_MORPHOGENESIS	DNM1L;UST;PLXNC1;SEMA3C;PDLIM5;CFL1;LRRK2;CRABP2;CREB1;CRMP1;CSF1R;CTNNB1;ARX;DLX5;DPYSL2;DRD2;EDN1;EDNRA;MEGF8;EPHA3;EPHB2;EPHB4;ERBB2;FGFR2;PLXND1;NEDD4L;FN1;DICER1;LPAR3;POLDIP2;GATA3;GDNF;GLI3;GSK3B;HPRT1;APOE;IGF1R;ITGB1;L1CAM;RHOG;LAMC2;STMN1;LIMK1;SMAD4;MAP2;MDK;NCAM1;NGF;NGFR;NOTCH1;NTF3;NTF4;NTRK2;PAK1;PAX2;NRN1;ROBO4;MAP2K1;PSEN1;PTEN;SEMA6A;PTN;PTPRD;BAX;NECTIN1;BCL2;BCL2L1;ACTB;ROCK1;…	6.50407	8.49e-41
GOBP_OSTEOBLAST_DIFFERENTIATION	TOB1;CDK6;ADAR;YAP1;CEBPA;CTHRC1;COL1A1;MAPK14;VCAN;CTNNB1;DDX5;DLX5;AKT1;FGF2;FGF9;FGFR2;GREM1;GLI1;GLI3;GSK3B;HGF;TNC;IGF1;IGFBP3;CCN1;IHH;IL6;ILK;AREG;LOX;LTF;MIR17;MIR20A;MIR200C;MIR21;MIR210;SMAD3;SMAD4;NOTCH1;WNT4;PPARG;RORB;SFRP1;SFRP2;BMP4;BMP7;BMPR1B;SNAI2;SNAI1;SOX2;SOX9;SPP1;TNF;TWIST1;VEGFC;CAT;WNT3A;CREB3L1;ACVR2B;HAND2;RASSF2	12.6016	9.18e-41
GOBP_RESPONSE_TO_RADIATION	CDKN1A;YAP1;PARP1;MAPK14;DNMT3A;AGRP;DRD2;EGFR;EGR1;NR2F6;ERCC1;ERCC2;AKT1;ERCC6;FANCD2;FEN1;SIRT1;FOS;GATA3;ANGPT2;MSH6;ANXA1;H2AX;HIF1A;ID2;IL1A;AQP1;IL12B;CXCL10;ITGB1;ITGB3;KRAS;MIR21;MDM2;MECP2;MME;MMP1;MMP2;MMP3;MMP9;MSH2;MYC;ATM;OGG1;OPRM1;FOXP3;PCNA;POLD1;MAPK8;MAP2K7;PTGS2;PTPRC;BAX;CCND1;BCL2;RELA;BCL2L1;SAG;CCL11;CXCL12;SFRP1;SFRP2;DCLRE1C;SNAI2;SOD2;BRCA1;BRAF;BRCA2;TIMP1;TNF;TP53;TXN…	8.21797	1.37e-40
GOBP_STRESS_ACTIVATED_PROTEIN_KINASE_SIGNALING_CASCADE	RASGRP1;NOD1;LRRK2;CCR7;CRK;SIRPA;MAPK14;CCN2;AGT;DUSP1;EGFR;ERCC6;F2RL1;FOXM1;FOXO1;PLCB1;PTPN22;GREM1;PDCD4;GSTP1;HGF;HMGB1;IGF1R;IGFBP6;FAS;IL1A;IL1B;LEP;LGALS9;LYN;MIR20A;SMAD3;MYC;NFKB1;TREM2;MAPK1;MAPK3;MAPK8;MAP2K1;MAP2K7;PTGER4;CCL19;CCL21;SFRP1;SFRP2;BMP4;TGFB2;TLR3;TLR4;TNF;VEGFA;EZR;WNT7A;ZFP36;AXIN1;FZD7;CASR;HDAC3;HAND2;NCOR1;RASSF2	12.4652	1.54e-40
GOBP_REGULATION_OF_BLOOD_VESSEL_ENDOTHELIAL_CELL_MIGRATION	CIB1;MAPK14;AGTR2;AKT1;ETS1;FGF2;SIRT1;GATA2;ANGPT1;ANGPT2;ANXA1;HIF1A;HMGB1;APOE;KDR;MIR10B;MIR126;MIR132;MIR143;MIR20A;MIR200A;MIR200B;MIR200C;MIR204;MIR210;MIR22;MIR27B;MIR29C;MIR30A;MIR31;MECP2;MIR135B;MIR342;NFE2L2;NOS3;NOTCH1;DLL4;PPARG;PRKCA;PTGS2;MIR503;MIR483;ADAM17;TGFB1;THBS1;TNF;VEGFA;VEGFC;NRP1;HDAC9	18.7734	1.89e-40
GOBP_REGULATION_OF_MYELOID_LEUKOCYTE_DIFFERENTIATION	CDK6;LILRB1;CCR1;CREB1;CSF1;IL34;CTNNB1;FBN1;FOS;MTOR;FSHB;GATA2;FOXP1;HLA-DRB1;IAPP;ID2;IFNG;IL4;IL12B;IL17A;INHA;INHBA;LIF;LTF;LYN;MIR145;KITLG;MYC;TNFRSF11B;IL23A;PF4;TREM2;PRKCA;RB1;SFRP1;TGFB1;KLF10;TLR3;TLR4;TNF;TYROBP;DCSTAMP;RUNX1;ADIPOQ;CD74;RASSF2	22.8815	2.59e-40
GOBP_POSITIVE_REGULATION_OF_NEUROGENESIS	PLXNC1;CRABP2;IL34;CTNNB1;CX3CR1;ACE;DRD2;MEGF8;EPHB2;FGF2;PLXND1;FN1;DICER1;LPAR3;MTOR;GLI3;GPER1;HDAC1;HDAC2;HIF1A;ID2;IFNG;IL1B;IL6;ITGB1;KRAS;L1CAM;LIF;LIMK1;LTA;LYN;MIR142;MDK;MECP2;MME;NGF;NOTCH1;NTRK2;OPRM1;SERPINF1;MAP2K1;PTN;PTPRD;BDNF;CX3CL1;CXCL12;BRAF;TGFB1;TSPO;TLR2;TNF;TNFRSF1B;VEGFA;VEGFC;CXCR4;NRP1;WNT3A;IL33;SLIT2	13.0925	2.94e-40
GOBP_DEVELOPMENT_OF_PRIMARY_FEMALE_SEXUAL_CHARACTERISTICS	FST;ZFP42;CYP19A1;ESR1;FOXO3;SIRT1;FSHB;FSHR;NR5A1;AMH;AMHR2;GNRH1;ANG;INHA;INHBA;INSR;KDR;LEP;LHCGR;SMAD4;KITLG;MMP2;MMP14;ATM;NOS3;PDGFRA;PGR;WNT4;RETN;BAX;BCL2;BCL2L1;SFRP1;BMPR1B;SLIT3;SOD1;SRC;BRCA2;NR2F2;VEGFA;WT1;ZP3;CASP3;SLIT2	25.5465	3.58e-40
GOBP_RESPONSE_TO_VIRUS	ABCC9;CDK6;ADAR;CFL1;LILRB1;PHB2;CHUK;MAPK14;CYP1A1;ENO1;F2RL1;IL27;PTPN22;GATA3;TBX21;HIF1A;BIRC2;BIRC3;IFI27;IFIT1;IFNA1;IFNA13;IFNG;IFNGR1;IL1B;IL4;IL6;IL12B;IL12RB1;IL15;CXCL10;ISG20;ITGB8;JAK1;USP17L2;STMN1;LGALS9;MIR21;MIR30C1;SMAD3;MBL2;CXCL9;MMP12;MST1R;NFKB1;FOXP3;HERC5;IL23A;ATAD3A;HTRA1;PTPRC;BAX;ACTA2;IL21;BCL2;RELA;BCL2L1;CCL5;CCL11;CCL19;CCL22;CXCL12;SKP2;SRC;TLR2;TLR3;TNF;TPT1;TYK2…	8.63883	6.18e-40
GOBP_SPROUTING_ANGIOGENESIS	CIB1;AGTR1;EPHB4;AKT1;FGF1;FGF2;GATA2;GREM1;ANGPT1;ANXA1;NR4A1;IL10;IL12B;ITGA5;ITGB1;JAK1;KDR;MIRLET7B;MIR10B;MIR126;MIR132;MIR17;MIR20A;MIR200C;MIR21;MIR22;MIR27B;MIR29C;MIR30C1;MIR31;MIR34A;MIR342;NGFR;NOTCH1;MIR375;PGF;PIK3CB;DLL4;PTGS2;MIR503;SEMA6A;MIR483;S100A1;BMP4;TDGF1;TEK;THBS1;VEGFA;VEGFC;NRP1;CREB3L1;SLIT2;SEMA3E;HDAC9	15.3208	6.87e-40
GOBP_CELLULAR_HOMEOSTASIS	ABCB6;CFTR;PPARGC1A;CLCN3;LRRK2;CCR1;CCR5;CCR7;CPB2;MUC17;ACE;DRD2;AGT;EDN1;EDNRA;F2;F2R;FGF2;FOXO1;FOXO3;SIRT1;MSTN;GHRHR;GPER1;CCDC22;GSTM2;SLC40A1;HIF1A;HK1;HLA-DRB1;FOXA2;APEX1;ICAM1;IFNG;APOE;IGF1R;IL1A;FASLG;IL6;AQP1;IL13;CXCL10;ITGB3;KCNQ1;LHCGR;LOX;LYN;MIR210;SMAD4;CXCL9;MYC;NFE2L2;NGFR;NOS1;NOS2;NOS3;P2RY6;PAX2;ENPP1;SERPINF1;PIK3CA;PIK3CB;PLG;TREM2;RMDN3;PPT1;PRKCB;MAPK1;MAPK3;PSEN1;PTP…	5.87691	8.25e-40
GOBP_REGULATION_OF_ADAPTIVE_IMMUNE_RESPONSE	ADA;CD226;LILRB1;CD55;AHR;EPHB2;SIRT1;ALOX15;IL27;GATA3;CD274;TBX21;ANXA1;HLA-B;HLA-DRB1;HLA-G;HMGB1;HSPD1;IL1B;IL1R1;IL2;IL4;IL6;IL7R;IL10;IL12B;IL12RB1;IL18;KLRC1;ARG1;LTA;MIR21;MLH1;MSH2;FOXP3;IL23A;TREM2;B2M;PTPRC;PVR;BCL6;CCL19;STAT6;BTK;TGFB1;TNF;TNFRSF1B;C3;CCR2;TYK2;ZP3;SKAP1;IL18R1;IL33;CD48	14.6334	9.66e-40
GOBP_EPITHELIAL_CELL_APOPTOTIC_PROCESS	CDKN1B;PAK4;ADAR;YAP1;DNMT3A;EDNRA;ESR1;FGA;FOXO3;GATA2;GATA3;PDCD4;ANGPT1;GPER1;HLA-G;ICAM1;IGF1R;FASLG;IL4;IL6;IL10;IL11;IL13;KDR;MIR126;MIR132;MDK;NFE2L2;MIR375;SERPINE1;PIK3CG;PPARA;BAX;RB1;BCL2;BCL2L1;CCL2;BRAF;TEK;TERT;THBS1;TNF;ZFP36;NDNF;CASP3;AKR1C3;HAND2;CD40LG	19.7533	1.05e-39
GOBP_REGULATION_OF_LEUKOCYTE_APOPTOTIC_PROCESS	ADA;BCL2L11;CDKN2A;LILRB1;CCR7;KIFAP3;SIRT1;FOXP1;CD274;ANXA1;HIF1A;IL2;IL7R;CXCR2;IL10;IDO1;LGALS3;LGALS9;LYN;KITLG;MIF;PDCD1;PIK3CB;PIK3CD;AXL;PTEN;BAX;BCL2;BCL2L1;BCL6;CCL5;CCL19;CCL21;CXCL12;BMP4;ADAM17;BTK;TP53;IRS2;BCL10;CD74	29.6634	1.89e-39
GOBP_NEGATIVE_REGULATION_OF_CELL_ACTIVATION	LILRB2;LILRB1;CNR1;CTLA4;ERBB2;F2;PTPN22;TNFRSF21;GLI3;GPER1;CD274;TBX21;ANXA1;HLA-DRB1;HLA-G;HMGB1;ID2;APOE;IHH;IL2;IL2RA;IL4;IL10;IDO1;INHA;INHBA;ARG1;LGALS3;LGALS9;LYN;MIR181C;MIR21;MDK;CD200;ATM;NOS3;FOXP3;PDGFA;PDGFRA;ENPP3;TREM2;AXL;PTEN;PTPRC;BCL6;CX3CL1;SDC4;SFRP1;BMP4;BTK;CCR2;TYROBP;CASP3;RUNX1;RUNX3;CD86;CD74	13.244	3.46e-39
GOBP_POSITIVE_REGULATION_OF_PROTEIN_SERINE_THREONINE_KINASE_ACTIVITY	RASGRP1;CDKN1B;CIB1;AKAP13;CKS1B;LRRK2;CSF1R;CSK;IL34;EDN1;EGF;EGFR;ERBB2;AKT1;EZH2;FGF1;FGF2;DKK1;FLT1;SIRT1;GH1;IFNG;IL1B;INSR;LTF;KITLG;MIF;MNAT1;MST1R;NTF3;NTRK3;PAK1;PDGFA;PDGFRB;PIK3CG;MAP2K1;MAP2K7;PSEN1;PSMD10;PTPRC;CCND1;CCL19;BMPR1B;SRC;ADAM17;TDGF1;TGFB1;THBS1;TLR4;TNF;VEGFA;HMGA2;CAB39L;AXIN1;CCNB1;ADIPOQ;CD40LG;CDC6	12.7832	3.83e-39
GOBP_REGULATION_OF_SMALL_MOLECULE_METABOLIC_PROCESS	DNM1L;MTCO2P12;PPARGC1A;CNR1;ADM;PARP1;TTC39B;EGR1;ENO1;AKT1;FGF1;FOXO1;FMO2;SIRT1;MTOR;GPER1;NR3C1;ANXA1;HIF1A;FOXA2;IFNG;IGF1;APOE;IGFBP3;IL1B;IL4;INSR;LEP;LEPR;LHCGR;ARNT;MIR132;MIR204;MIR21;MIR210;MIR30C1;MIR33A;MAS1;MST1;NFKB1;NOS1;NOS2;NOS3;P2RY6;TREM2;WNT4;PPARA;PPARG;PSEN1;PTGS2;SNAI2;SNAI1;SOD1;SOX9;SRC;BRCA1;STAR;STAT3;TFF3;TSPO;TNF;TP53;TWIST1;AKR1C3;IRS2;ADIPOQ;NCOR1;CD74	9.63377	5.88e-39
GOBP_POSITIVE_REGULATION_OF_ENDOTHELIAL_CELL_PROLIFERATION	PDCD6;AGTR1;EGF;AKT1;F3;FGF2;SIRT1;GATA2;ANG;HIF1A;HMGB1;NR4A1;IL10;ITGB3;JUN;KDR;ARG1;ARNT;MIRLET7B;MIR10B;MIR126;MIR132;MIR21;MIR27B;MDK;MIR135B;NRAS;PGF;PIK3CD;PRKCA;MYDGF;MIR503;CCL11;CXCL12;BMP4;STAT3;ADAM17;TEK;TGFBR1;VEGFA;VEGFC;VIP;PROK1;NRP1	23.3884	6.03e-39
GOBP_RESPONSE_TO_NUTRIENT	POSTN;CNR1;COL1A1;CYP1A1;CYP1B1;CYP26A1;DNMT3A;EPO;ERCC1;MTOR;FOXA2;IGF1R;IL1A;IL15;CXCL10;ITGA2;ARG1;LEP;LTA;OGG1;TNFRSF11B;UGT1A1;PPARG;MED1;PTGS2;CCND1;RXRA;SFRP1;SFRP2;SLC6A4;BMP7;SNAI2;SOD2;SPP1;SST;STC1;TSPO;USF2;VCAM1;VDR;XBP1;CASR;CAT;STC2;AKR1C3;NCOA1;BECN1;ADIPOQ;LIPG	17.8506	7.27e-39
GOBP_CATION_TRANSPORT	ABCB6;DNM1L;ABCC9;CDKN1B;LILRB2;MTCO2P12;LILRB1;SCN11A;PHB2;FCRL3;CLCN3;CCR1;CCR5;CCR7;CNR1;CRH;CRHR1;CSF2;ADRA1A;CCN2;CNIH3;CTNNB1;ADRA2B;CYB5A;DAPK1;ACE;DPP6;DRD2;AGT;EDN1;EDNRA;EGF;EPHB2;EPO;AKT1;F2;F2R;FGF2;FKBP4;NEDD4L;SLC7A8;GDNF;GPER1;REM1;GSTM2;SLC40A1;ANXA2;IFNG;FASLG;AQP1;IL13;IL16;CXCL10;ITGAV;ITGB1;ITGB3;KCNQ1;KCNQ2;ARG1;LGALS3;LHCGR;LTF;LYN;MIR200C;MIR21;MIR210;MIR34A;MAOB;CXCL9;MMP9…	4.57953	8.3e-39
GOBP_OVULATION_CYCLE	CYP1B1;EGR1;ESR1;FOXO3;SIRT1;FSHB;FSHR;NR5A1;MSTN;AMH;ANXA1;IGF1R;INHBA;KISS1;LEP;LHCGR;MDK;MMP2;NOS3;OPRM1;OXTR;PCNA;PDGFRA;SERPINF1;PGR;AXL;RETN;PTN;BMPR1B;SLIT3;SRC;TGFB2;TGFB3;TIMP4;ZP3;CASP3;SLIT2	38.5613	1.29e-38
GOBP_CELL_JUNCTION_ORGANIZATION	LILRB2;PDLIM5;CFL1;LRRK2;CLDN4;CLDN3;CLDN7;MAPK14;CSF1R;CSK;CTNNB1;GPBAR1;CX3CR1;ACE;DRD2;AGT;EPHA3;EPHB2;ERBB2;F2R;F2RL1;DKK1;PLXND1;FN1;POLDIP2;GREM1;GDNF;GJA1;GJB2;TNC;APOE;IGF1R;IL1B;IL1RAP;IL10;IL17A;INSR;ITGA2;ITGA5;ITGAM;ITGB3;KDR;RHOC;L1CAM;MIR142;SMAD3;MECP2;MMP14;NTRK2;NTRK3;CLDN11;OXTR;TREM2;WNT4;SYBU;PRKCA;PSEN1;PTEN;PTPRD;NECTIN1;BCL2;ACTB;ROCK1;BDNF;CX3CL1;SDC4;SFRP1;SLC1A1;SNAI2;SN…	6.06239	1.37e-38
GOBP_NEGATIVE_REGULATION_OF_PROTEIN_MODIFICATION_PROCESS	CDKN1A;CDKN1B;CDKN2A;ADAR;CEBPA;CIB1;LRRK2;SIRPA;CTNNB1;DNMT1;DNMT3B;DRD2;AGT;DUSP1;DUSP6;EPHB2;AKT1;FBLN1;DKK1;SIRT1;NUP62;PTPN22;GBA;GREM1;PDCD4;ANGPT1;GSK3B;GSTP1;HDAC2;HGF;IFNG;APOE;IGFBP3;IL1B;IL2;JUN;USP17L2;LGALS3;LIMK1;LYN;MIR132;MIR20A;MIR27B;MIR34A;MAS1;NTF3;NTRK3;FOXP3;ENPP1;PIK3CB;PLK1;ERRFI1;PPARG;PPP2R1A;PSEN1;PTEN;PTPRC;BAX;RB1;RELA;ROCK1;MIR483;SFRP1;SFRP2;BMP4;BMP7;BRCA1;NR2F2;TG…	7.25165	1.4e-38
GOBP_POSITIVE_REGULATION_OF_LEUKOCYTE_CHEMOTAXIS	DNM1L;CXCL13;CCR1;CCR7;CSF1;CSF1R;IL34;CX3CR1;EDN1;AIF1;F2RL1;FPR2;DAPK2;MSTN;HMGB1;IL4;IL6;CXCL8;CXCR2;CXCL10;LGALS9;MDK;SERPINE1;IL23A;PGF;MAPK1;MAPK3;PTN;RARRES2;CCL1;CCL5;CCL19;CCL21;CXCL12;WNK1;ADAM17;THBS1;CCR2;VEGFA;VEGFC;CD74	27.5631	1.61e-38
GOBP_REGULATION_OF_CATABOLIC_PROCESS	MIR543;BCL2L11;DNM1L;TOB1;CDK4;CDKN1B;NOD1;CEBPA;DEPP1;LRRK2;CNR1;MAPK14;ADRA1A;DAPK1;DCN;EGF;EGFR;ELAVL1;AKT1;FOXO1;FOXO3;SIRT1;DAPK2;SH3BP4;MTOR;RNF19A;POLDIP2;PTPN22;GBA;GDNF;CCDC22;MYLIP;GSK3B;ANXA2;HGF;HIF1A;HMGB1;HP;HPGD;APEX1;APOA2;IFNG;IGF1;APOE;IL1B;IL4;IL6;IL10;INSR;ITGB1;KDR;LEP;LEPR;ARNT;MIRLET7B;MIR21;MIR210;SMAD3;SMAD4;MDM2;MET;MLH1;ATM;NFE2L2;NOS2;YBX1;PIK3CA;PIK3CB;PIK3CG;PLK1;TRE…	5.01571	2.16e-38
GOBP_POSITIVE_REGULATION_OF_NERVOUS_SYSTEM_DEVELOPMENT	PLXNC1;CRABP2;IL34;CTNNB1;CX3CR1;ACE;DRD2;MEGF8;EPHB2;FGF2;PLXND1;FN1;DICER1;LPAR3;MTOR;GLI3;GPER1;HDAC1;HDAC2;HIF1A;ID2;IFNG;IL1B;IL1RAP;IL6;ITGB1;KRAS;L1CAM;LIF;LIMK1;LTA;LYN;MIR142;MDK;MECP2;MME;NGF;NOTCH1;NTRK2;OPRM1;OXTR;SERPINF1;MAP2K1;PTN;PTPRD;BDNF;CX3CL1;CXCL12;BRAF;TGFB1;TSPO;TLR2;TNF;TNFRSF1B;VEGFA;VEGFC;WNT7A;CXCR4;NRP1;WNT3A;IL33;SLIT2	10.9217	2.24e-38
GOBP_CELLULAR_RESPONSE_TO_STEROID_HORMONE_STIMULUS	BCL2L11;YAP1;CARM1;PHB2;PARP1;CYP1B1;ACE;DDX5;EDN1;ESR1;ESR2;ESRRB;FKBP4;FOXO3;SIRT1;MSTN;GHRHR;GJB2;FOXP1;GPER1;NR3C1;ANXA1;HDAC1;IGF1R;AQP1;AR;ARG1;NR3C2;PAK1;SERPINF1;PGR;ERRFI1;PPARA;UGT1A1;MED1;TRERF1;VPS11;RXRA;SFRP1;SKP2;BMP4;BMP7;SRC;SRD5A1;BRCA1;SSTR4;STC1;KLF9;TCF21;NR2C1;ZFP36;ARID1A;AKR1C3;CLOCK;NCOR1	13.5872	2.32e-38
GOBP_CELL_MATRIX_ADHESION	BCL2L11;CDK6;CDKN2A;CIB1;HPSE;CCR7;CSF1;CCN2;CTNNB1;EPHA3;FGA;FN1;POLDIP2;GREM1;GSK3B;ILK;ITGA2;ITGA5;ITGAM;ITGAV;ITGB1;ITGB3;ITGB8;KDR;L1CAM;MIR29C;SMAD3;MMP12;MMP14;MUC4;SERPINE1;PIK3CB;PLAU;WNT4;PTEN;RASA1;BCL2;BCL6;ROCK1;CCL21;CCL25;CX3CL1;SDC4;SFRP1;SRC;TEK;THBS1;THY1;UTRN;VCAM1;VEGFA;VTN;SKAP1;ACTN1;NRP1;CD36;CD44;SEMA3E	12.2856	2.33e-38
GOBP_CELLULAR_RESPONSE_TO_ABIOTIC_STIMULUS	CDKN1A;YAP1;COL1A1;PARP1;MAPK14;AGT;EGR1;EPO;ERCC1;FGF2;AKR1B1;SIRT1;MTOR;GATA3;ANKRD1;H2AX;IGF1R;FAS;IL1B;AQP1;AQP2;IL13;AQP5;ITGA2;ITGB3;MIR21;MDM2;MME;MMP1;MMP2;MMP3;MMP9;MYC;ATM;NFKB1;PCNA;PIK3CA;ERRFI1;POLD1;MAPK3;MAPK8;PTEN;PTGER4;PTGS2;BAX;BCL2L1;SAG;SFRP1;SFRP2;SLC2A1;SLC2A4;SNAI2;SOX9;BRCA1;BRCA2;TSPO;TIMP1;TLR3;TLR4;TNFRSF1A;TP53;TRPV1;CASP3;HYAL2;BCL10;IL33;CLOCK	9.55332	3.14e-38
GOBP_HORMONE_TRANSPORT	CFTR;UCN3;CNR1;ADM;CREB1;CRH;CRHR1;CYP19A1;DRD2;AGT;AGTR1;EDN1;FGA;FOXO1;SLC7A8;GATA3;GHRH;GHRHR;GJA1;GNRHR;GPER1;ANXA1;HIF1A;HLA-DRB1;FOXA2;IFNG;IL1B;IL1RN;IL6;AQP1;IL11;INHA;INHBA;KCNQ1;KISS1;LEP;LIF;LYN;SMAD2;SMAD4;NOS2;PPARG;RETN;PSMD9;RAF1;REN;CCL5;SFRP1;SPP1;TACR1;HNF1B;BTK;TSPO;TNF;TRH;UCN;VIP;PAX8;NR0B2;CASR;IRS2;ACVR2B;ADIPOQ;CLOCK	10.2517	3.72e-38
GOBP_RECEPTOR_SIGNALING_PATHWAY_VIA_STAT	CSF1R;CSF2;CYP1B1;AGT;EGF;EPHB2;EPO;F2;F2R;GH1;HDAC2;IFNA1;IFNA13;IFNG;IGF1;IL2;IL4;IL6;IL7R;IL9;IL10;IL12B;IL13;IL15;IL18;JAK1;HES5;LEP;LIF;LYN;MST1;NOTCH1;IL23A;PPARG;PPP2R1A;PRL;PRLR;PTPRC;PTPRD;IL21;CCL2;CCL5;STAT3;STAT4;STAT6;TGFB1;TNF;TNFRSF1A;CCR2;TYK2;VEGFA;TSLP	14.9507	4.64e-38
GOBP_ENDOCRINE_SYSTEM_DEVELOPMENT	CDK6;CREB1;CRH;CRHR1;CYP1B1;DRD2;EDN1;EDNRA;AKT1;FGF2;NR5A1;GATA2;GATA3;GATA6;GHRH;GHRHR;GLI1;NR3C1;GSK3B;ANXA1;FOXA2;RBPJ;IL6;INSR;SMAD2;SMAD3;SMAD4;MDK;PDGFRA;WNT4;MAPK1;MAPK3;MAP2K1;RAF1;BMP4;SOX2;SOX9;SRD5A1;BRAF;TGFBR1;TSPO;THRA;WT1;PAX8;CLOCK;CDH1	19.5346	5.79e-38
GOBP_INTERLEUKIN_6_PRODUCTION	LILRB2;NOD1;CD200R1;SIRPA;CSK;AIF1;F2R;F2RL1;PTPN22;GBA;IL37;HGF;HLA-B;HMGB1;HSPD1;IFNG;IL1A;IL1B;IL1RAP;IL6;IL10;IL16;IL17A;LEP;LGALS9;MIR132;MIR195;MIR204;CD200;NOS2;FOXP3;IL17D;TREM2;CX3CL1;STAT3;BTK;TLR2;TLR3;TLR4;TNF;TWIST1;TYROBP;UCN;XBP1;TSLP;HYAL2;BCL10;IL33;CD36;CD47;CD74	15.4726	5.94e-38
GOBP_PLACENTA_DEVELOPMENT	ADA;CDKN1B;CEBPA;ADM;PARP1;MAPK14;CSF2;DLX3;EGFR;EPOR;AKT1;ESRRB;FGFR2;HEY1;GATA2;GJB2;ANG;DNMT3L;HIF1A;BIRC2;HSD17B2;CCN1;RBPJ;IL10;ITGB8;LEP;LIF;ARNT;MME;PLG;PPARG;MED1;MAPK1;MAP2K1;HTRA1;PTGS2;PTN;BMP7;SNAI1;SOD1;SOX15;SPP1;STC1;BSG;NR2F2;VDR;STC2;NCOA1	17.6407	6.36e-38
GOBP_AXON_DEVELOPMENT	UST;PLXNC1;SEMA3C;CNR1;CRABP2;CREB1;CRMP1;CSF1R;ARX;DLX5;DPYSL2;DRD2;EDN1;EDNRA;MEGF8;EPHA3;EPHB2;EPHB4;ERBB2;FGFR2;PLXND1;FN1;LPAR3;GATA3;GDNF;TNFRSF21;GLI3;GSK3B;TNC;APOE;IGF1R;ITGB1;JUN;L1CAM;RHOG;LAMC2;STMN1;LIMK1;SMAD4;MAP2;MMP2;NCAM1;NGF;NGFR;NOTCH1;NTRK2;PAK1;PAX2;ROBO4;MAP2K1;PSEN1;PTEN;SEMA6A;PTN;NECTIN1;BCL2;ACTB;BDNF;S100A6;S100B;CXCL12;BMP7;BMPR1B;SLIT3;SPP1;BRAF;BSG;TSPO;THY1;UCHL1;V…	7.43232	6.62e-38
GOBP_REGULATION_OF_EPITHELIAL_CELL_APOPTOTIC_PROCESS	CDKN1B;PAK4;ADAR;YAP1;ESR1;FGA;FOXO3;GATA2;GATA3;PDCD4;ANGPT1;GPER1;HLA-G;ICAM1;IGF1R;FASLG;IL4;IL6;IL10;IL11;IL13;KDR;MIR126;MIR132;MDK;NFE2L2;MIR375;SERPINE1;PPARA;BAX;RB1;BCL2;CCL2;BRAF;TEK;TERT;THBS1;TNF;ZFP36;NDNF;AKR1C3;HAND2;CD40LG	22.8365	8.94e-38
GOBP_REACTIVE_OXYGEN_SPECIES_METABOLIC_PROCESS	CDKN1A;MTCO2P12;CLCN3;LRRK2;CRP;MAPK14;CCN2;CYP1A1;CYP1A2;CYP1B1;AKR1C1;AGT;AGTR1;EDN1;F2;F2RL1;FOXM1;FOXO1;FOXO3;FPR2;GPX3;GSTP1;HIF1A;HP;BIRC2;CCN1;ITGAM;LEP;MIR21;MIR27B;MAOB;MMP3;MPO;NFE2L2;NOS2;NOS3;PAX2;PDGFRB;PPARA;BCL2;SLC1A1;BMP7;SOD1;SOD2;BRCA1;TGFB1;THBS1;TSPO;TLR4;TNF;TP53;TYROBP;VAV1;CAT;AKR1C3;BECN1;CD36	12.2681	1.05e-37
GOBP_REGULATION_OF_ANATOMICAL_STRUCTURE_SIZE	SEMA3C;UTS2;CHRM3;CLCN3;LRRK2;CCR7;ADM;CRABP2;CREB1;CRP;CSF3;ADRA1A;ADRA2B;ACE;DPYSL2;AGT;AGTR1;AGTR2;EDN1;EDNRA;MEGF8;F2R;F2RL1;FGA;FN1;LPAR3;ALOX15;MTOR;LMOD1;GPER1;GSK3B;TMOD3;HCK;APOE;IL7R;AQP1;KNG1;L1CAM;LEP;LIMK1;MIR21;MIR214;MAP2;MMP2;NGF;NOS1;NOS3;OXTR;PAX2;PIK3CA;PTEN;PTGS2;SEMA6A;ACTA2;RASA1;ROCK1;BDNF;CCL11;CCL21;CXCL12;SLC6A4;SOD1;SOD2;SPP1;TACR1;HNF1B;TNF;UCN;VAV1;VEGFA;EZR;WNT7A;CAL…	7.22841	1.29e-37
GOBP_GLIAL_CELL_DIFFERENTIATION	CDK6;NDRG1;MMP24;CSK;IL34;CTNNB1;ERBB2;ERCC2;AKT1;F2;FGF2;DICER1;MTOR;GBA;TNFRSF21;GLI3;HDAC1;HDAC2;ID2;IFNG;IFNGR1;IL1B;IL6;ILK;KRAS;HES5;LIF;LYN;MIR142;MIR181C;MDK;NOTCH1;NTRK2;NTRK3;PAX2;TREM2;MAPK1;MAPK3;MAP2K1;PSEN1;PTEN;PTN;SOD1;SOX2;SOX9;STAT3;TGFB1;TLR2;TLR4;TNF;TNFRSF1B;VIM;VTN;CXCR4;IL33;CDK1	12.4619	2.19e-37
GOBP_LYMPHOCYTE_ACTIVATION_INVOLVED_IN_IMMUNE_RESPONSE	ADA;LILRB1;DOCK11;ERCC1;F2RL1;FCGR3A;IL27;MTOR;GATA3;FOXP1;MSH6;TBX21;ANXA1;HLA-DRB1;HMGB1;HSPD1;ICAM1;IFNA1;IFNA13;IFNG;IL2;IL4;IL6;IL10;IL12B;IL12RB1;IL18;LGALS1;LGALS3;LGALS9;MIR21;MDK;MLH1;MSH2;MYB;FOXP3;IL23A;PSEN1;PTGER4;PTPRC;IL21;BCL6;CCL19;STAT3;STAT6;TGFB1;TLR4;TP53;XBP1;IL18R1;CD19;CD86;CD40LG;CD74	13.3284	2.38e-37
GOBP_IN_UTERO_EMBRYONIC_DEVELOPMENT	ADA;BCL2L11;YAP1;CEBPA;ADM;CSF2;CTNNB1;EDN1;EDNRA;EGFR;ERCC2;AKT1;ESRRB;FGFR2;HEY1;GABPA;GATA2;GATA3;GATA6;FOXD3;GLI3;ANGPT1;DNMT3L;HIF1A;HSD17B2;IGF1;CCN1;RBPJ;IHH;IL10;AR;ITGB1;LIF;ARNT;SMAD2;SMAD3;SMAD4;MSH2;NOS3;NOTCH1;YBX1;PDGFRA;PLG;POU5F1;MED1;MAPK1;MAP2K1;SALL4;BCL2L1;BMP7;SNAI1;SOX15;BRCA2;HNF1B;NR2F2;TGFB3;TGFBR1;TP53;C5;TWIST1;VEGFA;ZP3;TET1;AXIN1;NCOA1;CCNB1;WNT3A;ACVR1B;COPS2;HAND2;G…	8.4269	2.46e-37
GOBP_ORGANIC_HYDROXY_COMPOUND_METABOLIC_PROCESS	CDH3;CEBPA;CETP;CFTR;CYP2R1;SGPP2;COMT;CYP1A1;CYP1A2;CYP1B1;CYP3A4;TTC39B;CYP11A1;CYP19A1;CYP26A1;AKR1C1;AKR1C2;DIO2;DRD2;EDNRA;FGF1;FGF2;AKR1B1;PLCB1;SIRT1;ALOX15;NR5A2;GATA3;GBA;GC;GPER1;HIF1A;HPRT1;HSD11B2;HSD17B1;HSD17B3;APOA2;IFNG;IGF1;APOE;IL4;IMPA2;ITGAM;LBR;LEP;LEPR;LHCGR;LIPC;LIPE;CYP4F3;MIR210;MIR30C1;MIR33A;MAOA;MAOB;MAS1;MECP2;NFKB1;P2RY6;HSD17B7;WNT4;PON1;MED1;PTEN;BCL2;SLC1A1;SNAI2;…	6.81317	2.8e-37
GOBP_LIPID_BIOSYNTHETIC_PROCESS	CDK4;CFTR;CYP2R1;SGPP2;ADM;CRABP2;CREB1;CRH;CYP1A1;CYP1A2;CYP3A4;CYP11A1;CYP17A1;CYP19A1;EDN1;EGR1;AKT1;FGF1;FGF2;AKR1B1;SIRT1;ALOX15;MTOR;FSHB;NR5A1;GBA;HPGDS;ANG;GPER1;GPX4;NR3C1;GSTM1;GSTM2;GSTP1;ANXA1;ACACA;HSD3B1;HSD3B2;HSD17B1;HSD17B3;HSD17B2;APOA2;HSD17B13;IFNG;APOE;IGF1R;IGFBP7;CCN1;IL1A;IL1B;IMPA2;LBR;LEP;LHB;LHCGR;LIPC;MIR132;MIR204;MIR30C1;MIR33A;MIF;ATM;NFKB1;HSD17B7;PDGFA;PIK3CA;PIK3…	5.81171	2.82e-37
GOBP_REGULATION_OF_CELL_CYCLE_PROCESS	KIF20A;CDK4;CDKN1A;CDKN1B;CDKN2A;CTCF;PHB2;MAPK14;CCN2;CTNNB1;CYP1A1;DRD2;DUSP1;EDN1;EGF;EGFR;AIF1;ERCC2;AKT1;ERCC6;EZH2;FANCD2;FEN1;PLCB1;SIRT1;NUP62;POLDIP2;GLI1;GPER1;TMOD3;ANXA1;H2AX;HLA-G;HOXA13;APEX1;BIRC5;ID2;IGF1;IGF1R;IL1A;IL1B;INHBA;INSR;USP17L2;LIF;MIR195;MIR214;MIR29C;MIR30C2;MDM2;MECP2;MNAT1;MSH2;MUC1;MYC;ATM;PDGFRB;PLK1;WNT4;MED1;PPP2R1A;PTEN;MIR451A;MIR503;RB1;CCND1;BCL2;BCL2L1;ACT…	5.8025	3.16e-37
GOBP_CELL_KILLING	KLRC4-KLRK1;RASGRP1;CD226;LILRB1;CRK;CX3CR1;CD55;DEFB4A;F2;F2RL1;FCGR3A;KLRK1;CADM1;NCR3;HLA-B;HLA-DRB1;HLA-G;HPRT1;ICAM1;IFNG;IL4;IL7R;IL10;IL11;IL12B;IL12RB1;IL13;IL18;ITGAM;KIR2DL4;KIR3DL1;KLRC1;ARG1;LEP;LGALS9;LTF;SH2D1A;NOS2;IL23A;MAPK8;B2M;PTPRC;PVR;IL21;BCL2L1;TGFB2;C3;TYROBP;C9;VAV1;ULBP3;ULBP2	14.1975	3.75e-37
GOBP_REGENERATION	CDKN1A;CDKN1B;YAP1;ADM;CPB2;ACE;EZH2;MSTN;GLI1;GLI3;ANGPT2;ANXA1;HGF;APOA2;TNC;IGF1;IGF1R;IGFBP1;IHH;IL6;IL10;JUN;MDK;MMP2;NINJ1;NOTCH1;PCNA;PGF;PLG;UGT1A1;MED1;AXL;MAP2K1;PTEN;PTN;CCND1;BCL2;CXCL12;SOX2;SOX15;SPP1;BRAF;TSPO;THY1;TNF;VTN;WNT7A;FZD7;NR0B2;RUNX1;CLDN1;CDK1	14.096	5.01e-37
GOBP_MITOTIC_CELL_CYCLE	SRA1;KIF20A;CDK4;CDK6;CDKN1A;CDKN1B;CDKN2A;CDKN3;CIB1;ZNRD2;KHDRBS1;DCTN6;CFL1;PHB2;CKS1B;CTNNB1;CYP1A1;DNMT3A;DUSP1;EDN1;EDNRA;EGF;EGFR;EIF4EBP1;AIF1;ERCC2;AKT1;ESRRB;EZH2;FANCD2;FOXM1;PLCB1;SIRT1;NUP62;POLDIP2;GJA1;TMOD3;ANXA1;HGF;HOXA13;APEX1;BIRC5;ID2;IGF1;IL1A;IL1B;IL10;INHBA;INSR;ITGB1;RHOC;STMN1;MIR195;MIR21;MIR214;MIR29C;MIR30C2;MDM2;MECP2;MNAT1;MSH2;MUC1;MYB;MYC;ATM;PCNA;RMDN1;PDGFRB;PLK…	5.04311	5.05e-37
GOBP_RESPIRATORY_SYSTEM_DEVELOPMENT	ADA;YAP1;CEBPA;AGR2;CREB1;CRH;CCN2;CTNNB1;CYP1A2;ACE;DLX5;FGF1;FGF2;FGF9;FGFR2;GATA6;GLI1;GLI3;RBPJ;IL13;KDR;ARG1;KRAS;LIF;LOX;SMAD2;MME;MMP12;MMP14;NOS3;NOTCH1;PDGFA;PDGFRA;PDGFRB;PGR;ERRFI1;MAPK1;MAPK3;MAP2K1;RXFP1;BMP4;SOX9;TCF21;TGFB3;THRA;TNF;VEGFA;WT1;YWHAZ;BAG6;AIMP2;CRISPLD2;ACVR2B;CDC42	13.073	5.38e-37
GOBP_POSITIVE_REGULATION_OF_LEUKOCYTE_MEDIATED_IMMUNITY	KLRC4-KLRK1;RASGRP1;CD226;CD55;F2RL1;KLRK1;CADM1;NCR3;GATA3;TBX21;HLA-B;HLA-DRB1;HLA-G;HSPD1;IL1B;IL1R1;IL2;IL4;IL6;IL12B;IL12RB1;IL18;ITGAM;KIR2DL4;ARG1;LTA;SH2D1A;MLH1;MSH2;NOS2;FOXP3;IL23A;TREM2;B2M;PTPRC;PVR;IL21;STAT6;BTK;TGFB1;TNF;C3;TYROBP;VAV1;ZP3;IL18R1	18.2992	5.6e-37
GOBP_REGULATION_OF_CELL_KILLING	KLRC4-KLRK1;RASGRP1;CD226;LILRB1;CRK;CX3CR1;CD55;F2RL1;KLRK1;CADM1;NCR3;HLA-B;HLA-DRB1;HLA-G;ICAM1;IFNG;IL4;IL7R;IL10;IL11;IL12B;IL12RB1;IL13;ITGAM;KIR2DL4;KLRC1;ARG1;LEP;LGALS9;SH2D1A;NOS2;IL23A;MAPK8;B2M;PTPRC;PVR;IL21;BCL2L1;TGFB2;TYROBP;VAV1	24.1272	8.25e-37
GOBP_REGULATION_OF_LIPID_LOCALIZATION	CETP;CRH;CRHR1;CRP;TTC39B;CYP19A1;AGT;AGTR1;EDN1;EGF;AKT1;SIRT1;ANXA2;APOA2;APOE;IL1A;IL1B;FASLG;IL6;ITGAV;ITGB3;LEP;MIR10B;MIR148A;MIR17;MIR27B;MIR30C1;MIR33A;MIR34A;MIF;NFKB1;NFKBIA;TREM2;PON1;PPARA;PPARG;RETN;REN;RXRA;SPP1;SSTR4;MIR33B;THBS1;TSPO;TNF;C3;IRS2;ADIPOQ;LIPG;CD36;PTGES	14.432	9.29e-37
GOBP_REGULATION_OF_TISSUE_REMODELING	CSF1R;CSK;AGT;S1PR1;FSHB;GREM1;IAPP;IL2;IL6;IL12B;IL15;IL18;ITGB3;LEP;LEPR;MIR143;MIR17;MIR195;MIR20A;MIR214;MIR27B;MIR34A;MDK;TNFRSF11B;IL23A;PPARG;PRKCA;IL21;ROCK1;SFRP1;SPP1;SRC;TGFB1;TP53;CALCA;DCSTAMP;RUNX1;HAND2	29.7072	1.05e-36
GOBP_POSITIVE_REGULATION_OF_PROTEIN_KINASE_B_SIGNALING	HPSE;CCR7;CSF3;CX3CR1;AKR1C2;HBEGF;EGF;EGFR;F3;FGF2;GATA3;ANGPT1;IAPP;IGF1;IGF1R;IL18;INSR;ITGB1;LEP;MIR126;MIR132;MIR143;MIR21;MET;MST1R;PDGFA;PIK3CA;PIK3CB;PIK3CD;PIK3CG;AXL;MYDGF;CCL19;CCL21;CX3CL1;SRC;TEK;TGFB1;TGFBR1;THBS1;TNF;TXN;AKR1C3	21.0546	1.18e-36
GOBP_NEGATIVE_REGULATION_OF_EPITHELIAL_CELL_PROLIFERATION	CDK6;CDKN1B;PHB2;CPB2;DRD2;FGFR2;FLT1;GATA3;INTU;APOE;IL12B;AR;MIR126;MIR132;MIR181C;MIR21;MIR22;MIR29C;MIR34A;MIR342;NGFR;NOTCH1;SERPINF1;DLL4;PPARG;MED1;PRL;B2M;PTEN;MIR503;RB1;MIR483;CCL2;SFRP1;SFRP2;BMP4;SNAI2;SOX2;SOX9;BRCA2;KLF9;ZEB1;NR2F2;TGFB1;TGFB2;TGFBR1;THBS1;TNF;VDR;RUNX3	14.9164	1.24e-36
GOBP_POSITIVE_REGULATION_OF_CELLULAR_COMPONENT_BIOGENESIS	BCL2L11;CDKN1B;CXCL13;CCR7;CLDN3;DOCK11;CSF2;CSF3;CCN2;DNMT1;AGT;EPHB2;ERCC1;ESR1;F2RL1;NUP62;ALOX15;MTOR;LMOD1;POLDIP2;MSTN;GSK3B;HCK;IFNG;IL1RAP;IL17A;KDR;RHOC;LGALS3;LIMK1;SMAD3;MECP2;MET;MMP1;MMP3;ATM;NTRK2;OXTR;PAK1;PIK3CA;WNT4;PRKCA;PTPRD;BAX;ROCK1;BDNF;CCL11;CCL19;CCL21;CX3CL1;SDC1;SDC4;SFRP1;BMP7;FSCN1;SOX9;SRC;BRAF;TACR1;TEK;TERF1;TGFB1;TGFB3;TGFBR1;THY1;TLR4;CLDN5;TNF;TP53;VEGFA;WNT7A;S…	7.15298	1.84e-36
GOBP_DNA_METABOLIC_PROCESS	CDKN1A;CARM1;CIB1;CTCF;PPARGC1A;BRD8;PARP1;CCN2;CTNNB1;CYP1A1;CYP1B1;DNMT1;DNMT3A;DNMT3B;EGF;EGFR;TET3;ERCC1;ERCC2;AKT1;ERCC6;EZH2;FANCD2;FEN1;FGF2;FOXM1;DICER1;SIRT1;FOS;POLDIP2;GATA3;GREM1;ANKRD1;GLI1;MSH6;GTF2H1;DNMT3L;TBX21;H2AX;HGF;HMGB1;HMGA1;APEX1;HSPD1;IGF1R;IL2;IL4;IL6;IL7R;IL10;ISG20;LOX;MIR29C;MAS1;MECP2;MLH1;MNAT1;MSH2;MYC;ATM;NME1;NT5E;OGG1;FOXP3;PCNA;PDGFA;PDGFRB;PIK3CA;POLD1;POLE;P…	4.74341	2.13e-36
GOBP_REGULATION_OF_WOUND_HEALING	HPSE;CPB2;CLDN4;CLDN3;CRK;HBEGF;EDN1;EPHB2;F2;F2R;F2RL1;F3;FGA;FGF2;MTOR;ANXA1;ANXA2;FOXA2;APOE;ITGB1;KNG1;MIR200B;MIR34A;SMAD3;NFE2L2;NOS3;SERPINE1;SERPINB2;PDGFA;PDGFRA;PLAU;PLG;WNT4;PTEN;MIR451A;ACTA2;SMOC2;THBS1;SERPING1;TNF;VTN;XBP1;CXCR4;CLDN1;CD36	18.4696	2.37e-36
GOBP_REGULATION_OF_MONONUCLEAR_CELL_MIGRATION	KLRC4-KLRK1;CXCL13;CCR1;CCR7;CD200R1;CRK;CSF1;CSF1R;IL34;CX3CR1;DUSP1;AIF1;AKT1;KLRK1;PLCB1;FPR2;GREM1;MSTN;HMGB1;IL4;CXCL10;ITGB3;LGALS3;LGALS9;LYN;MDK;CD200;SERPINE1;MAPK1;MAPK3;RARRES2;CCL1;CCL2;CCL5;CCL21;CXCL12;WNK1;ADAM17;THBS1;TNF;CCR2;SLIT2;CD47	20.5209	2.69e-36
GOBP_ORGAN_GROWTH	BCL2L11;YAP1;PDLIM5;AKAP13;MAPK14;ADRA1A;CYP19A1;ARX;AGT;DUSP6;S1PR1;EDN1;AKT1;ESR1;FGF2;FGF9;FGFR2;GATA6;FOXP1;GLI1;IGF1;RBPJ;IL7;AR;LEP;LEPR;MIR195;MIR200B;MIR204;SMAD2;MMP13;NOTCH1;PDGFRB;PPARA;BNC2;PRLR;PTEN;RARB;BCL2;RGS4;SLC6A4;SOD1;SOX9;STC1;TGFB2;TGFBR1;WT1;RUNX1;ACVR2B;CDK1	14.5721	3.07e-36
GOBP_RESPONSE_TO_HYDROGEN_PEROXIDE	TXNIP;LRRK2;COL1A1;CRK;SIRPA;CYP1B1;EDN1;EZH2;FOXO3;SIRT1;FOXP1;ANXA1;HDAC2;HGF;HP;APEX1;IL6;AQP1;IL10;AREG;ARG1;MIRLET7B;MIR17;MIR21;MIR34A;MET;MMP2;NFE2L2;PAX2;PCNA;PDGFRB;AXL;BCL2;RELA;SDC1;SOD1;SOD2;SRC;STAT6;TXN;CASP3;CAT;BECN1;CDK1	19.3039	3.19e-36
GOBP_CELLULAR_RESPONSE_TO_OXYGEN_LEVELS	CDKN1B;NDRG1;PHB2;UCN3;DNMT3A;EDN1;EGR1;ENO1;AKT1;FOXO1;FOXO3;SIRT1;FOS;MTOR;GATA6;HIF1A;RBPJ;FAS;AQP1;MALAT1;MIR126;MIR145;MIR17;MIR21;MIR210;MIR214;MIR34A;MDM2;MYC;NFE2L2;NOTCH1;PIK3CB;TREM2;PPARG;PTEN;PTGS2;BCL2;SFRP1;SLC2A4;BMP7;SRC;STC1;TERT;TP53;TWIST1;VEGFA;NDNF;CASR;STC2	14.9592	5.49e-36
GOBP_CALCIUM_ION_TRANSPORT	DNM1L;LILRB2;LILRB1;FCRL3;CCR1;CCR5;CCR7;CRHR1;ADRA1A;CCN2;CTNNB1;ACE;DRD2;AGT;EDN1;EDNRA;EGF;EPO;F2;F2R;FGF2;GPER1;REM1;GSTM2;ANXA2;FASLG;IL13;IL16;CXCL10;ITGAV;ITGB3;LGALS3;LHCGR;LYN;MIR200C;MIR21;MIR34A;CXCL9;NOS1;NOS3;OPRM1;P2RX3;P2RX5;P2RY6;PDGFRB;PIK3CG;PRKCB;PSEN1;PTGS2;PTPRC;BAX;BCL2;RGS4;CCL2;CCL5;CCL19;CCL21;CX3CL1;CXCL12;STC1;TSPO;THY1;TPT1;TRPC6;UCN;VDR;TRPV1;CXCR4;CASR;STC2;WNT3A;CD1…	7.65628	6.02e-36
GOBP_CELL_MORPHOGENESIS_INVOLVED_IN_NEURON_DIFFERENTIATION	UST;PLXNC1;SEMA3C;PDLIM5;CFL1;LRRK2;CRABP2;CREB1;CRMP1;CSF1R;ARX;DLX5;DPYSL2;DRD2;EDN1;EDNRA;MEGF8;EPHA3;EPHB2;EPHB4;ERBB2;FGFR2;PLXND1;NEDD4L;FN1;LPAR3;GATA3;GDNF;GLI3;GSK3B;HPRT1;APOE;IGF1R;ITGB1;L1CAM;RHOG;LAMC2;STMN1;LIMK1;SMAD4;MAP2;NCAM1;NGF;NGFR;NOTCH1;NTRK2;PAK1;PAX2;ROBO4;MAP2K1;PSEN1;PTEN;SEMA6A;PTN;PTPRD;NECTIN1;RB1;BCL2;ACTB;BDNF;S100A6;S100B;CXCL12;GORASP1;BMP7;BMPR1B;SLIT3;SOD1;SPP1…	6.58417	6.32e-36
GOBP_REGULATION_OF_DNA_BINDING_TRANSCRIPTION_FACTOR_ACTIVITY	CDKN2A;NOD1;CIB1;PPARGC1A;PHB2;CHUK;CSF3;CTH;CTNNB1;CX3CR1;CYP1B1;AGT;EDN1;AKT1;ESR1;ESR2;EZH2;FANCD2;SIRT1;GREM1;AMH;GLI1;GLI3;CCDC22;HCK;HDAC2;FOXA2;ID2;IL1B;IL1RAP;IL6;IL10;IL18;AR;LGALS9;LTF;MIR21;MIR30C2;SMAD3;CD200;NFKBIA;FOXP3;ENPP1;PPARG;PRKCB;MAPK3;MAPK8;PSMD10;PTEN;RB1;RELA;CX3CL1;BMP7;STAT3;TCF3;BTK;TFDP1;TLR2;TLR3;TLR4;TNF;TWIST1;VEGFA;NLRC5;NR0B2;CARD11;CAT;IL18R1;BCL10;WNT3A;HAND2;C…	7.50051	6.83e-36
GOBP_RESPONSE_TO_MECHANICAL_STIMULUS	TXNIP;COL1A1;MAPK14;CSF1;CTNNB1;DRD2;AGT;EDN1;FGF2;FOS;ANKRD1;ANGPT2;IGF1R;IHH;FAS;IL1B;AQP1;IL13;CXCL10;ITGA2;ITGB3;JUN;KCNQ1;MDK;MMP2;MMP14;MPO;NFKB1;NFKBIA;P2RX3;PIK3CA;MAPK3;MAPK8;RETN;PTGER4;PTGS2;PTN;RAF1;RELA;CXCL12;SLC2A1;SOX9;SRC;TACR1;THBS1;TLR3;TLR4;TNF;TNFRSF1A;UCN;CXCR4;BCL10;IL33	12.7361	7e-36
GOBP_HORMONE_METABOLIC_PROCESS	ADM;CRABP2;CYP1A1;CYP1A2;CYP1B1;CYP3A4;CYP11A1;CYP17A1;CYP19A1;CYP26A1;ACE;AKR1C1;AKR1C2;DIO2;DPP4;EGR1;ESR1;AKR1B1;FSHB;NR5A1;GATA3;GHRHR;NR3C1;HIF1A;HSD3B1;HSD3B2;HSD17B1;HSD17B3;HSD17B2;IGF1R;LEP;LHB;LHCGR;LIPE;ARNT;MME;NFKB1;HSD17B7;PDGFRA;WNT4;UGT2B28;UGT1A1;MED1;RBP1;REN;SPP1;SRD5A1;SRD5A2;SULT1E1;SULT1A1;SULT2A1;TSPO;PAX8;DHRS11;STC2;AKR1C3	11.519	7.01e-36
GOBP_NEGATIVE_REGULATION_OF_CELL_CELL_ADHESION	LILRB2;LILRB1;CTLA4;ERBB2;AKT1;PTPN22;TNFRSF21;GLI3;CD274;TBX21;ANXA1;HLA-DRB1;HLA-G;HMGB1;IHH;IL1RN;IL2;IL2RA;IL4;IL10;IDO1;ARG1;LGALS3;LGALS9;MIR141;MIR181C;MIR21;MIR31;EPCAM;MDK;NOTCH1;NOTCH4;FOXP3;PLG;PPARA;PTEN;BCL6;CCL21;CCL25;SDC4;CXCL12;WNK1;BMP4;TGFB1;VEGFA;CASP3;RUNX1;RUNX3;ADIPOQ;CD86;CD74;CDH1	13.1545	8.26e-36
GOBP_CYTOSKELETON_ORGANIZATION	KIF20A;CDKN1B;PAK4;MYL9;CIB1;PDLIM5;DCTN6;CFL1;AKAP13;CCR7;CLDN3;CRK;CRMP1;CSF1R;CSF3;CCN2;CTNNB1;DPYSL2;S1PR1;EDN1;AIF1;EPHA3;F2RL1;FKBP4;SIRT1;NUP62;ALOX15;MTOR;LMOD1;RNF19A;POLDIP2;GJA1;ANKRD1;ANG;ANK1;CXCL1;GSK3B;TMOD3;ANXA1;HCK;HLA-DRB1;BIRC5;APOE;IL1A;AQP1;ITGB1;ITGB3;KISS1;KRAS;RHOC;RHOG;STMN1;LIMK1;LMNB1;MIR143;MIR145;MIR20A;MIR21;MIR214;TACSTD2;SMAD3;SMAD4;MAP2;MDK;MECP2;MET;MLH1;NEFM;NT…	3.95655	8.76e-36
GOBP_B_CELL_PROLIFERATION	ADA;RASGRP1;CDKN1A;FCRL3;CTLA4;AHR;EPHB2;TNFRSF21;HSPD1;IFNA1;IFNA13;IL2;IL4;IL7;IL7R;IL9;IL10;IL13;LYN;MIF;ATM;PRLR;PTEN;PTPRC;BAX;IL21;BCL2;BCL6;BTK;TLR4;TYROBP;CASP3;CARD11;IRS2;WNT3A;CD19;MS4A1;CD40LG;CD74;CD79A	23.507	1.24e-35
GOBP_I_KAPPAB_KINASE_NF_KAPPAB_SIGNALING	NOD1;AKAP13;CHUK;CCR7;SIRPA;CTH;CTNNB1;CX3CR1;EDN1;EDNRA;AKT1;ESR1;F2R;F2RL1;SIRT1;NUP62;GJA1;ANGPT1;CCDC22;GSTP1;HDAC1;HLA-DRB1;BIRC2;BIRC3;TICAM2;IL1A;IL1B;FASLG;RHOC;LGALS1;LGALS9;LTF;MIR195;MIR27B;NFKBIA;TREM2;PPP5C;PRKCB;RELA;ROCK1;S100A4;S100B;CCL19;CCL21;CX3CL1;SLC20A1;BTK;TLR2;TLR3;TLR4;TNF;TNFRSF1A;CARD11;TNFSF10;SQSTM1;BCL10;USP10;ADIPOQ;CD36;CD74	10.0385	1.75e-35
GOBP_PRODUCTION_OF_MOLECULAR_MEDIATOR_OF_IMMUNE_RESPONSE	NOD1;CD226;LILRB1;PHB2;FCRL3;CD55;EPHB2;ERCC1;F2RL1;SIRT1;PTPN22;GATA3;ANGPT1;MSH6;TBX21;HK1;HLA-DPB1;HLA-DQB1;HLA-DRB1;HLA-G;HSPD1;APOA2;IL1B;IL1R1;IL2;IL4;IL6;IL10;IL13;IL17A;IL18;KIR2DL4;ARG1;LGALS4;MIF;MLH1;MSH2;FOXP3;AXL;B2M;PTPRC;IL21;BCL6;STAT6;TCF3;BTK;TGFB1;TGFB2;TGFB3;TLR3;TLR4;TNF;TNFRSF1B;TWIST1;CCR2;XBP1;XRCC4;IL18R1;BCL10;IL33;CD86;CD36;CD40LG;CD74	9.06822	1.77e-35
GOBP_RESPONSE_TO_METAL_ION	PDCD6;ABCB6;CDKN1B;NDRG1;CEBPA;TXNIP;CHUK;LRRK2;CREB1;PARP1;CYP1A1;CYP1A2;DNMT3A;DRD2;EDN1;EGFR;ERCC1;AKT1;FGA;FOS;ALOX15;SLC40A1;HIF1A;HSD17B1;IL1A;AQP1;AQP2;IMPA2;JUN;ARG1;MAOB;MMP9;MNAT1;NFE2L2;OGG1;TNFRSF11B;PCNA;SERPINF1;PPP5C;MAPK1;MAPK3;MAPK8;B2M;PTGS2;CCND1;BCL2;SDC1;SLC1A1;SOD1;SOD2;BRAF;BSG;SYT1;TERT;THBS1;TSPO;VCAM1;CASP3;CASR;CAT;AKR1C3;BECN1;CLDN1;CD14;CDK1;CDH1	8.62876	2.11e-35
GOBP_HEART_MORPHOGENESIS	YAP1;SEMA3C;CTNNB1;S1PR1;EDN1;EDNRA;MEGF8;EPHB4;FGFR2;DKK1;PLXND1;HEY1;MTOR;GATA3;GATA6;ANKRD1;PDCD4;HIF1A;CCN1;RBPJ;IHH;ILK;INSR;JUN;MIR17;MIR195;MIR20A;MIR21;SMAD3;SMAD4;MDM2;NOS3;NOTCH1;DLL4;MED1;PSEN1;SFRP2;BMP4;BMP7;SLIT3;SNAI2;SNAI1;SOX9;TEK;TGFB1;TGFB2;TGFB3;TGFBR1;CLDN5;TP53;TWIST1;VEGFA;NRP1;WNT3A;SLIT2;HAND2;CDC42	10.7423	3.95e-35
GOBP_EPITHELIAL_TO_MESENCHYMAL_TRANSITION	PDCD6;COL1A1;CTNNB1;DDX5;EDN1;EDNRA;EPHA3;EZH2;FGFR2;HEY1;MTOR;GATA3;GREM1;PDCD4;GSK3B;HDAC2;HGF;HIF1A;FOXA2;IGF1;RBPJ;IL1B;IL6;MIR21;SMAD2;SMAD3;SMAD4;MDK;NOTCH1;NOTCH4;WNT4;PTEN;ROCK1;S100A4;SFRP1;SFRP2;BMP4;BMP7;SNAI2;SNAI1;SOX9;TGFB1;TGFB1I1;TGFB2;TGFB3;TGFBR1;TWIST1;HMGA2	14.7603	4.48e-35
GOBP_KIDNEY_EPITHELIUM_DEVELOPMENT	YAP1;CTNNB1;AGT;AGTR2;EDNRA;FGF1;FGF2;FGFR2;GATA3;GREM1;GDNF;GLI3;HOXA11;CXCR2;AQP1;ILK;HES5;LIF;TACSTD2;EPCAM;SMAD2;SMAD3;SMAD4;MYC;NOTCH1;PAX2;WNT4;RARB;BCL2;SDC1;SDC4;SFRP1;BMP4;BMP7;SOX9;HNF1B;TCF21;VEGFA;WT1;PAX8;CAT;PROM1;SLIT2;ADIPOQ;HS3ST3B1	16.8217	5.82e-35
GOBP_NEGATIVE_REGULATION_OF_MAPK_CASCADE	SIRPA;CSK;AGT;DUSP1;DUSP2;DUSP6;EPHB2;F2RL1;FBLN1;FOXM1;FOXO1;NUP62;PTPN22;GBA;PDCD4;GPER1;GSTP1;APOE;IGF1R;IL1B;LIF;LYN;MIR20A;MIR200C;MIR21;SMAD4;MYC;PIK3CB;ERRFI1;TREM2;PPARG;PPP2R1A;PSMD10;PTEN;MIR503;SEMA6A;PTPRC;SFRP1;SFRP2;BMP4;BMP7;TIMP3;TLR4;UCHL1;EZR;HYAL2;HDAC3;ADIPOQ;NCOR1	14.0524	5.94e-35
GOBP_POSITIVE_CHEMOTAXIS	DEFB4A;S1PR1;F2RL1;F3;FGF2;FPR2;GDNF;ANGPT1;ANGPT2;HGF;HMGB1;CXCL8;IL16;CXCL10;ITGA2;KDR;LGALS3;SMAD3;MET;MIF;NTF3;NTRK3;PGF;CCL5;CCL16;CX3CL1;CXCL12;BMP4;VEGFA;VEGFC;CASR;NRP1;ARTN	39.7921	6.53e-35
GOBP_NEGATIVE_REGULATION_OF_MYELOID_CELL_DIFFERENTIATION	CDK6;CIB1;LILRB1;H4-16;CTNNB1;FBN1;GABPA;GATA2;IAPP;IL4;INHA;INHBA;LTF;LYN;MYB;MYC;NFKBIA;TNFRSF11B;KLF13;PF4;H4C15;SFRP1;TLR3;TLR4;ZFP36;H4C9;H4C1;H4C4;H4C6;H4C12;H4C11;H4C3;H4C8;H4C2;H4C5;H4C13;H4C14;ADIPOQ	25.4752	6.69e-35
GOBP_MUSCLE_CELL_MIGRATION	CRK;CYP1B1;ACE;AGT;AIF1;FGF9;MSTN;ANXA1;APEX1;IGF1;IGFBP3;ITGA2;ITGB3;MIR143;MIR20A;MIR21;MIR214;MIR34A;MDK;MIR135B;NFE2L2;P2RY6;SERPINE1;PDGFA;PDGFRB;PLAU;MIR451A;MIR503;BCL2;ROCK1;CCL5;SRC;TACR1;TERT;TLR4;VTN;NRP1;S1PR2;SLIT2;ADIPOQ	22.1226	7.4e-35
GOBP_REGULATION_OF_STRESS_ACTIVATED_PROTEIN_KINASE_SIGNALING_CASCADE	RASGRP1;NOD1;CCR7;CRK;SIRPA;CCN2;DUSP1;EGFR;F2RL1;FOXM1;FOXO1;PLCB1;PTPN22;GREM1;PDCD4;GSTP1;HGF;HMGB1;IGF1R;IGFBP6;FAS;IL1A;IL1B;LEP;LGALS9;LYN;MIR20A;MYC;TREM2;MAPK1;MAPK3;MAP2K1;MAP2K7;CCL19;CCL21;SFRP1;SFRP2;BMP4;TGFB2;TLR3;TLR4;TNF;VEGFA;EZR;WNT7A;AXIN1;FZD7;HDAC3;HAND2;NCOR1;RASSF2	12.8897	8.29e-35
GOBP_PEPTIDYL_SERINE_MODIFICATION	CHUK;LRRK2;MAPK14;CSF3;DCN;EGFR;EPO;AKT1;DKK1;MTOR;GALNT3;ANGPT1;GSK3B;HGF;IFNA1;IFNA13;IFNG;IL6;IL11;ILK;LIF;MIR132;MIF;ATM;NGF;NOS1;NTF3;NTF4;NTRK2;NTRK3;PAK1;PIK3CA;PLK1;PRKCA;PRKCB;MAPK1;MAPK8;PTEN;PTGS2;BAX;RAF1;BCL2;ROCK1;BDNF;SFRP2;SLC1A1;WNK1;SRC;BRAF;TDGF1;TGFB1;TGFBR1;TNF;TXN;UCN;VEGFA;NDNF;AXIN1;BCAR3;WNT3A;CD44;RASSF2;CDK1	8.95175	1.11e-34
GOBP_REGULATION_OF_TRANSMEMBRANE_TRANSPORT	ABCC9;CFTR;SCN11A;CHRM3;PHB2;CRH;CRHR1;MAPK14;CNIH3;DAPK1;ACE;DPP6;DRD2;AGT;EDN1;EDNRA;EPHB2;EPO;AKT1;F2;F2R;NEDD4L;GH1;GPER1;REM1;GSTM2;IFNG;IGF1;IL1B;IL13;CXCL10;INSR;ITGB1;ITGB3;KCNQ1;KCNQ2;ARG1;LEP;LHCGR;LYN;MIR143;MIR200C;MIR21;MIR210;MIR34A;CXCL9;MMP9;NFE2L2;NOS1;OPRM1;P2RX3;P2RX5;P2RY6;ENPP1;PIK3CG;TREM2;PRKCB;PSEN1;MIR451A;BAX;BCL2;RGS4;ACTB;CCL2;CX3CL1;WNK1;BRAF;TERT;THBS1;THY1;TNF;C3;TR…	6.10334	1.25e-34
GOBP_RESPONSE_TO_INTERLEUKIN_1	SIRPA;EDN1;EGR1;EPO;PLCB1;ANKRD1;ANXA1;HIF1A;IL1B;IL1R1;IL1RN;IL6;CXCL8;IL17A;LGALS9;MIR142;MIR204;MIR21;MMP2;NFKB1;PRKCA;MAPK3;MAP2K7;RELA;CCL1;CCL2;CCL5;CCL11;CCL14;CCL16;CCL17;CCL19;CCL21;CCL22;CCL25;CX3CL1;SELE;SFRP1;SOX9;SRC;IL1R2;HYAL2;USP10;CD47	17.2906	1.26e-34
GOBP_ANATOMICAL_STRUCTURE_HOMEOSTASIS	CDH3;YAP1;CLCN3;CLDN3;CSF1;CSF1R;CSK;CCN2;CTNNB1;S1PR1;ERCC6;ESRRB;ALB;F2R;FSHB;GATA2;MSTN;GJA1;ANGPT1;HIF1A;ACACA;HOXA13;IAPP;IHH;IL6;IL7;IL17A;ITGB1;ITGB3;KDR;KRAS;LOX;LTF;MUC2;MUC4;NOS3;NOTCH1;TNFRSF11B;PLG;PRKCA;PSEN1;B2M;PTGS2;BAX;RB1;BCL2;ACTB;CX3CL1;SLC1A1;SLC2A1;SOD1;SOX9;SPP1;SRC;TFF3;TLR4;CLDN5;VEGFA;CA2;CALCA;DCSTAMP;PROM1;CLDN1	8.9184	1.33e-34
GOBP_METAL_ION_TRANSPORT	ABCB6;DNM1L;ABCC9;CDKN1B;LILRB2;LILRB1;SCN11A;FCRL3;CCR1;CCR5;CCR7;CRHR1;ADRA1A;CCN2;CTNNB1;ACE;DPP6;DRD2;AGT;EDN1;EDNRA;EGF;EPO;AKT1;F2;F2R;FGF2;FKBP4;NEDD4L;GPER1;REM1;GSTM2;SLC40A1;ANXA2;IFNG;FASLG;AQP1;IL13;IL16;CXCL10;ITGAV;ITGB1;ITGB3;KCNQ1;KCNQ2;LGALS3;LHCGR;LTF;LYN;MIR200C;MIR21;MIR210;MIR34A;CXCL9;NOS1;NOS3;OPRM1;P2RX3;P2RX5;P2RY6;PDGFRB;PIK3CG;TREM2;PRKCB;PSEN1;B2M;PTGS2;PTPRC;BAX;NECTI…	4.95268	1.52e-34
GOBP_ESTABLISHMENT_OF_PROTEIN_LOCALIZATION	PDCD6;DNM1L;KIF20A;CDKN1A;CIB1;TXNIP;CFTR;HPSE;PHB2;UCN3;LRRK2;CNR1;COL1A1;MAPK14;CSE1L;CSK;DRD2;AGT;EDNRA;EGFR;ELAVL1;ERBB2;AKT1;F2R;F2RL1;FGA;FGF9;FOXO1;NUP210;ASTN2;NUP62;NECTIN3;ANKRD1;GLI3;ANG;ANGPT1;GPER1;CCDC22;GSK3B;ANXA1;HIF1A;HK1;HLA-DRB1;FOXA2;HSPA4;HSPD1;IFI27;IFIT1;IFNG;IGF1;APOE;TICAM2;IL1A;IL1B;IL1RN;IL6;IL12B;IL13;ITGA2;ITGAM;USP17L2;LEP;LHCGR;MIR148A;MIR17;MIR30C1;SMAD2;SMAD3;MDM…	3.72188	2.13e-34
GOBP_POSITIVE_REGULATION_OF_LYMPHOCYTE_MEDIATED_IMMUNITY	KLRC4-KLRK1;RASGRP1;CD226;CD55;KLRK1;CADM1;NCR3;GATA3;TBX21;HLA-B;HLA-DRB1;HLA-G;HSPD1;IL1B;IL1R1;IL2;IL4;IL6;IL12B;IL12RB1;IL18;KIR2DL4;LTA;SH2D1A;MLH1;MSH2;FOXP3;IL23A;TREM2;B2M;PTPRC;PVR;IL21;STAT6;BTK;TGFB1;TNF;C3;VAV1;ZP3;IL18R1	19.7826	3.33e-34
GOBP_INTERFERON_GAMMA_PRODUCTION	KLRC4-KLRK1;RASGRP1;CD226;LILRB1;CCR7;SIRPA;F2RL1;KLRK1;IL27;PTPN22;GATA3;CD274;HLA-DPB1;HLA-DRB1;HMGB1;HSPD1;IL1B;IL1R1;IL2;IL10;IL12B;IL12RB1;IL18;INHA;INHBA;LGALS9;LTA;FOXP3;IL23A;AXL;IL21;TLR3;TLR4;TNF;CCR2;TYK2;ZP3;IL18R1;IL33;CD14;CD47	19.7826	3.33e-34
GOBP_STRIATED_MUSCLE_TISSUE_DEVELOPMENT	YAP1;SEMA3C;PDLIM5;AKAP13;CREB1;MAPK14;ADRA1A;AGT;S1PR1;EDN1;EDNRA;FGF2;FGF9;FGFR2;DKK1;HEY1;MTOR;GATA6;GREM1;GJA1;ANKRD1;FOXP1;GLI1;ID2;IGF1;RBPJ;ITGB1;LOX;MIR195;MIR200B;MIR204;SMAD3;SMAD4;NOTCH1;PDGFRA;PDGFRB;DLL4;PPARA;MED1;PTEN;RARB;RGS4;BMP4;BMP7;SOX15;TGFB1;TGFB2;TGFBR1;TWIST1;VEGFA;WT1;FZD7;RUNX1;WNT3A;CDK1;CDC42	10.5449	3.4e-34
GOBP_CARDIOCYTE_DIFFERENTIATION	SEMA3C;PDLIM5;AKAP13;ADRA1A;AGT;EDN1;EDNRA;EGFR;DKK1;MTOR;GATA6;GREM1;FOXP1;PDCD4;GPER1;IGF1;RBPJ;INHBA;ITGB1;MIR145;MIR195;MIR200B;MIR204;MIR21;SMAD4;NOTCH1;PDGFRA;PDGFRB;PPARA;MAPK1;MAPK3;RARB;RGS4;BMP4;BMP7;TGFB1;TGFB2;TWIST1;VCAM1;VEGFA;WT1;FZD7;WNT3A;HAND2;CDK1;CDC42	15.2374	3.48e-34
GOBP_ACTIN_FILAMENT_BASED_PROCESS	ABCC9;MYL9;PDLIM5;CFL1;AKAP13;CCR7;CLDN3;CRK;CSF1R;CSF3;CCN2;S1PR1;EDN1;AIF1;EPHA3;F2RL1;NEDD4L;ALOX15;MTOR;LMOD1;GJA1;ANKRD1;ANG;CXCL1;TMOD3;ANXA1;HCK;IL1A;AQP1;ITGB1;ITGB3;KCNQ1;KRAS;RHOC;RHOG;STMN1;LIMK1;MIR143;MIR145;MIR20A;MIR21;MIR214;TACSTD2;SMAD3;SMAD4;MDK;MET;NTF3;NTRK3;PAK1;PDGFA;PDGFRA;PDGFRB;PIK3CA;WNT4;RHOF;FGD6;PTGER4;ACTA2;RASA1;BCL2;RGS4;ACTB;BCL6;ROCK1;CCL11;CCL21;CX3CL1;SDC4;CXC…	5.1913	3.94e-34
GOBP_RESPONSE_TO_TRANSFORMING_GROWTH_FACTOR_BETA	COL1A1;CRK;PARP1;CX3CR1;EDN1;FBN1;FGFR2;SIRT1;FOS;FSHB;MSTN;AMHR2;ANKRD1;NR3C1;HDAC1;HDAC2;HPGD;IGF1R;IL4;ITGB1;ITGB8;JUN;ARG1;LOX;MIR183;MIR21;MIR30A;SMAD2;SMAD3;SMAD4;MIR342;PDGFA;WNT4;PPARA;PPARG;HTRA1;ROCK1;SFRP1;SOX9;SRC;STAT3;ADAM17;ZEB1;TGFB1;TGFB1I1;TGFB2;TGFB3;TGFBR1;THBS1;CLDN5;TP53;WNT7A;TET1;DCSTAMP;AXIN1;RUNX3;HYAL2;CLDN1	9.90625	4.18e-34
GOBP_LIPID_LOCALIZATION	ABCC4;CETP;CFTR;ANO4;CRABP2;CRH;CRHR1;CRP;TTC39B;CYP19A1;ACE;AKR1C1;DRD2;AGT;AGTR1;EDN1;EGF;AKT1;SIRT1;GBA;ANXA1;ANXA2;APOA2;APOE;IL1A;IL1B;FASLG;IL6;INHBA;AQP9;ITGAV;ITGB3;KCNQ1;LEP;LHCGR;LIPC;LPA;MIR10B;MIR148A;MIR17;MIR27B;MIR30C1;MIR33A;MIR34A;MIF;NFKB1;NFKBIA;NOS2;ENPP1;PLA2G2A;TREM2;PON1;PPARA;PPARG;RETN;PTGS2;RBP1;REN;RXRA;SLC2A1;SPP1;SSTR4;STAR;MIR33B;THBS1;TSPO;TNF;C3;NR0B2;IRS2;ADIPOQ;L…	6.96193	4.79e-34
GOBP_ENDOTHELIUM_DEVELOPMENT	HPSE;CLDN3;CTNNB1;S1PR1;EDNRA;F2RL1;FGF1;PLCB1;HEY1;FOXP1;SLC40A1;HOXA13;ICAM1;RBPJ;IL1B;CXCL10;KDR;MIR200C;MIR21;MIR34A;SMAD4;MET;NOTCH1;NOTCH4;FOXP3;ROBO4;DLL4;ROCK1;BMP4;STC1;ZEB1;BTG1;NR2F2;CLDN5;TNF;TNFRSF1A;VEGFA;EZR;CXCR4;COL18A1;NRP1;CLDN1;S1PR2;ACVR2B	16.598	4.97e-34
GOBP_NEUROINFLAMMATORY_RESPONSE	LRRK2;CD200R1;CX3CR1;AIF1;IFNG;IFNGR1;IGF1;IL1B;IL4;IL6;IL13;IL18;ITGAM;ITGB1;JUN;MIR142;MIR181C;MIR195;MMP3;MMP9;CD200;ATM;TREM2;PSEN1;PTGS2;PTPRC;CX3CL1;TLR2;TLR3;TNF;TNFRSF1B;TYROBP;TRPV1;IL33	32.6288	5.78e-34
GOBP_REGULATION_OF_MIRNA_TRANSCRIPTION	DDX5;EGR1;ETS1;FGF2;FOXO3;FOS;GATA2;GATA3;GATA6;NR3C1;HIF1A;IL10;JUN;SMAD3;SMAD4;MYB;MYC;NGFR;POU5F1;PPARA;PPARG;PRL;RELA;BMP4;SOX9;STAT3;TERT;TGFB1;TGFB2;TNF;TP53;WT1	39.8384	6.53e-34
GOBP_MITOTIC_CELL_CYCLE_PROCESS	KIF20A;CDK4;CDK6;CDKN1A;CDKN1B;CDKN2A;CDKN3;KHDRBS1;DCTN6;CFL1;PHB2;CKS1B;CYP1A1;DUSP1;EDN1;EGF;EGFR;EIF4EBP1;AIF1;ERCC2;AKT1;ESRRB;EZH2;FANCD2;FOXM1;PLCB1;NUP62;POLDIP2;GJA1;TMOD3;ANXA1;HOXA13;APEX1;BIRC5;ID2;IGF1;IL1A;IL1B;INHBA;INSR;ITGB1;RHOC;STMN1;MIR195;MIR214;MIR29C;MIR30C2;MDM2;MECP2;MNAT1;MSH2;MUC1;MYC;ATM;PCNA;RMDN1;PDGFRB;PLK1;POLE;PPP2R1A;PRKCA;PRKCB;PTEN;MIR451A;RASA1;RB1;CCND1;BCL2;…	5.25894	7.19e-34
GOBP_PHAGOCYTOSIS	OLFM4;CLCN3;CRP;SIRPA;CSK;AHSG;AIF1;F2RL1;FPR2;ALOX15;GATA2;ANXA1;HCK;HMGB1;APOA2;IFNG;TICAM2;IL1B;IL2RB;IL15;ITGA2;ITGAM;ITGAV;ITGB1;ITGB3;RHOG;LEP;LEPR;LIMK1;LYN;MIR17;MIR183;MIR20A;MBL2;MET;MST1R;P2RY6;PAK1;PIK3CA;TREM2;AXL;PTPRC;CCL2;ATG3;SOD1;SRC;BTK;THBS1;TLR2;TLR4;TNF;C3;TYROBP;VAV1;BECN1;CD14;ADIPOQ;CD36;CD47;CDC42	9.26419	7.77e-34
GOBP_REGULATION_OF_NEURON_PROJECTION_DEVELOPMENT	UST;PLXNC1;CARM1;SEMA3C;CIB1;PDLIM5;CFL1;LRRK2;CNR1;CRABP2;CRK;CRMP1;AGT;MEGF8;EPHA3;EPHB2;EPO;AKT1;EZH2;FKBP4;DKK1;PLXND1;NEDD4L;FN1;LPAR3;GATA3;MYLIP;GSK3B;HDAC2;HGF;APOE;IGF1R;L1CAM;LIMK1;LYN;MIR200C;MIR210;MAP2;MDK;NFE2L2;NGF;NTRK2;NTRK3;PAK1;SERPINF1;MAP2K1;PSEN1;B2M;PTEN;SEMA6A;PTN;PTPRD;BDNF;CX3CL1;CXCL12;SFRP1;SFRP2;GORASP1;BMP7;SPP1;BRAF;THY1;VEGFA;VIM;WNT7A;NDNF;NRP1;WNT3A;SLIT2;SEMA3E;…	7.27032	8.47e-34
GOBP_REGULATION_OF_LIPID_TRANSPORT	CETP;CRH;CRHR1;TTC39B;CYP19A1;AGT;AGTR1;EDN1;EGF;AKT1;SIRT1;ANXA2;APOA2;APOE;IL1A;IL1B;FASLG;ITGAV;ITGB3;LEP;MIR148A;MIR17;MIR27B;MIR30C1;MIR33A;MIR34A;MIF;NFKB1;NFKBIA;TREM2;PON1;PPARA;PPARG;RETN;REN;RXRA;SPP1;SSTR4;MIR33B;THBS1;TSPO;IRS2;ADIPOQ;LIPG;PTGES	15.4356	1.12e-33
GOBP_NEUTROPHIL_MIGRATION	DNM1L;OLFM4;CXCL13;CCR7;DPP4;EDN1;DAPK2;CXCL1;IL1A;IL1B;IL1R1;CXCL8;CXCR1;CXCR2;CXCL10;RHOG;LGALS3;MDK;CXCL9;IL23A;PF4;PF4V1;PIK3CD;PIK3CG;CCL1;CCL2;CCL5;CCL11;CCL14;CCL16;CCL17;CCL19;CCL21;CCL22;CCL25;CXCL5;CX3CL1;BSG;TGFB2;VAV1;SLIT2;CD74	17.9755	1.12e-33
GOBP_IMMUNE_RESPONSE_REGULATING_CELL_SURFACE_RECEPTOR_SIGNALING_PATHWAY	ADA;KLRC4-KLRK1;LILRB2;KHDRBS1;CD226;LILRB1;FCRL3;CCR7;CD200R1;CSK;CTLA4;FCGR3A;KLRK1;FPR1;FPR2;NCR3;PTPN22;GATA3;FOXP1;TNFRSF21;HCK;HLA-DPB1;HLA-DQB1;HLA-DRB1;HLA-G;KIR2DL1;KLRC1;LGALS3;LIMK1;LYN;SH2D1A;MIR34A;MBL2;PAK1;FOXP3;PIK3CA;PIK3CD;PRKCB;MAPK1;MAPK8;MAP2K7;PSEN1;PTPRC;BAX;BCL2;RELA;WNK1;SRC;BRAF;BTK;THY1;TYROBP;VAV1;EZR;BAG6;CARD11;SKAP1;BCL10;CD19;MS4A1;CD47;CD79A	8.73632	1.18e-33
GOBP_ENDOCYTOSIS	DNM1L;LILRB1;CLCN3;LRRK2;ADM;CRP;DPP4;DPYSL2;DRD2;EGF;AHSG;AIF1;EPHA3;F2RL1;DKK1;NEDD4L;SH3BP4;ALOX15;GATA2;GREM1;GH1;ANGPT1;ANXA2;CFI;APOE;IL4;CXCL8;CXCR1;CXCR2;INSR;ITGA2;ITGAM;ITGAV;ITGB1;ITGB3;RHOG;LGALS3;MIR17;MIR205;MIR27B;MBL2;MRC1;NME1;NTF3;SERPINE1;ENPP1;PIK3CB;PIK3CG;TREM2;PPT1;AXL;MAPK1;MAPK3;PSEN1;B2M;ACKR3;CXCL16;BCL2L1;ACTB;ROCK1;SAG;SRL;CCL19;CCL21;SDC1;SELE;SLC2A4;SNCG;SRC;SYP;SYT…	5.80635	1.29e-33
GOBP_SENSORY_SYSTEM_DEVELOPMENT	CDKN1B;OSR2;CTNNB1;CYP1A1;CYP1B1;DRD2;EGFR;EPHB2;FBN1;FGF2;FGF9;ZHX2;FLT1;FJX1;NECTIN3;GATA3;GLI3;HDAC1;HDAC2;HIF1A;IHH;FASLG;AQP1;AQP5;INHBA;ITGAM;JUN;KDR;HES5;SMAD3;NHS;NOTCH1;NTRK2;PAX2;PDGFRA;PDGFRB;SERPINF1;DLL4;MED1;PSEN1;BAX;NECTIN1;RARB;BCL2;RORB;SLC1A1;BMP4;BMP7;BMPR1B;SOX2;SOX9;STAT3;ZEB1;TGFB2;TGFBR1;THY1;C3;TWIST1;VEGFA;VIM;WNT7A;WT1;BCAR3;NRP1;PROM1;ACVR2B;GDF3	7.75485	1.78e-33
GOBP_ACTIVATION_OF_PROTEIN_KINASE_ACTIVITY	PHB2;ADRA2B;DRD2;AGT;HBEGF;EGF;EGFR;EPO;FGF1;MTOR;GREM1;GH1;ANG;ANGPT1;IGF1;IL4;IL12B;IL18;INSR;ITGB3;AREG;LEP;MIR143;MIR21;MAS1;NTF3;NTRK3;IL23A;PIK3CA;MAP2K1;PRLR;CCL5;SLC1A1;WNK1;SRC;TGFB2;TLR3;TXN;UCN;VEGFA;CALCA;AXIN1;ACVR2B;CD86	15.9511	1.87e-33
GOBP_SECOND_MESSENGER_MEDIATED_SIGNALING	ADA;CIB1;CXCR6;CCR9;CHRM3;LRRK2;CCR1;CCR5;CCR7;CCR8;ADM;CREB1;CX3CR1;AGT;AGTR1;AGTR2;EDN1;EGFR;AHR;FCGR3A;FPR1;FPR2;MTOR;NR5A2;NR5A1;GHRHR;CXCR3;GSK3B;GSTM2;IGF1;APOE;CXCL8;CXCR1;CXCR2;AQP1;KDR;LHCGR;NOS1;NOS2;NOS3;P2RX3;P2RX5;TREM2;PPP2R1A;ACKR3;PTBP1;PTGFR;PTPRC;SELE;SOX9;BTK;THBS1;TNF;CCR2;UCN;VCAM1;VEGFA;CXCR4;NDNF;CD36	9.07934	2.01e-33
GOBP_EXTERNAL_ENCAPSULATING_STRUCTURE_ORGANIZATION	POSTN;MMP24;COL1A1;CPB2;CCN2;CCDC80;CYP1B1;DPP4;AGT;ERCC2;FBLN1;ABI3BP;GREM1;ANXA2;HAS1;CCN1;IHH;IL6;ITGB1;ITGB3;LAMB1;LOX;LOXL1;SMAD3;MMP1;MMP2;MMP3;MMP7;MMP9;MMP12;MMP13;MMP14;NOTCH1;TNFRSF11B;PDGFRA;PLG;SULF2;RB1;RXFP1;SMOC2;SFRP2;FSCN1;SOX9;TGFB1;TGFB2;TGFBI;TGFBR1;TNF;TNFRSF1A;TNFRSF1B;VTN;WT1;NDNF;COL18A1;MIA;CRISPLD2;LOXL4;RUNX1;SERPINH1;WNT3A;CREB3L1	8.85041	2.05e-33
GOBP_POSITIVE_REGULATION_OF_ION_TRANSPORT	CFTR;CCR1;DRD2;AGT;EDN1;EDNRA;EPHB2;AKT1;F2;F2R;GDNF;GPER1;GSTM2;IFNG;IL1A;IL1B;IL13;CXCL10;ITGB1;KCNQ1;LEP;LGALS3;LHCGR;MIR21;MIR210;MIF;CXCL9;NOS1;OXTR;P2RX3;P2RX5;P2RY6;PDGFRB;TREM2;PSEN1;BAX;ACTB;CCL2;CCL5;CX3CL1;CXCL12;WNK1;SLC6A4;SSTR4;STC1;SYT1;TSPO;THY1;TRH;TRPC6;CCR2;UCN;ACTN4;SLC38A1;CASR;CD19;MS4A1;PTGES	9.55997	2.1e-33
GOBP_POSITIVE_REGULATION_OF_ORGANELLE_ORGANIZATION	BCL2L11;DNM1L;CDKN1B;PPARGC1A;PRRT2;CCR7;CSF2;CSF3;CCN2;CTNNB1;DCN;DNMT1;EDN1;EGF;ERCC1;F2RL1;FEN1;PLCB1;NUP62;ALOX15;MTOR;LMOD1;GPER1;GSK3B;ANXA1;ANXA2;HCK;HIF1A;HOXA13;IGF1;IL1A;IL1B;INSR;KDR;RHOC;LIMK1;SMAD3;MECP2;MET;MMP9;ATM;NTF3;NTRK3;PAK1;PDGFRB;TREM2;WNT4;MAPK1;MAPK3;MAPK8;MAP2K7;BAX;RB1;CCL11;CCL21;CX3CL1;SDC1;SDC4;SFRP1;FSCN1;SRC;BRAF;SYT1;TACR1;TEK;TERF1;TGFB3;TGFBR1;TNF;TP53;BECN1;TNF…	6.65247	2.48e-33
GOBP_SMOOTH_MUSCLE_CELL_MIGRATION	CRK;CYP1B1;ACE;AGT;AIF1;FGF9;APEX1;IGF1;IGFBP3;ITGA2;ITGB3;MIR143;MIR20A;MIR21;MIR214;MIR34A;MDK;MIR135B;NFE2L2;P2RY6;SERPINE1;PDGFA;PDGFRB;PLAU;MIR451A;MIR503;BCL2;CCL5;SRC;TACR1;TERT;TLR4;VTN;NRP1;S1PR2;SLIT2;ADIPOQ	23.938	2.68e-33
GOBP_MESONEPHROS_DEVELOPMENT	OSR2;CTNNB1;AGT;AGTR2;FGF1;FGF2;FGFR2;GATA3;GREM1;GDNF;GLI3;HOXA11;ILK;TACSTD2;EPCAM;SMAD2;SMAD3;SMAD4;MYC;PAX2;WNT4;RARB;BCL2;REN;SDC1;SDC4;SFRP1;BMP4;BMP7;SOX9;HNF1B;TCF21;VEGFA;WT1;PAX8;CAT;SLIT2;HS3ST3B1	22.292	2.7e-33
GOBP_CELLULAR_RESPONSE_TO_INTERFERON_GAMMA	SIRPA;DAPK1;EDN1;AIF1;HCK;IFNG;IFNGR1;FASLG;IL12B;IL12RB1;JAK1;ARG1;LGALS9;MRC1;NOS2;PPARG;MED1;CCL1;CCL2;CCL5;CCL11;CCL14;CCL16;CCL17;CCL19;CCL21;CCL22;CCL25;CX3CL1;TDGF1;TLR2;TLR3;TLR4;TNF;TP53;VIM;NLRC5;CLDN1;CD47;CDC42	19.5339	3.01e-33
GOBP_REGULATION_OF_ESTABLISHMENT_OF_PROTEIN_LOCALIZATION	DNM1L;CIB1;CFTR;UCN3;LRRK2;CNR1;MAPK14;CSK;DRD2;ERBB2;F2R;F2RL1;FGA;FOXO1;ANKRD1;GLI3;ANG;ANGPT1;GPER1;GSK3B;HIF1A;HLA-DRB1;FOXA2;IFI27;IFNG;IGF1;APOE;IL1A;IL1B;IL6;IL12B;IL13;ITGAM;USP17L2;LEP;MIR148A;MIR17;MIR30C1;SMAD3;CD200;NOS2;OPRM1;TREM2;KRT20;PPARG;VPS11;MAPK8;PSEN1;PSMD9;PTGS2;CCL5;SFRP1;SLC1A1;BMP4;SRC;TERF1;TGFB1;TGFB2;TGFB3;TLR2;TLR4;TNF;TRH;TXN;VEGFC;EZR;NR0B2;CASR;IRS2;HYAL2;HDAC3;A…	6.51967	3.11e-33
GOBP_POSITIVE_REGULATION_OF_BLOOD_VESSEL_ENDOTHELIAL_CELL_MIGRATION	CIB1;MAPK14;AKT1;ETS1;FGF2;SIRT1;GATA2;ANGPT1;ANXA1;HIF1A;HMGB1;KDR;MIR10B;MIR126;MIR132;MIR143;MIR200A;MIR210;MIR27B;MIR30A;MIR31;MIR135B;MIR342;NFE2L2;NOS3;PRKCA;PTGS2;ADAM17;TGFB1;THBS1;VEGFA;VEGFC;NRP1;HDAC9	30.3215	3.28e-33
GOBP_GASTRULATION	CTNNB1;DUSP1;DUSP2;MEGF8;FGFR2;DKK1;FN1;GATA6;GJA1;FOXA2;HOXA11;IL1RN;IL10;INHBA;ITGA2;ITGA5;ITGAV;ITGB1;ITGB3;LAMB1;MIR145;MIR200C;SMAD2;SMAD3;SMAD4;MMP2;MMP9;MMP14;PAX2;POU5F1;MAP2K1;SFRP1;SFRP2;WNK1;BMP4;BMP7;SNAI1;SOX2;HNF1B;TP53;VTN;NANOG;HMGA2;AXIN1;FZD7;WNT3A;ACVR2B;ADIPOQ;GDF3	12.6123	3.67e-33
GOBP_ACTIVATION_OF_IMMUNE_RESPONSE	ADA;KLRC4-KLRK1;KHDRBS1;CD226;PHB2;FCRL3;CCR7;CSK;CTLA4;CD55;CFD;KLRK1;FPR1;FPR2;NCR3;PTPN22;GATA3;FOXP1;TNFRSF21;HCK;HLA-DPB1;HLA-DQB1;HLA-DRB1;HMGB1;CFI;IL1B;LGALS3;LIMK1;LYN;SH2D1A;MIR34A;MBL2;PAK1;FOXP3;PIK3CA;PIK3CD;TREM2;PRKCB;MAPK1;PSEN1;PTPRC;BAX;BCL2;RELA;WNK1;SRC;BRAF;BTK;THY1;TLR4;SERPING1;C1R;C3;C5;TYROBP;C9;VAV1;EZR;BAG6;CARD11;SKAP1;BCL10;CD19;MS4A1;CD47;CD79A	7.79823	3.91e-33
GOBP_POSITIVE_REGULATION_OF_DEVELOPMENTAL_GROWTH	YAP1;AGR2;CRABP2;CREB1;MAPK14;CSF1;ARX;DRD2;EDN1;MEGF8;AKT1;FGF2;FGF9;FGFR2;PLCB1;NEDD4L;FN1;LPAR3;GATA6;GH1;GHRH;GHRHR;GLI1;IGF1;RBPJ;IL7;INSR;L1CAM;LEP;LIMK1;MIR204;NGF;NOTCH1;BCL2;BDNF;CXCL12;SOX15;SYT1;VEGFA;EZR;WT1;ZP3;CXCR4;NRP1;WNT3A;CDK1	14.2377	3.91e-33
GOBP_REGULATION_OF_MORPHOGENESIS_OF_AN_EPITHELIUM	PHB2;CTNNB1;AGT;AGTR2;EGF;ESR1;FGF1;FGF2;GATA3;GREM1;GDNF;GJA1;FOXP1;HGF;CXCL10;AR;LIF;MIR21;TACSTD2;MDK;PAX2;PDGFA;PIK3CD;WNT4;SFRP1;BMP4;BMP7;SNAI2;SOX9;TNF;VEGFA;PAX8	36.2281	4.84e-33
GOBP_STEROID_BIOSYNTHETIC_PROCESS	CFTR;CYP2R1;ADM;CRH;CYP1A1;CYP3A4;CYP11A1;CYP17A1;CYP19A1;EGR1;FGF1;AKR1B1;SIRT1;FSHB;NR5A1;NR3C1;HSD3B1;HSD3B2;HSD17B1;HSD17B3;HSD17B2;IFNG;APOE;IGF1R;IGFBP7;IL1A;LBR;LEP;LHB;LHCGR;MIR30C1;MIR33A;NFKB1;HSD17B7;WNT4;MED1;PRLR;SNAI2;SNAI1;SOD1;SRD5A1;SRD5A2;STAR;TSPO;TNF;DHRS11;AKR1C3	13.4555	6.48e-33
GOBP_MYELOID_CELL_HOMEOSTASIS	BCL2L11;CDK6;ADAR;MAPK14;CSF1;EPO;ERCC2;ETS1;FOXO3;GATA2;GATA3;TMOD3;ANXA1;HIF1A;HMGB1;ID2;IL6;CXCR2;INHA;INHBA;KCNQ1;ARNT;LYN;KITLG;MYB;FOXP3;KLF13;PIK3CB;PIK3CD;MED1;AXL;B2M;BAX;RB1;BCL6;BMP4;SOD1;STAT3;ADAM17;BTK;THRA;VEGFA;ZFP36;CASP3;ACVR1B;SFXN1	14.008	7.01e-33
GOBP_NEPHRON_DEVELOPMENT	YAP1;CTNNB1;AGT;AGTR2;EDNRA;EGR1;FGF1;FGF2;GATA3;GREM1;GDNF;GLI3;ANGPT1;ANGPT2;HOXA11;AQP1;ILK;ITGB3;HES5;LIF;TACSTD2;SMAD4;MYC;NOTCH1;PAX2;PDGFA;PDGFRA;PDGFRB;WNT4;SULF2;ACTA2;BCL2;BMP4;BMP7;SOX9;HNF1B;TCF21;TEK;VEGFA;WT1;PAX8;PROM1;ADIPOQ;HS3ST3B1	15.2178	9.23e-33
GOBP_NEUTROPHIL_CHEMOTAXIS	DNM1L;CXCL13;CCR7;DPP4;EDN1;DAPK2;CXCL1;IL1B;CXCL8;CXCR1;CXCR2;CXCL10;LGALS3;MDK;CXCL9;IL23A;PF4;PF4V1;PIK3CD;PIK3CG;CCL1;CCL2;CCL5;CCL11;CCL14;CCL16;CCL17;CCL19;CCL21;CCL22;CCL25;CXCL5;CX3CL1;BSG;TGFB2;VAV1;SLIT2;CD74	21.2927	9.8e-33
GOBP_REGULATION_OF_MITOTIC_CELL_CYCLE	SRA1;CDK4;CDKN1A;CDKN1B;CDKN2A;PHB2;CKS1B;CTNNB1;CYP1A1;DUSP1;EDN1;EGF;EGFR;EIF4EBP1;AIF1;ERCC2;AKT1;EZH2;FANCD2;PLCB1;SIRT1;NUP62;POLDIP2;TMOD3;ANXA1;HOXA13;APEX1;BIRC5;ID2;IGF1;IL1A;IL1B;IL10;INHBA;INSR;MIR195;MIR21;MIR214;MIR29C;MIR30C2;MDM2;MECP2;MNAT1;MSH2;MUC1;ATM;PDGFRB;PLK1;PRKCA;PTEN;MIR451A;RB1;CCND1;BCL2;ACTB;BCL6;CCL2;SMOC2;BMP4;BMP7;SMARCC1;BRCA1;BRCA2;ADAM17;BTG1;TERT;TFDP1;TNF;TP53…	6.48633	1.06e-32
GOBP_TISSUE_HOMEOSTASIS	CDH3;YAP1;CLCN3;CLDN3;CSF1;CSF1R;CSK;CCN2;CTNNB1;S1PR1;ERCC6;ESRRB;ALB;F2R;FSHB;GATA2;GJA1;ANGPT1;ACACA;HOXA13;IAPP;IHH;IL6;IL7;IL17A;ITGB1;ITGB3;KDR;KRAS;LTF;MUC2;MUC4;NOS3;NOTCH1;TNFRSF11B;PRKCA;B2M;PTGS2;BAX;RB1;BCL2;ACTB;SLC1A1;SLC2A1;SOD1;SOX9;SPP1;SRC;TFF3;TLR4;CLDN5;VEGFA;CALCA;DCSTAMP;PROM1;CLDN1	9.72285	1.21e-32
GOBP_HEMOSTASIS	MYL9;HPSE;CPB2;MAPK14;ADRA2B;EDN1;EPHB2;F2;F2R;F2RL1;F3;FBLN1;FGA;FN1;ANXA2;FOXA2;APOE;IL6;ILK;ITGA2;ITGB3;KNG1;LYN;NFE2L2;NOS3;SERPINE1;SERPINB2;PDGFA;PDGFRA;PF4;PF4V1;SERPINA1;PIK3CA;PIK3CB;PIK3CG;PLAU;PLG;PRKCA;AXL;ACTB;SRC;THBS1;TLR4;SERPING1;VAV1;VTN;VWF;ACTN1;WNT3A;CD36;ENTPD1;CD40LG	10.9526	1.42e-32
GOBP_ION_HOMEOSTASIS	ABCB6;CFTR;CLCN3;LRRK2;CCR1;CCR5;CCR7;ADM;ACE;DRD2;AGT;AGTR1;EDN1;EDNRA;F2;F2R;FGF2;SLC7A8;GPER1;CCDC22;GSTM2;SLC40A1;HIF1A;IFNG;APOE;IL1A;FASLG;IL13;CXCL10;ITGB3;KCNQ1;KDR;LHCGR;LTF;LYN;MIR210;SMAD4;CXCL9;MYC;NOS1;NT5E;P2RY6;ENPP1;ENPP3;PIK3CB;RMDN3;PPT1;PRKCB;MAPK1;MAPK3;ANKH;PSEN1;B2M;PTPRC;BAX;BCL2;CCL1;CCL5;CCL11;CCL14;CCL19;CCL21;CX3CL1;CXCL12;SLC1A1;WNK1;SOD1;SOD2;STC1;TACR1;THY1;TPT1;TRPC…	5.81433	1.47e-32
GOBP_NEGATIVE_REGULATION_OF_EXTRINSIC_APOPTOTIC_SIGNALING_PATHWAY	YAP1;CSF2;AKT1;FGA;GDNF;GSK3B;GSTP1;HGF;ICAM1;IGF1;IL1A;IL1B;IL4;IL7;AR;ITGAV;LGALS3;NOS3;SERPINE1;PF4;RAF1;BCL2;RELA;BCL2L1;CX3CL1;SFRP2;BMP4;SNAI2;SRC;BRCA1;TERT;TGFBR1;THBS1;TNF;RNF34;PEA15;NRP1	22.3866	1.63e-32
GOBP_REGULATION_OF_CELLULAR_CATABOLIC_PROCESS	MIR543;BCL2L11;DNM1L;TOB1;NOD1;CEBPA;DEPP1;LRRK2;CNR1;MAPK14;ADRA1A;DAPK1;DCN;EGF;ELAVL1;AKT1;FOXO1;FOXO3;SIRT1;DAPK2;SH3BP4;MTOR;RNF19A;POLDIP2;PTPN22;GBA;GDNF;CCDC22;MYLIP;GSK3B;ANXA2;HGF;HIF1A;HMGB1;HP;APEX1;IFNG;IGF1;APOE;IL1B;IL4;IL6;IL10;INSR;KDR;LEP;LEPR;ARNT;MIRLET7B;MIR21;MDM2;MET;MLH1;ATM;NFE2L2;YBX1;PIK3CA;PIK3CB;PIK3CG;PLK1;TREM2;PPARA;PRKCA;MAPK3;MAPK8;PSEN1;PSMD10;PTEN;BAX;BCL2;ROCK…	5.0793	1.67e-32
GOBP_POSITIVE_REGULATION_OF_LYMPHOCYTE_DIFFERENTIATION	ADA;RASGRP1;LILRB2;FOXO3;GATA3;GLI3;ANXA1;HLA-DRB1;HLA-G;IFNG;IHH;IL2;IL2RA;IL4;IL7;IL7R;IL10;IL12B;IL12RB1;IL15;IL18;LGALS9;MIR21;MDK;MMP14;MYB;FOXP3;IL23A;AXL;PTPRC;ACTB;BCL6;CCL19;SMARCC1;BTK;XBP1;ARID1A;RUNX1;RUNX3;CD86;CD74	17.3349	2e-32
GOBP_NEGATIVE_REGULATION_OF_LEUKOCYTE_CELL_CELL_ADHESION	LILRB2;LILRB1;CTLA4;ERBB2;AKT1;PTPN22;TNFRSF21;GLI3;CD274;TBX21;ANXA1;HLA-DRB1;HLA-G;HMGB1;IHH;IL2;IL2RA;IL4;IL10;IDO1;ARG1;LGALS3;LGALS9;MIR141;MIR181C;MIR21;MIR31;MDK;FOXP3;PPARA;PTEN;BCL6;CCL21;CCL25;SDC4;CXCL12;WNK1;BMP4;CASP3;RUNX1;RUNX3;CD86;CD74	15.5747	2.16e-32
GOBP_RESPONSE_TO_INTERFERON_GAMMA	SIRPA;DAPK1;EDN1;AIF1;HCK;IFNG;IFNGR1;FASLG;IL12B;IL12RB1;JAK1;ARG1;LGALS9;MRC1;NOS2;PPARG;MED1;CXCL16;CCL1;CCL2;CCL5;CCL11;CCL14;CCL16;CCL17;CCL19;CCL21;CCL22;CCL25;CX3CL1;TDGF1;TLR2;TLR3;TLR4;TNF;TP53;VIM;NLRC5;CLDN1;CD47;CD74;CDC42	16.3057	2.56e-32
GOBP_REGULATION_OF_OSTEOBLAST_DIFFERENTIATION	TOB1;CDK6;YAP1;CEBPA;CTHRC1;CTNNB1;DDX5;FGF2;FGFR2;GREM1;GLI1;GLI3;HGF;IGF1;CCN1;IL6;ILK;AREG;LTF;MIR17;MIR20A;MIR200C;MIR21;MIR210;SMAD3;NOTCH1;WNT4;PPARG;RORB;SFRP1;SFRP2;BMP4;BMP7;BMPR1B;SNAI2;SOX9;TNF;TWIST1;VEGFC;ACVR2B;HAND2;RASSF2	16.1391	3.57e-32
GOBP_REGULATION_OF_REACTIVE_OXYGEN_SPECIES_METABOLIC_PROCESS	CDKN1A;MTCO2P12;CLCN3;CRP;MAPK14;CYP1B1;AKR1C1;AGT;AGTR1;F2;F2RL1;FOXM1;FOXO1;FOXO3;FPR2;GSTP1;HIF1A;HP;BIRC2;ITGAM;LEP;MIR21;MIR27B;MMP3;NFE2L2;PAX2;PDGFRB;PPARA;BCL2;BMP7;SOD1;SOD2;BRCA1;TGFB1;THBS1;TSPO;TLR4;TNF;TP53;TYROBP;AKR1C3;BECN1;CD36	15.2802	4.06e-32
GOBP_REGULATION_OF_MIRNA_METABOLIC_PROCESS	DDX5;EGR1;ETS1;FGF2;FOXO3;FOS;GATA2;GATA3;GATA6;NR3C1;HIF1A;IL10;JUN;SMAD3;SMAD4;MYB;MYC;NFKB1;NGFR;POU5F1;PPARA;PPARG;PRL;RELA;BMP4;SOX9;STAT3;TERT;TGFB1;TGFB2;TNF;TP53;WT1	29.363	5.64e-32
GOBP_NEGATIVE_REGULATION_OF_HYDROLASE_ACTIVITY	KLRC4-KLRK1;LRRK2;AGT;AHSG;AKT1;KLRK1;SH3BP4;GSK3B;ANXA1;ANXA2;HGF;NR4A1;BIRC2;BIRC3;BIRC5;APOA2;IL9;AQP1;USP17L2;KNG1;LEPR;LGALS3;LPA;LTF;MIRLET7B;MIR17;MIR195;MIR21;MIR29C;MMP9;NGF;NOS1;NOS3;SERPINE1;SERPINB2;PAX2;SERPINF1;SERPINA1;PTGS2;RAF1;RARRES1;ROCK1;SFRP2;WNK1;SLPI;SRC;TERF1;TGFB2;THBS1;TIMP1;TIMP2;TIMP3;TIMP4;SERPING1;TNF;C3;C5;VEGFA;VTN;RNF34;SERPINH1;CD44;HDAC9	7.83752	7.75e-32
GOBP_INTRINSIC_APOPTOTIC_SIGNALING_PATHWAY	BCL2L11;DNM1L;CDKN1A;LRRK2;PARP1;CYP1B1;DDX5;ENO1;EPO;AKT1;ERCC6;SIRT1;DAPK2;MSH6;HDAC1;HIF1A;MIR132;MIR17;MIR21;MIR27B;MDM2;MIF;MLH1;MMP9;MSH2;MUC1;MYC;ATM;NFE2L2;PIK3CB;TREM2;ACKR3;PTGS2;BAX;BCL2;BCL2L1;CXCL12;SFRP2;SNAI2;SNAI1;SOD1;SOD2;SRC;BRCA1;BRCA2;TNF;TNFRSF1A;TNFRSF1B;TP53;TPT1;XBP1;BAG6;CASP3;BECN1;CREB3L1;CD44;CD74	8.99681	1.11e-31
GOBP_POSITIVE_REGULATION_OF_PRODUCTION_OF_MOLECULAR_MEDIATOR_OF_IMMUNE_RESPONSE	NOD1;CD226;LILRB1;PHB2;CD55;EPHB2;F2RL1;SIRT1;PTPN22;GATA3;TBX21;HK1;HLA-G;IL1B;IL1R1;IL2;IL4;IL6;IL10;IL13;IL17A;IL18;KIR2DL4;MIF;MLH1;MSH2;B2M;PTPRC;IL21;STAT6;BTK;TGFB1;TLR3;TLR4;XBP1;IL18R1;BCL10;IL33;CD86;CD36;CD74	16.4118	1.11e-31
GOBP_REGULATION_OF_MUSCLE_CELL_DIFFERENTIATION	MAPK14;CTH;DNMT1;EDN1;EZH2;FGF9;FGFR2;DKK1;SIRT1;MTOR;FOXP1;PDCD4;GPER1;HDAC1;ID2;IGF1;LAMB1;MIR100;MIR145;MIR200B;MIR204;MIR21;MIR22;MIR34A;SMAD4;MDM2;MECP2;MMP14;NOTCH1;YBX1;PPARA;PTBP1;BCL2;RGS4;BDNF;BMP4;SOD2;ZEB1;TGFB1;XBP1;FZD7;HDAC3;WNT3A;HDAC9	14.0568	1.39e-31
GOBP_POSITIVE_REGULATION_OF_ADAPTIVE_IMMUNE_RESPONSE	ADA;CD226;CD55;SIRT1;GATA3;CD274;TBX21;HLA-B;HLA-DRB1;HLA-G;HSPD1;IL1B;IL1R1;IL2;IL4;IL6;IL12B;IL12RB1;IL18;LTA;MIR21;MLH1;MSH2;FOXP3;IL23A;TREM2;B2M;PTPRC;PVR;STAT6;BTK;TGFB1;TNF;C3;CCR2;TYK2;ZP3;SKAP1;IL18R1	18.0882	1.77e-31
GOBP_NEGATIVE_REGULATION_OF_NEURON_APOPTOTIC_PROCESS	PPARGC1A;CX3CR1;F2R;PLXND1;GBA;GDNF;ANGPT1;HIF1A;APOE;IL10;JUN;KDR;KRAS;MIR181C;MDK;MECP2;MSH2;NGF;NTF3;NTF4;NTRK2;PIK3CA;PPT1;AXL;PSEN1;BAX;RASA1;CCND1;BCL2;BCL2L1;ROCK1;BDNF;CCL2;CX3CL1;SLC1A1;SOD1;SOD2;BRAF;TERT;TGFB3;NDNF;NRP1;SEMA3E	14.5913	1.89e-31
GOBP_POSITIVE_REGULATION_OF_PROTEOLYSIS	PDCD6;BCL2L11;NOD1;CEBPA;LRRK2;CLDN4;CLDN3;CCN2;DAPK1;EGF;ENO1;AKT1;F2R;F3;FBLN1;FN1;SIRT1;RNF19A;GBA;GPER1;CCDC22;GSK3B;ANXA2;HDAC2;HMGB1;HSPD1;IFNG;APOE;CCN1;FAS;IL1B;FASLG;LGALS9;LYN;MIR17;MIR205;MIR21;MIR27B;SMAD3;MDM2;MMP14;MYC;NFE2L2;NGFR;PLK1;TREM2;PPARG;PSEN1;PSMD10;PTEN;BAX;SFRP2;SLC1A1;SRC;STAT3;TNF;TNFRSF1B;BAG6;AXIN1;TNFSF10;BCL10;WNT3A;IL33	7.68642	2.02e-31
GOBP_POSITIVE_REGULATION_OF_T_CELL_PROLIFERATION	LILRB2;CD55;AIF1;EPO;PTPN22;CD274;ANXA1;HLA-DPB1;HMGB1;IGF1;IL1A;IL1B;IL2;IL2RA;IL4;IL6;IL12B;IL12RB1;IL15;IL18;LEP;LGALS9;MIR21;KITLG;FOXP3;IL23A;PTPRC;IL21;CCL5;CCL19;CCR2;TYK2;VCAM1;ZP3;CARD11;CD86;CD40LG	20.4092	2.06e-31
GOBP_RESPONSE_TO_ETHANOL	CNR1;CLDN3;CLDN7;CRHR1;CSF3;DNMT3A;DRD2;FGFR2;FOS;GATA3;MSTN;GNRH1;HDAC2;HPGD;BIRC2;IGF1R;IL2;IL13;LEP;MAOB;NTRK3;OGG1;OPRM1;PPARA;UGT1A1;CCND1;RGS4;SLC2A4;SOD1;SOD2;TACR1;CLDN5;TNF;VCAM1;NR0B2;CAT;CLDN1;CD14;ADIPOQ;CDK1	16.8974	2.44e-31
GOBP_REGULATION_OF_EPITHELIAL_CELL_DIFFERENTIATION	CDKN1B;YAP1;FST;CTNNB1;EZH2;FGF2;PLCB1;GATA3;GDNF;IFNG;IL1A;IL1B;IL13;KRAS;HES5;LIF;MIR200C;MIR21;MIR34A;MMP9;NOTCH1;NOTCH4;SERPINE1;PAX2;ERRFI1;MED1;PRLR;CCND1;ROCK1;BMP4;BMP7;SOX9;ZEB1;BTG1;CLDN5;TNF;TNFRSF1A;VDR;VEGFA;ZFP36;PAX8;PROM1;S1PR2;GDF3	13.8223	2.46e-31
GOBP_CYTOKINE_PRODUCTION_INVOLVED_IN_IMMUNE_RESPONSE	NOD1;CD226;LILRB1;CD55;F2RL1;SIRT1;GATA3;ANGPT1;TBX21;HK1;HLA-G;APOA2;IL1B;IL1R1;IL4;IL6;IL10;IL18;KIR2DL4;ARG1;MIF;FOXP3;AXL;B2M;BCL6;BTK;TGFB1;TGFB2;TGFB3;TLR3;TLR4;TNF;TNFRSF1B;TWIST1;CCR2;IL18R1;BCL10;CD36;CD74	17.8673	2.55e-31
GOBP_ALPHA_BETA_T_CELL_ACTIVATION	ADA;LILRB1;CD55;IL27;MTOR;PTPN22;GATA3;FOXP1;GLI3;CD274;TBX21;ANXA1;HLA-DRB1;HMGB1;IFNG;IHH;IL2;IL2RA;IL4;IL6;IL12B;IL12RB1;IL15;IL18;LGALS9;MIR21;MYB;FOXP3;IL23A;PTGER4;PTPRC;IL21;BCL2;BCL6;CCL19;BRAF;STAT3;STAT6;CCR2;TYK2;CARD11;RUNX1;RUNX3;IL18R1;CD86	13.16	2.95e-31
GOBP_ORGANIC_HYDROXY_COMPOUND_TRANSPORT	ABCC4;CETP;CFTR;LILRB1;CNR1;CRH;CRHR1;ADRA2B;TTC39B;CYP19A1;AKR1C1;DRD2;AGT;AGTR1;EGF;SIRT1;GDNF;ANXA2;APOA2;APOE;AQP1;AQP2;AQP9;ITGB3;KCNQ1;LEP;LIPC;MIR148A;MIR17;MIR27B;MIR33A;MAOB;MECP2;NFKB1;NFKBIA;NOS1;OXTR;TREM2;PON1;PPARG;REN;ACTB;RXRA;CXCL12;SLC6A4;SNCG;SPP1;STAR;SYT1;MIR33B;TSPO;VIP;NR0B2;ADIPOQ;LIPG;CD36	9.01909	3.28e-31
GOBP_VASCULAR_PROCESS_IN_CIRCULATORY_SYSTEM	ABCC9;ABCC4;UTS2;CHRM3;ADM;CRP;ADRA1A;ADRA2B;ACE;AGT;AGTR1;AGTR2;EDN1;EDNRA;F2R;F2RL1;FGA;SLC7A8;ANGPT1;GPER1;APOE;CXCR2;INSR;KNG1;LEP;LEPR;MIR21;MMP2;NOS1;NOS3;OXTR;PTGS2;ACTA2;ROCK1;SLC1A1;SLC2A1;SLC2A3;SLC2A4;SLC6A4;SOD1;SOD2;SRC;TACR1;TEK;TGFB1;CLDN5;TNF;UCN;VEGFA;CALCA;SLC38A1;CASR;SLIT2;CD36	9.53131	3.44e-31
GOBP_NEGATIVE_REGULATION_OF_HEMOPOIESIS	CDK6;CEBPA;LILRB1;CTLA4;CTNNB1;ERBB2;FBN1;GATA2;GLI3;TBX21;ANXA1;HLA-G;HMGB1;IAPP;ID2;IHH;IL2;IL4;INHA;INHBA;LTF;LYN;MIR21;MDK;MYC;TNFRSF11B;FOXP3;IL17D;BCL6;SFRP1;BMP4;SNAI2;TLR3;TLR4;RUNX1;RUNX3;ADIPOQ;CD74	18.7687	3.54e-31
GOBP_SMALL_MOLECULE_BIOSYNTHETIC_PROCESS	ADA;CFTR;PPARGC1A;CYP2R1;ADM;CRABP2;CTH;CYP1A1;CYP1A2;CYP3A4;CYP19A1;EDN1;EGR1;FGF1;FGF2;FOXO1;AKR1B1;SIRT1;ALOX15;FSHB;GATM;GBA;HPGDS;GPER1;GPX4;NR3C1;GSTM1;GSTM2;GSTP1;ANXA1;ACACA;HPRT1;HSD17B1;HSD17B3;IFNG;APOE;IL1B;IMPA2;IDO1;LBR;LEP;LEPR;LHB;LHCGR;LIPC;MIR132;MIR204;MIR30C1;MIR33A;MAS1;MIF;MPO;MST1;NFKB1;NT5E;P2RY6;HSD17B7;WNT4;PPARA;PTGS2;RBP1;SRR;SNAI2;SNAI1;SOD1;SRD5A2;BRCA1;STAR;TNF;XBP1…	5.918	3.57e-31
GOBP_NEGATIVE_REGULATION_OF_LYMPHOCYTE_ACTIVATION	LILRB2;LILRB1;CTLA4;ERBB2;PTPN22;TNFRSF21;GLI3;CD274;TBX21;ANXA1;HLA-DRB1;HLA-G;HMGB1;ID2;IHH;IL2;IL2RA;IL4;IL10;IDO1;INHA;INHBA;ARG1;LGALS3;LGALS9;LYN;MIR181C;MIR21;MDK;ATM;FOXP3;AXL;PTEN;BCL6;SDC4;SFRP1;BMP4;BTK;TYROBP;CASP3;RUNX1;RUNX3;CD86;CD74	13.5954	4.35e-31
GOBP_METAL_ION_HOMEOSTASIS	ABCB6;CCR1;CCR5;CCR7;ADM;ACE;DRD2;AGT;AGTR1;EDN1;EDNRA;F2;F2R;FGF2;SLC7A8;GPER1;CCDC22;GSTM2;SLC40A1;HIF1A;IFNG;APOE;IL1A;FASLG;IL13;CXCL10;ITGB3;KCNQ1;KDR;LHCGR;LTF;LYN;MIR210;SMAD4;CXCL9;MYC;NOS1;NT5E;P2RY6;PIK3CB;RMDN3;PRKCB;ANKH;PSEN1;B2M;PTPRC;BAX;BCL2;CCL1;CCL5;CCL11;CCL14;CCL19;CCL21;CX3CL1;CXCL12;SLC1A1;WNK1;SOD1;SOD2;STC1;TACR1;THY1;TPT1;TRPC6;CCR2;VDR;TRPV1;CALCA;CASR;STC2;HYAL2;CD19	6.27322	4.4e-31
GOBP_POST_TRANSCRIPTIONAL_REGULATION_OF_GENE_EXPRESSION	MIR543;MIR1185-1;TOB1;EIF1;ADAR;KHDRBS1;MAPK14;CYP1B1;DAPK1;ACE;DDX5;DIO2;EGFR;EIF4EBP1;ELAVL1;ERBB2;AKT1;ESR1;FOXO3;DICER1;MTOR;GDNF;ANG;APEX1;IL6;EIF3E;ITGA2;MIRLET7B;MIRLET7D;MIR100;MIR10B;MIR122;MIR126;MIR132;MIR139;MIR141;MIR142;MIR143;MIR145;MIR148A;MIR154;MIR17;MIR181C;MIR183;MIR191;MIR195;MIR196A2;MIR20A;MIR200A;MIR200B;MIR200C;MIR204;MIR205;MIR21;MIR210;MIR214;MIR216A;MIR22;MIR23B;MIR27B…	4.28886	4.94e-31
GOBP_REGULATION_OF_METAL_ION_TRANSPORT	ABCC9;LILRB2;LILRB1;FCRL3;CCR1;CRHR1;CTNNB1;ACE;DPP6;DRD2;AGT;EGF;EPO;AKT1;F2;F2R;NEDD4L;GPER1;REM1;GSTM2;IFNG;IL13;IL16;CXCL10;ITGB1;ITGB3;KCNQ1;LGALS3;LHCGR;LYN;MIR200C;MIR21;MIR210;MIR34A;CXCL9;NOS1;NOS3;P2RX3;P2RX5;P2RY6;PDGFRB;PIK3CG;TREM2;B2M;PTGS2;BAX;BCL2;RGS4;CCL2;CCL5;CX3CL1;CXCL12;WNK1;STC1;TSPO;THY1;TRPC6;UCN;UTRN;VIP;CXCR4;ACTN4;CASR;STC2;CD19;MS4A1	7.09005	5.05e-31
GOBP_POSITIVE_REGULATION_OF_PROTEIN_LOCALIZATION	DNM1L;YAP1;CIB1;AGR2;CFTR;UCN3;PARP1;MAPK14;EGF;EGFR;EPHA3;EPHB2;ERBB2;AKT1;F2;F2RL1;FGA;NUP62;ANKRD1;GLI3;ANG;GPER1;GSK3B;HIF1A;HLA-DRB1;IFNG;IGF1;IL1A;IL1B;IL13;ITGAM;ITGB1;RHOG;LEP;LGALS3;LIF;SMAD3;NGFR;PLK1;TREM2;PPARG;VPS11;MAPK8;PSEN1;PSMD9;PTGS2;SRC;TERT;TGFB1;TGFB2;TGFB3;TLR2;TLR4;TNF;TRH;TYROBP;VEGFC;EZR;WNT7A;NR0B2;CASR;IRS2;HYAL2;HDAC3;SQSTM1;WNT3A;CDK1;CDH1	6.81665	5.38e-31
GOBP_EPITHELIAL_CELL_DEVELOPMENT	CDK6;YAP1;CEBPA;HPSE;CLDN3;EDNRA;AKT1;ESR1;F2RL1;AKR1B1;PLCB1;GATA2;GSK3B;HIF1A;HOXA13;ICAM1;IHH;IL1A;IL1B;AR;KDR;MET;NOTCH1;NOTCH4;FOXP3;PGR;ROBO4;ACTA2;RARB;ROCK1;ROS1;SDC1;BMP4;SOX9;SRC;STC1;CLDN5;TNF;TNFRSF1A;VEGFA;EZR;VIM;WNT7A;CXCR4;COL18A1;CLDN1;S1PR2;ADIPOQ;CLOCK	10.9655	7.9e-31
GOBP_REGULATION_OF_CYTOSKELETON_ORGANIZATION	CDKN1B;CIB1;AKAP13;CCR7;CRK;CSF1R;CSF3;CCN2;S1PR1;EDN1;EPHA3;F2RL1;FKBP4;NUP62;ALOX15;MTOR;LMOD1;GSK3B;TMOD3;HCK;IL1A;ITGB3;RHOC;RHOG;STMN1;LIMK1;MIR20A;MIR21;MIR214;TACSTD2;SMAD3;SMAD4;MAP2;MDK;MECP2;MET;NTF3;NTRK3;PAK1;PDGFA;PDGFRA;PDGFRB;PIK3CA;PLK1;WNT4;RHOF;MAPK1;MAPK3;PTGER4;RASA1;RGS4;AFAP1;ROCK1;CCL11;CCL21;CX3CL1;SDC4;CXCL12;SFRP1;FSCN1;BRCA1;BRAF;TACR1;TEK;TGFB3;TGFBR1;EZR;ARHGAP28;NRP1…	6.10275	8.39e-31
GOBP_REGULATION_OF_REPRODUCTIVE_PROCESS	ADA;CDKN1B;CIB1;CNR1;CTNNB1;DUSP1;ESR1;FGF9;PLCB1;NR5A1;AMH;GJA1;HPGDS;GNRH1;HDAC2;IGF1;RBPJ;IL1A;INHBA;INSR;AR;ITGB3;USP17L2;LIF;NOTCH1;OXTR;PAEP;SERPINF1;WNT4;PPP2R1A;RETN;BAX;BCL2L1;SFRP1;BMP4;BMP7;SNAI1;SOD1;SOX9;SRC;SRY;TACR1;TIMP1;VEGFA;VIP;WT1;ZP3;ACVR1B	11.3426	8.72e-31
GOBP_TRANSMEMBRANE_TRANSPORT	ABCB6;ABCC9;ABCC4;MTCO2P12;CFTR;HPSE;SCN11A;CHRM3;PHB2;CLCN3;ANO4;CCR5;CCR7;SLCO6A1;CLDN4;CRH;CRHR1;MAPK14;ADRA1A;CCN2;CNIH3;CYB5A;DAPK1;ACE;DPP6;DRD2;AGT;EDN1;EDNRA;EPHB2;EPO;AKT1;F2;F2R;FGF2;NEDD4L;SLC7A8;GC;GH1;GJA1;GJB2;GPER1;REM1;GSTM2;SLC40A1;ANXA2;HSPD1;IFNG;IGF1;IL1B;FASLG;AQP1;AQP2;IL13;AQP5;CXCL10;INSR;AQP9;ITGAV;ITGB1;ITGB3;KCNQ1;KCNQ2;ARG1;LEP;LHCGR;LYN;MIR143;MIR200C;MIR21;MIR210;MIR…	3.59638	9.91e-31
GOBP_REGULATION_OF_CELL_MATRIX_ADHESION	CDK6;CDKN2A;CIB1;CCR7;CSF1;EPHA3;POLDIP2;GREM1;GSK3B;ITGB3;KDR;MIR29C;SMAD3;MMP12;MMP14;SERPINE1;PIK3CB;PLAU;WNT4;PTEN;RASA1;BCL2;BCL6;ROCK1;CCL21;CCL25;CX3CL1;SDC4;SFRP1;SRC;TEK;THBS1;THY1;UTRN;VEGFA;SKAP1;NRP1;CD36;SEMA3E	17.0355	1.05e-30
GOBP_POSITIVE_REGULATION_OF_CELL_SUBSTRATE_ADHESION	CDK6;CIB1;AGR2;OLFM4;CCR7;CRK;CSF1;CCDC80;FGA;FN1;ALOX15;ABI3BP;POLDIP2;GSK3B;CCN1;ILK;ITGA5;ITGB3;KDR;SMAD3;MDK;WNT4;ROCK1;CCL21;CCL25;CX3CL1;SDC4;SFRP1;BRAF;TEK;THY1;UTRN;VEGFA;VTN;NDNF;SKAP1;NRP1;CD36;CDC42	17.0355	1.05e-30
GOBP_REGULATION_OF_DNA_METABOLIC_PROCESS	CDKN1A;PPARGC1A;BRD8;PARP1;CTNNB1;CYP1B1;EGF;EGFR;ERCC1;ERCC2;AKT1;ERCC6;FGF2;FOXM1;SIRT1;GATA3;GREM1;ANKRD1;GLI1;MSH6;DNMT3L;TBX21;H2AX;HGF;HMGB1;IGF1R;IL2;IL4;IL6;IL7R;IL10;MIR29C;MAS1;MECP2;MLH1;MSH2;MYC;ATM;OGG1;FOXP3;PCNA;PDGFA;PDGFRB;PIK3CA;PPP2R1A;MAPK1;MAPK3;MAP2K7;PTPRC;BAX;ACTB;BCL6;SMOC2;SMARCC1;SRC;BRCA1;BRCA2;STAT6;TERF1;TFDP1;TGFB1;TNF;TP53;TWIST1;UCN;WT1;XRCC1;STN1;HMGA2;ARID1A;BCA…	6.07638	1.07e-30
GOBP_CARTILAGE_DEVELOPMENT	OSR2;COL1A1;MAPK14;CCN2;CTNNB1;EDN1;FGF2;FGF9;GREM1;GLI3;HIF1A;HOXA11;CCN1;IHH;ITGB8;HES5;LEP;MIR21;SMAD3;MDK;MMP13;MAPK3;SULF2;RARB;RB1;SFRP2;BMP4;BMP7;BMPR1B;SNAI2;SNAI1;SOX9;STC1;ZEB1;TGFB1;TGFBI;TGFBR1;THRA;TIMP1;WNT7A;HMGA2;RUNX1;RUNX3;HYAL2;SERPINH1;HAND2;CD44	11.6803	1.17e-30
GOBP_VASCULAR_ASSOCIATED_SMOOTH_MUSCLE_CELL_PROLIFERATION	CDKN1A;CDKN1B;DNMT1;AGT;EDN1;FGF2;FGF9;POLDIP2;GJA1;PDCD4;GPER1;HPGD;IGF1;IL10;JUN;MIR17;MIR20A;MIR21;MIR214;MIR27B;MIR34A;MMP2;MMP9;MIR135B;P2RY6;PPARG;PTEN;MIR503;SOD2;SRC;TERT;TGFB3;TNF;S1PR2;ADIPOQ	21.8445	1.42e-30
GOBP_B_CELL_DIFFERENTIATION	ADA;FCRL3;DOCK11;EZH2;ID2;IFNA1;IFNA13;RBPJ;IL2;IL4;IL6;IL7;IL9;IL10;IL11;INHA;INHBA;ITGB1;LGALS1;MMP14;MSH2;ATM;PIK3CD;PTPRC;BAX;IL21;BCL2;BCL6;SFRP1;DCLRE1C;ADAM17;TCF3;BTK;TP53;VCAM1;XBP1;CARD11;CD19;MS4A1;CD40LG;CD79A;HDAC9	14.3698	1.52e-30
GOBP_T_CELL_ACTIVATION_INVOLVED_IN_IMMUNE_RESPONSE	LILRB1;F2RL1;IL27;MTOR;GATA3;FOXP1;TBX21;ANXA1;HLA-DRB1;HMGB1;ICAM1;IFNA1;IFNA13;IFNG;IL2;IL4;IL6;IL12B;IL12RB1;IL18;LGALS3;LGALS9;MIR21;MDK;MYB;FOXP3;IL23A;PSEN1;PTGER4;IL21;BCL6;CCL19;STAT3;STAT6;TP53;IL18R1;CD86;CD74	17.8294	1.55e-30
GOBP_INTERLEUKIN_12_PRODUCTION	LILRB1;CCR7;MAPK14;PLCB1;FOXP1;HLA-B;HLA-G;HMGB1;HSPD1;IFNG;IL10;IL12B;IL16;IL17A;IDO1;LEP;LGALS9;MIR21;MDK;NFKB1;IL23A;RELA;CCL19;THBS1;TLR2;TLR3;TLR4;CD36;CD40LG;CD47	33.9072	1.7e-30
GOBP_MAINTENANCE_OF_CELL_NUMBER	YAP1;MMP24;CTNNB1;ELAVL1;ESRRB;EZH2;FANCD2;ZHX2;FOXO1;FOXO3;GATA2;HDAC1;HDAC2;IGF1;RBPJ;HES5;LIF;MIR145;MYC;NOTCH1;PAX2;POU5F1;SALL4;PTN;RAF1;ACTB;SFRP1;BMP7;SMARCC1;SOX2;SOX9;BRAF;STAT3;HNF1B;KLF10;TPT1;WNT7A;PAX8;NANOG;TET1;HMGA2;ARID1A;FZD7;MED14;MED17	12.4767	1.9e-30
GOBP_POSITIVE_REGULATION_OF_MAP_KINASE_ACTIVITY	RASGRP1;AKAP13;LRRK2;CSK;IL34;EDN1;EGF;EGFR;ERBB2;EZH2;FGF1;FGF2;DKK1;FLT1;GH1;IL1B;INSR;KITLG;MIF;MST1R;NTF3;NTRK3;PAK1;PDGFA;PDGFRB;PIK3CG;MAP2K7;PSEN1;PTPRC;CCL19;SRC;TDGF1;TGFB1;THBS1;TLR4;TNF;VEGFA;AXIN1	17.609	2.22e-30
GOBP_REGULATION_OF_MUSCLE_SYSTEM_PROCESS	ADA;MYL9;CHRM3;PARP1;ADRA1A;CCN2;ADRA2B;AGT;EDN1;AIF1;ENO1;F2R;FOXO1;FOXO3;MSTN;FOXP1;GPER1;GSTM2;NR4A1;IGF1;ITGA2;KCNQ1;MIR143;MIR145;MIR17;MIR20A;MIR200C;MIR21;MIR214;SMAD3;SMAD4;NOS1;NOS3;NOTCH1;OXTR;PIK3CG;ERRFI1;PPARA;PPARG;PRKCA;PTGS2;RGS4;ROCK1;SOD1;STC1;TACR1;TNFRSF1A;TNFRSF1B;UCN;CALCA;BECN1;HAND2	9.65999	2.41e-30
GOBP_POSITIVE_REGULATION_OF_MYELOID_CELL_DIFFERENTIATION	CCR1;CREB1;MAPK14;CSF1;CSF3;IL34;ETS1;FOXO3;FOS;GATA2;HIF1A;HLA-DRB1;ID2;IFNG;IL12B;IL17A;INHBA;LIF;ARNT;MIR145;KITLG;IL23A;PF4;TREM2;MED1;PRKCA;RB1;STAT3;TGFB1;KLF10;TNF;TYROBP;DCSTAMP;RUNX1;ACVR1B;CD74	19.8402	2.8e-30
GOBP_SEXUAL_REPRODUCTION	BCL2L11;FST;CIB1;KHDRBS1;CFTR;LRRK2;CNR1;CTNNB1;ACE;DNMT3A;EDN1;EDNRA;ERCC1;AKT1;FANCD2;FOXO3;PLCB1;SIRT1;CADM1;MTOR;FSHB;FSHR;GALNT3;NECTIN3;AMH;GJA1;HPGDS;GLI1;ANG;ANGPT2;GPX4;MSH6;DNMT3L;H2AX;HOXA10;HOXA11;HPGD;BIRC3;IGF1;IHH;IL1A;IL12B;INHBA;AR;ITGB1;LEP;LEPR;LHCGR;SMAD4;MAS1;MDK;MLH1;MMP2;MSH2;MST1R;ATM;NOS3;NOTCH1;CLDN11;PAEP;PGR;PLK1;WNT4;PPP2R1A;AXL;PTGS2;PTN;BAX;RB1;BCL2;BCL2L1;BCL6;BRD2…	4.61048	3.07e-30
GOBP_CELL_SURFACE_RECEPTOR_SIGNALING_PATHWAY_INVOLVED_IN_CELL_CELL_SIGNALING	CDH3;YAP1;CTHRC1;LRRK2;COL1A1;MAPK14;CTNNB1;DLX3;DLX5;DRD2;EDN1;EDNRA;EGF;EGFR;EGR1;AKT1;FGF2;FGF9;FGFR2;DKK1;FOXO1;FOXO3;GATA3;GREM1;RBMS3;GLI1;GLI3;GSK3B;HDAC1;APOE;IGFBP1;IGFBP6;RBPJ;ILK;ITGAM;MIR145;MIR29C;SMAD3;MDK;MECP2;NFKB1;NOTCH1;OPRM1;P2RX3;P2RX5;WNT4;PPP2R1A;SULF2;PSEN1;PTEN;CCND1;RGS4;SDC1;SFRP1;SFRP2;WNK1;BMP4;SNAI2;SOX2;SOX9;SRC;HNF1B;TERT;TGFB1;TGFB1I1;TLR2;C3;TRPV1;WNT7A;AXIN1;FZD…	5.77756	3.35e-30
GOBP_MIRNA_METABOLIC_PROCESS	DDX5;EGR1;ETS1;FGF2;FOXO3;DICER1;FOS;GATA2;GATA3;GATA6;NR3C1;HIF1A;IL10;JUN;SMAD3;SMAD4;MYB;MYC;NFKB1;NGFR;POU5F1;PPARA;PPARG;PRL;RELA;BMP4;SOX9;STAT3;TERT;TGFB1;TGFB2;TNF;TP53;WT1	22.7177	3.57e-30
GOBP_SYNAPTIC_SIGNALING	LILRB2;UTS2;PRRT2;CHRM3;CLCN3;LRRK2;CNR1;CRH;CRHR2;ADRA1A;CTNNB1;CX3CR1;ACE;DRD2;AGT;EDN1;EPHB2;AKT1;EZH2;F2R;DKK1;PLCB1;LPAR3;RNF19A;GDNF;GPER1;GSK3B;NR4A1;APOE;IL1B;IL1RAP;ITGB1;KCNQ2;KISS1;KRAS;MIR142;MECP2;MME;MIR342;NGF;NOS1;NTF3;NTF4;NTRK2;OPRM1;OXTR;P2RX3;P2RX5;PLG;PPT1;PRKCB;MAPK1;PSEN1;RETN;PTEN;PTGS2;PTN;PTPRD;RELA;RGS4;BDNF;S100B;CCL2;CX3CL1;SLC1A1;SLC6A4;SNCG;SRC;BRAF;SST;SYP;SYT1;TAC…	4.99536	4.02e-30
GOBP_REGULATION_OF_OSSIFICATION	OSR2;CCR1;MAPK14;CSF1;S1PR1;AHSG;DKK1;GREM1;INTU;HIF1A;CCN1;RBPJ;LTF;SMAD3;MDK;NOTCH1;ENPP1;WNT4;MAPK1;MAPK3;ANKH;PTGER4;PTN;BCL2;RXRA;SFRP1;BMP4;BMP7;BMPR1B;SOX9;TACR1;TGFB1;TGFB2;TGFB3;TWIST1;VDR;CALCA;ACVR2B	17.1843	4.5e-30
GOBP_REGULATION_OF_HORMONE_SECRETION	CFTR;UCN3;CNR1;CREB1;CRH;CRHR1;CYP19A1;DRD2;AGT;AGTR1;EDN1;FGA;FOXO1;GHRH;GHRHR;GJA1;GPER1;ANXA1;HIF1A;HLA-DRB1;FOXA2;IFNG;IL1B;IL6;IL11;INHA;INHBA;KISS1;LEP;LIF;SMAD4;NOS2;PPARG;RETN;PSMD9;REN;CCL5;SFRP1;SPP1;TACR1;TSPO;TNF;TRH;UCN;PAX8;NR0B2;CASR;IRS2;ADIPOQ;CLOCK	10.1224	4.8e-30
GOBP_STRIATED_MUSCLE_CELL_DIFFERENTIATION	MYL9;PDLIM5;AKAP13;MAPK14;ADRA1A;AGT;EDN1;AKT1;EZH2;DKK1;MTOR;LMOD1;GATA6;GREM1;ANKRD1;FOXP1;TMOD3;HDAC1;ERVW-1;IGF1;RBPJ;IL4;CXCL10;ITGB1;KRAS;MIR195;MIR200B;MIR204;SMAD4;CXCL9;MMP14;NOS1;NOTCH1;YBX1;PDGFRA;PDGFRB;PPARA;RARB;RB1;BCL2;RGS4;BDNF;SDC1;BMP4;TGFB1;VEGFA;WT1;XBP1;FZD7;CASP3;HDAC3;WNT3A;SCGB3A1;HDAC9;CDK1	8.70178	5.1e-30
GOBP_CELLULAR_RESPONSE_TO_EXTRACELLULAR_STIMULUS	CDKN1A;POSTN;UCN3;LRRK2;COL1A1;COMT;AIF1;ERCC6;ALB;FOXO1;FOXO3;SIRT1;FOS;MTOR;GBA;FOXA2;IGF1R;FAS;AQP2;IL15;LEP;LYN;NFE2L2;WNT4;KRT20;PPARA;MED1;AXL;MAPK1;MAPK3;MAPK8;PTPRC;BCL2;RXRA;SFRP1;SFRP2;SLC2A1;SNAI2;SRD5A1;KLF10;TP53;USF2;VCAM1;VDR;XBP1;MAP1LC3B;CASR;AKR1C3;NCOA1;BECN1;UCN2;CD68	9.47571	5.34e-30
GOBP_NEGATIVE_REGULATION_OF_GROWTH	CDKN1A;CDKN1B;CDKN2A;SEMA3C;AGT;AGTR2;ENO1;ESR2;SIRT1;SH3BP4;GREM1;MSTN;GJA1;FOXP1;HIF1A;INHBA;MIR200B;SMAD3;SMAD4;MAP2;ENPP1;PPARA;PPP2R1A;PPT1;PTEN;SEMA6A;RB1;BCL2;RGS4;BCL6;SFRP1;SFRP2;BMP4;SLC6A4;SLIT3;SPP1;BTG1;TGFB1;TGFB2;TP53;WT1;DCSTAMP;STC2;HYAL2;NRP1;WNT3A;ACVR1B;SCGB3A1;SLIT2;SEMA3E;CDH1	9.7545	5.73e-30
GOBP_SUPRAMOLECULAR_FIBER_ORGANIZATION	CDKN1B;MYL9;CIB1;CFL1;AKAP13;CCR7;COL1A1;CSF3;CCN2;CYP1B1;S1PR1;EDN1;AIF1;F2RL1;FKBP4;ALOX15;MTOR;LMOD1;GREM1;ANKRD1;ANG;TMOD3;ANXA2;HCK;IAPP;APOE;ITGB1;RHOC;RHOG;STMN1;LIMK1;LOX;LOXL1;MIR20A;MIR21;MIR214;TACSTD2;MIR31;SMAD3;SMAD4;MAP2;MDM2;MECP2;MET;NEFM;PAK1;PDGFRA;PDGFRB;PIK3CA;TREM2;WNT4;KRT20;RHOF;PSEN1;B2M;PTGER4;BAX;RASA1;RB1;BCL2;RGS4;ROCK1;CCL11;CCL21;CX3CL1;SDC4;CXCL12;SFRP1;SFRP2;FSCN1…	4.80579	5.83e-30
GOBP_BIOLOGICAL_PROCESS_INVOLVED_IN_SYMBIOTIC_INTERACTION	CFL1;CCR5;CSF1R;CX3CR1;CD55;DPP4;AGTR1;EGFR;F2;F2RL1;FN1;HDAC1;HLA-DRB1;HMGB1;HSPD1;ICAM1;IFI27;IFIT1;APOE;CXCL8;INSR;ITGA2;ITGA5;ITGAV;ITGB1;ITGB3;JUN;ARG1;LGALS1;LGALS9;LTF;MBL2;MRC1;NCAM1;PF4;PLG;SLC52A1;AXL;ST6GALNAC1;PVR;NECTIN1;BCL2L1;CCL5;SRC;BSG;CXCR4;THOC6;HMGA2;NECTIN4;HYAL2;NRP1;CLDN1;CD86;CD74;CDK1;CDC42	8.44351	5.93e-30
GOBP_NEGATIVE_REGULATION_OF_CELL_DEVELOPMENT	SEMA3C;LILRB1;CTNNB1;EPHB2;F2;FBLN1;FBN1;KIFAP3;DICER1;GSK3B;IGF1;IL1A;IL1B;IL6;HES5;LTF;MIR181C;TACSTD2;MAP2;NOTCH1;NTRK3;PAEP;TREM2;PSEN1;B2M;PTEN;SEMA6A;PTN;RB1;CCL11;GORASP1;BMP7;SPP1;TSPO;THY1;TNF;TP53;VEGFA;TRPV1;WNT7A;ACTN4;NRP1;WNT3A;SEMA3E;CDH1	11.952	8.72e-30
GOBP_LEUKOCYTE_MEDIATED_CYTOTOXICITY	KLRC4-KLRK1;RASGRP1;CD226;LILRB1;CRK;CX3CR1;F2;F2RL1;FCGR3A;KLRK1;CADM1;NCR3;HLA-B;HLA-DRB1;HLA-G;HPRT1;ICAM1;IL7R;IL12B;IL12RB1;IL18;ITGAM;KIR2DL4;KIR3DL1;KLRC1;ARG1;LEP;LGALS9;SH2D1A;NOS2;IL23A;B2M;PTPRC;PVR;IL21;TYROBP;VAV1;ULBP3;ULBP2	15.5763	1.51e-29
GOBP_VIRAL_PROCESS	ADAR;CXCR6;CFL1;CCR5;CSF1R;CD55;DPP4;AGTR1;EGFR;NR5A2;GSK3B;HDAC1;HLA-DRB1;HMGB1;ICAM1;IFI27;IFIT1;APOE;CXCL8;INSR;ISG20;ITGA2;ITGA5;ITGAV;ITGB1;ITGB3;JUN;LGALS1;LGALS9;LTF;MIR141;MIR30C1;MBL2;MRC1;NCAM1;NOTCH1;VTA1;PPARA;SLC52A1;AXL;PTBP1;PVR;NECTIN1;BCL2;BCL2L1;CCL1;CCL2;CCL5;SLPI;BSG;TNF;TP53;USF2;ZFP36;CXCR4;HMGA2;NECTIN4;DENR;HYAL2;NRP1;CLDN1;CD86;CD74;CDK1	6.88264	1.64e-29
GOBP_REGULATION_OF_ACTIN_FILAMENT_BASED_PROCESS	AKAP13;CCR7;CRK;CSF1R;CSF3;CCN2;S1PR1;EDN1;EPHA3;F2RL1;ALOX15;MTOR;LMOD1;TMOD3;HCK;IL1A;ITGB3;RHOC;RHOG;STMN1;LIMK1;MIR20A;MIR21;MIR214;TACSTD2;SMAD3;SMAD4;MDK;MET;NTF3;NTRK3;PAK1;PDGFA;PDGFRA;PDGFRB;PIK3CA;WNT4;RHOF;PTGER4;ACTA2;RASA1;RGS4;ROCK1;CCL11;CCL21;CX3CL1;SDC4;CXCL12;SFRP1;FSCN1;BRAF;STC1;TACR1;TEK;TGFB3;TGFBR1;EZR;ARHGAP28;NRP1;SLIT2;CD47;SEMA3E;CDC42	7.00741	1.82e-29
GOBP_BIOMINERALIZATION	ADA;CFTR;OSR2;CCR1;COL1A1;S1PR1;AHSG;ERCC2;FGFR2;HEY1;ALOX15;GREM1;HIF1A;IGF1;CCN1;LEP;LOX;LTF;SMAD3;MMP13;NOS3;NOTCH1;NT5E;ENPP1;WNT4;PPARA;ANKH;PTGS2;PTN;NECTIN1;ROCK1;RXRA;BMP4;BMP7;SLC20A1;BMPR1B;SOX9;SPP1;TGFB1;TGFB3;KLF10;TWIST1;VDR;ACVR2B	12.1928	1.83e-29
GOBP_POSITIVE_REGULATION_OF_TUMOR_NECROSIS_FACTOR_SUPERFAMILY_CYTOKINE_PRODUCTION	RASGRP1;NOD1;LRRK2;EPHB2;FCGR3A;HDAC2;HMGB1;IFNG;IFNGR1;IL1A;IL6;IL12B;IL17A;LEP;LGALS9;MIR27B;MIF;IL23A;PF4;PSEN1;PTPRC;CCL19;STAT3;BTK;THBS1;TLR2;TLR3;TLR4;TWIST1;CCR2;TYROBP;BCL10;IL33;CD14;CD86;CD36	18.4801	1.91e-29
GOBP_LYMPHOCYTE_APOPTOTIC_PROCESS	ADA;BCL2L11;AKT1;KIFAP3;FOXP1;TNFRSF21;GLI3;CD274;HIF1A;FAS;IL2;IL2RA;FASLG;IL7R;IL10;IDO1;LGALS3;LGALS9;LYN;MIF;PDCD1;PTEN;BAX;BCL2;BCL6;CCL5;BMP4;BTK;TP53;IRS2;BCL10;CD74	24.8914	2e-29
GOBP_MONOCARBOXYLIC_ACID_METABOLIC_PROCESS	PPARGC1A;CNR1;CRABP2;MAPK14;CYP1A1;CYP1A2;CYP1B1;CYP2B6;CYP2C19;CYP3A4;CYP26A1;AKR1C1;AKR1C2;DECR1;EDN1;ENO1;AKT1;AKR1B1;FMO2;SIRT1;ALOX15;MTOR;NR5A2;GATM;HPGDS;GPX4;GSTM1;GSTM2;GSTP1;ANXA1;HIF1A;HK1;ACACA;HPGD;IFNG;IGF1;IL1B;IDO1;INSR;LEP;LIPC;ARNT;CYP4F3;MIR132;MIR204;MIR210;MIR30C1;MIR33A;MIF;UGT2B28;PPARA;UGT1A1;PPARG;PSEN1;PTGS2;RBP1;SRR;SOX9;BRCA1;STAR;STAT3;SULT2A1;TNFRSF1A;TP53;C3;TWIST1;…	5.51604	2.09e-29
GOBP_REGULATION_OF_PEPTIDYL_SERINE_PHOSPHORYLATION	CSF3;EGFR;AKT1;DKK1;ANGPT1;HGF;IFNA1;IFNA13;IFNG;IL6;IL11;LIF;MIR132;MIF;NGF;NOS1;NTF3;NTF4;NTRK2;NTRK3;PAK1;PIK3CA;PTEN;PTGS2;BAX;RAF1;BCL2;BDNF;SFRP2;BRAF;TGFB1;TNF;TXN;UCN;VEGFA;AXIN1;BCAR3;WNT3A;CD44;RASSF2	14.591	2.2e-29
GOBP_REGULATION_OF_BLOOD_PRESSURE	ABCC9;UTS2;CNR1;ADM;ADRA1A;ADRA2B;ACE;DRD2;AGT;AGTR1;AGTR2;EDN1;EDNRA;F2R;F2RL1;HSD11B2;ID2;AR;KCNQ1;LEP;MIR17;MIR27B;SMAD3;MECP2;NOS1;NOS2;NOS3;OXTR;PPARA;PPARG;PTGS2;ACTA2;REN;WNK1;SOD1;SOD2;BRS3;TACR1;NR2F2;TNF;UCN;VEGFC;TRPV1;CALCA;ADIPOQ	11.6235	2.33e-29
GOBP_REGULATION_OF_CALCIUM_ION_TRANSPORT	LILRB2;LILRB1;FCRL3;CCR1;CRHR1;CTNNB1;ACE;DRD2;AGT;EGF;EPO;F2;F2R;GPER1;REM1;GSTM2;IL13;IL16;CXCL10;ITGB3;LGALS3;LHCGR;LYN;MIR200C;MIR21;MIR34A;CXCL9;NOS1;NOS3;P2RX3;P2RX5;P2RY6;PDGFRB;PIK3CG;PTGS2;BAX;BCL2;RGS4;CCL2;CCL5;CX3CL1;CXCL12;STC1;TSPO;THY1;TRPC6;UCN;CXCR4;CASR;STC2;CD19;MS4A1	9.12147	2.51e-29
GOBP_CELLULAR_RESPONSE_TO_INTERLEUKIN_1	SIRPA;EDN1;EGR1;PLCB1;ANKRD1;HIF1A;IL1B;IL1R1;IL1RN;IL6;CXCL8;IL17A;MIR21;MMP2;NFKB1;MAPK3;MAP2K7;RELA;CCL1;CCL2;CCL5;CCL11;CCL14;CCL16;CCL17;CCL19;CCL21;CCL22;CCL25;CX3CL1;SFRP1;SOX9;IL1R2;HYAL2;USP10;CD47	18.2301	2.77e-29
GOBP_ENDOTHELIAL_CELL_APOPTOTIC_PROCESS	PAK4;FGA;FOXO3;GATA2;GATA3;PDCD4;ANGPT1;GPER1;HLA-G;ICAM1;FASLG;IL4;IL10;IL11;IL13;KDR;MIR126;MIR132;NFE2L2;MIR375;SERPINE1;CCL2;BRAF;TEK;TERT;THBS1;TNF;NDNF;AKR1C3;CD40LG	29.4277	3.11e-29
GOBP_MACROPHAGE_DIFFERENTIATION	CEBPA;PARP1;CSF1;CSF1R;CSF2;IL34;SIRT1;GATA2;GBA;HLA-DRB1;ID2;IFNG;IL15;INHA;INHBA;LIF;MIR145;MMP9;PF4;PRKCA;RB1;BMP4;TGFB1;TLR2;VEGFA;ADIPOQ;CDC42	41.8201	3.2e-29
GOBP_FORMATION_OF_PRIMARY_GERM_LAYER	CTNNB1;DUSP1;DUSP2;FGFR2;DKK1;FN1;GATA6;GJA1;HOXA11;INHBA;ITGA2;ITGA5;ITGAV;ITGB1;ITGB3;LAMB1;MIR145;MIR200C;SMAD2;SMAD3;MMP2;MMP9;MMP14;PAX2;POU5F1;MAP2K1;SFRP2;BMP4;BMP7;SNAI1;SOX2;HNF1B;VTN;NANOG;HMGA2;AXIN1;FZD7;WNT3A	16.017	3.44e-29
GOBP_ORGANIC_ACID_METABOLIC_PROCESS	PPARGC1A;CYP2R1;CNR1;CRABP2;MAPK14;CTH;CYP1A1;CYP1A2;CYP1B1;CYP2B6;CYP2C19;CYP3A4;CYP26A1;AKR1C1;AKR1C2;DECR1;SARDH;EDN1;ENO1;AKT1;AKR1B1;FMO2;SIRT1;ALOX15;MTOR;NR5A2;GATM;HPGDS;GPX4;GSTM1;GSTM2;GSTP1;ANXA1;HIF1A;HK1;ACACA;HPGD;IFNG;IGF1;IL1B;IDO1;INSR;ARG1;LEP;LIPC;ARNT;CYP4F3;MIR132;MIR204;MIR21;MIR210;MIR30C1;MIR33A;MECP2;MIF;MPO;NOS1;NOS2;NOS3;ENPP1;PON1;UGT2B28;PPARA;UGT1A1;PPARG;QRSL1;ANKH;…	4.36099	3.85e-29
GOBP_NIK_NF_KAPPAB_SIGNALING	NOD1;PHB2;CHUK;EDN1;EGFR;AKT1;DICER1;PTPN22;GREM1;PDCD4;BIRC2;BIRC3;IL1B;IL12B;IL18;ILK;LGALS9;MIR132;MIR204;MIR21;MIR27B;MIR30C2;MAS1;NR3C2;NFKBIA;IL23A;TREM2;RELA;CCL19;BMP7;TLR2;TLR3;TLR4;TNF;EZR;ACTN4;IL18R1;CD14;CD86;RASSF2	14.3133	4e-29
GOBP_CELL_CYCLE_PHASE_TRANSITION	CDK4;CDK6;CDKN1A;CDKN1B;CDKN2A;CDKN3;KHDRBS1;PHB2;CKS1B;MAPK14;CYP1A1;DUSP1;EGFR;EIF4EBP1;AIF1;ERCC2;AKT1;ERCC6;ESRRB;EZH2;FANCD2;FOXM1;PLCB1;GLI1;TMOD3;ANXA1;H2AX;APEX1;BIRC5;ID2;INHBA;ITGB1;USP17L2;MIR195;MIR214;MIR29C;MIR30C2;MDM2;MECP2;MNAT1;MSH2;MUC1;MYC;ATM;PLK1;POLE;PTEN;MIR451A;MIR503;PTPRC;RB1;CCND1;BCL2;ACTB;CCL2;SKP2;SMARCC1;SOX2;BRCA1;BRCA2;ADAM17;TERT;TFDP1;TP53;XRCC3;ARID1A;KLF11;CC…	5.67252	5.05e-29
GOBP_SENSORY_ORGAN_MORPHOGENESIS	TSHZ1;CTHRC1;OSR2;CTNNB1;DLX5;EDN1;EDNRA;EPHB2;FBN1;FGF2;FGF9;FGFR2;ZHX2;FJX1;NECTIN3;GATA2;GATA3;INTU;GLI3;HDAC1;HDAC2;HIF1A;IHH;FASLG;AQP1;AQP5;KCNQ1;KDR;NOTCH1;NTRK2;PAX2;MAPK1;MAPK3;BAX;NECTIN1;RARB;BCL2;RORB;SLC1A1;BMP4;BMP7;SOD1;SOX9;STAT3;ZEB1;THY1;TWIST1;VEGFA;PAX8;BCAR3;PROM1;WNT3A	8.95482	5.32e-29
GOBP_NEGATIVE_REGULATION_OF_SECRETION	ADA;LILRB1;CNR1;CRH;ADRA2B;ACE;DRD2;EDN1;EGF;F2R;FOXO1;GJA1;ANXA1;APOE;IL1B;IL11;IL12B;INHA;INHBA;LEP;LGALS9;LIF;MIR17;MIR30C1;MIR33A;MAOB;CD200;NOTCH1;OPRM1;OXTR;PSMD9;SFRP1;WNK1;BRAF;TSPO;TNF;TNFRSF1A;TNFRSF1B;TRH;CCR2;UCN;ADIPOQ;CD74	12.2668	6.33e-29
GOBP_CELL_CELL_SIGNALING_BY_WNT	CDH3;YAP1;CTHRC1;LRRK2;COL1A1;MAPK14;CTNNB1;DLX3;DLX5;DRD2;EDN1;EDNRA;EGF;EGFR;EGR1;FGF2;FGF9;FGFR2;DKK1;FOXO1;FOXO3;GATA3;GREM1;RBMS3;GLI1;GLI3;GSK3B;HDAC1;APOE;IGFBP1;IGFBP6;RBPJ;ILK;MIR145;MIR29C;SMAD3;MDK;NFKB1;NOTCH1;OPRM1;WNT4;PPP2R1A;SULF2;PSEN1;PTEN;CCND1;SDC1;SFRP1;SFRP2;WNK1;SNAI2;SOX2;SOX9;SRC;HNF1B;TERT;TGFB1;TGFB1I1;TLR2;WNT7A;AXIN1;FZD7;LGR5;WNT3A;CCNE1;CDC42	6.43435	7.02e-29
GOBP_POSITIVE_REGULATION_OF_MIRNA_TRANSCRIPTION	EGR1;ETS1;FGF2;FOXO3;FOS;GATA2;GATA3;NR3C1;HIF1A;IL10;JUN;SMAD3;SMAD4;MYB;MYC;NGFR;PPARG;PRL;RELA;STAT3;TERT;TGFB1;TGFB2;TNF;TP53;WT1	46.0144	7.22e-29
GOBP_POSITIVE_REGULATION_OF_CELL_CYCLE	BCL2L11;CDK4;CDKN1B;PHB2;CKS1B;CCN2;CYP1A1;DRD2;EDN1;EGF;EGFR;EIF4EBP1;AIF1;AKT1;EZH2;FEN1;FGFR2;PLCB1;NUP62;POLDIP2;GLI1;TMOD3;ANXA1;HOXA13;APEX1;BIRC5;IGF1;IGF1R;IL1A;IL1B;IL10;INSR;MIR214;MDM2;MECP2;MNAT1;PDGFRB;WNT4;MED1;PRKCA;PSMD10;RB1;CCND1;SMOC2;SLC6A4;SOX15;SRC;BRCA2;ADAM17;TERT;TFDP1;TGFB2;TNF;XRCC3;BECN1;CCNB1;CDK1;CDC6;CDC42	7.41114	7.75e-29
GOBP_NEGATIVE_REGULATION_OF_PROTEOLYSIS	LRRK2;CPB2;AGT;AHSG;AKT1;F2;ANXA2;HGF;NR4A1;BIRC2;BIRC3;BIRC5;IL9;AQP1;IL10;USP17L2;KNG1;LPA;LTF;MIRLET7B;MIR126;MIR17;MIR195;MIR29C;MMP9;NGF;SERPINE1;SERPINB2;PAX2;SERPINF1;SERPINA1;PLAU;PSEN1;PTGS2;RAF1;RARRES1;ROCK1;SFRP2;SLPI;SMARCC1;SRC;THBS1;TIMP1;TIMP2;TIMP3;TIMP4;SERPING1;TNF;TP53;C3;C5;VEGFA;VTN;IL1R2;BAG6;RNF34;SERPINH1;CD44	7.58089	7.91e-29
GOBP_INTERLEUKIN_1_PRODUCTION	NOD1;CCR7;SIRPA;CX3CR1;EGR1;F2R;F2RL1;FOXP1;GSTP1;ANXA1;HDAC2;HK1;HMGB1;IFNG;IGF1;IL6;IL10;IL16;IL17A;LGALS9;MIR132;MIR142;MIR181C;MIR195;MIR204;MIR27B;SMAD3;ERRFI1;TREM2;MIR488;CCL19;CX3CL1;STAT3;TLR4;TNF;TYROBP;IL1R2;CD36	15.4937	9.07e-29
GOBP_POSITIVE_REGULATION_OF_DNA_METABOLIC_PROCESS	PPARGC1A;BRD8;PARP1;CTNNB1;CYP1B1;EGF;EGFR;ERCC1;ERCC2;AKT1;ERCC6;FGF2;FOXM1;SIRT1;GREM1;GLI1;DNMT3L;TBX21;H2AX;HGF;HMGB1;IGF1R;IL2;IL4;IL6;MAS1;MECP2;MLH1;MSH2;MYC;ATM;PCNA;PDGFRB;MAPK1;MAPK3;MAP2K7;PTPRC;BAX;ACTB;SMOC2;SMARCC1;SRC;BRCA1;STAT6;TERF1;TGFB1;TNF;UCN;WT1;XRCC1;STN1;ARID1A;BCAR3;CDK1	8.29282	1.26e-28
GOBP_NEGATIVE_REGULATION_OF_CELL_GROWTH	CDKN1A;CDKN1B;CDKN2A;SEMA3C;AGT;AGTR2;ENO1;ESR2;SIRT1;SH3BP4;GREM1;GJA1;FOXP1;INHBA;SMAD3;SMAD4;MAP2;ENPP1;PPARA;PPP2R1A;PPT1;SEMA6A;RB1;BCL2;RGS4;BCL6;SFRP1;SFRP2;SLIT3;SPP1;BTG1;TGFB1;TGFB2;TP53;WT1;DCSTAMP;HYAL2;NRP1;WNT3A;ACVR1B;SCGB3A1;SLIT2;SEMA3E;CDH1	11.5134	1.32e-28
GOBP_COGNITION	LILRB2;CNR1;CREB1;CRH;CX3CR1;DRD2;AGT;EGFR;EPHB2;FEN1;DKK1;PLCB1;FOS;GATM;HIF1A;APOE;INSR;ITGA5;ITGB1;KRAS;LHCGR;MDK;MECP2;MME;NGF;NTF3;NTF4;NTRK2;OXTR;SERPINF1;TREM2;PPT1;MAPK1;PSEN1;B2M;PTEN;PTGS2;PTN;BDNF;S100B;CCL11;SLC1A1;SLC2A4;SLC6A4;SRC;BRAF;TACR1;THRA;TLR2;CLDN5;TNF;UCN;VIP;CASP3;MAGT1	8.06032	1.38e-28
GOBP_REGULATION_OF_TRANS_SYNAPTIC_SIGNALING	LILRB2;PRRT2;LRRK2;CNR1;CRHR2;ADRA1A;CX3CR1;ACE;DRD2;AGT;EDN1;EPHB2;DKK1;PLCB1;RNF19A;GPER1;GSK3B;APOE;IL1B;ITGB1;KISS1;KRAS;MIR142;MECP2;MME;MIR342;NGF;NTF3;NTF4;NTRK2;OXTR;P2RX3;PRKCB;MAPK1;PSEN1;RETN;PTEN;PTGS2;PTN;PTPRD;RGS4;BDNF;S100B;CCL2;CX3CL1;SLC1A1;SLC6A4;SNCG;SRC;BRAF;SYP;SYT1;TACR1;TNF;CCR2;TYROBP;UCN;WNT7A;CA2;SLC38A1;SQSTM1;WNT3A;S1PR2;ADIPOQ;CDH1	6.46419	1.41e-28
GOBP_POSITIVE_REGULATION_OF_INTERLEUKIN_6_PRODUCTION	LILRB2;NOD1;AIF1;F2R;F2RL1;HMGB1;HSPD1;IFNG;IL1A;IL1B;IL1RAP;IL6;IL16;IL17A;LEP;LGALS9;NOS2;IL17D;STAT3;BTK;TLR2;TLR3;TLR4;TNF;TWIST1;TYROBP;UCN;XBP1;TSLP;HYAL2;BCL10;IL33;CD36;CD74	19.5694	1.54e-28
GOBP_MONOCYTE_CHEMOTAXIS	CCR1;CX3CR1;DUSP1;AIF1;FLT1;FPR2;GREM1;ANXA1;HMGB1;IL6;CXCL10;LGALS3;LYN;SERPINE1;CCL1;CCL2;CCL5;CCL11;CCL14;CCL16;CCL17;CCL19;CCL21;CCL22;CCL25;CX3CL1;CXCL12;CCR2;CALCA;SLIT2	27.289	1.54e-28
GOBP_MAINTENANCE_OF_LOCATION	CCR5;CCR7;CRP;TTC39B;DRD2;AKT1;ALB;F2;F2R;FBN1;FGF2;SIRT1;NR5A1;GBA;GPER1;CCDC22;GSTM2;ANXA1;HK1;APOE;IL1B;FASLG;IL6;IL10;IL13;CXCL10;ITGAV;ITGB3;LEP;LHCGR;LYN;MIR10B;MIR34A;CXCL9;NFKB1;NFKBIA;NOS1;P2RY6;ENPP1;TREM2;PPARA;PPARG;PSEN1;PSMD10;PTPRC;BAX;CCL19;CCL21;CX3CL1;TSPO;THY1;TNF;C3;TXN;TRPV1;CD19;CD36	7.62806	1.74e-28
GOBP_DEVELOPMENTAL_MATURATION	CDH3;CEBPA;CFTR;CLCN3;LRRK2;CTNNB1;CX3CR1;S1PR1;EDN1;EDNRA;EPO;ERCC2;FOXO3;AKR1B1;GATA2;GATA3;GBA;GREM1;GH1;GHRHR;ANG;HIF1A;IGF1;RBPJ;IHH;IL15;KDR;HES5;LEP;LTF;MECP2;MMP2;PAEP;PAX2;PGR;PPARG;PPP2R1A;SYBU;AXL;PTEN;IL21;RB1;BCL2;REN;CCL19;CCL21;CX3CL1;BRCA2;SYP;BTK;TGFB2;C3;VEGFA;YWHAZ	8.22589	1.77e-28
GOBP_METANEPHROS_DEVELOPMENT	YAP1;OSR2;CTNNB1;AGTR2;EGR1;FBN1;AKR1B1;GATA3;GREM1;GDNF;GLI3;HOXA11;CXCR2;AQP1;AQP2;HES5;LIF;SMAD4;MYC;PAX2;PDGFA;PDGFRA;PDGFRB;WNT4;BCL2;BMP4;BMP7;SOX9;HNF1B;TCF21;WT1;PAX8;ADIPOQ	20.9089	1.85e-28
GOBP_CELL_CYCLE_G1_S_PHASE_TRANSITION	CDK4;CDK6;CDKN1A;CDKN1B;CDKN2A;CDKN3;KHDRBS1;PHB2;CYP1A1;EGFR;EIF4EBP1;AIF1;AKT1;ESRRB;EZH2;PLCB1;GLI1;ANXA1;APEX1;ID2;INHBA;ITGB1;MIR214;MIR29C;MIR30C2;MDM2;MNAT1;MUC1;MYC;ATM;POLE;PTEN;MIR451A;MIR503;RB1;CCND1;BCL2;ACTB;CCL2;SKP2;SMARCC1;SOX2;ADAM17;TERT;TFDP1;TP53;ARID1A;KLF11;CCNE1;ACVR1B;CCNE2;CDC6	8.67735	1.92e-28
GOBP_FAT_CELL_DIFFERENTIATION	YAP1;CARM1;CEBPA;PPARGC1A;CREB1;MAPK14;DIO2;AKT1;FOXO1;PLCB1;SIRT1;GATA2;GATA3;GPER1;NR4A1;ID2;IL6;IL11;LEP;MIR17;MIR21;MIR27B;SMAD3;PDGFRA;ENPP1;PPARG;MED1;RETN;PTGS2;RARRES2;CCND1;MIR483;SFRP1;SFRP2;SLC2A4;BMP7;SNAI2;SOD2;SULT1E1;TGFB1;TGFB1I1;TNF;XBP1;ZFP36;HMGA2;AXIN1;WNT3A;ADIPOQ;GDF3	9.50187	1.99e-28
GOBP_RESPONSE_TO_CARBOHYDRATE	CDKN1B;TXNIP;CFTR;UCN3;CPB2;CCN2;ACE;EGR1;ERCC1;FOXO3;PLCB1;GHRHR;ANGPT2;GPER1;HIF1A;HLA-DRB1;FOXA2;APOA2;ICAM1;IGF1R;IL1A;IL1B;ITGA2;LEP;LYN;SMAD2;SMAD4;P2RX3;PAX2;SERPINF1;PIK3CA;TREM2;PRKCB;MAP2K7;PTGS2;RAF1;SOD2;HNF1B;THBS1;TNF;XBP1;CASP3;NR0B2;CASR;CAT;IRS2;ACVR2B;ADIPOQ	9.69659	3.18e-28
GOBP_DIGESTIVE_SYSTEM_DEVELOPMENT	ADA;YAP1;AGR2;CTNNB1;CYP1A1;MEGF8;EGFR;FGF9;FGFR2;GATA6;GLI1;GLI3;HIF1A;HOXA13;ID2;IHH;CXCL8;INSR;KCNQ1;SMAD2;SMAD3;NOTCH1;OXTR;PDGFRA;RARB;RARRES2;RB1;BCL2;SFRP1;SFRP2;BMP4;SOX9;SRC;HNF1B;TCF21;TGFB2;TGFB3;TNF;ACVR2B	14.078	3.19e-28
GOBP_REGULATION_OF_INTRINSIC_APOPTOTIC_SIGNALING_PATHWAY	BCL2L11;DNM1L;LRRK2;PARP1;ENO1;EPO;AKT1;SIRT1;DAPK2;HDAC1;HIF1A;MIR132;MIR17;MIR21;MIR27B;MDM2;MIF;MMP9;MUC1;MYC;NFE2L2;PIK3CB;TREM2;ACKR3;PTGS2;BAX;BCL2;BCL2L1;CXCL12;SFRP2;SNAI2;SNAI1;SOD1;SOD2;SRC;TP53;TPT1;XBP1;BECN1;CREB3L1;CD44;CD74	12.1556	3.64e-28
GOBP_POSITIVE_REGULATION_OF_LIPID_METABOLIC_PROCESS	PPARGC1A;CCR7;ADM;CREB1;AKT1;F2;FGF1;FGF2;FLT1;MTOR;FSHB;ANXA1;APOA2;HSD17B13;IFNG;APOE;IGF1R;CCN1;IL1A;IL1B;LYN;PDGFRA;PDGFRB;WNT4;PPARA;PPARG;PTGS2;CCL19;CCL21;SRC;STAR;TEK;TGFB1;TNF;TWIST1;IRS2;CD19;ADIPOQ;CD74;CDC42	13.2992	3.94e-28
GOBP_RESPONSE_TO_INSULIN	CDK4;COL1A1;ADM;PARP1;MAPK14;AGRP;AGT;EGR1;AHSG;AKT1;FOXO1;SIRT1;FOS;MTOR;MSTN;GHRHR;GSK3B;HSD11B2;IGF1R;IGFBP1;IL1B;IL10;INSR;KCNQ1;LEP;LYN;MIR195;ENPP1;PIK3CA;ERRFI1;PPARA;PPARG;PRKCB;RETN;RARRES2;RB1;SHC1;SLC2A1;SLC2A4;SMARCC1;SRC;SRD5A1;TLR2;XBP1;BCAR3;CAT;NCOA1;IRS2;TNFSF10;ADIPOQ;HDAC9	8.77473	3.96e-28
GOBP_HEPATICOBILIARY_SYSTEM_DEVELOPMENT	ADA;CEBPA;CPB2;CYP1A1;EZH2;FGF1;CADM1;GATA6;GLI1;GLI3;ANXA1;HGF;IHH;IL6;IL10;ITGA2;JUN;ARG1;SMAD3;MDK;MET;NOTCH1;PCNA;PIK3CA;WNT4;UGT1A1;MED1;PTN;CCND1;RELA;SOD2;SOX9;SRD5A1;HNF1B;TNF;VTN;XBP1;WNT3A;CLDN1	13.9439	4.26e-28
GOBP_ODONTOGENESIS	BCL2L11;FST;CFTR;OSR2;COL1A1;ADM;CSF1;CTNNB1;DLX3;EDN1;FGFR2;GATA6;GLI3;HDAC1;HDAC2;AQP1;AQP5;INHBA;LAMB1;NGFR;TNFRSF11B;SERPINE1;PDGFRA;PPARA;ANKH;HTRA1;BAX;NECTIN1;SDC1;BMP4;BMP7;SRC;BSG;TGFB2;TGFB3;TWIST1;ACVR2B;HAND2	14.6943	4.29e-28
GOBP_CELLULAR_ION_HOMEOSTASIS	ABCB6;CFTR;CLCN3;LRRK2;CCR1;CCR5;CCR7;DRD2;AGT;EDN1;EDNRA;F2;F2R;FGF2;GPER1;CCDC22;GSTM2;SLC40A1;HIF1A;IFNG;APOE;IL1A;FASLG;IL13;CXCL10;ITGB3;KCNQ1;LHCGR;LYN;MIR210;SMAD4;CXCL9;MYC;NOS1;P2RY6;ENPP1;PIK3CB;RMDN3;PPT1;PRKCB;MAPK1;MAPK3;PSEN1;PTPRC;BAX;BCL2;CCL1;CCL5;CCL11;CCL14;CCL19;CCL21;CX3CL1;CXCL12;SLC1A1;WNK1;SOD1;STC1;THY1;TPT1;TRPC6;CCR2;VDR;TRPV1;CA2;CALCA;CASR;STC2;CD19	5.89436	4.32e-28
GOBP_REGULATION_OF_LEUKOCYTE_MEDIATED_CYTOTOXICITY	KLRC4-KLRK1;RASGRP1;CD226;LILRB1;CRK;CX3CR1;F2RL1;KLRK1;CADM1;NCR3;HLA-B;HLA-DRB1;HLA-G;ICAM1;IL7R;IL12B;IL12RB1;ITGAM;KIR2DL4;KLRC1;ARG1;LEP;LGALS9;SH2D1A;NOS2;IL23A;B2M;PTPRC;PVR;IL21;TYROBP;VAV1	21.7322	4.82e-28
GOBP_REGULATION_OF_B_CELL_PROLIFERATION	ADA;CDKN1A;FCRL3;CTLA4;AHR;EPHB2;TNFRSF21;IL2;IL4;IL7;IL10;IL13;LYN;MIF;ATM;PRLR;PTEN;PTPRC;IL21;BCL2;BCL6;BTK;TLR4;TYROBP;CASP3;CARD11;IRS2;WNT3A;CD74	28.4322	5.25e-28
GOBP_ANATOMICAL_STRUCTURE_MATURATION	CDH3;CEBPA;CFTR;LRRK2;CTNNB1;CX3CR1;S1PR1;EDN1;EDNRA;EPO;ERCC2;FOXO3;AKR1B1;GATA2;GATA3;GBA;GREM1;GH1;GHRHR;ANG;HIF1A;IGF1;RBPJ;IHH;IL15;KDR;HES5;LEP;LTF;MECP2;MMP2;PAEP;PAX2;PGR;PPARG;PPP2R1A;AXL;IL21;RB1;BCL2;REN;CCL19;CCL21;CX3CL1;BRCA2;BTK;TGFB2;C3;VEGFA	9.26119	5.29e-28
GOBP_CELL_JUNCTION_ASSEMBLY	PDLIM5;CLDN4;CLDN3;CLDN7;CTNNB1;GPBAR1;ACE;DRD2;AGT;EPHA3;EPHB2;DKK1;PLXND1;FN1;POLDIP2;GREM1;GJA1;GJB2;IL1B;IL1RAP;IL17A;ITGA2;ITGA5;ITGB3;KDR;RHOC;MIR142;SMAD3;MECP2;MMP14;NTRK2;NTRK3;CLDN11;OXTR;WNT4;PRKCA;PTEN;PTPRD;NECTIN1;BCL2;ACTB;ROCK1;BDNF;SDC4;SFRP1;SNAI2;SNAI1;FSCN1;SRC;TEK;THBS1;THY1;TLR2;CLDN5;TNF;VEGFA;WNT7A;ACTN1;NRP1;WNT3A;CLDN1;CDC42;CDH1	6.52822	5.69e-28
GOBP_CANONICAL_WNT_SIGNALING_PATHWAY	CDH3;YAP1;CTHRC1;LRRK2;COL1A1;MAPK14;CTNNB1;DLX5;EDN1;EDNRA;EGF;EGFR;EGR1;FGF2;FGF9;FGFR2;DKK1;FOXO1;FOXO3;GATA3;GREM1;RBMS3;GLI1;GLI3;GSK3B;HDAC1;APOE;IGFBP1;IGFBP6;RBPJ;ILK;MIR145;MIR29C;SMAD3;MDK;NFKB1;NOTCH1;WNT4;PSEN1;PTEN;SDC1;SFRP1;SFRP2;WNK1;SNAI2;SOX2;SOX9;SRC;TGFB1;WNT7A;AXIN1;FZD7;LGR5;WNT3A	7.9999	5.74e-28
GOBP_REGULATION_OF_CYSTEINE_TYPE_ENDOPEPTIDASE_ACTIVITY	PDCD6;BCL2L11;NOD1;CCN2;DAPK1;AKT1;F2R;F3;SIRT1;GPER1;HGF;HMGB1;NR4A1;BIRC2;BIRC3;BIRC5;HSPD1;CCN1;FAS;FASLG;IL9;AQP1;LGALS9;LTF;MIRLET7B;MIR17;MIR27B;SMAD3;MMP9;MYC;NGFR;PAX2;PPARG;PTGS2;BAX;RAF1;SFRP2;SLC1A1;SOX2;SRC;THBS1;TNF;VEGFA;RNF34;TNFSF10;BCL10;WNT3A;CD44	9.54073	5.81e-28
GOBP_RESPONSE_TO_TOXIC_SUBSTANCE	ABCB6;CYP1A1;CYP1B1;DNMT3A;DRD2;AHR;ERCC6;ALB;SLC7A8;FOS;GATA6;GPX3;GPX4;GSTM1;GSTM2;GSTP1;GSTT1;HP;APOE;GSTK1;ARG1;LYN;MIR21;MAOB;MPO;NFE2L2;NOS3;PDGFRB;PON1;PTGS2;MIR451A;BAX;BCL2;CCL5;SDC1;SLC6A4;BMP7;SOD1;SOD2;SRD5A1;TLR2;TNF;TXN;CAT;CLDN1;CD36;PTGES;CDK1;CDH1	9.2149	6.41e-28
GOBP_NEGATIVE_REGULATION_OF_CELL_CYCLE	CDK6;CDKN1A;CDKN1B;CDKN2A;CEBPA;LILRB1;NUDT6;MAPK14;CTNNB1;DUSP1;ERCC6;EZH2;FANCD2;SIRT1;GATA3;GPER1;H2AX;HLA-G;NR4A1;HPGD;BIRC5;IL10;INHA;INHBA;LIF;MIR195;MIR21;MIR29C;MIR30C2;MDM2;MSH2;MUC1;ATM;PLK1;PTEN;PTGS2;MIR451A;MIR503;RB1;CCND1;BCL2;BCL6;CCL2;BMP4;BMP7;SOX2;BRCA1;BRCA2;BTG1;TERF1;NR2F2;TGFB1;TNF;TP53;XRCC3;CASP3;RUNX3;CCNB1;CLOCK;CDK1;CDC6	6.77315	6.66e-28
GOBP_GENE_SILENCING_BY_RNA	MIR543;MIR1185-1;ADAR;DDX5;EGFR;ELAVL1;ESR1;DICER1;IL6;MIRLET7B;MIRLET7D;MIR100;MIR10B;MIR122;MIR126;MIR132;MIR139;MIR141;MIR142;MIR143;MIR145;MIR148A;MIR154;MIR17;MIR181C;MIR183;MIR191;MIR195;MIR196A2;MIR20A;MIR200A;MIR200B;MIR200C;MIR204;MIR205;MIR21;MIR210;MIR214;MIR216A;MIR22;MIR23B;MIR27B;MIR29C;MIR30A;MIR30C1;MIR30C2;MIR31;MIR33A;MIR34A;SMAD2;SMAD3;MIR135B;MIR342;MIR370;MIR196B;MIR375;MIR37…	5.0328	8.98e-28
GOBP_POSITIVE_REGULATION_OF_MIRNA_METABOLIC_PROCESS	EGR1;ETS1;FGF2;FOXO3;FOS;GATA2;GATA3;NR3C1;HIF1A;IL10;JUN;SMAD3;SMAD4;MYB;MYC;NFKB1;NGFR;PPARG;PRL;RELA;STAT3;TERT;TGFB1;TGFB2;TNF;TP53;WT1	34.6357	9.07e-28
GOBP_NERVOUS_SYSTEM_PROCESS	CDH3;CDKN1B;LILRB2;MMP24;PRRT2;SCN11A;LRRK2;CNR1;COL1A1;CREB1;CRH;ADRA1A;CX3CR1;ACE;DRD2;AGT;AGTR2;S1PR1;EDN1;EDNRA;EGFR;EPHB2;NR2F6;AKT1;F2R;OR9Q1;FEN1;DKK1;PLCB1;DICER1;FOS;MTOR;GATM;GBA;GJB2;TNFRSF21;GPER1;GSK3B;GSTM2;HGF;HIF1A;NR4A1;BIRC5;IAPP;APOE;IL1A;AQP1;IL10;IL12B;INSR;ITGA2;ITGA5;ITGB1;KCNQ1;KRAS;LHCGR;TACSTD2;MDK;MECP2;MME;MIR342;NGF;NOS3;NTF3;NTF4;NTRK2;OPRM1;OXTR;P2RX3;P2RX5;PAX2;SER…	3.44308	1e-27
GOBP_CELLULAR_RESPONSE_TO_KETONE	CDK4;POSTN;CFTR;CREB1;CYP1B1;ACE;AKR1C2;AHR;AKT1;FOXO3;SIRT1;FOS;MSTN;GJB2;NR3C1;ACACA;IGF1R;AQP1;AR;ARG1;MIR342;P2RY6;SERPINF1;ERRFI1;TRERF1;PTGER2;PTGER4;PTGFR;SFRP1;SPP1;SRC;SRD5A1;KLF9;AKR1C3	17.9144	1.48e-27
GOBP_LYMPHOCYTE_MIGRATION	KLRC4-KLRK1;CXCL13;CCR7;CD200R1;CRK;S1PR1;AIF1;AKT1;KLRK1;GATA3;GBA;TBX21;ICAM1;CXCL10;ITGB3;CD200;PIK3CD;PIK3CG;CXCL16;CCL1;CCL2;CCL5;CCL11;CCL14;CCL16;CCL17;CCL19;CCL21;CCL22;CCL25;CX3CL1;CXCL12;WNK1;ADAM17;CCR2;ARTN	15.6764	1.73e-27
GOBP_ACUTE_INFLAMMATORY_RESPONSE	CCR7;CNR1;CRP;AHSG;EPO;F2;F3;FCGR3A;FN1;GATA3;GSTP1;HP;APOA2;IL1A;IL1B;IL4;IL6;CXCR2;MBL2;OGG1;OPRM1;IL22;SERPINA1;PIK3CG;UGT1A1;PTGS2;TACR1;BTK;TNF;C3;VCAM1;TRPV1;ZP3;CD163;PTGES	16.5867	2e-27
GOBP_REGULATION_OF_NIK_NF_KAPPAB_SIGNALING	NOD1;PHB2;EDN1;EGFR;PTPN22;GREM1;PDCD4;BIRC2;IL1B;IL12B;IL18;ILK;LGALS9;MIR132;MIR204;MIR21;MIR27B;MIR30C2;NR3C2;NFKBIA;IL23A;TREM2;RELA;CCL19;BMP7;TLR2;TLR3;TLR4;TNF;EZR;ACTN4;IL18R1;CD14;CD86;RASSF2	16.5867	2e-27
GOBP_DEVELOPMENTAL_GROWTH_INVOLVED_IN_MORPHOGENESIS	YAP1;SEMA3C;CRABP2;CSF1;CTNNB1;DPYSL2;S1PR1;EDN1;EDNRA;MEGF8;ESR1;FGF1;FGFR2;NEDD4L;FN1;LPAR3;GSK3B;APOE;ITGB1;AREG;L1CAM;LIMK1;MIR195;MAP2;NGF;NOTCH1;NRN1;MED1;SEMA6A;BDNF;CCL11;CXCL12;SFRP1;SFRP2;BMP4;SLIT3;SOX9;SPP1;SYT1;HNF1B;VEGFA;CXCR4;NRP1;WNT3A;SLIT2;SEMA3E;CDH1	9.53502	2.07e-27
GOBP_CELLULAR_HORMONE_METABOLIC_PROCESS	ADM;CRABP2;CYP1A1;CYP1A2;CYP1B1;CYP3A4;CYP11A1;CYP17A1;CYP19A1;CYP26A1;AKR1C1;AKR1C2;EGR1;ESR1;AKR1B1;FSHB;HSD3B1;HSD3B2;HSD17B1;HSD17B3;HSD17B2;LHB;LIPE;HSD17B7;PDGFRA;WNT4;UGT2B28;UGT1A1;MED1;RBP1;SPP1;SRD5A1;SRD5A2;SULT1E1;SULT1A1;TSPO;DHRS11;AKR1C3	13.8386	2.52e-27
GOBP_REGULATION_OF_ENDOCYTOSIS	LILRB1;LRRK2;DRD2;EGF;EPHA3;F2RL1;DKK1;NEDD4L;ALOX15;GATA2;GREM1;GH1;ANGPT1;ANXA2;APOE;IL4;INSR;ITGA2;ITGAV;ITGB3;LGALS3;MIR17;MIR205;MIR27B;NTF3;SERPINE1;PIK3CB;TREM2;PPT1;AXL;PSEN1;B2M;ROCK1;CCL19;CCL21;SELE;SRC;C3;VEGFA;VTN;WNT3A;CD14;ADIPOQ;CD36;CDC42	10.1595	2.73e-27
GOBP_CD4_POSITIVE_ALPHA_BETA_T_CELL_ACTIVATION	CD55;IL27;MTOR;GATA3;FOXP1;CD274;TBX21;ANXA1;HLA-DRB1;HMGB1;IFNG;IL2;IL2RA;IL4;IL6;IL12B;IL12RB1;IL18;LGALS9;MIR21;MYB;FOXP3;IL23A;PTGER4;IL21;BCL6;CCL19;BRAF;STAT3;STAT6;CARD11;RUNX1;RUNX3;IL18R1;CD86	16.3792	2.81e-27
GOBP_REGULATION_OF_GLIOGENESIS	IL34;CTNNB1;EZH2;F2;DICER1;MTOR;HDAC1;HDAC2;ID2;IL1B;IL6;KRAS;HES5;LIF;LTA;LYN;MIR142;MIR181C;MDK;MECP2;NOTCH1;NTRK3;TREM2;PTN;RB1;TGFB1;TSPO;TLR2;TNF;TNFRSF1B;TP53;VEGFC;CXCR4;IL33	17.4232	3.03e-27
GOBP_COLLAGEN_METABOLIC_PROCESS	MMP24;COL1A1;CCN2;F2;F2R;HDAC2;HIF1A;IHH;IL6;INHBA;ITGA2;ITGB1;ARG1;MIR145;MIR21;MMP1;MMP2;MMP3;MMP7;MMP9;MMP12;MMP13;MMP14;PDGFRB;ERRFI1;WNT4;BMP4;TGFB1;TGFB3;UCN;VIM;RUNX1;SERPINH1;CREB3L1	17.4232	3.03e-27
GOBP_POSITIVE_REGULATION_OF_SMALL_MOLECULE_METABOLIC_PROCESS	MTCO2P12;PPARGC1A;ADM;ENO1;AKT1;FGF1;FOXO1;SIRT1;MTOR;GPER1;ANXA1;HIF1A;IFNG;IGF1;APOE;IL1B;IL4;INSR;LHCGR;ARNT;MIR210;MAS1;NOS1;NOS2;NOS3;P2RY6;TREM2;WNT4;PPARA;PPARG;PSEN1;PTGS2;SRC;STAR;TNF;TWIST1;IRS2;ADIPOQ;CD74	13.0712	3.04e-27
GOBP_REGULATION_OF_LIPID_BIOSYNTHETIC_PROCESS	CDK4;ADM;CREB1;EGR1;AKT1;FGF1;SIRT1;MTOR;FSHB;NR5A1;GPER1;NR3C1;ANXA1;HSD17B13;IFNG;APOE;IGF1R;IGFBP7;CCN1;IL1A;IL1B;LEP;LHCGR;MIR132;MIR204;MIR30C1;MIR33A;NFKB1;PDGFA;WNT4;PPARA;PTGS2;SNAI2;SNAI1;SOD1;BRCA1;STAR;TSPO;TNF;C3;AKR1C3;CD74	11.3682	3.31e-27
GOBP_EPIDERMIS_DEVELOPMENT	CDH3;YAP1;FST;TXNIP;HPSE;CRABP2;CCN2;CTNNB1;DLX3;EGFR;ERCC2;EZH2;FGF2;FGFR2;DKK1;GATA6;INTU;GLI1;ANXA1;HDAC1;HDAC2;HLA-DRB1;RBPJ;IL1A;INHBA;INSR;KCNQ1;HES5;LAMC2;SMAD4;STS;NGFR;NOTCH1;YBX1;NTF4;PDGFA;ERRFI1;PPARA;MED1;MAP2K1;BCL2;RELA;ROCK1;BMP4;SNAI1;SOD1;SOX9;TFDP1;TGFB2;TNF;VDR;ZFP36;CASP3;LGR5;AKR1C3;ACVR1B;GDF3	7.09726	4.16e-27
GOBP_POSITIVE_REGULATION_OF_PEPTIDYL_SERINE_PHOSPHORYLATION	CSF3;EGFR;AKT1;ANGPT1;IFNA1;IFNA13;IFNG;IL6;IL11;LIF;MIF;NGF;NOS1;NTF3;NTF4;NTRK2;NTRK3;PAK1;PIK3CA;PTGS2;RAF1;BCL2;BDNF;SFRP2;BRAF;TGFB1;TNF;TXN;UCN;VEGFA;AXIN1;BCAR3;WNT3A;CD44	17.1876	4.32e-27
GOBP_POSITIVE_REGULATION_OF_TRANSMEMBRANE_TRANSPORT	CFTR;MAPK14;AGT;EDN1;EDNRA;EPHB2;AKT1;F2;F2R;GH1;GPER1;GSTM2;IFNG;IGF1;IL13;CXCL10;INSR;ITGB1;KCNQ1;LHCGR;MIR21;MIR210;CXCL9;NFE2L2;NOS1;P2RX3;P2RX5;P2RY6;TREM2;PSEN1;BAX;CCL2;CX3CL1;WNK1;BRAF;TERT;THY1;C3;TRPC6;CCR2;CA2;ACTN4;SLC38A1;IRS2;CD19;MS4A1;ADIPOQ	9.33605	4.55e-27
GOBP_ALPHA_BETA_T_CELL_DIFFERENTIATION	ADA;IL27;MTOR;GATA3;FOXP1;GLI3;TBX21;ANXA1;HLA-DRB1;HMGB1;IFNG;IHH;IL2;IL4;IL6;IL12B;IL12RB1;IL18;LGALS9;MIR21;MYB;FOXP3;IL23A;PTGER4;IL21;BCL2;BCL6;CCL19;BRAF;STAT3;STAT6;RUNX1;RUNX3;IL18R1;CD86	15.9716	5.45e-27
GOBP_ENDOCRINE_PROCESS	CRH;CRHR1;CYP19A1;ACE;AGT;AGTR1;AGTR2;EDN1;F2R;F2RL1;GATA3;GJA1;GNRHR;HSD11B2;IL1B;AQP1;INHA;INHBA;KCNQ1;KISS1;KRAS;LEP;SMAD4;NOS3;OXTR;PPARG;RETN;REN;SPP1;TACR1;TSPO;UCN	19.5929	5.68e-27
GOBP_CELLULAR_RESPONSE_TO_HYDROGEN_PEROXIDE	LRRK2;SIRPA;CYP1B1;EDN1;EZH2;FOXO3;SIRT1;FOXP1;ANXA1;HDAC2;HGF;APEX1;IL6;AQP1;IL10;ARG1;MIRLET7B;MIR17;MIR21;MIR34A;MET;NFE2L2;PAX2;PCNA;AXL;RELA;SRC;STAT6;TXN;CAT;BECN1;CDK1	19.5929	5.68e-27
GOBP_RESPONSE_TO_IONIZING_RADIATION	CDKN1A;YAP1;PARP1;MAPK14;DNMT3A;EGR1;ERCC1;ERCC6;FANCD2;SIRT1;GATA3;ANXA1;H2AX;IL1A;CXCL10;MIR21;MDM2;MSH2;MYC;ATM;PTPRC;BAX;CCND1;BCL2;BCL2L1;SFRP1;SFRP2;DCLRE1C;SNAI2;SOD2;BRCA1;BRCA2;TP53;VCAM1;XRCC4;CASP3;MTA1;CLOCK	13.4465	5.9e-27
GOBP_MACROPHAGE_ACTIVATION	CEBPA;LRRK2;CSF2;CX3CR1;AIF1;FCGR3A;FOXP1;HSPD1;IFNG;IFNGR1;IL4;IL6;IL10;IL13;ITGAM;JUN;MIR142;MIR145;MIR181C;MIF;CD200;ATM;TREM2;PTPRC;CX3CL1;THBS1;TLR2;TLR3;TLR4;TNF;TYROBP;TRPV1;IL33;CD74	16.9582	6.12e-27
GOBP_NEGATIVE_REGULATION_OF_MEGAKARYOCYTE_DIFFERENTIATION	CIB1;H4-16;GABPA;MYB;PF4;H4C15;H4C9;H4C1;H4C4;H4C6;H4C12;H4C11;H4C3;H4C8;H4C2;H4C5;H4C13;H4C14	332.325	7.83e-27
GOBP_PROTEIN_LOCALIZATION_TO_EXTRACELLULAR_REGION	DNM1L;CFTR;UCN3;CNR1;DRD2;F2R;F2RL1;FBN1;FGA;FOXO1;ANKRD1;ANG;GPER1;ANXA1;HIF1A;HLA-DRB1;FOXA2;IFNG;IGF1;APOE;IL1A;IL1B;IL1RN;IL6;IL12B;IL13;LEP;MIR17;MIR30C1;SMAD2;CD200;NOS2;OPRM1;TREM2;KRT20;PPARG;PSMD9;RAF1;CCL5;SFRP1;SNCG;HNF1B;TGFB1;TGFB2;TGFB3;TLR2;TLR4;TNF;TRH;VEGFC;EZR;VIP;NR0B2;CASR;IRS2;ACVR2B;CLOCK	6.95969	9.87e-27
GOBP_HUMORAL_IMMUNE_RESPONSE	CXCL13;PHB2;CCR7;CD55;DEFB4A;CFD;F2;FGA;GATA3;GATA6;TNFRSF21;ANG;CXCL1;HLA-DQB1;HLA-DRB1;CFI;IFNA1;IFNA13;IFNG;RBPJ;IL1B;IL6;IL7;CXCL8;IL17A;CXCL10;LGALS4;LTA;LTF;SH2D1A;MBL2;CXCL9;NOTCH1;PDCD1;PF4;PF4V1;TREM2;PTPRC;RARRES2;BCL2;RNASE3;CCL2;CXCL5;SLPI;SERPING1;TNF;C1R;C3;C5;C9;ZP3;MS4A1;CXCL14	7.66441	1.02e-26
GOBP_REGULATION_OF_FAT_CELL_DIFFERENTIATION	YAP1;CARM1;CEBPA;CREB1;MAPK14;AKT1;FOXO1;SIRT1;GATA2;GATA3;GPER1;ID2;IL6;LEP;MIR17;MIR21;MIR27B;SMAD3;ENPP1;PPARG;PTGS2;RARRES2;MIR483;SFRP1;SFRP2;BMP7;SNAI2;SOD2;SULT1E1;TGFB1;TGFB1I1;TNF;XBP1;ZFP36;AXIN1;WNT3A;ADIPOQ;GDF3	13.1971	1.03e-26
GOBP_REGULATION_OF_FIBROBLAST_PROLIFERATION	CDK4;CDK6;CDKN1A;CTNNB1;AGT;EGFR;ESR1;FN1;GSTP1;IGF1;AQP1;IL13;ITGB3;JUN;LIF;LTA;MIR17;MIF;MYC;NGFR;PDGFA;PDGFRA;PDGFRB;BAX;S100A6;SFRP1;SOD2;TP53;CCNB1;CD74;CDC6	20.6587	1.03e-26
GOBP_REGULATION_OF_PROTEIN_CONTAINING_COMPLEX_ASSEMBLY	BCL2L11;CDKN1B;CXCL13;PRRT2;CCR7;CLDN7;PARP1;CSF2;CSF3;ESR1;FKBP4;DKK1;ALOX15;MTOR;LMOD1;GBA;GSK3B;TMOD3;HCK;HMGB1;BIRC2;IAPP;IFNG;APOE;RHOC;STMN1;LGALS3;MIR17;MIR214;MAP2;MECP2;MET;MMP1;MMP3;ATM;PAK1;TREM2;VPS11;PTGER4;BAX;RAF1;RASA1;RB1;CCL11;CCL21;FSCN1;SOX9;SRC;TERF1;TGFB1;THRA;TLR4;TNF;TP53;VEGFA;ARHGAP28;SKAP1;SLIT2;CD36;CDC42	6.50327	1.15e-26
GOBP_REGULATION_OF_B_CELL_ACTIVATION	ADA;CDKN1A;FCRL3;CTLA4;AHR;EPHB2;TNFRSF21;TBX21;ID2;IL2;IL4;IL6;IL7;IL10;IL13;INHA;INHBA;LYN;MIF;MLH1;MMP14;MSH2;ATM;FOXP3;PRLR;PTEN;PTPRC;IL21;BCL2;BCL6;SFRP1;STAT6;BTK;TGFB1;TLR4;TYROBP;XBP1;CASP3;CARD11;IRS2;WNT3A;CD19;CD74	10.5087	1.16e-26
GOBP_NEGATIVE_REGULATION_OF_TRANSFERASE_ACTIVITY	CDKN1A;CDKN1B;CDKN2A;ADAR;CEBPA;CSK;AGT;DUSP1;EPHB2;AKT1;SIRT1;NUP62;PTPN22;GBA;MSTN;PDCD4;GSK3B;GSTP1;FOXA2;IFNG;APOE;IL1B;LIMK1;LYN;MIR20A;MIR27B;MIR34A;PIK3CB;PLK1;ERRFI1;PPARG;PSEN1;PTEN;PTPRC;RB1;SFRP1;SFRP2;BMP4;BMP7;SRC;TERF1;NR2F2;THY1;TP53;UCHL1;ZFP36;CASP3;IRS2;HYAL2;ADIPOQ	8.29208	1.18e-26
GOBP_FIBROBLAST_PROLIFERATION	CDK4;CDK6;CDKN1A;CKS1B;CTNNB1;AGT;EGFR;ESR1;FN1;GSTP1;IGF1;AQP1;IL13;ITGB3;JUN;LIF;LTA;MIR17;MIF;MYC;NGFR;PDGFA;PDGFRA;PDGFRB;BAX;S100A6;SFRP1;SOD2;TP53;CCNB1;CD74;CDK1;CDC6	17.6209	1.29e-26
GOBP_BONE_DEVELOPMENT	CDX1;LILRB1;AKAP13;OSR2;COL1A1;MAPK14;DLX5;MEGF8;FBN1;FGFR2;GREM1;GH1;GJA1;FOXP1;GLI3;ANXA2;HOXA11;HOXB4;HSD17B1;IGF1;IHH;KDR;LEP;LEPR;LOX;LTF;MMP13;MMP14;MED1;BNC2;SULF2;PTGER4;PTPRC;RARB;BMP4;BMPR1B;SOX9;SRC;SRD5A1;SRD5A2;STC1;TGFB3;TP53;TWIST1;TYROBP;SERPINH1	9.37702	1.33e-26
GOBP_RESPONSE_TO_TEMPERATURE_STIMULUS	PDCD6;MTCO2P12;MMP24;ADM;CPB2;DIO2;NR2F6;AKT1;FGF1;FOXO1;SIRT1;FOS;MTOR;MSTN;GSK3B;HDAC2;HSPD1;IGF1;IGFBP7;IL1A;CXCL10;LYN;ATM;NFKBIA;NGFR;NOS1;NOS3;P2RX3;MAP2K7;PTGS2;CXCL12;SOD1;SOD2;SST;TACR1;THBS1;THRA;TRPV1;CXCR4;CALCA;RNF34;CD14	10.8925	1.34e-26
GOBP_REGULATION_OF_ANIMAL_ORGAN_MORPHOGENESIS	PHB2;CTHRC1;CSF1;CTNNB1;AGT;AGTR2;EDN1;FGF1;FGF2;DKK1;GATA3;GREM1;GDNF;HGF;HOXA11;AR;TACSTD2;NGFR;TNFRSF11B;PAX2;PDGFA;WNT4;SFRP1;SFRP2;BMP4;BMP7;SNAI2;SOX9;TNF;VEGFA;WNT7A;WT1;PAX8;FZD7;WNT3A;CDC42	14.4958	1.53e-26
GOBP_POSITIVE_REGULATION_OF_CELL_GROWTH	YAP1;CIB1;CRABP2;HBEGF;EDN1;MEGF8;EGFR;ERBB2;AKT1;EXTL3;F2;NEDD4L;FN1;LPAR3;MTOR;IGF1;IGFBP1;IL2;IL9;L1CAM;LIMK1;MMP14;NGF;PSMD10;CXCL16;BCL2;BDNF;CXCL12;SFRP1;SFRP2;SYT1;ADAM17;TGFB2;TGFBR1;UCN;VEGFA;CXCR4;NRP1;WNT3A;CDC42	11.8298	1.53e-26
GOBP_REGULATION_OF_TRANSMEMBRANE_RECEPTOR_PROTEIN_SERINE_THREONINE_KINASE_SIGNALING_PATHWAY	TOB1;FST;PARP1;FBN1;FGF9;DKK1;SIRT1;GATA6;GREM1;MSTN;HDAC1;HDAC2;HOXA13;CCN1;RBPJ;ILK;INHA;INHBA;KDR;HES5;LOX;MIR17;MIR20A;MIR21;SMAD2;SMAD3;SMAD4;MIR342;NOTCH1;PPARA;PPARG;HTRA1;SFRP1;SFRP2;BMP4;BMP7;ADAM17;ZEB1;TGFB1;TGFB1I1;TGFB2;TGFB3;LEFTY2;TGFBR1;THBS1;TP53;TET1;AXIN1;ACVR1B;ACVR2B;GDF3	8.00678	1.53e-26
GOBP_CD4_POSITIVE_ALPHA_BETA_T_CELL_DIFFERENTIATION	IL27;MTOR;GATA3;FOXP1;TBX21;ANXA1;HLA-DRB1;HMGB1;IFNG;IL2;IL4;IL6;IL12B;IL12RB1;IL18;LGALS9;MIR21;MYB;FOXP3;IL23A;PTGER4;IL21;BCL6;CCL19;BRAF;STAT3;STAT6;RUNX1;RUNX3;IL18R1;CD86	20.296	1.55e-26
GOBP_NEGATIVE_REGULATION_OF_LEUKOCYTE_PROLIFERATION	LILRB2;LILRB1;CRP;CTLA4;ERBB2;GREM1;TNFRSF21;CD274;GSTP1;HLA-DRB1;HLA-G;IHH;IL2;IL2RA;IL10;IDO1;ARG1;LGALS9;LYN;MIR181C;ATM;FOXP3;ENPP3;PTEN;BCL6;SDC4;BMP4;BTK;TYROBP;CASP3;IL33;CD86	18.6738	1.8e-26
GOBP_CIRCADIAN_RHYTHM	PPARGC1A;CLDN4;CREB1;CRH;PARP1;CSF2;AGRP;DRD2;EGR1;AHR;NR2F6;EZH2;SIRT1;MTOR;GHRH;GHRHR;GSK3B;HDAC1;HDAC2;ID2;LEP;NGFR;NOS2;NTRK2;PPARA;PPARG;MAPK8;PTEN;RORB;SLC6A4;SRD5A1;KLF9;HNF1B;KLF10;TNF;TP53;NR0B2;HDAC3;MTA1;ADIPOQ;CLOCK;NCOR1;CDK1;NR1D2	9.9815	1.82e-26
GOBP_MUSCLE_HYPERTROPHY	PDLIM5;AKAP13;PARP1;ADRA1A;AGT;EDN1;EZH2;FOXO1;GATA6;MSTN;FOXP1;HDAC2;IGF1;LEP;MIR145;MIR17;MIR195;MIR20A;MIR21;MIR214;SMAD3;SMAD4;NOTCH1;ERRFI1;PPARA;PPARG;PRKCA;RGS4;ROCK1;TNFRSF1A;TNFRSF1B;BECN1;HAND2	17.3725	1.84e-26
GOBP_INTERLEUKIN_8_PRODUCTION	NOD1;CRP;F2R;F2RL1;F3;PTPN22;ANXA1;HMGB1;APOA2;IL1B;IL6;IL10;LEP;LGALS9;MIR100;MIR132;MIR204;NOS2;SERPINE1;IL17D;MIR488;PTPRC;RELA;STAT3;TLR2;TLR3;TLR4;TNF;HYAL2;BCL10;CD14;ADIPOQ;CD74	17.3725	1.84e-26
GOBP_REGULATION_OF_PHAGOCYTOSIS	OLFM4;SIRPA;CSK;AHSG;F2RL1;FPR2;ALOX15;GATA2;HCK;HMGB1;APOA2;IFNG;IL1B;IL2RB;IL15;ITGA2;ITGAV;MIR17;MIR183;MIR20A;MBL2;TREM2;PTPRC;CCL2;ATG3;SOD1;BTK;TLR2;TNF;C3;ADIPOQ;CD36;CD47	17.3725	1.84e-26
GOBP_TEMPERATURE_HOMEOSTASIS	PPARGC1A;CNR1;DECR1;DIO2;DRD2;EGR1;FOXO1;GATM;GJA1;IGF1R;RBPJ;IL1A;IL1B;IL4;IL13;IL15;IL18;LEP;LEPR;NOTCH1;OXTR;PRLR;PTGS2;RB1;STAT3;STAT6;ADAM17;THRA;TLR4;TNF;CCR2;VEGFA;TRPV1;CXCR4;IL18R1;HDAC3;SQSTM1;ACVR2B;ADIPOQ;CD36;PTGES	11.2512	1.86e-26
GOBP_RESPONSE_TO_BMP	TOB1;FST;DDX5;DLX3;DLX5;MEGF8;EGR1;FBN1;DKK1;GATA3;GATA6;GREM1;PDCD4;HOXA13;CCN1;RBPJ;ILK;KDR;HES5;MIR17;MIR20A;MIR21;SMAD2;SMAD3;SMAD4;NOTCH1;PPARG;MAPK3;HTRA1;SFRP1;SFRP2;BMP4;BMP7;BMPR1B;SOX9;TGFB1;TGFB2;TGFB3;LEFTY2;ACVR2B;GDF3	11.2512	1.86e-26
GOBP_REGULATION_OF_PROTEIN_SECRETION	DNM1L;CFTR;UCN3;CNR1;DRD2;F2R;F2RL1;FGA;FOXO1;ANKRD1;ANG;GPER1;HIF1A;HLA-DRB1;FOXA2;IFNG;IGF1;APOE;IL1A;IL1B;IL6;IL12B;IL13;LEP;MIR17;MIR30C1;CD200;NOS2;OPRM1;TREM2;KRT20;PPARG;PSMD9;CCL5;SFRP1;TGFB1;TGFB2;TGFB3;TLR2;TLR4;TNF;TRH;VEGFC;EZR;NR0B2;CASR;IRS2;CLOCK	8.67201	2.14e-26
GOBP_CELLULAR_RESPONSE_TO_DNA_DAMAGE_STIMULUS	BCL2L11;CDKN1A;CDKN1B;NDRG1;YAP1;CIB1;BRD8;PARP1;MAPK14;CTLA4;DDX5;EGFR;ERCC1;ERCC2;ERCC6;FANCD2;FEN1;FOXM1;NCOA6;FOXO1;FOXO3;SIRT1;MTOR;POLDIP2;ANKRD1;FOXP1;MSH6;GTF2H1;H2AX;HMGB1;APEX1;LYN;MIR34A;MDM2;MIF;MLH1;MNAT1;MSH2;MUC1;MYC;ATM;OGG1;PAK1;PCNA;PLK1;POLD1;POLE;PPP5C;MAPK1;MAPK3;PSEN1;ACKR3;PSMD10;BAX;CCND1;BCL2;BCL2L1;ACTB;BCL6;CXCL12;SFRP2;DCLRE1C;SNAI2;SMARCC1;SNAI1;SOD2;BRCA1;BRCA2;TNF;T…	4.31451	2.14e-26
GOBP_PROTEIN_LOCALIZATION_TO_ORGANELLE	DNM1L;CDKN1A;YAP1;TXNIP;CTCF;PHB2;LRRK2;H4-16;COL1A1;PARP1;MAPK14;CSE1L;AGT;EGF;ELAVL1;AKT1;ESR1;EZH2;F2;FGF9;NUP62;SH3BP4;NR5A1;INTU;GLI3;ANGPT1;GSK3B;HK1;HSPA4;HSPD1;IFNG;LEP;LHCGR;LIF;LMNB1;SMAD3;MDM2;MMP12;MSH2;NFKBIA;NGFR;NOTCH1;YBX1;PLK1;MED1;H4C15;VPS11;MAPK8;PSEN1;PTGS2;BAX;RB1;BMP4;BMP7;SOX9;SRC;BRCA2;STAT3;TERF1;TERT;TGFB1;TSPO;TP53;TXN;RGPD2;EZR;XRCC4;BAG6;H4C9;H4C1;H4C4;H4C6;H4C12;H4C…	4.22405	2.37e-26
GOBP_HORMONE_BIOSYNTHETIC_PROCESS	ADM;CYP11A1;CYP17A1;CYP19A1;DIO2;EGR1;AKR1B1;FSHB;NR3C1;HIF1A;HSD3B1;HSD3B2;HSD17B1;HSD17B3;HSD17B2;IGF1R;LHB;LHCGR;ARNT;NFKB1;HSD17B7;WNT4;MED1;SRD5A1;SRD5A2;TSPO;DHRS11;STC2	26.0597	2.42e-26
GOBP_NEGATIVE_REGULATION_OF_IMMUNE_RESPONSE	ADAR;LILRB1;CRK;PARP1;MAPK14;CTLA4;CD55;DRD2;AHR;ALOX15;TBX21;ANXA1;HCK;HLA-B;HLA-DRB1;HLA-G;IL2;IL4;IL7R;IL10;IL12B;KIR2DL4;KLRC1;ARG1;LGALS3;LGALS9;LYN;MIR21;MMP12;FOXP3;PDCD1;ENPP3;TREM2;PPARG;PTPRC;BCL6;SRC;STAT6;SERPING1;CCR2;NLRC5;IL33	10.6719	2.64e-26
GOBP_NEGATIVE_REGULATION_OF_IMMUNE_EFFECTOR_PROCESS	LILRB1;FCRL3;CRK;CX3CR1;CD55;AHR;ANGPT1;TBX21;ANXA1;HLA-B;HLA-G;APOA2;IL2;IL4;IL7R;IL10;KIR2DL4;KLRC1;ARG1;LGALS3;LGALS9;FOXP3;ENPP3;AXL;PTPRC;BCL6;TGFB1;TGFB2;TGFB3;SERPING1;TNF;TWIST1;CCR2;IL33;CD47	15.0523	2.69e-26
GOBP_REGULATION_OF_PROTEIN_BINDING	CDKN1A;CTHRC1;LRRK2;CRK;CRMP1;CSF3;ACE;AKT1;DKK1;PLXND1;POLDIP2;ANGPT1;GSK3B;ANXA2;IFIT1;APOE;IL10;LOX;MIR148A;MIR27B;MAP2;MMP9;PLK1;PPARA;MAPK3;MAPK8;PSEN1;B2M;BAX;ACTB;ROCK1;BDNF;BMP4;SLPI;SRC;TERT;TGFBR1;CLDN5;VTN;NRP1;WNT3A;ADIPOQ;CDC42	10.2427	2.77e-26
GOBP_REGULATION_OF_ALPHA_BETA_T_CELL_ACTIVATION	ADA;LILRB1;CD55;IL27;PTPN22;GATA3;GLI3;CD274;TBX21;ANXA1;HLA-DRB1;HMGB1;IFNG;IHH;IL2;IL2RA;IL4;IL12B;IL12RB1;IL18;LGALS9;MIR21;MYB;FOXP3;IL23A;PTPRC;BCL6;CCL19;CCR2;TYK2;CARD11;RUNX1;RUNX3;CD86	15.6932	4.55e-26
GOBP_RESPONSE_TO_PURINE_CONTAINING_COMPOUND	ADA;ABCC9;CARM1;CFTR;COL1A1;CREB1;CYP1B1;AHR;FOS;GATA6;GSTM2;HDAC2;APEX1;BIRC2;IL1B;AQP1;AQP9;AREG;KCNQ1;NT5E;P2RX3;P2RX5;P2RY6;ENPP1;PIK3CG;PTGS2;REN;SDC1;SLC6A4;SOD1;SRD5A1;STC1;BSG;EZR;TRPV1;WT1;ADIPOQ	13.2061	4.57e-26
GOBP_OVULATION_CYCLE_PROCESS	ESR1;FOXO3;SIRT1;FSHB;FSHR;NR5A1;MSTN;AMH;INHBA;KISS1;LEP;LHCGR;MMP2;NOS3;PDGFRA;PGR;RETN;BMPR1B;SLIT3;SRC;TGFB2;TGFB3;ZP3;CASP3;SLIT2	35.7081	4.8e-26
GOBP_CHEMOKINE_PRODUCTION	SIRPA;CSF1R;EGR1;AIF1;F2RL1;FOXP1;GSTP1;HIF1A;HMGB1;IFNG;IL1B;IL6;IL7;IL10;IL17A;IL18;LGALS9;MIR34A;MIF;TREM2;SNAI2;ADAM17;TLR2;TLR3;TLR4;TNF;C5;TWIST1;TSLP;IL33;ADIPOQ;CD74	17.8372	5.47e-26
GOBP_RENAL_TUBULE_DEVELOPMENT	YAP1;CTNNB1;AGT;AGTR2;FGF1;FGF2;GATA3;GREM1;GDNF;GLI3;HOXA11;AQP1;ILK;HES5;LIF;TACSTD2;SMAD4;MYC;NOTCH1;PAX2;WNT4;BCL2;BMP4;SOX9;HNF1B;TCF21;VEGFA;WT1;PAX8;LGR5;PROM1;HS3ST3B1	17.8372	5.47e-26
GOBP_CELLULAR_RESPONSE_TO_XENOBIOTIC_STIMULUS	NAT2;ABCC4;CYP2R1;CYP1A1;CYP1A2;CYP1B1;CYP2B6;CYP2C19;CYP3A4;CYP26A1;AKR1C1;EDN1;AHR;FMO2;ANKRD1;GSTM1;GSTM2;GSTP1;IL1B;ITGB3;KCNQ1;MYC;NFE2L2;NOS1;NOS2;PCNA;UGT2B28;UGT1A1;AHRR;RB1;REN;BRAF;SULT1A1;SULT2A1;TLR3;TP53;UCHL1;VAV1;CXCR4;NR1I2;ADIPOQ	10.8491	5.92e-26
GOBP_NEGATIVE_REGULATION_OF_EPITHELIAL_CELL_APOPTOTIC_PROCESS	CDKN1B;PAK4;ADAR;YAP1;FGA;GATA2;GATA3;ANGPT1;ICAM1;IGF1R;IL4;IL10;IL11;IL13;KDR;MIR126;MDK;NFE2L2;SERPINE1;PPARA;RB1;BCL2;BRAF;TEK;TERT;NDNF;HAND2	27.1459	8.47e-26
GOBP_RESPONSE_TO_VITAMIN	POSTN;COL1A1;CYP1A1;CYP26A1;DNMT3A;EPO;IGF1R;IL1A;IL15;CXCL10;ITGA2;ARG1;LEP;OGG1;MED1;PTGS2;CCND1;RXRA;SFRP1;BMP7;SNAI2;SOD2;SPP1;STC1;TSPO;VDR;CASR;CAT;STC2;BECN1	20.3384	9.41e-26
GOBP_POSITIVE_REGULATION_OF_REACTIVE_OXYGEN_SPECIES_METABOLIC_PROCESS	CDKN1A;MTCO2P12;CLCN3;CRP;MAPK14;CYP1B1;AKR1C1;AGT;AGTR1;F2;F2RL1;FOXO3;FPR2;GSTP1;ITGAM;LEP;NFE2L2;PDGFRB;SOD1;SOD2;TGFB1;THBS1;TSPO;TLR4;TP53;TYROBP;AKR1C3;CD36	24.2527	1.04e-25
GOBP_POSITIVE_REGULATION_OF_DNA_BINDING_TRANSCRIPTION_FACTOR_ACTIVITY	NOD1;CIB1;PPARGC1A;PHB2;CHUK;CSF3;CTH;CTNNB1;CX3CR1;AGT;EDN1;AKT1;ESR1;ESR2;GREM1;AMH;IL1B;IL1RAP;IL6;IL10;IL18;AR;LGALS9;LTF;SMAD3;CD200;PPARG;PRKCB;PTEN;RELA;CX3CL1;STAT3;TCF3;BTK;TFDP1;TLR2;TLR3;TLR4;TNF;VEGFA;CARD11;CAT;IL18R1;BCL10;WNT3A;CD36;CLOCK;CD40LG	8.31248	1.05e-25
GOBP_POSITIVE_REGULATION_OF_BINDING	CTHRC1;LRRK2;PARP1;CSF3;CTNNB1;ACE;EGF;ERCC2;PLXND1;POLDIP2;GATA3;GSK3B;ANXA2;HMGB1;IFNG;IGF1;APOE;EIF3E;ITGA2;STMN1;MET;MMP9;NGF;NME1;PON1;PPARG;PSEN1;B2M;RB1;BDNF;BMP4;TERT;TGFB1;CLDN5;TWIST1;TXN;VTN;NRP1;WNT3A;HAND2	11.042	1.32e-25
GOBP_TELENCEPHALON_DEVELOPMENT	CDK6;LRRK2;CRK;CSF1R;CTNNB1;ARX;DLX5;DRD2;EGFR;EMX2;EPHB2;EZH2;PLCB1;FOXP1;GLI3;GSK3B;H2AX;HDAC1;HIF1A;HPRT1;HSD3B1;HSD3B2;ID2;IGF1R;AQP1;INHBA;HES5;LAMB1;MAS1;MDK;NTRK2;OXTR;PSEN1;PTEN;BAX;RARB;CXCL12;SLC2A1;BMP4;SLIT3;SRD5A1;SRD5A2;XRCC1;CXCR4;CASP3;WNT3A;SLIT2	8.44324	1.85e-25
GOBP_SENSORY_PERCEPTION_OF_PAIN	MMP24;SCN11A;CNR1;ACE;EDN1;NR2F6;F2R;IAPP;IL1A;AQP1;IL10;IL12B;ITGA2;MECP2;MME;OPRM1;P2RX3;MAPK3;PTGS2;CCL2;CXCL12;TAC1;TACR1;TNF;CCR2;UCHL1;VIP;TRPV1;CXCR4;CALCA;IL33;PTGES	16.8316	2.25e-25
GOBP_POSITIVE_REGULATION_OF_I_KAPPAB_KINASE_NF_KAPPAB_SIGNALING	NOD1;AKAP13;CHUK;CCR7;CTH;CTNNB1;F2R;F2RL1;NUP62;GJA1;CCDC22;HLA-DRB1;BIRC2;BIRC3;TICAM2;IL1A;IL1B;FASLG;RHOC;LGALS1;LGALS9;LTF;PPP5C;PRKCB;RELA;S100A4;S100B;CCL19;CCL21;CX3CL1;SLC20A1;TLR3;TLR4;TNF;TNFRSF1A;CARD11;TNFSF10;BCL10;ADIPOQ;CD36;CD74	10.4091	2.25e-25
GOBP_NEPHRON_MORPHOGENESIS	CTNNB1;AGT;AGTR2;FGF1;FGF2;GATA3;GREM1;GDNF;GLI3;HOXA11;ILK;HES5;LIF;TACSTD2;SMAD4;MYC;PAX2;PDGFRB;WNT4;BCL2;BMP4;BMP7;SOX9;HNF1B;TCF21;VEGFA;WT1;PAX8;HS3ST3B1	21.1852	2.49e-25
GOBP_CELLULAR_METAL_ION_HOMEOSTASIS	ABCB6;CCR1;CCR5;CCR7;DRD2;AGT;EDN1;EDNRA;F2;F2R;FGF2;GPER1;CCDC22;GSTM2;SLC40A1;HIF1A;IFNG;APOE;IL1A;FASLG;IL13;CXCL10;ITGB3;LHCGR;LYN;MIR210;SMAD4;CXCL9;MYC;NOS1;P2RY6;PIK3CB;RMDN3;PRKCB;PSEN1;PTPRC;BAX;BCL2;CCL1;CCL5;CCL11;CCL14;CCL19;CCL21;CX3CL1;CXCL12;SLC1A1;SOD1;STC1;THY1;TPT1;TRPC6;CCR2;VDR;TRPV1;CALCA;CASR;STC2;CD19	6.19331	2.67e-25
GOBP_CALCIUM_ION_HOMEOSTASIS	CCR1;CCR5;CCR7;ADM;DRD2;EDN1;EDNRA;F2;F2R;FGF2;GPER1;GSTM2;APOE;FASLG;IL13;CXCL10;ITGB3;KDR;LHCGR;LYN;CXCL9;NOS1;NT5E;P2RY6;PIK3CB;RMDN3;PRKCB;ANKH;PSEN1;PTPRC;BAX;BCL2;CCL1;CCL5;CCL11;CCL14;CCL19;CCL21;CX3CL1;CXCL12;STC1;THY1;TPT1;TRPC6;CCR2;VDR;TRPV1;CALCA;CASR;STC2;CD19	7.44807	2.73e-25
GOBP_CELL_ADHESION_MEDIATED_BY_INTEGRIN	ADA;CIB1;CXCL13;CRK;CYP1B1;DPP4;FBN1;ICAM1;ITGA2;ITGA5;ITGAM;ITGAV;ITGB1;ITGB3;ITGB8;LIF;LYN;MUC1;SERPINE1;PIK3CG;PLAU;CCL5;CCL21;SFRP2;WNK1;SNAI2;ADAM17;TGFB2;VTN;SKAP1	19.2857	3.1e-25
GOBP_REGULATION_OF_CANONICAL_WNT_SIGNALING_PATHWAY	CDH3;YAP1;CTHRC1;LRRK2;COL1A1;MAPK14;CTNNB1;DLX5;EGF;EGFR;EGR1;FGF2;FGF9;FGFR2;DKK1;FOXO1;FOXO3;GREM1;RBMS3;GLI1;GLI3;GSK3B;HDAC1;APOE;IGFBP1;IGFBP6;RBPJ;ILK;MIR145;MIR29C;SMAD3;MDK;NFKB1;NOTCH1;PSEN1;SFRP1;SFRP2;WNK1;SNAI2;SOX2;SOX9;SRC;TGFB1;AXIN1;FZD7;LGR5;WNT3A	8.32384	3.12e-25
GOBP_POSITIVE_REGULATION_OF_CELL_PROJECTION_ORGANIZATION	PLXNC1;CCR7;CNR1;CRABP2;DOCK11;AGT;MEGF8;EPHA3;EPHB2;EPO;EZH2;F2RL1;PLXND1;FN1;LPAR3;MTOR;MSTN;GSK3B;HGF;APOE;IGF1R;ITGA2;L1CAM;LIMK1;LYN;MIR200C;MIR21;MDK;NFE2L2;NGF;NTRK2;NTRK3;SERPINF1;PIK3CA;MAP2K1;PTN;PTPRD;BDNF;CCL19;CCL21;CX3CL1;CXCL12;BMP7;FSCN1;SRC;BRAF;TGFB3;TGFBR1;VEGFA;NDNF;NRP1;WNT3A;SLIT2;CDC42	6.86468	3.49e-25
GOBP_MUSCLE_ADAPTATION	PARP1;ADRA1A;AGT;EDN1;AIF1;EZH2;FOXO1;FOXO3;GATA6;GATM;MSTN;FOXP1;IGF1;IL1B;IL15;MIR145;MIR17;MIR20A;MIR21;MIR214;SMAD3;SMAD4;NOS3;NOTCH1;ERRFI1;PPARA;PPARG;PRKCA;RGS4;ROCK1;TNFRSF1A;TNFRSF1B;BECN1;HAND2	14.4445	4.01e-25
GOBP_CELLULAR_LIPID_METABOLIC_PROCESS	CETP;PPARGC1A;SMPDL3A;PHB2;CNR1;SGPP2;CRABP2;MAPK14;CSF1R;CYP1A1;CYP1A2;CYP1B1;CYP2B6;CYP2C19;CYP3A4;CYP26A1;AKR1C1;AKR1C2;DECR1;DIO2;EDN1;AKT1;FGF2;AKR1B1;PLCB1;FMO2;SIRT1;ALOX15;GATA6;GBA;HPGDS;ANG;GPX4;GSTM1;GSTM2;GSTP1;ANXA1;ACACA;HPGD;APOA2;APOE;CCN1;IL1B;IMPA2;ITGB8;LEP;LIPC;LIPE;CYP4F3;MIR132;MIR204;MIR30C1;MIR33A;MECP2;MIF;ATM;PDGFA;PDGFRB;PIK3CA;PIK3CB;PIK3CD;PIK3CG;PLA2G2A;PON1;PPARA;UG…	3.91573	5.21e-25
GOBP_REGULATION_OF_CELL_JUNCTION_ASSEMBLY	PDLIM5;CLDN3;GPBAR1;ACE;AGT;EPHA3;EPHB2;DKK1;POLDIP2;GREM1;IL1B;IL1RAP;IL17A;KDR;MIR142;SMAD3;MMP14;NTRK2;NTRK3;OXTR;WNT4;PTEN;PTPRD;NECTIN1;ROCK1;BDNF;SDC4;SFRP1;SNAI2;SNAI1;SRC;TEK;THBS1;THY1;TLR2;CLDN5;TNF;VEGFA;WNT7A;NRP1;WNT3A;CLDN1	9.74713	5.25e-25
GOBP_NEGATIVE_REGULATION_OF_LEUKOCYTE_APOPTOTIC_PROCESS	ADA;LILRB1;CCR7;KIFAP3;FOXP1;HIF1A;IL2;IL7R;CXCR2;IDO1;KITLG;MIF;PDCD1;AXL;BCL2;BCL2L1;BCL6;CCL5;CCL19;CCL21;CXCL12;BMP4;IRS2;BCL10;CD74	30.9671	5.39e-25
GOBP_SKIN_DEVELOPMENT	CDH3;ABCB6;YAP1;FST;TXNIP;HPSE;COL1A1;CLDN4;CTNNB1;DLX3;EGFR;ERCC2;EZH2;FGFR2;DKK1;GATA6;GBA;INTU;ANXA1;HDAC1;HDAC2;RBPJ;IL1A;IL18;INHBA;ITGA2;STMN1;SMAD4;MET;NGFR;NOTCH1;PDGFA;ERRFI1;MED1;MAP2K1;PSEN1;BCL2;RELA;ROCK1;SNAI1;SOX9;TGFB2;TNF;VDR;ZFP36;CASP3;LGR5;AKR1C3;CLDN1;ACVR1B	7.49922	5.99e-25
GOBP_MITOTIC_CELL_CYCLE_PHASE_TRANSITION	CDK4;CDK6;CDKN1A;CDKN1B;CDKN2A;CDKN3;KHDRBS1;PHB2;CKS1B;CYP1A1;DUSP1;EGFR;EIF4EBP1;AIF1;ERCC2;AKT1;ESRRB;EZH2;FOXM1;PLCB1;TMOD3;ANXA1;APEX1;BIRC5;ID2;INHBA;ITGB1;MIR195;MIR214;MIR29C;MIR30C2;MDM2;MECP2;MNAT1;MUC1;MYC;ATM;PLK1;POLE;PTEN;MIR451A;RB1;CCND1;BCL2;ACTB;CCL2;SKP2;SMARCC1;BRCA1;ADAM17;TERT;TFDP1;TP53;XRCC3;ARID1A;KLF11;CCNB1;CCNE1;ACVR1B;CCNE2;CDK1;CDC6	5.74173	6.25e-25
GOBP_NEGATIVE_REGULATION_OF_VASCULATURE_DEVELOPMENT	CTNNB1;DCN;AGT;ANGPT2;HLA-G;FASLG;CXCL10;MIR143;MIR145;MIR17;MIR20A;MIR200B;MIR21;MIR214;MIR29C;MIR30C1;MIR34A;MECP2;MIR375;SERPINE1;SERPINF1;PF4;PIK3CB;WNT4;PPARG;PRL;MIR503;SEMA6A;ROCK1;TEK;TGFB2;THBS1;CLDN5;TNF;CCR2;CREB3L1;SEMA3E	12.0554	6.36e-25
GOBP_POSITIVE_REGULATION_OF_SMOOTH_MUSCLE_CELL_MIGRATION	CRK;CYP1B1;AGT;AIF1;FGF9;IGF1;ITGA2;ITGB3;MIR143;MIR20A;MIR21;MDK;MIR135B;P2RY6;PDGFRB;MIR451A;BCL2;CCL5;SRC;TERT;TLR4;VTN;NRP1	40.5932	6.44e-25
GOBP_REGULATION_OF_INNATE_IMMUNE_RESPONSE	KLRC4-KLRK1;RASGRP1;ADAR;CD226;LILRB1;CRK;PARP1;DRD2;KLRK1;FPR2;CADM1;NCR3;PTPN22;HCK;HLA-B;HLA-G;HMGB1;BIRC2;BIRC3;APOE;IL12B;KIR2DL4;KLRC1;ARG1;LEP;LGALS9;LYN;SH2D1A;MIR21;MBL2;MMP12;NFE2L2;PAK1;TREM2;PPARG;MED1;PVR;IL21;CCL5;SRC;TLR4;SERPING1;TYROBP;VAV1;NLRC5	8.69305	6.64e-25
GOBP_REGULATION_OF_RECEPTOR_SIGNALING_PATHWAY_VIA_STAT	CYP1B1;AGT;EGF;EPHB2;F2;F2R;GH1;IFNA1;IFNA13;IFNG;IL4;IL6;IL7R;IL9;IL10;IL12B;HES5;LEP;LIF;MST1;NOTCH1;IL23A;PPARG;PPP2R1A;PRL;PRLR;PTPRC;PTPRD;CCL5;TGFB1;TNF;TYK2;TSLP	15.0325	7.07e-25
GOBP_REGULATION_OF_LYMPHOCYTE_APOPTOTIC_PROCESS	ADA;BCL2L11;KIFAP3;FOXP1;CD274;HIF1A;IL2;IL7R;IL10;IDO1;LGALS3;LGALS9;LYN;MIF;PDCD1;PTEN;BAX;BCL2;BCL6;CCL5;BMP4;BTK;TP53;IRS2;BCL10;CD74	26.8623	8.23e-25
GOBP_CELLULAR_KETONE_METABOLIC_PROCESS	PPARGC1A;CNR1;ADM;CYP2B6;CYP11A1;CYP17A1;CYP19A1;AKR1C1;AKR1C2;EGR1;AKT1;AKR1B1;FMO2;SIRT1;FSHB;ANXA1;HSD11B2;HSD17B1;HSD17B3;IL1B;IDO1;LHB;CYP4F3;MIR132;MIR204;MIR21;MIR30C1;MIR33A;WNT4;PPARA;PPARG;PTGS2;SOX9;SRD5A1;SRD5A2;BRCA1;STAR;TWIST1;AKR1C3;IRS2;ADIPOQ;NCOR1;CD74	9.24359	8.84e-25
GOBP_NEPHRON_EPITHELIUM_DEVELOPMENT	YAP1;CTNNB1;AGT;AGTR2;EDNRA;FGF1;FGF2;GATA3;GREM1;GDNF;GLI3;HOXA11;AQP1;ILK;HES5;LIF;TACSTD2;SMAD4;MYC;NOTCH1;PAX2;WNT4;BCL2;BMP4;SOX9;HNF1B;TCF21;VEGFA;WT1;PAX8;PROM1;ADIPOQ;HS3ST3B1	14.8511	9.63e-25
GOBP_PROTEIN_LOCALIZATION_TO_NUCLEUS	CDKN1A;YAP1;TXNIP;PHB2;LRRK2;COL1A1;PARP1;MAPK14;CSE1L;AGT;ELAVL1;AKT1;F2;FGF9;NUP62;NR5A1;GLI3;ANGPT1;GSK3B;IFNG;LEP;LIF;LMNB1;SMAD3;MDM2;MMP12;NFKBIA;NGFR;NOTCH1;PLK1;MED1;PSEN1;PTGS2;BMP4;BMP7;SOX9;SRC;STAT3;TERT;TGFB1;TP53;TXN;RGPD2;HYAL2;HDAC3;SQSTM1;CD36;IPO13;CDK1;CDH1	7.38158	1.11e-24
GOBP_RESPONSE_TO_MONOSACCHARIDE	CDKN1B;TXNIP;CFTR;UCN3;CPB2;CCN2;ACE;EGR1;FOXO3;PLCB1;GHRHR;ANGPT2;GPER1;HIF1A;HLA-DRB1;FOXA2;APOA2;ICAM1;IGF1R;IL1A;ITGA2;LEP;SMAD2;SMAD4;PAX2;SERPINF1;PIK3CA;TREM2;PTGS2;RAF1;SOD2;HNF1B;THBS1;TNF;XBP1;CASP3;NR0B2;CASR;CAT;IRS2;ACVR2B;ADIPOQ	9.51366	1.18e-24
GOBP_RESPONSE_TO_RETINOIC_ACID	YAP1;PHB2;COL1A1;CREB1;CYP26A1;EPHA3;FGFR2;DKK1;GATA6;GJB2;GSK3B;HDAC2;HSD17B2;IGFBP7;AQP1;LEP;LYN;MMP2;ATM;NTRK3;PAX2;PDGFA;PDGFRB;SERPINF1;RORB;RXRA;SLC6A4;SOX9;TNF;FZD7;WNT3A;HAND2	15.7157	1.19e-24
GOBP_CELLULAR_SENESCENCE	MIR543;CDK6;CDKN1A;CDKN1B;CDKN2A;MAPK14;SIRT1;NUP62;H2AX;HLA-G;HMGA1;ID2;IGF1R;KIR2DL4;MIR17;MIR22;MIR34A;MIF;ATM;YBX1;PRELP;MAPK8;MAP2K1;MAP2K7;B2M;PTEN;BCL6;BRCA2;TERT;TP53;TWIST1;HMGA2	15.7157	1.19e-24
GOBP_VIRAL_LIFE_CYCLE	ADAR;CXCR6;CCR5;CD55;DPP4;AGTR1;EGFR;NR5A2;HLA-DRB1;HMGB1;ICAM1;IFI27;IFIT1;APOE;CXCL8;INSR;ISG20;ITGA2;ITGA5;ITGAV;ITGB1;ITGB3;LGALS1;LGALS9;LTF;MIR141;MIR30C1;MRC1;NCAM1;NOTCH1;VTA1;PPARA;SLC52A1;AXL;PVR;NECTIN1;BCL2;CCL2;CCL5;SLPI;BSG;TNF;CXCR4;HMGA2;NECTIN4;HYAL2;NRP1;CLDN1;CD86;CD74;CDK1	7.16692	1.23e-24
GOBP_LEUKOCYTE_HOMEOSTASIS	ADA;BCL2L11;DOCK11;CSF1;AKT1;F2R;SLC40A1;ANXA1;HIF1A;HMGB1;FAS;IL2;IL2RA;IL6;IL7R;CXCR2;LGALS9;LYN;KITLG;MIF;FOXP3;PIK3CB;PIK3CD;AXL;BAX;BCL2;ADAM17;BTK;CASP3;BCL10;CD74	16.7642	1.36e-24
GOBP_OSTEOCLAST_DIFFERENTIATION	LILRB1;CCR1;CREB1;MAPK14;CSF1;CSF1R;CTNNB1;FBN1;FOS;MTOR;FSHB;FOXP1;ANXA2;IAPP;IFNG;IL4;IL12B;IL17A;LTF;TNFRSF11B;IL23A;TREM2;SFRP1;SRC;KLF10;TLR3;TLR4;TNF;TYROBP;DCSTAMP;RASSF2	16.7642	1.36e-24
GOBP_POSITIVE_REGULATION_OF_INTERFERON_GAMMA_PRODUCTION	KLRC4-KLRK1;RASGRP1;CD226;LILRB1;F2RL1;KLRK1;IL27;PTPN22;HLA-DPB1;HSPD1;IL1B;IL1R1;IL2;IL12B;IL12RB1;IL18;LGALS9;LTA;IL23A;IL21;TLR3;TLR4;TNF;CCR2;TYK2;ZP3;IL18R1;CD14	21.2716	1.51e-24
GOBP_POSITIVE_REGULATION_OF_RESPONSE_TO_WOUNDING	HPSE;CPB2;CLDN4;CLDN3;HBEGF;F2;F2R;F3;MTOR;ANXA1;IGF1R;ITGB1;MIR21;MDK;NFE2L2;SERPINE1;PLAU;PLG;MIR451A;PTN;SMOC2;BRAF;THBS1;VTN;XBP1;CXCR4;CLDN1;CD36	21.2716	1.51e-24
GOBP_STEROID_HORMONE_MEDIATED_SIGNALING_PATHWAY	YAP1;CARM1;PHB2;PARP1;DDX5;ESR1;ESR2;ESRRB;FKBP4;SIRT1;GHRHR;FOXP1;GPER1;NR3C1;HDAC1;AR;NR3C2;PAK1;PGR;PPARA;MED1;TRERF1;VPS11;RXRA;SFRP1;SKP2;BMP4;BMP7;SRC;BRCA1;TCF21;NR2C1;ARID1A;CLOCK;NCOR1	12.9652	1.56e-24
GOBP_NEGATIVE_REGULATION_OF_INTRINSIC_APOPTOTIC_SIGNALING_PATHWAY	LRRK2;ENO1;EPO;AKT1;SIRT1;HDAC1;HIF1A;MIR132;MIR17;MIR21;MDM2;MIF;MMP9;MUC1;NFE2L2;PIK3CB;ACKR3;PTGS2;BCL2;BCL2L1;CXCL12;SFRP2;SNAI2;SNAI1;SOD2;SRC;TPT1;XBP1;CREB3L1;CD44;CD74	16.5245	1.91e-24
GOBP_REGULATION_OF_WNT_SIGNALING_PATHWAY	CDH3;YAP1;CTHRC1;LRRK2;COL1A1;MAPK14;CTNNB1;DLX5;EGF;EGFR;EGR1;FGF2;FGF9;FGFR2;DKK1;FOXO1;FOXO3;GREM1;RBMS3;GLI1;GLI3;GSK3B;HDAC1;APOE;IGFBP1;IGFBP6;RBPJ;ILK;MIR145;MIR29C;SMAD3;MDK;NFKB1;NOTCH1;PPP2R1A;SULF2;PSEN1;SFRP1;SFRP2;WNK1;SNAI2;SOX2;SOX9;SRC;HNF1B;TERT;TGFB1;TLR2;AXIN1;FZD7;LGR5;WNT3A	6.9015	2.03e-24
GOBP_RESPONSE_TO_ORGANOPHOSPHORUS	ABCC9;CARM1;CFTR;COL1A1;CYP1B1;AKR1C1;AHR;FOS;GATA6;APEX1;BIRC2;IL1B;AQP1;AQP9;AREG;KCNQ1;NT5E;P2RX3;P2RX5;P2RY6;ENPP1;PIK3CG;PTGS2;REN;SDC1;SLC6A4;SOD1;SRD5A1;STC1;BSG;EZR;TRPV1;WT1;ADIPOQ	13.5224	2.29e-24
GOBP_NEGATIVE_REGULATION_OF_PEPTIDASE_ACTIVITY	AGT;AHSG;AKT1;ANXA2;HGF;NR4A1;BIRC2;BIRC3;BIRC5;IL9;AQP1;KNG1;LPA;LTF;MIRLET7B;MIR17;MIR195;MIR29C;MMP9;NGF;SERPINE1;SERPINB2;PAX2;SERPINF1;SERPINA1;PTGS2;RAF1;RARRES1;ROCK1;SFRP2;SLPI;SRC;THBS1;TIMP1;TIMP2;TIMP3;TIMP4;SERPING1;TNF;C3;C5;VEGFA;VTN;RNF34;SERPINH1;CD44	8.10141	2.59e-24
GOBP_CELL_MIGRATION_INVOLVED_IN_SPROUTING_ANGIOGENESIS	CIB1;EPHB4;AKT1;FGF2;GATA2;GREM1;ANXA1;NR4A1;ITGB1;KDR;MIR10B;MIR126;MIR132;MIR20A;MIR200C;MIR22;MIR27B;MIR29C;MIR31;NOTCH1;DLL4;PTGS2;MIR503;MIR483;TDGF1;THBS1;VEGFA;NRP1;SLIT2;HDAC9	17.4767	2.89e-24
GOBP_MUSCLE_CELL_APOPTOTIC_PROCESS	CDKN2A;DNMT1;AGT;EDN1;KIFAP3;SIRT1;GATA6;PDCD4;IFNG;IGF1;IGF1R;CXCR2;IL12B;MIR145;MIR17;MIR195;MIR20A;MIR21;MIR210;MIR34A;SMAD4;MDK;NFE2L2;PPARG;SFRP2;BMP7;SOD2;TP53;PAX8;HAND2	17.4767	2.89e-24
GOBP_REGULATION_OF_SUPRAMOLECULAR_FIBER_ORGANIZATION	CDKN1B;CIB1;AKAP13;CCR7;CSF3;CCN2;S1PR1;EDN1;F2RL1;FKBP4;ALOX15;MTOR;LMOD1;TMOD3;HCK;IAPP;APOE;RHOC;STMN1;LIMK1;MIR20A;MIR21;MIR214;TACSTD2;MIR31;SMAD3;SMAD4;MAP2;MECP2;MET;PAK1;PIK3CA;TREM2;WNT4;PSEN1;PTGER4;RASA1;RB1;RGS4;ROCK1;CCL11;CCL21;CX3CL1;SDC4;CXCL12;SFRP1;BRAF;TACR1;TGFB3;TGFBR1;ARHGAP28;NRP1;SLIT2;CD47;CDC42	6.35388	3.42e-24
GOBP_T_CELL_DIFFERENTIATION_INVOLVED_IN_IMMUNE_RESPONSE	IL27;MTOR;GATA3;FOXP1;TBX21;ANXA1;HLA-DRB1;HMGB1;IFNG;IL2;IL4;IL6;IL12B;IL12RB1;IL18;LGALS9;MIR21;MYB;FOXP3;IL23A;PTGER4;IL21;BCL6;CCL19;STAT3;STAT6;IL18R1;CD86	20.4369	3.46e-24
GOBP_INTERLEUKIN_10_PRODUCTION	LILRB1;F2RL1;TNFRSF21;CD274;HGF;HLA-DRB1;HMGB1;HSPD1;IL4;IL6;IL12B;IL13;IDO1;LGALS9;MIR145;FOXP3;IL23A;TREM2;STAT3;BTK;TLR2;TLR4;TYROBP;TSLP;CD40LG;CD47	24.7612	3.65e-24
GOBP_POSITIVE_REGULATION_OF_MYELOID_LEUKOCYTE_DIFFERENTIATION	CCR1;CREB1;CSF1;IL34;FOS;HLA-DRB1;ID2;IFNG;IL12B;IL17A;LIF;MIR145;KITLG;IL23A;PF4;TREM2;PRKCA;RB1;TGFB1;KLF10;TNF;TYROBP;DCSTAMP;RUNX1;CD74	27.3062	4.78e-24
GOBP_POSITIVE_REGULATION_OF_FIBROBLAST_PROLIFERATION	CDK4;CDK6;CDKN1A;AGT;EGFR;ESR1;FN1;IGF1;AQP1;IL13;ITGB3;JUN;LIF;MIR17;MIF;MYC;NGFR;PDGFA;PDGFRA;PDGFRB;S100A6;CCNB1;CD74;CDC6	30.7313	5.33e-24
GOBP_T_CELL_MEDIATED_IMMUNITY	LILRB1;CD55;AHR;CADM1;GATA3;TBX21;HLA-B;HLA-DRB1;HLA-G;HMGB1;HPRT1;HSPD1;ICAM1;IL1B;IL1R1;IL4;IL6;IL7R;IL12B;IL12RB1;IL18;KLRC1;ARG1;FOXP3;IL23A;B2M;PTPRC;PVR;TNFRSF1B;CCR2;ZP3;IL18R1	14.7447	5.75e-24
GOBP_POSITIVE_REGULATION_OF_INTERLEUKIN_12_PRODUCTION	CCR7;MAPK14;PLCB1;HLA-G;HMGB1;HSPD1;IFNG;IL12B;IL16;IL17A;IDO1;LEP;LGALS9;MDK;IL23A;RELA;CCL19;TLR2;TLR3;TLR4;CD36;CD40LG	40.7352	6.42e-24
GOBP_REGIONALIZATION	TSHZ1;CDX1;SEMA3C;CTNNB1;EDN1;MEGF8;EMX2;FGF1;FGF2;FGFR2;DKK1;HEY1;GREM1;GDNF;INTU;GLI1;GLI3;FOXA2;HOXA10;HOXA11;HOXB4;RBPJ;AR;ITGAM;HES5;SMAD2;SMAD3;SMAD4;ATM;NOTCH1;NTF4;PAX2;DLL4;PSEN1;SFRP1;SFRP2;BMP4;BMPR1B;SNAI1;HNF1B;TDGF1;NR2F2;TGFBR1;TP53;C3;WNT7A;WT1;PAX8;AXIN1;NRP1;WNT3A;ACVR2B;GDF3	6.53304	7.08e-24
GOBP_PEPTIDE_TRANSPORT	ABCC4;CFTR;UCN3;CNR1;CRH;CRHR1;DRD2;EDN1;FGA;FOXO1;GHRH;GHRHR;GJA1;GPER1;ANXA1;HIF1A;HLA-DRB1;FOXA2;IFNG;IL1B;IL1RN;IL6;AQP1;KISS1;LEP;SMAD2;NOS2;PSMD9;RAF1;CCL5;SFRP1;HNF1B;TNF;TRH;UCN;VIP;TRPV1;CA2;PAX8;NR0B2;CASR;IRS2;ACVR2B;CLOCK;CD74	8.10855	7.72e-24
GOBP_POSITIVE_REGULATION_OF_ENDOCYTOSIS	LRRK2;DRD2;EGF;F2RL1;NEDD4L;GATA2;GREM1;GH1;ANGPT1;ANXA2;APOE;IL4;INSR;ITGA2;NTF3;SERPINE1;TREM2;PPT1;AXL;B2M;CCL19;CCL21;SELE;C3;VEGFA;VTN;WNT3A;CD14;CD36;CDC42	16.6937	8.23e-24
GOBP_REGULATION_OF_T_CELL_MEDIATED_IMMUNITY	LILRB1;CD55;AHR;GATA3;TBX21;HLA-B;HLA-DRB1;HLA-G;HMGB1;HSPD1;IL1B;IL1R1;IL4;IL6;IL7R;IL12B;IL12RB1;IL18;KLRC1;ARG1;FOXP3;IL23A;B2M;PTPRC;PVR;TNFRSF1B;CCR2;ZP3;IL18R1	18.0056	8.52e-24
GOBP_CELLULAR_RESPONSE_TO_VASCULAR_ENDOTHELIAL_GROWTH_FACTOR_STIMULUS	MAPK14;DCN;AKT1;FLT1;ANXA1;NR4A1;IL12B;KDR;MIR20A;MIR21;MIR27B;MIR342;NOTCH1;PDGFRA;PDGFRB;PGF;PIK3CA;PIK3CB;PIK3CD;DLL4;SEMA6A;RELA;SMOC2;VCAM1;VEGFA;VEGFC;NRP1	21.3668	9.11e-24
GOBP_GLIAL_CELL_ACTIVATION	LRRK2;CX3CR1;AIF1;IFNG;IFNGR1;IL1B;IL4;IL6;IL13;ITGAM;JUN;MIR142;MIR181C;ATM;TREM2;PSEN1;PTPRC;CX3CL1;TLR2;TLR3;TNF;TYROBP;TRPV1;IL33	29.6661	9.36e-24
GOBP_KIDNEY_MORPHOGENESIS	LRRK2;CTNNB1;AGT;AGTR2;FGF1;FGF2;GATA3;GREM1;GDNF;GLI3;HOXA11;ILK;HES5;LIF;TACSTD2;SMAD4;MYC;PAX2;PDGFRB;WNT4;BCL2;BMP4;BMP7;SOX9;HNF1B;TCF21;VEGFA;WT1;PAX8;HS3ST3B1	16.448	1.16e-23
GOBP_EAR_DEVELOPMENT	BCL2L11;TSHZ1;CDKN1B;CEBPA;CTHRC1;OSR2;DLX5;EDN1;EDNRA;EPHB2;ESRRB;FGF2;FGF9;FGFR2;GATA2;GATA3;GJB2;GLI3;HOXA13;RBPJ;KCNQ1;HES5;NOTCH1;NTRK3;PAX2;PDGFA;PDGFRB;MAPK1;MAPK3;BCL2;SDC4;BMP4;SOD1;SOX2;SOX9;ZEB1;TGFB2;TGFB3;TWIST1;PAX8;LGR5;WNT3A	8.81823	1.42e-23
GOBP_PATTERN_SPECIFICATION_PROCESS	TSHZ1;CDX1;FST;SEMA3C;CTNNB1;EDN1;MEGF8;EMX2;FGF1;FGF2;FGFR2;DKK1;HEY1;GREM1;GDNF;INTU;GLI1;GLI3;HIF1A;FOXA2;HOXA10;HOXA11;HOXB4;RBPJ;IHH;AR;ITGAM;HES5;SMAD2;SMAD3;SMAD4;ATM;NOTCH1;NTF4;PAX2;DLL4;PSEN1;SFRP1;SFRP2;BMP4;BMP7;BMPR1B;SNAI1;STC1;HNF1B;ZEB1;TDGF1;NR2F2;TGFBR1;TP53;C3;WNT7A;WT1;PAX8;AXIN1;NRP1;WNT3A;ACVR2B;HAND2;GDF3	5.54541	1.62e-23
GOBP_REACTIVE_NITROGEN_SPECIES_METABOLIC_PROCESS	KLRC4-KLRK1;SIRPA;CX3CR1;CYP1B1;AGT;AGTR2;EDN1;AIF1;AKT1;KLRK1;IFNG;IL1B;IL10;INSR;MIR132;SMAD3;NOS1;NOS2;NOS3;PTGS2;SOD2;TSPO;TLR2;TLR4;TNF;TRPV1;CD36;CD47	18.9497	1.68e-23
GOBP_POSITIVE_REGULATION_OF_CELL_CYCLE_PROCESS	CDK4;PHB2;CCN2;CYP1A1;DRD2;EDN1;EGF;EGFR;AIF1;AKT1;EZH2;FEN1;PLCB1;NUP62;POLDIP2;GLI1;TMOD3;ANXA1;HOXA13;APEX1;BIRC5;IGF1;IGF1R;IL1A;IL1B;INSR;MIR214;MDM2;MECP2;PDGFRB;WNT4;MED1;RB1;CCND1;SOX15;ADAM17;TERT;TFDP1;TNF;XRCC3;BECN1;CCNB1;CDK1;CDC6;CDC42	7.88146	2.1e-23
GOBP_REGULATION_OF_TUBE_SIZE	UTS2;CHRM3;ADM;CRP;ADRA1A;ADRA2B;ACE;AGT;AGTR1;AGTR2;EDN1;EDNRA;F2R;F2RL1;FGA;GPER1;APOE;KNG1;LEP;MIR21;MMP2;NOS1;NOS3;OXTR;PTGS2;ACTA2;ROCK1;SLC6A4;SOD1;SOD2;TACR1;TNF;UCN;CALCA;CASR	11.6892	2.65e-23
GOBP_RECEPTOR_MEDIATED_ENDOCYTOSIS	LILRB1;ADM;DPP4;DRD2;EGF;DKK1;GREM1;GH1;ANGPT1;ANXA2;APOE;IL4;CXCL8;CXCR1;CXCR2;INSR;ITGAM;ITGAV;ITGB1;ITGB3;MIR17;MIR205;MIR27B;MRC1;NTF3;SERPINE1;PIK3CB;PPT1;PSEN1;B2M;ACKR3;CXCL16;SAG;CCL19;CCL21;SDC1;SELE;C3;VEGFA;EZR;VTN;WNT3A;CD14;ADIPOQ;CD36	7.80856	2.91e-23
GOBP_DIVALENT_INORGANIC_CATION_HOMEOSTASIS	CCR1;CCR5;CCR7;ADM;DRD2;EDN1;EDNRA;F2;F2R;FGF2;GPER1;GSTM2;APOE;FASLG;IL13;CXCL10;ITGB3;KDR;LHCGR;LYN;CXCL9;NOS1;NT5E;P2RY6;PIK3CB;RMDN3;PRKCB;ANKH;PSEN1;PTPRC;BAX;BCL2;CCL1;CCL5;CCL11;CCL14;CCL19;CCL21;CX3CL1;CXCL12;SLC1A1;STC1;THY1;TPT1;TRPC6;CCR2;VDR;TRPV1;CALCA;CASR;STC2;CD19	6.44628	3.12e-23
GOBP_LIPOPOLYSACCHARIDE_MEDIATED_SIGNALING_PATHWAY	MAPK14;CD55;AKT1;PTPN22;HCK;IL1B;IL18;LTF;LYN;MIF;NFKBIA;NOS3;PRKCA;MAPK1;MAPK3;CCL2;CCL5;CX3CL1;TGFB1;TLR2;TLR4;TNF;BCL10;CD14;CD36	24.4445	3.48e-23
GOBP_NEGATIVE_REGULATION_OF_CELLULAR_RESPONSE_TO_GROWTH_FACTOR_STIMULUS	PDCD6;TOB1;CXCL13;DCN;AGT;AGTR2;FBN1;FGF2;DKK1;GATA3;GREM1;IL4;IL12B;MIR17;MIR20A;MIR200C;MIR342;NGFR;NOTCH1;PIK3CB;WNT4;PPARG;SULF2;HTRA1;MIR503;SEMA6A;SFRP1;SFRP2;THBS1;CREB3L1;SLIT2;GDF3	13.5724	4.51e-23
GOBP_REGULATION_OF_GTPASE_ACTIVITY	KLRC4-KLRK1;RASGRP1;PLXNC1;CXCL13;LRRK2;CCR7;CRK;DOCK11;S1PR1;EPHA3;ERBB2;EZH2;F2R;F2RL1;KLRK1;PLXND1;SH3BP4;MTOR;POLDIP2;GSK3B;ITGB1;USP17L2;RHOG;STMN1;MIR21;MET;NTF3;NTRK2;NTRK3;WNT4;FGD6;RASA1;RGS4;BCL6;CCL1;CCL2;CCL5;CCL11;CCL14;CCL16;CCL17;CCL19;CCL21;CCL22;CCL25;CX3CL1;SFRP1;WNK1;SOD1;THY1;VAV1;BCAR3;RGS6	6.22651	4.98e-23
GOBP_PROSTATE_GLAND_DEVELOPMENT	CDKN1B;CTNNB1;CYP19A1;ESR1;FGFR2;FKBP4;GLI1;GLI3;ANXA1;HOXA10;HOXA11;HOXA13;TNC;AR;MMP2;NOTCH1;SERPINF1;PRLR;PTEN;SFRP1;BMP4;BMP7;SOX9	30.4807	5.27e-23
GOBP_REGULATION_OF_MORPHOGENESIS_OF_A_BRANCHING_STRUCTURE	PHB2;LRRK2;CTNNB1;AGT;AGTR2;ESR1;FGFR2;GREM1;GDNF;HGF;AR;TACSTD2;MDK;PAX2;PDGFA;SFRP1;BMP4;BMP7;SNAI2;SOX9;TNF;VEGFA;PAX8	30.4807	5.27e-23
GOBP_NEGATIVE_REGULATION_OF_KINASE_ACTIVITY	CDKN1A;CDKN1B;CDKN2A;ADAR;CEBPA;CSK;AGT;DUSP1;EPHB2;AKT1;SIRT1;NUP62;PTPN22;GBA;MSTN;PDCD4;GSTP1;FOXA2;IFNG;APOE;IL1B;LYN;MIR20A;MIR34A;PIK3CB;PLK1;ERRFI1;PPARG;PSEN1;PTEN;PTPRC;RB1;SFRP1;SFRP2;BMP4;BMP7;NR2F2;THY1;UCHL1;CASP3;IRS2;HYAL2;ADIPOQ	8.16599	5.76e-23
GOBP_REGULATION_OF_CELL_CYCLE_PHASE_TRANSITION	CDK4;CDKN1A;CDKN1B;CDKN2A;PHB2;MAPK14;CYP1A1;DUSP1;EGFR;AIF1;ERCC2;AKT1;ERCC6;EZH2;FANCD2;PLCB1;GLI1;TMOD3;ANXA1;H2AX;APEX1;BIRC5;ID2;INHBA;USP17L2;MIR195;MIR214;MIR29C;MIR30C2;MDM2;MECP2;MNAT1;MSH2;MUC1;ATM;PLK1;PTEN;MIR451A;MIR503;RB1;CCND1;BCL2;ACTB;CCL2;SMARCC1;SOX2;BRCA1;BRCA2;ADAM17;TERT;TFDP1;TP53;XRCC3;ARID1A;CCNB1;CLOCK;CDK1;CDC6	5.5838	6.22e-23
GOBP_MYOBLAST_DIFFERENTIATION	SRA1;MAPK14;DDX5;PLCB1;GREM1;MSTN;IGF1;IGFBP3;RBPJ;IL18;CXCL10;ITGB1;LGALS1;CXCL9;NOTCH1;NRAS;PLG;RB1;ACTB;CCL17;SDC1;BMP4;SMARCC1;SOX9;SOX15;BTG1;TGFB1;TNF;ARID1A;WNT3A;GDF3	14.2728	6.25e-23
GOBP_POSITIVE_REGULATION_OF_CATABOLIC_PROCESS	MIR543;BCL2L11;TOB1;CDKN1B;NOD1;CEBPA;LRRK2;DAPK1;DCN;EGF;AKT1;FOXO1;FOXO3;SIRT1;SH3BP4;MTOR;RNF19A;GBA;CCDC22;MYLIP;GSK3B;HIF1A;HMGB1;APOA2;IFNG;IGF1;APOE;IL1B;IL4;IL6;INSR;KDR;ARNT;MIR210;MDM2;MLH1;ATM;NFE2L2;YBX1;PIK3CB;PLK1;TREM2;PPARA;VPS11;MAPK3;PSEN1;PSMD10;PTEN;BAX;ROCK1;SOX9;STX5;TNF;TNFRSF1B;TWIST1;EZR;VIP;ZFP36;BAG6;AXIN1;IRS2;BECN1;IL33	5.11005	6.46e-23
GOBP_INFLAMMATORY_RESPONSE_TO_ANTIGENIC_STIMULUS	RASGRP1;CCR7;CNR1;MAPK14;FCGR3A;GATA3;IL37;HCK;HLA-DRB1;HMGB1;RBPJ;IL1RN;IL2RA;CXCR2;IL10;IL12B;LTA;LYN;NOTCH1;OPRM1;TREM2;SRC;BTK;TNF;C3;ZP3;CD68	19.3111	6.95e-23
GOBP_NEGATIVE_REGULATION_OF_NERVOUS_SYSTEM_DEVELOPMENT	SEMA3C;CTNNB1;EPHB2;F2;KIFAP3;DKK1;DICER1;IL1B;IL6;HES5;MIR181C;MAP2;NOTCH1;NTRK3;TREM2;PSEN1;B2M;PTEN;SEMA6A;PTN;RB1;CCL11;GORASP1;BMP7;SPP1;TSPO;THY1;TLR2;TNF;TP53;WNT7A;NRP1;WNT3A;SEMA3E;CDH1	11.2881	6.95e-23
GOBP_REGULATION_OF_CATION_TRANSMEMBRANE_TRANSPORT	ABCC9;PHB2;CRH;CRHR1;CNIH3;DAPK1;DPP6;DRD2;AGT;EDN1;EDNRA;EPHB2;EPO;F2;F2R;NEDD4L;GPER1;REM1;GSTM2;IFNG;IL13;CXCL10;ITGB1;ITGB3;KCNQ1;ARG1;LHCGR;LYN;MIR200C;MIR21;MIR210;CXCL9;MMP9;NOS1;OPRM1;P2RX3;P2RX5;P2RY6;PIK3CG;TREM2;BAX;BCL2;RGS4;CCL2;CX3CL1;WNK1;THY1;TWIST1;CCR2;UTRN;ACTN4;SLC38A1;CD19;MS4A1	6.02889	7.53e-23
GOBP_OVARIAN_FOLLICLE_DEVELOPMENT	ESR1;FOXO3;FSHB;FSHR;AMH;GNRH1;ANG;INHA;INHBA;KDR;LHCGR;SMAD4;KITLG;MMP2;MMP14;ATM;BAX;BCL2;BCL2L1;BMPR1B;SOD1;SRC;VEGFA;ZP3	26.1899	7.73e-23
GOBP_RESPONSE_TO_AMYLOID_BETA	BCL2L11;PARP1;EPHB2;FOXO3;FPR2;GJA1;GSK3B;ICAM1;IGF1;IGF1R;MIR200A;MIR200C;MMP2;MMP3;MMP9;MMP12;MMP13;NGFR;TREM2;PSEN1;TLR4;TNF;VCAM1;CD36	26.1899	7.73e-23
GOBP_BONE_MINERALIZATION	OSR2;CCR1;S1PR1;AHSG;ERCC2;FGFR2;ALOX15;GREM1;HIF1A;IGF1;CCN1;LEP;LOX;LTF;SMAD3;MMP13;ENPP1;WNT4;ANKH;PTGS2;PTN;RXRA;BMP4;BMP7;BMPR1B;SOX9;TGFB1;TGFB3;KLF10;TWIST1;VDR;ACVR2B	13.2704	7.89e-23
GOBP_NEGATIVE_REGULATION_OF_PROTEIN_SERINE_THREONINE_KINASE_ACTIVITY	CDKN1A;CDKN1B;CDKN2A;CEBPA;AGT;DUSP1;AKT1;SIRT1;NUP62;PTPN22;GBA;PDCD4;GSTP1;APOE;IL1B;LYN;MIR20A;MIR34A;PIK3CB;PLK1;PPARG;PTEN;RB1;SFRP1;SFRP2;BMP4;BMP7;NR2F2;UCHL1;CASP3;HYAL2;ADIPOQ	13.2704	7.89e-23
GOBP_JNK_CASCADE	RASGRP1;NOD1;LRRK2;CCR7;CRK;SIRPA;CCN2;EGFR;ERCC6;F2RL1;PLCB1;PTPN22;PDCD4;GSTP1;HMGB1;IGF1R;IL1A;IL1B;SMAD3;NFKB1;MAPK8;MAP2K7;PTGER4;CCL19;CCL21;SFRP1;SFRP2;TLR3;TLR4;TNF;WNT7A;AXIN1;FZD7;CASR;HDAC3;NCOR1;RASSF2	10.1912	8.37e-23
GOBP_REGULATION_OF_MUSCLE_HYPERTROPHY	PARP1;ADRA1A;AGT;EDN1;FOXO1;MSTN;FOXP1;IGF1;MIR145;MIR17;MIR20A;MIR21;MIR214;SMAD3;SMAD4;NOTCH1;ERRFI1;PPARA;PPARG;PRKCA;RGS4;ROCK1;TNFRSF1A;TNFRSF1B;BECN1;HAND2	21.0048	8.39e-23
GOBP_NEGATIVE_REGULATION_OF_EPITHELIAL_CELL_MIGRATION	CXCL13;DCN;AGTR2;FGF2;ANGPT2;HMGB1;APOE;IL4;MIR132;MIR20A;MIR200B;MIR200C;MIR204;MIR21;TACSTD2;MIR22;MIR29C;MECP2;NOTCH1;SERPINF1;DLL4;PPARG;PTEN;MIR503;MIR483;STC1;NR2F2;TGFB1;THBS1;TNF;SLIT2	14.0989	8.4e-23
GOBP_ANIMAL_ORGAN_REGENERATION	ADM;CPB2;ACE;EZH2;GLI1;GLI3;ANGPT2;HGF;APOA2;IHH;IL6;IL10;NOTCH1;PCNA;PGF;UGT1A1;MED1;AXL;CCND1;CXCL12;TNF;VTN;NR0B2;CLDN1;CDK1	23.2083	8.83e-23
GOBP_NEGATIVE_REGULATION_OF_LIPID_LOCALIZATION	CRP;TTC39B;EGF;AKT1;APOA2;IL6;ITGAV;ITGB3;LEP;MIR148A;MIR17;MIR27B;MIR30C1;MIR33A;MIR34A;NFKB1;NFKBIA;TREM2;PPARA;PPARG;MIR33B;THBS1;TSPO;TNF;IRS2	23.2083	8.83e-23
GOBP_APPENDAGE_MORPHOGENESIS	BCL2L11;SEMA3C;OSR2;CRABP2;CTNNB1;DLX5;MEGF8;FGF9;FGFR2;DKK1;GREM1;INTU;GLI3;HDAC1;HDAC2;HOXA10;HOXA11;HOXA13;IHH;SMAD4;NOTCH1;MED1;PSEN1;SALL4;BAX;RARB;SFRP2;BMP4;BMP7;SOX9;TGFB2;TWIST1;WNT7A;HAND2	11.7664	9.2e-23
GOBP_CALCIUM_MEDIATED_SIGNALING	ADA;CIB1;CXCR6;CCR9;CHRM3;LRRK2;CCR1;CCR5;CCR7;CCR8;CX3CR1;AGTR1;EDN1;FCGR3A;FPR2;MTOR;NR5A2;NR5A1;CXCR3;GSK3B;GSTM2;IGF1;CXCL8;CXCR1;CXCR2;KDR;LHCGR;P2RX3;P2RX5;TREM2;ACKR3;PTBP1;PTGFR;PTPRC;SELE;BTK;TNF;CCR2;VCAM1;CXCR4	8.93445	1.03e-22
GOBP_CHROMATIN_ORGANIZATION	CDKN2B-AS1;CARM1;CTCF;BRD8;H4-16;DNMT1;DNMT3A;TET3;ERCC6;ESR1;EZH2;SIRT1;ITGB3BP;CHD5;GATA3;GPX4;NR3C1;DNMT3L;H2AX;HDAC1;HDAC2;HMGB1;HMGA1;FOXA2;KCNQ1;LMNB1;MECP2;MYB;MYC;PAK1;FOXP3;PIK3CA;H4C15;PRKCB;RB1;RELA;ACTB;BRD2;SMARCA1;SMARCC1;SNAI1;SOX2;SOX9;SOX15;BRCA1;BAG6;TET1;HMGA2;ARID1A;H3-4;H4C9;AXIN1;H4C1;H4C4;H4C6;H4C12;H4C11;H4C3;H4C8;H4C2;H4C5;H4C13;H4C14;HDAC3;MTA1;MTA2;NCOR1;HDAC9	4.68174	1.15e-22
GOBP_REGULATION_OF_NEUROINFLAMMATORY_RESPONSE	LRRK2;CD200R1;IGF1;IL1B;IL4;IL6;IL18;MIR142;MIR181C;MIR195;MMP3;MMP9;CD200;ATM;TREM2;PTGS2;PTPRC;CX3CL1;TNF;TNFRSF1B;IL33	38.8554	1.28e-22
GOBP_STEM_CELL_PROLIFERATION	YAP1;CEBPA;OSR2;CTNNB1;ACE;ERCC2;FBLN1;FGF2;FGF9;GBA;GJA1;GLI3;HOXB4;RBPJ;KDR;EPCAM;KITLG;NOTCH1;PTPRC;RARB;SFRP2;SNAI2;SOX9;BRCA2;TERT;TP53;VEGFC;NANOG;HMGA2;RUNX1;IRS2;CCNE1	12.9815	1.37e-22
GOBP_POSITIVE_REGULATION_OF_CELL_KILLING	KLRC4-KLRK1;RASGRP1;CD226;F2RL1;KLRK1;CADM1;NCR3;HLA-B;HLA-DRB1;HLA-G;IFNG;IL12B;IL12RB1;ITGAM;ARG1;SH2D1A;NOS2;IL23A;MAPK8;B2M;PTPRC;PVR;IL21;TYROBP;VAV1	22.6419	1.38e-22
GOBP_RESPONSE_TO_AXON_INJURY	DRD2;AIF1;EPO;FGF2;TNC;IGF1R;JUN;ARG1;LYN;MIR34A;MMP2;NTRK3;TREM2;AXL;MAP2K1;PTEN;PTN;BAX;BCL2;SLC1A1;SOD1;SOD2;SPP1;BRAF;TSPO;THY1;TYROBP;CDK1	17.085	1.51e-22
GOBP_AMIDE_TRANSPORT	ABCC4;CFTR;UCN3;CNR1;CRH;CRHR1;DRD2;EDN1;FGA;FOXO1;GHRH;GHRHR;GJA1;GPER1;ANXA1;HIF1A;HLA-DRB1;FOXA2;IFNG;IL1B;IL1RN;IL6;AQP1;AQP9;KISS1;LEP;SMAD2;NOS2;PSMD9;RAF1;CCL5;SFRP1;HNF1B;TNF;TRH;UCN;VIP;TRPV1;CA2;PAX8;NR0B2;CASR;IRS2;SLC33A1;ACVR2B;CLOCK;CD74	7.02818	1.51e-22
GOBP_REGULATION_OF_GRANULOCYTE_CHEMOTAXIS	DNM1L;CCR7;CSF1;CSF1R;IL34;DPP4;EDN1;DAPK2;MSTN;IL4;CXCL8;CXCR2;MDK;IL23A;MAPK1;MAPK3;RARRES2;CCL5;CCL19;CCL21;THBS1;SLIT2;CD74	28.418	1.59e-22
GOBP_CHROMATIN_REMODELING	CDKN2B-AS1;CTCF;H4-16;DNMT1;DNMT3A;ERCC6;ESR1;EZH2;SIRT1;ITGB3BP;CHD5;GATA3;DNMT3L;H2AX;HDAC1;HDAC2;HMGB1;HMGA1;LMNB1;MECP2;MYB;MYC;PAK1;FOXP3;PIK3CA;H4C15;RB1;ACTB;BRD2;SMARCA1;SMARCC1;SNAI1;SOX9;TET1;HMGA2;ARID1A;H3-4;H4C9;AXIN1;H4C1;H4C4;H4C6;H4C12;H4C11;H4C3;H4C8;H4C2;H4C5;H4C13;H4C14;MTA1;MTA2	6.16134	1.88e-22
GOBP_NEGATIVE_REGULATION_OF_SMOOTH_MUSCLE_CELL_PROLIFERATION	CDKN1A;CDKN1B;PPARGC1A;AIF1;PDCD4;ANG;GPER1;IFNG;APOE;IGFBP3;IL10;IL12B;IL15;MIR143;MIR145;MIR214;MIR34A;NOS3;PPARG;PTEN;MIR503;SOD2;TGFB3;VIP;S1PR2;ADIPOQ	20.1291	1.91e-22
GOBP_MATERNAL_PROCESS_INVOLVED_IN_FEMALE_PREGNANCY	CNR1;PARP1;AGRP;EPOR;AKT1;ESR1;GJB2;ANGPT2;IHH;AR;ARG1;LGALS9;LIF;PGR;WNT4;MED1;PTGS2;PTN;SPP1;STC1;BSG;NR2F2;VDR;STC2	24.718	2.06e-22
GOBP_MESONEPHRIC_TUBULE_MORPHOGENESIS	CTNNB1;AGT;AGTR2;FGF1;FGF2;GATA3;GREM1;GDNF;GLI3;HOXA11;ILK;TACSTD2;SMAD4;MYC;PAX2;WNT4;BCL2;BMP4;SOX9;HNF1B;TCF21;VEGFA;WT1;PAX8;HS3ST3B1	22.1025	2.15e-22
GOBP_CHROMOSOME_ORGANIZATION	CTCF;PHB2;H4-16;PARP1;CTNNB1;DNMT1;DUSP1;ERCC1;ERCC2;EZH2;FANCD2;FEN1;ITGB3BP;NUP62;CHD5;GPER1;MSH6;ANXA1;HMGB1;HMGA1;APEX1;BIRC5;MLH1;MNAT1;MSH2;MYC;ATM;PCNA;RMDN1;PLK1;PPP2R1A;H4C15;MAPK1;MAPK3;MAP2K7;RB1;ACTB;DCLRE1C;SMARCC1;SRC;BRCA2;TERF1;TERT;XRCC1;XRCC3;BAG6;STN1;HMGA2;ARID1A;H4C9;H4C1;H4C4;H4C6;H4C12;H4C11;H4C3;H4C8;H4C2;H4C5;H4C13;H4C14;BECN1;CCNB1;CCNE1;CCNE2;CDK1;CDC6	4.68575	2.21e-22
GOBP_REGULATION_OF_CELL_DIVISION	KIF20A;CIB1;TXNIP;DRD2;ESRRB;FGF1;FGF2;FGF9;FGFR2;NUP62;POLDIP2;INTU;BIRC5;IGF1R;IL1A;IL1B;MIR145;MDK;MYC;YBX1;PDGFA;PGF;PLK1;POU5F1;PTN;BCL2L1;SFRP2;BRCA2;TGFB1;TGFB2;TGFB3;VEGFA;VEGFC;PROK1;CAT;BECN1;CDC6;CDC42	9.43009	2.28e-22
GOBP_REGULATION_OF_OXIDOREDUCTASE_ACTIVITY	CDH3;NOD1;PHB2;LRRK2;CNR1;AGT;AGTR1;AGTR2;EDN1;EGFR;AKT1;GDNF;HIF1A;HP;IFNG;APOE;IL1A;IL1B;IL13;LEP;MIR132;MIR21;MIR27B;NFKB1;MIR378A;PIK3CB;S100A1;TERT;TNF;VDR	14.3318	2.76e-22
GOBP_CELLULAR_EXTRAVASATION	OLFM4;CRK;SIRPA;CX3CR1;PLCB1;ICAM1;IL1R1;ITGB1;LEP;MDK;PIK3CD;PIK3CG;PTGER4;ROCK1;CCL2;CCL21;CCL25;CX3CL1;CXCL12;SELE;SELL;THY1;TNF;CCR2;VCAM1;CD47	19.7181	2.85e-22
GOBP_REGULATION_OF_COAGULATION	HPSE;CPB2;EDN1;EPHB2;F2;F2R;F2RL1;F3;FGA;ANXA2;FOXA2;APOE;KNG1;NFE2L2;NOS3;SERPINE1;SERPINB2;PDGFA;PDGFRA;PLAU;PLG;PSEN1;THBS1;SERPING1;VTN;CD36	19.7181	2.85e-22
GOBP_PROTEIN_AUTOPHOSPHORYLATION	LRRK2;CSF1R;CSK;DAPK1;ACE;EGFR;EPHB4;ERBB2;AKT1;FGFR2;FLT1;DAPK2;MTOR;GREM1;GSK3B;HCK;IGF1R;INSR;JUN;KDR;LYN;ATM;NTRK2;PAK1;PDGFA;PDGFRA;PDGFRB;ENPP1;ERRFI1;MAPK3;PRLR;PTPRC;SRC;BTK;TEK;THY1;VEGFA;VEGFC;ACVR1B;ADIPOQ;RASSF2	8.32077	3.03e-22
GOBP_ENDODERM_DEVELOPMENT	CTNNB1;DUSP1;DUSP2;DKK1;FN1;GATA6;HDAC1;INHBA;ITGA5;ITGAV;LAMB1;SMAD2;SMAD3;SMAD4;MMP2;MMP9;MMP14;NOTCH1;POU5F1;MAP2K1;BMP4;SOX2;HNF1B;VTN;NANOG;HMGA2;GDF3	17.9312	3.14e-22
GOBP_POSITIVE_REGULATION_OF_TYROSINE_PHOSPHORYLATION_OF_STAT_PROTEIN	CSF1R;CSF2;EPO;GH1;HDAC2;IFNG;IGF1;IL2;IL4;IL6;IL12B;IL13;IL15;IL18;HES5;LEP;LIF;LYN;IL23A;IL21;CCL5;TNF;TNFRSF1A;VEGFA;TSLP	21.5881	3.32e-22
GOBP_REGULATION_OF_OSTEOCLAST_DIFFERENTIATION	LILRB1;CCR1;CREB1;CSF1;CTNNB1;FBN1;FOS;MTOR;FSHB;IAPP;IFNG;IL4;IL12B;IL17A;LTF;TNFRSF11B;IL23A;TREM2;SFRP1;KLF10;TLR3;TLR4;TNF;TYROBP;RASSF2	21.5881	3.32e-22
GOBP_EMBRYONIC_APPENDAGE_MORPHOGENESIS	BCL2L11;OSR2;CRABP2;CTNNB1;DLX5;MEGF8;FGF9;DKK1;GREM1;INTU;GLI3;HDAC1;HDAC2;HOXA10;HOXA11;HOXA13;IHH;SMAD4;NOTCH1;MED1;PSEN1;SALL4;BAX;RARB;SFRP2;BMP4;BMP7;TGFB2;TWIST1;WNT7A;HAND2	13.2881	3.5e-22
GOBP_NEGATIVE_REGULATION_OF_CATABOLIC_PROCESS	TOB1;LRRK2;CNR1;MAPK14;ADRA1A;EGFR;ELAVL1;AKT1;MTOR;POLDIP2;PTPN22;GDNF;ANXA2;HGF;HP;APOA2;IL1B;IL10;LEP;LEPR;MIRLET7B;MIR21;SMAD3;SMAD4;MET;NOS2;YBX1;PIK3CA;PIK3CG;TREM2;PPARA;PSEN1;BCL2;RELA;ROCK1;SMARCC1;STAT3;TSPO;TIMP1;TIMP2;TIMP3;TIMP4;TNF;TP53;VIP;ZFP36;BAG6;BECN1;NCOR1	6.50911	3.66e-22
GOBP_RESPONSE_TO_LIGHT_STIMULUS	CDKN1A;PARP1;AGRP;DRD2;EGFR;NR2F6;ERCC1;ERCC2;AKT1;ERCC6;FEN1;SIRT1;FOS;MSH6;HIF1A;ID2;AQP1;IL12B;ITGB1;KRAS;MECP2;MME;MMP1;MMP2;MMP3;MMP9;MSH2;MYC;OGG1;PCNA;POLD1;MAPK8;MAP2K7;PTGS2;BAX;CCND1;BCL2;RELA;SAG;BRAF;BRCA2;TIMP1;TP53;CASP3;CAT;HYAL2;MTA1;CLOCK	6.65346	4.21e-22
GOBP_CELLULAR_RESPONSE_TO_INORGANIC_SUBSTANCE	ABCB6;CDKN1B;CEBPA;CHUK;LRRK2;CREB1;CRK;PARP1;CYP1A1;CYP1A2;EDN1;EGFR;AKT1;FOXO1;FOS;ALOX15;SLC40A1;HSD17B1;AQP1;AQP2;JUN;MMP3;MMP9;MIR342;NFE2L2;OGG1;SERPINF1;MAPK1;MAPK3;MAPK8;B2M;PTGS2;SLC1A1;SOD1;BRAF;SYT1;TSPO;AKR1C3;BECN1;CLDN1;CDH1	8.23148	4.29e-22
GOBP_MUSCLE_CONTRACTION	ADA;ABCC9;MYL9;UTS2;CHRM3;LTB4R;ADRA1A;CCN2;ADRA2B;DRD2;AGT;EDN1;EDNRA;ENO1;F2R;NEDD4L;MTOR;LMOD1;GDNF;GJA1;GPER1;GSTM2;TMOD3;NR4A1;ITGA2;KCNQ1;MIR143;MIR145;MIR200C;MIR21;NOS1;OXTR;P2RX3;PIK3CA;PIK3CG;SULF2;PTGS2;ACTA2;ROCK1;SOD1;STC1;TACR1;TNF;TPM3;UCN;UTRN;TRPV1;CXCR4;CALCA;CALD1	6.31221	4.59e-22
GOBP_REGULATION_OF_ION_TRANSMEMBRANE_TRANSPORT	ABCC9;CFTR;SCN11A;CHRM3;PHB2;CRH;CRHR1;CNIH3;DAPK1;DPP6;DRD2;AGT;EDN1;EDNRA;EPHB2;EPO;F2;F2R;NEDD4L;GPER1;REM1;GSTM2;IFNG;IL13;CXCL10;ITGB1;ITGB3;KCNQ1;KCNQ2;ARG1;LHCGR;LYN;MIR200C;MIR21;MIR210;CXCL9;MMP9;NOS1;OPRM1;P2RX3;P2RX5;P2RY6;PIK3CG;TREM2;PSEN1;BAX;BCL2;RGS4;CCL2;CX3CL1;WNK1;THY1;TNF;TRPC6;TWIST1;CCR2;UTRN;ACTN4;SLC38A1;CD19;MS4A1	5.05851	4.65e-22
GOBP_RESPONSE_TO_UV	CDKN1A;PARP1;EGFR;ERCC1;ERCC2;AKT1;ERCC6;FEN1;SIRT1;MSH6;AQP1;IL12B;MME;MMP1;MMP2;MMP3;MMP9;MSH2;MYC;PCNA;POLD1;MAPK8;MAP2K7;PTGS2;BAX;CCND1;BCL2;RELA;BRCA2;TIMP1;TP53;CASP3;CAT;HYAL2	11.0458	4.92e-22
GOBP_POSITIVE_REGULATION_OF_GLIOGENESIS	IL34;DICER1;MTOR;HDAC1;HDAC2;ID2;IL1B;IL6;KRAS;LIF;LTA;LYN;MIR142;MDK;MECP2;NOTCH1;PTN;TGFB1;TSPO;TLR2;TNF;TNFRSF1B;VEGFC;CXCR4;IL33	21.0972	5.08e-22
GOBP_MAMMARY_GLAND_EPITHELIUM_DEVELOPMENT	PHB2;CSF1;CSF1R;AKT1;ESR1;FGF2;FGFR2;GATA3;NR3C1;HIF1A;ID2;AR;AREG;PGR;WNT4;MED1;MAPK1;PRLR;BAX;CCND1;CCL11;SRC;BRCA2;STAT6;VDR	21.0972	5.08e-22
GOBP_DEVELOPMENTAL_CELL_GROWTH	SEMA3C;PDLIM5;AKAP13;CRABP2;ADRA1A;CTNNB1;DPYSL2;AGT;EDN1;EDNRA;MEGF8;NEDD4L;FN1;LPAR3;FOXP1;GSK3B;IGF1;APOE;ITGB1;L1CAM;LIMK1;MIR195;MAP2;NGF;NRN1;PPARA;SEMA6A;RGS4;BDNF;CXCL12;SLIT3;SOX9;SPP1;SYT1;VEGFA;CXCR4;NRP1;WNT3A;SLIT2;SEMA3E;CDH1	8.18755	5.09e-22
GOBP_EMBRYONIC_ORGAN_MORPHOGENESIS	TSHZ1;YAP1;CTHRC1;OSR2;CTNNB1;DLX5;EDN1;EDNRA;MEGF8;EPHB2;FBN1;FGF9;FGFR2;GATA2;GATA3;GLI1;GLI3;HIF1A;HOXA11;HOXB4;ID2;IHH;KCNQ1;SMAD2;SMAD3;MMP14;NOTCH1;PAX2;PDGFRA;MAPK1;MAPK3;PSEN1;RARB;BMP4;BMP7;SOD1;SOX9;HNF1B;ZEB1;TCF21;TGFB3;TGFBR1;TWIST1;PAX8;WNT3A;HAND2	6.98408	5.21e-22
GOBP_ORGANONITROGEN_COMPOUND_BIOSYNTHETIC_PROCESS	ADA;MIR543;ABCB6;UST;TOB1;EIF1;CEBPA;KHDRBS1;MTCO2P12;PPARGC1A;GALNT6;CCR7;SGPP2;PARP1;CTH;CTNNB1;CYP1B1;DAPK1;DIO2;HBEGF;EGF;EIF4EBP1;ELAVL1;TET3;ENO1;EPO;ERBB2;AKT1;EXTL3;FOXO3;PLCB1;MTOR;GALNT3;GATA3;GATM;GBA;ANG;ANGPT1;GSTM1;GSTP1;HAS1;HIF1A;ACACA;HPRT1;APOA2;IGF1;APOE;CCN1;IL1B;IL4;IL6;IL15;IDO1;INHA;INHBA;EIF3E;ITGA2;ARG1;LGALS4;MIR100;MIR10B;MIR132;MIR145;MIR148A;MIR17;MIR181C;MIR20A;MIR20…	2.89198	5.6e-22
GOBP_POSITIVE_REGULATION_OF_ESTABLISHMENT_OF_PROTEIN_LOCALIZATION	DNM1L;CIB1;CFTR;UCN3;MAPK14;ERBB2;F2RL1;FGA;ANKRD1;GLI3;ANG;GPER1;GSK3B;HIF1A;HLA-DRB1;IFNG;IGF1;IL1A;IL1B;IL13;ITGAM;LEP;SMAD3;TREM2;PPARG;VPS11;MAPK8;PSEN1;PSMD9;PTGS2;SRC;TGFB1;TGFB2;TGFB3;TLR2;TLR4;TNF;TRH;VEGFC;EZR;NR0B2;CASR;IRS2;HYAL2;HDAC3;CDK1;CDH1	6.75899	6.27e-22
GOBP_REGULATION_OF_MEGAKARYOCYTE_DIFFERENTIATION	CIB1;H4-16;GABPA;GATA2;LOX;MYB;PF4;H4C15;H4C9;H4C1;H4C4;H4C6;H4C12;H4C11;H4C3;H4C8;H4C2;H4C5;H4C13;H4C14	41.0772	6.4e-22
GOBP_INTRINSIC_APOPTOTIC_SIGNALING_PATHWAY_IN_RESPONSE_TO_DNA_DAMAGE	BCL2L11;CDKN1A;ERCC6;SIRT1;MSH6;MIF;MLH1;MSH2;MUC1;ATM;ACKR3;BAX;BCL2;BCL2L1;CXCL12;SFRP2;SNAI2;SNAI1;SOD2;BRCA1;BRCA2;TNF;TNFRSF1A;TNFRSF1B;TP53;TPT1;BAG6;CD44;CD74	14.79	6.62e-22
GOBP_HEART_GROWTH	YAP1;PDLIM5;AKAP13;MAPK14;ADRA1A;AGT;DUSP6;S1PR1;EDN1;FGF2;FGF9;FGFR2;GATA6;FOXP1;GLI1;IGF1;RBPJ;MIR195;MIR200B;MIR204;NOTCH1;PPARA;PTEN;RGS4;TGFB2;TGFBR1;WT1;RUNX1;CDK1	14.79	6.62e-22
GOBP_POSITIVE_REGULATION_OF_CELL_MATRIX_ADHESION	CDK6;CIB1;CCR7;CSF1;POLDIP2;GSK3B;ITGB3;KDR;SMAD3;WNT4;ROCK1;CCL21;CCL25;CX3CL1;SDC4;SFRP1;TEK;THY1;UTRN;VEGFA;SKAP1;NRP1;CD36	25.8345	7.47e-22
GOBP_POSITIVE_REGULATION_OF_CHEMOKINE_PRODUCTION	CSF1R;EGR1;AIF1;F2RL1;HIF1A;HMGB1;IFNG;IL1B;IL6;IL7;IL17A;IL18;LGALS9;MIF;ADAM17;TLR2;TLR3;TLR4;TNF;C5;TWIST1;TSLP;IL33;ADIPOQ;CD74	20.6281	7.7e-22
GOBP_POSITIVE_REGULATION_OF_TRANSMEMBRANE_RECEPTOR_PROTEIN_SERINE_THREONINE_KINASE_SIGNALING_PATHWAY	PARP1;FGF9;GATA6;MSTN;CCN1;RBPJ;ILK;INHA;INHBA;KDR;HES5;MIR20A;MIR21;SMAD2;SMAD4;NOTCH1;PPARG;BMP4;BMP7;ADAM17;TGFB1;TGFB1I1;TGFB2;TGFB3;LEFTY2;TGFBR1;THBS1;AXIN1;ACVR1B;ACVR2B;GDF3	12.8431	7.95e-22
GOBP_REGULATION_OF_CELLULAR_MACROMOLECULE_BIOSYNTHETIC_PROCESS	MIR543;TOB1;EIF1;KHDRBS1;CCR7;CTNNB1;CYP1B1;DAPK1;DIO2;HBEGF;EIF4EBP1;ELAVL1;ERBB2;AKT1;FOXO3;PLCB1;MTOR;GBA;ANG;GSK3B;IGF1;IL6;IL15;INSR;EIF3E;ITGA2;MIR100;MIR10B;MIR132;MIR145;MIR148A;MIR17;MIR181C;MIR195;MIR20A;MIR200B;MIR200C;MIR204;MIR205;MIR21;MIR210;MIR27B;MIR29C;MIR31;MLH1;MIR135B;MSI1;YBX1;MIR378A;ENPP1;MIR503;BCL2;ROCK1;MIR483;CCL5;CCL19;CCL21;THBS1;TNF;UCN;VIM;ZFP36;IRS2;IL33	4.76423	8.16e-22
GOBP_NEGATIVE_REGULATION_OF_RESPONSE_TO_WOUNDING	CPB2;CLDN3;CRK;EDN1;F2;FGA;FGF2;ANXA2;APOE;KNG1;MIR200B;MIR34A;SMAD3;MDK;NOS3;SERPINE1;SERPINB2;PDGFA;PDGFRA;PLAU;PLG;WNT4;PTEN;SPP1;THBS1;SERPING1;TNF;VTN	15.7822	8.17e-22
GOBP_FATTY_ACID_METABOLIC_PROCESS	PPARGC1A;CNR1;MAPK14;CYP1A1;CYP1A2;CYP1B1;CYP2B6;CYP2C19;CYP3A4;AKR1C1;AKR1C2;DECR1;EDN1;AKT1;AKR1B1;FMO2;SIRT1;ALOX15;HPGDS;GPX4;GSTM1;GSTM2;GSTP1;ANXA1;ACACA;HPGD;IL1B;LEP;LIPC;CYP4F3;MIR132;MIR204;MIR30C1;MIR33A;MIF;PPARA;PPARG;PTGS2;SOX9;BRCA1;TNFRSF1A;C3;TWIST1;XBP1;AKR1C3;IRS2;ADIPOQ;LIPG;CD36;TECR;PTGES;NCOR1;CD74	5.80826	8.2e-22
GOBP_POSITIVE_REGULATION_OF_INTERLEUKIN_8_PRODUCTION	NOD1;F2R;F2RL1;F3;HMGB1;APOA2;IL1B;IL6;LEP;LGALS9;NOS2;SERPINE1;IL17D;RELA;STAT3;TLR2;TLR3;TLR4;TNF;HYAL2;BCL10;CD14;ADIPOQ;CD74	22.8317	8.31e-22
GOBP_REGULATION_OF_SIGNALING_RECEPTOR_ACTIVITY	CRH;CNIH3;ADRA2B;DAPK1;HBEGF;AGTR2;EDN1;EGF;EPHB2;ESR2;DKK1;FSHB;GREM1;HDAC1;HDAC2;HIF1A;IFNG;IL10;ITGB1;AREG;MUC4;OPRM1;SERPINE1;PLAU;ERRFI1;PPARA;PPARG;PSEN1;CCL2;SHC1;SRC;ADAM17;TNF;CCR2;NRP1	10.305	8.43e-22
GOBP_LEUKOCYTE_ACTIVATION_INVOLVED_IN_INFLAMMATORY_RESPONSE	LRRK2;CX3CR1;AIF1;IFNG;IFNGR1;IL4;IL6;IL13;ITGAM;JUN;MIR142;MIR181C;ATM;TREM2;PTPRC;CX3CL1;TLR2;TLR3;TNF;TYROBP;TRPV1;IL33	29.0936	9.06e-22
GOBP_COLLAGEN_BIOSYNTHETIC_PROCESS	COL1A1;CCN2;F2;F2R;HDAC2;IHH;IL6;INHBA;ITGA2;ARG1;MIR145;PDGFRB;ERRFI1;WNT4;BMP4;TGFB1;TGFB3;UCN;VIM;RUNX1;SERPINH1;CREB3L1	29.0936	9.06e-22
GOBP_POSITIVE_REGULATION_OF_VASCULAR_ASSOCIATED_SMOOTH_MUSCLE_CELL_PROLIFERATION	DNMT1;AGT;EDN1;FGF2;FGF9;GJA1;HPGD;IGF1;IL10;JUN;MIR17;MIR20A;MIR21;MIR214;MIR27B;MMP2;MMP9;MIR135B;P2RY6;SRC;TERT;TNF	29.0936	9.06e-22
GOBP_NEGATIVE_REGULATION_OF_WOUND_HEALING	CPB2;CLDN3;CRK;EDN1;F2;FGA;FGF2;ANXA2;APOE;KNG1;MIR200B;MIR34A;SMAD3;NOS3;SERPINE1;SERPINB2;PDGFA;PDGFRA;PLAU;PLG;WNT4;PTEN;THBS1;SERPING1;TNF;VTN	18.58	9.09e-22
GOBP_T_CELL_DIFFERENTIATION_IN_THYMUS	ADA;RASGRP1;CDK6;CCR7;CTNNB1;ERBB2;GATA3;GBA;GLI3;IHH;IL1A;IL1B;IL7R;FOXP3;WNT4;B2M;PTPRC;BCL2;BMP4;SOD1;BRAF;ADAM17;ZEB1;TP53;FZD7;CARD11;CD74	17.0191	9.16e-22
GOBP_CATION_TRANSMEMBRANE_TRANSPORT	ABCB6;ABCC9;MTCO2P12;SCN11A;PHB2;CLCN3;CCR5;CCR7;CRH;CRHR1;ADRA1A;CCN2;CNIH3;CYB5A;DAPK1;DPP6;DRD2;AGT;EDN1;EDNRA;EPHB2;EPO;F2;F2R;FGF2;NEDD4L;SLC7A8;GPER1;REM1;GSTM2;SLC40A1;ANXA2;IFNG;FASLG;AQP1;IL13;CXCL10;ITGAV;ITGB1;ITGB3;KCNQ1;KCNQ2;ARG1;LHCGR;LYN;MIR200C;MIR21;MIR210;CXCL9;MMP9;NOS1;OPRM1;P2RX3;P2RX5;P2RY6;PIK3CG;TREM2;PSEN1;PTPRC;BAX;BCL2;RGS4;CCL2;CCL19;CCL21;CX3CL1;SLC1A1;WNK1;SLC6A4;SL…	3.7355	1.17e-21
GOBP_TYROSINE_PHOSPHORYLATION_OF_STAT_PROTEIN	CSF1R;CSF2;EPO;GH1;HDAC2;IFNG;IGF1;IL2;IL4;IL6;IL12B;IL13;IL15;IL18;JAK1;HES5;LEP;LIF;LYN;IL23A;PPP2R1A;IL21;CCL5;TNF;TNFRSF1A;VEGFA;TSLP	16.7353	1.29e-21
GOBP_REGULATION_OF_CD4_POSITIVE_ALPHA_BETA_T_CELL_ACTIVATION	CD55;IL27;GATA3;CD274;TBX21;ANXA1;HLA-DRB1;HMGB1;IFNG;IL2;IL2RA;IL4;IL12B;IL12RB1;IL18;LGALS9;MIR21;MYB;FOXP3;IL23A;BCL6;CCL19;CARD11;RUNX1;RUNX3;CD86	18.2293	1.32e-21
GOBP_CELL_MATURATION	CEBPA;CFTR;LRRK2;CTNNB1;EDN1;EDNRA;EPO;ERCC2;FOXO3;AKR1B1;GATA2;GATA3;GBA;GHRHR;ANG;HIF1A;IHH;IL15;KDR;HES5;MECP2;PAEP;PGR;PPARG;PPP2R1A;AXL;IL21;RB1;BCL2;REN;CCL19;CCL21;CX3CL1;BRCA2;BTK;C3;VEGFA	9.23513	1.46e-21
GOBP_B_CELL_MEDIATED_IMMUNITY	CD226;CD55;ERCC1;FCGR3A;MSH6;TBX21;HLA-DPB1;HLA-DQB1;HLA-DRB1;HLA-G;HSPD1;CFI;IL2;IL4;IL9;IL10;LTA;MBL2;MLH1;MSH2;FOXP3;TREM2;B2M;PTPRC;BCL6;STAT6;BTK;TGFB1;SERPING1;TNF;C1R;C3;C5;C9;ZP3;BCL10;CD19;CD40LG;CD74	8.50032	1.57e-21
GOBP_TUBE_FORMATION	BCL2L11;CTHRC1;ADM;CTNNB1;EGF;FGF2;FGFR2;GATA3;GREM1;GDNF;HIF1A;HES5;MIR210;NOTCH1;PAX2;PIK3CD;WNT4;SALL4;BRD2;SDC4;SFRP1;SFRP2;BMP4;BMP7;SOX9;HNF1B;TGFB1;TGFB2;TWIST1;VEGFA;YWHAZ;PAX8;CASP3;BCL10	10.4988	1.92e-21
GOBP_REGULATION_OF_BLOOD_CIRCULATION	ADA;ABCC9;CHRM3;ADM;ADRA1A;CCN2;ADRA2B;ACE;DRD2;AGT;HBEGF;AGTR1;AGTR2;EDN1;EDNRA;F2R;FGA;GJA1;GSTM2;IL2;KCNQ1;LEP;MIR200C;MIR21;MDM2;MMP2;NOS1;NOS3;OXTR;PIK3CG;PTGS2;RGS4;S100A1;SLC1A1;STC1;TACR1;TGFB2;THRA;TNF;UCN;TRPV1;CALCA;CASR	7.34361	2e-21
GOBP_REGULATION_OF_MUSCLE_ADAPTATION	PARP1;ADRA1A;AGT;EDN1;AIF1;FOXO1;FOXO3;FOXP1;IGF1;MIR145;MIR17;MIR20A;MIR21;MIR214;SMAD3;SMAD4;NOS3;NOTCH1;ERRFI1;PPARA;PPARG;PRKCA;RGS4;ROCK1;TNFRSF1A;TNFRSF1B;BECN1;HAND2	15.0953	2.13e-21
GOBP_MUSCLE_ORGAN_DEVELOPMENT	CREB1;MAPK14;CTNNB1;DDX5;HBEGF;S1PR1;EDNRA;EGR1;FGFR2;SIRT1;FOS;MSTN;ANKRD1;NR4A1;IGF1;RBPJ;CXCL10;ITGB1;KRAS;LIF;LOX;MIR143;MIR145;MIR195;SMAD3;SMAD4;NOTCH1;DLL4;MED1;RBFOX1;RB1;BCL2;BMP4;SOX15;TAGLN;TCF21;NR2F2;TGFB1;TGFB2;TGFBR1;TWIST1;UTRN;WT1;XBP1;WNT3A;COPS2;IGSF8;HDAC9;NR1D2	6.20127	2.25e-21
GOBP_BONE_REMODELING	CTHRC1;CSF1R;CSK;CTNNB1;S1PR1;FSHB;GREM1;GJA1;IAPP;IHH;IL6;IL7;ITGB3;LEP;LEPR;MDK;TNFRSF11B;PRKCA;PTN;SFRP1;SPP1;SRC;TGFB1;TGFB3;CALCA;DCSTAMP;RASSF2	16.1952	2.55e-21
GOBP_REGULATION_OF_ALPHA_BETA_T_CELL_DIFFERENTIATION	ADA;IL27;GATA3;GLI3;TBX21;ANXA1;HLA-DRB1;HMGB1;IFNG;IHH;IL2;IL4;IL12B;IL12RB1;IL18;LGALS9;MIR21;MYB;FOXP3;IL23A;BCL6;CCL19;RUNX1;RUNX3;CD86	19.3383	2.56e-21
GOBP_ORGANONITROGEN_COMPOUND_CATABOLIC_PROCESS	ADA;CDKN1B;CEBPA;HPSE;SMPDL3A;LRRK2;COMT;CPB2;CRMP1;CTNNB1;CYP3A4;ACE;DIO2;SARDH;DPYSL2;EGF;EGFR;TET3;AKT1;FGF2;FOXO1;NEDD4L;SIRT1;MTOR;RNF19A;GBA;CCDC22;MYLIP;GSK3B;TBX21;ANXA2;HPRT1;BIRC2;IFI27;IFNG;APOE;IL1B;IL10;IDO1;USP17L2;ARG1;LIPC;MIR21;SMAD3;SMAD4;MAOA;MAOB;MDM2;MME;MMP2;MMP12;ATM;NFE2L2;NOS1;NOS2;NOS3;NOTCH1;NT5E;OGG1;PAPPA;HERC5;PLK1;TREM2;UGT1A1;PPT1;VPS11;PSEN1;PSMD2;PSMD9;PSMD10;PTE…	3.16416	2.8e-21
GOBP_MAMMARY_GLAND_MORPHOGENESIS	PHB2;CSF1;CSF1R;ESR1;FGFR2;GLI3;NR3C1;AR;AREG;ARG1;NFKB1;PGR;WNT4;MED1;BAX;RXFP1;CCL11;BMP4;SRC;STAT6;VDR	31.108	2.91e-21
GOBP_REGULATION_OF_EPITHELIAL_TO_MESENCHYMAL_TRANSITION	COL1A1;CTNNB1;EPHA3;EZH2;MTOR;GATA3;GREM1;HDAC2;FOXA2;IL1B;IL6;MIR21;SMAD2;SMAD3;SMAD4;MDK;NOTCH1;PTEN;SFRP1;SFRP2;BMP4;BMP7;SNAI1;TGFB1;TGFB1I1;TGFB2;TGFB3;TGFBR1;TWIST1	13.8428	2.94e-21
GOBP_EMBRYO_IMPLANTATION	EPO;FBLN1;FKBP4;GJA1;IGFBP7;IL1B;ITGB3;LIF;MIR21;MMP2;MMP9;PRLR;PTGS2;SOD1;SPP1;STC1;BSG;TIMP1;TRO;VEGFA;CALCA;STC2;ACVR1B	23.6843	3.15e-21
GOBP_ION_TRANSMEMBRANE_TRANSPORT	ABCB6;ABCC9;ABCC4;MTCO2P12;CFTR;SCN11A;CHRM3;PHB2;CLCN3;ANO4;CCR5;CCR7;CLDN4;CRH;CRHR1;ADRA1A;CCN2;CNIH3;CYB5A;DAPK1;DPP6;DRD2;AGT;EDN1;EDNRA;EPHB2;EPO;F2;F2R;FGF2;NEDD4L;SLC7A8;GJA1;GPER1;REM1;GSTM2;SLC40A1;ANXA2;IFNG;FASLG;AQP1;IL13;CXCL10;ITGAV;ITGB1;ITGB3;KCNQ1;KCNQ2;ARG1;LHCGR;LYN;MIR200C;MIR21;MIR210;CXCL9;MMP9;NOS1;OPRM1;P2RX3;P2RX5;P2RY6;PIK3CG;TREM2;ANKH;PSEN1;PTPRC;BAX;BCL2;RGS4;S100A6;…	3.38024	3.2e-21
GOBP_REGULATION_OF_NEURAL_PRECURSOR_CELL_PROLIFERATION	LRRK2;CTNNB1;CX3CR1;DRD2;EGF;FGF2;KIFAP3;FOXO1;FOXO3;GATA2;GLI1;GLI3;HIF1A;ID2;ILK;ITGB1;LYN;MDK;NOTCH1;DLL4;PTN;CX3CL1;SLC6A4;TP53;VEGFA;VEGFC;WNT3A	15.9302	3.55e-21
GOBP_SMOOTH_MUSCLE_CELL_DIFFERENTIATION	ADM;CTH;CTNNB1;DNMT1;EDNRA;FGF9;FGFR2;SIRT1;HEY1;GATA6;PDCD4;GPER1;MIR100;MIR145;MIR21;MIR22;MIR34A;MECP2;NOTCH1;WNT4;BMP4;SOD2;SOX9;ZEB1;VEGFA	18.9435	3.77e-21
GOBP_REGULATION_OF_POSITIVE_CHEMOTAXIS	S1PR1;F2RL1;F3;ANGPT2;CXCL8;IL16;ITGA2;KDR;SMAD3;NTF3;NTRK3;PGF;CXCL12;VEGFA;VEGFC;CASR;ARTN	69.5688	4.09e-21
GOBP_BIOLOGICAL_PROCESS_INVOLVED_IN_INTERACTION_WITH_HOST	CCR5;CD55;DPP4;AGTR1;EGFR;HLA-DRB1;HMGB1;HSPD1;ICAM1;IFIT1;CXCL8;INSR;ITGA2;ITGA5;ITGAV;ITGB1;ITGB3;LGALS1;LGALS9;LTF;MRC1;NCAM1;SLC52A1;AXL;PVR;NECTIN1;BCL2L1;SRC;BSG;CXCR4;THOC6;NECTIN4;HYAL2;NRP1;CLDN1;CD86;CD74;CDK1	8.5237	4.63e-21
GOBP_SOMATIC_STEM_CELL_POPULATION_MAINTENANCE	YAP1;ZHX2;GATA2;RBPJ;LIF;MIR145;MYC;PAX2;POU5F1;SALL4;RAF1;SFRP1;BMP7;SOX2;SOX9;BRAF;STAT3;HNF1B;KLF10;WNT7A;PAX8;NANOG;MED14;MED17	20.7067	4.66e-21
GOBP_POSITIVE_REGULATION_OF_NIK_NF_KAPPAB_SIGNALING	NOD1;PHB2;EDN1;EGFR;GREM1;PDCD4;IL1B;IL12B;IL18;ILK;LGALS9;NR3C2;IL23A;TREM2;RELA;CCL19;TLR2;TLR3;TLR4;TNF;ACTN4;IL18R1;CD14;CD86	20.7067	4.66e-21
GOBP_STEROID_HORMONE_BIOSYNTHETIC_PROCESS	ADM;CYP11A1;CYP17A1;CYP19A1;EGR1;AKR1B1;FSHB;HSD3B1;HSD3B2;HSD17B1;HSD17B3;HSD17B2;LHB;HSD17B7;WNT4;MED1;SRD5A1;SRD5A2;TSPO;DHRS11	35.2175	4.75e-21
GOBP_ERYTHROCYTE_HOMEOSTASIS	CDK6;ADAR;MAPK14;EPO;ERCC2;ETS1;FOXO3;GATA2;GATA3;TMOD3;HIF1A;ID2;INHA;INHBA;KCNQ1;ARNT;LYN;MYB;KLF13;MED1;AXL;B2M;RB1;BCL6;BMP4;STAT3;THRA;VEGFA;ZFP36;CASP3;ACVR1B;SFXN1	11.267	4.76e-21
GOBP_MACROPHAGE_MIGRATION	CD200R1;CSF1;CSF1R;IL34;CX3CR1;CYP19A1;MSTN;LGALS3;MDK;MIF;MMP2;MMP14;CD200;TREM2;MAPK1;MAPK3;RARRES2;CCL2;CCL5;CX3CL1;THBS1;C5;CCR2	23.0438	4.98e-21
GOBP_CELL_FATE_SPECIFICATION	CTNNB1;FGF2;DKK1;GLI3;TBX21;HDAC1;HDAC2;FOXA2;HOXA11;HOXA13;RBPJ;IHH;AR;ITGB1;NOTCH1;NTRK3;PAX2;POU5F1;PSEN1;SFRP2;SOX2;SOX9;HNF1B;NANOG;FZD7;NRP1;WNT3A;MTA1;MTA2	13.4966	5.2e-21
GOBP_POSITIVE_REGULATION_OF_MORPHOGENESIS_OF_AN_EPITHELIUM	CTNNB1;AGT;AGTR2;EGF;FGF2;GATA3;GREM1;GDNF;GJA1;AR;LIF;MDK;PAX2;PIK3CD;WNT4;BMP4;SOX9;VEGFA;PAX8	41.2626	6.39e-21
GOBP_SIGNAL_TRANSDUCTION_IN_ABSENCE_OF_LIGAND	BCL2L11;CSF2;AKT1;FOXO3;GDNF;GSK3B;FAS;IL1A;IL1B;IL2;IL4;IL7;INHBA;ITGAV;KITLG;PF4;PPP2R1A;BAX;BCL2;BCL2L1;CX3CL1;SNAI2;TERT;TNF	20.2359	7.02e-21
GOBP_GLIAL_CELL_PROLIFERATION	CSF1;CSF1R;IL34;DICER1;GBA;IL1B;IL6;AREG;KRAS;LEPR;LTA;LYN;MECP2;NOTCH1;TREM2;RB1;CX3CL1;TSPO;TNF;TP53;VEGFC;IL33	25.4579	7.19e-21
GOBP_CELL_DEATH_IN_RESPONSE_TO_OXIDATIVE_STRESS	LRRK2;PARP1;CTNNB1;CYP1B1;AKT1;FOXO3;SIRT1;GBA;FOXP1;HGF;HIF1A;IL10;MIRLET7B;MIR17;MIR195;MIR21;MIR34A;MET;MMP3;NFE2L2;TREM2;BCL2;SLC1A1;SOD1;SOD2;TLR4;TNF;TXN	14.269	7.22e-21
GOBP_REGULATION_OF_NEURON_DIFFERENTIATION	LRRK2;ADRA2B;DPYSL2;EPO;FGF2;ZHX2;DKK1;FOXO3;HEY1;GATA2;GLI3;GSK3B;ID2;ITGB1;HES5;NGF;NOTCH1;NTF3;NTF4;MED1;B2M;BCL2;BCL6;ROCK1;BDNF;CXCL12;SFRP1;SFRP2;BMP4;SLC6A4;BMP7;SOX2;SOX9;TCF3;ZEB1;NCOA1;WNT3A	8.71071	7.94e-21
GOBP_REGULATION_OF_GLIAL_CELL_DIFFERENTIATION	IL34;CTNNB1;F2;DICER1;MTOR;TNFRSF21;HDAC1;HDAC2;ID2;IL6;HES5;LIF;MIR142;MIR181C;MDK;NOTCH1;NTRK3;TREM2;PTN;TGFB1;TLR2;TNFRSF1B;CXCR4;IL33;CDK1	18.2004	8.02e-21
GOBP_REGULATION_OF_STEROID_BIOSYNTHETIC_PROCESS	ADM;EGR1;FGF1;SIRT1;FSHB;NR5A1;NR3C1;IFNG;APOE;IGF1R;IGFBP7;IL1A;LEP;LHCGR;MIR30C1;MIR33A;NFKB1;WNT4;SNAI2;SNAI1;SOD1;STAR;TSPO;TNF;AKR1C3	18.2004	8.02e-21
GOBP_TELOMERE_ORGANIZATION	H4-16;PARP1;CTNNB1;ERCC1;EZH2;FEN1;APEX1;MYC;ATM;PCNA;H4C15;MAPK1;MAPK3;MAP2K7;DCLRE1C;SRC;BRCA2;TERF1;TERT;XRCC1;XRCC3;STN1;H4C9;H4C1;H4C4;H4C6;H4C12;H4C11;H4C3;H4C8;H4C2;H4C5;H4C13;H4C14;CCNE1;CCNE2	9.03803	9.18e-21
GOBP_ANIMAL_ORGAN_FORMATION	CTNNB1;FGF1;FGF2;FGFR2;DKK1;GATA6;GDNF;GLI3;HOXA11;RBPJ;AR;MIR20A;NOTCH1;NTF4;PAX2;MAPK1;MAPK3;MAP2K1;BMP4;BMP7;WT1;PAX8;WNT3A;HAND2	19.786	1.05e-20
GOBP_HEART_PROCESS	ADA;DNM1L;ABCC9;YAP1;AKAP13;ADM;ADRA1A;CCN2;ACE;DRD2;AGT;HBEGF;AGTR2;EDN1;EDNRA;NEDD4L;MTOR;GATA6;GJA1;GSTM2;IL2;KCNQ1;MIR200C;MDM2;NOS1;NOS3;PIK3CA;PIK3CG;RGS4;S100A1;SLC1A1;SOD1;SRC;STC1;TGFB2;THRA;TNF;UCN;TRPV1;CXCR4;CALCA;CDC42	7.19966	1.09e-20
GOBP_REGULATION_OF_CARBOHYDRATE_METABOLIC_PROCESS	PPARGC1A;EGF;AKT1;FOXO1;SIRT1;MTOR;GPER1;NR3C1;GSK3B;HIF1A;FOXA2;IFNG;IGF1;IGFBP3;INSR;LEP;LEPR;LHCGR;ARNT;MIR195;MIR210;MAS1;MST1;NFKB1;P2RY6;ENPP1;PPARA;PSEN1;SRC;STAT3;TFF3;TGFB1;TP53;IRS2;ADIPOQ;NCOR1	8.97758	1.11e-20
GOBP_CELL_CELL_JUNCTION_ORGANIZATION	CLDN4;CLDN3;CLDN7;CSF1R;CSK;CTNNB1;GPBAR1;ACE;AGT;EPHB2;F2R;F2RL1;GJA1;GJB2;IL1B;IL17A;RHOC;MIR142;SMAD3;CLDN11;PRKCA;NECTIN1;ACTB;ROCK1;SNAI2;SNAI1;FSCN1;SRC;TGFB1;TGFB2;TGFB3;TGFBR1;CLDN5;TNF;VEGFA;CLDN1;CDC42;CDH1	8.27516	1.12e-20
GOBP_HETEROTYPIC_CELL_CELL_ADHESION	LILRB2;CD200R1;SIRPA;FGA;IL1B;IL1RN;IL10;ITGA5;ITGAV;ITGB1;ITGB3;CD200;NINJ1;PTPRC;WNK1;BMP7;THY1;TNF;VCAM1;SKAP1;ADIPOQ;CD44;CD47	21.8614	1.21e-20
GOBP_POSITIVE_REGULATION_OF_WOUND_HEALING	HPSE;CPB2;CLDN4;CLDN3;HBEGF;F2;F2R;F3;MTOR;ANXA1;ITGB1;NFE2L2;SERPINE1;PLAU;PLG;MIR451A;SMOC2;THBS1;VTN;XBP1;CXCR4;CLDN1;CD36	21.8614	1.21e-20
GOBP_REGULATION_OF_ORGAN_GROWTH	BCL2L11;YAP1;MAPK14;ARX;DUSP6;EDN1;AKT1;FGF2;FGF9;FGFR2;GATA6;FOXP1;GLI1;IGF1;RBPJ;IL7;MIR200B;MIR204;NOTCH1;PPARA;PTEN;RGS4;SLC6A4;SOD1;TGFBR1;WT1;RUNX1;CDK1	13.8887	1.3e-20
GOBP_CELLULAR_COMPONENT_DISASSEMBLY	DNM1L;CIB1;CFL1;PHB2;CX3CR1;DPP4;F2RL1;DKK1;DICER1;LMOD1;GBA;GPER1;GSK3B;TMOD3;HIF1A;HMGA1;IGF1R;IL6;INSR;ITGAM;STMN1;MMP1;MMP2;MMP3;MMP7;MMP9;MMP12;MMP13;MMP14;MYC;VTA1;PIK3CA;PLG;PLK1;TREM2;PRKCA;PRKCB;BAX;CX3CL1;ATG3;SNAI2;SMARCC1;FSCN1;STX5;TGFB1;TGFB3;TGFBR1;TSPO;TNF;TP53;C3;MAP1LC3B;ARID1A;DENR;BECN1;SQSTM1;CDK1	5.01938	1.32e-20
GOBP_DIGESTIVE_TRACT_MORPHOGENESIS	AGR2;CTNNB1;EGFR;FGFR2;GLI1;GLI3;HIF1A;HOXA13;ID2;IHH;SMAD2;SMAD3;NOTCH1;PDGFRA;BCL2;SFRP1;SFRP2;BMP4;HNF1B;TCF21;ACVR2B	27.7567	1.52e-20
GOBP_POSITIVE_REGULATION_OF_RECEPTOR_SIGNALING_PATHWAY_VIA_STAT	CYP1B1;AGT;F2;F2R;GH1;IL4;IL6;IL7R;IL10;IL12B;HES5;LEP;NOTCH1;IL23A;PRL;PRLR;CCL5;TGFB1;TNF;TYK2;TSLP	27.7567	1.52e-20
GOBP_NEURON_PROJECTION_GUIDANCE	PLXNC1;SEMA3C;CRMP1;CSF1R;ARX;DLX5;DPYSL2;EDN1;EDNRA;MEGF8;EPHA3;EPHB2;EPHB4;ERBB2;PLXND1;GATA3;GDNF;GLI3;L1CAM;RHOG;LAMC2;SMAD4;NCAM1;NGFR;NOTCH1;ROBO4;SEMA6A;NECTIN1;BDNF;CXCL12;BMP7;BMPR1B;SLIT3;BSG;VEGFA;NRP1;WNT3A;ARTN;SLIT2;SEMA3E	7.61534	1.52e-20
GOBP_RESPONSE_TO_ESTROGEN	SRA1;EPO;ESR1;GATA3;GATA6;GBA;MSTN;GHRHR;GLI3;HOXA10;HOXA11;APOA2;AR;MME;MMP2;MMP14;TNFRSF11B;PDGFRB;CCND1;SFRP1;SRD5A1;BRCA1;TGFB3;WNT7A	19.3557	1.56e-20
GOBP_REGULATION_OF_CELL_CYCLE_G1_S_PHASE_TRANSITION	CDKN1A;CDKN1B;CDKN2A;PHB2;CYP1A1;EGFR;AIF1;AKT1;EZH2;PLCB1;GLI1;ANXA1;APEX1;ID2;INHBA;MIR214;MIR29C;MIR30C2;MDM2;MNAT1;MUC1;ATM;PTEN;MIR451A;MIR503;RB1;CCND1;BCL2;ACTB;CCL2;SMARCC1;SOX2;ADAM17;TERT;TFDP1;TP53;ARID1A;CDC6	8.17976	1.58e-20
GOBP_POSITIVE_REGULATION_OF_RESPONSE_TO_BIOTIC_STIMULUS	KLRC4-KLRK1;RASGRP1;CD226;F2RL1;KLRK1;FPR2;CADM1;NCR3;CD274;HCK;HLA-DRB1;HLA-G;HMGB1;HSPD1;IL12B;IL17A;USP17L2;KIR2DL4;ARG1;LYN;SH2D1A;MBL2;MIF;MMP12;PAK1;MED1;PRKCA;PVR;IL21;CCL5;SRC;TLR4;TYROBP;VAV1;NLRC5;CD14	8.85908	1.62e-20
GOBP_REGULATION_OF_ACTOMYOSIN_STRUCTURE_ORGANIZATION	AKAP13;CCN2;S1PR1;EDN1;MTOR;RHOC;STMN1;LIMK1;MIR20A;MIR21;TACSTD2;SMAD3;SMAD4;MET;PAK1;WNT4;PTGER4;ROCK1;SDC4;SFRP1;BRAF;TACR1;TGFB3;TGFBR1;ARHGAP28;NRP1;CD47;CDC42	13.7059	1.73e-20
GOBP_REGULATION_OF_BIOMINERALIZATION	CFTR;OSR2;CCR1;S1PR1;AHSG;HEY1;GREM1;HIF1A;CCN1;LTF;SMAD3;NOS3;NOTCH1;ENPP1;WNT4;ANKH;PTN;ROCK1;RXRA;BMP4;BMP7;BMPR1B;SOX9;TGFB1;TGFB3;TWIST1;VDR;ACVR2B	13.7059	1.73e-20
GOBP_SKIN_EPIDERMIS_DEVELOPMENT	CDH3;FST;HPSE;CTNNB1;DLX3;EGFR;ERCC2;FGFR2;DKK1;GATA6;INTU;HDAC1;HDAC2;RBPJ;INHBA;SMAD4;NGFR;NOTCH1;PDGFA;BCL2;RELA;SNAI1;SOX9;TGFB2;TNF;LGR5;ACVR1B	14.7582	1.74e-20
GOBP_VASCULAR_ENDOTHELIAL_GROWTH_FACTOR_PRODUCTION	HPSE;CYP1B1;HIF1A;IL1A;IL1B;IL6;ARNT;MIR132;MIR17;MIR195;MIR20A;MIR205;MIR34A;MIR378A;SULF2;PTGS2;MIR520G;BRCA1;TGFB1;TNF;C3;C5;CCR2	21.3146	1.85e-20
GOBP_POSITIVE_REGULATION_OF_EPITHELIAL_TO_MESENCHYMAL_TRANSITION	COL1A1;CTNNB1;EZH2;MTOR;HDAC2;IL1B;IL6;MIR21;SMAD2;SMAD3;SMAD4;MDK;NOTCH1;BMP4;BMP7;SNAI1;TGFB1;TGFB1I1;TGFB2;TGFB3;TGFBR1;TWIST1	23.9694	1.88e-20
GOBP_REGULATION_OF_CD4_POSITIVE_ALPHA_BETA_T_CELL_DIFFERENTIATION	IL27;GATA3;TBX21;ANXA1;HLA-DRB1;HMGB1;IFNG;IL2;IL4;IL12B;IL12RB1;IL18;LGALS9;MIR21;MYB;FOXP3;IL23A;BCL6;CCL19;RUNX1;RUNX3;CD86	23.9694	1.88e-20
GOBP_ENDOCRINE_HORMONE_SECRETION	CRH;CRHR1;CYP19A1;AGT;AGTR1;GATA3;GJA1;GNRHR;IL1B;AQP1;INHA;INHBA;KCNQ1;KISS1;LEP;SMAD4;PPARG;RETN;REN;SPP1;TSPO;UCN	23.9694	1.88e-20
GOBP_CHONDROCYTE_DIFFERENTIATION	OSR2;MAPK14;CCN2;CTNNB1;FGF9;GREM1;GLI3;HIF1A;HOXA11;IHH;HES5;SMAD3;MDK;SULF2;RARB;RB1;SFRP2;BMP4;BMPR1B;SNAI2;SOX9;TGFB1;TGFBI;TGFBR1;WNT7A;HMGA2;RUNX1;RUNX3;SERPINH1	12.6988	2.05e-20
GOBP_NEGATIVE_REGULATION_OF_TUMOR_NECROSIS_FACTOR_SUPERFAMILY_CYTOKINE_PRODUCTION	LILRB1;SIRPA;DICER1;PTPN22;IL37;CD274;GSTP1;IGF1;IL4;IL10;LGALS9;LTF;MIR132;MIR195;MIR204;FOXP3;ERRFI1;TREM2;AXL;MIR488;CX3CL1;TSPO;TLR4;TWIST1;ADIPOQ	17.1889	2.37e-20
GOBP_MOLTING_CYCLE	CDH3;FST;HPSE;CTNNB1;DLX3;EGFR;ERCC2;FGFR2;DKK1;INTU;HDAC1;HDAC2;RBPJ;INHBA;SMAD4;NGFR;NOTCH1;PDGFA;PTGS2;BCL2;RELA;SNAI1;SOX9;TERT;TGFB2;TNF;LGR5;ACVR1B;CLOCK	12.5497	2.67e-20
GOBP_REGULATION_OF_MONOOXYGENASE_ACTIVITY	CDH3;NOD1;CNR1;AGTR2;EGFR;AKT1;GDNF;HIF1A;IFNG;APOE;IL1A;IL1B;LEP;MIR132;MIR27B;NFKB1;MIR378A;PIK3CB;S100A1;TERT;TNF;VDR	23.2819	2.98e-20
GOBP_RAS_PROTEIN_SIGNAL_TRANSDUCTION	RASGRP1;CDKN1A;CDKN2A;CFL1;AKAP13;CRK;CSF1;ADRA1A;DNMT1;DOK1;AGTR1;AIF1;EPHB2;EPO;F2R;F2RL1;FGF2;FOXM1;NUP62;IGF1;APOE;ITGB1;JUN;KRAS;RHOG;STMN1;LIMK1;MET;KITLG;NGF;NGFR;NOTCH1;NRAS;PDGFRB;PIK3CB;PIK3CG;RAF1;RASA1;RB1;BCL6;ROCK1;SRC;TGFB2;TP53;NRP1;SQSTM1;GRAP2;CDC42	5.90946	3.27e-20
GOBP_IMPORT_INTO_NUCLEUS	CDKN1A;TXNIP;PHB2;LRRK2;MAPK14;CSE1L;AGT;ELAVL1;AKT1;FGF9;NUP62;GLI3;ANGPT1;IFNG;LEP;SMAD3;MMP12;NFKBIA;NOTCH1;MED1;PSEN1;PTGS2;BMP4;STAT3;TGFB1;TP53;RGPD2;HYAL2;HDAC3;SQSTM1;CD36;IPO13;CDK1;CDH1	9.40737	3.6e-20
GOBP_MACROMOLECULE_CATABOLIC_PROCESS	MIR543;TOB1;CDKN1B;CEBPA;HPSE;LRRK2;CPB2;MAPK14;CTNNB1;DDX5;EGF;EGFR;ELAVL1;AKT1;FEN1;FGF2;ZHX2;FOXO1;NEDD4L;DICER1;SIRT1;MTOR;RNF19A;GBA;GDNF;ANG;CCDC22;MYLIP;GSK3B;TBX21;ANXA2;APEX1;BIRC2;IFI27;IFNG;APOE;IL1B;IL6;IL10;EIF3E;ISG20;USP17L2;SMAD3;SMAD4;MDM2;MLH1;MME;MMP2;MMP12;ATM;NFE2L2;NOS2;NOTCH1;YBX1;PAPPA;HERC5;PLK1;TREM2;PPT1;PRKCA;VPS11;PSEN1;PSMD2;PSMD9;PSMD10;PTEN;BAX;RELA;RNASE3;ROCK1;SK…	3.0775	3.81e-20
GOBP_CELL_DIVISION	KIF20A;CDK4;CDK6;CIB1;ZNRD2;TXNIP;CFL1;CKS1B;DRD2;ERCC2;ESRRB;FGF1;FGF2;FGF9;FGFR2;ITGB3BP;NUP62;POLDIP2;INTU;NR3C1;HOXB4;BIRC5;IGF1R;IL1A;IL1B;RHOC;STMN1;MIR145;MDK;MYC;NOTCH1;YBX1;PDGFA;PGF;PIK3CB;PLK1;POU5F1;PTN;RASA1;RB1;CCND1;BCL2L1;ROCK1;SFRP2;BRCA2;TERF1;TGFB1;TGFB2;TGFB3;VEGFA;VEGFC;WNT7A;HMGA2;FZD7;PROK1;CAT;BECN1;CCNB1;WNT3A;LMLN;CCNE1;CCNE2;CDK1;CDC6;CDC42	4.32014	3.94e-20
GOBP_HEART_VALVE_DEVELOPMENT	HEY1;MTOR;GATA3;CCN1;RBPJ;SMAD4;MDM2;NOS3;NOTCH1;DLL4;RB1;ROCK1;BMP4;SLIT3;SNAI2;SNAI1;SOX9;TGFB1;TGFB2;TNFRSF1A;TNFRSF1B;TWIST1;SLIT2	20.2992	4.26e-20
GOBP_REGULATION_OF_NITRIC_OXIDE_METABOLIC_PROCESS	KLRC4-KLRK1;SIRPA;CX3CR1;AGT;AGTR2;EDN1;AIF1;AKT1;KLRK1;IFNG;IL1B;IL10;INSR;MIR132;SMAD3;PTGS2;SOD2;TSPO;TLR4;TNF;TRPV1;CD36;CD47	20.2992	4.26e-20
GOBP_ENTRY_INTO_HOST	CCR5;CD55;DPP4;AGTR1;EGFR;HLA-DRB1;HMGB1;ICAM1;CXCL8;INSR;ITGA2;ITGA5;ITGAV;ITGB1;ITGB3;LGALS1;LGALS9;MRC1;NCAM1;SLC52A1;AXL;PVR;NECTIN1;SRC;BSG;CXCR4;NECTIN4;HYAL2;NRP1;CLDN1;CD86;CD74;CDK1	9.77605	4.63e-20
GOBP_EYE_MORPHOGENESIS	CTNNB1;EPHB2;FBN1;FGF2;ZHX2;FJX1;NECTIN3;GLI3;HIF1A;IHH;FASLG;AQP1;AQP5;KDR;NOTCH1;NTRK2;PAX2;BAX;NECTIN1;RARB;BCL2;RORB;SLC1A1;BMP4;BMP7;SOX9;STAT3;ZEB1;THY1;TWIST1;VEGFA;BCAR3;PROM1	9.77605	4.63e-20
GOBP_OUTFLOW_TRACT_MORPHOGENESIS	SEMA3C;CTNNB1;EDN1;EDNRA;FGFR2;PLXND1;GATA6;HIF1A;RBPJ;ILK;JUN;MIR17;MIR20A;SMAD4;NOTCH1;SFRP2;BMP4;BMP7;TGFB2;CLDN5;TWIST1;VEGFA;NRP1;HAND2;CDC42	16.5748	4.74e-20
GOBP_POSITIVE_REGULATION_OF_ALPHA_BETA_T_CELL_ACTIVATION	ADA;CD55;PTPN22;GLI3;ANXA1;HLA-DRB1;IFNG;IHH;IL12B;IL12RB1;IL18;LGALS9;MIR21;MYB;FOXP3;IL23A;PTPRC;CCL19;CCR2;TYK2;CARD11;RUNX1;RUNX3;CD86	18.1703	4.87e-20
GOBP_REGULATION_OF_COLLAGEN_METABOLIC_PROCESS	CCN2;F2;F2R;HDAC2;IHH;IL6;INHBA;ITGA2;ITGB1;MIR145;PDGFRB;ERRFI1;WNT4;BMP4;TGFB1;TGFB3;UCN;VIM;RUNX1;CREB3L1	29.5675	5.06e-20
GOBP_POSITIVE_REGULATION_OF_B_CELL_PROLIFERATION	ADA;CDKN1A;FCRL3;EPHB2;IL2;IL4;IL7;IL13;MIF;PRLR;PTPRC;IL21;BCL2;BCL6;BTK;TLR4;CARD11;IRS2;WNT3A;CD74	29.5675	5.06e-20
GOBP_TRANSFORMING_GROWTH_FACTOR_BETA_RECEPTOR_SIGNALING_PATHWAY	PARP1;FBN1;SIRT1;FOS;FSHB;MSTN;AMHR2;HDAC1;HDAC2;HPGD;ITGB1;ITGB8;JUN;LOX;MIR183;MIR21;MIR30A;SMAD2;SMAD3;SMAD4;MIR342;PPARA;PPARG;HTRA1;SRC;STAT3;ADAM17;ZEB1;TGFB1;TGFB1I1;TGFB2;TGFB3;TGFBR1;THBS1;CLDN5;TP53;TET1;AXIN1	7.81924	6.03e-20
GOBP_ACTIN_FILAMENT_ORGANIZATION	CFL1;CCR7;CSF3;CCN2;S1PR1;AIF1;F2RL1;ALOX15;MTOR;LMOD1;ANG;TMOD3;HCK;ITGB1;RHOC;RHOG;STMN1;LIMK1;MIR20A;MIR21;MIR214;TACSTD2;SMAD3;MET;PAK1;PIK3CA;WNT4;RHOF;PTGER4;RASA1;BCL2;RGS4;ROCK1;CCL11;CCL21;CX3CL1;SDC4;CXCL12;SFRP1;FSCN1;SRC;BRAF;TACR1;TGFB3;TGFBR1;TPM3;EZR;ARHGAP28;CALD1;ACTN1;NRP1;SLIT2;CD47;CDC42	5.10208	6.56e-20
GOBP_POSITIVE_REGULATION_OF_PHAGOCYTOSIS	SIRPA;AHSG;F2RL1;FPR2;GATA2;APOA2;IFNG;IL1B;IL2RB;IL15;ITGA2;MIR17;MIR183;MIR20A;MBL2;TREM2;PTPRC;CCL2;SOD1;BTK;TNF;C3;CD36;CD47	17.8068	7.03e-20
GOBP_NEURAL_PRECURSOR_CELL_PROLIFERATION	LRRK2;CTNNB1;CX3CR1;ARX;DRD2;EGF;EMX2;FGF2;FGFR2;KIFAP3;FOXO1;FOXO3;GATA2;GLI1;GLI3;HIF1A;ID2;ILK;ITGB1;LYN;MDK;NOTCH1;DLL4;PTN;CX3CL1;SLC6A4;TP53;VEGFA;VEGFC;WNT7A;WNT3A;ARTN	10.1131	7.08e-20
GOBP_CELLULAR_RESPONSE_TO_ALCOHOL	CDK4;CFTR;CREB1;CTNNB1;CYP1B1;ACE;AKR1C2;DNMT3A;AHR;AKT1;FOXO3;FOS;ACACA;IGF1R;INHBA;MIR342;P2RY6;UGT1A1;PTGER2;PTGER4;PTGFR;SFRP1;SOD2;BRCA1;KLF9;AKR1C3;CDH1	13.7483	7.66e-20
GOBP_POSITIVE_REGULATION_OF_PEPTIDASE_ACTIVITY	PDCD6;BCL2L11;NOD1;CLDN4;CLDN3;CCN2;DAPK1;F2R;F3;FBLN1;FN1;SIRT1;GPER1;HMGB1;HSPD1;CCN1;FAS;FASLG;LGALS9;LYN;MIR17;MIR205;MIR21;MIR27B;SMAD3;MYC;NGFR;PPARG;BAX;SFRP2;SLC1A1;STAT3;TNF;TNFSF10;BCL10;WNT3A	8.36239	8.23e-20
GOBP_RESPONSE_TO_FIBROBLAST_GROWTH_FACTOR	CXCL13;COL1A1;CCN2;CTNNB1;FGF1;FGF2;FGF9;FGFR2;GALNT3;GATA3;NR4A1;CXCL8;NGFR;WNT4;DLL4;SULF2;MIR503;CCL2;CCL5;SMOC2;SFRP1;TDGF1;THBS1;ZFP36;NDNF;CASR;HYAL2;CREB3L1;CD44	11.8628	9.62e-20
GOBP_POSITIVE_REGULATION_OF_ION_TRANSMEMBRANE_TRANSPORT	CFTR;AGT;EDN1;EDNRA;EPHB2;F2;F2R;GPER1;GSTM2;IFNG;IL13;CXCL10;ITGB1;KCNQ1;LHCGR;MIR21;MIR210;CXCL9;NOS1;P2RX3;P2RX5;P2RY6;TREM2;PSEN1;BAX;CCL2;CX3CL1;WNK1;THY1;TRPC6;CCR2;ACTN4;SLC38A1;CD19;MS4A1	8.6626	9.93e-20
GOBP_REGULATION_OF_STEM_CELL_PROLIFERATION	YAP1;CEBPA;OSR2;CTNNB1;ACE;FBLN1;FGF2;FGF9;GJA1;GLI3;RBPJ;KDR;EPCAM;KITLG;NOTCH1;PTPRC;RARB;SNAI2;SOX9;TERT;TP53;VEGFC;NANOG;HMGA2;IRS2;CCNE1	14.6305	1.03e-19
GOBP_RESPONSE_TO_CADMIUM_ION	ABCB6;CDKN1B;CHUK;CYP1A2;EGFR;ERCC1;AKT1;FOS;JUN;ARG1;MMP9;OGG1;PCNA;MAPK1;MAPK3;MAPK8;SOD1;SOD2;TERT;CAT;AKR1C3;CDK1	21.4429	1.12e-19
GOBP_SKELETAL_SYSTEM_MORPHOGENESIS	CDX1;OSR2;COL1A1;MAPK14;CCN2;CTNNB1;DLX5;MEGF8;FGFR2;GREM1;GLI3;HOXA11;HOXB4;IHH;LTF;SMAD2;SMAD3;MMP2;MMP13;MMP14;PDGFRA;PSEN1;RARB;SFRP1;BMP4;BMP7;BMPR1B;SOX9;STC1;ZEB1;TGFB3;TGFBR1;THRA;TWIST1;WNT7A;HYAL2;SERPINH1;ACVR2B	7.60964	1.35e-19
GOBP_REGULATION_OF_STEROID_METABOLIC_PROCESS	ADM;TTC39B;EGR1;FGF1;SIRT1;FSHB;NR5A1;NR3C1;IFNG;APOE;IGF1R;IGFBP7;IL1A;LEP;LHCGR;MIR30C1;MIR33A;NFKB1;WNT4;UGT1A1;SNAI2;SNAI1;SOD1;STAR;TSPO;TNF;AKR1C3	13.3814	1.35e-19
GOBP_LIPID_EXPORT_FROM_CELL	ABCC4;CRH;CRHR1;CYP19A1;AGT;AGTR1;EDN1;IL1A;IL1B;INHBA;KCNQ1;LEP;MIF;NOS2;RETN;PTGS2;REN;SPP1;TSPO;PTGES	27.3918	1.48e-19
GOBP_ALCOHOL_METABOLIC_PROCESS	CEBPA;CETP;CFTR;CYP2R1;SGPP2;CYP1A1;CYP1A2;CYP1B1;CYP3A4;TTC39B;CYP11A1;AKR1C1;AKR1C2;FGF1;FGF2;AKR1B1;PLCB1;GBA;GPER1;HSD11B2;APOA2;IGF1;APOE;IL4;IMPA2;LBR;LEP;LEPR;LHCGR;LIPC;LIPE;MIR30C1;MAS1;MECP2;NFKB1;P2RY6;HSD17B7;WNT4;PON1;PTEN;SOD1;STAR;SULT1E1;SULT1A1;SULT2A1;NR0B2;CAT;AKR1C3	5.66772	1.5e-19
GOBP_SEMI_LUNAR_VALVE_DEVELOPMENT	HEY1;GATA3;RBPJ;NOS3;NOTCH1;DLL4;RB1;ROCK1;BMP4;SLIT3;SNAI2;SNAI1;SOX9;TGFB1;TGFB2;TNFRSF1A;TNFRSF1B;TWIST1;SLIT2	31.9155	1.6e-19
GOBP_EXTRINSIC_APOPTOTIC_SIGNALING_PATHWAY_VIA_DEATH_DOMAIN_RECEPTORS	DAPK1;FGA;GSK3B;HGF;ICAM1;FASLG;LGALS3;NGF;NOS3;SERPINE1;PTEN;BAX;RAF1;BCL2;BCL2L1;SFRP1;SFRP2;BMPR1B;BRCA1;THBS1;TIMP3;TNF;TNFRSF1A;RNF34;PEA15	15.4616	1.78e-19
GOBP_CARBOHYDRATE_DERIVATIVE_METABOLIC_PROCESS	ADA;DNM1L;UST;MTCO2P12;HPSE;PPARGC1A;GALNT6;LRRK2;CCR7;PARP1;CTNNB1;DCN;AKR1C1;AKR1C2;HBEGF;EDNRA;EGF;TET3;ENO1;EXTL3;FGF2;AKR1B1;PLCB1;MTOR;GALNT3;GALT;GBA;ANGPT1;HAS1;HIF1A;HK1;ACACA;HPRT1;IFNG;IGF1;IHH;IL1B;IL4;IL15;INSR;ITGB8;LEP;ARNT;MIR17;MIR20A;MIR31;MMP12;NFKB1;NME1;NT5E;OGG1;PDGFRB;ENPP1;ENPP3;TREM2;PPARA;PPT1;ST6GALNAC1;SULF2;PSEN1;BAX;BCL2;CCL19;CCL21;GORASP1;SLC2A4;BMPR1B;STAT3;SULT1E…	3.30452	1.84e-19
GOBP_HEMATOPOIETIC_PROGENITOR_CELL_DIFFERENTIATION	CDK6;ADAR;FST;CSF1R;ACE;ERCC2;FLT1;GATA2;GATA3;HOXB4;INHBA;KDR;HES5;LYN;KITLG;MYB;NFE2L2;NOTCH1;PDGFRA;MED1;PSEN1;PTPRC;BCL2;SFRP1;BMP4;BRAF;TGFB1;TP53;ZFP36;HYAL2	10.8474	1.87e-19
GOBP_ACTIN_FILAMENT_BUNDLE_ORGANIZATION	CCN2;S1PR1;AIF1;MTOR;ITGB1;RHOC;STMN1;LIMK1;MIR20A;MIR21;TACSTD2;SMAD3;MET;PAK1;WNT4;PTGER4;ROCK1;CX3CL1;SDC4;SFRP1;FSCN1;SRC;BRAF;TACR1;TGFB3;TGFBR1;EZR;ARHGAP28;CALD1;ACTN1;NRP1;CD47;CDC42	9.26019	1.89e-19
GOBP_REGULATION_OF_MITOTIC_CELL_CYCLE_PHASE_TRANSITION	CDK4;CDKN1A;CDKN1B;CDKN2A;PHB2;CYP1A1;DUSP1;EGFR;AIF1;ERCC2;AKT1;EZH2;PLCB1;TMOD3;ANXA1;APEX1;BIRC5;ID2;INHBA;MIR195;MIR214;MIR29C;MIR30C2;MDM2;MECP2;MNAT1;MUC1;ATM;PLK1;PTEN;MIR451A;RB1;CCND1;BCL2;ACTB;CCL2;SMARCC1;BRCA1;ADAM17;TERT;TFDP1;TP53;XRCC3;ARID1A;CCNB1;CDK1;CDC6	5.76237	1.93e-19
GOBP_APPENDAGE_DEVELOPMENT	BCL2L11;SEMA3C;OSR2;CRABP2;CTNNB1;DLX5;MEGF8;FGF9;FGFR2;DKK1;GREM1;INTU;GLI3;HDAC1;HDAC2;HOXA10;HOXA11;HOXA13;IHH;SMAD4;NOTCH1;MED1;PSEN1;SALL4;BAX;RARB;SFRP2;BMP4;BMP7;SOX9;TGFB2;TWIST1;WNT7A;HAND2	8.81768	2.02e-19
GOBP_REGULATION_OF_TRANSPORTER_ACTIVITY	ABCC9;CFTR;CHRM3;PHB2;CRH;CRHR1;CNIH3;DAPK1;DRD2;EDN1;EDNRA;EPHB2;EPO;NEDD4L;REM1;GSTM2;APOA2;IFNG;ITGB1;KCNQ1;MIR17;MIR200C;MIR30C1;MIR33A;MIR34A;MMP9;NOS1;OPRM1;P2RY6;TREM2;PON1;PPARG;MIR451A;BCL2;ACTB;RXRA;CCL2;WNK1;MIR33B;TRPC6;TWIST1;CCR2;UTRN;ACTN4;ADIPOQ	6.04194	2.14e-19
GOBP_POSITIVE_REGULATION_OF_CELLULAR_CATABOLIC_PROCESS	MIR543;BCL2L11;TOB1;NOD1;CEBPA;LRRK2;DAPK1;DCN;EGF;AKT1;FOXO1;FOXO3;SIRT1;SH3BP4;MTOR;RNF19A;GBA;CCDC22;GSK3B;HIF1A;HMGB1;IFNG;IGF1;APOE;IL1B;IL4;IL6;INSR;KDR;ARNT;MDM2;MLH1;ATM;NFE2L2;YBX1;PIK3CB;PLK1;PPARA;MAPK3;PSEN1;PSMD10;PTEN;BAX;ROCK1;TNF;TNFRSF1B;TWIST1;ZFP36;AXIN1;IRS2;BECN1;IL33	5.1375	2.32e-19
GOBP_PLATELET_ACTIVATION	MYL9;MAPK14;ADRA2B;F2;F2R;FGA;FN1;APOE;IL6;ILK;ITGB3;LYN;NOS3;PDGFA;PDGFRA;PF4;PF4V1;PIK3CA;PIK3CB;PIK3CG;PRKCA;AXL;ACTB;SRC;TLR4;VAV1;VWF;ACTN1;WNT3A;CD40LG	10.7432	2.35e-19
GOBP_REGULATION_OF_RESPONSE_TO_CYTOKINE_STIMULUS	ADAR;CSF1;EDN1;F2RL1;ANGPT1;GSTP1;HIF1A;TICAM2;IL1R1;IL1RN;IL6;IL7;ARG1;MIR21;MIR27B;MMP12;TREM2;PPARG;MED1;AXL;PTPRC;CCL5;SLIT3;ADAM17;TLR2;TLR4;TNFRSF1A;IL1R2;CXCR4;NLRC5;TSLP;SLIT2;ADIPOQ;CD74	8.75669	2.43e-19
GOBP_REGULATION_OF_AXONOGENESIS	UST;PLXNC1;SEMA3C;CRABP2;MEGF8;EPHB2;PLXND1;FN1;LPAR3;GSK3B;L1CAM;LIMK1;MAP2;NGF;NTRK2;PAK1;MAP2K1;PSEN1;PTEN;SEMA6A;BDNF;CXCL12;SPP1;BRAF;THY1;VEGFA;WNT7A;NRP1;WNT3A;SLIT2;SEMA3E;CDH1	9.62304	2.47e-19
GOBP_PROTEIN_LOCALIZATION_TO_CENP_A_CONTAINING_CHROMATIN	H4-16;H4C15;H4C9;H4C1;H4C4;H4C6;H4C12;H4C11;H4C3;H4C8;H4C2;H4C5;H4C13;H4C14	128.578	2.47e-19
GOBP_CARDIAC_MUSCLE_CELL_DIFFERENTIATION	PDLIM5;AKAP13;ADRA1A;AGT;EDN1;DKK1;MTOR;GATA6;GREM1;FOXP1;IGF1;RBPJ;ITGB1;MIR195;MIR200B;MIR204;SMAD4;PDGFRA;PDGFRB;PPARA;RARB;RGS4;BMP4;TGFB1;VEGFA;WT1;FZD7;WNT3A;CDK1	11.3648	2.56e-19
GOBP_UNSATURATED_FATTY_ACID_METABOLIC_PROCESS	CYP1A1;CYP1A2;CYP1B1;CYP2B6;CYP2C19;AKR1C1;AKR1C2;EDN1;AKR1B1;SIRT1;ALOX15;HPGDS;GPX4;GSTM1;GSTM2;GSTP1;ANXA1;HPGD;IL1B;CYP4F3;MIR132;MIR204;MIF;PTGS2;TNFRSF1A;AKR1C3;PTGES;CD74	12.1103	2.58e-19
GOBP_ACTOMYOSIN_STRUCTURE_ORGANIZATION	MYL9;AKAP13;CCN2;S1PR1;EDN1;MTOR;LMOD1;ANKRD1;TMOD3;ITGB1;RHOC;STMN1;LIMK1;MIR20A;MIR21;TACSTD2;SMAD3;SMAD4;MET;PAK1;PDGFRA;PDGFRB;WNT4;PTGER4;ROCK1;SDC4;SFRP1;SRC;BRAF;TACR1;TGFB3;TGFBR1;ARHGAP28;NRP1;CD47;CDC42	8.01304	2.74e-19
GOBP_NATURAL_KILLER_CELL_MEDIATED_IMMUNITY	KLRC4-KLRK1;RASGRP1;CD226;LILRB1;CRK;FCGR3A;KLRK1;CADM1;NCR3;HLA-B;HLA-G;IL12B;IL18;KIR2DL4;KIR3DL1;KLRC1;LEP;LGALS9;SH2D1A;PVR;IL21;VAV1;ULBP3;ULBP2	16.4875	2.86e-19
GOBP_POSITIVE_REGULATION_OF_APOPTOTIC_SIGNALING_PATHWAY	BCL2L11;DNM1L;AGT;AGTR2;SIRT1;GPER1;PDIA3;FAS;INHBA;MIR210;MIR27B;MYC;NGFR;PPP2R1A;PTEN;PTPRC;BAX;SFRP1;BMPR1B;SOD1;TGFBR1;THBS1;TIMP3;TNF;TP53;BECN1;PEA15;HYAL2;TNFSF10;BCL10	10.641	2.94e-19
GOBP_RESPONSE_TO_ACTIVITY	PPARGC1A;AGT;EDN1;FOS;MSTN;ANGPT2;HIF1A;IL6;IL10;ITGA2;ITGB3;LEP;MAS1;MMP2;PIK3CA;SOD2;SRD5A1;ZEB1;TNF;CXCR4;CAT;ADIPOQ;CDK1	18.1391	2.96e-19
GOBP_REGULATION_OF_RESPONSE_TO_OXIDATIVE_STRESS	LRRK2;PARP1;CTNNB1;AKT1;FOXO3;SIRT1;FOXP1;HGF;HIF1A;IL10;MIRLET7B;MIR132;MIR17;MIR195;MIR21;MIR34A;MET;MMP3;NFE2L2;TREM2;BMP7;SOD1;SOD2;TLR4;TNF;TXN;CD36	12.8648	3.08e-19
GOBP_RESPONSE_TO_HEAT	PDCD6;CPB2;AKT1;FGF1;SIRT1;MTOR;MSTN;GSK3B;HDAC2;IGF1;IGFBP7;IL1A;CXCL10;LYN;ATM;NOS1;NOS3;P2RX3;MAP2K7;PTGS2;CXCL12;SOD1;SST;TACR1;THBS1;TRPV1;CALCA;CD14	11.9708	3.32e-19
GOBP_ANTIGEN_RECEPTOR_MEDIATED_SIGNALING_PATHWAY	ADA;KHDRBS1;CD226;FCRL3;CCR7;CSK;CTLA4;PTPN22;GATA3;FOXP1;TNFRSF21;HLA-DPB1;HLA-DQB1;HLA-DRB1;LGALS3;LYN;SH2D1A;MIR34A;FOXP3;PIK3CA;PIK3CD;PRKCB;MAPK1;PSEN1;PTPRC;BAX;BCL2;RELA;WNK1;BRAF;BTK;THY1;EZR;CARD11;SKAP1;BCL10;CD19;MS4A1;CD79A	7.12538	3.33e-19
GOBP_REGULATION_OF_B_CELL_APOPTOTIC_PROCESS	ADA;FOXP1;IL2;IL10;LYN;MIF;PDCD1;PTEN;BAX;BCL2;BCL6;BTK;IRS2;BCL10;CD74	78.8528	3.37e-19
GOBP_LYMPHOCYTE_CHEMOTAXIS	KLRC4-KLRK1;CXCL13;KLRK1;CXCL10;PIK3CD;PIK3CG;CXCL16;CCL1;CCL2;CCL5;CCL11;CCL14;CCL16;CCL17;CCL19;CCL21;CCL22;CCL25;CX3CL1;WNK1;ADAM17;CCR2	19.8733	3.87e-19
GOBP_REGULATION_OF_CELL_ADHESION_MEDIATED_BY_INTEGRIN	ADA;CIB1;CXCL13;CRK;CYP1B1;DPP4;ITGB3;LIF;LYN;MUC1;SERPINE1;PIK3CG;PLAU;CCL5;CCL21;SFRP2;WNK1;SNAI2;TGFB2;SKAP1	25.4946	4.08e-19
GOBP_DENDRITIC_CELL_DIFFERENTIATION	LILRB2;LILRB1;CCR7;CSF2;F2RL1;HLA-B;HLA-G;HMGB1;RBPJ;IL4;ITGB8;LGALS1;LGALS3;LGALS9;LYN;TREM2;AXL;PSEN1;CCL19;DCSTAMP	25.4946	4.08e-19
GOBP_REGULATION_OF_RECEPTOR_MEDIATED_ENDOCYTOSIS	DRD2;EGF;DKK1;GREM1;GH1;ANGPT1;ANXA2;IL4;INSR;ITGAV;ITGB3;MIR17;MIR205;MIR27B;NTF3;SERPINE1;PIK3CB;PPT1;PSEN1;B2M;CCL19;CCL21;SELE;C3;VEGFA;VTN;WNT3A;ADIPOQ	11.8345	4.27e-19
GOBP_SMALL_GTPASE_MEDIATED_SIGNAL_TRANSDUCTION	RASGRP1;CDKN1A;CDKN2A;CFL1;AKAP13;CRK;DOCK11;CSF1;ADRA1A;DNMT1;DOK1;AGTR1;AIF1;EPHB2;EPO;F2R;F2RL1;FGF2;FOXM1;NUP62;IGF1;APOE;ITGAV;ITGB1;JUN;KRAS;RHOC;RHOG;STMN1;LIMK1;MET;KITLG;NGF;NGFR;NOTCH1;NRAS;PDGFRB;PIK3CB;PIK3CG;RHOF;RAF1;RASA1;RB1;BCL6;ROCK1;SRC;TGFB2;TP53;VAV1;ARHGAP28;BCAR3;NRP1;SQSTM1;SLIT2;GRAP2;CDC42	4.69591	4.34e-19
GOBP_FEMALE_GAMETE_GENERATION	CTNNB1;EDN1;EDNRA;ERCC1;FOXO3;SIRT1;FSHB;FSHR;AMH;ANG;HPGD;IGF1;IHH;INHBA;LEP;MDK;MLH1;MMP2;ATM;NOS3;PGR;PLK1;WNT4;PPP2R1A;PTGS2;PTN;BCL2;BMPR1B;SRC;BRCA2;ZP3;LGR5	9.39676	4.51e-19
GOBP_ORGANIC_CYCLIC_COMPOUND_CATABOLIC_PROCESS	ADA;MIR543;TOB1;SMPDL3A;COMT;CRMP1;MAPK14;CYP1A1;CYP1A2;CYP3A4;CYP19A1;DDX5;DIO2;DPYSL2;ELAVL1;TET3;AKT1;FEN1;ZHX2;DICER1;GALT;GDNF;ANG;HPRT1;APEX1;APOE;IL6;IDO1;EIF3E;ISG20;STS;MAOA;MAOB;MLH1;ATM;NFE2L2;YBX1;NT5E;OGG1;ENPP1;ENPP3;UGT1A1;PRKCA;BAX;RNASE3;ROCK1;SPP1;SRD5A1;SRD5A2;SULT1E1;TNFRSF1B;VIM;VIP;ZFP36;TET1;SUCLG2;ENTPD1	4.60772	4.68e-19
GOBP_NEGATIVE_REGULATION_OF_ENDOTHELIAL_CELL_APOPTOTIC_PROCESS	PAK4;FGA;GATA2;GATA3;ANGPT1;ICAM1;IL4;IL10;IL11;IL13;KDR;MIR126;NFE2L2;SERPINE1;BRAF;TEK;TERT;NDNF	34.9726	4.74e-19
GOBP_RESPONSE_TO_DEXAMETHASONE	CYP1B1;ACE;EDN1;EPO;FOXO3;GBA;MSTN;GJB2;NR3C1;IGF1R;AQP1;ARG1;PAPPA;PCNA;SERPINF1;PIK3CA;ERRFI1;SRD5A1;CLDN1	29.2385	4.98e-19
GOBP_NOTCH_SIGNALING_PATHWAY	CDK6;CDKN1B;YAP1;CEBPA;POSTN;CFD;AKT1;HEY1;GATA2;RBPJ;IL2RA;IL17A;HES5;MIR126;MECP2;MMP14;NFKBIA;NOS3;NOTCH1;NOTCH4;DLL4;PSEN1;BCL6;BMP7;SNAI2;SNAI1;SOX9;SRC;STAT3;ADAM17;HNF1B;TGFB2;TIMP4;NR0B2	8.52095	5.04e-19
GOBP_ARTERY_DEVELOPMENT	EDN1;EDNRA;PLXND1;HEY1;GLI3;HOXA13;HPGD;APOE;RBPJ;LEP;LOX;LOXL1;MIR143;MIR145;MIR205;MDK;NGFR;NOTCH1;PDGFRB;DLL4;BMP4;TGFB2;TGFBR1;VEGFA;NRP1;ACVR2B;HAND2	12.5399	5.26e-19
GOBP_POSITIVE_REGULATION_OF_CYTOKINE_PRODUCTION_INVOLVED_IN_IMMUNE_RESPONSE	NOD1;CD226;LILRB1;CD55;F2RL1;SIRT1;GATA3;TBX21;HK1;HLA-G;IL1B;IL1R1;IL4;IL6;IL18;KIR2DL4;MIF;B2M;TLR3;TLR4;IL18R1;BCL10;CD36;CD74	15.8906	5.58e-19
GOBP_REGULATION_OF_OXIDATIVE_STRESS_INDUCED_CELL_DEATH	LRRK2;PARP1;CTNNB1;AKT1;FOXO3;SIRT1;FOXP1;HGF;HIF1A;IL10;MIRLET7B;MIR17;MIR195;MIR21;MIR34A;MET;MMP3;NFE2L2;TREM2;SOD1;SOD2;TLR4;TNF;TXN	15.8906	5.58e-19
GOBP_CELLULAR_RESPONSE_TO_CORTICOSTEROID_STIMULUS	BCL2L11;CYP1B1;ACE;EDN1;FOXO3;MSTN;GJB2;GPER1;NR3C1;ANXA1;IGF1R;AQP1;ARG1;SERPINF1;ERRFI1;UGT1A1;SRD5A1;SSTR4;STC1;KLF9;ZFP36;AKR1C3	19.4	5.74e-19
GOBP_ADENYLATE_CYCLASE_MODULATING_G_PROTEIN_COUPLED_RECEPTOR_SIGNALING_PATHWAY	AKAP13;CHRM3;UCN3;CNR1;ADM;CRHR1;CRHR2;ADRA1A;ADRA2B;DRD2;S1PR1;EDN1;EDNRA;LPAR3;FPR1;FPR2;FSHR;GHRH;GHRHR;GPER1;IAPP;CXCL10;ITGB3;LHCGR;CXCL9;OPRM1;PF4;PRKCA;PTGER2;PTGER4;PTGFR;RXFP1;SSTR4;VIP;CALCA;CASR;UCN2;LPAR2;S1PR2	6.98871	5.99e-19
GOBP_NEGATIVE_REGULATION_OF_CELLULAR_CATABOLIC_PROCESS	TOB1;LRRK2;CNR1;MAPK14;ADRA1A;ELAVL1;AKT1;MTOR;POLDIP2;PTPN22;GDNF;ANXA2;HGF;HP;IL10;LEP;LEPR;MIRLET7B;MIR21;MET;YBX1;PIK3CA;PIK3CG;TREM2;PSEN1;BCL2;ROCK1;SMARCC1;STAT3;TSPO;TIMP1;TIMP2;TIMP3;TIMP4;TP53;VIP;ZFP36;BAG6;BECN1	6.98871	5.99e-19
GOBP_NEGATIVE_REGULATION_OF_ORGANELLE_ORGANIZATION	LILRB2;YAP1;CIB1;PRRT2;LRRK2;PARP1;DUSP1;S1PR1;ERCC1;AKT1;FKBP4;LMOD1;TMOD3;HGF;BIRC5;IAPP;IGF1;STMN1;LIF;MIR20A;MIR21;MIR214;TACSTD2;SMAD4;MAP2;MET;MNAT1;ATM;PIK3CA;PLK1;PPARG;PSMD10;BCL2L1;BMP4;BMP7;SRC;BRCA1;TERF1;TSPO;TP53;XRCC1;XRCC3;ARHGAP28;STN1;BECN1;CCNB1;SLIT2	5.57837	6.08e-19
GOBP_B_CELL_APOPTOTIC_PROCESS	ADA;FOXP1;TNFRSF21;IL2;IL10;LYN;MIF;PDCD1;PTEN;BAX;BCL2;BCL6;BTK;IRS2;BCL10;CD74	53.6059	6.16e-19
GOBP_ANION_TRANSPORT	ABCC9;ABCC4;CFTR;CLCN3;ANO4;SLCO6A1;CLDN4;ACE;AKR1C1;DRD2;AGT;EDN1;SLC7A8;GJA1;ANXA1;IL1A;IL1B;AQP9;ITGB1;KCNQ1;ARG1;LEP;LHCGR;MIR33A;MIF;NOS2;NTRK2;P2RY6;ENPP1;ENPP3;PLA2G2A;SLC52A1;ANKH;PSEN1;PTGS2;RGS4;SLC1A1;SLC2A1;SLC2A3;SLC20A1;SSTR4;STC1;TSPO;TNF;TRH;TRPV1;CA2;SLC38A1;NR0B2;CASR;SLC16A6;SLC33A1;SFXN1;CD36;PTGES;CD47	4.65449	6.24e-19
GOBP_REGULATION_OF_MACROPHAGE_DERIVED_FOAM_CELL_DIFFERENTIATION	CETP;CRP;CSF1;CSF2;AGT;AGTR1;IL18;ITGAV;ITGB3;NFKB1;NFKBIA;PF4;PLA2G2A;PPARA;PPARG;ADIPOQ;CD36	41.776	6.37e-19
GOBP_RENAL_SYSTEM_VASCULATURE_DEVELOPMENT	EDNRA;EGR1;ANGPT1;ANGPT2;AQP1;ITGB3;NOTCH1;PDGFA;PDGFRA;PDGFRB;ACTA2;BMP4;BMP7;TCF21;TEK;WT1;NRP1	41.776	6.37e-19
GOBP_RESPONSE_TO_GAMMA_RADIATION	CDKN1A;YAP1;PARP1;EGR1;ERCC6;FANCD2;GATA3;H2AX;IL1A;CXCL10;MIR21;MDM2;MYC;ATM;PTPRC;BAX;BCL2;BCL2L1;SOD2;BRCA2;TP53	21.5873	6.76e-19
GOBP_T_CELL_APOPTOTIC_PROCESS	ADA;BCL2L11;AKT1;KIFAP3;GLI3;CD274;HIF1A;FAS;IL2RA;FASLG;IL7R;IDO1;LGALS3;LGALS9;PDCD1;BAX;BCL2;CCL5;BMP4;TP53;BCL10	21.5873	6.76e-19
GOBP_NEGATIVE_REGULATION_OF_SMALL_MOLECULE_METABOLIC_PROCESS	CNR1;PARP1;AKT1;FMO2;SIRT1;APOE;LEPR;MIR132;MIR204;MIR21;MIR30C1;MIR33A;MST1;NFKB1;WNT4;PPARA;SNAI2;SNAI1;SOD1;SOX9;BRCA1;STAT3;TSPO;TP53;AKR1C3;ADIPOQ;NCOR1	12.3891	6.83e-19
GOBP_REGULATION_OF_ACTIN_FILAMENT_ORGANIZATION	CCR7;CSF3;CCN2;S1PR1;F2RL1;ALOX15;MTOR;LMOD1;TMOD3;HCK;RHOC;STMN1;LIMK1;MIR20A;MIR21;MIR214;TACSTD2;SMAD3;MET;PAK1;PIK3CA;WNT4;PTGER4;RASA1;RGS4;ROCK1;CCL11;CCL21;CX3CL1;SDC4;CXCL12;SFRP1;BRAF;TACR1;TGFB3;TGFBR1;ARHGAP28;NRP1;SLIT2;CD47;CDC42	6.51456	7.32e-19
GOBP_DEFENSE_RESPONSE_TO_SYMBIONT	ABCC9;ADAR;LILRB1;PHB2;F2RL1;IL27;PTPN22;BIRC2;BIRC3;IFI27;IFIT1;IFNA1;IFNA13;IFNG;IL1B;IL4;IL6;IL12B;IL12RB1;IL15;CXCL10;ISG20;USP17L2;MBL2;CXCL9;MMP12;FOXP3;HERC5;IL23A;ATAD3A;HTRA1;PTPRC;IL21;BCL2;RELA;BCL2L1;SKP2;TLR2;TLR3;NLRC5;BECN1;HYAL2;IL33	6.13803	7.68e-19
GOBP_REGULATION_OF_MACROPHAGE_MIGRATION	CD200R1;CSF1;CSF1R;IL34;CX3CR1;CYP19A1;MSTN;MDK;MIF;MMP14;CD200;TREM2;MAPK1;MAPK3;RARRES2;CCL5;CX3CL1;THBS1;C5	28.0778	8.55e-19
GOBP_CELLULAR_RESPONSE_TO_MECHANICAL_STIMULUS	COL1A1;AGT;FGF2;ANKRD1;IGF1R;FAS;IL1B;AQP1;IL13;ITGA2;ITGB3;NFKB1;MAPK3;MAPK8;PTGER4;PTGS2;SLC2A1;SOX9;TLR3;TLR4;TNFRSF1A;BCL10;IL33	17.0505	8.7e-19
GOBP_POSITIVE_REGULATION_OF_MONONUCLEAR_CELL_MIGRATION	CXCL13;CCR1;CCR7;CSF1;CX3CR1;AIF1;FPR2;HMGB1;IL4;CXCL10;ITGB3;LGALS3;LGALS9;SERPINE1;CCL1;CCL5;CCL21;CXCL12;WNK1;ADAM17;TNF;CCR2;CD47	17.0505	8.7e-19
GOBP_ENDODERM_FORMATION	CTNNB1;DUSP1;DUSP2;DKK1;FN1;GATA6;INHBA;ITGA5;ITGAV;LAMB1;SMAD2;MMP2;MMP9;MMP14;POU5F1;MAP2K1;SOX2;HNF1B;VTN;NANOG;HMGA2	21.0036	1.03e-18
GOBP_NEGATIVE_REGULATION_OF_LYMPHOCYTE_DIFFERENTIATION	CTLA4;ERBB2;GLI3;TBX21;ANXA1;HMGB1;ID2;IHH;IL2;IL4;INHA;INHBA;MIR21;MDK;FOXP3;BCL6;SFRP1;BMP4;RUNX1;RUNX3;CD74	21.0036	1.03e-18
GOBP_VASCULAR_ENDOTHELIAL_GROWTH_FACTOR_RECEPTOR_SIGNALING_PATHWAY	PDCD6;MAPK14;FGF9;FLT1;HIF1A;IL1B;ITGA5;ITGB3;KDR;ARNT;MIR10B;MIR200C;PGF;PRKCB;AXL;SRC;VAV1;VEGFA;VEGFC;VTN;NRP1	21.0036	1.03e-18
GOBP_MESENCHYME_MORPHOGENESIS	HEY1;RBPJ;SMAD2;SMAD3;SMAD4;MDM2;MYC;NOS3;NOTCH1;ACTA2;BMP4;BMP7;SNAI2;SNAI1;SOX9;TGFB1;TGFB2;TGFB3;TGFBR1;TWIST1;WNT3A	21.0036	1.03e-18
GOBP_NATURAL_KILLER_CELL_ACTIVATION	KLRC4-KLRK1;RASGRP1;FCGR3A;KLRK1;NCR3;PTPN22;GATA3;IFNA1;IFNA13;IL2;IL2RB;IL12B;IL15;IL18;KLRC1;LEP;IL23A;PIK3CD;AXL;PTPRC;TYK2;TYROBP;BAG6;ULBP3;ULBP2;IL18R1	13.049	1.04e-18
GOBP_ASTROCYTE_DIFFERENTIATION	CDK6;F2;ID2;IFNG;IFNGR1;IL1B;IL6;KRAS;HES5;LIF;MIR142;MIR181C;NOTCH1;NTRK3;TREM2;MAPK1;MAPK3;MAP2K1;PSEN1;SOX9;STAT3;TLR4;TNF;VIM	15.3422	1.07e-18
GOBP_REGULATION_OF_CELLULAR_AMIDE_METABOLIC_PROCESS	MIR543;TOB1;EIF1;KHDRBS1;CYP1B1;DAPK1;DIO2;EIF4EBP1;ELAVL1;ERBB2;AKT1;FOXO3;MTOR;ANG;IFNG;IFNGR1;IGF1;APOE;CCN1;IL6;EIF3E;ITGA2;MIR100;MIR10B;MIR132;MIR145;MIR148A;MIR17;MIR181C;MIR20A;MIR200B;MIR200C;MIR204;MIR205;MIR21;MIR210;MIR27B;MIR29C;MIR31;MLH1;MIR135B;MSI1;NFE2L2;YBX1;NTRK2;MIR378A;MIR503;RELA;ROCK1;MIR483;CCL5;THBS1;TNF;TP53;UCN;VIM;ZFP36;CASP3	4.44344	1.08e-18
GOBP_REGULATION_OF_LIPASE_ACTIVITY	RASGRP1;PHB2;ADRA1A;AGT;AGTR1;EDNRA;EGFR;ESR1;FGF2;FGFR2;FLT1;ANG;ANXA1;APOA2;CCN1;RHOC;P2RY6;PDGFRA;PDGFRB;PPT1;CCL5;SELE;LPAR2;CD86;HDAC9	14.0569	1.12e-18
GOBP_NEGATIVE_REGULATION_OF_CELL_SUBSTRATE_ADHESION	CDKN2A;COL1A1;FBLN1;ANGPT2;MIR183;TACSTD2;MIR29C;MMP12;MMP14;NOTCH1;SERPINE1;PLG;PTEN;MIR503;RASA1;BCL6;CX3CL1;SRC;THBS1;ACTN4;FZD7;SEMA3E	18.518	1.24e-18
GOBP_MEGAKARYOCYTE_DIFFERENTIATION	CIB1;H4-16;GABPA;GATA2;IL11;LOX;MYB;PF4;MED1;H4C15;H4C9;H4C1;H4C4;H4C6;H4C12;H4C11;H4C3;H4C8;H4C2;H4C5;H4C13;H4C14	18.518	1.24e-18
GOBP_CELLULAR_RESPONSE_TO_RETINOIC_ACID	YAP1;PHB2;COL1A1;CREB1;EPHA3;FGFR2;GSK3B;HDAC2;AQP1;LEP;LYN;ATM;NTRK3;PAX2;SERPINF1;RORB;SLC6A4;SOX9;TNF;FZD7;WNT3A;HAND2	18.518	1.24e-18
GOBP_REGULATION_OF_JNK_CASCADE	RASGRP1;NOD1;CCR7;CRK;SIRPA;CCN2;EGFR;F2RL1;PLCB1;PTPN22;PDCD4;GSTP1;HMGB1;IGF1R;IL1A;IL1B;MAP2K7;CCL19;CCL21;SFRP1;SFRP2;TLR3;TLR4;TNF;WNT7A;AXIN1;FZD7;HDAC3;NCOR1;RASSF2	9.97449	1.35e-18
GOBP_POSITIVE_REGULATION_OF_COLLAGEN_METABOLIC_PROCESS	CCN2;F2;F2R;HDAC2;IHH;INHBA;ITGA2;PDGFRB;WNT4;BMP4;TGFB1;TGFB3;UCN;VIM;RUNX1;CREB3L1	49.1185	1.4e-18
GOBP_CELLULAR_RESPONSE_TO_RADIATION	CDKN1A;YAP1;PARP1;MAPK14;EGR1;ERCC1;SIRT1;GATA3;H2AX;AQP1;MIR21;MDM2;MME;MMP1;MMP2;MMP3;MMP9;MYC;ATM;PCNA;POLD1;PTGS2;BAX;BCL2L1;SAG;SFRP1;SFRP2;SNAI2;BRCA1;BRCA2;TIMP1;TP53;HYAL2;CLOCK	8.19026	1.45e-18
GOBP_REGULATION_OF_STEM_CELL_DIFFERENTIATION	CDK6;YAP1;ESRRB;EZH2;FGF2;GATA6;GDNF;GSK3B;HDAC1;HDAC2;HOXB4;HES5;TACSTD2;NFE2L2;NOTCH1;PDGFRA;PTN;SOX9;STAT3;TGFB2;ZFP36;WNT3A;MTA1;MTA2	15.0819	1.46e-18
GOBP_STRESS_FIBER_ASSEMBLY	CCN2;S1PR1;MTOR;ITGB1;RHOC;STMN1;LIMK1;MIR20A;MIR21;TACSTD2;SMAD3;MET;PAK1;WNT4;PTGER4;ROCK1;SDC4;SFRP1;SRC;BRAF;TACR1;TGFB3;TGFBR1;ARHGAP28;NRP1;CD47;CDC42	11.9458	1.47e-18
GOBP_RESPONSE_TO_PROGESTERONE	YAP1;TXNIP;CLDN4;CYP1B1;FOS;GJB2;IGF1R;OXTR;TRERF1;PTGER2;SRC;TACR1;TGFB1;TGFB2;TGFB3;THBS1;TSPO;TLR2	31.6539	1.59e-18
GOBP_REGULATION_OF_ENDOCRINE_PROCESS	CRH;CRHR1;CYP19A1;AGT;AGTR1;F2R;F2RL1;GJA1;INHA;INHBA;KISS1;LEP;SMAD4;RETN;REN;SPP1;TSPO;UCN	31.6539	1.59e-18
GOBP_FOAM_CELL_DIFFERENTIATION	CETP;CRP;CSF1;CSF2;AGT;AGTR1;IL18;ITGAV;ITGB3;NFKB1;NFKBIA;PF4;PLA2G2A;PPARA;PPARG;TGFB1;ADIPOQ;CD36	31.6539	1.59e-18
GOBP_REGULATION_OF_PHOSPHOLIPASE_ACTIVITY	RASGRP1;PHB2;ADRA1A;AGT;AGTR1;EDNRA;EGFR;ESR1;FGF2;FGFR2;FLT1;ANG;ANXA1;CCN1;P2RY6;PDGFRA;PDGFRB;PPT1;CCL5;SELE;LPAR2;CD86	18.1064	1.8e-18
GOBP_POSITIVE_REGULATION_OF_NF_KAPPAB_TRANSCRIPTION_FACTOR_ACTIVITY	NOD1;CIB1;CHUK;CTH;CX3CR1;AGT;GREM1;AMH;IL1B;IL1RAP;IL6;IL18;AR;LGALS9;LTF;PRKCB;RELA;CX3CL1;STAT3;BTK;TLR2;TLR3;TLR4;TNF;CARD11;CAT;IL18R1;BCL10;CD36;CLOCK;CD40LG	9.31573	1.95e-18
GOBP_POSITIVE_REGULATION_OF_CELL_DIVISION	DRD2;FGF1;FGF2;FGF9;FGFR2;NUP62;POLDIP2;BIRC5;IGF1R;IL1A;IL1B;MDK;YBX1;PDGFA;PGF;PTN;TGFB1;TGFB2;TGFB3;VEGFA;VEGFC;PROK1;CAT;CDC6;CDC42	13.6435	2e-18
GOBP_CARDIAC_CHAMBER_DEVELOPMENT	SEMA3C;EDNRA;FGFR2;PLXND1;HEY1;GATA3;GATA6;HIF1A;HOXA13;IGF1R;CCN1;RBPJ;SMAD4;MDM2;NOS3;NOTCH1;DLL4;MED1;SALL4;SFRP2;BMP4;BMP7;SLIT3;TEK;TGFB1;TGFB2;TGFBR1;TP53;PAX8;NRP1;SLIT2;HAND2	8.83839	2.1e-18
GOBP_CALCIUM_ION_TRANSMEMBRANE_TRANSPORT	CCR5;CCR7;CRHR1;ADRA1A;CCN2;DRD2;EDN1;EDNRA;EPO;F2;F2R;FGF2;GPER1;REM1;GSTM2;ANXA2;FASLG;IL13;CXCL10;ITGAV;ITGB3;LHCGR;LYN;MIR200C;MIR21;CXCL9;NOS1;OPRM1;P2RX3;P2RX5;P2RY6;PIK3CG;PSEN1;PTPRC;BAX;BCL2;CCL19;CCL21;CX3CL1;THY1;TRPC6;TRPV1;WNT3A;CD19;MS4A1	5.63745	2.29e-18
GOBP_POSITIVE_REGULATION_OF_HORMONE_SECRETION	CFTR;UCN3;CREB1;CRH;CYP19A1;DRD2;EDN1;FGA;GHRH;GHRHR;GPER1;HIF1A;HLA-DRB1;INHA;INHBA;KISS1;LEP;SMAD4;PPARG;RETN;PSMD9;SPP1;TACR1;TRH;UCN;NR0B2;CASR;IRS2	10.9588	2.29e-18
GOBP_POSITIVE_REGULATION_OF_T_CELL_MEDIATED_IMMUNITY	CD55;GATA3;TBX21;HLA-B;HLA-DRB1;HLA-G;HSPD1;IL1B;IL1R1;IL4;IL6;IL12B;IL12RB1;IL18;FOXP3;IL23A;B2M;PTPRC;PVR;ZP3;IL18R1	19.9262	2.35e-18
GOBP_POSITIVE_REGULATION_OF_LIPID_LOCALIZATION	CETP;CRH;CYP19A1;EDN1;SIRT1;ANXA2;APOE;IL1A;IL1B;FASLG;MIR10B;MIR34A;MIF;NFKB1;NFKBIA;TREM2;PON1;PPARG;RETN;RXRA;SPP1;SSTR4;C3;ADIPOQ;LIPG;CD36;PTGES	11.6675	2.42e-18
GOBP_POSITIVE_REGULATION_OF_PROTEIN_CONTAINING_COMPLEX_ASSEMBLY	BCL2L11;CDKN1B;CXCL13;CCR7;CSF2;CSF3;ESR1;ALOX15;MTOR;LMOD1;GSK3B;HCK;IFNG;RHOC;LGALS3;MECP2;MET;MMP1;MMP3;ATM;PAK1;BAX;CCL11;CCL21;FSCN1;SRC;TERF1;TGFB1;TLR4;TNF;TP53;VEGFA;SKAP1;CD36	7.98374	2.85e-18
GOBP_REGULATION_OF_AUTOPHAGY	BCL2L11;DNM1L;NOD1;DEPP1;LRRK2;ADRA1A;DAPK1;DCN;AKT1;FOXO1;FOXO3;SIRT1;DAPK2;SH3BP4;MTOR;POLDIP2;PTPN22;GBA;GSK3B;HGF;HIF1A;HMGB1;IFNG;IL4;IL10;KDR;LEP;LEPR;MIRLET7B;MET;ATM;PIK3CA;PIK3CB;TREM2;MAPK3;MAPK8;BCL2;ROCK1;STAT3;TSPO;TP53;UCHL1;CASP3;BECN1;USP10	5.5981	2.87e-18
GOBP_ADENYLATE_CYCLASE_ACTIVATING_G_PROTEIN_COUPLED_RECEPTOR_SIGNALING_PATHWAY	AKAP13;UCN3;CNR1;ADM;CRHR1;ADRA1A;ADRA2B;DRD2;S1PR1;LPAR3;FSHR;GHRH;GHRHR;GPER1;IAPP;CXCL10;LHCGR;CXCL9;OPRM1;PF4;PRKCA;PTGER2;PTGER4;PTGFR;RXFP1;SSTR4;VIP;CALCA;UCN2;LPAR2;S1PR2	9.16746	2.87e-18
GOBP_INORGANIC_ION_TRANSMEMBRANE_TRANSPORT	ABCB6;ABCC9;MTCO2P12;CFTR;SCN11A;PHB2;CLCN3;ANO4;CCR5;CCR7;CLDN4;CRHR1;ADRA1A;CCN2;CYB5A;DPP6;DRD2;EDN1;EDNRA;EPO;F2;F2R;FGF2;NEDD4L;GPER1;REM1;GSTM2;SLC40A1;ANXA2;IFNG;FASLG;AQP1;IL13;CXCL10;ITGAV;ITGB1;ITGB3;KCNQ1;KCNQ2;LHCGR;LYN;MIR200C;MIR21;MIR210;CXCL9;NOS1;OPRM1;P2RX3;P2RX5;P2RY6;PIK3CG;TREM2;ANKH;PSEN1;PTPRC;BAX;BCL2;RGS4;CCL19;CCL21;CX3CL1;SLC1A1;WNK1;SLC6A4;SLC20A1;THY1;TRPC6;TWIST1;UTR…	3.44656	3.06e-18
GOBP_REGULATION_OF_IMMUNOGLOBULIN_PRODUCTION	PHB2;FCRL3;EPHB2;TBX21;IL2;IL4;IL6;IL10;IL13;MLH1;MSH2;FOXP3;PTPRC;IL21;BCL6;STAT6;BTK;TGFB1;TNF;XBP1;IL33;CD86;CD40LG	15.7794	3.36e-18
GOBP_CALCIUM_ION_TRANSMEMBRANE_IMPORT_INTO_CYTOSOL	CCR5;CCR7;ADRA1A;CCN2;DRD2;EPO;F2;F2R;FGF2;GPER1;GSTM2;FASLG;IL13;CXCL10;ITGB3;LHCGR;LYN;MIR200C;CXCL9;NOS1;P2RX3;P2RX5;P2RY6;PTPRC;BAX;BCL2;CCL19;CCL21;CX3CL1;THY1;TRPV1;CD19;MS4A1	8.26321	3.6e-18
GOBP_ICOSANOID_METABOLIC_PROCESS	CYP1A1;CYP1A2;CYP1B1;CYP2B6;CYP2C19;AKR1C1;AKR1C2;EDN1;AKR1B1;SIRT1;ALOX15;HPGDS;GPX4;GSTM1;GSTP1;ANXA1;HPGD;IL1B;CYP4F3;MIR132;MIR204;MIF;PTGS2;TLR2;TNFRSF1A;AKR1C3;PTGES;CD74	10.7334	3.63e-18
GOBP_BLOOD_VESSEL_REMODELING	SEMA3C;ACE;AGT;AGTR2;EDNRA;RBPJ;LIF;MIR143;MIR17;MIR20A;MIR27B;MDM2;NOS3;DLL4;AXL;BAX;TGFB1;CCR2;ACVR2B	25.0577	3.92e-18
GOBP_LYMPHOCYTE_COSTIMULATION	KLRC4-KLRK1;LILRB2;CCR7;CSK;DPP4;AKT1;KLRK1;CD274;IL4;LGALS1;LYN;PIK3CA;CCL19;CCL21;SRC;VAV1;CARD11;CD86;CD40LG	25.0577	3.92e-18
GOBP_REGULATION_OF_CELLULAR_COMPONENT_SIZE	SEMA3C;CLCN3;CCR7;CRABP2;CREB1;CSF3;DPYSL2;EDN1;MEGF8;F2RL1;FN1;LPAR3;ALOX15;MTOR;LMOD1;GSK3B;TMOD3;HCK;APOE;IL7R;AQP1;L1CAM;LIMK1;MIR214;MAP2;NGF;PIK3CA;PTEN;SEMA6A;RASA1;BDNF;CCL11;CCL21;CXCL12;SPP1;UCN;VAV1;VEGFA;EZR;WNT7A;ARHGAP28;NRP1;WNT3A;SLIT2;SEMA3E;CDH1	5.40369	4.23e-18
GOBP_REGULATION_OF_CELL_MIGRATION_INVOLVED_IN_SPROUTING_ANGIOGENESIS	CIB1;FGF2;GATA2;ANXA1;KDR;MIR10B;MIR126;MIR132;MIR20A;MIR200C;MIR22;MIR27B;MIR29C;MIR31;NOTCH1;DLL4;PTGS2;MIR503;MIR483;THBS1;VEGFA;NRP1;HDAC9	15.4922	4.65e-18
GOBP_POSITIVE_REGULATION_OF_INTERLEUKIN_10_PRODUCTION	F2RL1;CD274;HGF;HMGB1;HSPD1;IL4;IL6;IL12B;IL13;LGALS9;MIR145;IL23A;TREM2;STAT3;TLR2;TLR4;TSLP;CD40LG	28.883	4.9e-18
GOBP_METANEPHRIC_NEPHRON_DEVELOPMENT	CTNNB1;AGTR2;EGR1;GREM1;GDNF;AQP1;HES5;LIF;PAX2;PDGFRA;PDGFRB;WNT4;BMP4;SOX9;TCF21;WT1;PAX8;ADIPOQ	28.883	4.9e-18
GOBP_ENDOTHELIAL_CELL_DEVELOPMENT	HPSE;CLDN3;EDNRA;F2RL1;PLCB1;HOXA13;ICAM1;IL1B;MET;NOTCH4;FOXP3;ROBO4;ROCK1;STC1;CLDN5;TNF;TNFRSF1A;VEGFA;EZR;COL18A1;CLDN1;S1PR2	16.9746	5.27e-18
GOBP_GLOMERULUS_DEVELOPMENT	AGTR2;EDNRA;EGR1;ANGPT1;ANGPT2;AQP1;ITGB3;NOTCH1;PAX2;PDGFA;PDGFRA;PDGFRB;SULF2;ACTA2;BCL2;BMP4;BMP7;TCF21;TEK;WT1;PROM1;ADIPOQ	16.9746	5.27e-18
GOBP_RESPONSE_TO_STARVATION	CDKN1A;PPARGC1A;UCN3;LRRK2;COMT;ADM;ALB;FOXO1;FOXO3;SIRT1;FOS;MTOR;GBA;IGF1R;FAS;NFE2L2;WNT4;KRT20;PPARA;UGT1A1;MAPK1;MAPK3;MAPK8;BCL2;SFRP1;SLC2A1;SRD5A1;SSTR1;KLF10;TP53;XBP1;ZFP36;MAP1LC3B;AKR1C3;BECN1	7.47187	5.69e-18
GOBP_NEGATIVE_REGULATION_OF_LEUKOCYTE_MIGRATION	ADA;KLRC4-KLRK1;CD200R1;CYP19A1;DPP4;DUSP1;AKT1;KLRK1;PLCB1;GREM1;MIF;CD200;PTGER4;CCL2;CCL21;CCL25;CXCL12;C5;IL33;SLIT2	21.1288	6.25e-18
GOBP_HEART_VALVE_MORPHOGENESIS	HEY1;MTOR;GATA3;CCN1;SMAD4;MDM2;NOS3;NOTCH1;DLL4;RB1;ROCK1;BMP4;SLIT3;SNAI2;SNAI1;SOX9;TGFB1;TGFB2;TWIST1;SLIT2	21.1288	6.25e-18
GOBP_ACUTE_PHASE_RESPONSE	CNR1;CRP;AHSG;EPO;F2;FN1;HP;IL1A;IL1B;IL6;MBL2;IL22;SERPINA1;UGT1A1;PTGS2;TNF;TRPV1;CD163;PTGES	24.2136	6.33e-18
GOBP_CELLULAR_RESPONSE_TO_VIRUS	ADAR;PHB2;CHUK;MAPK14;HIF1A;BIRC2;BIRC3;IFNA1;IFNA13;IFNG;IFNGR1;IL6;CXCL10;JAK1;USP17L2;LGALS9;MIR21;MIR30C1;SMAD3;MMP12;NFKB1;BAX;IL21;CCL5;CCL19;TLR3;TYK2	11.1447	6.35e-18
GOBP_EMBRYONIC_PLACENTA_DEVELOPMENT	CEBPA;ADM;CSF2;EGFR;AKT1;ESRRB;FGFR2;HEY1;GATA2;HIF1A;CCN1;RBPJ;IL10;LIF;ARNT;PLG;MED1;MAPK1;MAP2K1;BMP7;SNAI1;SOX15;NR2F2;NCOA1	13.905	6.61e-18
GOBP_CELLULAR_AMIDE_METABOLIC_PROCESS	ADA;MIR543;TOB1;EIF1;CEBPA;KHDRBS1;SMPDL3A;CPM;CYP1B1;DAPK1;ACE;DIO2;DPP4;EIF4EBP1;ELAVL1;ERBB2;AKT1;FOXO3;MTOR;GBA;HPGDS;ANG;GPX4;GSTM1;GSTM2;GSTP1;GSTT1;ACACA;IFNG;IFNGR1;IGF1;APOE;CCN1;IL6;EIF3E;ITGA2;ITGB8;GSTK1;ARG1;LGALS4;MIR100;MIR10B;MIR132;MIR145;MIR148A;MIR17;MIR181C;MIR20A;MIR200B;MIR200C;MIR204;MIR205;MIR21;MIR210;MIR27B;MIR29C;MIR31;MLH1;MME;MIR135B;MSI1;NFE2L2;YBX1;NTRK2;MIR378A;PPP…	3.03351	6.89e-18
GOBP_EPITHELIAL_TUBE_FORMATION	CTHRC1;ADM;CTNNB1;EGF;FGF2;FGFR2;GATA3;GREM1;GDNF;HIF1A;HES5;PAX2;PIK3CD;WNT4;SALL4;BRD2;SDC4;SFRP1;SFRP2;BMP4;BMP7;SOX9;HNF1B;TGFB1;TGFB2;TWIST1;PAX8;CASP3;BCL10	9.80956	7.25e-18
GOBP_NEGATIVE_REGULATION_OF_MUSCLE_CELL_DIFFERENTIATION	DNMT1;EZH2;FGF9;DKK1;FOXP1;PDCD4;HDAC1;ID2;MIR100;MIR200B;MIR21;SMAD4;MECP2;NOTCH1;YBX1;PPARA;PTBP1;RGS4;BDNF;XBP1;FZD7;HDAC3	16.6282	7.44e-18
GOBP_SIGNAL_TRANSDUCTION_BY_P53_CLASS_MEDIATOR	CDKN1A;CDKN1B;NDRG1;DDX5;AKT1;FOXM1;FOXO3;SIRT1;MTOR;CHD5;GREM1;ANKRD1;MIR21;MDM2;MIF;MSH2;MUC1;MYC;ATM;PSMD10;BAX;BCL2;SNAI2;SNAI1;BRCA2;TP53;TWIST1;BAG6;RNF34;USP10;CD44;CD74	8.40158	7.49e-18
GOBP_PEPTIDE_METABOLIC_PROCESS	MIR543;TOB1;EIF1;KHDRBS1;CPM;CYP1B1;DAPK1;ACE;DIO2;DPP4;EIF4EBP1;ELAVL1;ERBB2;AKT1;FOXO3;MTOR;HPGDS;ANG;GPX4;GSTM1;GSTM2;GSTP1;GSTT1;IFNG;IFNGR1;IGF1;APOE;IL6;EIF3E;ITGA2;GSTK1;LGALS4;MIR100;MIR10B;MIR132;MIR145;MIR148A;MIR17;MIR181C;MIR20A;MIR200B;MIR200C;MIR204;MIR205;MIR21;MIR210;MIR27B;MIR29C;MIR31;MLH1;MME;MIR135B;MSI1;NFE2L2;YBX1;NTRK2;MIR378A;QRSL1;PSEN1;MIR503;RELA;REN;ROCK1;MIR483;CCL5;S…	3.35397	7.68e-18
GOBP_REGULATION_OF_STRIATED_MUSCLE_CELL_DIFFERENTIATION	MAPK14;EDN1;EZH2;DKK1;MTOR;FOXP1;HDAC1;IGF1;MIR200B;MIR204;SMAD4;MMP14;NOTCH1;YBX1;PPARA;BCL2;RGS4;BDNF;BMP4;TGFB1;XBP1;FZD7;HDAC3;WNT3A;HDAC9	12.7052	7.94e-18
GOBP_TRANSFORMING_GROWTH_FACTOR_BETA_PRODUCTION	CDH3;LILRB1;FN1;GATA6;HIF1A;IL13;ITGAV;ITGB8;LGALS9;SMAD3;SMAD4;CD200;FOXP3;PTGS2;CX3CL1;TGFB2;THBS1;TYROBP	27.6866	8.36e-18
GOBP_REGULATION_OF_ACTIN_FILAMENT_BUNDLE_ASSEMBLY	CCN2;S1PR1;MTOR;RHOC;STMN1;LIMK1;MIR20A;MIR21;TACSTD2;SMAD3;MET;PAK1;WNT4;PTGER4;ROCK1;CX3CL1;SDC4;SFRP1;BRAF;TACR1;TGFB3;TGFBR1;ARHGAP28;NRP1;CD47;CDC42	11.7741	8.39e-18
GOBP_REGULATION_OF_CELL_MORPHOGENESIS	PLXNC1;CIB1;OLFM4;CFL1;CLDN4;CLDN3;CRK;CSF1R;EPHB2;F2;FBLN1;FGA;PLXND1;NEDD4L;FN1;ANXA1;HCK;ILK;ITGB3;KDR;RHOC;RHOG;MIR21;TACSTD2;MDK;RHOF;FGD6;PTPRD;RASA1;CCL2;CCL11;SRC;BRAF;SYT1;VEGFA;EZR;CXCR4;ACTN4;NRP1;CD44;SEMA3E;CDC42	5.85548	8.62e-18
GOBP_CAMERA_TYPE_EYE_MORPHOGENESIS	CTNNB1;EPHB2;ZHX2;FJX1;NECTIN3;GLI3;HIF1A;IHH;AQP1;AQP5;KDR;NOTCH1;NTRK2;PAX2;BAX;NECTIN1;RORB;SLC1A1;BMP4;BMP7;SOX9;STAT3;ZEB1;THY1;TWIST1;VEGFA;BCAR3;PROM1	10.3082	8.84e-18
GOBP_PROSTANOID_METABOLIC_PROCESS	AKR1C1;AKR1C2;EDN1;AKR1B1;SIRT1;HPGDS;GSTM1;GSTP1;ANXA1;HPGD;IL1B;MIR132;MIR204;MIF;PTGS2;TNFRSF1A;AKR1C3;PTGES;CD74	23.3991	1.01e-17
GOBP_POSITIVE_REGULATION_OF_SUPRAMOLECULAR_FIBER_ORGANIZATION	CDKN1B;CCR7;CSF3;CCN2;EDN1;F2RL1;ALOX15;MTOR;LMOD1;HCK;APOE;RHOC;LIMK1;SMAD3;MECP2;MET;PAK1;WNT4;PSEN1;RB1;CCL11;CCL21;CX3CL1;SDC4;SFRP1;BRAF;TACR1;TGFB3;TGFBR1;NRP1;CD47;CDC42	8.28462	1.06e-17
GOBP_STEM_CELL_DEVELOPMENT	PDCD6;SEMA3C;EDN1;EDNRA;FGF2;FN1;GDNF;HIF1A;KITLG;MAPK1;MAPK3;SEMA6A;PTPRC;BCL2;BMP4;BMP7;SNAI2;SOX9;TWIST1;WNT7A;NRP1;HAND2;SEMA3E;CDC42	13.4835	1.17e-17
GOBP_NUCLEAR_TRANSPORT	CDKN1A;TXNIP;KHDRBS1;AKAP13;PHB2;LRRK2;MAPK14;CSE1L;AGT;ELAVL1;AKT1;FGF9;NUP210;NUP62;GLI3;ANGPT1;GSK3B;IFI27;IFNG;IL1B;LEP;SMAD3;MMP12;NFKBIA;NOTCH1;MED1;PSEN1;PTGS2;BMP4;STAT3;TGFB1;TP53;TXN;RGPD2;THOC6;AXIN1;HYAL2;HDAC3;SQSTM1;CD36;IPO13;CDK1;CDH1	5.64229	1.21e-17
GOBP_ANGIOGENESIS_INVOLVED_IN_WOUND_HEALING	HPSE;GATA2;ITGB3;KDR;MIR200B;MIR34A;SERPINE1;PIK3CB;MIR451A;CX3CL1;SMOC2;TNF;VEGFA;XBP1;CXCR4;NDNF	39.2976	1.28e-17
GOBP_BODY_FLUID_SECRETION	ADA;AGR2;MTCO2P12;CHRM3;CREB1;EDN1;GHRHR;HIF1A;AQP1;AQP5;NME1;OXTR;MED1;PRL;PRLR;CCND1;WNK1;TACR1;UCN;USF2;VDR;VEGFA;VIP;XBP1	13.2822	1.55e-17
GOBP_ODONTOGENESIS_OF_DENTIN_CONTAINING_TOOTH	BCL2L11;FST;CFTR;ADM;CSF1;CTNNB1;DLX3;GATA6;GLI3;HDAC1;HDAC2;NGFR;TNFRSF11B;SERPINE1;PDGFRA;PPARA;HTRA1;BAX;NECTIN1;BMP4;BMP7;BSG;ACVR2B;HAND2	13.2822	1.55e-17
GOBP_ROOF_OF_MOUTH_DEVELOPMENT	TSHZ1;OSR2;DLX5;EPHB2;INTU;GLI3;INHBA;ITGB8;SMAD2;SMAD4;PDGFRA;BNC2;SNAI2;SNAI1;TCF21;TGFB2;TGFB3;TGFBR1;CLDN5;TWIST1;WNT7A;WNT3A;ACVR2B;HAND2	13.2822	1.55e-17
GOBP_REGULATION_OF_BONE_MINERALIZATION	OSR2;CCR1;S1PR1;AHSG;GREM1;HIF1A;CCN1;LTF;SMAD3;ENPP1;WNT4;ANKH;PTN;RXRA;BMP4;BMP7;BMPR1B;SOX9;TGFB1;TGFB3;TWIST1;VDR;ACVR2B	14.4426	1.61e-17
GOBP_POSITIVE_REGULATION_OF_OSTEOBLAST_DIFFERENTIATION	YAP1;CEBPA;CTHRC1;CTNNB1;FGF2;GLI3;HGF;IGF1;CCN1;IL6;ILK;LTF;MIR20A;MIR200C;MIR21;MIR210;WNT4;SFRP2;BMP4;BMP7;BMPR1B;ACVR2B	15.6608	2.02e-17
GOBP_SYNAPSE_ORGANIZATION	LILRB2;PDLIM5;CFL1;LRRK2;MAPK14;CTNNB1;CX3CR1;DRD2;EPHB2;ERBB2;F2R;DKK1;PLXND1;GDNF;TNC;APOE;IGF1R;IL1RAP;IL10;INSR;ITGAM;L1CAM;MECP2;NTRK2;NTRK3;OXTR;TREM2;SYBU;PSEN1;PTEN;PTPRD;NECTIN1;ACTB;BDNF;CX3CL1;SLC1A1;SNCG;TLR2;TNF;C3;WNT7A;YWHAZ;SPARCL1;ACTN1;NRP1;WNT3A;SEMA3E;CDC42;CDH1	4.81553	2.45e-17
GOBP_REGULATION_OF_NATURAL_KILLER_CELL_MEDIATED_IMMUNITY	KLRC4-KLRK1;RASGRP1;CD226;LILRB1;CRK;KLRK1;CADM1;NCR3;HLA-B;HLA-G;IL12B;KIR2DL4;KLRC1;LEP;LGALS9;SH2D1A;PVR;IL21;VAV1	21.936	2.46e-17
GOBP_RESPONSE_TO_ANGIOTENSIN	AGT;AGTR1;AGTR2;IGF1R;INHBA;MIR143;MIR145;MAS1;NFE2L2;NFKB1;PTGS2;RELA;ROCK1;SRC;CA2;CDC6	36.8505	2.5e-17
GOBP_PRODUCTION_OF_MOLECULAR_MEDIATOR_INVOLVED_IN_INFLAMMATORY_RESPONSE	SIRPA;MAPK14;EPHB2;EZH2;F2;PDCD4;HIF1A;IL6;IL17A;LEP;LYN;MIR17;MIR21;NOS2;MIR378A;SERPINE1;IL17D;TREM2;PPARA;STAT3;BTK;TLR4;TNF;IL1R2;CD36	11.8924	2.9e-17
GOBP_POSITIVE_REGULATION_OF_CYTOSKELETON_ORGANIZATION	CDKN1B;CCR7;CSF3;CCN2;EDN1;F2RL1;NUP62;ALOX15;MTOR;LMOD1;HCK;RHOC;LIMK1;SMAD3;MECP2;MET;NTF3;NTRK3;PAK1;WNT4;CCL11;CCL21;CX3CL1;SDC4;SFRP1;BRAF;TACR1;TEK;TGFB3;TGFBR1;NRP1;CD47;CDC42	7.59878	3.13e-17
GOBP_POSITIVE_REGULATION_OF_SYNAPTIC_TRANSMISSION	LILRB2;CNR1;CRHR2;ADRA1A;CX3CR1;DRD2;EPHB2;GPER1;GSK3B;APOE;KISS1;MECP2;MME;MIR342;NTRK2;OXTR;MAPK1;RETN;PTEN;PTGS2;PTN;CCL2;SLC1A1;BRAF;SYT1;TACR1;TNF;CCR2;TYROBP;CA2;SQSTM1	8.30799	3.15e-17
GOBP_REGULATION_OF_HEART_GROWTH	YAP1;MAPK14;DUSP6;EDN1;FGF2;FGF9;FGFR2;GATA6;FOXP1;GLI1;IGF1;RBPJ;MIR200B;MIR204;NOTCH1;PPARA;PTEN;RGS4;TGFBR1;WT1;RUNX1;CDK1	15.0803	3.83e-17
GOBP_MESODERM_DEVELOPMENT	YAP1;FGFR2;DKK1;AMH;GJA1;HCK;HOXA11;INHBA;ITGA2;ITGB1;ITGB3;MIR145;MIR200C;SMAD2;SMAD3;SMAD4;PAX2;SFRP2;BMP4;BMP7;SNAI1;BTK;VEGFA;HMGA2;AXIN1;WNT3A;ACVR2B;GDF3	9.63704	3.87e-17
GOBP_RENAL_SYSTEM_PROCESS	ADM;CLDN4;ADRA1A;ACE;DRD2;AGT;AGTR1;AGTR2;EDN1;EDNRA;F2R;F2RL1;AKR1B1;HSD11B2;AQP1;AQP2;KCNQ1;SULF2;BCL2;REN;BMP4;STC1;TACR1;TRPV1;AKR1C3;HYAL2;ADIPOQ	10.2377	3.87e-17
GOBP_REGULATION_OF_PEPTIDE_TRANSPORT	CFTR;UCN3;CNR1;CRH;DRD2;FGA;FOXO1;GHRH;GHRHR;GPER1;HIF1A;HLA-DRB1;FOXA2;IFNG;IL1B;IL6;KISS1;LEP;NOS2;PSMD9;CCL5;SFRP1;TNF;TRH;UCN;CA2;PAX8;NR0B2;CASR;IRS2;CLOCK;CD74	7.84769	4.14e-17
GOBP_CARBOHYDRATE_HOMEOSTASIS	CEBPA;CFTR;PPARGC1A;CNR1;CPB2;ACE;AKT1;FOXO1;FOXO3;SIRT1;GHRHR;GPER1;HIF1A;HK1;HLA-DRB1;FOXA2;ICAM1;IGF1R;IL6;INSR;LEP;LEPR;MIR33A;SMAD4;NGFR;PAX2;SERPINF1;PIK3CA;TREM2;PPARG;RAF1;SLC2A4;STAT3;XBP1;CASR;IRS2;ADIPOQ	6.46358	4.24e-17
GOBP_CELLULAR_RESPONSE_TO_INSULIN_STIMULUS	CDK4;PARP1;AGT;AHSG;AKT1;FOXO1;SIRT1;MSTN;GHRHR;GSK3B;IGF1R;IGFBP1;IL1B;INSR;LEP;MIR195;ENPP1;PIK3CA;ERRFI1;PPARG;PRKCB;RARRES2;RB1;SHC1;SLC2A4;SMARCC1;SRC;SRD5A1;XBP1;BCAR3;NCOA1;IRS2;ADIPOQ;HDAC9	7.20794	4.25e-17
GOBP_POSITIVE_REGULATION_OF_B_CELL_ACTIVATION	ADA;CDKN1A;FCRL3;EPHB2;TBX21;IL2;IL4;IL6;IL7;IL10;IL13;MIF;MLH1;MMP14;MSH2;PRLR;PTPRC;IL21;BCL2;BCL6;STAT6;BTK;TGFB1;TLR4;XBP1;CARD11;IRS2;WNT3A;CD74	9.06589	4.36e-17
GOBP_OLEFINIC_COMPOUND_METABOLIC_PROCESS	ADM;CYP1A1;CYP1A2;CYP1B1;CYP2B6;CYP2C19;CYP3A4;CYP11A1;CYP17A1;CYP19A1;AKR1C1;AKR1C2;EGR1;AKR1B1;ALOX15;FSHB;GPX4;GSTM2;GSTP1;HSD11B2;HSD17B1;HSD17B3;LHB;LIPE;CYP4F3;WNT4;PTGS2;SRD5A1;SRD5A2;AKR1C3	8.59055	4.55e-17
GOBP_ADAPTIVE_THERMOGENESIS	PPARGC1A;DECR1;DIO2;GATM;GJA1;IGF1R;RBPJ;IL4;IL13;IL15;IL18;LEP;LEPR;NOTCH1;OXTR;PRLR;RB1;STAT6;ADAM17;THRA;TLR4;CCR2;VEGFA;TRPV1;CXCR4;IL18R1;HDAC3;ACVR2B;ADIPOQ;CD36	8.59055	4.55e-17
GOBP_REGULATION_OF_KIDNEY_DEVELOPMENT	AGT;AGTR2;GATA3;GREM1;GDNF;TACSTD2;MYC;PAX2;WNT4;BMP4;SOX9;HNF1B;VEGFA;WT1;PAX8;ADIPOQ	34.6852	4.74e-17
GOBP_CARDIAC_CHAMBER_MORPHOGENESIS	SEMA3C;EDNRA;FGFR2;HEY1;GATA3;GATA6;HIF1A;CCN1;RBPJ;SMAD4;MDM2;NOS3;NOTCH1;DLL4;MED1;SFRP2;BMP4;BMP7;SLIT3;TEK;TGFB1;TGFB2;TGFBR1;TP53;NRP1;SLIT2;HAND2	10.13	4.8e-17
GOBP_COLUMNAR_CUBOIDAL_EPITHELIAL_CELL_DIFFERENTIATION	CDK6;YAP1;FST;AGR2;CTNNB1;DLX3;AKT1;FGF2;FGFR2;NR5A2;GATA2;GATA6;GSK3B;HIF1A;IL13;NOTCH1;SERPINE1;PGR;WNT4;RARB;ROS1;BMP4;BMP7;SOX9;SRC;CLOCK	10.7247	5.61e-17
GOBP_T_CELL_RECEPTOR_SIGNALING_PATHWAY	ADA;KHDRBS1;CD226;CCR7;CSK;CTLA4;PTPN22;GATA3;TNFRSF21;HLA-DPB1;HLA-DQB1;HLA-DRB1;LGALS3;SH2D1A;FOXP3;PIK3CA;PIK3CD;MAPK1;PSEN1;PTPRC;RELA;WNK1;BRAF;THY1;EZR;CARD11;SKAP1;BCL10	9.46314	5.8e-17
GOBP_POSITIVE_REGULATION_OF_TISSUE_REMODELING	IL2;IL12B;IL15;IL18;MIR143;MIR17;MIR195;MIR20A;MIR214;MIR27B;MIR34A;IL23A;IL21;ROCK1	57.3154	5.82e-17
GOBP_ERBB_SIGNALING_PATHWAY	AGR2;AGT;HBEGF;EGF;EGFR;ERBB2;AKT1;NUP62;GPER1;RBPJ;FASLG;AREG;MIR21;MMP9;PIK3CA;ERRFI1;MAPK1;PSEN1;SHC1;SOX9;SRC;BRAF;ADAM17;TDGF1;TGFB1;BCAR3;RASSF2	10.0299	5.95e-17
GOBP_REGULATION_OF_SYSTEMIC_ARTERIAL_BLOOD_PRESSURE	ADM;ADRA1A;ACE;DRD2;AGT;AGTR1;AGTR2;EDN1;F2R;F2RL1;HSD11B2;AR;MIR17;MECP2;NOS3;OXTR;REN;WNK1;SOD2;TACR1;NR2F2;TNF;TRPV1;CALCA	12.3589	5.98e-17
GOBP_T_HELPER_1_TYPE_IMMUNE_RESPONSE	IL27;MTOR;TBX21;ANXA1;HLA-DRB1;HMGB1;IL1B;IL1R1;IL12B;IL12RB1;IL18;IL23A;CCL19;STAT6;TLR4;CCR2;IL18R1;IL33	23.7311	6.03e-17
GOBP_NEGATIVE_REGULATION_OF_CHEMOTAXIS	KLRC4-KLRK1;SEMA3C;CXCL13;CYP19A1;DPP4;DUSP1;AIF1;KLRK1;GREM1;ANGPT2;MIR34A;MIF;NOTCH1;SEMA6A;CCL2;THBS1;C5;NRP1;WNT3A;SLIT2;SEMA3E	16.1818	6.31e-17
GOBP_DIGESTION	PPARGC1A;CHRM3;UCN3;AKR1C1;AKR1C2;ARX;APOA2;AQP1;IL17A;AQP5;KCNQ1;LEP;MDK;MUC2;MUC4;OXTR;WNK1;SOX9;SST;TACR1;TFF3;TLR4;UCN;VDR;EZR;TRPV1;UCN2;CD36	9.37753	7.08e-17
GOBP_CELL_CELL_ADHESION_VIA_PLASMA_MEMBRANE_ADHESION_MOLECULES	CDH3;CDH15;MMP24;CLDN4;CLDN3;CLDN7;MAPK14;KIFAP3;CADM1;CADM2;NECTIN3;ICAM1;IL1RAP;IL1RN;IL10;ITGA5;ITGAM;ITGB1;L1CAM;CLDN11;PIK3CB;ROBO4;PTPRD;PVR;NECTIN1;CX3CL1;SELE;SELL;WNK1;BSG;TGFB2;CLDN5;TRO;VCAM1;NECTIN4;SPARCL1;CLDN1;ADIPOQ;CDH1	5.95722	7.18e-17
GOBP_POSITIVE_REGULATION_OF_RECEPTOR_MEDIATED_ENDOCYTOSIS	DRD2;EGF;GREM1;GH1;ANGPT1;ANXA2;IL4;INSR;NTF3;SERPINE1;PPT1;B2M;CCL19;CCL21;SELE;C3;VEGFA;VTN;WNT3A	20.0553	8.65e-17
GOBP_PROTEIN_LOCALIZATION_TO_CHROMATIN	H4-16;ESR1;EZH2;MSH2;PLK1;H4C15;RB1;H4C9;H4C1;H4C4;H4C6;H4C12;H4C11;H4C3;H4C8;H4C2;H4C5;H4C13;H4C14	20.0553	8.65e-17
GOBP_NEGATIVE_REGULATION_OF_T_CELL_PROLIFERATION	LILRB2;LILRB1;CTLA4;ERBB2;TNFRSF21;CD274;HLA-DRB1;HLA-G;IHH;IL2RA;IL10;IDO1;ARG1;LGALS9;MIR181C;FOXP3;PTEN;SDC4;BMP4;CASP3;CD86	15.8513	8.79e-17
GOBP_CELLULAR_PROCESS_INVOLVED_IN_REPRODUCTION_IN_MULTICELLULAR_ORGANISM	CIB1;CFTR;CTNNB1;DNMT3A;EDN1;EDNRA;ERCC1;AKT1;FOXO3;MTOR;FSHB;FSHR;NECTIN3;AMH;HPGDS;GLI1;ANG;ANGPT2;DNMT3L;IGF1;IHH;INHBA;ITGB1;MDK;MLH1;MSH2;ATM;PAEP;PLK1;WNT4;PPP2R1A;RETN;PTN;BAX;BCL2;BCL2L1;SFRP1;BMP4;BMPR1B;SLIT3;SRC;BRCA2;TGFBR1;UCHL1;WT1;ZP3;LGR5;SLIT2	4.73786	8.95e-17
GOBP_POSITIVE_REGULATION_OF_PROTEIN_SECRETION	DNM1L;CFTR;UCN3;F2RL1;FGA;ANKRD1;ANG;GPER1;HIF1A;HLA-DRB1;IGF1;IL1A;IL13;TREM2;PPARG;PSMD9;TGFB1;TGFB2;TGFB3;TLR2;TLR4;TRH;VEGFC;EZR;NR0B2;CASR;IRS2	9.8338	9.06e-17
GOBP_POSITIVE_REGULATION_OF_CALCIUM_ION_TRANSPORT	CCR1;F2;F2R;GPER1;GSTM2;IL13;CXCL10;LGALS3;LHCGR;CXCL9;P2RX3;P2RX5;P2RY6;PDGFRB;BAX;CCL2;CCL5;CX3CL1;CXCL12;STC1;TSPO;THY1;TRPC6;UCN;CASR;CD19;MS4A1	9.8338	9.06e-17
GOBP_B_CELL_ACTIVATION_INVOLVED_IN_IMMUNE_RESPONSE	ADA;DOCK11;ERCC1;MSH6;TBX21;HSPD1;IL2;IL4;IL6;IL10;LGALS1;MLH1;MSH2;FOXP3;PTPRC;IL21;BCL6;STAT6;TGFB1;TLR4;XBP1;CD19;CD40LG	13.1096	9.09e-17
GOBP_NEGATIVE_REGULATION_OF_CELL_CYCLE_PROCESS	CDKN1A;CDKN1B;MAPK14;DUSP1;ERCC6;EZH2;FANCD2;GPER1;H2AX;HLA-G;BIRC5;INHBA;LIF;MIR195;MIR29C;MIR30C2;MDM2;MSH2;MUC1;ATM;PLK1;PTEN;MIR451A;MIR503;RB1;CCND1;BCL2;BCL6;CCL2;BMP4;BMP7;SOX2;BRCA1;BRCA2;TERF1;TP53;XRCC3;CCNB1;CLOCK;CDK1;CDC6	5.56453	1e-16
GOBP_MORPHOGENESIS_OF_EMBRYONIC_EPITHELIUM	CTHRC1;ADM;CTNNB1;FGFR2;GATA3;GREM1;GDNF;HIF1A;AR;HES5;PAX2;WNT4;SALL4;BRD2;SDC4;SFRP1;SFRP2;BMP4;BMP7;SOX9;HNF1B;TGFB1;TGFB1I1;TGFB2;TWIST1;VEGFC;PAX8;CASP3;BCL10	8.69946	1.12e-16
GOBP_MONOCARBOXYLIC_ACID_BIOSYNTHETIC_PROCESS	CRABP2;CYP1A1;CYP1A2;CYP3A4;EDN1;SIRT1;ALOX15;GATM;HPGDS;GPX4;GSTM1;GSTM2;GSTP1;ANXA1;ACACA;IL1B;IDO1;LIPC;MIR132;MIR204;MIR30C1;MIR33A;MIF;PTGS2;RBP1;SRR;BRCA1;STAR;XBP1;AKR1C3;LIPG;TECR;PTGES;CD74	6.93182	1.19e-16
GOBP_CARBOHYDRATE_METABOLIC_PROCESS	PPARGC1A;MAPK14;EGF;ENO1;AKT1;FOXO1;AKR1B1;SIRT1;MTOR;GALNT3;GALT;GPER1;NR3C1;GSK3B;HAS1;HIF1A;HK1;FOXA2;IFNG;IGF1;IGFBP3;IMPA2;INSR;KCNQ1;LEP;LEPR;LHCGR;ARNT;MIR195;MIR210;MAS1;MECP2;MST1;NFKB1;P2RY6;ENPP1;PIK3CA;PPARA;ST6GALNAC1;PSEN1;PTEN;SLC2A1;SLC2A3;SLC2A4;SRC;BRAF;STAT3;BRS3;TFF3;TGFB1;TNF;TP53;IRS2;HYAL2;ADIPOQ;CHST3;NCOR1	4.017	1.24e-16
GOBP_ORGANIC_HYDROXY_COMPOUND_BIOSYNTHETIC_PROCESS	CDH3;CFTR;CYP2R1;CYP3A4;CYP19A1;FGF1;FGF2;SIRT1;ALOX15;GATA3;GBA;GPER1;HSD17B1;HSD17B3;IFNG;APOE;IMPA2;LBR;LEP;LHCGR;MIR30C1;MIR33A;MAS1;NFKB1;P2RY6;HSD17B7;WNT4;SNAI2;SNAI1;SOD1;SRD5A2;STAR;TGFB2;TNF;AKR1C3;HAND2	6.43436	1.25e-16
GOBP_MUSCLE_CELL_DEVELOPMENT	MYL9;PDLIM5;AKAP13;ADM;ADRA1A;AGT;EDN1;EDNRA;MTOR;LMOD1;ANKRD1;FOXP1;TMOD3;IGF1;ITGB1;LOX;MIR195;SMAD4;NOTCH1;PDGFRA;PDGFRB;PPARA;BCL2;RGS4;SDC1;BMP4;UCHL1;VEGFA;ACTN4;ACTN1;HDAC9;CDK1	7.5016	1.28e-16
GOBP_RESPONSE_TO_GONADOTROPIN	CYP1B1;EDN1;EDNRA;FSHR;GATA6;GJB2;INHBA;LHCGR;MAS1;NOTCH1;PAPPA;SRD5A1;SRD5A2;WT1;PAX8	39.4398	1.29e-16
GOBP_REGULATION_OF_MONOCYTE_CHEMOTAXIS	CCR1;CX3CR1;DUSP1;AIF1;FPR2;GREM1;HMGB1;CXCL10;LYN;SERPINE1;CCL1;CCL5;CXCL12;CCR2;SLIT2	39.4398	1.29e-16
GOBP_BLOOD_VESSEL_ENDOTHELIAL_CELL_PROLIFERATION_INVOLVED_IN_SPROUTING_ANGIOGENESIS	AGTR1;FGF2;GATA2;IL12B;MIRLET7B;MIR10B;MIR126;MIR132;MIR21;MIR27B;MIR29C;MIR342;NGFR;DLL4;MIR503;MIR483;BMP4;THBS1;VEGFA	19.4981	1.29e-16
GOBP_POSITIVE_REGULATION_OF_PHOSPHOLIPASE_ACTIVITY	PHB2;ADRA1A;AGT;AGTR1;EDNRA;EGFR;ESR1;FGF2;FGFR2;FLT1;ANG;CCN1;P2RY6;PDGFRA;PDGFRB;CCL5;SELE;LPAR2;CD86	19.4981	1.29e-16
GOBP_RESPONSE_TO_FATTY_ACID	CDK4;CCN2;AKR1C1;AKR1C2;EDN1;FOXO1;FOXO3;PLCB1;PIK3CA;PON1;PPP5C;PTGS2;SOX9;SRC;TLR2;CAT;AKR1C3;CLDN1;ADIPOQ;CD36	17.1973	1.36e-16
GOBP_MEMORY	CNR1;CREB1;CX3CR1;DRD2;FEN1;PLCB1;APOE;INSR;ITGA5;MDK;MECP2;NGF;NTF3;NTF4;OXTR;SERPINF1;TREM2;PSEN1;PTGS2;PTN;BDNF;S100B;SLC1A1;SLC2A4;SLC6A4;TACR1	10.2692	1.36e-16
GOBP_REGULATION_OF_BONE_REMODELING	CSF1R;CSK;S1PR1;FSHB;GREM1;IAPP;IL6;ITGB3;LEP;LEPR;MDK;TNFRSF11B;PRKCA;SFRP1;SPP1;SRC;CALCA;DCSTAMP	22.1484	1.49e-16
GOBP_CELLULAR_RESPONSE_TO_AMYLOID_BETA	BCL2L11;PARP1;EPHB2;FOXO3;FPR2;GJA1;GSK3B;ICAM1;IGF1;IGF1R;MIR200A;NGFR;TREM2;PSEN1;TLR4;TNF;VCAM1;CD36	22.1484	1.49e-16
GOBP_NEGATIVE_REGULATION_OF_LIPID_METABOLIC_PROCESS	CNR1;AKT1;FMO2;SIRT1;GPER1;APOA2;APOE;IL1B;MIR132;MIR204;MIR30C1;MIR33A;NFKB1;PDGFA;PIK3CG;WNT4;UGT1A1;SNAI2;SNAI1;SOD1;SOX9;BRCA1;TNF;AKR1C3;NCOR1	10.9097	1.56e-16
GOBP_REGULATION_OF_CELLULAR_CARBOHYDRATE_METABOLIC_PROCESS	PPARGC1A;AKT1;FOXO1;SIRT1;MTOR;GPER1;NR3C1;GSK3B;FOXA2;IGF1;IGFBP3;INSR;LEP;LEPR;LHCGR;MIR195;MIR210;MAS1;MST1;P2RY6;ENPP1;PPARA;SRC;STAT3;TFF3;TP53;IRS2;ADIPOQ;NCOR1	8.56106	1.61e-16
GOBP_CARBOHYDRATE_TRANSMEMBRANE_TRANSPORT	MAPK14;ACE;EDN1;EDNRA;AKT1;GH1;IGF1;IL1B;AQP1;AQP2;INSR;AQP9;LEP;MIR143;NFE2L2;ENPP1;PRKCB;SLC2A1;SLC2A3;SLC2A4;BRAF;TERT;TNF;C3;IRS2;PEA15;ADIPOQ	9.55453	1.68e-16
GOBP_POSITIVE_REGULATION_OF_STRESS_ACTIVATED_PROTEIN_KINASE_SIGNALING_CASCADE	RASGRP1;NOD1;CCR7;CRK;CCN2;F2RL1;PLCB1;HMGB1;IGFBP6;IL1A;IL1B;LEP;LYN;MAP2K7;CCL19;CCL21;BMP4;TGFB2;TLR3;TLR4;TNF;VEGFA;WNT7A;AXIN1;FZD7;HAND2;RASSF2	9.55453	1.68e-16
GOBP_PROCESS_UTILIZING_AUTOPHAGIC_MECHANISM	BCL2L11;DNM1L;NOD1;DEPP1;PHB2;LRRK2;ADRA1A;DAPK1;DCN;DRD2;AKT1;FOXO1;FOXO3;SIRT1;DAPK2;SH3BP4;MTOR;POLDIP2;PTPN22;GBA;GSK3B;HGF;HIF1A;HMGB1;IFNG;IL4;IL10;KDR;LEP;LEPR;MIRLET7B;MET;ATM;VTA1;PIK3CA;PIK3CB;TREM2;VPS11;MAPK3;MAPK8;PSEN1;BCL2;ROCK1;ATG3;SRC;STAT3;TSPO;TP53;UCHL1;XBP1;MAP1LC3B;CASP3;BECN1;SQSTM1;USP10	4.10955	1.68e-16
GOBP_REGULATION_OF_DNA_BINDING	PARP1;CTNNB1;EGF;ERCC2;HEY1;GATA3;HDAC2;HMGB1;IFNG;IGF1;ITGA2;JUN;LIF;MMP9;NFKBIA;NGF;NME1;PPARG;MAPK8;PSEN1;RB1;TGFB1;TWIST1;TXN;HMGA2;HAND2	10.157	1.69e-16
GOBP_REGULATION_OF_STEROL_TRANSPORT	CETP;TTC39B;EGF;SIRT1;ANXA2;APOA2;APOE;LEP;MIR148A;MIR17;MIR27B;MIR33A;NFKB1;NFKBIA;TREM2;PON1;PPARG;RXRA;MIR33B;TSPO;ADIPOQ;LIPG	13.8038	1.73e-16
GOBP_LIMBIC_SYSTEM_DEVELOPMENT	CDK6;CRK;CTNNB1;DRD2;EMX2;EZH2;FGFR2;GLI3;GSK3B;HDAC1;HSD3B1;HSD3B2;IGF1R;MAS1;MDK;PTEN;BAX;SRD5A1;SRD5A2;XRCC1;NDNF;CASP3;NRP1;WNT3A;SEMA3E	10.7831	1.97e-16
GOBP_SIGNAL_TRANSDUCTION_IN_RESPONSE_TO_DNA_DAMAGE	CDKN1A;CDKN1B;NDRG1;MAPK14;DDX5;ERCC6;FANCD2;FOXM1;FOXO3;SIRT1;ANKRD1;H2AX;MDM2;MIF;MSH2;MUC1;ATM;PLK1;PSMD10;CCND1;SNAI2;SNAI1;BRCA1;BRCA2;TP53;TWIST1;USP10;CLOCK;CD44;CD74;CDK1	7.69761	2e-16
GOBP_POSITIVE_REGULATION_OF_NEURON_DEATH	BCL2L11;PARP1;CTNNB1;EGR1;DKK1;FOXO3;FOS;NR3C1;GSK3B;IFNG;FASLG;ITGAM;MIR200A;ATM;MAP2K7;BAX;TGFB2;TLR4;TNF;TP53;TYROBP;AIMP2;CASP3	12.5262	2.04e-16
GOBP_RESPONSE_TO_NICOTINE	CNR1;DRD2;EDN1;HDAC2;IGF1R;IL13;KCNQ1;MMP2;NFKB1;PPARA;MAPK1;B2M;BCL2;RELA;TACR1;TNF;VCAM1;CASP3	21.4337	2.29e-16
GOBP_ENDODERMAL_CELL_DIFFERENTIATION	CTNNB1;DKK1;FN1;GATA6;INHBA;ITGA5;ITGAV;LAMB1;MMP2;MMP9;MMP14;POU5F1;MAP2K1;SOX2;HNF1B;VTN;NANOG;HMGA2	21.4337	2.29e-16
GOBP_ORGANIC_ACID_TRANSPORT	ABCC4;CRABP2;ACE;AKR1C1;DRD2;AGT;EDN1;AKT1;SLC7A8;SH3BP4;GJA1;ANXA1;APOE;IL1A;IL1B;AQP9;ITGB1;ARG1;LEP;LHCGR;MIF;NTRK2;PLA2G2A;PPARA;PPARG;PSEN1;RBP1;RGS4;SLC1A1;SLC2A1;SSTR4;THBS1;TNF;TRH;TRPV1;SLC38A1;NR0B2;IRS2;SFXN1;CD36;PTGES	5.40715	2.43e-16
GOBP_ANDROGEN_METABOLIC_PROCESS	ADM;CYP3A4;CYP17A1;CYP19A1;ESR1;HSD3B1;HSD3B2;HSD17B3;HSD17B2;HSD17B7;WNT4;MED1;SPP1;SRD5A1;SRD5A2	36.8192	2.51e-16
GOBP_POSITIVE_REGULATION_OF_LEUKOCYTE_APOPTOTIC_PROCESS	BCL2L11;CDKN2A;SIRT1;CD274;ANXA1;IL10;IDO1;LGALS9;LYN;PDCD1;PIK3CB;PIK3CD;BAX;CCL5;TP53	36.8192	2.51e-16
GOBP_STEROL_TRANSPORT	CETP;CFTR;TTC39B;AKR1C1;EGF;SIRT1;ANXA2;APOA2;APOE;LEP;LIPC;MIR148A;MIR17;MIR27B;MIR33A;NFKB1;NFKBIA;TREM2;PON1;PPARG;RXRA;STAR;MIR33B;TSPO;ADIPOQ;LIPG;CD36	9.28625	3.05e-16
GOBP_SMOOTH_MUSCLE_CONTRACTION	ADA;CHRM3;ADRA1A;ADRA2B;DRD2;AGT;EDN1;EDNRA;F2R;GDNF;GPER1;ITGA2;MIR143;MIR145;MIR21;OXTR;P2RX3;SULF2;PTGS2;ACTA2;ROCK1;SOD1;TACR1;TRPV1;CALCA	10.5383	3.09e-16
GOBP_DNA_DAMAGE_RESPONSE_SIGNAL_TRANSDUCTION_BY_P53_CLASS_MEDIATOR	CDKN1A;CDKN1B;NDRG1;DDX5;FOXM1;FOXO3;SIRT1;ANKRD1;MDM2;MIF;MUC1;ATM;PSMD10;SNAI2;SNAI1;BRCA2;TP53;TWIST1;USP10;CD44;CD74	14.6551	3.12e-16
GOBP_REGULATION_OF_CELL_SIZE	SEMA3C;CLCN3;CRABP2;CREB1;DPYSL2;EDN1;MEGF8;FN1;LPAR3;MTOR;GSK3B;APOE;IL7R;AQP1;L1CAM;LIMK1;MAP2;NGF;PTEN;SEMA6A;BDNF;CXCL12;SPP1;UCN;VAV1;VEGFA;EZR;NRP1;WNT3A;SEMA3E;CDH1	7.54643	3.24e-16
GOBP_CELLULAR_MACROMOLECULE_BIOSYNTHETIC_PROCESS	MIR543;UST;TOB1;EIF1;KHDRBS1;GALNT6;CCR7;CTNNB1;CYP1B1;DAPK1;DIO2;HBEGF;EIF4EBP1;ELAVL1;TET3;EPO;ERBB2;AKT1;EXTL3;FOXO3;PLCB1;MTOR;GALNT3;GBA;ANG;GSK3B;HAS1;HIF1A;IGF1;APOE;IL6;IL15;INHA;INHBA;INSR;EIF3E;ITGA2;MIR100;MIR10B;MIR132;MIR145;MIR148A;MIR17;MIR181C;MIR195;MIR20A;MIR200B;MIR200C;MIR204;MIR205;MIR21;MIR210;MIR27B;MIR29C;MIR31;MLH1;MIR135B;MSI1;YBX1;MIR378A;ENPP1;QRSL1;ST6GALNAC1;PSEN1;MI…	2.90487	3.42e-16
GOBP_REGULATION_OF_EXTRINSIC_APOPTOTIC_SIGNALING_PATHWAY_VIA_DEATH_DOMAIN_RECEPTORS	FGA;GSK3B;HGF;ICAM1;LGALS3;NOS3;SERPINE1;PTEN;RAF1;BCL2L1;SFRP1;SFRP2;BMPR1B;BRCA1;THBS1;TIMP3;RNF34;PEA15	20.7638	3.49e-16
GOBP_REGULATION_OF_T_HELPER_CELL_DIFFERENTIATION	IL27;GATA3;TBX21;ANXA1;HLA-DRB1;IL2;IL4;IL12B;IL12RB1;IL18;MIR21;MYB;FOXP3;IL23A;BCL6;CCL19;CD86	24.1212	3.6e-16
GOBP_PROTEIN_LOCALIZATION_TO_CHROMOSOME_CENTROMERIC_REGION	CTCF;H4-16;H4C15;RB1;H4C9;H4C1;H4C4;H4C6;H4C12;H4C11;H4C3;H4C8;H4C2;H4C5;H4C13;H4C14;CDK1	24.1212	3.6e-16
GOBP_REGULATION_OF_CELLULAR_KETONE_METABOLIC_PROCESS	PPARGC1A;CNR1;ADM;EGR1;AKT1;FMO2;SIRT1;ANXA1;IL1B;MIR132;MIR204;MIR21;MIR30C1;MIR33A;WNT4;PPARA;PPARG;PTGS2;SOX9;BRCA1;STAR;TWIST1;AKR1C3;IRS2;ADIPOQ;NCOR1;CD74	9.20085	3.71e-16
GOBP_REGULATION_OF_PROTEIN_CATABOLIC_PROCESS	CDKN1B;CEBPA;LRRK2;EGFR;AKT1;FOXO1;RNF19A;GBA;MYLIP;GSK3B;ANXA2;IFNG;APOE;IL1B;IL10;SMAD3;SMAD4;MDM2;NFE2L2;NOS2;PLK1;TREM2;VPS11;PSEN1;PSMD2;PSMD10;RELA;ROCK1;SMARCC1;SOX9;STX5;TIMP1;TIMP2;TIMP3;TIMP4;TNF;TNFRSF1B;EZR;VIP;BAG6;AXIN1;IL33;CDH1	5.06968	3.76e-16
GOBP_NEGATIVE_REGULATION_OF_PROTEIN_KINASE_B_SIGNALING	PDCD6;CIB1;DRD2;SIRT1;MSTN;GPER1;HLA-G;MIR145;MIR20A;MIR200C;MIR29C;MIR34A;MIR342;MIR375;PIK3CB;PPARA;PTEN;MIR451A;HYAL2	17.9982	4.03e-16
GOBP_CELL_DIFFERENTIATION_INVOLVED_IN_KIDNEY_DEVELOPMENT	YAP1;CTNNB1;EDNRA;GATA3;GREM1;GDNF;GLI3;LIF;MMP9;NOTCH1;PAX2;WNT4;ACTA2;BMP4;TCF21;WT1;PAX8;PROM1;ADIPOQ	17.9982	4.03e-16
GOBP_ESTABLISHMENT_OF_PROTEIN_LOCALIZATION_TO_ORGANELLE	CDKN1A;TXNIP;PHB2;LRRK2;MAPK14;CSE1L;AGT;ELAVL1;AKT1;FGF9;NUP62;GLI3;ANGPT1;HK1;HSPA4;HSPD1;IFNG;LEP;LHCGR;SMAD3;MMP12;NFKBIA;NOTCH1;MED1;VPS11;MAPK8;PSEN1;PTGS2;BAX;BMP4;BRCA2;STAT3;TERF1;TERT;TGFB1;TSPO;TP53;RGPD2;BAG6;BECN1;HYAL2;HDAC3;SQSTM1;CD36;IPO13;CD68;CDK1;CDH1	4.53342	4.17e-16
GOBP_NEGATIVE_REGULATION_OF_REPRODUCTIVE_PROCESS	ADA;CDKN1B;DUSP1;NR5A1;AMH;GJA1;HPGDS;IGF1;IL1A;LIF;PAEP;SERPINF1;WNT4;BCL2L1;BMP4;BMP7;SNAI1;SOD1;TIMP1;WT1;ZP3	14.3842	4.23e-16
GOBP_NEGATIVE_REGULATION_OF_LYMPHOCYTE_APOPTOTIC_PROCESS	ADA;KIFAP3;FOXP1;HIF1A;IL2;IL7R;IDO1;MIF;PDCD1;BCL2;BCL6;CCL5;BMP4;IRS2;BCL10;CD74	28.077	4.73e-16
GOBP_PROTEIN_LOCALIZATION_TO_CHROMOSOME	CTCF;H4-16;ESR1;EZH2;MSH2;PLK1;H4C15;RB1;BRCA2;TERF1;TERT;XRCC4;H4C9;H4C1;H4C4;H4C6;H4C12;H4C11;H4C3;H4C8;H4C2;H4C5;H4C13;H4C14;CDK1	10.304	4.81e-16
GOBP_PALLIUM_DEVELOPMENT	CDK6;CRK;CTNNB1;ARX;EGFR;EMX2;EZH2;PLCB1;GLI3;GSK3B;H2AX;HDAC1;HIF1A;HSD3B1;HSD3B2;IGF1R;LAMB1;MAS1;MDK;NTRK2;PSEN1;PTEN;BAX;SLC2A1;SRD5A1;SRD5A2;XRCC1;CASP3;WNT3A;SLIT2	7.75379	5.06e-16
GOBP_LIPID_HOMEOSTASIS	CEBPA;CETP;TTC39B;AKR1C1;SIRT1;NR5A2;MYLIP;ACACA;APOA2;APOE;IL18;LIPC;MIR132;MIR148A;MIR27B;MIR30C1;MIR33A;MIR34A;TREM2;POLD1;PPARG;RBP1;MIR33B;TSPO;USF2;XBP1;IRS2;LIPG;HDAC9;NR1D2	7.75379	5.06e-16
GOBP_T_CELL_SELECTION	CCR7;MTOR;GATA3;GLI3;TBX21;IL6;IL12B;IL12RB1;IL15;FOXP3;IL23A;PTPRC;BCL2;BRAF;STAT3;STAT6;CARD11;CD74	20.1344	5.26e-16
GOBP_ACTIVATED_T_CELL_PROLIFERATION	EPO;CADM1;CD274;HMGB1;IGF1;IL2;IL2RA;IL12B;IL12RB1;IL18;IDO1;ARG1;LGALS9;MIR181C;MIR21;FOXP3;IL23A;CASP3	20.1344	5.26e-16
GOBP_POSITIVE_REGULATION_OF_NITRIC_OXIDE_METABOLIC_PROCESS	KLRC4-KLRK1;AGT;AGTR2;EDN1;AIF1;AKT1;KLRK1;IFNG;IL1B;INSR;SMAD3;PTGS2;SOD2;TLR4;TNF;TRPV1;CD36	23.2231	5.71e-16
GOBP_POSITIVE_REGULATION_OF_MACROPHAGE_MIGRATION	CSF1;CSF1R;IL34;CX3CR1;MSTN;MDK;MMP14;TREM2;MAPK1;MAPK3;RARRES2;CCL5;CX3CL1;THBS1	42.9042	6.38e-16
GOBP_POSITIVE_REGULATION_OF_LIPASE_ACTIVITY	PHB2;ADRA1A;AGT;AGTR1;EDNRA;EGFR;ESR1;FGF2;FGFR2;FLT1;ANG;CCN1;RHOC;P2RY6;PDGFRA;PDGFRB;CCL5;SELE;LPAR2;CD86	15.3979	7.32e-16
GOBP_GLIAL_CELL_DEVELOPMENT	CDK6;NDRG1;ERCC2;AKT1;DICER1;IFNG;IFNGR1;IL1B;IL6;ILK;KRAS;HES5;LYN;MIR142;MIR181C;MDK;NTRK2;TREM2;PSEN1;PTEN;SOD1;TLR2;TLR4;TNF;VIM	10.078	7.41e-16
GOBP_NEGATIVE_REGULATION_OF_ENDOTHELIAL_CELL_PROLIFERATION	FLT1;APOE;IL12B;MIR126;MIR132;MIR21;MIR22;MIR29C;MIR34A;MIR342;NGFR;DLL4;PPARG;PRL;MIR503;MIR483;CCL2;NR2F2;TGFBR1;THBS1;TNF	13.8709	7.63e-16
GOBP_CYTOKINE_PRODUCTION_INVOLVED_IN_INFLAMMATORY_RESPONSE	SIRPA;MAPK14;EPHB2;EZH2;F2;PDCD4;HIF1A;IL6;IL17A;LEP;MIR17;MIR21;NOS2;MIR378A;IL17D;TREM2;PPARA;STAT3;TLR4;TNF;IL1R2	13.8709	7.63e-16
GOBP_REGULATION_OF_GLUCOSE_TRANSMEMBRANE_TRANSPORT	MAPK14;ACE;EDN1;EDNRA;AKT1;GH1;IGF1;IL1B;INSR;LEP;MIR143;NFE2L2;ENPP1;PRKCB;BRAF;TERT;TNF;C3;IRS2;PEA15;ADIPOQ	13.8709	7.63e-16
GOBP_NEGATIVE_REGULATION_OF_MAP_KINASE_ACTIVITY	AGT;DUSP1;NUP62;PTPN22;GBA;PDCD4;GSTP1;APOE;IL1B;LYN;PIK3CB;PPARG;SFRP1;SFRP2;BMP4;BMP7;UCHL1;HYAL2;ADIPOQ	17.1202	8.28e-16
GOBP_AORTIC_VALVE_MORPHOGENESIS	HEY1;GATA3;NOS3;NOTCH1;DLL4;RB1;ROCK1;BMP4;SLIT3;SNAI2;SNAI1;SOX9;TGFB1;TWIST1;SLIT2	32.4912	8.71e-16
GOBP_POSITIVE_REGULATION_OF_MITOTIC_CELL_CYCLE	CDK4;PHB2;CYP1A1;EGFR;EIF4EBP1;AIF1;AKT1;PLCB1;POLDIP2;TMOD3;ANXA1;APEX1;MIR214;MDM2;MECP2;PRKCA;RB1;CCND1;SMOC2;BRCA2;ADAM17;TERT;TFDP1;CCNB1;CDK1;CDC6	9.3692	8.86e-16
GOBP_POSITIVE_REGULATION_OF_REPRODUCTIVE_PROCESS	CIB1;CTNNB1;FGF9;PLCB1;NR5A1;HDAC2;INHBA;INSR;AR;OXTR;WNT4;RETN;BAX;SOX9;SRC;SRY;TACR1;VEGFA;VIP;WT1;ZP3;ACVR1B	12.5244	9.06e-16
GOBP_NEGATIVE_REGULATION_OF_BINDING	CDKN1A;LRRK2;CRMP1;ACE;AKT1;DKK1;HEY1;GSK3B;HDAC2;IFIT1;IL10;JUN;MIR148A;MIR27B;MAP2;NFKBIA;PPARA;MAPK3;MAPK8;PSEN1;B2M;BAX;ACTB;ROCK1;SLPI;ARHGAP28;HMGA2;ADIPOQ;HAND2	7.9304	9.14e-16
GOBP_NEGATIVE_REGULATION_OF_MITOTIC_CELL_CYCLE	CDKN1A;CDKN1B;CTNNB1;DUSP1;EZH2;FANCD2;BIRC5;IL10;INHBA;MIR195;MIR21;MIR29C;MIR30C2;MDM2;MSH2;MUC1;ATM;PLK1;PTEN;MIR451A;RB1;CCND1;BCL2;BCL6;CCL2;BMP4;BMP7;BRCA1;BTG1;TNF;TP53;XRCC3;CCNB1;CDK1;CDC6	6.19053	9.15e-16
GOBP_NEGATIVE_REGULATION_OF_BLOOD_VESSEL_ENDOTHELIAL_CELL_MIGRATION	AGTR2;FGF2;ANGPT2;HMGB1;APOE;MIR132;MIR20A;MIR200B;MIR200C;MIR204;MIR22;MIR29C;MECP2;NOTCH1;DLL4;PPARG;MIR503;MIR483;TGFB1;THBS1;TNF	13.6276	1.02e-15
GOBP_POSITIVE_REGULATION_OF_CARBOHYDRATE_METABOLIC_PROCESS	PPARGC1A;EGF;AKT1;FOXO1;SIRT1;MTOR;GPER1;HIF1A;IFNG;IGF1;INSR;LHCGR;ARNT;MIR210;MAS1;NFKB1;P2RY6;PPARA;PSEN1;SRC;IRS2	13.6276	1.02e-15
GOBP_NEGATIVE_REGULATION_OF_ERK1_AND_ERK2_CASCADE	SIRPA;CSK;DUSP6;EPHB2;FBLN1;GPER1;GSTP1;LIF;LYN;MIR200C;MIR21;SMAD4;ERRFI1;PTEN;MIR503;SEMA6A;PTPRC;TIMP3;TLR4;EZR;ADIPOQ	13.6276	1.02e-15
GOBP_PROTEIN_CATABOLIC_PROCESS	CDKN1B;CEBPA;HPSE;LRRK2;CPB2;CTNNB1;EGF;EGFR;AKT1;FOXO1;NEDD4L;SIRT1;MTOR;RNF19A;GBA;CCDC22;MYLIP;GSK3B;TBX21;ANXA2;BIRC2;IFI27;IFNG;APOE;IL1B;IL10;USP17L2;SMAD3;SMAD4;MDM2;MME;MMP2;MMP12;ATM;NFE2L2;NOS2;NOTCH1;PAPPA;HERC5;PLK1;TREM2;PPT1;VPS11;PSEN1;PSMD2;PSMD9;PSMD10;PTEN;RELA;ROCK1;SKP2;SMARCC1;SOX9;STX5;BTK;TGFB1I1;TIMP1;TIMP2;TIMP3;TIMP4;TNF;TNFRSF1B;UCHL1;EZR;VIP;XBP1;BAG6;RNF34;AXIN1;CASP3…	3.08765	1.11e-15
GOBP_ORGANIC_ANION_TRANSPORT	ABCC4;CFTR;SLCO6A1;ACE;AKR1C1;DRD2;AGT;EDN1;SLC7A8;GJA1;ANXA1;IL1A;IL1B;AQP9;ITGB1;ARG1;LEP;LHCGR;MIR33A;MIF;NOS2;NTRK2;PLA2G2A;SLC52A1;PSEN1;PTGS2;RGS4;SLC1A1;SLC2A1;SLC2A3;SSTR4;TNF;TRH;TRPV1;SLC38A1;NR0B2;CASR;SLC16A6;SLC33A1;SFXN1;CD36;PTGES;CD47	4.89949	1.12e-15
GOBP_POSITIVE_REGULATION_OF_ALPHA_BETA_T_CELL_DIFFERENTIATION	ADA;GLI3;ANXA1;HLA-DRB1;IFNG;IHH;IL12B;IL12RB1;IL18;LGALS9;MIR21;MYB;FOXP3;IL23A;CCL19;RUNX1;RUNX3;CD86	18.9838	1.16e-15
GOBP_POSITIVE_REGULATION_OF_LIPID_TRANSPORT	CETP;CRH;CYP19A1;EDN1;SIRT1;ANXA2;APOE;IL1A;IL1B;FASLG;MIF;NFKBIA;TREM2;PON1;PPARG;RETN;RXRA;SPP1;SSTR4;ADIPOQ;LIPG;PTGES	12.3389	1.18e-15
GOBP_NEGATIVE_REGULATION_OF_ION_TRANSPORT	LILRB2;LILRB1;CNR1;CRHR1;ADRA2B;ACE;DRD2;EPHB2;EPO;NEDD4L;REM1;GSTM2;LEP;MIR200C;MIR33A;MIR34A;MAOB;MMP9;NOS1;NOS3;PTGS2;BCL2;RGS4;WNK1;STC1;TNF;TRH;TWIST1;VIP	7.81528	1.27e-15
GOBP_ADRENAL_GLAND_DEVELOPMENT	CRH;CRHR1;CYP1B1;NR5A1;NR3C1;INSR;SMAD2;SMAD3;SMAD4;MDK;PDGFRA;WNT4;TSPO;WT1	39.6087	1.29e-15
GOBP_APOPTOTIC_PROCESS_INVOLVED_IN_MORPHOGENESIS	BCL2L11;CCN1;NOTCH1;PAX2;BAX;BMP4;BMP7;HNF1B;TGFB2;TNFRSF1A;TNFRSF1B;VDR;PAX8;HAND2	39.6087	1.29e-15
GOBP_SEQUESTERING_OF_CALCIUM_ION	CCR5;CCR7;DRD2;F2;F2R;FGF2;GPER1;GSTM2;FASLG;IL13;CXCL10;ITGB3;LHCGR;LYN;CXCL9;NOS1;P2RY6;PSEN1;PTPRC;BAX;CCL19;CCL21;CX3CL1;THY1;TRPV1;CD19	9.19034	1.31e-15
GOBP_MYELOID_CELL_APOPTOTIC_PROCESS	CDKN2A;EPO;SIRT1;ANXA1;IL6;CXCR2;KITLG;MIF;PIK3CB;PIK3CD;PTEN;BCL2;SNAI2;ADAM17;THRA;ADIPOQ	25.6305	1.32e-15
GOBP_VASCULAR_WOUND_HEALING	HPSE;GATA2;KDR;MIR200B;MIR34A;SERPINE1;MIR451A;SMOC2;TNF;VEGFA;XBP1;CXCR4;NDNF	53.0958	1.34e-15
GOBP_STEROL_METABOLIC_PROCESS	CEBPA;CETP;CFTR;CYP1A2;CYP1B1;CYP3A4;TTC39B;CYP11A1;CYP19A1;CYP26A1;FGF1;GBA;APOA2;APOE;IL4;LBR;LEP;LEPR;LIPC;LIPE;MIR30C1;HSD17B7;PON1;SOD1;STAR;SULT2A1;NR0B2;CAT	8.19365	1.37e-15
GOBP_POSITIVE_REGULATION_OF_SIGNALING_RECEPTOR_ACTIVITY	ADRA2B;HBEGF;EDN1;EGF;EPHB2;GREM1;HDAC1;HDAC2;HIF1A;IFNG;IL10;ITGB1;AREG;CCL2;ADAM17;CCR2;NRP1	21.621	1.39e-15
GOBP_REGULATION_OF_MYELOID_CELL_APOPTOTIC_PROCESS	CDKN2A;EPO;SIRT1;ANXA1;CXCR2;KITLG;MIF;PIK3CB;PIK3CD;PTEN;BCL2;SNAI2;ADAM17;THRA;ADIPOQ	30.7126	1.56e-15
GOBP_RESPONSE_TO_ACID_CHEMICAL	CDKN1B;COL1A1;CCN2;DNMT1;DNMT3A;EDN1;EGFR;SH3BP4;MTOR;IGF1R;AQP2;ARG1;LYN;MMP2;MIR342;NTRK2;PCNA;PDGFRA;PIK3CA;BCL2L1;SST;ZEB1;TNF;VEGFA;XBP1;CASP3	9.10344	1.59e-15
GOBP_CARBOHYDRATE_TRANSPORT	MAPK14;ACE;EDN1;EDNRA;AKT1;GH1;IGF1;IL1B;AQP1;AQP2;INSR;AQP9;LEP;MIR143;NFE2L2;ENPP1;PRKCB;SLC2A1;SLC2A3;SLC2A4;BRAF;TERT;TNF;C3;EZR;IRS2;PEA15;ADIPOQ	8.12953	1.63e-15
GOBP_REGULATION_OF_MACROPHAGE_ACTIVATION	CEBPA;LRRK2;HSPD1;IL4;IL6;IL10;IL13;MIR142;MIR145;MIF;CD200;ATM;TREM2;PTPRC;CX3CL1;THBS1;TLR4;IL33;CD74	16.3239	1.65e-15
GOBP_POSITIVE_REGULATION_OF_IMMUNOGLOBULIN_PRODUCTION	PHB2;EPHB2;TBX21;IL2;IL4;IL6;IL10;IL13;MLH1;MSH2;PTPRC;IL21;STAT6;BTK;TGFB1;XBP1;IL33;CD86	18.4565	1.69e-15
GOBP_REGULATION_OF_RESPONSE_TO_DNA_DAMAGE_STIMULUS	BRD8;PARP1;DDX5;EGFR;ERCC1;ERCC6;FOXM1;SIRT1;ANKRD1;H2AX;HMGB1;MDM2;MIF;MUC1;MYC;ATM;OGG1;PCNA;ACKR3;PSMD10;BCL2;BCL2L1;ACTB;CXCL12;SFRP2;SNAI2;SMARCC1;SNAI1;BRCA1;BRCA2;TP53;TPT1;TWIST1;XRCC1;HMGA2;ARID1A;IER3;CD44;CD74	5.34254	1.77e-15
GOBP_OLIGODENDROCYTE_DIFFERENTIATION	CSK;IL34;CTNNB1;ERBB2;ERCC2;MTOR;TNFRSF21;GLI3;HDAC1;HDAC2;HES5;LYN;MDK;NOTCH1;NTRK2;PTEN;PTN;SOX9;TLR2;TNFRSF1B;VTN;CXCR4;IL33	11.0613	1.91e-15
GOBP_RESPONSE_TO_CAMP	CARM1;CFTR;COL1A1;CYP1B1;AHR;FOS;GATA6;APEX1;BIRC2;AQP1;AQP9;AREG;KCNQ1;PIK3CG;REN;SDC1;SRD5A1;STC1;BSG;EZR;WT1;ADIPOQ	11.9754	1.97e-15
GOBP_DEFENSE_RESPONSE_TO_BACTERIUM	KLRC4-KLRK1;NOD1;CXCL13;CRP;DEFB4A;F2;F2RL1;FGA;KLRK1;FPR2;FOXP1;ANG;HP;RBPJ;IL1B;IL6;IL7R;AQP1;IL10;IL12B;IL17A;IL18;LGALS4;LTA;LTF;MBL2;MPO;NOS2;SERPINE1;IL23A;PLA2G2A;TREM2;RARRES2;RNASE3;SHC1;SLPI;ADAM17;TLR2;TLR3;TLR4;TNF;TNFRSF1A;CD36	4.81084	1.99e-15
GOBP_MACROPHAGE_CHEMOTAXIS	CSF1;CSF1R;IL34;CYP19A1;MSTN;LGALS3;MDK;MIF;MMP2;MAPK1;MAPK3;RARRES2;CCL2;CCL5;THBS1;C5	24.5834	2.14e-15
GOBP_DNA_BIOSYNTHETIC_PROCESS	CDKN1A;CCN2;CTNNB1;CYP1B1;FGF2;SIRT1;POLDIP2;GREM1;ANKRD1;HGF;LOX;MYC;ATM;PCNA;PDGFA;PDGFRB;POLD1;POLE;MAPK1;MAPK3;MAP2K7;SMOC2;SRC;TERF1;TERT;TFDP1;TNF;TP53;STN1;USP10;ADIPOQ	6.95164	2.33e-15
GOBP_STRIATED_MUSCLE_CELL_PROLIFERATION	YAP1;MAPK14;FGF2;FGF9;FGFR2;FOS;GATA6;MSTN;GLI1;ANGPT1;HGF;RBPJ;MIR200B;MIR204;NOTCH1;PTEN;SRC;TGFB2;TGFBR1;RUNX1;CDK1	12.9451	2.35e-15
GOBP_CELL_SUBSTRATE_JUNCTION_ORGANIZATION	EPHA3;FN1;POLDIP2;GREM1;ITGA2;ITGA5;ITGB3;KDR;SMAD3;MMP14;WNT4;PTEN;BCL2;ROCK1;SDC4;SFRP1;SRC;TEK;THBS1;THY1;VEGFA;ACTN1;NRP1	10.9201	2.42e-15
GOBP_MAINTENANCE_OF_LOCATION_IN_CELL	CCR5;CCR7;DRD2;AKT1;ALB;F2;F2R;FGF2;NR5A1;GPER1;GSTM2;HK1;APOE;FASLG;IL13;CXCL10;ITGB3;LHCGR;LYN;CXCL9;NOS1;P2RY6;PSEN1;PTPRC;BAX;CCL19;CCL21;CX3CL1;TSPO;THY1;TXN;TRPV1;CD19	6.40584	2.45e-15
GOBP_REGULATION_OF_INTRACELLULAR_STEROID_HORMONE_RECEPTOR_SIGNALING_PATHWAY	YAP1;CARM1;PHB2;PARP1;DDX5;SIRT1;GHRHR;FOXP1;HDAC1;AR;PAK1;MED1;VPS11;SFRP1;SKP2;SRC;BRCA1;TCF21;CLOCK;NCOR1	14.2147	2.51e-15
GOBP_NEGATIVE_REGULATION_OF_CYSTEINE_TYPE_ENDOPEPTIDASE_ACTIVITY	AKT1;HGF;NR4A1;BIRC2;BIRC3;BIRC5;IL9;AQP1;LTF;MIRLET7B;MIR17;MMP9;PAX2;PTGS2;RAF1;SFRP2;SRC;THBS1;TNF;VEGFA;RNF34;CD44	11.8016	2.53e-15
GOBP_MESODERMAL_CELL_DIFFERENTIATION	FGFR2;DKK1;GJA1;HOXA11;INHBA;ITGA2;ITGB1;ITGB3;MIR145;MIR200C;PAX2;SFRP2;BMP4;HMGA2;WNT3A	29.0614	2.72e-15
GOBP_POSITIVE_REGULATION_OF_ANIMAL_ORGAN_MORPHOGENESIS	CSF1;CTNNB1;EDN1;FGF1;FGF2;DKK1;GATA3;GDNF;HOXA11;AR;NGFR;WNT4;BMP4;SOX9;WNT3A	29.0614	2.72e-15
GOBP_MULTICELLULAR_ORGANISMAL_RESPONSE_TO_STRESS	CRHR1;DPP4;EPHB2;AKT1;MTOR;APOE;IDO1;MDK;MECP2;NOS1;P2RX3;PTEN;BCL2;SLC1A1;TAC1;TACR1;THBS1;TSPO;UCN;TRPV1;CALCA	12.7305	3.08e-15
GOBP_NEGATIVE_REGULATION_OF_RESPONSE_TO_DNA_DAMAGE_STIMULUS	ERCC1;ERCC6;SIRT1;MDM2;MIF;MUC1;OGG1;ACKR3;PSMD10;BCL2;BCL2L1;CXCL12;SFRP2;SNAI2;SNAI1;TPT1;TWIST1;XRCC1;HMGA2;CD44;CD74	12.7305	3.08e-15
GOBP_INTERLEUKIN_17_PRODUCTION	IFNG;IL2;IL6;IL12B;IL15;IL18;MIR181C;MIR20A;FOXP3;IL23A;MIR146B;IL21;CCL1;BTK;TGFB1;TLR4;TYK2	20.2258	3.2e-15
GOBP_NEGATIVE_REGULATION_OF_T_CELL_DIFFERENTIATION	CTLA4;ERBB2;GLI3;TBX21;ANXA1;HMGB1;IHH;IL2;IL4;MIR21;MDK;FOXP3;BCL6;BMP4;RUNX1;RUNX3;CD74	20.2258	3.2e-15
GOBP_REGULATION_OF_ENDOTHELIAL_CELL_DIFFERENTIATION	CTNNB1;PLCB1;IL1B;MIR200C;MIR21;MIR34A;NOTCH1;NOTCH4;ROCK1;BMP4;ZEB1;BTG1;CLDN5;TNF;TNFRSF1A;VEGFA;S1PR2	20.2258	3.2e-15
GOBP_NEGATIVE_REGULATION_OF_BLOOD_PRESSURE	ABCC9;CNR1;ADRA1A;DRD2;AGTR2;MIR17;NOS1;NOS2;NOS3;PPARA;SOD2;TNF;UCN;VEGFC;TRPV1;CALCA;ADIPOQ	20.2258	3.2e-15
GOBP_REGULATION_OF_NEUTROPHIL_MIGRATION	DNM1L;OLFM4;CCR7;DPP4;EDN1;DAPK2;IL1A;IL1R1;CXCL8;CXCR2;RHOG;MDK;IL23A;CCL19;CCL21;SLIT2;CD74	20.2258	3.2e-15
GOBP_POST_EMBRYONIC_DEVELOPMENT	BCL2L11;SEMA3C;CYP1A2;ERCC1;ERCC2;FBN1;FGFR2;MTOR;GATA3;KDR;SMAD2;MECP2;ATM;PSEN1;BAX;BCL2;SELENOP;BMP4;SOD2;TGFBR1;VEGFA;ACVR2B	11.6327	3.24e-15
GOBP_GLANDULAR_EPITHELIAL_CELL_DIFFERENTIATION	CDK6;YAP1;AGR2;CTNNB1;AKT1;FGF2;FGFR2;NR5A2;GATA2;GATA6;GSK3B;HIF1A;IL13;NOTCH1;PGR;WNT4;RARB;BMP4;SOX9;CLOCK	13.9467	3.37e-15
GOBP_SUPEROXIDE_METABOLIC_PROCESS	CRP;AGT;EDN1;F2RL1;FPR2;GSTP1;ITGAM;MIR21;MIR27B;MPO;NFE2L2;NOS2;NOS3;SLC1A1;BMP7;SOD1;SOD2;TGFB1;TYROBP;CD36	13.9467	3.37e-15
GOBP_ENDOCARDIAL_CUSHION_MORPHOGENESIS	HEY1;RBPJ;SMAD4;MDM2;NOS3;NOTCH1;BMP4;BMP7;SNAI2;SNAI1;SOX9;TGFB1;TGFB2;TGFB3;TGFBR1;TWIST1	23.5858	3.43e-15
GOBP_REGULATION_OF_CARBOHYDRATE_BIOSYNTHETIC_PROCESS	PPARGC1A;EGF;AKT1;FOXO1;SIRT1;GPER1;NR3C1;GSK3B;IGF1;INSR;LEP;LEPR;LHCGR;MIR195;MAS1;MST1;NFKB1;P2RY6;ENPP1;PPARA;TGFB1;IRS2;ADIPOQ	10.6476	3.82e-15
GOBP_CELLULAR_RESPONSE_TO_STARVATION	CDKN1A;LRRK2;COMT;ALB;FOXO1;FOXO3;SIRT1;FOS;MTOR;GBA;IGF1R;FAS;NFE2L2;WNT4;KRT20;PPARA;MAPK1;MAPK3;MAPK8;BCL2;SFRP1;SLC2A1;SRD5A1;KLF10;TP53;XBP1;MAP1LC3B;AKR1C3;BECN1	7.43749	3.91e-15
GOBP_SOMATIC_DIVERSIFICATION_OF_IMMUNE_RECEPTORS	ADAR;ERCC1;MSH6;TBX21;HMGB1;HSPD1;IL2;IL4;IL10;MLH1;MSH2;ATM;FOXP3;PTPRC;BCL6;DCLRE1C;STAT6;TCF3;TGFB1;XRCC4;CD40LG	12.5234	4.02e-15
GOBP_VASOCONSTRICTION	CHRM3;ADM;CRP;ADRA1A;ADRA2B;ACE;AGT;AGTR1;EDN1;EDNRA;F2R;FGA;LEP;MIR21;MMP2;OXTR;PTGS2;ACTA2;SLC6A4;TACR1;CASR	12.5234	4.02e-15
GOBP_MIRNA_MEDIATED_GENE_SILENCING_BY_INHIBITION_OF_TRANSLATION	MIR100;MIR10B;MIR132;MIR145;MIR148A;MIR17;MIR181C;MIR20A;MIR200B;MIR200C;MIR204;MIR205;MIR21;MIR210;MIR27B;MIR29C;MIR31;MIR135B;MIR378A;MIR503;MIR483;ZFP36	11.4701	4.14e-15
GOBP_IMMUNOGLOBULIN_PRODUCTION_INVOLVED_IN_IMMUNOGLOBULIN_MEDIATED_IMMUNE_RESPONSE	ERCC1;MSH6;TBX21;HLA-DPB1;HLA-DQB1;HLA-DRB1;HSPD1;IL2;IL4;IL10;MLH1;MSH2;FOXP3;B2M;PTPRC;BCL6;STAT6;BTK;TGFB1;CD40LG	13.6885	4.51e-15
GOBP_CARDIAC_VENTRICLE_DEVELOPMENT	SEMA3C;EDNRA;FGFR2;HEY1;GATA3;HIF1A;HOXA13;CCN1;RBPJ;SMAD4;MDM2;NOS3;NOTCH1;DLL4;MED1;SALL4;SFRP2;BMP4;SLIT3;TGFB1;TGFB2;TGFBR1;PAX8;SLIT2;HAND2	9.17959	4.65e-15
GOBP_POSITIVE_REGULATION_OF_VASCULAR_ENDOTHELIAL_GROWTH_FACTOR_PRODUCTION	HPSE;CYP1B1;HIF1A;IL1A;IL1B;IL6;ARNT;MIR132;SULF2;PTGS2;BRCA1;TGFB1;C3;C5	34.338	4.76e-15
GOBP_REGULATION_OF_GENE_SILENCING_BY_RNA	ADAR;DDX5;EGFR;ELAVL1;ESR1;IL6;POU5F1;PPARG;MAP2K1;BMP4;STAT3;TERT;TGFB1;TNF;TP53;ZFP36;NCOR1	19.5937	4.77e-15
GOBP_POSITIVE_REGULATION_OF_DNA_BINDING	PARP1;CTNNB1;EGF;ERCC2;GATA3;HMGB1;IFNG;IGF1;ITGA2;MMP9;NGF;NME1;PPARG;RB1;TGFB1;TWIST1;TXN;HAND2	17.0368	5.03e-15
GOBP_LEUKOCYTE_ADHESION_TO_VASCULAR_ENDOTHELIAL_CELL	CX3CR1;ETS1;IL6;ITGB1;LEP;MIR141;MIR21;MIR31;MDK;RELA;ROCK1;CCL21;CCL25;CXCL12;SELE;SELL;TNF;VCAM1	17.0368	5.03e-15
GOBP_FATTY_ACID_BIOSYNTHETIC_PROCESS	CYP1A1;CYP1A2;CYP3A4;EDN1;SIRT1;ALOX15;HPGDS;GPX4;GSTM1;GSTM2;GSTP1;ANXA1;ACACA;IL1B;LIPC;MIR132;MIR204;MIR30C1;MIR33A;MIF;PTGS2;BRCA1;XBP1;AKR1C3;LIPG;TECR;PTGES;CD74	7.70739	5.24e-15
GOBP_CHRONIC_INFLAMMATORY_RESPONSE	CXCL13;CYP19A1;IL4;IL10;IDO1;LTA;FOXP3;CCL5;CCL11;THBS1;TNF;VCAM1	62.9487	5.39e-15
GOBP_REGULATION_OF_CELL_FATE_COMMITMENT	FGF2;DKK1;TBX21;HDAC1;HDAC2;IL12B;IL12RB1;AR;IL23A;SFRP2;BMP4;FZD7;WNT3A;MTA1;MTA2;GDF3	22.6784	5.4e-15
GOBP_REGULATION_OF_NITRIC_OXIDE_SYNTHASE_ACTIVITY	NOD1;CNR1;AGTR2;EGFR;AKT1;HIF1A;APOE;IL1A;IL1B;LEP;MIR132;MIR27B;PIK3CB;S100A1;TERT;TNF	22.6784	5.4e-15
GOBP_APOPTOTIC_PROCESS_INVOLVED_IN_DEVELOPMENT	BCL2L11;CCN1;NOTCH1;PAX2;BAX;BMP4;BMP7;SLIT3;HNF1B;TGFB2;TNFRSF1A;TNFRSF1B;VDR;PAX8;SLIT2;HAND2	22.6784	5.4e-15
GOBP_PHOSPHOLIPASE_C_ACTIVATING_G_PROTEIN_COUPLED_RECEPTOR_SIGNALING_PATHWAY	LTB4R;ADRA1A;CX3CR1;DRD2;AGT;AGTR1;S1PR1;EDN1;ESR1;F2;F2R;F2RL1;FPR1;FPR2;CXCR2;KISS1;LHCGR;OPRM1;P2RY6;TACR1;VIP;CALCA;CASR	10.388	5.97e-15
GOBP_ANTERIOR_POSTERIOR_PATTERN_SPECIFICATION	TSHZ1;CDX1;SEMA3C;CTNNB1;EMX2;DKK1;HEY1;GLI3;FOXA2;HOXA10;HOXA11;HOXB4;RBPJ;HES5;SMAD2;SMAD3;SMAD4;ATM;NOTCH1;PSEN1;SFRP1;SFRP2;BMP4;HNF1B;TDGF1;NR2F2;TGFBR1;TP53;WT1;WNT3A;ACVR2B;GDF3	6.40731	6.31e-15
GOBP_REGULATION_OF_PLASMA_LIPOPROTEIN_PARTICLE_LEVELS	CETP;CSK;AGT;AGTR1;MYLIP;ANXA2;APOA2;APOE;LIPC;MIR148A;MIR17;MIR27B;MIR33A;MPO;PLA2G2A;TREM2;PON1;MIR33B;ADIPOQ;LIPG;CD36	12.1359	6.77e-15
GOBP_VASCULAR_ENDOTHELIAL_GROWTH_FACTOR_SIGNALING_PATHWAY	DCN;FLT1;IL12B;KDR;MIR21;MIR342;PDGFRA;PDGFRB;PGF;PIK3CA;PIK3CB;PIK3CD;SEMA6A;SMOC2;VEGFA;VEGFC;NRP1	18.9999	7.05e-15
GOBP_POSITIVE_REGULATION_OF_EXTRINSIC_APOPTOTIC_SIGNALING_PATHWAY	AGT;AGTR2;GPER1;PDIA3;INHBA;PPP2R1A;PTEN;PTPRC;SFRP1;BMPR1B;THBS1;TIMP3;TNF;PEA15;HYAL2;TNFSF10;BCL10	18.9999	7.05e-15
GOBP_IMMUNOGLOBULIN_PRODUCTION	PHB2;FCRL3;EPHB2;ERCC1;MSH6;TBX21;HLA-DPB1;HLA-DQB1;HLA-DRB1;HSPD1;IL2;IL4;IL6;IL10;IL13;MLH1;MSH2;FOXP3;B2M;PTPRC;IL21;BCL6;STAT6;TCF3;BTK;TGFB1;TNF;XBP1;XRCC4;IL33;CD86;CD40LG	6.37289	7.21e-15
GOBP_POSITIVE_REGULATION_OF_CELL_JUNCTION_ASSEMBLY	CLDN3;AGT;EPHB2;POLDIP2;IL1RAP;IL17A;KDR;SMAD3;NTRK2;OXTR;WNT4;PTPRD;ROCK1;BDNF;SDC4;SFRP1;TEK;THY1;CLDN5;VEGFA;WNT7A;NRP1;CLDN1	10.2639	7.43e-15
GOBP_MONOCYTE_DIFFERENTIATION	CDK6;CSF1;CSF1R;CSF2;IL34;FOXP1;HLA-DRB1;JUN;MYC;PPARG;MED1;BMP4;VEGFA;DCSTAMP;CD74	26.3004	7.76e-15
GOBP_NEGATIVE_REGULATION_OF_B_CELL_ACTIVATION	CTLA4;TNFRSF21;ID2;IL10;INHA;INHBA;LYN;ATM;FOXP3;PTEN;BCL6;SFRP1;BTK;TYROBP;CASP3	26.3004	7.76e-15
GOBP_DIENCEPHALON_DEVELOPMENT	CREB1;CTNNB1;ARX;DRD2;FGF2;GATA2;GHRH;GHRHR;GLI1;RBPJ;WNT4;BAX;BMP4;SOX2;SRD5A1;SRD5A2;NDNF;NRP1;SEMA3E;CDH1	13.1995	7.93e-15
GOBP_MESODERM_MORPHOGENESIS	FGFR2;DKK1;GJA1;HOXA11;INHBA;ITGA2;ITGB1;ITGB3;MIR145;MIR200C;SMAD2;SMAD3;PAX2;SFRP2;BMP4;BMP7;SNAI1;HMGA2;AXIN1;WNT3A	13.1995	7.93e-15
GOBP_RESPONSE_TO_TESTOSTERONE	EDN1;EPO;SIRT1;GBA;MSTN;FOXP1;HOXA10;HOXA11;HOXA13;IGF1R;AR;SPP1;SRD5A1;SRD5A2;THBS1;TSPO	21.8383	8.38e-15
GOBP_POSITIVE_REGULATION_OF_GLIAL_CELL_DIFFERENTIATION	IL34;DICER1;MTOR;HDAC1;HDAC2;ID2;LIF;MIR142;MDK;NOTCH1;PTN;TGFB1;TLR2;TNFRSF1B;CXCR4;IL33	21.8383	8.38e-15
GOBP_REGULATION_OF_SMOOTH_MUSCLE_CELL_DIFFERENTIATION	CTH;DNMT1;FGF9;FGFR2;SIRT1;PDCD4;GPER1;MIR100;MIR145;MIR21;MIR22;MIR34A;MECP2;BMP4;SOD2;ZEB1	21.8383	8.38e-15
GOBP_LUNG_EPITHELIUM_DEVELOPMENT	YAP1;AGR2;CREB1;CTNNB1;FGFR2;GATA6;RBPJ;IL13;KRAS;ERRFI1;MAP2K1;BMP4;SOX9;THRA;AIMP2;CDC42	21.8383	8.38e-15
GOBP_REGULATION_OF_PHOSPHOLIPASE_C_ACTIVITY	RASGRP1;PHB2;ADRA1A;AGT;EDNRA;EGFR;ESR1;FGF2;FLT1;ANG;P2RY6;PDGFRA;PDGFRB;SELE;LPAR2;CD86	21.8383	8.38e-15
GOBP_REGULATION_OF_PROTEIN_TYROSINE_KINASE_ACTIVITY	CSF1R;IL34;ADRA1A;ACE;AGT;HBEGF;EGF;EGFR;ERCC6;GREM1;ITGB3;AREG;ERRFI1;PSEN1;PTPRC;CCL5;SHC1;SRC;ADAM17;THY1;HYAL2;WNT3A	11.0008	8.46e-15
GOBP_NEGATIVE_REGULATION_OF_CELL_PROJECTION_ORGANIZATION	YAP1;CARM1;SEMA3C;CIB1;LRRK2;CRMP1;EPHB2;FKBP4;DKK1;MYLIP;HDAC2;APOE;MIR210;MIR214;TACSTD2;MAP2;PSEN1;B2M;PTEN;SEMA6A;CCL21;GORASP1;SPP1;THY1;VIM;NRP1;WNT3A;SLIT2;SEMA3E;CDH1	6.8459	9.19e-15
GOBP_CARDIAC_SEPTUM_DEVELOPMENT	SEMA3C;FGFR2;PLXND1;HEY1;GATA3;GATA6;HOXA13;CCN1;RBPJ;SMAD4;MDM2;NOS3;NOTCH1;SALL4;BMP4;BMP7;SLIT3;TGFB2;TGFBR1;TP53;PAX8;NRP1;SLIT2	10.1379	9.23e-15
GOBP_STRIATED_MUSCLE_CELL_APOPTOTIC_PROCESS	AGT;KIFAP3;GATA6;CXCR2;MIR145;MIR17;MIR195;MIR20A;MIR21;MIR34A;SMAD4;MDK;NFE2L2;SFRP2;BMP7;TP53;PAX8;HAND2	16.198	9.97e-15
GOBP_NEGATIVE_REGULATION_OF_FAT_CELL_DIFFERENTIATION	YAP1;FOXO1;SIRT1;GATA2;GATA3;GPER1;IL6;MIR27B;SMAD3;ENPP1;MIR483;SOD2;TGFB1;TGFB1I1;TNF;AXIN1;WNT3A;ADIPOQ	16.198	9.97e-15
GOBP_REGULATION_OF_RAS_PROTEIN_SIGNAL_TRANSDUCTION	RASGRP1;AKAP13;CRK;CSF1;ADRA1A;EPHB2;EPO;F2R;F2RL1;FOXM1;NUP62;IGF1;APOE;ITGB1;KRAS;STMN1;MET;KITLG;NGF;NOTCH1;PDGFRB;PIK3CB;PIK3CG;RAF1;RASA1;BCL6;SRC;TGFB2;NRP1;SQSTM1	6.80405	1.06e-14
GOBP_NEURAL_CREST_CELL_DIFFERENTIATION	PDCD6;SEMA3C;EDN1;EDNRA;FN1;GDNF;HIF1A;SMAD4;KITLG;MAPK1;MAPK3;SEMA6A;SFRP1;BMP4;BMP7;SNAI2;SOX9;TWIST1;NRP1;HAND2;SEMA3E;CDC42	10.8546	1.07e-14
GOBP_POSITIVE_REGULATION_OF_GTPASE_ACTIVITY	RASGRP1;CXCL13;CCR7;CRK;DOCK11;S1PR1;ERBB2;EZH2;F2R;F2RL1;GSK3B;ITGB1;USP17L2;RHOG;NTF3;NTRK3;WNT4;RASA1;RGS4;CCL1;CCL2;CCL5;CCL11;CCL14;CCL16;CCL17;CCL19;CCL21;CCL22;CCL25;CX3CL1;SFRP1;THY1;VAV1;BCAR3;RGS6	5.4615	1.11e-14
GOBP_LIPID_STORAGE	CRP;TTC39B;SIRT1;GBA;APOE;IL1B;IL6;ITGAV;ITGB3;LEP;MIR10B;MIR34A;NFKB1;NFKBIA;ENPP1;TREM2;PPARA;PPARG;TNF;C3;CD36	11.7677	1.12e-14
GOBP_POSITIVE_REGULATION_OF_PROTEIN_LOCALIZATION_TO_NUCLEUS	YAP1;PARP1;MAPK14;AKT1;F2;GLI3;IFNG;LEP;LIF;SMAD3;NGFR;PLK1;PSEN1;PTGS2;SRC;TERT;TGFB1;HYAL2;HDAC3;CDK1;CDH1	11.7677	1.12e-14
GOBP_PROTEIN_DNA_COMPLEX_SUBUNIT_ORGANIZATION	MED16;H4-16;ESR1;ITGB3BP;MED4;H2AX;HMGB1;HMGA1;MYC;MED1;H4C15;RB1;BRD2;SMARCC1;SOX9;HNF1B;TERF1;THRA;TP53;ARID1A;H3-4;H4C9;H4C1;H4C4;H4C6;H4C12;H4C11;H4C3;H4C8;H4C2;H4C5;H4C13;H4C14;MED14;MED17	5.62648	1.16e-14
GOBP_C21_STEROID_HORMONE_METABOLIC_PROCESS	ADM;CYP11A1;CYP17A1;AKR1C1;AKR1C2;EGR1;AKR1B1;FSHB;HSD3B1;HSD3B2;LHB;WNT4;SRD5A1;TSPO;AKR1C3	25.0925	1.27e-14
GOBP_RESPONSE_TO_MINERALOCORTICOID	UCN3;PARP1;CCN2;ACE;EDN1;FOXO3;FOS;GPER1;HSD3B1;HSD3B2;IGF1R;MAOB;NTRK3;CCND1;SRC	25.0925	1.27e-14
GOBP_REGULATION_OF_MACROPHAGE_DIFFERENTIATION	CSF1;IL34;GATA2;ID2;INHA;INHBA;LIF;MIR145;PF4;PRKCA;RB1;TGFB1;ADIPOQ	39.8111	1.3e-14
GOBP_REGULATION_OF_NUCLEOTIDE_METABOLIC_PROCESS	DNM1L;MTCO2P12;PPARGC1A;PARP1;ENO1;MTOR;HIF1A;IFNG;IGF1;IL4;INSR;ARNT;NOS1;NOS2;NOS3;TREM2;PPARA;PSEN1;STAT3;TSPO;TP53;NCOR1	10.7121	1.34e-14
GOBP_REGULATION_OF_CYCLIN_DEPENDENT_PROTEIN_KINASE_ACTIVITY	CDKN1A;CDKN1B;CDKN2A;CDKN3;CEBPA;CKS1B;EGFR;AKT1;GTF2H1;MNAT1;HERC5;PLK1;PSMD10;PTEN;CCND1;ACTB;SRC;ADAM17;NR2F2;CASP3;CCNB1;CCNE1;CCNE2;CDC6	9.26427	1.35e-14
GOBP_POSITIVE_REGULATION_OF_WNT_SIGNALING_PATHWAY	CDH3;YAP1;LRRK2;COL1A1;DLX5;EGF;EGFR;FGF2;FGF9;FGFR2;DKK1;RBPJ;ILK;MIR145;SMAD3;NFKB1;SULF2;SFRP1;SFRP2;WNK1;SRC;TERT;TGFB1;TLR2;LGR5;WNT3A	8.17597	1.43e-14
GOBP_LYMPHOCYTE_HOMEOSTASIS	ADA;BCL2L11;DOCK11;AKT1;SLC40A1;HIF1A;FAS;IL2;IL2RA;IL7R;LGALS9;LYN;MIF;FOXP3;BAX;BCL2;CASP3;BCL10;CD74	14.0328	1.49e-14
GOBP_POSITIVE_REGULATION_OF_EPITHELIAL_CELL_DIFFERENTIATION	CTNNB1;FGF2;GDNF;IL13;LIF;MIR200C;MIR21;MIR34A;NOTCH1;SERPINE1;PAX2;MED1;BMP4;BMP7;SOX9;BTG1;VDR;PAX8;PROM1	14.0328	1.49e-14
GOBP_NEGATIVE_REGULATION_OF_MYELOID_LEUKOCYTE_DIFFERENTIATION	CDK6;LILRB1;CTNNB1;FBN1;GATA2;IAPP;IL4;INHA;INHBA;LTF;LYN;MYC;TNFRSF11B;SFRP1;TLR3;TLR4;ADIPOQ	17.9143	1.49e-14
GOBP_CELLULAR_DEFENSE_RESPONSE	LILRB2;CCR9;CCR5;CX3CR1;HLA-G;CXCR2;ITGB1;KIR2DL4;KIR3DL2;SH2D1A;CXCL9;RELA;CCR2;TYROBP;BECN1;BCL10;IL33	17.9143	1.49e-14
GOBP_POSITIVE_REGULATION_OF_ORGAN_GROWTH	YAP1;MAPK14;ARX;EDN1;AKT1;FGF2;FGF9;FGFR2;GATA6;GLI1;IGF1;RBPJ;IL7;MIR204;NOTCH1;WT1;CDK1	17.9143	1.49e-14
GOBP_INSULIN_SECRETION	CFTR;UCN3;CNR1;DRD2;FOXO1;GPER1;ANXA1;HIF1A;HLA-DRB1;FOXA2;IFNG;IL1B;IL1RN;IL6;LEP;SMAD2;NOS2;PSMD9;RAF1;CCL5;SFRP1;HNF1B;TNF;TRH;NR0B2;CASR;IRS2;ACVR2B;CLOCK	6.99932	1.53e-14
GOBP_ACTIVATION_OF_PROTEIN_KINASE_B_ACTIVITY	ADRA2B;FGF1;MTOR;ANG;IGF1;IL18;INSR;MIR143;MIR21;NTF3;NTRK3;SLC1A1;SRC;TXN	30.2749	1.55e-14
GOBP_MAMMARY_GLAND_DUCT_MORPHOGENESIS	PHB2;CSF1;CSF1R;ESR1;FGFR2;NR3C1;AR;AREG;PGR;WNT4;MED1;CCL11;SRC;VDR	30.2749	1.55e-14
GOBP_POSITIVE_REGULATION_OF_INNATE_IMMUNE_RESPONSE	KLRC4-KLRK1;RASGRP1;CD226;KLRK1;FPR2;CADM1;NCR3;HCK;HLA-G;HMGB1;IL12B;KIR2DL4;LYN;SH2D1A;MBL2;MMP12;PAK1;MED1;PVR;IL21;CCL5;SRC;TLR4;TYROBP;VAV1;NLRC5	8.10716	1.69e-14
GOBP_ARTERY_MORPHOGENESIS	EDN1;EDNRA;HEY1;HOXA13;HPGD;APOE;RBPJ;MIR143;MIR145;MIR205;MDK;NOTCH1;PDGFRB;DLL4;BMP4;TGFB2;TGFBR1;VEGFA;NRP1;HAND2	12.5233	1.79e-14
GOBP_POSITIVE_REGULATION_OF_CYSTEINE_TYPE_ENDOPEPTIDASE_ACTIVITY	PDCD6;BCL2L11;NOD1;CCN2;DAPK1;F2R;F3;SIRT1;GPER1;HMGB1;HSPD1;CCN1;FAS;FASLG;LGALS9;MIR27B;SMAD3;MYC;NGFR;PPARG;BAX;SLC1A1;TNF;TNFSF10;BCL10;WNT3A	8.03951	2.01e-14
GOBP_NEGATIVE_REGULATION_OF_MUSCLE_HYPERTROPHY	FOXO1;MSTN;FOXP1;MIR145;MIR21;MIR214;SMAD3;SMAD4;NOTCH1;ERRFI1;PPARA;PPARG;RGS4;TNFRSF1A;TNFRSF1B	24.016	2.05e-14
GOBP_TYPE_2_IMMUNE_RESPONSE	GATA3;TBX21;ANXA1;IL4;IL6;IL10;IL18;IDO1;ARG1;BCL6;STAT6;CCR2;IL33;CD86;CD74	24.016	2.05e-14
GOBP_REGULATION_OF_GENERATION_OF_PRECURSOR_METABOLITES_AND_ENERGY	PPARGC1A;PHB2;AKT1;MTOR;GSK3B;HIF1A;IFNG;IGF1;IL4;INSR;ARNT;MIR195;MIR210;NOS2;ENPP1;PIK3CA;PPARA;PSEN1;STAT3;TNF;TP53;IRS2;CCNB1;NCOR1;CDK1	8.50457	2.08e-14
GOBP_REGULATION_OF_BMP_SIGNALING_PATHWAY	TOB1;FST;FBN1;DKK1;GATA6;GREM1;HOXA13;CCN1;RBPJ;ILK;KDR;HES5;MIR17;MIR20A;SMAD2;SMAD4;NOTCH1;PPARG;HTRA1;SFRP1;SFRP2;BMP4;GDF3	9.67738	2.14e-14
GOBP_ESTABLISHMENT_OF_ENDOTHELIAL_BARRIER	HPSE;CLDN3;EDNRA;F2RL1;PLCB1;ICAM1;IL1B;FOXP3;ROBO4;ROCK1;CLDN5;TNF;TNFRSF1A;VEGFA;EZR;CLDN1;S1PR2	17.4167	2.14e-14
GOBP_VASCULAR_ENDOTHELIAL_CELL_PROLIFERATION	FGF2;FLT1;HMGB1;MIR126;MIR132;MIR200C;MIR21;MIR29C;MIR34A;MDK;MIR135B;PPARG;MIR503;CCL2;STAT3;ADAM17;PROK1	17.4167	2.14e-14
GOBP_RETINA_DEVELOPMENT_IN_CAMERA_TYPE_EYE	CYP1B1;ZHX2;FJX1;NECTIN3;HIF1A;IHH;NOTCH1;NTRK2;PAX2;PDGFRA;PDGFRB;SERPINF1;DLL4;MED1;PSEN1;BAX;NECTIN1;RORB;SLC1A1;BMPR1B;SOX9;STAT3;TGFB2;THY1;NRP1;PROM1;ACVR2B	7.59507	2.15e-14
GOBP_LIPID_CATABOLIC_PROCESS	CDK4;SMPDL3A;CNR1;CYP1A2;CYP1B1;CYP3A4;CYP19A1;CYP26A1;DECR1;AKT1;PLCB1;GBA;HPGD;APOA2;APOE;IL1B;LEP;LIPC;LIPE;CYP4F3;STS;PIK3CG;PLA2G2A;PLCB4;PPARA;PPT1;RARRES2;SPP1;SRD5A1;SRD5A2;SULT1E1;SULT2A1;THRA;TNF;TWIST1;AKR1C3;IRS2;ADIPOQ;LIPG	4.89202	2.29e-14
GOBP_CARDIAC_CELL_DEVELOPMENT	PDLIM5;AKAP13;ADRA1A;AGT;EDN1;MTOR;FOXP1;PDCD4;IGF1;INHBA;MIR195;MIR21;SMAD4;NOTCH1;PDGFRA;PDGFRB;PPARA;RGS4;BMP4;VEGFA;CDK1	11.2589	2.33e-14
GOBP_CELLULAR_RESPONSE_TO_TOXIC_SUBSTANCE	ABCB6;ALB;GPX3;GPX4;GSTM1;GSTM2;GSTP1;GSTT1;HP;APOE;GSTK1;MIR21;MPO;NFE2L2;NOS3;PTGS2;BMP7;SOD1;SOD2;TNF;TXN;CAT;CD36;PTGES	8.98297	2.42e-14
GOBP_REGULATION_OF_PROTEIN_LOCALIZATION_TO_NUCLEUS	YAP1;PARP1;MAPK14;AKT1;F2;GLI3;ANGPT1;GSK3B;IFNG;LEP;LIF;SMAD3;NGFR;PLK1;PSEN1;PTGS2;BMP4;SRC;TERT;TGFB1;HYAL2;HDAC3;CD36;CDK1;CDH1	8.42712	2.49e-14
GOBP_EXOCYTOSIS	RASGRP1;ABCC4;CFTR;PRRT2;LRRK2;CCR1;CNR1;ADRA1A;DRD2;F2RL1;FCGR3A;FGA;GATA2;ANK1;GSK3B;ANXA1;ANXA2;HCK;IFNG;IL4;IL13;ITGAM;LGALS9;LYN;NOTCH1;PAK1;PIK3CD;PIK3CG;PRKCB;VPS11;PSEN1;CCL5;SDC1;SDC4;BRAF;SYP;SYT1;BTK;CCR2;WNT7A;ZP3	4.63391	2.63e-14
GOBP_CARBOXYLIC_ACID_TRANSPORT	ABCC4;ACE;AKR1C1;DRD2;AGT;EDN1;SLC7A8;GJA1;ANXA1;IL1A;IL1B;AQP9;ITGB1;ARG1;LEP;LHCGR;MIR33A;MIF;NOS2;NTRK2;PLA2G2A;PSEN1;PTGS2;RGS4;SLC1A1;SSTR4;TNF;TRH;TRPV1;SLC38A1;NR0B2;CASR;SLC16A6;SFXN1;CD36;PTGES	5.28873	2.66e-14
GOBP_DNA_REPLICATION_DEPENDENT_CHROMATIN_ASSEMBLY	H4-16;H4C15;H4C9;H4C1;H4C4;H4C6;H4C12;H4C11;H4C3;H4C8;H4C2;H4C5;H4C13;H4C14	28.6105	2.68e-14
GOBP_POSITIVE_REGULATION_OF_MONOOXYGENASE_ACTIVITY	CDH3;NOD1;AGTR2;AKT1;GDNF;HIF1A;IFNG;APOE;IL1B;PIK3CB;S100A1;TERT;TNF;VDR	28.6105	2.68e-14
GOBP_CONNECTIVE_TISSUE_REPLACEMENT	F2R;HIF1A;IL1A;MIR17;MIR195;MIR214;MIR34A;PPARG;ROCK1;TGFB1;TIMP1;RUNX1	48.9513	2.99e-14
GOBP_REGULATION_OF_LIPID_STORAGE	CRP;TTC39B;SIRT1;IL6;ITGAV;ITGB3;LEP;MIR10B;MIR34A;NFKB1;NFKBIA;TREM2;PPARA;PPARG;TNF;C3;CD36	16.9461	3.05e-14
GOBP_NEGATIVE_REGULATION_OF_EPITHELIAL_CELL_DIFFERENTIATION	YAP1;FST;CTNNB1;EZH2;IFNG;IL1A;IL13;KRAS;HES5;MMP9;NOTCH1;NOTCH4;CCND1;SOX9;ZEB1;VEGFA;GDF3	16.9461	3.05e-14
GOBP_NEGATIVE_REGULATION_OF_COAGULATION	CPB2;EDN1;F2;FGA;ANXA2;APOE;KNG1;NOS3;SERPINE1;SERPINB2;PDGFA;PDGFRA;PLAU;PLG;THBS1;SERPING1;VTN	16.9461	3.05e-14
GOBP_ESTROGEN_METABOLIC_PROCESS	CYP1A1;CYP1A2;CYP1B1;CYP3A4;CYP19A1;HSD3B1;HSD17B1;HSD17B2;HSD17B7;PDGFRA;UGT2B28;UGT1A1;SULT1E1;SULT1A1;DHRS11	23.0136	3.25e-14
GOBP_AMYLOID_BETA_CLEARANCE	HDAC1;IFNG;IFNGR1;APOE;IGF1R;IL4;INSR;ITGAM;MIR34A;MME;TREM2;ROCK1;TNF;C3;CD36	23.0136	3.25e-14
GOBP_POSITIVE_REGULATION_OF_FAT_CELL_DIFFERENTIATION	CARM1;CEBPA;CREB1;MAPK14;AKT1;ID2;MIR17;MIR21;PPARG;PTGS2;RARRES2;SFRP1;SFRP2;BMP7;SNAI2;SULT1E1;XBP1;ZFP36;GDF3	13.2386	3.52e-14
GOBP_T_CELL_MIGRATION	CXCL13;CD200R1;CRK;S1PR1;AIF1;ICAM1;CXCL10;ITGB3;CD200;PIK3CD;PIK3CG;CXCL16;CCL2;CCL5;CCL21;CXCL12;WNK1;ADAM17;CCR2	13.2386	3.52e-14
GOBP_REGULATION_OF_SPROUTING_ANGIOGENESIS	FGF1;FGF2;IL10;ITGA5;JAK1;MIR126;MIR17;MIR20A;MIR30C1;MIR31;MIR34A;MIR375;PIK3CB;SEMA6A;S100A1;THBS1;VEGFA;CREB3L1	14.7581	3.6e-14
GOBP_POSITIVE_REGULATION_OF_MUSCLE_CELL_DIFFERENTIATION	MAPK14;CTH;EDN1;SIRT1;MTOR;GPER1;IGF1;LAMB1;MIR145;MIR204;MIR21;MIR22;MIR34A;MDM2;MMP14;BCL2;BMP4;SOD2;TGFB1;WNT3A	11.921	3.88e-14
GOBP_SMAD_PROTEIN_SIGNAL_TRANSDUCTION	TOB1;PARP1;FOS;MSTN;INHA;INHBA;JUN;SMAD2;SMAD3;SMAD4;PPARG;BMP4;BMP7;TGFB1;TGFB2;TGFB3;LEFTY2;TGFBR1;VIM;GDF3	11.921	3.88e-14
GOBP_SECONDARY_ALCOHOL_METABOLIC_PROCESS	CEBPA;CETP;CFTR;CYP2R1;CYP1A2;CYP3A4;TTC39B;CYP11A1;FGF1;GBA;APOA2;APOE;IL4;LBR;LEP;LEPR;LIPC;LIPE;MIR30C1;HSD17B7;PON1;SOD1;STAR;SULT2A1;NR0B2;CAT	7.77985	3.92e-14
GOBP_REGULATION_OF_PROTEIN_LOCALIZATION_TO_PLASMA_MEMBRANE	CIB1;AGR2;CSK;EGFR;EPHA3;EPHB2;AKT1;GPER1;IFNG;AR;ITGB1;RHOG;LGALS3;MMP14;TREM2;BCL2L1;ACTB;TGFB1;TNF;EZR;SQSTM1;WNT3A	10.0495	4.04e-14
GOBP_TOLL_LIKE_RECEPTOR_SIGNALING_PATHWAY	FCRL3;ESR1;F2RL1;PTPN22;HMGB1;BIRC2;BIRC3;HSPD1;TICAM2;LGALS9;LTF;LYN;MIR17;NFKBIA;NINJ1;TREM2;BTK;TLR2;TLR3;TLR4;TNF;BCL10;CD14;CD36	8.71827	4.24e-14
GOBP_NEGATIVE_REGULATION_OF_PRODUCTION_OF_MOLECULAR_MEDIATOR_OF_IMMUNE_RESPONSE	LILRB1;FCRL3;ANGPT1;TBX21;APOA2;IL10;ARG1;FOXP3;AXL;BCL6;TGFB1;TGFB2;TGFB3;TNF;TWIST1;IL33	19.0202	4.3e-14
GOBP_RHYTHMIC_BEHAVIOR	CRH;PARP1;CSF2;DRD2;EGR1;MTOR;GHRH;GHRHR;ID2;KCNQ1;PTEN;SRD5A1;TP53;MTA1;NCOR1;NR1D2	19.0202	4.3e-14
GOBP_NEGATIVE_REGULATION_OF_LIPID_TRANSPORT	EGF;AKT1;APOA2;ITGAV;ITGB3;MIR148A;MIR17;MIR27B;MIR30C1;MIR33A;MIR34A;NFKB1;MIR33B;THBS1;TSPO;IRS2	19.0202	4.3e-14
GOBP_POSITIVE_REGULATION_OF_NUCLEOTIDE_METABOLIC_PROCESS	MTCO2P12;PPARGC1A;ENO1;MTOR;HIF1A;IFNG;IGF1;IL4;INSR;ARNT;NOS1;NOS2;NOS3;TREM2;PPARA;PSEN1	19.0202	4.3e-14
GOBP_POSITIVE_REGULATION_OF_NEURAL_PRECURSOR_CELL_PROLIFERATION	CTNNB1;CX3CR1;DRD2;EGF;FGF2;GLI1;GLI3;HIF1A;ITGB1;LYN;MDK;NOTCH1;DLL4;CX3CL1;VEGFA;VEGFC;WNT3A	16.5002	4.31e-14
GOBP_POSITIVE_REGULATION_OF_STEM_CELL_PROLIFERATION	YAP1;OSR2;CTNNB1;FGF2;FGF9;GJA1;KDR;EPCAM;KITLG;PTPRC;SOX9;TERT;VEGFC;NANOG;HMGA2;IRS2;CCNE1	16.5002	4.31e-14
GOBP_REGULATION_OF_CELLULAR_SENESCENCE	MIR543;CDK6;SIRT1;HLA-G;KIR2DL4;MIR17;MIR22;MIR34A;MIF;YBX1;B2M;PTEN;BCL6;TERT;TP53;TWIST1;HMGA2	16.5002	4.31e-14
GOBP_EMBRYONIC_DIGESTIVE_TRACT_DEVELOPMENT	ADA;FGF9;FGFR2;GLI3;ID2;IHH;CXCL8;PDGFRA;RARB;RARRES2;HNF1B;TCF21;TGFB2;TNF	27.1315	4.54e-14
GOBP_DENDRITIC_CELL_CHEMOTAXIS	CCR1;CCR5;CCR7;HMGB1;CXCR1;CXCR2;LGALS9;PIK3CG;CCL5;CCL19;CCL21;CCR2;CXCR4	34.134	4.77e-14
GOBP_PATTERN_RECOGNITION_RECEPTOR_SIGNALING_PATHWAY	NOD1;PHB2;FCRL3;ESR1;F2RL1;PTPN22;HMGB1;BIRC2;BIRC3;HSPD1;TICAM2;USP17L2;LGALS9;LTF;LYN;MIR17;MBL2;NFKBIA;NINJ1;TREM2;RELA;BTK;TLR2;TLR3;TLR4;TNF;BCL10;CD14;CD36	6.65288	4.78e-14
GOBP_DENDRITIC_CELL_APOPTOTIC_PROCESS	LILRB1;CCR7;LGALS9;LYN;AXL;BCL2;BCL2L1;CCL19;CCL21;CXCL12	121.95	4.81e-14
GOBP_REGULATION_OF_APOPTOTIC_PROCESS_INVOLVED_IN_DEVELOPMENT	NOTCH1;PAX2;BAX;BMP7;HNF1B;TGFB2;TNFRSF1A;TNFRSF1B;VDR;PAX8	121.95	4.81e-14
GOBP_REGULATION_OF_B_CELL_MEDIATED_IMMUNITY	CD226;CD55;TBX21;IL2;IL4;IL10;LTA;MLH1;MSH2;FOXP3;TREM2;PTPRC;BCL6;STAT6;BTK;TGFB1;TNF;C3	14.438	4.89e-14
GOBP_REGULATION_OF_NEUROBLAST_PROLIFERATION	LRRK2;CTNNB1;CX3CR1;DRD2;FGF2;KIFAP3;GLI3;HIF1A;ITGB1;NOTCH1;PTN;CX3CL1;TP53;VEGFA;VEGFC	22.0928	5.07e-14
GOBP_INFLAMMATORY_RESPONSE_TO_WOUNDING	F2R;HIF1A;IL1A;MIR17;MIR21;MDK;PPARG;TGFB1;TIMP1;TLR4;CCR2	67.1548	5.13e-14
GOBP_EMBRYONIC_DIGIT_MORPHOGENESIS	BCL2L11;OSR2;CTNNB1;INTU;GLI3;HDAC1;HDAC2;HOXA11;IHH;SMAD4;NOTCH1;BAX;SFRP2;BMP4;TWIST1;WNT7A;HAND2	16.0693	6.03e-14
GOBP_EPITHELIAL_CELL_DIFFERENTIATION_INVOLVED_IN_KIDNEY_DEVELOPMENT	YAP1;CTNNB1;EDNRA;GATA3;GREM1;GDNF;LIF;MMP9;NOTCH1;PAX2;ACTA2;BMP4;WT1;PAX8;PROM1;ADIPOQ	18.4258	6.29e-14
GOBP_NEGATIVE_REGULATION_OF_CANONICAL_WNT_SIGNALING_PATHWAY	CTHRC1;MAPK14;CTNNB1;EGR1;DKK1;FOXO1;FOXO3;GREM1;RBMS3;GLI1;GLI3;GSK3B;HDAC1;APOE;IGFBP1;IGFBP6;MIR29C;MDK;NOTCH1;SFRP1;SFRP2;SNAI2;SOX2;SOX9;AXIN1	7.99062	7.05e-14
GOBP_NEGATIVE_REGULATION_OF_TRANSMEMBRANE_TRANSPORT	CRHR1;ACE;DRD2;EPHB2;EPO;AKT1;NEDD4L;REM1;GSTM2;IL1B;LEP;MIR143;MIR200C;MIR34A;MMP9;NOS1;ENPP1;PRKCB;MIR451A;BCL2;RGS4;THBS1;TNF;TWIST1;IRS2;PEA15	7.53649	7.48e-14
GOBP_DENDRITIC_CELL_MIGRATION	CCR1;CCR5;CCR7;HMGB1;CXCR1;CXCR2;LGALS9;PIK3CG;CCL5;CCL19;CCL21;CCR2;CXCR4;CDC42	25.7482	7.54e-14
GOBP_REGULATION_OF_SUPEROXIDE_METABOLIC_PROCESS	CRP;AGT;F2RL1;FPR2;GSTP1;ITGAM;MIR21;MIR27B;NFE2L2;BMP7;SOD1;TGFB1;TYROBP;CD36	25.7482	7.54e-14
GOBP_DIGESTIVE_SYSTEM_PROCESS	CHRM3;AKR1C1;APOA2;AQP1;IL17A;AQP5;KCNQ1;LEP;MDK;MUC2;MUC4;OXTR;WNK1;SOX9;TACR1;TFF3;TLR4;UCN;VDR;EZR;TRPV1;CD36	9.68991	7.57e-14
GOBP_REGULATION_OF_ORGANIC_ACID_TRANSPORT	AGT;EDN1;AKT1;IL1A;IL1B;ITGB1;ARG1;LEP;MIF;PPARA;PSEN1;RGS4;SSTR4;THBS1;TNF;TRH;SLC38A1;IRS2;PTGES	12.5244	7.95e-14
GOBP_REGULATION_OF_MYOBLAST_DIFFERENTIATION	SRA1;MAPK14;PLCB1;MSTN;IGFBP3;IL18;CXCL10;CXCL9;NOTCH1;ACTB;CCL17;BMP4;SMARCC1;SOX9;BTG1;TGFB1;TNF;ARID1A;GDF3	12.5244	7.95e-14
GOBP_ORGANOPHOSPHATE_METABOLIC_PROCESS	ADA;DNM1L;MTCO2P12;CETP;PPARGC1A;SMPDL3A;PHB2;LRRK2;PARP1;CSF1R;ENO1;FGF2;PLCB1;FMO2;ALOX15;MTOR;GATA6;GPER1;GPX4;HIF1A;HK1;ACACA;HPRT1;APOA2;IFNG;IGF1;IL4;IMPA2;IDO1;INSR;LHCGR;LIPC;ARNT;MIR30C1;MAS1;MECP2;ATM;NME1;NOS1;NOS2;NOS3;NT5E;OGG1;P2RY6;PDGFA;PDGFRB;ENPP1;ENPP3;PIK3CA;PIK3CB;PIK3CD;PIK3CG;PLA2G2A;TREM2;PON1;PPARA;PPT1;PSEN1;PTEN;STAT3;SULT1E1;SULT1A1;SULT2A1;TGFB1;TSPO;TP53;CARD11;BECN1…	2.88817	7.98e-14
GOBP_FOCAL_ADHESION_ASSEMBLY	EPHA3;POLDIP2;GREM1;ITGA2;KDR;SMAD3;MMP14;WNT4;PTEN;BCL2;ROCK1;SDC4;SFRP1;SRC;TEK;THBS1;THY1;VEGFA;ACTN1;NRP1	11.3726	8.13e-14
GOBP_NEGATIVE_REGULATION_OF_NEURON_PROJECTION_DEVELOPMENT	CARM1;SEMA3C;CIB1;LRRK2;CRMP1;EPHB2;FKBP4;DKK1;MYLIP;HDAC2;APOE;MIR210;MAP2;PSEN1;B2M;PTEN;SEMA6A;SPP1;THY1;VIM;NRP1;WNT3A;SLIT2;SEMA3E;CDH1	7.92225	8.34e-14
GOBP_XENOBIOTIC_METABOLIC_PROCESS	NAT2;ABCC4;CYP2R1;CYP1A1;CYP1A2;CYP1B1;CYP2B6;CYP2C19;CYP3A4;CYP26A1;AKR1C1;AHR;FMO2;GSTM1;GSTM2;GSTP1;NOS1;UGT2B28;UGT1A1;AHRR;SULT1A1;SULT2A1;NR1I2	8.96409	8.55e-14
GOBP_REGULATION_OF_MACROPHAGE_CHEMOTAXIS	CSF1;CSF1R;IL34;CYP19A1;MSTN;MDK;MIF;MAPK1;MAPK3;RARRES2;CCL5;THBS1;C5	31.8689	8.69e-14
GOBP_REGULATION_OF_ANTIGEN_RECEPTOR_MEDIATED_SIGNALING_PATHWAY	ADA;CD226;FCRL3;CCR7;PTPN22;FOXP1;LGALS3;LYN;SH2D1A;MIR34A;PRKCB;PTPRC;RELA;THY1;EZR;CARD11;BCL10;CD19	13.837	8.84e-14
GOBP_POSITIVE_REGULATION_OF_MUSCLE_CONTRACTION	ADA;CHRM3;ADRA1A;CCN2;ADRA2B;EDN1;ENO1;F2R;GPER1;ITGA2;KCNQ1;MIR21;OXTR;PTGS2;TACR1;UCN	17.8676	9.1e-14
GOBP_REGULATION_OF_FATTY_ACID_METABOLIC_PROCESS	PPARGC1A;CNR1;AKT1;FMO2;SIRT1;ANXA1;IL1B;MIR132;MIR204;MIR30C1;MIR33A;PPARA;PPARG;PTGS2;SOX9;BRCA1;TWIST1;IRS2;ADIPOQ;NCOR1;CD74	10.3534	9.23e-14
GOBP_REGULATION_OF_INTRACELLULAR_TRANSPORT	CIB1;KHDRBS1;LRRK2;MAPK14;ERBB2;GLI3;ANGPT1;GSK3B;ANXA2;IFI27;IFNG;IL1B;ITGAM;USP17L2;LEP;MIR17;MIR27B;SMAD3;MAP2;VPS11;MAPK1;MAPK3;MAPK8;MAP2K1;PSEN1;PTGS2;SLC1A1;BMP4;SRC;TGFB1;TXN;EZR;HYAL2;HDAC3;ADIPOQ;CD36;CDK1;CDH1	4.77823	9.31e-14
GOBP_MONOCARBOXYLIC_ACID_TRANSPORT	ABCC4;ACE;AKR1C1;DRD2;EDN1;ANXA1;IL1A;IL1B;AQP9;LEP;LHCGR;MIR33A;MIF;NOS2;PLA2G2A;PTGS2;SSTR4;TNF;NR0B2;CASR;SLC16A6;CD36;PTGES	8.87054	1.03e-13
GOBP_POSITIVE_REGULATION_OF_CANONICAL_WNT_SIGNALING_PATHWAY	CDH3;YAP1;LRRK2;COL1A1;DLX5;EGF;EGFR;FGF2;FGF9;FGFR2;RBPJ;ILK;MIR145;SMAD3;NFKB1;SFRP1;SFRP2;WNK1;SRC;TGFB1;LGR5;WNT3A	9.4652	1.14e-13
GOBP_NEGATIVE_REGULATION_OF_PROTEIN_BINDING	CDKN1A;LRRK2;CRMP1;ACE;AKT1;DKK1;GSK3B;IFIT1;IL10;MIR148A;MIR27B;MAP2;PPARA;MAPK3;MAPK8;B2M;BAX;ACTB;ROCK1;SLPI;ADIPOQ	10.2194	1.15e-13
GOBP_NEUROBLAST_PROLIFERATION	LRRK2;CTNNB1;CX3CR1;DRD2;FGF2;FGFR2;KIFAP3;GLI3;HIF1A;ITGB1;NOTCH1;PTN;CX3CL1;TP53;VEGFA;VEGFC;WNT3A;ARTN	13.5547	1.18e-13
GOBP_NEGATIVE_REGULATION_OF_CYTOKINE_PRODUCTION_INVOLVED_IN_IMMUNE_RESPONSE	LILRB1;ANGPT1;TBX21;APOA2;IL10;ARG1;FOXP3;AXL;BCL6;TGFB1;TGFB2;TGFB3;TNF;TWIST1	24.5408	1.22e-13
GOBP_POSITIVE_REGULATION_OF_MUSCLE_CELL_APOPTOTIC_PROCESS	CDKN2A;AGT;GATA6;PDCD4;IFNG;CXCR2;IL12B;MIR17;MIR195;MIR34A;SMAD4;PPARG;SOD2;TP53	24.5408	1.22e-13
GOBP_POSITIVE_REGULATION_OF_CELL_MIGRATION_INVOLVED_IN_SPROUTING_ANGIOGENESIS	CIB1;FGF2;GATA2;ANXA1;KDR;MIR10B;MIR126;MIR132;MIR27B;MIR31;PTGS2;VEGFA;NRP1;HDAC9	24.5408	1.22e-13
GOBP_LOCOMOTORY_BEHAVIOR	CLCN3;LRRK2;CRH;DPP4;DRD2;EGR1;MTOR;GDNF;HPGDS;FOXA2;HPRT1;ID2;APOE;IDO1;MECP2;NTF4;PPT1;ANKH;PTEN;CXCL12;SELENOP;SLC1A1;SNCG;SOD1;SOD2;TRH;UCHL1;MTA1;NCOR1	6.37629	1.23e-13
GOBP_INTRACELLULAR_TRANSPORT	PDCD6;BCL2L11;RASGRP1;CDKN1A;CIB1;TXNIP;KHDRBS1;AKAP13;PHB2;LRRK2;MAPK14;CSE1L;AGT;ELAVL1;ERBB2;AKT1;FGF9;KIFAP3;NUP210;NUP62;INTU;GLI3;ANGPT1;ANK1;CCDC22;GSK3B;ANXA2;HIF1A;HSPA4;HSPD1;IFI27;IFNG;APOE;TICAM2;IL1B;ITGAM;USP17L2;LEP;LHCGR;LMNB1;MIR17;MIR27B;MIR29C;SMAD3;MAP2;MMP12;NFKBIA;NGFR;NOTCH1;TMED7;VTA1;MED1;VPS53;SYBU;VPS11;MAPK1;MAPK3;MAPK8;MAP2K1;PSEN1;PTGS2;BAX;BCL2;BCL2L1;SRL;ATG3;SLC1A…	2.46536	1.24e-13
GOBP_REGULATION_OF_CIRCADIAN_RHYTHM	PPARGC1A;CRH;PARP1;CSF2;DRD2;NR2F6;EZH2;MTOR;GHRH;GHRHR;GSK3B;ID2;PPARA;PPARG;MAPK8;RORB;KLF10;TP53;HDAC3;MTA1;CLOCK;CDK1;NR1D2	8.77893	1.25e-13
GOBP_ENDOCARDIAL_CUSHION_DEVELOPMENT	HEY1;RBPJ;SMAD4;MDM2;NOS3;NOTCH1;BMP4;BMP7;SNAI2;SNAI1;SOX9;TGFB1;TGFB2;TGFB3;TGFBR1;TWIST1	17.3421	1.31e-13
GOBP_POSITIVE_REGULATION_OF_LIPID_BIOSYNTHETIC_PROCESS	ADM;CREB1;AKT1;FGF1;MTOR;FSHB;ANXA1;HSD17B13;IFNG;APOE;IGF1R;CCN1;IL1A;IL1B;WNT4;PPARA;PTGS2;STAR;TNF;CD74	11.0278	1.31e-13
GOBP_NEGATIVE_REGULATION_OF_POST_TRANSCRIPTIONAL_GENE_SILENCING	ADAR;ELAVL1;ESR1;IL6;POU5F1;PPARG;STAT3;TERT;TGFB1;TNF;TP53;NCOR1	40.0559	1.31e-13
GOBP_FEEDING_BEHAVIOR	CNR1;ACE;AGRP;DRD2;AGT;FOS;IAPP;LEP;LEPR;NTRK2;OPRM1;OXTR;RETN;REN;STAT3;BRS3;TACR1;TRH;UCHL1;UCN;CALCA;HAND2	9.3562	1.39e-13
GOBP_POSITIVE_REGULATION_OF_COLD_INDUCED_THERMOGENESIS	PPARGC1A;DECR1;DIO2;GATM;GJA1;IGF1R;IL4;IL13;IL18;LEP;LEPR;OXTR;PRLR;STAT6;THRA;CCR2;VEGFA;CXCR4;HDAC3;ADIPOQ;CD36	10.0826	1.43e-13
GOBP_REGULATION_OF_HEART_CONTRACTION	ADA;ABCC9;ADM;ADRA1A;CCN2;DRD2;AGT;HBEGF;AGTR2;EDN1;EDNRA;GJA1;GSTM2;IL2;KCNQ1;MIR200C;MDM2;NOS1;NOS3;PIK3CG;RGS4;S100A1;SLC1A1;STC1;TGFB2;THRA;TNF;UCN;TRPV1;CALCA	6.06168	1.52e-13
GOBP_REGULATION_OF_PROTEIN_LOCALIZATION_TO_MEMBRANE	CIB1;AGR2;CSK;EGFR;EPHA3;EPHB2;ERBB2;AKT1;GPER1;IFNG;AR;ITGAM;ITGB1;USP17L2;RHOG;LGALS3;MMP14;TREM2;MAPK8;BCL2L1;ACTB;SLC1A1;TGFB1;TNF;EZR;SQSTM1;WNT3A	6.91056	1.55e-13
GOBP_RECEPTOR_INTERNALIZATION	LILRB1;ADM;DRD2;EGF;DKK1;GREM1;GH1;ANGPT1;ANXA2;CXCL8;CXCR1;CXCR2;INSR;ITGB1;ITGB3;NTF3;ACKR3;SAG;SELE;VEGFA;EZR;WNT3A;CD36	8.60128	1.8e-13
GOBP_POSITIVE_REGULATION_OF_CELL_CYCLE_PHASE_TRANSITION	CDK4;PHB2;CYP1A1;EGFR;AIF1;AKT1;EZH2;PLCB1;GLI1;TMOD3;ANXA1;APEX1;MIR214;MDM2;MECP2;RB1;CCND1;ADAM17;TERT;TFDP1;CCNB1;CDK1;CDC6	8.60128	1.8e-13
GOBP_MYELOID_LEUKOCYTE_CYTOKINE_PRODUCTION	NOD1;LILRB1;SIRT1;HLA-G;MIF;AXL;BCL6;TGFB1;TGFB2;TGFB3;TLR3;TLR4;TWIST1;BCL10;CD36;CD74	16.8467	1.85e-13
GOBP_NEGATIVE_REGULATION_OF_STRESS_ACTIVATED_PROTEIN_KINASE_SIGNALING_CASCADE	SIRPA;DUSP1;F2RL1;FOXM1;FOXO1;PTPN22;PDCD4;GSTP1;MIR20A;MYC;TREM2;SFRP1;SFRP2;EZR;HDAC3;NCOR1	16.8467	1.85e-13
GOBP_POSITIVE_REGULATION_OF_LIPID_KINASE_ACTIVITY	CCR7;F2;FGF2;FLT1;LYN;PDGFRA;PDGFRB;CCL19;CCL21;SRC;TEK;TGFB1;CD19;CDC42	23.4124	1.96e-13
GOBP_REGULATION_OF_MUSCLE_CONTRACTION	ADA;MYL9;CHRM3;ADRA1A;CCN2;ADRA2B;EDN1;ENO1;F2R;GPER1;GSTM2;NR4A1;ITGA2;KCNQ1;MIR143;MIR145;MIR200C;MIR21;NOS1;OXTR;PIK3CG;PTGS2;SOD1;STC1;TACR1;UCN;CALCA	6.81641	2.07e-13
GOBP_POSITIVE_REGULATION_OF_OXIDOREDUCTASE_ACTIVITY	CDH3;NOD1;AGT;AGTR1;AGTR2;EDN1;AKT1;GDNF;HIF1A;IFNG;APOE;IL1B;PIK3CB;S100A1;TERT;TNF;VDR	14.575	2.16e-13
GOBP_CELLULAR_OXIDANT_DETOXIFICATION	ALB;GPX3;GPX4;GSTM2;GSTP1;GSTT1;HP;APOE;GSTK1;MIR21;MPO;NFE2L2;NOS3;PTGS2;BMP7;SOD1;SOD2;TXN;CAT;CD36;PTGES	9.8284	2.18e-13
GOBP_POSITIVE_REGULATION_OF_MITOTIC_CELL_CYCLE_PHASE_TRANSITION	CDK4;PHB2;CYP1A1;EGFR;AIF1;AKT1;PLCB1;TMOD3;ANXA1;APEX1;MIR214;MDM2;MECP2;RB1;CCND1;ADAM17;TERT;TFDP1;CCNB1;CDK1;CDC6	9.8284	2.18e-13
GOBP_INSULIN_RECEPTOR_SIGNALING_PATHWAY	CDK4;AGT;AHSG;AKT1;FOXO1;SIRT1;MSTN;GSK3B;IGF1R;IGFBP1;IL1B;INSR;LEP;MIR195;ENPP1;PIK3CA;PRKCB;RARRES2;SHC1;SMARCC1;SRC;BCAR3;IRS2	8.4307	2.59e-13
GOBP_POSITIVE_REGULATION_OF_STRESS_FIBER_ASSEMBLY	CCN2;MTOR;RHOC;LIMK1;SMAD3;PAK1;WNT4;SDC4;SFRP1;BRAF;TACR1;TGFB3;TGFBR1;NRP1;CD47;CDC42	16.3788	2.61e-13
GOBP_T_CELL_LINEAGE_COMMITMENT	MTOR;TBX21;IL6;IL7;IL12B;IL12RB1;FOXP3;IL23A;BCL2;BRAF;STAT3;STAT6;TP53	28.109	2.65e-13
GOBP_REGULATION_OF_T_HELPER_1_TYPE_IMMUNE_RESPONSE	IL27;TBX21;ANXA1;IL1B;IL1R1;IL12B;IL12RB1;IL18;IL23A;CCL19;CCR2;IL18R1;IL33	28.109	2.65e-13
GOBP_POSITIVE_REGULATION_OF_COAGULATION	HPSE;CPB2;F2;F2R;F3;NFE2L2;SERPINE1;PLAU;PLG;PSEN1;THBS1;VTN;CD36	28.109	2.65e-13
GOBP_NEGATIVE_REGULATION_OF_INTRINSIC_APOPTOTIC_SIGNALING_PATHWAY_IN_RESPONSE_TO_DNA_DAMAGE	SIRT1;MIF;MUC1;ACKR3;BCL2;BCL2L1;CXCL12;SFRP2;SNAI2;SNAI1;TPT1;CD44;CD74	28.109	2.65e-13
GOBP_FATTY_ACID_TRANSPORT	CRABP2;ACE;DRD2;EDN1;AKT1;ANXA1;APOE;IL1A;IL1B;LHCGR;MIF;PLA2G2A;PPARA;PPARG;RBP1;SLC2A1;SSTR4;THBS1;IRS2;CD36;PTGES	9.70444	2.68e-13
GOBP_POSITIVE_REGULATION_OF_HISTONE_MODIFICATION	PPARGC1A;LRRK2;CTNNB1;DNMT1;DNMT3B;ERCC6;SIRT1;GATA3;LIF;SMAD4;MECP2;MUC1;MYB;NOS1;FOXP3;BCL6;SNAI2;BRCA1;TP53;VEGFA;TET1	9.70444	2.68e-13
GOBP_CELLULAR_CARBOHYDRATE_METABOLIC_PROCESS	PPARGC1A;AKT1;FOXO1;SIRT1;MTOR;GPER1;NR3C1;GSK3B;HAS1;HK1;FOXA2;IGF1;IGFBP3;IMPA2;INSR;LEP;LEPR;LHCGR;MIR195;MIR210;MAS1;MECP2;MST1;P2RY6;ENPP1;PPARA;PTEN;SRC;BRAF;STAT3;TFF3;TP53;IRS2;ADIPOQ;NCOR1	4.97882	2.86e-13
GOBP_SPECIFICATION_OF_ANIMAL_ORGAN_IDENTITY	CTNNB1;FGF1;FGF2;FGFR2;DKK1;GDNF;GLI3;HOXA11;RBPJ;AR;PAX2;BMP4;PAX8;WNT3A	22.3943	3.07e-13
GOBP_CELLULAR_RESPONSE_TO_CADMIUM_ION	ABCB6;CHUK;CYP1A2;EGFR;AKT1;FOS;JUN;MMP9;OGG1;MAPK1;MAPK3;MAPK8;SOD1;AKR1C3	22.3943	3.07e-13
GOBP_REGULATION_OF_PROTEIN_LOCALIZATION_TO_CELL_PERIPHERY	CIB1;AGR2;CSK;EGFR;EPHA3;EPHB2;AKT1;GPER1;IFNG;AR;ITGB1;RHOG;LGALS3;MMP14;PLK1;TREM2;BCL2L1;ACTB;TGFB1;TNF;EZR;SQSTM1;WNT3A	8.34793	3.09e-13
GOBP_REGULATION_OF_DNA_BIOSYNTHETIC_PROCESS	CDKN1A;CTNNB1;CYP1B1;FGF2;GREM1;ANKRD1;HGF;MYC;ATM;PCNA;PDGFA;PDGFRB;MAPK1;MAPK3;MAP2K7;SMOC2;SRC;TERF1;TFDP1;TNF;TP53;STN1;ADIPOQ	8.34793	3.09e-13
GOBP_REGULATION_OF_HISTONE_MODIFICATION	CTCF;PPARGC1A;LRRK2;CTNNB1;DNMT1;DNMT3B;ERCC6;SIRT1;GATA2;GATA3;USP17L2;LIF;SMAD4;MECP2;MUC1;MYB;NOS1;FOXP3;MAPK8;BCL6;SNAI2;BRCA1;TP53;TWIST1;UCN;VEGFA;TET1	6.63525	3.63e-13
GOBP_NEGATIVE_REGULATION_OF_MUSCLE_CELL_APOPTOTIC_PROCESS	DNMT1;EDN1;KIFAP3;IGF1;IGF1R;MIR145;MIR17;MIR20A;MIR21;MIR210;MDK;NFE2L2;SFRP2;BMP7;PAX8;HAND2	15.9284	3.65e-13
GOBP_POSITIVE_REGULATION_OF_CD4_POSITIVE_ALPHA_BETA_T_CELL_ACTIVATION	CD55;ANXA1;HLA-DRB1;IFNG;IL12B;IL12RB1;IL18;LGALS9;MIR21;MYB;FOXP3;IL23A;CCL19;CARD11;CD86	18.4106	3.84e-13
GOBP_POSITIVE_REGULATION_OF_ACTIN_FILAMENT_BUNDLE_ASSEMBLY	CCN2;MTOR;RHOC;LIMK1;SMAD3;PAK1;WNT4;CX3CL1;SDC4;SFRP1;BRAF;TACR1;TGFB3;TGFBR1;NRP1;CD47;CDC42	13.9281	3.91e-13
GOBP_REGULATION_OF_SYNAPTIC_PLASTICITY	LILRB2;PRRT2;CRHR2;CX3CR1;ACE;DRD2;AGT;EPHB2;GSK3B;APOE;KRAS;MECP2;MME;MIR342;NTRK2;P2RX3;MAPK1;PSEN1;PTEN;PTGS2;PTN;S100B;CX3CL1;SLC1A1;BRAF;SYP;TYROBP;SLC38A1;SQSTM1	6.05263	3.93e-13
GOBP_OOGENESIS	CTNNB1;EDN1;EDNRA;ERCC1;FOXO3;AMH;ANG;IGF1;IHH;MDK;MLH1;ATM;WNT4;PPP2R1A;PTN;BCL2;BMPR1B;SRC;BRCA2;ZP3;LGR5	9.46824	4.03e-13
GOBP_NEGATIVE_REGULATION_OF_CELLULAR_AMIDE_METABOLIC_PROCESS	MIR543;TOB1;DAPK1;EIF4EBP1;ANG;IGF1;APOE;EIF3E;MIR100;MIR10B;MIR132;MIR145;MIR148A;MIR17;MIR181C;MIR20A;MIR200B;MIR200C;MIR204;MIR205;MIR21;MIR210;MIR27B;MIR29C;MIR31;MLH1;MIR135B;YBX1;NTRK2;MIR378A;MIR503;ROCK1;MIR483;ZFP36	5.04575	4.38e-13
GOBP_INTEGRIN_MEDIATED_SIGNALING_PATHWAY	CCN2;FBLN1;FN1;HCK;ILK;ITGA2;ITGA5;ITGAM;ITGAV;ITGB1;ITGB3;ITGB8;LAMB1;PTN;SRC;THY1;TIMP1;VAV1;NRP1;CD40LG;CD47;CDC42	8.75153	4.41e-13
GOBP_RESPONSE_TO_PROSTAGLANDIN	CCR7;AKR1C2;EDN1;AKT1;ACACA;P2RY6;PTGER2;PTGER4;PTGFR;CCL19;CCL21;SFRP1;AKR1C3	26.5489	4.44e-13
GOBP_CARDIAC_SEPTUM_MORPHOGENESIS	SEMA3C;FGFR2;HEY1;GATA6;CCN1;RBPJ;SMAD4;MDM2;NOS3;NOTCH1;BMP4;BMP7;SLIT3;TGFB2;TGFBR1;TP53;NRP1;SLIT2	12.299	4.6e-13
GOBP_T_CELL_CYTOKINE_PRODUCTION	CD55;GATA3;TBX21;IL1B;IL1R1;IL4;IL6;IL18;ARG1;FOXP3;B2M;TNFRSF1B;CCR2;IL18R1	21.4611	4.74e-13
GOBP_CARDIAC_EPITHELIAL_TO_MESENCHYMAL_TRANSITION	HEY1;PDCD4;RBPJ;MIR21;SMAD4;NOTCH1;BMP4;SNAI2;SNAI1;TGFB1;TGFB2;TGFB3;TGFBR1;TWIST1	21.4611	4.74e-13
GOBP_METANEPHRIC_NEPHRON_MORPHOGENESIS	CTNNB1;GREM1;GDNF;HES5;LIF;PAX2;PDGFRB;WNT4;BMP4;SOX9;WT1;PAX8	33.9034	4.8e-13
GOBP_NEGATIVE_REGULATION_OF_B_CELL_APOPTOTIC_PROCESS	ADA;FOXP1;IL2;MIF;PDCD1;BCL2;BCL6;IRS2;BCL10;CD74	73.317	4.81e-13
GOBP_POSITIVE_REGULATION_OF_OSSIFICATION	OSR2;CCN1;LTF;SMAD3;WNT4;PTN;RXRA;BMP4;BMP7;BMPR1B;TACR1;TGFB1;TGFB2;TGFB3;VDR;ACVR2B	15.509	5.06e-13
GOBP_EMBRYONIC_SKELETAL_SYSTEM_DEVELOPMENT	OSR2;COL1A1;CTNNB1;EDNRA;MEGF8;FGF9;FGFR2;GLI3;HOXA11;HOXB4;IHH;SMAD2;SMAD3;MMP14;PDGFRA;SULF2;BMP4;BMP7;ZEB1;TGFB3;TGFBR1;TWIST1;HAND2	8.10913	5.22e-13
GOBP_EXOCRINE_SYSTEM_DEVELOPMENT	SEMA3C;EGFR;FGFR2;PLXND1;HGF;INSR;PDGFA;BMP7;SNAI2;SOX9;TGFB1;TGFB2;TGFB3;TNF;NRP1	17.8168	5.55e-13
GOBP_REGULATION_OF_EXTRINSIC_APOPTOTIC_SIGNALING_PATHWAY_IN_ABSENCE_OF_LIGAND	CSF2;AKT1;GDNF;IL1A;IL1B;IL7;INHBA;PF4;PPP2R1A;BCL2;BCL2L1;CX3CL1;SNAI2;TERT;TNF	17.8168	5.55e-13
[truncated: 1,317 more rows]
