# Supplementary material for: Molecular Mechanisms of Endometriosis Revealed Using Omics Data
Source: Biomedicines. 2023 Aug 7;11(8):2210. doi: 10.3390/biomedicines11082210 (PMC10452455; doi:10.3390/biomedicines11082210)
Supplement: Supplementary file 1 [file biomedicines-11-02210-s001.zip › Supplementary Table S3.xlsx]

## Sheet: emt.genes.kegg.sig.re
KEGG	Gens	OR	P value		KEGG: Koyto Encyclopedia of Genes and Genomics
KEGG_PATHWAYS_IN_CANCER	JUN;STAT3;HGF;BIRC5;FN1;BIRC3;IGF1;IGF1R;GSTP1;FZD7;MSH6;PGF;PTGS2;HIF1A;JAK1;AKT1;LAMC2;NRAS;ARNT;AXIN1;LAMB1;NFKB1;NFKBIA;TPM3;MYC;CSF1R;KRAS;TGFB2;TGFB1;TGFBR1;MET;TGFB3;FOXO1;BIRC2;PAX8;RARB;FGF9;MTOR;KITLG;FGF1;FGF2;WNT3A;NOS2;BAX;MAP2K1;FGFR2;RB1;CASP3;WNT4;SMAD3;ETS1;SMAD4;SMAD2;RUNX1;WNT7A;CTNNB1;PTEN;FOS;PDGFRB;MMP2;BRCA2;MMP1;BRAF;MMP9;MLH1;MDM2;ITGAV;ITGB1;DAPK1;RELA;VEGFA;VEGFC;CCND1;…	24.3121	1.89e-105		Gene: common genes between input genes and genes of a gene set
KEGG_CYTOKINE_CYTOKINE_RECEPTOR_INTERACTION	HGF;TNFSF10;CCL2;CCL5;CCL11;IL23A;FLT1;CCL14;IL22;CCL17;CCL19;CCL21;CCL22;CCL16;CSF2;CSF1R;CSF1;PRLR;PRL;TGFB2;TGFB1;CX3CL1;CXCL5;CCR2;CCL25;CSF3;TGFBR1;MET;TGFB3;CXCR3;CXCL12;CXCL10;INHBA;KITLG;CXCR4;IL1R2;TNFRSF11B;LEPR;CXCR6;LEP;LTA;IL17A;IL18;IL15;CXCL13;CD40LG;CXCL9;GH1;LIF;IL18R1;CX3CR1;PDGFRB;CXCL14;IL1A;VEGFA;VEGFC;CCR9;NGFR;PDGFA;ACVR2B;PDGFRA;ACVR1B;EPO;CXCL1;TNF;TNFRSF6B;IFNA1;CXCR2;CX…	29.3721	9.63e-104		OR: odds ratio
KEGG_CHEMOKINE_SIGNALING_PATHWAY	STAT3;CCL2;CCL5;CX3CR1;CCL11;ROCK1;BRAF;CXCL14;VAV1;CCL14;AKT1;CCL17;CCL19;NRAS;CCL21;CCL22;NFKB1;NFKBIA;CCL16;RELA;KRAS;CX3CL1;CXCL5;CCR9;CCR2;CCL25;CXCR3;CSK;FOXO3;PAK1;CRK;CXCL12;CDC42;CXCL10;PLCB1;CHUK;RAF1;PRKCB;CXCL1;SHC1;PLCB4;CXCR4;CXCR2;CXCR1;HCK;CXCL8;MAP2K1;CXCR6;CCR5;CCR7;CCR8;MAPK3;CXCL16;MAPK1;GSK3B;CCR1;CCL1;CXCL13;PF4;PF4V1;PIK3CA;PIK3CB;CXCL9;PIK3CD;PIK3CG;LYN	20.6354	8.86e-55
KEGG_FOCAL_ADHESION	JUN;HGF;FN1;IGF1;BIRC3;IGF1R;PGF;ROCK1;FLT1;AKT1;LAMC2;LAMB1;MET;BIRC2;THBS1;VWF;VTN;ACTN4;ACTN1;MAP2K1;ILK;CTNNB1;ACTB;PTEN;TNC;PAK4;ITGA5;PDGFRB;BRAF;VAV1;ITGB3;ITGAV;ITGB1;SPP1;COL1A1;VEGFA;VEGFC;ITGB8;CCND1;PDGFA;BCL2;PDGFRA;PAK1;CRK;CDC42;PRKCB;RAF1;PRKCA;SHC1;MYL9;ERBB2;KDR;MAPK3;MAPK1;MAPK8;EGFR;GSK3B;EGF;ITGA2;SRC;PIK3CA;PIK3CB;PIK3CD;PIK3CG	18.3304	1.06e-50
KEGG_PROSTATE_CANCER	CHUK;RAF1;IGF1;MTOR;CREB3L1;IGF1R;GSTP1;PDGFRB;ERBB2;BRAF;MAP2K1;FGFR2;MDM2;RB1;CREB1;AKT1;NRAS;MAPK3;NFKB1;NFKBIA;MAPK1;EGFR;RELA;GSK3B;KRAS;CDKN1B;EGF;CDKN1A;CTNNB1;AR;SRD5A2;CCND1;PTEN;BCL2;PDGFA;FOXO1;PDGFRA;TP53;PIK3CA;PIK3CB;CCNE2;PIK3CD;PIK3CG;CCNE1	36.9115	4.7e-45
KEGG_PANCREATIC_CANCER	STAT3;CHUK;RAF1;PGF;ERBB2;BRCA2;BRAF;MAP2K1;RB1;JAK1;AKT1;SMAD3;MAPK3;SMAD4;NFKB1;SMAD2;MAPK1;MAPK8;EGFR;RELA;KRAS;CDKN2A;EGF;TGFB2;TGFB1;VEGFA;VEGFC;TGFBR1;TGFB3;CCND1;BCL2L1;CDK4;TP53;PIK3CA;PIK3CB;CDK6;PIK3CD;PIK3CG;CDC42	47.3658	8.02e-43
KEGG_CHRONIC_MYELOID_LEUKEMIA	CHUK;RAF1;SHC1;BRAF;MAP2K1;MDM2;RB1;AKT1;NRAS;SMAD3;MAPK3;SMAD4;NFKB1;NFKBIA;MYC;MAPK1;RUNX1;RELA;CDKN2A;KRAS;CDKN1B;CDKN1A;TGFB2;TGFB1;TGFBR1;TGFB3;CCND1;BCL2L1;CDK4;TP53;CRK;PIK3CA;PIK3CB;CDK6;PIK3CD;HDAC1;HDAC2;PIK3CG	40.7618	3.24e-40
KEGG_NATURAL_KILLER_CELL_MEDIATED_CYTOTOXICITY	TNFSF10;HLA-G;BRAF;VAV1;NRAS;FCGR3B;ULBP3;FCGR3A;CSF2;KRAS;PAK1;KLRK1;RAF1;PRKCB;SHC1;KLRC1;PRKCA;TNF;ICAM1;IFNA1;HLA-C;HLA-B;KIR2DS5;KIR3DL1;KIR3DL2;MAP2K1;CASP3;TYROBP;IFNA13;MAPK3;MAPK1;KIR2DL1;CD48;KIR2DL4;KIR2DS1;ULBP2;KIR2DL3;IFNG;IFNGR1;NCR3;PIK3CA;PIK3CB;FAS;PIK3CD;FASLG;PIK3CG;SH2D1A	19.7547	6.4e-39
KEGG_MAPK_SIGNALING_PATHWAY	JUN;STMN1;AKT1;CD14;NRAS;NFKB1;MYC;MAPK14;KRAS;TGFB2;DUSP1;DUSP2;TGFB1;BDNF;TGFBR1;DUSP6;TGFB3;FGF9;FGF1;FGF2;IL1R2;PLA2G2A;MAP2K1;FGFR2;MAP2K7;CASP3;RASA1;FOS;PPP5C;PDGFRB;BRAF;IL1A;RELA;NGF;PDGFA;PDGFRA;PAK1;CRK;CDC42;RASGRP1;CHUK;PRKCB;RAF1;PRKCA;TNF;TNFRSF1A;MAPK3;MAPK1;MAPK8;EGFR;EGF;NTF4;IL1B;NTF3;IL1R1;TP53;FAS;NR4A1;FASLG;NTRK2	11.0615	1.81e-37
KEGG_COLORECTAL_CANCER	JUN;RAF1;BIRC5;MSH6;BRAF;MLH1;MAP2K1;BAX;AKT1;CASP3;AXIN1;SMAD3;MAPK3;SMAD4;MYC;SMAD2;MAPK1;MAPK8;GSK3B;KRAS;CTNNB1;TGFB2;TGFB1;TGFBR1;TGFB3;CCND1;BCL2;MSH2;TP53;PIK3CA;PIK3CB;PIK3CD;FOS;PIK3CG	45.4381	3.61e-37
KEGG_BLADDER_CANCER	RAF1;EGFR;CDKN2A;KRAS;EGF;CDKN1A;VEGFA;VEGFC;PGF;CXCL8;CCND1;ERBB2;MMP2;MMP1;BRAF;MMP9;MAP2K1;CDK4;MDM2;RB1;TP53;NRAS;MAPK3;DAPK2;DAPK1;THBS1;MYC;CDH1;MAPK1	83.0762	3.22e-36
KEGG_MELANOMA	RAF1;FGF9;HGF;IGF1;IGF1R;FGF1;FGF2;PDGFRB;BRAF;MAP2K1;MDM2;RB1;AKT1;NRAS;MAPK3;MAPK1;EGFR;CDKN2A;KRAS;CDKN1A;EGF;MET;CCND1;PTEN;PDGFA;PDGFRA;CDK4;TP53;PIK3CA;PIK3CB;CDK6;PIK3CD;PIK3CG;CDH1	34.3919	1.72e-34
KEGG_JAK_STAT_SIGNALING_PATHWAY	STAT3;STAT4;TYK2;IL23A;IL22;JAK1;AKT1;STAT6;MYC;CSF2;PRLR;PRL;CSF3;CCND1;BCL2L1;EPO;IFNA1;IL9;IL7R;IL12RB1;IL12B;IL13;LEPR;IFNA13;LEP;IL10;EPOR;IL11;IL2RB;IL15;IFNG;IFNGR1;IL21;IL2RA;IL2;IL7;PIK3CA;PIK3CB;PIK3CD;LIF;GH1;TSLP;IL4;PIK3CG;IL6	15.4356	1.12e-33
KEGG_T_CELL_RECEPTOR_SIGNALING_PATHWAY	JUN;PAK4;VAV1;AKT1;NRAS;NFKB1;NFKBIA;CTLA4;CSF2;MAPK14;RELA;KRAS;PAK1;CDC42;RASGRP1;CHUK;RAF1;TNF;CARD11;PDCD1;MAP2K1;MAP2K7;GRAP2;MAPK3;IL10;PTPRC;MAPK1;GSK3B;IFNG;IL2;CD40LG;CDK4;PIK3CA;PIK3CB;PIK3CD;BCL10;IL4;FOS;PIK3CG	21.2377	1.61e-33
KEGG_GLIOMA	PRKCB;RAF1;SHC1;PRKCA;IGF1;MTOR;IGF1R;PDGFRB;BRAF;MAP2K1;MDM2;RB1;AKT1;NRAS;MAPK3;MAPK1;EGFR;KRAS;CDKN2A;CDKN1A;EGF;CCND1;PTEN;PDGFA;PDGFRA;CDK4;TP53;PIK3CA;PIK3CB;CDK6;PIK3CD;PIK3CG	36.2281	4.84e-33
KEGG_SMALL_CELL_LUNG_CANCER	CHUK;RARB;FN1;BIRC3;PTGS2;NOS2;RXRA;RB1;SKP2;AKT1;ITGAV;LAMC2;ITGB1;LAMB1;NFKB1;NFKBIA;MYC;RELA;CDKN1B;CCND1;PTEN;ITGA2;BCL2;BCL2L1;BIRC2;CDK4;TP53;PIK3CA;PIK3CB;CCNE2;CDK6;PIK3CD;PIK3CG;CCNE1;CKS1B	26.7741	8.27e-33
KEGG_LEISHMANIA_INFECTION	JUN;PRKCB;TNF;ITGAM;IL12B;PTGS2;NOS2;IL1A;JAK1;ITGB1;MAPK3;FCGR3B;NFKB1;IL10;NFKBIA;FCGR3A;MAPK1;MAPK14;RELA;TGFB2;TGFB1;IFNG;IFNGR1;IL1B;TGFB3;HLA-DPB1;HLA-DQB1;C3;TLR4;IL4;TLR2;FOS;HLA-DRB1	31.6436	1.04e-32
KEGG_NEUROTROPHIN_SIGNALING_PATHWAY	JUN;BRAF;AKT1;NRAS;NFKB1;NFKBIA;MAPK14;RELA;KRAS;NGF;BDNF;NGFR;CSK;BCL2;FOXO3;IRS2;CRK;YWHAZ;CDC42;RAF1;SHC1;MAP2K1;BAX;MAP2K7;MAPK3;MAPK1;MAPK8;GSK3B;PSEN1;NTF4;NTF3;TP53;PIK3CA;PIK3CB;PIK3CD;FASLG;NTRK2;PIK3CG;NTRK3	16.8394	1.48e-30
KEGG_CELL_ADHESION_MOLECULES_CAMS	CDH3;CD86;CD274;ITGAM;CADM1;HLA-G;SELL;VCAM1;ITGAV;ITGB1;CTLA4;SELE;L1CAM;ITGB8;VCAN;HLA-DPB1;HLA-DQB1;SDC4;SDC1;PVR;HLA-DRB1;CDH1;NECTIN1;CLDN5;CLDN1;ICAM1;HLA-C;HLA-B;PDCD1;CD226;PTPRC;NECTIN3;NCAM1;CLDN11;CLDN7;CLDN4;CLDN3;CD40LG;CDH15	15.5763	1.51e-29
KEGG_ERBB_SIGNALING_PATHWAY	JUN;RAF1;PRKCB;SHC1;PRKCA;MTOR;PAK4;EIF4EBP1;ERBB2;BRAF;MAP2K1;MAP2K7;AKT1;NRAS;AREG;MAPK3;MYC;MAPK1;MAPK8;EGFR;GSK3B;KRAS;CDKN1B;CDKN1A;EGF;SRC;PAK1;CRK;PIK3CA;PIK3CB;PIK3CD;HBEGF;PIK3CG	22.8469	2.15e-29
KEGG_NEUROACTIVE_LIGAND_RECEPTOR_INTERACTION	PTGFR;PTGER2;PTGER4;TACR1;ADRA2B;THRA;RXFP1;DRD2;SSTR1;PRLR;PRL;PLG;AGTR1;AGTR2;SSTR4;TSPO;TRPV1;LEPR;LEP;FPR2;FPR1;OPRM1;ADRA1A;FSHB;LPAR3;GHRHR;LHB;FSHR;LHCGR;GH1;MAS1;F2;F2R;CRHR2;OXTR;CRHR1;P2RX5;P2RX3;BRS3;F2RL1;P2RY6;S1PR1;EDNRA;CHRM3;LTB4R2;CNR1;GNRHR;LPAR2;KISS1R;NR3C1;S1PR2;LTB4R	8.95482	5.32e-29
KEGG_REGULATION_OF_ACTIN_CYTOSKELETON	FN1;ROCK1;CD14;NRAS;KRAS;CFL1;CSK;FGF9;FGF1;FGF2;ACTN4;ACTN1;MAP2K1;FGFR2;LIMK1;ACTB;F2;F2R;ITGAM;PAK4;ITGA5;PDGFRB;BRAF;VAV1;ITGB3;ITGAV;ITGB1;CHRM3;ITGB8;PDGFA;PDGFRA;PAK1;CRK;EZR;CDC42;RAF1;MYL9;MAPK3;MAPK1;EGFR;EGF;ITGA2;PIK3CA;PIK3CB;PIK3CD;PIK3CG	10.4545	2.62e-28
KEGG_TOLL_LIKE_RECEPTOR_SIGNALING_PATHWAY	JUN;CD86;CCL5;AKT1;CD14;SPP1;NFKB1;NFKBIA;MAPK14;RELA;CXCL10;CHUK;TNF;IFNA1;CXCL8;IL12B;MAP2K1;MAP2K7;IFNA13;MAPK3;MAPK1;MAPK8;TICAM2;IL1B;PIK3CA;CXCL9;PIK3CB;PIK3CD;TLR3;TLR4;FOS;TLR2;PIK3CG;IL6	18.7053	4.87e-28
KEGG_RENAL_CELL_CARCINOMA	JUN;RAF1;HGF;SLC2A1;PAK4;PGF;BRAF;MAP2K1;HIF1A;AKT1;NRAS;ARNT;MAPK3;ETS1;MAPK1;KRAS;TGFB2;TGFB1;VEGFA;VEGFC;MET;TGFB3;PAK1;CRK;PIK3CA;PIK3CB;PIK3CD;PIK3CG;CDC42	26.3563	2.5e-27
KEGG_ENDOMETRIAL_CANCER	RAF1;ERBB2;BRAF;MLH1;MAP2K1;ILK;AKT1;NRAS;AXIN1;MAPK3;MYC;MAPK1;EGFR;GSK3B;KRAS;EGF;CTNNB1;CCND1;PTEN;FOXO3;TP53;PIK3CA;PIK3CB;PIK3CD;PIK3CG;CDH1	37.1666	2.51e-27
KEGG_NON_SMALL_CELL_LUNG_CANCER	PRKCB;RAF1;PRKCA;RARB;ERBB2;BRAF;MAP2K1;RB1;RXRA;AKT1;NRAS;MAPK3;MAPK1;EGFR;KRAS;CDKN2A;EGF;CCND1;FOXO3;CDK4;TP53;PIK3CA;PIK3CB;CDK6;PIK3CD;PIK3CG	34.5145	9.04e-27
KEGG_HEMATOPOIETIC_CELL_LINEAGE	EPO;TNF;ITGAM;CD36;KITLG;ITGA5;IL1R2;IL7R;MME;CD19;MS4A1;ITGB3;IL1A;CD14;EPOR;IL11;CSF2;CSF1R;CSF1;CD44;CD55;CSF3;IL1B;IL1R1;IL2RA;ITGA2;IL7;IL4;IL6;HLA-DRB1	19.6243	2.1e-25
KEGG_LEUKOCYTE_TRANSENDOTHELIAL_MIGRATION	ITGAM;ROCK1;MMP2;MMP9;VAV1;VCAM1;ITGB1;THY1;MAPK14;EZR;CXCL12;CDC42;PRKCB;PRKCA;MYL9;CLDN5;CLDN1;ICAM1;CXCR4;ACTN4;ACTN1;CTNNB1;CLDN11;CLDN7;CLDN4;CLDN3;ACTB;PIK3CA;PIK3CB;PIK3CD;PIK3CG	13.7631	1.5e-22
KEGG_B_CELL_RECEPTOR_SIGNALING_PATHWAY	JUN;CHUK;RAF1;PRKCB;CARD11;CD19;MAP2K1;VAV1;CD79A;AKT1;NRAS;MAPK3;NFKB1;NFKBIA;MAPK1;RELA;GSK3B;KRAS;BTK;PIK3CA;PIK3CB;PIK3CD;BCL10;FOS;PIK3CG;LYN	19.7181	2.85e-22
KEGG_STEROID_HORMONE_BIOSYNTHESIS	HSD3B2;UGT2B28;HSD3B1;COMT;CYP3A4;CYP11A1;AKR1C3;HSD11B2;SULT1E1;HSD17B2;HSD17B3;HSD17B1;CYP19A1;CYP17A1;HSD17B7;UGT1A1;AKR1C2;AKR1C1;CYP1A1;CYP1B1;STS;SRD5A2;SRD5A1	26.6464	4.51e-22
KEGG_TGF_BETA_SIGNALING_PATHWAY	TFDP1;TNF;INHBA;ROCK1;ID2;SMAD3;MAPK3;SMAD4;MYC;SMAD2;MAPK1;TGFB2;TGFB1;IFNG;PPP2R1A;FST;AMHR2;AMH;TGFBR1;LEFTY2;TGFB3;BMPR1B;ACVR2B;BMP4;BMP7;DCN;THBS1	17.0191	9.16e-22
KEGG_APOPTOSIS	CHUK;TNF;TNFSF10;BIRC3;BAX;IL1A;AKT1;CASP3;TNFRSF1A;ATM;NFKB1;NFKBIA;RELA;NGF;IL1RAP;IL1B;IL1R1;BCL2;BCL2L1;BIRC2;TP53;PIK3CA;PIK3CB;FAS;PIK3CD;FASLG;PIK3CG	16.7353	1.29e-21
KEGG_SYSTEMIC_LUPUS_ERYTHEMATOSUS	CD86;C9;H4C9;FCGR3B;H3-4;FCGR3A;C5;H4-16;H4C15;HLA-DPB1;HLA-DQB1;H4C14;H2AX;C3;C1R;HLA-DRB1;TNF;H4C4;H4C12;H4C6;H4C3;H4C11;H4C2;H4C8;ACTN4;H4C13;ACTN1;H4C5;H4C1;IL10;IFNG;CD40LG	11.3735	3.75e-21
KEGG_GRAFT_VERSUS_HOST_DISEASE	KIR2DL1;CD86;KLRC1;TNF;KIR2DL3;IFNG;HLA-C;HLA-B;IL1B;IL2;HLA-DPB1;HLA-G;KIR3DL1;KIR3DL2;HLA-DQB1;IL1A;FAS;FASLG;IL6;HLA-DRB1	35.2175	4.75e-21
KEGG_CELL_CYCLE	MDM2;ATM;MYC;TGFB2;TGFB1;PLK1;TGFB3;CCND1;CDC6;YWHAZ;CCNB1;CCNE1;TFDP1;CDK1;RB1;SKP2;SMAD3;SMAD4;SMAD2;GSK3B;CDKN2A;CDKN1B;CDKN1A;PCNA;CDK4;TP53;CCNE2;CDK6;HDAC1;HDAC2	11.7645	2.78e-20
KEGG_ACUTE_MYELOID_LEUKEMIA	CHUK;STAT3;RAF1;MTOR;CEBPA;EIF4EBP1;BRAF;MAP2K1;AKT1;NRAS;MAPK3;NFKB1;MYC;MAPK1;RUNX1;RELA;KRAS;CCND1;PIK3CA;PIK3CB;PIK3CD;PIK3CG	23.2819	2.98e-20
KEGG_ADHERENS_JUNCTION	SNAI2;IGF1R;ACTN4;ACTN1;SNAI1;ERBB2;SMAD3;MAPK3;SMAD4;INSR;SMAD2;MAPK1;NECTIN3;EGFR;CTNNB1;NECTIN4;TGFBR1;ACTB;MET;SRC;ACP1;CDC42;CDH1;NECTIN1	18.1703	4.87e-20
KEGG_EPITHELIAL_CELL_SIGNALING_IN_HELICOBACTER_PYLORI_INFECTION	JUN;CHUK;CXCL1;CCL5;NOD1;ADAM17;CXCR2;CXCR1;CXCL8;CASP3;NFKB1;NFKBIA;MAPK8;MAPK14;EGFR;RELA;MET;CSK;SRC;PAK1;HBEGF;LYN;CDC42	18.9454	1.39e-19
KEGG_FC_EPSILON_RI_SIGNALING_PATHWAY	RAF1;PRKCB;PRKCA;TNF;IL13;PLA2G2A;MAP2K1;VAV1;MAP2K7;AKT1;NRAS;MAPK3;MAPK1;CSF2;MAPK8;MAPK14;KRAS;BTK;PIK3CA;PIK3CB;PIK3CD;IL4;PIK3CG;LYN	16.1876	4.01e-19
KEGG_ADIPOCYTOKINE_SIGNALING_PATHWAY	STAT3;CHUK;PPARGC1A;TNF;SLC2A4;CD36;SLC2A1;MTOR;RXRA;TNFRSF1B;AKT1;TNFRSF1A;LEPR;LEP;NFKB1;NFKBIA;MAPK8;RELA;PPARA;ADIPOQ;IRS2;AGRP	18.1064	1.8e-18
KEGG_AXON_GUIDANCE	PAK4;PLXNC1;ROCK1;SLIT2;ITGB1;NRAS;SEMA6A;KRAS;L1CAM;CFL1;MET;SLIT3;PAK1;SEMA3C;CXCL12;CDC42;EPHB4;CXCR4;EPHB2;RASA1;NRP1;MAPK3;MAPK1;GSK3B;SEMA3E;DPYSL2;LIMK1;EPHA3	10.3082	8.84e-18
KEGG_GNRH_SIGNALING_PATHWAY	JUN;MMP2;NRAS;MAPK14;KRAS;GNRHR;GNRH1;HBEGF;CDC42;PLCB1;PRKCB;RAF1;PRKCA;PLCB4;PLA2G2A;MAP2K1;MAP2K7;MAPK3;MAPK1;MAPK8;EGFR;MMP14;SRC;FSHB;LHB	12.2059	1.74e-17
KEGG_P53_SIGNALING_PATHWAY	IGF1;CDK1;IGFBP3;BAX;MDM2;CASP3;ATM;CDKN2A;CDKN1A;CCND1;CD82;PTEN;CDK4;SERPINE1;TP53;CCNE2;FAS;CDK6;CCNB1;CCNE1;THBS1	16.534	4.5e-17
KEGG_NOD_LIKE_RECEPTOR_SIGNALING_PATHWAY	CHUK;CXCL1;TNF;BIRC3;CCL2;CCL5;NOD1;CCL11;CXCL8;MAPK3;NFKB1;NFKBIA;MAPK1;MAPK8;MAPK14;IL18;RELA;IL1B;BIRC2;IL6	17.6068	9.55e-17
KEGG_THYROID_CANCER	PAX8;KRAS;CTNNB1;CCND1;BRAF;MAP2K1;RXRA;PPARG;TP53;NRAS;MAPK3;MYC;TPM3;CDH1;MAPK1	39.4398	1.29e-16
KEGG_TYPE_I_DIABETES_MELLITUS	LTA;CD86;TNF;IFNG;HLA-C;HLA-B;IL1B;IL2;IL12B;HLA-DPB1;HLA-G;HLA-DQB1;IL1A;HSPD1;FAS;FASLG;HLA-DRB1	24.1212	3.6e-16
KEGG_ALLOGRAFT_REJECTION	CD86;TNF;IFNG;HLA-C;HLA-B;IL2;CD40LG;IL12B;HLA-DPB1;HLA-G;HLA-DQB1;FAS;FASLG;IL4;IL10;HLA-DRB1	28.077	4.73e-16
KEGG_VEGF_SIGNALING_PATHWAY	RAF1;PRKCB;PRKCA;NOS3;PLA2G2A;PTGS2;MAP2K1;KDR;AKT1;NRAS;MAPK3;MAPK1;MAPK14;KRAS;VEGFA;SRC;PIK3CA;PIK3CB;PIK3CD;PIK3CG;CDC42	14.123	5.69e-16
KEGG_COMPLEMENT_AND_COAGULATION_CASCADES	F2;F2R;VWF;KNG1;MBL2;F3;SERPINA1;PLAU;C9;CD55;C5;CPB2;FGA;SERPINE1;PLG;C3;CFD;C1R;CFI;SERPING1	15.0835	1e-15
KEGG_ANTIGEN_PROCESSING_AND_PRESENTATION	KLRC1;IFNA1;HLA-C;HLA-B;KIR2DS5;HLA-G;KIR3DL1;KIR3DL2;CREB1;CD74;HSPA4;IFNA13;KIR2DL1;LTA;KIR2DL4;KIR2DS1;KIR2DL3;HLA-DPB1;PDIA3;HLA-DQB1;B2M;HLA-DRB1	12.3389	1.18e-15
KEGG_INSULIN_SIGNALING_PATHWAY	PPARGC1A;EIF4EBP1;HK1;BRAF;AKT1;NRAS;ACACA;KRAS;FOXO1;IRS2;CRK;RAF1;SHC1;SLC2A4;MTOR;MAP2K1;MAPK3;INSR;MAPK1;MAPK8;GSK3B;LIPE;PIK3CA;PIK3CB;PIK3CD;PIK3CG	8.69252	4.09e-15
KEGG_PRION_DISEASES	EGR1;NCAM1;NOTCH1;CCL5;C5;IL1B;SOD1;STIP1;MAP2K1;BAX;IL1A;C9;MAPK3;IL6;MAPK1	27.6167	4.64e-15
KEGG_WNT_SIGNALING_PATHWAY	JUN;SFRP2;SFRP1;FZD7;ROCK1;MMP7;AXIN1;MYC;CCND1;CACYBP;PLCB1;PRKCB;PRKCA;PLCB4;WNT3A;DKK1;WNT4;SMAD3;SMAD4;SMAD2;MAPK8;WNT7A;GSK3B;PSEN1;CTNNB1;PPP2R1A;TP53	8.08573	5.72e-15
KEGG_FC_GAMMA_R_MEDIATED_PHAGOCYTOSIS	VAV1;AKT1;FCGR3A;CFL1;PAK1;CRK;CDC42;PRKCB;RAF1;PRKCA;HCK;DNM1L;MAP2K1;MAPK3;PTPRC;MAPK1;LIMK1;PIK3CA;PIK3CB;PIK3CD;PIK3CG;LYN	11.0008	8.46e-15
KEGG_LONG_TERM_DEPRESSION	PLCB1;RAF1;PRKCB;PRKCA;PLCB4;IGF1;CRHR1;CRH;IGF1R;PLA2G2A;BRAF;MAP2K1;NOS1;NRAS;MAPK3;MAPK1;KRAS;PPP2R1A;LYN	13.7578	2e-14
KEGG_ECM_RECEPTOR_INTERACTION	VWF;FN1;CD36;VTN;ITGA5;ITGB3;LAMC2;ITGAV;ITGB1;SPP1;COL1A1;LAMB1;CD47;CD44;ITGB8;ITGA2;TNC;SDC4;SDC1;THBS1	11.5485	6.38e-14
KEGG_ALDOSTERONE_REGULATED_SODIUM_REABSORPTION	NR3C2;PRKCB;PRKCA;KRAS;IGF1;NEDD4L;HSD11B2;IRS2;PIK3CA;PIK3CB;PIK3CD;MAPK3;INSR;PIK3CG;MAPK1	20.4561	1.18e-13
KEGG_MTOR_SIGNALING_PATHWAY	IGF1;MTOR;EIF4EBP1;PGF;BRAF;HIF1A;AKT1;MAPK3;CAB39L;MAPK1;VEGFA;VEGFC;PIK3CA;PIK3CB;PIK3CD;PIK3CG	16.3788	2.61e-13
KEGG_AUTOIMMUNE_THYROID_DISEASE	CD86;IFNA1;HLA-C;HLA-B;HLA-G;IFNA13;IL10;CTLA4;IL2;CD40LG;HLA-DPB1;HLA-DQB1;FAS;FASLG;IL4;HLA-DRB1	16.3788	2.61e-13
KEGG_PROGESTERONE_MEDIATED_OOCYTE_MATURATION	RAF1;IGF1;CDK1;IGF1R;BRAF;MAP2K1;AKT1;MAPK3;MAPK1;MAPK8;MAPK14;KRAS;PLK1;PGR;PIK3CA;PIK3CB;PIK3CD;CCNB1;PIK3CG	10.6278	9.16e-13
KEGG_INTESTINAL_IMMUNE_NETWORK_FOR_IGA_PRODUCTION	CD86;IL15;TGFB1;CCR9;CXCR4;CCL25;IL2;CD40LG;HLA-DPB1;HLA-DQB1;CXCL12;IL4;IL10;IL6;HLA-DRB1	16.7372	1.13e-12
KEGG_MELANOGENESIS	CREB3L1;FZD7;CREB1;EDN1;NRAS;KRAS;PLCB1;PRKCB;RAF1;PRKCA;PLCB4;KITLG;WNT3A;MAP2K1;WNT4;MAPK3;MAPK1;GSK3B;WNT7A;CTNNB1	9.12095	2.58e-12
KEGG_GAP_JUNCTION	PLCB1;RAF1;PRKCB;PRKCA;PLCB4;CDK1;PDGFRB;MAP2K1;NRAS;MAPK3;DRD2;MAPK1;EGFR;KRAS;EGF;GJA1;SRC;PDGFA;PDGFRA	9.87859	2.72e-12
KEGG_TYPE_II_DIABETES_MELLITUS	MAPK8;TNF;SLC2A4;MTOR;HK1;ADIPOQ;IRS2;PIK3CA;PIK3CB;PIK3CD;MAPK3;INSR;PIK3CG;MAPK1	15.6009	1.34e-11
KEGG_ENDOCYTOSIS	F2R;IGF1R;HLA-G;FLT1;MDM2;CSF1R;NEDD4L;MET;PDGFRA;CDC42;VTA1;HLA-C;CXCR4;HLA-B;CXCR2;CXCR1;DNM1L;FGFR2;KDR;CCR5;EGFR;IL2RB;EGF;IL2RA;SRC	5.93568	2.22e-11
KEGG_METABOLISM_OF_XENOBIOTICS_BY_CYTOCHROME_P450	UGT2B28;CYP3A4;GSTP1;GSTT1;AKR1C3;GSTM1;CYP2C19;CYP2B6;GSTM2;UGT1A1;GSTK1;AKR1C2;AKR1C1;CYP1A1;CYP1A2;CYP1B1	10.9118	3.98e-11
KEGG_TIGHT_JUNCTION	AKT1;NRAS;KRAS;CDC42;PRKCB;PRKCA;MYL9;CLDN5;CLDN1;ACTN4;ACTN1;CTNNB1;CLDN11;PPP2R1A;CLDN7;CLDN4;CLDN3;ACTB;SRC;PTEN;CDK4	7.05312	5.08e-11
KEGG_ASTHMA	TNF;CCL11;IL9;CD40LG;HLA-DPB1;IL13;HLA-DQB1;RNASE3;IL4;IL10;HLA-DRB1	21.2465	1.64e-10
KEGG_CALCIUM_SIGNALING_PATHWAY	PTGFR;F2R;OXTR;P2RX5;P2RX3;TACR1;PDGFRB;EDNRA;CHRM3;LTB4R2;PDGFRA;AGTR1;PLCB1;PRKCB;PRKCA;PLCB4;ERBB2;NOS3;NOS2;NOS1;EGFR;ADRA1A;LHCGR	5.4861	5.36e-10
KEGG_AMYOTROPHIC_LATERAL_SCLEROSIS_ALS	TNF;CAT;SOD1;NOS1;BAX;NEFM;TNFRSF1B;CASP3;TNFRSF1A;MAPK14;BCL2;BCL2L1;TP53	11.943	1.05e-09
KEGG_CYTOSOLIC_DNA_SENSING_PATHWAY	CXCL10;CHUK;CCL5;IFNA1;IFNA13;NFKB1;NFKBIA;IL18;RELA;IL33;IL1B;ADAR;IL6	11.3766	1.72e-09
KEGG_HYPERTROPHIC_CARDIOMYOPATHY_HCM	TNF;IGF1;ITGA5;ITGB3;ITGAV;ITGB1;TPM3;TGFB2;TGFB1;ITGB8;ACTB;TGFB3;ITGA2;ACE;IL6	8.11602	5.24e-09
KEGG_DRUG_METABOLISM_CYTOCHROME_P450	UGT2B28;CYP3A4;GSTP1;GSTT1;FMO2;GSTM1;CYP2C19;CYP2B6;GSTM2;UGT1A1;MAOB;MAOA;GSTK1;CYP1A2	8.87458	6.28e-09
KEGG_VASCULAR_SMOOTH_MUSCLE_CONTRACTION	CALD1;ROCK1;BRAF;EDNRA;AGTR1;PLCB1;PRKCB;RAF1;PRKCA;PLCB4;MYL9;PLA2G2A;MAP2K1;MAPK3;MAPK1;ACTA2;ADRA1A	6.38868	1.22e-08
KEGG_PATHOGENIC_ESCHERICHIA_COLI_INFECTION	PRKCA;CLDN1;ROCK1;CD14;ITGB1;CTNNB1;ACTB;EZR;TLR4;YWHAZ;CDC42;CDH1	10.0121	2.4e-08
KEGG_VIRAL_MYOCARDITIS	CD86;ICAM1;HLA-C;HLA-B;HLA-G;CASP3;CD55;ACTB;CD40LG;CCND1;HLA-DPB1;HLA-DQB1;HLA-DRB1	8.37848	3.89e-08
KEGG_DORSO_VENTRAL_AXIS_FORMATION	NOTCH4;EGFR;NOTCH1;KRAS;MAP2K1;MAPK3;ETS1;MAPK1	18.3044	1.29e-07
KEGG_RENIN_ANGIOTENSIN_SYSTEM	REN;AGT;AGTR1;ACE;AGTR2;MAS1;MME	25.5945	1.48e-07
KEGG_BASAL_CELL_CARCINOMA	FZD7;WNT3A;AXIN1;WNT4;GSK3B;WNT7A;CTNNB1;GLI1;BMP4;GLI3;TP53	9.17037	1.95e-07
KEGG_BASE_EXCISION_REPAIR	XRCC1;HMGB1;OGG1;PCNA;APEX1;POLD1;POLE;FEN1;PARP1	12.6763	2.57e-07
KEGG_ARACHIDONIC_ACID_METABOLISM	AKR1C3;ALOX15;PLA2G2A;PTGS2;CYP2C19;CYP2B6;PTGES;GPX3;GPX4;CYP4F3;HPGDS	8.5847	3.46e-07
KEGG_RIG_I_LIKE_RECEPTOR_SIGNALING_PATHWAY	CXCL10;CHUK;TNF;IFNA1;CXCL8;IL12B;IFNA13;NFKB1;NFKBIA;MAPK8;MAPK14;RELA	7.463	3.8e-07
KEGG_DILATED_CARDIOMYOPATHY	TNF;IGF1;ITGA5;ITGB3;ITGAV;ITGB1;TPM3;TGFB2;TGFB1;ITGB8;ACTB;TGFB3;ITGA2	6.19921	8.23e-07
KEGG_OOCYTE_MEIOSIS	IGF1;IGF1R;PLK1;PGR;YWHAZ;CCNB1;CCNE1;CDK1;MAP2K1;MAPK3;MAPK1;PPP2R1A;AR;CCNE2	5.19438	2.09e-06
KEGG_LONG_TERM_POTENTIATION	PLCB1;RAF1;PRKCB;PRKCA;PLCB4;BRAF;MAP2K1;NRAS;MAPK3;MAPK1;KRAS	6.83666	2.45e-06
KEGG_PRIMARY_IMMUNODEFICIENCY	IL7R;ADA;CD40LG;BTK;CD19;CD79A;PTPRC;DCLRE1C	10.843	3.17e-06
KEGG_NOTCH_SIGNALING_PATHWAY	HES5;NOTCH4;NOTCH1;PSEN1;ADAM17;RBPJ;DLL4;HDAC1;HDAC2	8.67403	3.72e-06
KEGG_ARRHYTHMOGENIC_RIGHT_VENTRICULAR_CARDIOMYOPATHY_ARVC	ITGA5;ACTN4;ACTN1;ITGB3;ITGAV;ITGB1;CTNNB1;GJA1;ITGB8;ACTB;ITGA2	6.40205	4.29e-06
KEGG_HEDGEHOG_SIGNALING_PATHWAY	WNT3A;IHH;WNT4;GSK3B;WNT7A;GLI1;BMP4;BMP7;GLI3	7.01123	1.67e-05
KEGG_NUCLEOTIDE_EXCISION_REPAIR	MNAT1;ERCC6;ERCC2;PCNA;ERCC1;POLD1;POLE;GTF2H1	8.13244	1.93e-05
KEGG_HUNTINGTONS_DISEASE	PPARGC1A;CREB3L1;CREB1;DCTN4;BDNF;PLCB1;PLCB4;SOD1;SOD2;BAX;CASP3;TBPL2;PPARG;TP53;HDAC1;HDAC2	3.5411	3.46e-05
KEGG_PHOSPHATIDYLINOSITOL_SIGNALING_SYSTEM	PLCB1;PRKCB;PRKCA;PLCB4;IMPA2;PTEN;PIK3CA;PIK3CB;PIK3CD;PIK3CG	5.54971	3.49e-05
KEGG_ALZHEIMERS_DISEASE	ADAM17;MME;APOE;PLCB1;PLCB4;TNF;NOS1;CASP3;TNFRSF1A;MAPK3;MAPK1;GSK3B;PSEN1;IL1B;FAS	3.64736	4.38e-05
KEGG_TRYPTOPHAN_METABOLISM	MAOB;MAOA;IDO1;CAT;CYP1A1;CYP1A2;CYP1B1	7.75721	8.3e-05
KEGG_INOSITOL_PHOSPHATE_METABOLISM	PLCB1;PLCB4;IMPA2;PTEN;PIK3CA;PIK3CB;PIK3CD;PIK3CG	6.36264	8.95e-05
KEGG_GLYCINE_SERINE_AND_THREONINE_METABOLISM	MAOB;MAOA;GATM;SRR;SARDH;CTH	8.76938	0.000150269
KEGG_CYSTEINE_AND_METHIONINE_METABOLISM	DNMT1;DNMT3A;DNMT3B;CTH;MAT2A;DNMT3L	7.83034	0.000256352
