# Supplementary material for: Molecular Mechanisms of Endometriosis Revealed Using Omics Data
Source: Biomedicines. 2023 Aug 7;11(8):2210. doi: 10.3390/biomedicines11082210 (PMC10452455; doi:10.3390/biomedicines11082210)
Supplement: Supplementary file 1 [file biomedicines-11-02210-s001.zip › Supplementary Table S4.xlsx]

## Sheet: Supplementary Table S4
Variant and risk allele	P-value	RAF	OR	CI	Mapped gene	Reported trait	Trait(s)	Study accession	Location			OR: odds ratio
rs6908034-<b>?</b>	5 x 10-7	NR	1.22	[1.12-1.32]	LNC-LBCS	Endometriosis	endometriosis	GCST004368	6:19773699			RAF: risk allele frequency
rs12700667-<b>?</b>	6 x 10-7	NR	1.17	[1.09-1.25]	TSEN15P3, MIR148A	Endometriosis	endometriosis	GCST004368	7:25862019			Location: genomic location of variants
rs55938609-<b>?</b>	6 x 10-7	NR	1.24	[1.15-1.35]	WNT4	Endometriosis	endometriosis	GCST004368	1:22143958
rs116175374-<b>?</b>	6 x 10-7	NR	1.44928	[1.23-1.69]	CAPN14	Endometriosis	endometriosis	GCST004368	2:31202319
rs60966186-<b>?</b>	1 x 10-6	NR	1.17647	[1.09-1.27]	DEFA10P, DEFA1	Endometriosis	endometriosis	GCST004368	8:6973682
rs138913144-<b>?</b>	6 x 10-7	NR	1.2987	[1.15-1.45]	LAMC3	Endometriosis	endometriosis	GCST004368	9:131022553
rs144240142-<b>?</b>	6 x 10-8	NR	1.71	[1.23-2.37]	MAP3K4	Ovarian disease with few adhesions	endometriosis	GCST004369	6:161081992
rs200922190-<b>?</b>	2 x 10-7	NR	1.20482	[1.10-1.33]	CDC73	Ovarian disease with few adhesions	endometriosis	GCST004369	1:193234362
rs855965-<b>?</b>	4 x 10-7	NR	1.23457	[1.14-1.35]	LINC02674	Ovarian disease with few adhesions	endometriosis	GCST004369	10:117684248
rs113850637-<b>?</b>	8 x 10-7	NR	1.28	[1.16-1.41]	RAP1BP2	Ovarian disease with few adhesions	endometriosis	GCST004369	3:104131556
rs12700667-<b>?</b>	2 x 10-9	NR	1.32	[1.20-1.46]	TSEN15P3, MIR148A	Deep ovarian and/or rectovaginal disease with dense adhesions	endometriosis	GCST004370	7:25862019
rs517875-<b>?</b>	1 x 10-7	NR	1.23	[1.13-1.33]	NAALADL2	Deep ovarian and/or rectovaginal disease with dense adhesions	endometriosis	GCST004370	3:174633096
rs7041895-<b>?</b>	1 x 10-7	NR	1.26	[1.16-1.37]	CDKN2B-AS1	Deep ovarian and/or rectovaginal disease with dense adhesions	endometriosis	GCST004370	9:22162795
rs1250258-<b>?</b>	3 x 10-8	NR	1.23457	[1.14-1.35]	FN1	Deep ovarian and/or rectovaginal disease with dense adhesions	endometriosis	GCST004370	2:215435462
rs71415016-<b>?</b>	3 x 10-7	NR	1.38	[1.20-1.59]	TUNAR, C14orf132	Deep ovarian and/or rectovaginal disease with dense adhesions	endometriosis	GCST004370	14:95977621
rs62469231-<b>?</b>	5 x 10-7	NR	1.77	[1.37-2.27]	FOXP2	Deep ovarian and/or rectovaginal disease with dense adhesions	endometriosis	GCST004370	7:114391119
rs3920498-<b>?</b>	6 x 10-7	NR	1.3	[1.18-1.43]	WNT4, MIR4418	Deep ovarian and/or rectovaginal disease with dense adhesions	endometriosis	GCST004370	1:22166394
rs6908034-<b>?</b>	7 x 10-7	NR	1.3	[1.17-1.45]	LNC-LBCS	Deep ovarian and/or rectovaginal disease with dense adhesions	endometriosis	GCST004370	6:19773699
rs12455952-<b>?</b>	1 x 10-6	NR	1.27	[1.15-1.40]	-	Deep ovarian and/or rectovaginal disease with dense adhesions	endometriosis	GCST004370	18:61173285
rs138913144-<b>?</b>	1 x 10-6	NR	1.47059	[1.23-1.75]	LAMC3	Deep ovarian and/or rectovaginal disease with dense adhesions	endometriosis	GCST004370	9:131022553
rs2663839-<b>T</b>	9 x 10-6	0.2345	1.769	[1.372-2.281]	ATP8B1, RSL24D1P11	Endometriosis	endometriosis	GCST004873	18:57818282
rs144824657-<b>T</b>	1 x 10-6	0.01631	3.521	[2.042-6.072]	BSG	Endometriosis	endometriosis	GCST004873	19:577782
rs11085835-<b>T</b>	3 x 10-7	0.2908	2.047	[1.546-2.709]	CACNA1A	Endometriosis	endometriosis	GCST004873	19:13221196
rs10419023-<b>T</b>	6 x 10-7	0.04694	3.013	[1.91-4.75]	GRIN2D	Endometriosis	endometriosis	GCST004873	19:48427965
rs2327293-<b>G</b>	7 x 10-6	0.2299	1.846	[1.409-2.42]	SDAD1P2, SNAP25-AS1	Endometriosis	endometriosis	GCST004873	20:10385750
rs6075004-<b>A</b>	9 x 10-6	0.309	1.68	[1.333-2.119]	MACROD2	Endometriosis	endometriosis	GCST004873	20:16086119
rs2929986-<b>T</b>	4 x 10-6	0.4485	1.67	[1.34-2.083]	CCN4	Endometriosis	endometriosis	GCST004873	8:133199283
rs116250606-<b>T</b>	1 x 10-7	0.028	3.242	[2.052-5.121]	CALHM3	Endometriosis	endometriosis	GCST004873	10:103473496
rs3820445-<b>G</b>	6 x 10-7	0.1312	2.042	[1.534-2.719]	BEND5, AGBL4	Endometriosis	endometriosis	GCST004873	1:48758912
rs1009077-<b>A</b>	4 x 10-6	0.2234	1.783	[1.389-2.29]	PDE5A, LINC01365	Endometriosis	endometriosis	GCST004873	4:119706266
rs1432089-<b>A</b>	6 x 10-8	0.263	1.928	[1.516-2.452]	RNU6ATAC13P	Endometriosis	endometriosis	GCST004873	4:170869637
rs11132055-<b>T</b>	8 x 10-8	0.169	2.092	[1.588-2.755]	-	Endometriosis	endometriosis	GCST004873	4:181401652
rs458649-<b>A</b>	6 x 10-6	0.189	1.846	[1.409-2.418]	-	Endometriosis	endometriosis	GCST004873	5:4269377
rs62355900-<b>C</b>	5 x 10-8	0.1394	2.115	[1.608-2.783]	MAP3K1	Endometriosis	endometriosis	GCST004873	5:56756868
rs644045-<b>T</b>	2 x 10-8	0.2853	1.955	[1.541-2.48]	C2	Endometriosis	endometriosis	GCST004873	6:31916180
rs2300795-<b>C</b>	5 x 10-7	0.01436	3.591	[2.107-6.119]	COL12A1	Endometriosis	endometriosis	GCST004873	6:75115465
rs1750034-<b>T</b>	7 x 10-7	0.1042	2.018	[1.521-2.678]	SYNJ2	Endometriosis	endometriosis	GCST004873	6:158059112
rs75801644-<b>A</b>	8 x 10-10	0.01823	3.882	[2.44-6.176]	GPNMB	Endometriosis	endometriosis	GCST004873	7:23266522
rs7781172-<b>T</b>	1 x 10-6	0.04686	2.393	[1.659-3.45]	-	Endometriosis	endometriosis	GCST004873	7:49030398
rs16901004-<b>T</b>	9 x 10-7	0.198	1.866	[1.45-2.403]	LINC00861	Endometriosis	endometriosis	GCST004873	8:125958758
rs6578185-<b>A</b>	2 x 10-6	0.4932	1.80571	[1.41-2.31]	MROH5	Endometriosis	endometriosis	GCST004873	8:141447953
rs17277593-<b>A</b>	5 x 10-6	0.2127	1.802	[1.396-2.327]	PES1P2, LINC00583	Endometriosis	endometriosis	GCST004873	9:13950594
rs6540-<b>A</b>	3 x 10-6	0.02028	3.038	[1.867-4.944]	PSMD13	Endometriosis	endometriosis	GCST004873	11:252649
rs2615943-<b>T</b>	7 x 10-6	0.2895	1.661	[1.328-2.076]	KIAA1549L	Endometriosis	endometriosis	GCST004873	11:33417589
rs7942368-<b>T</b>	9 x 10-9	0.2423	2.072	[1.609-2.668]	GUCY2EP, TSKU	Endometriosis	endometriosis	GCST004873	11:76754318
rs427244-<b>A</b>	4 x 10-7	0.165	1.926	[1.489-2.493]	RFLNA	Endometriosis	endometriosis	GCST004873	12:124120741
rs10131751-<b>A</b>	9 x 10-7	0.05641	2.495	[1.711-3.637]	BNIP3P1	Endometriosis	endometriosis	GCST004873	14:28212010
rs1380131-<b>A</b>	9 x 10-6	0.1011	2.087	[1.497-2.909]	RPS3AP46	Endometriosis	endometriosis	GCST004873	14:53606140
rs10129516-<b>T</b>	5 x 10-16	0.1156	3.104	[2.329-4.136]	RHOJ, PARP1P2	Endometriosis	endometriosis	GCST004873	14:63133372
rs7149767-<b>A</b>	7 x 10-6	0.274	1.736	[1.361-2.213]	MARK3	Endometriosis	endometriosis	GCST004873	14:103397208
rs74781061-<b>G</b>	1 x 10-6	0.121	2.188	[1.579-3.032]	ARID3B	Endometriosis	endometriosis	GCST004873	15:74595855
rs12943477-<b>T</b>	6 x 10-6	0.6407	1.83621	[1.4-2.4]	COX10-AS1	Endometriosis	endometriosis	GCST004873	17:13912543
rs7521902-<b>A</b>	3 x 10-11	0.238	1.19	[1.13-1.25]	WNT4, MIR4418	Endometriosis	endometriosis	GCST001720	1:22164231
rs13394619-<b>G</b>	6 x 10-9	0.521	1.15	[1.09-1.20]	GREB1	Endometriosis	endometriosis	GCST001720	2:11587381
rs4141819-<b>C</b>	9 x 10-8	0.309	1.15	[1.09-1.21]	XIAPP3, LINC02831	Endometriosis	endometriosis	GCST001720	2:67637543
rs7739264-<b>T</b>	4 x 10-10	0.515	1.17	[1.11-1.23]	LNC-LBCS	Endometriosis	endometriosis	GCST001720	6:19785357
rs12700667-<b>A</b>	4 x 10-9	0.744	1.18	[1.11-1.25]	TSEN15P3, MIR148A	Endometriosis	endometriosis	GCST001720	7:25862019
rs1537377-<b>C</b>	2 x 10-9	0.401	1.15	[1.10-1.21]	CDKN2B-AS1	Endometriosis	endometriosis	GCST001720	9:22169701
rs10859871-<b>C</b>	5 x 10-13	0.295	1.2	[1.14-1.26]	MIR3685	Endometriosis	endometriosis	GCST001720	12:95318100
rs11692361-<b>?</b>	4 x 10-7	NR	1.43885	[1.25-1.65]	MEIS1	Endometriosis	endometriosis	GCST003819	2:66496567
rs10256972-<b>?</b>	3 x 10-6	NR	1.29	[1.162-1.433]	C7orf50	Endometriosis	endometriosis	GCST003819	7:999367
rs4966038-<b>?</b>	2 x 10-9	NR	1.378	[1.242-1.529]	IGF1R	Endometriosis	endometriosis	GCST003819	15:98903403
rs2276314-<b>?</b>	7 x 10-6	NR	1.31406	[1.17-1.48]	C18orf21	Endometriosis	endometriosis	GCST003819	18:35977503
rs801112-<b>C</b>	5 x 10-6	0.11	1.65	[1.33-2.05]	SPTA1	Endometriosis	endometriosis	GCST000797	1:228860875
rs6542095-<b>C</b>	3 x 10-6	0.72	1.5	[1.27-1.78]	IL1A, CKAP2L	Endometriosis	endometriosis	GCST000797	2:112771606
rs10965235-<b>C</b>	6 x 10-12	0.802	1.44	[1.30-1.59]	CDKN2B-AS1	Endometriosis	endometriosis	GCST000721	9:22115106
rs16826658-<b>G</b>	2 x 10-6	0.523	1.2	[1.11-1.29]	-	Endometriosis	endometriosis	GCST000721	Mapping not available
rs12024204-<b>G</b>	6 x 10-6	0.52	1.22	[1.07-1.18]	-	Endometriosis	endometriosis	GCST000916	1:79777316
rs2738113-<b>G</b>	3 x 10-7	0.44	1.15	[1.09-1.22]	DEFA1, DEFA10P	Endometriosis	endometriosis	GCST000916	8:6971563
rs12700667-<b>A</b>	1 x 10-9	0.74	1.2	[1.13-1.27]	TSEN15P3, MIR148A	Endometriosis	endometriosis	GCST000916	7:25862019
rs11193561-<b>A</b>	6 x 10-6	0.239	1.19	[NR]	LINC01435	Endometriosis	endometriosis	GCST001894	10:107614626
rs12449465-<b>G</b>	1 x 10-6	0.125	1.26	[NR]	OR1G1, OR1E3	Endometriosis	endometriosis	GCST001894	17:3126260
rs6757804-<b>G</b>	6 x 10-8	0.401	1.2	[1.13-1.29]	-	Endometriosis	endometriosis	GCST001894	2:150779318
rs10975519-<b>A</b>	9 x 10-7	0.3	1.19	[NR]	IL33	Endometriosis	endometriosis	GCST001894	9:6253571
rs4654783-<b>T</b>, rs10917151-<b>A</b>, rs2235529-<b>T</b>	7 x 10-9	0.152	1.28	[NR]	CDC42 - WNT4; CDC42; WNT4	Endometriosis	endometriosis	GCST001894	1:22113027|1:22096228|1:22123994
rs4654783-<b>G</b>, rs10917151-<b>G</b>, rs2235529-<b>C</b>	6 x 10-6	0.709	1.19	[NR]	CDC42 - WNT4; CDC42; WNT4	Endometriosis	endometriosis	GCST001894	1:22113027|1:22096228|1:22123994
rs16826658-<b>G</b>, rs4654783-<b>T</b>, rs7521902-<b>A</b>, rs10917151-<b>A</b>, rs2235529-<b>T</b>	8 x 10-7	0.134	1.25	[NR]	No mapped genes; CDC42 - WNT4; WNT4 - MIR4418; CDC42; WNT4	Endometriosis	endometriosis	GCST001894	1:22113027|1:22164231|1:22096228|1:22123994
rs2235529-<b>A</b>	3 x 10-9	0.153	1.3	[1.19-1.41]	WNT4	Endometriosis	endometriosis	GCST001894	1:22123994
rs6907340-<b>A</b>	2 x 10-7	0.371	1.2	[1.12-1.28]	LNC-LBCS	Endometriosis	endometriosis	GCST001894	6:19803537
rs2270221-<b>A</b>	1 x 10-6	0.267	1.2	[NR]	PDE1C	Endometriosis	endometriosis	GCST001894	7:31864413
rs7816936-<b>A</b>	6 x 10-6	0.446	1.1628	[NR]	RN7SL318P	Endometriosis	endometriosis	GCST001894	8:5213890
rs10508881-<b>A</b>	4 x 10-7	0.405	1.19	[1.11-1.27]	LINC00841	Endometriosis	endometriosis	GCST001894	10:44046117
rs3596-<b>G</b>	2 x 10-6	0.472	1.17	[NR]	VEZT	Endometriosis	endometriosis	GCST001894	12:95302644
rs10431397-<b>A</b>	7 x 10-6	0.012	1.73	[NR]	KSR2	Endometriosis	endometriosis	GCST001894	12:117668389
rs1268843-<b>A</b>	3 x 10-6	0.263	1.19	[NR]	CYB5AP3, MOAP1	Endometriosis	endometriosis	GCST001894	14:93178034
rs71575922-<b>G</b>	2 x 10-8	0.16	1.11	1.07-1.16	SYNE1	Endometriosis	endometriosis	GCST004549	6:152232879
rs760794-<b>T</b>	7 x 10-8	0.43	1.08	1.05-1.11	LNC-LBCS	Endometriosis	endometriosis	GCST004549	6:19790329
rs12700667-<b>A</b>	2 x 10-8	0.74	1.09	1.06-1.13	TSEN15P3, MIR148A	Endometriosis	endometriosis	GCST004549	7:25862019
rs10757272-<b>C</b>	6 x 10-6	0.504	1.06	1.04-1.09	CDKN2B-AS1	Endometriosis	endometriosis	GCST004549	9:22088261
rs1448792-<b>G</b>	1 x 10-7	0.741	1.09	1.05-1.12	LINC01239	Endometriosis	endometriosis	GCST004549	9:22641634
rs1537377-<b>C</b>	2 x 10-8	0.4	1.08	1.05-1.11	CDKN2B-AS1	Endometriosis	endometriosis	GCST004549	9:22169701
rs74485684-<b>T</b>	3 x 10-8	0.84	1.11	1.07-1.16	FSHB	Endometriosis	endometriosis	GCST004549	11:30220740
rs4762326-<b>T</b>	1 x 10-6	0.47	1.07	1.04-1.10	VEZT	Endometriosis	endometriosis	GCST004549	12:95275175
rs12037376-<b>A</b>	2 x 10-6	0.58	1.28	1.16-1.42	WNT4	Endometriosis	endometriosis	GCST004549	1:22135618
rs4762326-<b>G</b>	4 x 10-6	0.98	1.22	1.12-1.33	VEZT	Endometriosis	endometriosis	GCST004549	12:95275175
rs12037376-<b>A</b>	9 x 10-17	0.17	1.16	1.12?1.19	WNT4	Endometriosis	endometriosis	GCST004549	1:22135618
rs11674184-<b>T</b>	3 x 10-17	0.61	1.13	1.10?1.15	GREB1	Endometriosis	endometriosis	GCST004549	2:11581409
rs6546324-<b>A</b>	3 x 10-8	0.31	1.08	1.05?1.11	LINC02831	Endometriosis	endometriosis	GCST004549	2:67629358
rs10167914-<b>G</b>	1 x 10-9	0.3	1.12	1.08?1.15	IL1B, IL1A	Endometriosis	endometriosis	GCST004549	2:112805784
rs1903068-<b>A</b>	1 x 10-11	0.68	1.11	1.07?1.13	KDR, RN7SL822P	Endometriosis	endometriosis	GCST004549	4:55142310
rs760794-<b>T</b>	2 x 10-10	0.43	1.09	1.06?1.12	LNC-LBCS	Endometriosis	endometriosis	GCST004549	6:19790329
rs12700667-<b>A</b>	9 x 10-10	0.74	1.1	1.07?1.13	TSEN15P3, MIR148A	Endometriosis	endometriosis	GCST004549	7:25862019
rs1537377-<b>C</b>	1 x 10-10	0.4	1.09	1.06?1.12	CDKN2B-AS1	Endometriosis	endometriosis	GCST004549	9:22169701
rs4762326-<b>T</b>	2 x 10-9	0.47	1.08	1.05?1.11	VEZT	Endometriosis	endometriosis	GCST004549	12:95275175
rs1971256-<b>C</b>	4 x 10-8	0.2	1.09	1.06?1.13	CCDC170	Endometriosis	endometriosis	GCST004549	6:151494876
rs71575922-<b>G</b>	2 x 10-8	0.16	1.11	1.07?1.15	SYNE1	Endometriosis	endometriosis	GCST004549	6:152232879
rs74485684-<b>T</b>	2 x 10-8	0.84	1.11	1.07?1.15	FSHB	Endometriosis	endometriosis	GCST004549	11:30220740
rs77294520-<b>C</b>	1 x 10-12	0.147	1.16	1.11-1.21	GREB1	Endometriosis	endometriosis	GCST004549	2:11520829
rs2206949-<b>T</b>	3 x 10-7	0.262	1.1	1.06-1.14	ESR1	Endometriosis	endometriosis	GCST004549	6:151716421
rs17803970-<b>A</b>	7 x 10-8	0.92	1.15	1.09-1.21	SYNE1	Endometriosis	endometriosis	GCST004549	6:152232583
rs10757272-<b>C</b>	3 x 10-7	0.504	1.07	1.04-1.10	CDKN2B-AS1	Endometriosis	endometriosis	GCST004549	9:22088261
rs1448792-<b>G</b>	2 x 10-7	0.741	1.08	1.05-1.12	LINC01239	Endometriosis	endometriosis	GCST004549	9:22641634
rs12037376-<b>A</b>	1 x 10-12	0.17	1.14	1.10-1.19	WNT4	Endometriosis	endometriosis	GCST004549	1:22135618
rs10167914-<b>G</b>	5 x 10-8	0.3	1.11	1.07-1.15	IL1B, IL1A	Endometriosis	endometriosis	GCST004549	2:112805784
rs11674184-<b>T</b>	3 x 10-14	0.61	1.12	1.09-1.15	GREB1	Endometriosis	endometriosis	GCST004549	2:11581409
rs6546324-<b>A</b>	3 x 10-7	0.31	1.08	1.05-1.11	LINC02831	Endometriosis	endometriosis	GCST004549	2:67629358
rs77294520-<b>C</b>	1 x 10-12	0.147	1.16	1.11-1.21	GREB1	Endometriosis	endometriosis	GCST004549	2:11520829
rs1903068-<b>A</b>	2 x 10-11	0.68	1.11	1.07-1.14	KDR, RN7SL822P	Endometriosis	endometriosis	GCST004549	4:55142310
rs17803970-<b>A</b>	1 x 10-7	0.92	1.15	1.09-1.21	SYNE1	Endometriosis	endometriosis	GCST004549	6:152232583
rs1971256-<b>C</b>	1 x 10-7	0.2	1.1	1.06-1.13	CCDC170	Endometriosis	endometriosis	GCST004549	6:151494876
rs1998998-<b>A</b>	7 x 10-6	0.1294	2.277	[1.567-3.31]	LINC02304	Endometriosis	endometriosis	GCST012024	14:97214482
rs6576560-<b>C</b>	1 x 10-5	0.5059	1.92	[1.451-2.541]	LINC02248	Endometriosis	endometriosis	GCST012024	15:26332200
rs10799737-<b>?</b>	1 x 10-6	-	1.31579	[1.18-1.47]	WNT4	Endometriosis	endometriosis	GCST009832	1:22135638
rs6432216-<b>?</b>	2 x 10-7	-	1.38889	[1.22-1.56]	GREB1	Endometriosis	endometriosis	GCST009832	2:11562834
rs146467657-<b>?</b>	4 x 10-6	-	3.57	[2.08-6.13]	RPS15AP14	Endometriosis	endometriosis	GCST009832	2:175271278
rs899269-<b>?</b>	8 x 10-6	-	1.33333	[1.18-1.54]	LINC01967	Endometriosis	endometriosis	GCST009832	3:27976587
rs59618069-<b>?</b>	6 x 10-7	-	1.51	[1.28-1.77]	RN7SL808P, CIR1P2	Endometriosis	endometriosis	GCST009832	4:114744719
rs140574374-<b>?</b>	7 x 10-6	-	2.58	[1.71-3.90]	RBM48P1	Endometriosis	endometriosis	GCST009832	4:126617656
rs142903570-<b>?</b>	5 x 10-6	-	2.58	[1.71-3.88]	MIR6082, LINC02504	Endometriosis	endometriosis	GCST009832	4:171283490
rs73005745-<b>?</b>	8 x 10-6	-	2.91	[1.82-4.65]	-	Endometriosis	endometriosis	GCST009832	4:179748675
rs2145735-<b>?</b>	9 x 10-6	-	1.36986	[1.19-1.56]	TRDN	Endometriosis	endometriosis	GCST009832	6:123570856
rs12193197-<b>?</b>	9 x 10-6	-	1.40845	[1.22-1.64]	WDR27	Endometriosis	endometriosis	GCST009832	6:169509938
rs76280028-<b>?</b>	6 x 10-6	-	1.92	[1.45-2.55]	SEPTIN7	Endometriosis	endometriosis	GCST009832	7:35906649
rs77060522-<b>?</b>	5 x 10-6	-	2.9	[1.83-4.57]	XKR4	Endometriosis	endometriosis	GCST009832	8:55224726
rs112755922-<b>?</b>	5 x 10-6	-	1.31	[1.17-1.47]	U8	Endometriosis	endometriosis	GCST009832	8:71785294
rs149472935-<b>?</b>	3 x 10-6	-	3.31	[2.00-5.49]	-	Endometriosis	endometriosis	GCST009832	8:116466081
rs150445207-<b>?</b>	7 x 10-7	-	3.91	[2.28-6.70]	EIF3H	Endometriosis	endometriosis	GCST009832	8:116575863
rs76329314-<b>?</b>	2 x 10-6	-	2.38	[1.66-3.41]	-	Endometriosis	endometriosis	GCST009832	8:141966149
rs140369471-<b>?</b>	1 x 10-6	-	2.98	[1.91-4.63]	ITGB1-DT	Endometriosis	endometriosis	GCST009832	10:33051630
rs145528548-<b>?</b>	5 x 10-6	-	2.11	[1.53-2.91]	RNU6-376P, DDX6	Endometriosis	endometriosis	GCST009832	11:118724436
rs181692738-<b>?</b>	5 x 10-6	-	2.99	[1.87-4.79]	TMTC1	Endometriosis	endometriosis	GCST009832	12:29523791
rs192897046-<b>?</b>	6 x 10-6	-	2.5	[1.68-3.71]	OBI1-AS1	Endometriosis	endometriosis	GCST009832	13:78524671
rs576308820-<b>?</b>	7 x 10-6	-	3.41	[2.00-5.81]	GPC5	Endometriosis	endometriosis	GCST009832	13:91985331
rs1772557-<b>?</b>	4 x 10-6	-	1.34	[1.18-1.52]	-	Endometriosis	endometriosis	GCST009832	13:103712876
rs80235011-<b>?</b>	4 x 10-6	-	2	[1.49-2.69]	GPATCH2L	Endometriosis	endometriosis	GCST009832	14:76223645
rs12934561-<b>?</b>	8 x 10-6	-	1.2987	[1.15-1.45]	IL32	Endometriosis	endometriosis	GCST009832	16:3068864
rs933376-<b>?</b>	1 x 10-6	-	1.54	[1.29-1.84]	COX10-AS1	Endometriosis	endometriosis	GCST009832	17:13898274
rs118025155-<b>?</b>	1 x 10-6	-	2.61	[1.77-3.85]	COP1P1, RN7SL50P	Endometriosis	endometriosis	GCST009832	18:8431083
rs149551327-<b>?</b>	4 x 10-6	-	1.9	[1.44-2.49]	AP1M2, SLC44A2	Endometriosis	endometriosis	GCST009832	19:10592480
rs285682-<b>?</b>	5 x 10-6	-	1.35	[1.19-1.53]	KCTD15, CHST8	Endometriosis	endometriosis	GCST009832	19:33784343
rs118172039-<b>?</b>	3 x 10-6	-	1.9	[1.45-2.48]	PLCB1	Endometriosis	endometriosis	GCST009832	20:8083907
rs2218611-<b>?</b>	6 x 10-6	-	1.38	[1.20-1.58]	MIR513B, MIR513A1	Endometriosis	endometriosis	GCST009832	X:147212189
rs12037376-<b>?</b>	1 x 10-6	-	1.31	(1.17-1.46)	WNT4	Endometriosis	endometriosis	GCST009832	1:22135618
rs117631020-<b>?</b>	2 x 10-6	-	1.07527	[1.04-1.11]	DIPK1A	Endometriosis (MTAG)	endometriosis	GCST009831	1:92898985
rs142412260-<b>?</b>	1 x 10-6	-	1.1	[1.06-1.14]	MIR181A1HG	Endometriosis (MTAG)	endometriosis	GCST009831	1:198808540
rs192897046-<b>?</b>	6 x 10-6	-	1.1	[1.06-1.15]	OBI1-AS1	Endometriosis (MTAG)	endometriosis	GCST009831	13:78524671
rs142527987-<b>?</b>	7 x 10-6	-	1.14	[1.08-1.20]	SH3BP4	Endometriosis (MTAG)	endometriosis	GCST009831	2:234998703
rs821492-<b>?</b>	3 x 10-6	-	1.0989	[1.06-1.15]	UBE2F-SCLY	Endometriosis (MTAG)	endometriosis	GCST009831	2:238050409
rs80235011-<b>?</b>	4 x 10-6	-	1.08	[1.05-1.12]	GPATCH2L	Endometriosis (MTAG)	endometriosis	GCST009831	14:76223645
rs6767661-<b>?</b>	8 x 10-6	-	1.03093	[1.02-1.05]	NEPRO, LINC02044	Endometriosis (MTAG)	endometriosis	GCST009831	3:113073831
rs7170666-<b>?</b>	4 x 10-6	-	1.03	[1.02-1.04]	MIR1179, MIR7-2	Endometriosis (MTAG)	endometriosis	GCST009831	15:88611735
rs59618069-<b>?</b>	8 x 10-7	-	1.05	[1.03-1.07]	RN7SL808P, CIR1P2	Endometriosis (MTAG)	endometriosis	GCST009831	4:114744719
rs140574374-<b>?</b>	6 x 10-6	-	1.11	[1.06-1.16]	RBM48P1	Endometriosis (MTAG)	endometriosis	GCST009831	4:126617656
rs118025155-<b>?</b>	2 x 10-6	-	1.11	[1.07-1.16]	COP1P1, RN7SL50P	Endometriosis (MTAG)	endometriosis	GCST009831	18:8431083
rs75339189-<b>?</b>	3 x 10-6	-	1.1	[1.05-1.14]	KCNG2	Endometriosis (MTAG)	endometriosis	GCST009831	18:79899553
rs116832992-<b>?</b>	9 x 10-6	-	1.06	[1.03-1.09]	PDE1C, PPP1R17	Endometriosis (MTAG)	endometriosis	GCST009831	7:31745141
rs76274733-<b>?</b>	7 x 10-6	-	1.09	[1.05-1.13]	LINC01605	Endometriosis (MTAG)	endometriosis	GCST009831	8:37520631
rs190312022-<b>?</b>	2 x 10-6	-	1.13	[1.07-1.19]	ITGB1-DT	Endometriosis (MTAG)	endometriosis	GCST009831	10:33013148
rs113537648-<b>A</b>	3 x 10-8	NR	-	[6.27-13.17]	PLEKHM3	Endometriosis	endometriosis	GCST90018839	2:207846287
rs12173791-<b>A</b>	5 x 10-12	NR	-	[0.13-0.24]	CCDC170	Endometriosis	endometriosis	GCST90018839	6:151503314
rs993184-<b>G</b>	5 x 10-9	NR	-	[0.073-0.146]	ZNF619P1, HMGN1P19	Endometriosis	endometriosis	GCST90018839	7:46630950
rs35698191-<b>A</b>	1 x 10-9	NR	-	[0.084-0.163]	CDCA2	Endometriosis	endometriosis	GCST90018839	8:25464329
rs398088169-<b>C</b>	6 x 10-10	NR	-	[0.079-0.152]	DMRTA1, CDKN2B-AS1	Endometriosis	endometriosis	GCST90018839	9:22158441
rs2235529-<b>T</b>	2 x 10-9	NR	-	[0.091-0.179]	WNT4	Endometriosis	endometriosis	GCST90018839	1:22123994
rs7580473-<b>T</b>	1 x 10-9	NR	-	[0.13-0.26]	GREB1	Endometriosis	endometriosis	GCST90018839	2:11518846
rs7412010-<b>C</b>	2 x 10-9	0.578485	-	[0.14-0.28]	CDC42, WNT4	Endometriosis	endometriosis	GCST90018619	1:22109953
rs12192060-<b>T</b>	3 x 10-8	0.13357	-	[0.19-0.41]	R3HDM2P2, GRIK2	Endometriosis	endometriosis	GCST90018619	6:103766100
rs6782972-<b>G</b>	3 x 10-9	NR	1.20482	[1.15-1.26]	RN7SL216P	Endometriosis or endometrial cancer (pleiotropy)	endometrial carcinoma, endometriosis	GCST005906	3:24922859
rs10008492-<b>T</b>	2 x 10-6	NR	1.14	[1.08-1.2]	RNA5SP158, TLR10	Endometriosis or endometrial cancer (pleiotropy)	endometrial carcinoma, endometriosis	GCST005906	4:38764099
rs9349553-<b>T</b>	5 x 10-6	NR	1.14	[1.08-1.2]	TFAP2D	Endometriosis or endometrial cancer (pleiotropy)	endometrial carcinoma, endometriosis	GCST005906	6:50747694
rs2475335-<b>T</b>	2 x 10-6	NR	1.15	[1.09-1.21]	PTPRD	Endometriosis or endometrial cancer (pleiotropy)	endometrial carcinoma, endometriosis	GCST005906	9:10260263
rs2218868-<b>T</b>	4 x 10-8	NR	1.15	[1.09-1.21]	OR9Q1	Endometriosis or endometrial cancer (pleiotropy)	endometrial carcinoma, endometriosis	GCST005906	11:58158505
rs523332-<b>G</b>	5 x 10-6	NR	1.14943	[1.09-1.21]	PGR, ARHGAP42	Endometriosis or endometrial cancer (pleiotropy)	endometrial carcinoma, endometriosis	GCST005906	11:101003588
rs2278868-<b>T</b>	5 x 10-7	NR	1.14943	[1.09-1.21]	SKAP1	Endometriosis or endometrial cancer (pleiotropy)	endometrial carcinoma, endometriosis	GCST005906	17:48184809
rs9915454-<b>A</b>	5 x 10-6	NR	1.13	[1.07-1.19]	CEP112, AXIN2	Endometriosis or endometrial cancer (pleiotropy)	endometrial carcinoma, endometriosis	GCST005906	17:65633120
rs7084339-<b>A</b>	7 x 10-6	NR	1.04	NR	PLCE1-AS1, PLCE1	Endometriosis or migraine	migraine disorder, endometriosis	GCST010178	10:94283975
rs9486705-<b>C</b>	6 x 10-6	NR	1.11111	NR	FHL5	Endometriosis or migraine	migraine disorder, endometriosis	GCST010178	6:96611055
rs7544256-<b>A</b>	1 x 10-7	NR	1.05	NR	TTC34, NGF-AS1	Endometriosis or migraine	migraine disorder, endometriosis	GCST010178	1:115281777
rs114323125-<b>C</b>	2 x 10-6	NR	1.08696	NR	SNX16	Endometriosis or migraine	migraine disorder, endometriosis	GCST010178	8:81828713
rs2397690-<b>T</b>	8 x 10-6	NR	1.05	NR	MCHR2-AS1	Endometriosis or migraine	migraine disorder, endometriosis	GCST010178	6:99995415
rs6488439-<b>A</b>	5 x 10-6	NR	1.07527	NR	ETV6, LINC01252	Endometriosis or migraine	migraine disorder, endometriosis	GCST010178	12:11621221
rs17135931-<b>A</b>	6 x 10-8	NR	1.06	NR	EXOC2	Endometriosis or migraine	migraine disorder, endometriosis	GCST010178	6:625188
rs112495680-<b>G</b>	5 x 10-6	NR	1.06383	NR	RPL35P2, SMIM29	Endometriosis or migraine	migraine disorder, endometriosis	GCST010178	6:34255321
rs9645504-<b>C</b>	7 x 10-6	NR	1.07	NR	RPL5P26, COL13A1	Endometriosis or migraine	migraine disorder, endometriosis	GCST010178	10:69800640
rs6549387-<b>T</b>	2 x 10-6	NR	1.08	NR	FOXP1	Endometriosis or migraine	migraine disorder, endometriosis	GCST010178	3:71382988
rs11031005-<b>T</b>	1 x 10-8	NR	1.08	NR	ARL14EP-DT	Endometriosis or migraine	migraine disorder, endometriosis	GCST010178	11:30204809
rs11960401-<b>C</b>	9 x 10-6	NR	1.09	NR	WSPAR	Endometriosis or migraine	migraine disorder, endometriosis	GCST010178	5:133894264
rs35863760-<b>C</b>	8 x 10-6	NR	1.05263	NR	RBFOX3	Endometriosis or migraine	migraine disorder, endometriosis	GCST010178	17:79538987
rs13062850-<b>T</b>	7 x 10-6	NR	1.12	NR	LINC01991, LPP-AS2	Endometriosis or migraine	migraine disorder, endometriosis	GCST010178	3:188071920
rs146462216-<b>G</b>	8 x 10-6	NR	1.04167	NR	RNU7-156P, NR3C1	Endometriosis or migraine	migraine disorder, endometriosis	GCST010178	5:143445440
rs35722758-<b>G</b>	6 x 10-6	NR	1.14	NR	KIF18B	Endometriosis or migraine	migraine disorder, endometriosis	GCST010178	17:44927467
rs112796779-<b>A</b>	6 x 10-6	NR	1.15	NR	LRP1B	Endometriosis or migraine	migraine disorder, endometriosis	GCST010178	2:140549061
rs725964-<b>A</b>	9 x 10-6	NR	1.04167	NR	ETV1	Endometriosis or migraine	migraine disorder, endometriosis	GCST010178	7:13948898
rs151257179-<b>G</b>	2 x 10-6	NR	1.17	NR	ZNF438, LINC02644	Endometriosis or migraine	migraine disorder, endometriosis	GCST010178	10:30795527
rs721839-<b>C</b>	5 x 10-6	NR	1.04167	NR	MTND2P9	Endometriosis or migraine	migraine disorder, endometriosis	GCST010178	9:80602054
rs10795984-<b>A</b>	1 x 10-6	NR	1.04167	NR	CAMK1D	Endometriosis or migraine	migraine disorder, endometriosis	GCST010178	10:12814058
rs7073342-<b>T</b>	8 x 10-6	NR	1.04167	NR	ASCC1	Endometriosis or migraine	migraine disorder, endometriosis	GCST010178	10:72211079
rs12936464-<b>A</b>	2 x 10-6	NR	1	NR	POLR2A	Endometriosis or migraine	migraine disorder, endometriosis	GCST010178	17:7500623
rs13409739-<b>G</b>	8 x 10-6	NR	1.04	NR	ERBB4	Endometriosis or migraine	migraine disorder, endometriosis	GCST010178	2:211715459
rs162212-<b>A</b>	6 x 10-6	NR	1.04	NR	GRM7	Endometriosis or migraine	migraine disorder, endometriosis	GCST010178	3:7797790
rs8089784-<b>G</b>	9 x 10-6	NR	1.19048	NR	BCL2	Endometriosis or migraine	migraine disorder, endometriosis	GCST010178	18:63261832
rs938875-<b>A</b>	4 x 10-6	NR	1.04	NR	MAP2K5	Endometriosis or migraine	migraine disorder, endometriosis	GCST010178	15:67660584
rs56325297-<b>T</b>	8 x 10-7	NR	1.11111	NR	DPP6	Endometriosis or migraine	migraine disorder, endometriosis	GCST010178	7:153851229
rs72809316-<b>A</b>	6 x 10-6	NR	1.05	NR	LINC01485, LINC01484	Endometriosis or migraine	migraine disorder, endometriosis	GCST010178	5:173749476
rs59479500-<b>G</b>	6 x 10-6	NR	1.07527	NR	SBF2	Endometriosis or migraine	migraine disorder, endometriosis	GCST010178	11:10011438
rs17400865-<b>T</b>	3 x 10-6	NR	1.06	NR	LINC02163	Endometriosis or migraine	migraine disorder, endometriosis	GCST010178	5:104197628
rs10859847-<b>G</b>	6 x 10-6	NR	1.07527	NR	FGD6	Endometriosis or migraine	migraine disorder, endometriosis	GCST010178	12:95197757
rs12714497-<b>G</b>	5 x 10-6	NR	1.07	NR	HNRNPA3P8	Endometriosis or migraine	migraine disorder, endometriosis	GCST010178	3:80259111
rs2474725-<b>C</b>	6 x 10-6	NR	1.06383	NR	NRP1	Endometriosis or migraine	migraine disorder, endometriosis	GCST010178	10:33195338
rs1445920-<b>C</b>	6 x 10-6	NR	1.05263	NR	LINC02059	Endometriosis or migraine	migraine disorder, endometriosis	GCST010178	5:86798133
rs718737-<b>G</b>	5 x 10-6	NR	1.05263	NR	ST7, MTND4P6	Endometriosis or migraine	migraine disorder, endometriosis	GCST010178	7:117243537
rs12251016-<b>T</b>	5 x 10-7	NR	1.05263	NR	MLLT10	Endometriosis or migraine	migraine disorder, endometriosis	GCST010178	10:21532989
rs4955263-<b>C</b>	9 x 10-6	NR	1.12	NR	RPSAP11, CMTM8	Endometriosis or migraine	migraine disorder, endometriosis	GCST010178	3:32222872
rs4346346-<b>A</b>	1 x 10-6	NR	1.04167	NR	MMADHC-DT, LINC01931	Endometriosis or migraine	migraine disorder, endometriosis	GCST010178	2:149813850
rs11836750-<b>G</b>	8 x 10-6	NR	1.13	NR	LINC02388	Endometriosis or migraine	migraine disorder, endometriosis	GCST010178	12:58711963
rs4700924-<b>A</b>	3 x 10-6	NR	1.04167	NR	RASGEF1C, MAPK9	Endometriosis or migraine	migraine disorder, endometriosis	GCST010178	5:180218870
rs1873291-<b>T</b>	3 x 10-6	NR	1.04167	NR	EYS	Endometriosis or migraine	migraine disorder, endometriosis	GCST010178	6:65634962
rs143943961-<b>C</b>	2 x 10-6	NR	1.17	NR	ROBO2	Endometriosis or migraine	migraine disorder, endometriosis	GCST010178	3:76492703
rs35698191-<b>A</b>	6 x 10-6	NR	1.04167	NR	CDCA2	Endometriosis or migraine	migraine disorder, endometriosis	GCST010178	8:25464329
rs79270576-<b>C</b>	2 x 10-6	NR	1.18	NR	-	Endometriosis or migraine	migraine disorder, endometriosis	GCST010178	1:5226867
rs3097165-<b>G</b>	4 x 10-6	NR	1.18	NR	RPL7AP33, BNIP1	Endometriosis or migraine	migraine disorder, endometriosis	GCST010178	5:173165707
rs112332086-<b>T</b>	8 x 10-6	NR	1.09	[NR]	LINC01829, LINC01828	Endometriosis or migraine	migraine disorder, endometriosis	GCST010178	2:67226594
rs9885896-<b>A</b>	4 x 10-9	-	-	[0.016-0.032]	ADH5P4	Endometriosis or depression (pleiotropy)	endometriosis, unipolar depression	GCST010859	6:65886038
rs12206488-<b>T</b>	2 x 10-9	-	-	[0.02-0.04]	-	Endometriosis or depression (pleiotropy)	endometriosis, unipolar depression	GCST010859	6:66290024
rs2328370-<b>A</b>	3 x 10-8	-	-	[0.015-0.031]	HIVEP2, LY86	Endometriosis or depression (pleiotropy)	endometriosis, unipolar depression	GCST010859	6:142685569
rs9347896-<b>A</b>	1 x 10-8	-	-	[0.018-0.038]	-	Endometriosis or depression (pleiotropy)	endometriosis, unipolar depression	GCST010859	6:164656716
rs11561993-<b>T</b>	2 x 10-9	-	-	[0.016-0.033]	-	Endometriosis or depression (pleiotropy)	endometriosis, unipolar depression	GCST010859	7:109462798
rs11784932-<b>A</b>	3 x 10-8	-	-	[0.017-0.035]	CCDC26	Endometriosis or depression (pleiotropy)	endometriosis, unipolar depression	GCST010859	8:129083232
rs1931391-<b>A</b>	8 x 10-9	-	-	[0.016-0.032]	-	Endometriosis or depression (pleiotropy)	endometriosis, unipolar depression	GCST010859	9:11213674
rs62553458-<b>A</b>	9 x 10-9	-	-	[0.033-0.067]	KLF9	Endometriosis or depression (pleiotropy)	endometriosis, unipolar depression	GCST010859	9:11695224
rs13299293-<b>A</b>	2 x 10-8	-	-	[0.016-0.033]	SLC25A6P2	Endometriosis or depression (pleiotropy)	endometriosis, unipolar depression	GCST010859	9:31234707
rs2212333-<b>A</b>	8 x 10-9	-	-	[0.016-0.032]	GRM5	Endometriosis or depression (pleiotropy)	endometriosis, unipolar depression	GCST010859	11:89035729
rs7358418-<b>T</b>	6 x 10-9	-	-	[0.017-0.035]	TYR	Endometriosis or depression (pleiotropy)	endometriosis, unipolar depression	GCST010859	11:89236970
rs9538160-<b>A</b>	3 x 10-8	-	-	[0.015-0.032]	DNAJA1P1	Endometriosis or depression (pleiotropy)	endometriosis, unipolar depression	GCST010859	13:58680025
rs35625885-<b>A</b>	1 x 10-8	-	-	[0.023-0.048]	TUBAP12, PGAM1P12	Endometriosis or depression (pleiotropy)	endometriosis, unipolar depression	GCST010859	15:96414739
rs1395455-<b>A</b>	4 x 10-8	-	-	[0.016-0.033]	FTLP18, GRIK3	Endometriosis or depression (pleiotropy)	endometriosis, unipolar depression	GCST010859	1:36719589
rs1620977-<b>A</b>	1 x 10-8	-	-	[0.017-0.036]	NEGR1	Endometriosis or depression (pleiotropy)	endometriosis, unipolar depression	GCST010859	1:72263459
rs6680839-<b>T</b>	9 x 10-10	-	-	[0.017-0.033]	RPS29P5, COP1	Endometriosis or depression (pleiotropy)	endometriosis, unipolar depression	GCST010859	1:175933460
rs2175177-<b>A</b>	1 x 10-8	-	-	[0.015-0.032]	U7, COP1	Endometriosis or depression (pleiotropy)	endometriosis, unipolar depression	GCST010859	1:176214920
rs11809140-<b>T</b>	2 x 10-8	-	-	[0.015-0.031]	MORF4L1P7	Endometriosis or depression (pleiotropy)	endometriosis, unipolar depression	GCST010859	1:176349468
rs72740410-<b>T</b>	1 x 10-8	-	-	[0.031-0.063]	UBE2V1P8, HNRNPA1P46	Endometriosis or depression (pleiotropy)	endometriosis, unipolar depression	GCST010859	1:191145969
rs78108344-<b>T</b>	2 x 10-9	-	-	[0.02-0.04]	CRB1	Endometriosis or depression (pleiotropy)	endometriosis, unipolar depression	GCST010859	1:197419740
rs12118913-<b>T</b>	2 x 10-9	-	-	[0.02-0.039]	DENND1B	Endometriosis or depression (pleiotropy)	endometriosis, unipolar depression	GCST010859	1:197543274
rs2224873-<b>A</b>	1 x 10-9	-	-	[0.02-0.04]	DENND1B	Endometriosis or depression (pleiotropy)	endometriosis, unipolar depression	GCST010859	1:197676319
rs12121863-<b>A</b>	4 x 10-10	-	-	[0.023-0.043]	C1orf53, DENND1B	Endometriosis or depression (pleiotropy)	endometriosis, unipolar depression	GCST010859	1:197816290
rs9586-<b>T</b>	2 x 10-10	-	-	[0.022-0.041]	KLHDC8B	Endometriosis or depression (pleiotropy)	endometriosis, unipolar depression	GCST010859	3:49176204
rs6778080-<b>T</b>	3 x 10-9	-	-	[0.018-0.036]	USP4	Endometriosis or depression (pleiotropy)	endometriosis, unipolar depression	GCST010859	3:49279905
rs9835157-<b>A</b>	4 x 10-10	-	-	[0.023-0.044]	IP6K1	Endometriosis or depression (pleiotropy)	endometriosis, unipolar depression	GCST010859	3:49760336
rs13118306-<b>C</b>	4 x 10-8	-	-	[0.015-0.031]	CC2D2A	Endometriosis or depression (pleiotropy)	endometriosis, unipolar depression	GCST010859	4:15476188
rs2134025-<b>A</b>	1 x 10-8	-	-	[0.019-0.038]	LINC02503	Endometriosis or depression (pleiotropy)	endometriosis, unipolar depression	GCST010859	4:104011140
rs12512642-<b>T</b>	5 x 10-8	-	-	[0.018-0.037]	LINC02479	Endometriosis or depression (pleiotropy)	endometriosis, unipolar depression	GCST010859	4:130288732
rs57273516-<b>A</b>	5 x 10-8	-	-	[0.016-0.035]	NICN1, RNA5SP130	Endometriosis or depression (pleiotropy)	endometriosis, unipolar depression	GCST010859	3:49445641
rs13164188-<b>T</b>	9 x 10-9	-	-	[0.016-0.032]	LINC02163, RNU6-334P	Endometriosis or depression (pleiotropy)	endometriosis, unipolar depression	GCST010859	5:104578822
rs4480415-<b>A</b>	5 x 10-8	NR	-	-	RABGAP1L	Endometriosis or asthma (pleiotropy)	asthma, endometriosis	GCST90102598	1:174830983
rs13098877-<b>T</b>	8 x 10-8	NR	-	-	LPP	Endometriosis or asthma (pleiotropy)	asthma, endometriosis	GCST90102598	3:188415375
rs2534685-<b>T</b>	6 x 10-8	NR	-	-	MICB-DT	Endometriosis or asthma (pleiotropy)	asthma, endometriosis	GCST90102598	6:31494468
rs2894221-<b>A</b>	6 x 10-12	NR	-	-	MICB-DT	Endometriosis or asthma (pleiotropy)	asthma, endometriosis	GCST90102598	6:31493994
rs17603933-<b>C</b>	7 x 10-8	NR	-	-	PRAG1, FAM86B3P	Endometriosis or asthma (pleiotropy)	asthma, endometriosis	GCST90102598	8:8310952
rs55852693-<b>A</b>	6 x 10-8	NR	-	-	PRAG1, FAM86B3P	Endometriosis or asthma (pleiotropy)	asthma, endometriosis	GCST90102598	8:8317614
rs2945865-<b>A</b>	7 x 10-8	NR	-	-	RN7SL178P, PRAG1	Endometriosis or asthma (pleiotropy)	asthma, endometriosis	GCST90102598	8:8412181
rs7829975-<b>A</b>	1 x 10-8	NR	-	-	RN7SL178P, CLDN23	Endometriosis or asthma (pleiotropy)	asthma, endometriosis	GCST90102598	8:8690607
rs2945858-<b>T</b>	1 x 10-7	NR	-	-	RN7SL178P, PRAG1	Endometriosis or asthma (pleiotropy)	asthma, endometriosis	GCST90102598	8:8428606
rs399123-<b>T</b>	5 x 10-9	NR	-	-	MFHAS1	Endometriosis or asthma (pleiotropy)	asthma, endometriosis	GCST90102598	8:8890027
rs7825636-<b>A</b>	9 x 10-8	NR	-	-	CLDN23, MFHAS1	Endometriosis or asthma (pleiotropy)	asthma, endometriosis	GCST90102598	8:8720719
rs10099122-<b>T</b>	3 x 10-8	NR	-	-	TNKS	Endometriosis or asthma (pleiotropy)	asthma, endometriosis	GCST90102598	8:9710493
rs572307-<b>T</b>	7 x 10-8	NR	-	-	CLDN23, MFHAS1	Endometriosis or asthma (pleiotropy)	asthma, endometriosis	GCST90102598	8:8721301
rs10109025-<b>C</b>	3 x 10-8	NR	-	-	XKR6	Endometriosis or asthma (pleiotropy)	asthma, endometriosis	GCST90102598	8:10958061
rs693109-<b>A</b>	1 x 10-7	NR	-	-	MFHAS1, CLDN23	Endometriosis or asthma (pleiotropy)	asthma, endometriosis	GCST90102598	8:8782662
rs13250871-<b>A</b>	2 x 10-8	NR	-	-	LINC00208, GATA4	Endometriosis or asthma (pleiotropy)	asthma, endometriosis	GCST90102598	8:11610254
rs12677543-<b>C</b>	7 x 10-8	NR	-	-	MFHAS1	Endometriosis or asthma (pleiotropy)	asthma, endometriosis	GCST90102598	8:8786764
rs12253527-<b>A</b>	8 x 10-11	NR	-	-	MLLT10	Endometriosis or asthma (pleiotropy)	asthma, endometriosis	GCST90102598	10:21530895
rs59046059-<b>A</b>	5 x 10-8	NR	-	-	MFHAS1	Endometriosis or asthma (pleiotropy)	asthma, endometriosis	GCST90102598	8:8813226
rs4841046-<b>T</b>	7 x 10-8	NR	-	-	MFHAS1	Endometriosis or asthma (pleiotropy)	asthma, endometriosis	GCST90102598	8:8815291
rs35039922-<b>A</b>	5 x 10-8	NR	-	-	MFHAS1	Endometriosis or asthma (pleiotropy)	asthma, endometriosis	GCST90102598	8:8817815
rs57312668-<b>A</b>	6 x 10-8	NR	-	-	MFHAS1	Endometriosis or asthma (pleiotropy)	asthma, endometriosis	GCST90102598	8:8822967
rs4841051-<b>T</b>	7 x 10-8	NR	-	-	MFHAS1	Endometriosis or asthma (pleiotropy)	asthma, endometriosis	GCST90102598	8:8828136
rs12156017-<b>C</b>	6 x 10-8	NR	-	-	RNU6-526P, TNKS	Endometriosis or asthma (pleiotropy)	asthma, endometriosis	GCST90102598	8:9549327
rs4075359-<b>T</b>	6 x 10-8	NR	-	-	TNKS	Endometriosis or asthma (pleiotropy)	asthma, endometriosis	GCST90102598	8:9630303
rs1540207-<b>A</b>	9 x 10-8	NR	-	-	RABGAP1L	Endometriosis or asthma (pleiotropy)	asthma, endometriosis	GCST90102598	1:174831734
rs72828033-<b>C</b>	4 x 10-11	NR	-	-	SLC9A2	Endometriosis or asthma (pleiotropy)	asthma, endometriosis	GCST90102598	2:102661403
rs13099273-<b>A</b>	5 x 10-8	NR	-	-	LPP	Endometriosis or asthma (pleiotropy)	asthma, endometriosis	GCST90102598	3:188415730
rs2534687-<b>T</b>	2 x 10-8	NR	-	-	MICB-DT	Endometriosis or asthma (pleiotropy)	asthma, endometriosis	GCST90102598	6:31493831
rs2516408-<b>A</b>	9 x 10-8	NR	-	-	MICB	Endometriosis or asthma (pleiotropy)	asthma, endometriosis	GCST90102598	6:31495714
rs12700186-<b>T</b>	2 x 10-8	NR	-	-	ITGB8	Endometriosis or asthma (pleiotropy)	asthma, endometriosis	GCST90102598	7:20377088
rs2976950-<b>A</b>	1 x 10-7	NR	-	-	PRAG1, RN7SL178P	Endometriosis or asthma (pleiotropy)	asthma, endometriosis	GCST90102598	8:8391572
rs6601697-<b>T</b>	2 x 10-8	NR	-	-	PRAG1, RN7SL178P	Endometriosis or asthma (pleiotropy)	asthma, endometriosis	GCST90102598	8:8412784
rs2921095-<b>T</b>	9 x 10-8	NR	-	-	RN7SL178P, PRAG1	Endometriosis or asthma (pleiotropy)	asthma, endometriosis	GCST90102598	8:8427694
rs2409088-<b>C</b>	1 x 10-8	NR	-	-	MFHAS1	Endometriosis or asthma (pleiotropy)	asthma, endometriosis	GCST90102598	8:8788215
rs2921081-<b>A</b>	6 x 10-8	NR	-	-	PRAG1, RN7SL178P	Endometriosis or asthma (pleiotropy)	asthma, endometriosis	GCST90102598	8:8442426
rs17658270-<b>C</b>	6 x 10-9	NR	-	-	RNU6-526P, RNU6-1151P	Endometriosis or asthma (pleiotropy)	asthma, endometriosis	GCST90102598	8:9296109
rs572366-<b>A</b>	8 x 10-8	NR	-	-	CLDN23, MFHAS1	Endometriosis or asthma (pleiotropy)	asthma, endometriosis	GCST90102598	8:8721284
rs7838378-<b>A</b>	6 x 10-8	NR	-	-	XKR6, PINX1-DT	Endometriosis or asthma (pleiotropy)	asthma, endometriosis	GCST90102598	8:10873556
rs519019-<b>A</b>	5 x 10-8	NR	-	-	CLDN23, MFHAS1	Endometriosis or asthma (pleiotropy)	asthma, endometriosis	GCST90102598	8:8737594
rs12156009-<b>A</b>	4 x 10-8	NR	-	-	FAM167A, FAM167A-AS1	Endometriosis or asthma (pleiotropy)	asthma, endometriosis	GCST90102598	8:11427710
rs2271342-<b>T</b>	1 x 10-7	NR	-	-	MFHAS1	Endometriosis or asthma (pleiotropy)	asthma, endometriosis	GCST90102598	8:8786428
rs72782675-<b>T</b>	3 x 10-8	NR	-	-	LINC02676, LINC00709	Endometriosis or asthma (pleiotropy)	asthma, endometriosis	GCST90102598	10:8986983
rs4841040-<b>T</b>	9 x 10-8	NR	-	-	MFHAS1	Endometriosis or asthma (pleiotropy)	asthma, endometriosis	GCST90102598	8:8797017
rs10893844-<b>C</b>	6 x 10-8	NR	-	-	LINC02098, ETS1	Endometriosis or asthma (pleiotropy)	asthma, endometriosis	GCST90102598	11:128315955
rs56062135-<b>T</b>	7 x 10-22	NR	-	-	SMAD3	Endometriosis or asthma (pleiotropy)	asthma, endometriosis	GCST90102598	15:67163292
rs28360855-<b>A</b>	6 x 10-9	NR	-	-	SMAD3	Endometriosis or asthma (pleiotropy)	asthma, endometriosis	GCST90102598	15:67166467
rs35653192-<b>A</b>	2 x 10-8	NR	-	-	EFTUD2	Endometriosis or asthma (pleiotropy)	asthma, endometriosis	GCST90102598	17:44898335
rs8129889-<b>A</b>	7 x 10-9	NR	-	-	RUNX1	Endometriosis or asthma (pleiotropy)	asthma, endometriosis	GCST90102598	21:35107932
rs8133814-<b>C</b>	3 x 10-9	NR	-	-	RUNX1	Endometriosis or asthma (pleiotropy)	asthma, endometriosis	GCST90102598	21:35320152
rs7006985-<b>A</b>	7 x 10-8	NR	-	-	TNKS	Endometriosis or asthma (pleiotropy)	asthma, endometriosis	GCST90102598	8:9706927
rs877116-<b>T</b>	9 x 10-8	NR	-	-	XKR6, PINX1	Endometriosis or asthma (pleiotropy)	asthma, endometriosis	GCST90102598	8:10855435
rs1367507-<b>A</b>	1 x 10-7	NR	-	-	PINX1-DT, XKR6	Endometriosis or asthma (pleiotropy)	asthma, endometriosis	GCST90102598	8:10873290
rs11250097-<b>T</b>	9 x 10-8	NR	-	-	XKR6	Endometriosis or asthma (pleiotropy)	asthma, endometriosis	GCST90102598	8:10954319
rs11250098-<b>A</b>	1 x 10-7	NR	-	-	XKR6	Endometriosis or asthma (pleiotropy)	asthma, endometriosis	GCST90102598	8:10961097
rs13248109-<b>A</b>	9 x 10-8	NR	-	-	LINC00208, GATA4	Endometriosis or asthma (pleiotropy)	asthma, endometriosis	GCST90102598	8:11605008
rs4840573-<b>A</b>	6 x 10-8	NR	-	-	GATA4, LINC00208	Endometriosis or asthma (pleiotropy)	asthma, endometriosis	GCST90102598	8:11605721
rs7072776-<b>A</b>	6 x 10-8	NR	-	-	DNAJC1, MLLT10	Endometriosis or asthma (pleiotropy)	asthma, endometriosis	GCST90102598	10:21744013
rs10828266-<b>A</b>	7 x 10-8	NR	-	-	DNAJC1	Endometriosis or asthma (pleiotropy)	asthma, endometriosis	GCST90102598	10:21809772
rs2666773-<b>A</b>	6 x 10-8	NR	-	-	DNAJC1	Endometriosis or asthma (pleiotropy)	asthma, endometriosis	GCST90102598	10:21834839
rs4747438-<b>T</b>	8 x 10-8	NR	-	-	DNAJC1	Endometriosis or asthma (pleiotropy)	asthma, endometriosis	GCST90102598	10:21835334
rs792458-<b>T</b>	9 x 10-8	NR	-	-	DNAJC1	Endometriosis or asthma (pleiotropy)	asthma, endometriosis	GCST90102598	10:21844864
rs4748779-<b>T</b>	9 x 10-8	NR	-	-	DNAJC1	Endometriosis or asthma (pleiotropy)	asthma, endometriosis	GCST90102598	10:21999203
rs10893845-<b>T</b>	6 x 10-8	NR	-	-	ETS1, LINC02098	Endometriosis or asthma (pleiotropy)	asthma, endometriosis	GCST90102598	11:128316987
rs2834909-<b>T</b>	5 x 10-8	NR	-	-	RUNX1	Endometriosis or asthma (pleiotropy)	asthma, endometriosis	GCST90102598	21:35322878
rs1022461-<b>A</b>	7 x 10-8	NR	-	-	RUNX1	Endometriosis or asthma (pleiotropy)	asthma, endometriosis	GCST90102598	21:35353673
rs9438873-<b>T</b>	2 x 10-9	NR	-	-	CLIC4, RUNX3	Endometriosis or asthma (pleiotropy)	asthma, endometriosis	GCST90102598	1:24894099
rs10828264-<b>A</b>	2 x 10-8	NR	-	-	MLLT10	Endometriosis or asthma (pleiotropy)	asthma, endometriosis	GCST90102599	10:21728616
rs12412656-<b>A</b>	2 x 10-9	NR	-	-	PTEN, MED6P1	Endometriosis or asthma (pleiotropy)	asthma, endometriosis	GCST90102599	10:88022133
rs1333042-<b>A</b>	1 x 10-9	NR	-	-	CDKN2B-AS1	Endometriosis or asthma (pleiotropy)	asthma, endometriosis	GCST90102599	9:22103814
rs17293632-<b>C</b>	7 x 10-15	NR	-	-	SMAD3	Endometriosis or asthma (pleiotropy)	asthma, endometriosis	GCST90102599	15:67150258
rs10116277-<b>G</b>	3 x 10-8	NR	-	-	-	Endometriosis or asthma (pleiotropy)	asthma, endometriosis	GCST90102599	Mapping not available
rs6475606-<b>C</b>	1 x 10-8	NR	-	-	CDKN2B-AS1	Endometriosis or asthma (pleiotropy)	asthma, endometriosis	GCST90102599	9:22081851
rs1537370-<b>C</b>	4 x 10-8	NR	-	-	CDKN2B-AS1	Endometriosis or asthma (pleiotropy)	asthma, endometriosis	GCST90102599	9:22084311
rs10738607-<b>A</b>	2 x 10-8	NR	-	-	CDKN2B-AS1	Endometriosis or asthma (pleiotropy)	asthma, endometriosis	GCST90102599	9:22088095
rs10757272-<b>C</b>	3 x 10-9	NR	-	-	CDKN2B-AS1	Endometriosis or asthma (pleiotropy)	asthma, endometriosis	GCST90102599	9:22088261
rs1537371-<b>C</b>	2 x 10-8	NR	-	-	CDKN2B-AS1	Endometriosis or asthma (pleiotropy)	asthma, endometriosis	GCST90102599	9:22099569
rs7859727-<b>C</b>	1 x 10-8	NR	-	-	CDKN2B-AS1	Endometriosis or asthma (pleiotropy)	asthma, endometriosis	GCST90102599	9:22102166
rs1537373-<b>T</b>	2 x 10-8	NR	-	-	CDKN2B-AS1	Endometriosis or asthma (pleiotropy)	asthma, endometriosis	GCST90102599	9:22103342
rs1412834-<b>T</b>	2 x 10-8	NR	-	-	CDKN2B-AS1	Endometriosis or asthma (pleiotropy)	asthma, endometriosis	GCST90102599	9:22110132
rs7341786-<b>A</b>	2 x 10-8	NR	-	-	CDKN2B-AS1	Endometriosis or asthma (pleiotropy)	asthma, endometriosis	GCST90102599	9:22112242
rs10511701-<b>T</b>	2 x 10-8	NR	-	-	CDKN2B-AS1	Endometriosis or asthma (pleiotropy)	asthma, endometriosis	GCST90102599	9:22112600
rs2383207-<b>A</b>	4 x 10-8	NR	-	-	CDKN2B-AS1	Endometriosis or asthma (pleiotropy)	asthma, endometriosis	GCST90102599	9:22115960
rs1537374-<b>A</b>	2 x 10-8	NR	-	-	CDKN2B-AS1	Endometriosis or asthma (pleiotropy)	asthma, endometriosis	GCST90102599	9:22116047
rs1537375-<b>T</b>	4 x 10-8	NR	-	-	CDKN2B-AS1	Endometriosis or asthma (pleiotropy)	asthma, endometriosis	GCST90102599	9:22116072
rs744910-<b>G</b>	3 x 10-12	NR	-	-	SMAD3	Endometriosis or asthma (pleiotropy)	asthma, endometriosis	GCST90102599	15:67154447
rs17228058-<b>A</b>	5 x 10-13	NR	-	-	SMAD3	Endometriosis or asthma (pleiotropy)	asthma, endometriosis	GCST90102599	15:67157967
rs12708492-<b>T</b>	2 x 10-11	NR	-	-	SMAD3	Endometriosis or asthma (pleiotropy)	asthma, endometriosis	GCST90102599	15:67175203
rs17294280-<b>A</b>	7 x 10-11	NR	-	-	SMAD3	Endometriosis or asthma (pleiotropy)	asthma, endometriosis	GCST90102599	15:67175947
rs4851536-<b>T</b>	4 x 10-6	NR	-	-	-	Endometriosis or asthma (pleiotropy)	asthma, endometriosis	GCST90102599	Mapping not available
rs1830321-<b>T</b>	1 x 10-6	NR	-	-	TEX41	Endometriosis or asthma (pleiotropy)	asthma, endometriosis	GCST90102599	2:145067988
rs752280-<b>A</b>	6 x 10-6	NR	-	-	RPL5P7, PPIAP66	Endometriosis or asthma (pleiotropy)	asthma, endometriosis	GCST90102599	2:173688707
rs1250240-<b>A</b>	6 x 10-6	NR	-	-	FN1	Endometriosis or asthma (pleiotropy)	asthma, endometriosis	GCST90102599	2:215430291
rs6778350-<b>A</b>	7 x 10-6	NR	-	-	RARB	Endometriosis or asthma (pleiotropy)	asthma, endometriosis	GCST90102599	3:25465539
rs4386465-<b>A</b>	7 x 10-6	NR	-	-	TMPRSS7	Endometriosis or asthma (pleiotropy)	asthma, endometriosis	GCST90102599	3:112036219
rs882551-<b>A</b>	5 x 10-6	NR	-	-	RNA5SP199, KIF4B	Endometriosis or asthma (pleiotropy)	asthma, endometriosis	GCST90102599	5:155636254
rs200215-<b>T</b>	7 x 10-6	NR	-	-	FARS2	Endometriosis or asthma (pleiotropy)	asthma, endometriosis	GCST90102599	6:5479863
rs4722665-<b>A</b>	8 x 10-6	NR	-	-	HOXA7	Endometriosis or asthma (pleiotropy)	asthma, endometriosis	GCST90102599	7:27157700
rs12702220-<b>T</b>	5 x 10-7	NR	-	-	ZNF619P1, HMGN1P19	Endometriosis or asthma (pleiotropy)	asthma, endometriosis	GCST90102599	7:46439588
rs11769224-<b>A</b>	8 x 10-6	NR	-	-	HMGN1P19, ZNF619P1	Endometriosis or asthma (pleiotropy)	asthma, endometriosis	GCST90102599	7:46590756
rs11669442-<b>T</b>	4 x 10-6	NR	-	-	FOXA3	Endometriosis or asthma (pleiotropy)	asthma, endometriosis	GCST90102599	19:45871299
rs6010226-<b>A</b>	9 x 10-6	NR	-	-	PLXNB2	Endometriosis or asthma (pleiotropy)	asthma, endometriosis	GCST90102599	22:50276187
rs2195889-<b>T</b>	5 x 10-6	NR	-	-	HMGN1P19, EPS15P1	Endometriosis or asthma (pleiotropy)	asthma, endometriosis	GCST90102599	7:46644856
rs7837587-<b>T</b>	7 x 10-6	NR	-	-	PRAG1, RN7SL178P	Endometriosis or asthma (pleiotropy)	asthma, endometriosis	GCST90102599	8:8521482
rs1039916-<b>A</b>	7 x 10-6	NR	-	-	MFHAS1	Endometriosis or asthma (pleiotropy)	asthma, endometriosis	GCST90102599	8:8828344
rs1458942-<b>A</b>	3 x 10-6	NR	-	-	RNU6-526P, TNKS	Endometriosis or asthma (pleiotropy)	asthma, endometriosis	GCST90102599	8:9549092
rs10757269-<b>A</b>	6 x 10-8	NR	-	-	CDKN2B-AS1	Endometriosis or asthma (pleiotropy)	asthma, endometriosis	GCST90102599	9:22072265
rs1333045-<b>T</b>	4 x 10-7	NR	-	-	CDKN2B-AS1	Endometriosis or asthma (pleiotropy)	asthma, endometriosis	GCST90102599	9:22119196
rs10739580-<b>T</b>	7 x 10-6	NR	-	-	C5, TRAF1	Endometriosis or asthma (pleiotropy)	asthma, endometriosis	GCST90102599	9:120933004
rs495828-<b>T</b>	2 x 10-7	NR	-	-	ABO, Y_RNA	Endometriosis or asthma (pleiotropy)	asthma, endometriosis	GCST90102599	9:133279294
rs12245880-<b>T</b>	4 x 10-7	NR	-	-	LINC02643, MRM3P1	Endometriosis or asthma (pleiotropy)	asthma, endometriosis	GCST90102599	10:21379270
rs11012737-<b>A</b>	5 x 10-8	NR	-	-	MLLT10	Endometriosis or asthma (pleiotropy)	asthma, endometriosis	GCST90102599	10:21560840
rs11190871-<b>A</b>	4 x 10-6	NR	-	-	NRG3, RPA2P2	Endometriosis or asthma (pleiotropy)	asthma, endometriosis	GCST90102599	10:81666211
rs4933464-<b>T</b>	4 x 10-7	NR	-	-	PTEN, MED6P1	Endometriosis or asthma (pleiotropy)	asthma, endometriosis	GCST90102599	10:88026131
rs4766095-<b>A</b>	2 x 10-6	NR	-	-	LINC02827, TSPAN9	Endometriosis or asthma (pleiotropy)	asthma, endometriosis	GCST90102599	12:3293526
rs12301591-<b>T</b>	8 x 10-6	NR	-	-	ITPR2	Endometriosis or asthma (pleiotropy)	asthma, endometriosis	GCST90102599	12:26440995
rs10878172-<b>A</b>	1 x 10-5	NR	-	-	XPOT	Endometriosis or asthma (pleiotropy)	asthma, endometriosis	GCST90102599	12:64439469
rs7954204-<b>T</b>	5 x 10-6	NR	-	-	HELLPAR	Endometriosis or asthma (pleiotropy)	asthma, endometriosis	GCST90102599	12:102246473
rs9651925-<b>T</b>	1 x 10-7	NR	-	-	LINC02456, IGF1	Endometriosis or asthma (pleiotropy)	asthma, endometriosis	GCST90102599	12:102451766
rs17797222-<b>A</b>	9 x 10-7	NR	-	-	IGF1, LINC00485	Endometriosis or asthma (pleiotropy)	asthma, endometriosis	GCST90102599	12:102520168
rs10773000-<b>T</b>	8 x 10-6	NR	-	-	MTRFR, CDK2AP1	Endometriosis or asthma (pleiotropy)	asthma, endometriosis	GCST90102599	12:123251537
rs17606127-<b>T</b>	1 x 10-6	NR	-	-	LINC00383	Endometriosis or asthma (pleiotropy)	asthma, endometriosis	GCST90102599	13:69314926
rs17228212-<b>T</b>	3 x 10-7	NR	-	-	SMAD3	Endometriosis or asthma (pleiotropy)	asthma, endometriosis	GCST90102599	15:67166301
rs7208926-<b>A</b>	4 x 10-7	NR	-	-	CEP112	Endometriosis or asthma (pleiotropy)	asthma, endometriosis	GCST90102599	17:65867092
rs98229-<b>A</b>	3 x 10-7	NR	-	-	SEPTIN9	Endometriosis or asthma (pleiotropy)	asthma, endometriosis	GCST90102599	17:77370538
rs2341097-<b>T</b>	1 x 10-5	NR	-	-	SIX5	Endometriosis or asthma (pleiotropy)	asthma, endometriosis	GCST90102599	19:45765644
rs7258364-<b>T</b>	3 x 10-6	NR	-	-	SYMPK	Endometriosis or asthma (pleiotropy)	asthma, endometriosis	GCST90102599	19:45853290
