# Supplementary material for: Molecular Mechanisms of Endometriosis Revealed Using Omics Data
Source: Biomedicines. 2023 Aug 7;11(8):2210. doi: 10.3390/biomedicines11082210 (PMC10452455; doi:10.3390/biomedicines11082210)
Supplement: Supplementary file 1 [file biomedicines-11-02210-s001.zip › Supplementary Table S5.xlsx]

## Sheet: gwas.genes.gobp.sig.re
GOBP	Gene	OR	P value		GOBP: gene ontology biological process
GOBP_REGULATION_OF_LOCOMOTION	CDKN2B-AS1;GPNMB;NRG3;PRAG1;ERBB4;ETS1;PLCB1;FN1;PLXNB2;FSHB;CLIC4;FOXP1;GRM5;HOXA7;IGF1;IGF1R;IL1A;IL1B;KDR;SMAD3;WNT4;MAP2K5;CAMK1D;PTEN;RHOJ;BCL2;ROBO2;C5;NRP1;CCN4;IL33	4.26404	2.00441e-10		Gene: common genes between input genes and genes of a gene set
GOBP_LOCOMOTION	CDKN2B-AS1;GPNMB;NRG3;CMTM8;PRAG1;DEFA1;ERBB4;ETS1;ETV1;PLCB1;FN1;PLXNB2;FSHB;CLIC4;FOXP1;GRM5;HOXA7;IGF1;IGF1R;IL1A;IL1B;KDR;SMAD3;WNT4;MAP2K5;CAMK1D;PTEN;RHOJ;BCL2;ROBO2;BSG;C5;NRP1;CCN4;IL33	3.78282	3.46688e-10		OR: odds ratio
GOBP_CELL_ADHESION	LAMC3;GPNMB;COL12A1;COL13A1;CLDN23;ETS1;FN1;CRB1;PLXNB2;NEGR1;HOXA7;IGF1;IL1A;IL1B;ITGB8;KDR;LPP;SMAD3;WNT4;VEZT;MAP2K5;PTEN;PTPRD;BCL2;ROBO2;SPTA1;BSG;SYMPK;RUNX1;SKAP1;RUNX3;PDE5A;NRP1;CCN4;IL32;CDC42	3.65486	4.85221e-10
GOBP_TUBE_MORPHOGENESIS	GPNMB;ESR1;ETS1;FN1;PLXNB2;CLIC4;GATA4;FOXP1;NR3C1;HOXA7;IL1A;IL1B;ITGB8;KDR;SMAD3;MEIS1;PGR;WNT4;MAP2K5;PTEN;RHOJ;CC2D2A;BCL2;BSG;C5;RUNX1;NRP1	4.41021	1.27216e-09
GOBP_TUBE_DEVELOPMENT	GPNMB;ESR1;ETS1;FN1;PLXNB2;CLIC4;GATA4;FOXP1;NR3C1;HOXA7;IL1A;IL1B;ITGB8;KDR;SMAD3;MEIS1;PGR;WNT4;MAP2K5;PTEN;RHOJ;CC2D2A;RARB;BCL2;ROBO2;BSG;C5;RUNX1;NRP1;CDC42	4.01759	1.3981e-09
GOBP_REGULATION_OF_MULTICELLULAR_ORGANISMAL_DEVELOPMENT	GPNMB;RFLNA;ERBB4;ETS1;PLCB1;FN1;PLXNB2;FSHB;GATA4;FOXP1;GRM5;HOXA7;IGF1;IL1A;IL1B;ITGB8;KDR;SMAD3;MEIS1;WNT4;PTEN;RHOJ;PTPRD;RARB;ROBO2;C5;CDC73;AXIN2;RUNX1;RUNX3;NRP1;CCN4;IL33;SEPTIN7	3.59752	1.96569e-09
GOBP_REGULATION_OF_CELL_DIFFERENTIATION	RFLNA;DDX6;ETS1;PLCB1;FN1;PLXNB2;FSHB;NEPRO;TSKU;GATA4;FOXP1;GRM5;HOXA7;IGF1;IL1A;IL1B;KDR;SMAD3;MEIS1;WNT4;MAPK9;PTEN;PTPRD;RARB;BCL2;ROBO2;CDC73;ST7;AXIN2;RUNX1;RUNX3;PDE5A;NRP1;CCN4;IL33;CDC42	3.42323	2.47792e-09
GOBP_CIRCULATORY_SYSTEM_DEVELOPMENT	GPNMB;ERBB4;ETS1;FN1;CLIC4;GATA4;FOXP1;HOXA7;IGF1;IGF1R;IL1A;IL1B;ITGB8;KDR;SMAD3;MEIS1;PLCE1;WNT4;MAP2K5;PTEN;RHOJ;CC2D2A;RARB;ROBO2;BSG;C5;AXIN2;RUNX1;NRP1;CDC42	3.82213	4.13061e-09
GOBP_POSITIVE_REGULATION_OF_MAPK_CASCADE	GPNMB;ERBB4;PLCB1;GATA4;GRM5;IGF1;IGF1R;IL1A;IL1B;KDR;MAP3K4;PLCE1;MAP2K5;PTEN;TRAF1;PDE5A;NRP1;MFHAS1;CDC42	5.83644	4.25737e-09
GOBP_CENTRAL_NERVOUS_SYSTEM_DEVELOPMENT	LAMC3;NRG3;PPP1R17;MACROD2;ERBB4;PLCB1;PLXNB2;NEGR1;TSKU;FOXP1;GRIN2D;IGF1R;IL1B;MEIS1;WNT4;PTEN;RARB;BCL2;ROBO2;CHST8;TFAP2D;AGBL4;NRP1;SYNJ2;IL33;FOXP2;CDC42	3.90819	1.42245e-08
GOBP_MAPK_CASCADE	GPNMB;ERBB4;PLCB1;FN1;GATA4;GRM5;IGF1;IGF1R;IL1A;IL1B;KDR;SMAD3;MAP3K1;MAP3K4;PLCE1;MAPK9;MAP2K5;PTEN;TRAF1;PDE5A;NRP1;MFHAS1;CDC42	4.40889	1.85401e-08
GOBP_ANATOMICAL_STRUCTURE_FORMATION_INVOLVED_IN_MORPHOGENESIS	GPNMB;NRG3;COL12A1;ETS1;FN1;CRB1;PLXNB2;CLIC4;GATA4;HOXA7;IL1A;IL1B;ITGB8;KDR;SMAD3;MEIS1;ATP8B1;WNT4;MAP2K5;PTEN;RHOJ;CC2D2A;ROBO2;BSG;C5;CDC73;AXIN2;RUNX1;NRP1	3.57824	2.7916e-08
GOBP_CELL_CELL_ADHESION	GPNMB;COL13A1;CLDN23;ETS1;FN1;CRB1;PLXNB2;NEGR1;IGF1;IL1A;IL1B;LPP;WNT4;VEZT;MAP2K5;PTEN;PTPRD;BCL2;ROBO2;SPTA1;BSG;RUNX1;SKAP1;RUNX3;PDE5A	3.97927	3.26047e-08
GOBP_POSITIVE_REGULATION_OF_CELLULAR_COMPONENT_ORGANIZATION	SEPTIN9;ESR1;PLCB1;FN1;PLXNB2;NEGR1;IGF1;IGF1R;IL1A;IL1B;KDR;SMAD3;MAP3K4;PLCE1;WNT4;MAPK9;CAMK1D;PTPRD;ROBO2;MOAP1;RUNX1;SKAP1;TNKS;NRP1;SEPTIN7;CDC42	3.77644	4.83338e-08
GOBP_REGULATION_OF_IMMUNE_SYSTEM_PROCESS	GPNMB;DENND1B;ESR1;ETS1;PLCB1;FN1;FSHB;FOXP1;HOXA7;IGF1;IL1A;IL1B;SMAD3;MEIS1;MAP3K1;MICB;MAPK9;CAMK1D;PTEN;PTPRD;BCL2;SPTA1;C2;C5;CDC73;TLR10;RUNX1;SKAP1;RUNX3;PDE5A;IL33;MFHAS1	3.23967	5.37837e-08
GOBP_REGULATION_OF_CELL_POPULATION_PROLIFERATION	GPNMB;SIX5;ERBB4;ESR1;ETS1;FN1;SH3BP4;FSHB;FOXP1;IGF1;IGF1R;IL1A;IL1B;KDR;SMAD3;MEIS1;PGR;PINX1;MAP2K5;PTEN;RARB;BCL2;SPTA1;KLF9;CDC73;AXIN2;TFAP2D;AGBL4;RUNX1;RUNX3;PDE5A;NRP1;CCN4;IL33;CDC42	3.0353	6.51387e-08
GOBP_CELL_MOTILITY	CDKN2B-AS1;LAMC3;GPNMB;NRG3;PRAG1;DEFA1;ERBB4;ETS1;GPC5;PLCB1;FN1;PLXNB2;FSHB;CLIC4;FOXP1;HOXA7;IGF1;IGF1R;IL1A;IL1B;ITGB8;KDR;SMAD3;WNT4;MAP2K5;CAMK1D;PTEN;RHOJ;BCL2;BSG;C5;NRP1;CCN4;IL33;CDC42	3.01009	7.86616e-08
GOBP_POSITIVE_REGULATION_OF_TRANSCRIPTION_BY_RNA_POLYMERASE_II	ARID3B;SIX5;ESR1;ETS1;ETV1;ETV6;ZNF438;FSHB;GATA4;NR3C1;FOXA3;HOXA7;IGF1;IL1A;IL1B;SMAD3;MEIS1;PGR;MAP2K5;RARB;CDC73;MLLT10;TFAP2D;RUNX1;SKAP1;TNKS;IL33;FHL5	3.46312	8.83882e-08
GOBP_HEART_DEVELOPMENT	ERBB4;FN1;GATA4;FOXP1;IGF1;IGF1R;IL1A;KDR;SMAD3;PLCE1;MAP2K5;PTEN;CC2D2A;RARB;ROBO2;AXIN2;RUNX1;NRP1;CDC42	4.73395	9.98129e-08
GOBP_NEUROGENESIS	LAMC3;NRG3;PRAG1;DDX6;ERBB4;ETV1;ETV6;FN1;CRB1;PLXNB2;NEGR1;NEPRO;TSKU;GRM5;GRM7;IGF1R;IL1B;MEIS1;ATP8B1;WNT4;CAMK1D;PTEN;PTPRD;RARB;BCL2;ROBO2;BSG;AGBL4;RUNX1;RUNX3;NRP1;IL33;CDC42	3.03658	1.42106e-07
GOBP_POSITIVE_REGULATION_OF_SIGNALING	GPNMB;PRAG1;ERBB4;GPC5;PLCB1;FN1;NEPRO;GATA4;FOXP1;GRIK2;GRIN2D;GRM5;IGF1;IGF1R;IL1A;IL1B;KDR;SMAD3;MAP3K4;PLCE1;MAPK9;MAP2K5;SLC44A2;PTEN;ROBO2;TRAF1;CDC73;PDE5A;TNKS;NRP1;CCN4;MFHAS1;LY86;CDC42	2.97512	1.49834e-07
GOBP_REGULATION_OF_ANATOMICAL_STRUCTURE_MORPHOGENESIS	GPNMB;PRAG1;ESR1;ETS1;FN1;PLXNB2;GATA4;FOXP1;IL1A;IL1B;ITGB8;KDR;WNT4;FGD6;PTEN;RHOJ;PTPRD;ROBO2;SPTA1;C5;RUNX1;NRP1;SEPTIN7;CDC42	3.68584	2.24433e-07
GOBP_POSITIVE_REGULATION_OF_CELL_DIFFERENTIATION	ETS1;PLCB1;FN1;PLXNB2;GATA4;GRM5;IGF1;IL1B;KDR;SMAD3;WNT4;MAPK9;PTPRD;BCL2;ROBO2;AXIN2;RUNX1;RUNX3;PDE5A;NRP1;CCN4;IL33;CDC42	3.8059	2.27537e-07
GOBP_REGULATION_OF_CELL_DEVELOPMENT	RFLNA;PLCB1;FN1;PLXNB2;GRM5;IGF1;IL1A;IL1B;PTEN;PTPRD;BCL2;ROBO2;AXIN2;PDE5A;NRP1;IL33;CDC42	4.97574	2.27852e-07
GOBP_NEGATIVE_REGULATION_OF_CELL_DIFFERENTIATION	RFLNA;DDX6;NEPRO;TSKU;FOXP1;HOXA7;IGF1;IL1A;IL1B;SMAD3;MEIS1;WNT4;PTEN;RARB;CDC73;AXIN2;RUNX1;RUNX3;NRP1;CCN4	4.22131	2.7435e-07
GOBP_POSITIVE_REGULATION_OF_MACROMOLECULE_BIOSYNTHETIC_PROCESS	ARID3B;SIX5;ERBB4;ESR1;ETS1;ETV1;ETV6;ZNF438;PLCB1;PLXNB2;FSHB;GATA4;NR3C1;FOXA3;HOXA7;IGF1;IL1A;IL1B;KDR;SMAD3;MEIS1;MAP3K4;PGR;WNT4;MAP2K5;RARB;CDC73;MLLT10;TFAP2D;RUNX1;SKAP1;RUNX3;TNKS;IL33;FHL5	2.81572	3.46134e-07
GOBP_REGULATION_OF_CELL_ADHESION	GPNMB;ETS1;FN1;PLXNB2;HOXA7;IGF1;IL1A;IL1B;KDR;SMAD3;WNT4;MAP2K5;PTEN;BCL2;SPTA1;RUNX1;SKAP1;RUNX3;PDE5A;NRP1;CDC42	3.94559	4.10587e-07
GOBP_MESENCHYME_DEVELOPMENT	ERBB4;FN1;GATA4;IGF1;IL1B;SMAD3;WNT4;PTEN;BCL2;ROBO2;AXIN2;NRP1;CDC42	6.25122	4.93561e-07
GOBP_HEAD_DEVELOPMENT	NRG3;MACROD2;ERBB4;PLCB1;PLXNB2;NEGR1;TSKU;FOXP1;GRIN2D;IGF1R;MEIS1;WNT4;PTEN;RARB;BCL2;ROBO2;TFAP2D;NRP1;SYNJ2;FOXP2;CDC42	3.89494	5.01044e-07
GOBP_CELL_JUNCTION_ASSEMBLY	CLDN23;ERBB4;FN1;PLXNB2;NEGR1;IL1B;KDR;SMAD3;WNT4;PTEN;PTPRD;BCL2;ROBO2;NRP1;CDC42	5.24071	5.9602e-07
GOBP_EXTRINSIC_APOPTOTIC_SIGNALING_PATHWAY	IGF1;IL1A;IL1B;SMAD3;MAP2K5;PTEN;BCL2;MOAP1;TRAF1;NRP1;IL33	7.44003	7.16305e-07
GOBP_ANIMAL_ORGAN_MORPHOGENESIS	LAMC3;NRG3;COL13A1;RFLNA;ERBB4;ESR1;CRB1;TSKU;GATA4;NR3C1;HOXA7;KDR;SMAD3;MEIS1;PGR;WNT4;PTEN;RARB;BCL2;ROBO2;BSG;AXIN2;NRP1;CDC42	3.44048	7.20054e-07
GOBP_ORGAN_GROWTH	ERBB4;ESR1;TSKU;GATA4;FOXP1;IGF1;PTEN;RARB;BCL2;RUNX1	8.45361	7.52341e-07
GOBP_BLOOD_VESSEL_MORPHOGENESIS	GPNMB;ETS1;FN1;CLIC4;GATA4;HOXA7;IL1A;IL1B;ITGB8;KDR;MEIS1;WNT4;MAP2K5;PTEN;RHOJ;BSG;C5;RUNX1;NRP1	4.07368	8.75061e-07
GOBP_POSITIVE_REGULATION_OF_DEVELOPMENTAL_PROCESS	ERBB4;ETS1;PLCB1;FN1;PLXNB2;GATA4;GRM5;IGF1;IGF1R;IL1A;IL1B;ITGB8;KDR;SMAD3;WNT4;MAPK9;PTPRD;BCL2;ROBO2;C5;AXIN2;RUNX1;RUNX3;PDE5A;NRP1;CCN4;IL33;CDC42	3.06224	9.09343e-07
GOBP_TISSUE_DEVELOPMENT	LAMC3;COL12A1;RFLNA;ERBB4;ESR1;PLCB1;FN1;PLXNB2;CLIC4;TSKU;GATA4;FOXP1;NR3C1;HOXA7;IGF1;IL1A;IL1B;ITGB8;KDR;SMAD3;PGR;WNT4;PTEN;CC2D2A;RARB;BCL2;ROBO2;BSG;CDC73;AXIN2;RUNX1;RUNX3;NRP1;CCN4;CDC42	2.68504	9.62882e-07
GOBP_GROWTH	NRG3;ERBB4;ESR1;PLCB1;FN1;SH3BP4;CLIC4;TSKU;GATA4;FOXP1;EYS;IGF1;SMAD3;PLCE1;MAP2K5;PTEN;RARB;BCL2;CDC73;RUNX1;NRP1;CDC42	3.59436	9.9193e-07
GOBP_EPITHELIAL_TUBE_MORPHOGENESIS	ESR1;PLXNB2;CLIC4;GATA4;FOXP1;NR3C1;KDR;SMAD3;PGR;WNT4;CC2D2A;BCL2;NRP1	5.84072	1.01902e-06
GOBP_POSITIVE_REGULATION_OF_RNA_METABOLIC_PROCESS	ARID3B;SIX5;ERBB4;ESR1;ETS1;ETV1;ETV6;ZNF438;PLCB1;FSHB;GATA4;NR3C1;FOXA3;HOXA7;IGF1;IL1A;IL1B;SMAD3;MEIS1;PGR;POLR2A;WNT4;MAP2K5;RARB;CDC73;MLLT10;TFAP2D;RUNX1;SKAP1;RUNX3;TNKS;IL33;FHL5	2.74403	1.18225e-06
GOBP_DEVELOPMENT_OF_PRIMARY_FEMALE_SEXUAL_CHARACTERISTICS	ESR1;FSHB;KDR;PGR;WNT4;BCL2;ROBO2;DMRTA1	11.3247	1.21835e-06
GOBP_NEGATIVE_REGULATION_OF_MULTICELLULAR_ORGANISMAL_PROCESS	GPNMB;ARHGAP42;RFLNA;FN1;TSKU;FOXP1;HOXA7;IGF1;IL1B;MIR148A;SMAD3;WNT4;MAP2K5;PTEN;RARB;BCL2;ROBO2;AXIN2;RUNX1;RUNX3;PDE5A;NRP1;CCN4;IL33;IP6K1	3.23252	1.27941e-06
GOBP_CELL_MATRIX_ADHESION	COL13A1;FN1;HOXA7;ITGB8;KDR;SMAD3;WNT4;PTEN;BCL2;SKAP1;NRP1	6.98001	1.29739e-06
GOBP_MORPHOGENESIS_OF_AN_EPITHELIUM	ERBB4;ESR1;PLXNB2;CLIC4;GATA4;FOXP1;NR3C1;KDR;SMAD3;PGR;WNT4;PTEN;CC2D2A;BCL2;NRP1;CDC42	4.58395	1.39623e-06
GOBP_POSITIVE_REGULATION_OF_MOLECULAR_FUNCTION	TRDN;NRG3;ARHGAP42;DENND1B;ERBB4;ESR1;FN1;RASGEF1C;GRM5;IGF1;IGF1R;IL1B;KDR;SMAD3;MARK3;MAP3K4;WNT4;PINX1;MAP2K5;CAMK1D;PTEN;BCL2;SPTA1;TRAF1;AXIN2;PDE5A;TNKS;NRP1;RABGAP1L;CDC42	2.86713	1.43254e-06
GOBP_CHONDROCYTE_DIFFERENTIATION	RFLNA;TSKU;SMAD3;RARB;AXIN2;RUNX1;RUNX3;CCN4	10.7918	1.71157e-06
GOBP_GLUTAMATE_RECEPTOR_SIGNALING_PATHWAY	PLCB1;GRIK2;GRIK3;GRIN2D;GRM5;GRM7	18.5531	1.90538e-06
GOBP_POSITIVE_REGULATION_OF_LOCOMOTION	CDKN2B-AS1;GPNMB;ETS1;FN1;FSHB;FOXP1;IGF1;IGF1R;IL1A;IL1B;KDR;SMAD3;CAMK1D;RHOJ;BCL2;NRP1;CCN4	4.19941	2.10364e-06
GOBP_VASCULATURE_DEVELOPMENT	GPNMB;ETS1;FN1;CLIC4;GATA4;HOXA7;IL1A;IL1B;ITGB8;KDR;MEIS1;WNT4;MAP2K5;PTEN;RHOJ;ROBO2;BSG;C5;RUNX1;NRP1	3.66855	2.16481e-06
GOBP_MESENCHYMAL_CELL_DIFFERENTIATION	ERBB4;FN1;IGF1;IL1B;SMAD3;WNT4;PTEN;BCL2;AXIN2;NRP1;CDC42	6.5166	2.43706e-06
GOBP_POSITIVE_REGULATION_OF_MULTICELLULAR_ORGANISMAL_PROCESS	DENND1B;ERBB4;ETS1;PLCB1;FN1;PLXNB2;TSKU;GATA4;FOXP1;KSR2;GRM5;IGF1;IGF1R;IL1A;IL1B;ITGB8;KDR;SMAD3;WNT4;PTPRD;BCL2;ROBO2;C5;AXIN2;RUNX1;RUNX3;PDE5A;NRP1;IL33	2.82736	2.68021e-06
GOBP_CELL_SUBSTRATE_ADHESION	LAMC3;COL13A1;FN1;HOXA7;ITGB8;KDR;SMAD3;WNT4;PTEN;BCL2;SKAP1;NRP1;CDC42	5.27946	2.95321e-06
GOBP_FEMALE_SEX_DIFFERENTIATION	ESR1;FSHB;KDR;PGR;WNT4;BCL2;ROBO2;DMRTA1	9.85705	3.22008e-06
GOBP_REGULATION_OF_CELL_MATRIX_ADHESION	HOXA7;KDR;SMAD3;WNT4;PTEN;BCL2;SKAP1;NRP1	9.77181	3.41923e-06
GOBP_NEGATIVE_REGULATION_OF_DEVELOPMENTAL_PROCESS	RFLNA;DDX6;NEPRO;TSKU;FOXP1;HOXA7;IGF1;IL1A;IL1B;SMAD3;MEIS1;WNT4;PTEN;RARB;BCL2;ROBO2;CDC73;AXIN2;RUNX1;RUNX3;NRP1;CCN4	3.30899	3.55187e-06
GOBP_TISSUE_MORPHOGENESIS	ERBB4;ESR1;PLXNB2;CLIC4;GATA4;FOXP1;NR3C1;KDR;SMAD3;PGR;WNT4;PTEN;CC2D2A;BCL2;ROBO2;NRP1;CDC42	4.00006	3.9083e-06
GOBP_POSITIVE_REGULATION_OF_INTRACELLULAR_SIGNAL_TRANSDUCTION	GPNMB;PRAG1;ERBB4;PLCB1;FN1;GATA4;GRM5;IGF1;IGF1R;IL1A;IL1B;KDR;MAP3K4;PLCE1;MAP2K5;SLC44A2;PTEN;TRAF1;PDE5A;NRP1;MFHAS1;CDC42	3.26115	4.42658e-06
GOBP_POSITIVE_REGULATION_OF_ORGANELLE_ORGANIZATION	SEPTIN9;PLCB1;IGF1;IL1A;IL1B;KDR;SMAD3;MAP3K4;WNT4;MAPK9;MOAP1;TNKS;NRP1;SEPTIN7;CDC42	4.40525	4.57773e-06
GOBP_NEGATIVE_REGULATION_OF_CELL_POPULATION_PROLIFERATION	GPNMB;SIX5;ERBB4;ETS1;SH3BP4;IL1A;IL1B;SMAD3;PINX1;PTEN;RARB;BCL2;KLF9;CDC73;AXIN2;AGBL4;RUNX3;PDE5A;IL33	3.59616	4.93104e-06
GOBP_REGULATION_OF_CELL_SUBSTRATE_ADHESION	FN1;HOXA7;KDR;SMAD3;WNT4;PTEN;BCL2;SKAP1;NRP1;CDC42	6.77192	4.95179e-06
GOBP_GENERATION_OF_NEURONS	NRG3;PRAG1;DDX6;ERBB4;ETV1;FN1;CRB1;PLXNB2;NEGR1;NEPRO;TSKU;GRM7;IGF1R;MEIS1;ATP8B1;WNT4;CAMK1D;PTEN;PTPRD;BCL2;ROBO2;BSG;AGBL4;RUNX1;RUNX3;NRP1;CDC42	2.80375	6.41056e-06
