# Supplementary material for: Molecular Mechanisms of Endometriosis Revealed Using Omics Data
Source: Biomedicines. 2023 Aug 7;11(8):2210. doi: 10.3390/biomedicines11082210 (PMC10452455; doi:10.3390/biomedicines11082210)
Supplement: Supplementary file 1 [file biomedicines-11-02210-s001.zip › Supplementary Table S6.xlsx]

## Sheet: endometriosis_expression_GEO
PMID	Number of samples
12810542	15
16210010	24
17510236	37
17640886	20
19864316	14
20068008	20
22521153	14
22556377	49
23006437	18
24992181	12
25243856	148
27475412	16
29357938	16
30081718	48
36369952	72
