# Supplementary material for: Molecular Mechanisms of Endometriosis Revealed Using Omics Data
Source: Biomedicines. 2023 Aug 7;11(8):2210. doi: 10.3390/biomedicines11082210 (PMC10452455; doi:10.3390/biomedicines11082210)
Supplement: Supplementary file 1 [file biomedicines-11-02210-s001.zip › Supplementary Table S7.xlsx]

## Sheet: Supplementary Table 7
Genes from endometriosis transcriptomes data
ABCB11
ANK3
C4BPA
C7
CA1
CELF1
CLDN10
DHRS3
DNAJB4
DUX1
ECM1
FBLN2
GLRB
GPRC5A
HSF1
ITGA3
LAMC2
LIPT1
MALL
MAPK8
MERTK
MPPED2
NCR1
NFKBIL1
NPHP1
OFD1
OTC
PAK3
PIGK
PLAAT3
PLEC
POU3F4
RAB9BP1
RIN1
SCG2
SCO2
SELL
SEMA3C
SERPINA5
SERPINB8
SLC22A4
TCN1
TLE3
TYMP
VCAN
VDAC1P1
ZIC2
APEX1
ATF4
BRCA2
CASP8
CCNK
CLCN5
CTNNA1
DYNLL1
GUCY1A2
GUCY1B2
HDAC1
HIF1A
HSPB1
IL2RA
KCNA4
KSR1
MAP3K8
MLH1
MST1R
PDGFRB
PSMB1
ROBO2
SLC9A1
SLC22A1
SOS1
WFDC2
GZMA
HLA-DOB
KRT8
MUC1
PIP5K1B
PLA2G4A
PTPRR
RBP4
S100A1
S100A8
S100A9
SLC15A2
APOE
BST1
C1QA
C1QB
C2
C3
CCL2
CCL3
CCR1
CD2
CD14
CD163
CXCL2
DPP4
FN1
FOS
HLA-DQB1
HLA-DRA
HLA-DRB1
ICAM1
IER3
IGHM
IL4R
IL6
IL7R
INHBA
ITGA5
KLF2
LY96
MAF
NFIL3
PIGR
PLA2G2A
PLSCR1
PNOC
PPARG
PROS1
PTX3
SERPINA3
SOD2
THBS1
THBS2
TNFSF13B
TNFSF14
VCAM1
BUB1B
CCNA2
CCNB1
CCND2
CCNE2
CDK1
CDK2
CDK4
CDK6
CDKN2A
CDKN2C
CDKN3
E2F3
MCM2
MCM4
PLK1
SKP2
ABCA6
ABCA8
ABCA9
ABCC9
AK5
ALDH1A1
ALDH1A2
ANGPT2
ARHGDIB
ATP1B1
BDKRB1
BMP3
CCL8
CD68
CDH13
CGA
CHI3L1
CHRM2
CLIC2
COL15A1
CST1
CXCL12
DKK1
DOCK9
DSC3
EDNRA
EDNRB
EFNB2
EMILIN2
ENPEP
ENPP1
ENPP2
ERAP2
FGF7
FST
GADD45G
GNG11
HEY1
HGF
HSD11B1
HSD17B2
IGFBP1
IGFBP2
IGFBP3
IL1B
IL1R1
IL11
IL13RA2
IL24
IL33
ITGA4
KCNMB4
KLHL23
KYNU
LIF
LTBP1
MFAP4
MMP8
MXRA5
MYC
MYCN
NOG
NOX4
NR4A2
OLFML1
PDE8B
PDGFRL
PEG10
POSTN
PRL
PSG4
PTGES
PTGS2
PTHLH
RDH10
REN
ROR2
RXFP1
SFRP1
SLC7A8
SLIT2
SNCA
SST
TFPI2
THSD7A
TLR4
TMEM154
TNFAIP3
TNFAIP6
TNFSF15
TWIST1
AKR1A1
AKR1C1
AKR1C2
AKR1C3
AKR7A2
ESR1
ESR2
HPGD
HSD11B2
NR1H4
NR2F2
NR2F6
NR3C1
NR3C2
NR4A1
NR4A3
NR0B1
PLA2G5
PLA2G12A
PTGER2
PTGER3
PTGER4
RORB
THRB
ABCG1
ABO
ACSL3
ALDH1A3
ARL4D
ATP1A1
ATP2B2
ATP7B
ATP12A
B4GALT4
BAG5
BANK1
BDH1
BST2
BVES
C1orf21
C1QTNF6
CASZ1
CCDC80
CCL5
CCL21
CD74
CD274
CDH2
CDS1
CERKL
CFI
CHST4
CHST11
CNDP2
CNKSR3
CNTN1
CNTN4
CPB2
CRABP2
CRISP3
CTAGE4
DENND2C
DLGAP1
DNAJB13
DNAJC15
DOCK4
DOCK5
DOK5
DUSP7
EAF2
ECHS1
EDIL3
EGR1
ENG
EPB41L4B
ERN2
FAIM
FETUB
FGD4
FOLR1
FRY
FXYD4
FZD5
GCNT3
GGCT
GJB6
GLIPR1
GLYATL2
GMNN
GPR37
GPR174
GRHL1
GRHL2
HMGCS2
HOOK1
HPRT1
HSPA4L
IFI44
IFI44L
IFIT1
IKZF2
IL2RB
IL2RG
IL32
ILDR1
IRS1
ITGB8
KAT2B
KCNG1
KHDRBS3
KIR3DL2
L3MBTL4
LAMA4
LGALS9
LLGL2
LNX2
LONRF3
LPCAT3
LRFN5
LRP4
LRRC26
MAOA
MARK1
MCCC1
MCCC2
MFAP5
MFSD6
MGST1
MLLT11
MMD
MME
MPHOSPH10
MPZL2
MRPL3
MSX1
MT1E
MT1F
MT1G
MT1H
MT1JP
MT1X
MX1
MX2
MYO5C
NEK10
NKG7
NOSTRIN
OAS2
OAS3
OR1J2
PCSK6
PDGFD
PDZD2
PHYHIPL
PKP2
PLA2G10
PLCH1
PLLP
PLXDC1
PLXNC1
PMAIP1
PMM1
POPDC3
PPP2R3A
PRKAR2B
PSAT1
PSPH
PTGS1
PTH2R
PTPN3
RAB4A
RAMP2
RASL11B
RASSF4
RASSF6
RHOBTB3
RHOU
RNASET2
RNF125
ROS1
SCGB2A2
SCUBE1
SEC14L1
SERPING1
SGK1
SIAE
SIDT1
SLC3A1
SLC5A1
SLC7A1
SLC16A1
SLC39A14
SLC47A1
SNORD116-21
SNX30
ST3GAL6
ST6GAL2
STEAP4
STRBP
SYT2
SYT10
TAGLN
TLCD1
TLR5
TM4SF4
TMED6
TMEM215
TNFRSF21
TNFSF10
TOB1
TRIB2
WNT2
XDH
ZCCHC12
ABCC13
ABHD12B
ABI3BP
ACBD3
ACO1
ACOT4
ACSS2
ADAM6
ADAM10
ADCY2
ADCY5
ADCYAP1
ADORA1
ADPGK
ADPRHL1
ADRB3
AFG3L2
AFMID
AGBL3
AKAP14
AKR1E2
AKT3
ALAS1
ALDH1L2
ALG10B
AMIGO1
AMPH
ANAPC11
ANGPT4
ANGPTL5
ANKRD12
ANTXR1
AP1B1
AP4B1
APCS
APIP
APOBEC2
APOL2
APOOL
AQP9
ARAF
ARHGAP26
ARHGEF2
ARHGEF9
ARHGEF15
ARID1A
ARL5B
ARL13B
ARMC8
ASB4
ASH1L
ASXL3
ATE1
ATF3
ATG10
ATP2B3
ATP8A1
ATP11C
ATRNL1
B3GNT4
B4GALNT3
BAMBI
BAP1
BCAM
BCHE
BCLAF1
BCR
BEST3
BMPR2
BNC2
BRWD3
C1orf198
C1QTNF3
C2orf49
C2orf88
C3orf33
C3orf38
C10orf53
C17orf67
C22orf15
CAB39
CACNA1C
CACNB2
CAD
CALCOCO1
CALCOCO2
CAMTA2
CAPN10
CBLL1
CBLN1
CCBE1
CCDC68
CCDC88C
CCDC93
CCDC150
CCDC159
CCKAR
CCNF
CCNT2
CCT6A
CD200R1
CDC42EP4
CDCA3
CDCA4
CDH5
CDH6
CDK18
CDKL1
CDX4
CDYL
CENPV
CEP120
CEP192
CERCAM
CFHR5
CHD3
CHEK1
CIB2
CIITA
CLASP2
CLEC3A
CLIP2
CLOCK
CMIP
CMKLR1
CNNM2
CNOT3
COBL
COCH
COLEC11
COX6B1
COX6B2
CPSF2
CREB1
CREB5
CREBL2
CROCC
CSAG2
CSNK1G1
CSNK1G3
CSPP1
CSRNP1
CSTF3
CTAGE1
CTBS
CTSE
CUZD1
CYP3A43
DAGLB
DAOA
DBX2
DCDC1
DCK
DCLK1
DCTN5
DDAH2
DDX19A
DDX60
DEPDC7
DHRS7B
DHX33
DLK2
DMRT3
DMRTB1
DMXL2
DNAH7
DOC2B
DOK7
DSCAM
DSCR10
DUSP19
DYM
DYNC2H1
EAF1
EBF1
EBF3
EEF1G
EFCAB6
EFNA5
EIF3K
EIF5
ELP4
EML1
EPC1
EPHA4
EPHB6
EPM2AIP1
EPS15
ERBB3
ESRRG
ETNK2
EVC2
EXD2
EXD3
EXOSC6
EXTL1
EYA2
F13A1
FABP3
FAM25A
FAM93B
FAM120B
FAM131B
FAM193B
FBXL12
FBXO4
FBXO9
FBXO11
FBXO45
FBXW10
FCN1
FFAR2
FGF11
FIGN
FLOT1
FLRT3
FLYWCH1
FLYWCH2
FMO3
FOXO3
FOXP2
FTL
FUT3
GAB1
GABBR1
GABPB2
GABRD
GALNT4
GJB3
GJC3
GK5
GKAP1
GLA
GLI4
GM2A
GNA14
GNPTAB
GNRHR2
GOLGA8A
GON4L
GOT2
GPA33
GPM6A
GPR35
GPR65
GPX7
GREB1L
GRXCR1
GTF2H5
GTSF1L
GUCY2C
GYG2
HAUS5
HAUS6
HIF1AN
HKDC1
HLA-C
HLA-DRB6
HMGN2
HOMER2
HOXA4
HOXD13
HPCA
HSD3B7
HSPB6
HSPB7
HSPB9
HTR1A
IFT80
IGSF11
IL10RA
IL20RB
INHBB
INPP5E
INTS2
INTS5
INTU
IP6K1
IQSEC1
IRGC
ITFG2
ITGA2
ITGA9
ITGAV
ITGB1
ITPRIPL1
IVL
IYD
JAM3
KANK2
KCMF1
KCNA3
KCNH2
KCNK12
KCTD15
KIAA1143
KIAA1586
KIAA1614
KIAA2026
KIF13A
KLF7
KLHDC3
KLHL4
KLHL8
KLHL15
KLHL18
KLK2
KRT222
KRTAP4-7
L1TD1
LAMC1
LATS1
LCE1A
LGI4
LNPEP
LONP2
LONRF1
LPAR3
LPL
LRRC3
LRRC4
LRRC25
LRRC38
LTA4H
LY6G5B
LYRM7
MAFF
MAGEA10
MAGEE1
MAGT1
MAN2C1
MANEA
MAP3K3
MAPK8IP3
MAS1
MBOAT2
MCAT
MCF2L
MCM7
MDH1B
MED13L
MED17
MED22
MED23
METTL9
MINPP1
MKI67
MLF1
MLYCD
MMRN2
MNX1
MPP1
MRPL35
MSL1
MSN
MSX2
MT1L
MTMR8
MVP
MYH14
MYO15A
MYO16
NAB2
NANOG
NANOS1
NAV3
NBN
NDEL1
NDST2
NDUFA3
NECAB1
NEK3
NFE2L3
NFIB
NGFR
NHLRC2
NHS
NIN
NKTR
NKX3-2
NLRP10
NME3
NMT2
NOB1
NOL6
NOS1AP
NPBWR1
NPNT
NR2C1
NR5A1
NRCAM
NRM
NRP2
NSUN5
NTF3
NUDT11
NUDT15
NUPR1
ODF2L
OR5A1
OSBP
OSCAR
OVCA2
PA2G4
PABPN1
PADI3
PAPPA
PARP10
PCOLCE2
PDCD1
PDE11A
PDLIM5
PDS5A
PECAM1
PFDN5
PKNOX2
PLEKHA4
PLGLB1
PLSCR4
PNMA3
PPARA
PPFIA1
PPIA
PPIAL4A
PPM1H
PROP1
PRR5
PRTN3
PSME3
PTBP1
PVT1
PYROXD1
RAB6C
RAB24
RABGEF1
RAPGEF1
RAPGEF3
RAPH1
RASEF
RASSF1
RBMX
RBMXL2
RFX5
RGL2
RGN
RHO
RHOD
RMND1
RNASEH2A
RNF115
RPAP2
RPL7
RPL12
RPL15
RPL21
RPL22
RPL29
RPS3A
RPS10
RPS14
RPUSD1
RYK
S1PR5
SCN4A
SF3A2
SFXN3
SHF
SIGLEC11
SIK1
SLAMF9
SLC12A1
SLC22A3
SLC22A11
SLC35A4
SLC35E1
SLC45A3
SLC46A2
SNRPB2
SNX12
SNX24
SOCS5
SOCS7
SPATA18
SPOCK2
SPRR2E
SPTLC3
SSX2
SSX2IP
ST3GAL2
STAT2
STIP1
SUDS3
SYNCRIP
TACC2
TACSTD2
TALDO1
TBCEL
TBRG4
TCEA1
TGM3
THRA
THSD1
TIMM10
TMEM92
TMEM107
TMPRSS6
TNFRSF11A
TP53I11
TP53INP2
TRAF3IP2
TRIM14
TRIM26
TSHB
TSHZ1
UBA52
UBE2G2
UBE2Q1
UGDH
UPK2
USP7
VNN1
VPS8
VPS41
XAB2
YPEL1
ZBTB22
ZDHHC7
ZNF18
ZNF80
ZNF135
ZNF257
ZNF274
ZNF280A
ZNF343
ZNF367
ZNF551
ZNF621
ZNF711
ZNF713
ZRANB2
ZSWIM1
AADAC
ABCA3
ABCC3
ABLIM1
ACSL4
ACTG2
ADAM19
ADAMTS5
ADAMTSL2
ADCY3
ADM
ADORA2B
ADRA2A
AEBP1
AGTPBP1
AK4
AKAP12
AKR1C4
ALDH1B1
ALPK2
ALPL
AMHR2
ANGPT1
ANK2
ANKRD1
ANKRD6
ANKRD35
ANLN
ANPEP
ANXA5
ANXA8L2
AOX1
APBB3
APOA1
APOD
AQP11
ARHGEF17
ARHGEF37
ARID3A
ARNT2
ASS1
ATP2C1
AXIN2
B3GNT2
B4GALT5
BAIAP2L2
BCAT1
BDKRB2
BDNF
BEX1
BEX2
BLOC1S1
BMP2
BNIP3
BNIP3L
C1orf54
C1orf115
C1QTNF1
C1QTNF5
C4BPB
C8orf33
C8orf34
C10orf67
C12orf57
CA9
CALB2
CANX
CARD9
CCDC85A
CCNYL1
CD9
CD24
CD44
CD47
CD59
CD200
CD248
CDC42EP5
CDCP1
CDH11
CDK5RAP2
CELF2
CFB
CFD
CGN
CGNL1
CHCHD5
CHCHD10
CHN1
CILP
CKAP5
CLDN1
COBLL1
COL5A1
COL6A3
COL7A1
COL8A1
COL14A1
COL18A1
COPZ2
CPA4
CPE
CPVL
CRISPLD2
CTHRC1
CTNNAL1
CTNNB1
CTSC
CTSH
CTSK
CXADR
CYP1B1
CYP11A1
CYP19A1
CYTL1
DAAM1
DAAM2
DACH1
DACT1
DAPK1
DBNDD1
DCP2
DENND2A
DES
DHCR24
DIAPH3
DIO2
DIRAS3
DIXDC1
DLC1
DMKN
DNAH2
DNAJC12
DNLZ
DPM3
DPYSL3
DPYSL4
DRAM1
DSEL
DSG2
DUSP1
E2F7
EEF1A2
EFEMP1
EFHD1
EFS
EHBP1
EML4
EMX2
ENAH
ENC1
ENO1
ENO2
ENPP4
ENPP5
ESYT2
ETFB
EZR
F2RL1
F3
F10
FABP4
FAM117B
FAM162B
FAP
FBLN1
FBP1
FBXL5
FGL2
FJX1
FNDC4
FOXF1
FRMD6
FXYD5
FZD7
GABRA5
GADD45A
GALNT9
GAS6
GAS7
GATA2
GATA4
GATM
GBP4
GCLM
GHR
GKN1
GLS
GPNMB
GPR162
GPRC5C
GPT2
GSG1
GSR
H19
HAND2
HBB
HCFC1R1
HEG1
HEPH
HINT2
HK2
HLX
HMCN1
HNMT
HOXA5
HOXA9
HOXA10
HOXA11
HOXB2
HOXB7
HOXC6
HOXC8
HOXD10
HOXD11
HPD
HPSE
HS3ST3A1
HSP90AA1
HTR2B
HTRA1
IFITM1
IFNGR1
IGFBP6
IL6ST
ING1
IPO5
IQCA1
IQCG
IRF1
IRF8
ISLR
ITLN1
ITLN2
ITPR1
JAZF1
KCNK2
KCNMB1
KCNT2
KIAA1522
KIT
KLHL5
KRT7
KRT34
KRT80
KRTCAP2
KTN1
LAMA1
LAMP2
LAPTM4B
LARP6
LAYN
LCP1
LDHA
LEPR
LEPROTL1
LFNG
LIPA
LOXL4
LPAR1
LRRN2
LUM
MAMDC2
MASP1
MBNL2
MBP
MDK
MEIS1
MFAP2
MGLL
MGP
MICAL1
MID1
MITF
MLPH
MMP2
MMP3
MMP11
MMP23B
MN1
MOXD1
MRAP2
MRGPRF
MT3
MYH11
MYLIP
NDP
NDRG2
NEFH
NEK7
NES
NGF
NID1
NNMT
NOTCH1
NPPB
NPY
NR1H3
NR2F1
NTRK2
NUDT2
NXPH2
OAF
OLFML2A
OLFML2B
OLFML3
OSBPL5
OSR1
PACSIN2
PAK2
PAM
PCDH18
PCK2
PCOLCE
PDE1A
PDE5A
PDE7B
PDE9A
PDK3
PDLIM3
PDLIM7
PEG3
PEMT
PERP
PGAM1
PGAM4
PGBD3
PGK1
PGM1
PIK3R1
PITX1
PKDCC
PLAC9
PLBD1
PLIN2
PLOD2
PMEPA1
PNCK
PNMA2
PNPLA7
PODXL
POFUT1
PON2
POPDC2
PPFIBP2
PPM1D
PPP4R4
PRDM1
PRKAG2
PRKCQ
PRKD1
PRPS1
PRRX1
PRUNE2
PSD3
PSG3
PSG5
PSG6
PSG9
PSMB9
PTGIS
PTH1R
PTK7
PTMS
PTPN1
PTPRD
PTPRF
PYROXD2
QPCT
QPRT
RAB3IL1
RAB11FIP1
RAB31
RAMP1
RARRES2
RCOR2
REC8
RERG
RGS2
RGS5
RNASE1
RND2
RPP25
RPS26
S1PR3
S100A4
S100A10
SAT1
SCD5
SCRG1
SEL1L3
SERPINE1
SERPINF1
SERTAD2
SERTAD4
SFRP4
SGIP1
SH2B3
SH2D4A
SH3BP4
SH3GL3
SH3RF2
SIPA1L2
SLC1A5
SLC2A5
SLC6A10P
SLC7A2
SLC7A3
SLC12A8
SLC23A2
SLC25A4
SLC39A8
SLC40A1
SMOC2
SMPDL3A
SNCAIP
SNRPN
SNX8
SOCS2
SORBS2
SOX13
SPHK1
SPRR1A
SPRR2B
SPRR2C
SPRR2F
SPRR2G
STAMBPL1
STAR
STARD10
STAT3
STC2
STOX2
STRA6
SULF1
SVEP1
SVIL
SYBU
SYNC
SYNE2
TAGLN2
TBL1X
TBX2
TBX3
TCEAL2
TFAP2C
TFPI
TFRC
TGFB3
TGM2
TIPARP
TLE2
TM4SF1
TMEM41A
TMEM119
TMEM204
TNFAIP1
TNFAIP8L3
TNFRSF11B
TNFRSF14
TNFRSF19
TOX2
TPI1P2
TRIM24
TSC22D1
TSPAN7
TSPAN8
TWIST2
TXNRD1
TYRO3
UBXN8
UPP1
USP13
VASH2
VAT1L
VLDLR
VTN
WDR86
WFDC1
WNT2B
WNT5A
WNT5B
WWC1
ZBTB46
ZCCHC9
ZCCHC24
ZFPM2
ZNF275
ZNF423
ZNF467
ZPLD1
ABAT
ABCB9
ACADL
ACOXL
ACP6
ACRBP
ACTC1
ACVR1C
ADAMTS2
ADAMTS9
ADD1
AGAP1
AGMAT
AGR3
AHNAK2
AKR1B10
ALDH8A1
ALOX12
AMFR
AMMECR1
ANGEL2
ANK1
ANKH
ANKRD20A1
ANKRD20A9P
ANKRD28
ANKRD33
ANXA1
AP1S1
AP3D1
APBB1IP
APOC2
APPL1
AQP3
ARC
ARHGAP6
ARHGAP9
ARHGAP22
ARID1B
ARSB
ASNS
ASPH
ASPN
ATF1
ATF7
ATG9B
ATG16L2
ATP2C2
ATP8A2
ATXN1
AVIL
AVPR1A
AZGP1
B2M
B4GALNT1
BACH2
BBX
BCAR1
BCL2
BCL2L10
BGLAP
BHLHE41
BICD1
BIN3
BPI
BPIFB1
C1orf53
C1orf116
C1orf162
C6orf132
C9orf24
C11orf80
C14orf28
C15orf48
C16orf74
C17orf100
C20orf85
CA2
CACNA1D
CAPN6
CAPSL
CASP6
CATSPERB
CBR3
CCDC15
CCDC60
CCDC78
CCL23
CCNL1
CCT6P1
CD3E
CD7
CD8A
CD36
CD37
CD109
CD209
CD247
CD300C
CD300LF
CDAN1
CDC7
CDC14B
CDC42BPA
CDCA7
CDH3
CDK9
CEACAM6
CELSR1
CEP95
CEP152
CERS6
CES1
CES4A
CHD9
CHI3L2
CHODL
CHST8
CISH
CKM
CLDN11
CLDN14
CLEC7A
CLMN
COL1A2
COL3A1
COL4A2
COL5A3
COL6A1
COL12A1
CORO1A
COX6A2
CP
CPD
CPM
CPPED1
CRIM1
CRISPLD1
CRLS1
CRP
CRYBB2
CSF3R
CTAG1A
CTAG2
CTAGE5
CTSW
CTTN
CTXN1
CXCL5
CXCL6
CXCL10
CXCL14
CYCS
CYP3A5
CYP4B1
CYP4F11
DAG1
DAPK1-IT1
DCAF7
DCAF8
DCAF17
DCBLD2
DDHD1
DDX17
DEFB4A
DEFB124
DENND1A
DENND1C
DEPDC1B
DERL3
DESI2
DHFR
DIAPH3-AS1
DIO3
DIO3OS
DISP2
DKK3
DLG5
DLK1
DMBT1
DNER
DOCK8
DPP6
DUOX1
DUOXA1
DUSP2
ECHDC3
EGOT
ELL2
ELOVL7
ENOSF1
EOMES
EPHA1
EPHX3
EPN2
EPOR
EPPK1
ERV3-2
EWSR1
F2RL2
FAM3C
FAM166B
FAM210A
FARS2
FAS
FBN2
FBXL16
FBXL20
FCER1G
FCGBP
FCHO2
FGFR1
FH
FILIP1
FKRP
FMNL3
FNBP4
FOLR2
FOXC1
FOXQ1
FRAT1
FXYD7
FZD10
GABRA2
GABRE
GADD45B
GAGE1
GAGE2A
GAGE2D
GAGE4
GAGE12E
GAGE12H
GAL
GAS5
GAST
GATAD1
GBP1
GBP3
GDF15
GFRA1
GGCX
GIMAP1
GIMAP8
GJB2
GLB1L2
GLT8D2
GNAS
GNGT2
GNLY
GP2
GPAT2
GPATCH4
GPBP1L1
GPCPD1
GPRC5B
GPX2
GPX3
GRP
GSG1L
GSN
GSTM1
GSTM2
GSTM4
GSTT1
GSTT2
GZMB
GZMM
HABP2
HAL
HAP1
HBA1
HCAR3
HGD
HINT1
HINT3
HLA-DPA1
HLA-DQA1
HLA-DQB2
HLA-DRB4
HNRNPA1
HNRNPU-AS1
HOXA11-AS
HOXB-AS3
HR
HRH1
HSPA6
HSPA12A
HSPA14
IFIT3
IFNAR1
IFT81
IGF2
IKZF1
IL1RN
IL12RB1
INSIG1
IP6K3
IRX5
ITGB3BP
JAK1
JUND
KANSL1
KCNG3
KCNK3
KHNYN
KIR2DL1
KIR2DL2
KIR2DL4
KIR2DL5B
KIR2DS1
KIR2DS3
KIR2DS4
KIR2DS5
KIR3DL1
KIR3DL3
KLF9
KLK8
KLK10
KLK11
KLK13
KLRB1
KREMEN1
KRR1
KRT4
KRT13
KRT86
LAIR1
LEFTY2
LGALS8
LHFPL3
LILRP2
LIMD2
LINC00240
LINC00597
LMCD1
LOXL1
LOXL1-AS1
LPAR5
LRCH3
LRIG3
LRPAP1
LRRC37A3
LSM4
LTC4S
LTF
LYPD3
LZTS1
MAGIX
MALAT1
MAP6D1
MAPK11
MAPK13
MATN3
MBD4
MEGF8
MEGF10
METTL8
MFSD2A
MIR30C2
MIR210HG
MIR1204
MLH3
MLX
MMP1
MMP9
MMP12
MMP17
MOGAT1
MPZL3
MRPL50
MRTO4
MS4A7
MSLN
MTHFD2L
MTHFR
MTHFSD
MUC5AC
MUC5B
MYL6
MYO1D
MYRIP
N4BP3
NAMPT
NCKAP5L
NCR3
NEFM
NENF
NFAT5
NFATC2IP
NFKBID
NHSL1
NIPSNAP1
NKAIN1
NKD2
NLRP2
NOS3
NPTX2
NR1D2
NREP
NRIP1
NRTN
NSD1
NSUN7
NTNG2
NUDT4
NUP62
NUSAP1
OASL
OGFOD1
OLFM1
OR7D2
ORAI2
OTOR
PAAF1
PAEP
PAG1
PALM3
PAQR3
PARD3
PART1
PAX8
PCBP2
PCDHA1
PCDHA3
PCDHA6
PCDHA9
PCDHA12
PCGF2
PCNP
PDCD5
PDCD6
PDE4B
PDPR
PF4
PHACTR2
PHLDA1
PI3
PI15
PIK3IP1
PIP5KL1
PIR
PITPNM3
PKHD1L1
PLCB1
PLCL1
PLCXD3
PLEKHA2
PLEKHG3
PNN
POC5
PPP1R12B
PRAME
PRF1
PRG2
PRKRA
PROK1
PROK2
PROM1
PRSS2
PRSS3P2
PRTG
PSMG4
PSTPIP1
PTGDR
PTGR1
PTPN5
PVRIG
PXMP4
RAB12
RAB15
RAB18
RAB27B
RABEP1
RAC2
RALGAPA2
RASA4
RASAL1
RASGRP2
RBM26
RBMXL1
RBP1
RC3H1
RDH5
RFC4
RGS1
RGS16
RIMS3
RMI2
RND1
RNF144B
RNF213
RPGRIP1L
RPL17
RPPH1
RPS16P5
RRM2
RUFY3
S1PR4
S100A2
SARNP
SCAF11
SCARA5
SCD
SCG5
SCNN1G
SDHAP2
SEC62
SEMA6B
SERPINB2
SERPINB6
SGPP2
SGSM2
SH3BP2
SIGLEC10
SIRT2
[truncated: 1,761 more rows]
