# Supplementary material for: Molecular Mechanisms of Endometriosis Revealed Using Omics Data
Source: Biomedicines. 2023 Aug 7;11(8):2210. doi: 10.3390/biomedicines11082210 (PMC10452455; doi:10.3390/biomedicines11082210)
Supplement: Supplementary file 1 [file biomedicines-11-02210-s001.zip › Supplementary Table S8.xlsx]

## Sheet: trans.genes.gobp.sig.re
GOBP	Gene	OR	P value
GOBP_IMMUNE_RESPONSE	ADA;KLRC4-KLRK1;RASGRP1;LILRB2;ADAR;NOD1;SEMA3C;CXCL13;KHDRBS1;CXCR6;CD226;CCR9;LILRB1;PHB2;CHUK;FCRL3;CCR1;CCR5;CCR7;CCR8;LTB4R;CNR1;CD200R1;CRHR1;CRK;DOCK11;CRP;SIRPA;PARP1;MAPK14;CSF1;CSF1R;CSF2;CSF3;CSK;IL34;CTLA4;CX3CR1;CD55;DAPK1;DEFB4A;CFD;DRD2;EDN1;AHR;AIF1;EPHB2;ERCC1;ESR1;ETS1;F2;F2RL1;FCGR3A;FCGR3B;FGA;KLRK1;SIRT1;FPR1;FPR2;CADM1;ALOX15;IL27;MTOR;NCR3;PTPN22;GATA2;GATA3;GATA6;FOXP1;IL3…	5.3187	7.53658e-179
GOBP_REGULATION_OF_IMMUNE_SYSTEM_PROCESS	ADA;KLRC4-KLRK1;DNM1L;RASGRP1;CDK6;CDKN1A;LILRB2;ADAR;NOD1;CEBPA;CIB1;OLFM4;CXCL13;KHDRBS1;CD226;LILRB1;PHB2;FCRL3;LRRK2;H4-16;CCR1;CCR7;CNR1;CD200R1;CREB1;CRK;SIRPA;PARP1;MAPK14;CSF1;CSF1R;CSF3;CSK;IL34;CTLA4;CTNNB1;CX3CR1;CYP19A1;CD55;CFD;DPP4;DRD2;DUSP1;EDN1;AHR;AIF1;EPHB2;EPO;ERBB2;AKT1;ESR1;ETS1;F2RL1;FANCD2;FBN1;FCGR3A;FCGR3B;KLRK1;FOXO3;PLCB1;FN1;SIRT1;FOS;FPR1;FPR2;DAPK2;CADM1;ALOX15;IL27…	5.98024	1.84194e-171	GOBP: gene ontology biological process
GOBP_DEFENSE_RESPONSE	ADA;KLRC4-KLRK1;ABCC9;RASGRP1;LILRB2;ADAR;NOD1;CEBPA;CXCL13;CXCR6;CD226;CCR9;LILRB1;PHB2;CHUK;LRRK2;CCR1;CCR5;CCR7;LTB4R;CNR1;CD200R1;ADM;CRH;CRK;CRP;SIRPA;PARP1;MAPK14;CSF1;CSF1R;IL34;CX3CR1;CYP19A1;CD55;DAPK1;ACE;DEFB4A;CFD;DPP4;DRD2;AGT;AGTR1;AGTR2;EDN1;AHSG;AIF1;EPHB2;EPO;AKT1;ESR1;ETS1;EZH2;F2;F2R;F2RL1;F3;FANCD2;FCGR3A;FGA;KLRK1;FN1;FOS;FPR1;FPR2;CADM1;ALOX15;IL27;MTOR;NCR3;PTPN22;GATA3;GAT…	5.20518	8.09662e-164	Gene: common genes between input genes and genes of a gene set
GOBP_CELL_ADHESION	ADA;CDH3;BCL2L11;KLRC4-KLRK1;RASGRP1;CDH15;PLXNC1;CDK6;LILRB2;CDKN2A;PAK4;MYL9;CIB1;AGR2;OLFM4;CXCL13;PDLIM5;POSTN;CD226;HPSE;LILRB1;MMP24;CCR1;CCR7;CCR8;COL1A1;CD200R1;CLDN4;CLDN3;CLDN7;CRK;SIRPA;MAPK14;CSF1;CSK;VCAN;CCN2;CTLA4;CTNNB1;CCDC80;CX3CR1;CYP1B1;CD55;DPP4;DUSP1;S1PR1;EGFR;AIF1;EPHA3;EPHB2;EPHB4;EPO;ERBB2;AKT1;ETS1;FBLN1;FBN1;FGA;KLRK1;KIFAP3;FOXO3;PLXND1;ASTN2;FN1;ITGB3BP;FPR2;CADM1;AL…	5.66632	6.75851e-161	OR: odds ratio
GOBP_BIOLOGICAL_PROCESS_INVOLVED_IN_INTERSPECIES_INTERACTION_BETWEEN_ORGANISMS	KLRC4-KLRK1;ABCC9;RASGRP1;CDK4;CDK6;LILRB2;ADAR;NOD1;CXCL13;CD226;CFL1;LILRB1;PHB2;CHUK;CCR5;CCR7;CNR1;ADM;CLDN3;CRK;CRP;SIRPA;PARP1;MAPK14;CSF1;CSF1R;CSF2;CSF3;IL34;CCDC80;CX3CR1;CYP1A1;CD55;DAPK1;ACE;DEFB4A;CFD;DIO2;DPP4;DRD2;AGTR1;EDN1;EGFR;AIF1;ENO1;EPHB2;EPO;AKT1;F2;F2R;F2RL1;FCGR3A;FGA;FGFR2;FKBP5;KLRK1;FN1;FOS;FPR2;CADM1;IL27;NCR3;PTPN22;GATA3;GATA6;GJB2;ANKRD1;FOXP1;IL37;PDCD4;ANG;GPER1;C…	5.09803	1.02327e-151
GOBP_POSITIVE_REGULATION_OF_MULTICELLULAR_ORGANISMAL_PROCESS	ADA;PDCD6;KLRC4-KLRK1;RASGRP1;PLXNC1;LILRB2;PAK4;NOD1;YAP1;FST;CIB1;CD226;CFL1;CFTR;HPSE;LILRB1;PPARGC1A;CHRM3;CHUK;OSR2;LRRK2;CCR1;CCR7;CNR1;COL1A1;ADM;CPB2;CRABP2;CREB1;CRH;PARP1;MAPK14;CSF1;CSF1R;CSF2;IL34;ADRA1A;CCN2;CTNNB1;ADRA2B;CX3CR1;CYP1B1;CYP19A1;CD55;ACE;DECR1;ARX;DIO2;AGRP;DRD2;AGT;AGTR2;EDN1;EGF;MEGF8;EGR1;AIF1;ENO1;EPHB2;AKT1;ESRRB;ETS1;EZH2;F2;F2R;F2RL1;F3;FCGR3A;FGA;FGF1;FGF2;FGF9…	5.05244	4.1173e-137
GOBP_CELL_ACTIVATION	ADA;KLRC4-KLRK1;RASGRP1;CDK6;CDKN1A;LILRB2;NDRG1;MYL9;CEBPA;CD226;CCR9;LILRB1;PHB2;FCRL3;LRRK2;CCR7;CNR1;DOCK11;SIRPA;MAPK14;CSF1;CSF2;CSK;CCN2;CTLA4;CTNNB1;ADRA2B;CX3CR1;CD55;DPP4;EDN1;EGR1;AHR;AIF1;EPHB2;EPO;ERBB2;ERCC1;AKT1;EZH2;F2;F2R;F2RL1;FANCD2;FCGR3A;FGA;KLRK1;FOXO3;PLCB1;FN1;CADM1;IL27;MTOR;NCR3;PTPN22;GATA2;GATA3;GBA;FOXP1;TNFRSF21;GLI3;GPER1;CD274;MSH6;TBX21;ANXA1;HLA-DPB1;HLA-DQB1;HLA…	6.07321	7.293e-137
GOBP_TISSUE_DEVELOPMENT	ADA;CDH3;PDCD6;CDK4;CDK6;CDKN1B;YAP1;CDX1;FST;CEBPA;SEMA3C;AGR2;PDLIM5;TXNIP;POSTN;CFTR;HPSE;PPARGC1A;AKAP13;PHB2;CTHRC1;OSR2;CCR1;COL1A1;ADM;CLDN3;CRABP2;CREB1;PARP1;MAPK14;CSF1;CSF1R;ADRA1A;CCN2;CTNNB1;CYP1A1;CYP1B1;AKR1C1;AKR1C2;DDX5;ARX;DLX3;DLX5;AGT;HBEGF;DUSP1;DUSP2;AGTR2;S1PR1;EDN1;EDNRA;EGF;MEGF8;EGFR;EGR1;AHSG;EPHA3;EPOR;ERCC2;AKT1;ESR1;EZH2;F2RL1;FGF1;FGF2;FGF9;FGFR2;DKK1;AKR1B1;PLXND1;…	4.27845	2.17697e-130
GOBP_CELL_MOTILITY	ADA;CDKN2B-AS1;MIR543;PDCD6;KLRC4-KLRK1;DNM1L;PLXNC1;CDK6;PAK4;SEMA3C;CIB1;OLFM4;CXCL13;CXCR6;CCR9;PHB2;CTHRC1;LRRK2;CCR1;CCR5;CCR7;CCR8;COL1A1;CD200R1;CLDN4;CLDN3;CLDN7;CRK;SIRPA;MAPK14;CSF1;CSF1R;CSF2;IL34;CCN2;CTNNB1;CX3CR1;CYP1B1;CYP19A1;DCN;ACE;DEFB4A;ARX;DPP4;DRD2;AGT;HBEGF;DUSP1;AGTR1;AGTR2;S1PR1;EDN1;EDNRA;EGF;MEGF8;EGFR;AIF1;EMX2;EPHA3;EPHB2;EPHB4;AKT1;ETS1;F2R;F2RL1;F3;FBLN1;FGF1;FGF2;F…	4.51376	5.97269e-130
GOBP_RESPONSE_TO_OXYGEN_CONTAINING_COMPOUND	BCL2L11;KLRC4-KLRK1;ABCC9;CDK4;CDKN1B;LILRB2;NOD1;YAP1;CARM1;CXCL13;TXNIP;POSTN;CFTR;LILRB1;CHRM3;PHB2;UCN3;CHUK;LRRK2;CCR5;CCR7;CNR1;COL1A1;ADM;CPB2;CLDN4;CLDN3;CLDN7;CREB1;CRHR1;CRHR2;CRK;SIRPA;PARP1;MAPK14;CSF1;CSF2;CSF3;CSK;CCN2;CTNNB1;GPBAR1;CX3CR1;CYP1A1;CYP1B1;CYP11A1;CYP19A1;CYP26A1;CD55;DAPK1;ACE;AKR1C1;AKR1C2;DIO2;DNMT1;DNMT3A;AGRP;DRD2;AGT;AGTR1;AGTR2;EDN1;EDNRA;EGFR;EGR1;AHR;AHSG;AIF1…	4.61829	2.91543e-128
GOBP_POSITIVE_REGULATION_OF_IMMUNE_SYSTEM_PROCESS	ADA;KLRC4-KLRK1;DNM1L;RASGRP1;CDKN1A;LILRB2;NOD1;CEBPA;CXCL13;KHDRBS1;CD226;LILRB1;PHB2;FCRL3;LRRK2;CCR1;CCR7;CNR1;CREB1;SIRPA;CSF1;CSF1R;CSK;IL34;CTLA4;CX3CR1;CD55;CFD;DPP4;EDN1;AIF1;EPHB2;EPO;AKT1;F2RL1;FCGR3A;KLRK1;FOXO3;SIRT1;FOS;FPR1;FPR2;DAPK2;CADM1;NCR3;PTPN22;GATA2;GATA3;MSTN;FOXP1;TNFRSF21;GLI3;CD274;TBX21;ANXA1;HCK;HK1;HLA-B;HLA-DPB1;HLA-DQB1;HLA-DRB1;HLA-G;HMGB1;HSPD1;ICAM1;ID2;CFI;IFN…	6.32254	1.75046e-123
GOBP_REGULATION_OF_RESPONSE_TO_EXTERNAL_STIMULUS	ADA;KLRC4-KLRK1;DNM1L;RASGRP1;ADAR;NOD1;CEBPA;SEMA3C;CXCL13;CD226;HPSE;LILRB1;LRRK2;CCR1;CCR7;CNR1;CD200R1;CPB2;CLDN3;CRK;SIRPA;PARP1;MAPK14;CSF1;CSF1R;IL34;CX3CR1;CYP19A1;CD55;ACE;DPP4;DRD2;AGT;DUSP1;AGTR1;S1PR1;EDN1;MEGF8;AHSG;AIF1;EPHB2;ESR1;ETS1;F2;F2R;F2RL1;F3;FANCD2;FGA;FGF1;FGF2;KLRK1;FPR2;DAPK2;CADM1;ALOX15;IL27;NCR3;PTPN22;GATA3;GATA6;GBA;GREM1;MSTN;FOXP1;IL37;PDCD4;ANGPT2;GPER1;GPX4;GST…	6.07695	1.0252e-122
GOBP_APOPTOTIC_PROCESS	ADA;SRA1;PDCD6;BCL2L11;DNM1L;CDKN1A;CDKN1B;CDKN2A;PAK4;ADAR;NOD1;YAP1;CIB1;OLFM4;TXNIP;CFL1;LILRB1;PPARGC1A;BRD8;PHB2;LRRK2;CCR7;CNR1;ADM;CLDN7;PARP1;MAPK14;CSF1R;CSF2;ADRA1A;CTH;CTLA4;CTNNB1;CX3CR1;CYP1B1;DAPK1;ACE;DDX5;DNMT1;DNMT3A;AGT;DUSP6;AGTR2;EDN1;EDNRA;EGFR;EGR1;AHR;AIF1;ENO1;EPO;ERCC2;AKT1;ERCC6;ESR1;ALB;F2R;FGA;FGFR2;KIFAP3;DKK1;FOXO1;FOXO3;AKR1B1;PLXND1;DICER1;SIRT1;ITGB3BP;DAPK2;NUP62…	4.16378	4.26068e-121
GOBP_NEGATIVE_REGULATION_OF_RESPONSE_TO_STIMULUS	ADA;PDCD6;KLRC4-KLRK1;TOB1;ADAR;YAP1;FST;SEMA3C;CIB1;CXCL13;LILRB1;PHB2;FCRL3;CTHRC1;LRRK2;CD200R1;ADM;CPB2;CLDN3;CRK;SIRPA;PARP1;MAPK14;CSF2;CSK;ADRA1A;CTH;CTLA4;CTNNB1;CX3CR1;CYP19A1;CYP26A1;CD55;DCN;DPP4;DRD2;AGT;DUSP1;DUSP2;DUSP6;AGTR2;EDN1;MEGF8;EGFR;EGR1;AHR;AHSG;AIF1;ENO1;EPHB2;EPO;ERCC1;AKT1;ERCC6;ESR1;EZH2;F2;F2RL1;FBLN1;FBN1;FGA;FGF2;FGF9;KLRK1;DKK1;FOXM1;FOXO1;FOXO3;SIRT1;HEY1;FPR2;NUP…	4.4179	3.24e-120
GOBP_REGULATION_OF_CELL_POPULATION_PROLIFERATION	ADA;CDH3;PDCD6;TOB1;CDK4;CDK6;CDKN1A;CDKN1B;LILRB2;CDKN2A;CDKN3;NDRG1;YAP1;CARM1;CEBPA;CIB1;TXNIP;CTCF;HPSE;LILRB1;PPARGC1A;NUDT6;PHB2;FCRL3;CTHRC1;OSR2;LRRK2;SGPP2;ADM;CPB2;CLDN3;CLDN7;CRP;MAPK14;CSF1;CSF1R;CSF2;CSF3;CSK;IL34;ADRA1A;CCN2;CTLA4;CTNNB1;GPBAR1;CX3CR1;CYP1B1;CD55;ACE;AKR1C2;ARX;DLX5;DNMT1;DPP4;DRD2;AGT;HBEGF;DUSP1;AGTR1;S1PR1;EDN1;EGF;EGFR;EGR1;AHR;AIF1;EPHB2;EPO;EPOR;ERBB2;AKT1;ESR…	4.29932	3.7896e-119
GOBP_RESPONSE_TO_CYTOKINE	CDK4;LILRB2;ADAR;YAP1;CEBPA;CIB1;CXCL13;CXCR6;CCR9;LILRB1;STIP1;CHUK;CCR1;CCR5;CCR7;CCR8;COL1A1;CREB1;SIRPA;MAPK14;CSF1;CSF1R;CSF2;CSF3;IL34;CTH;CX3CR1;CYP1B1;DAPK1;DOK1;DUSP1;EDN1;EGR1;AIF1;EPO;EPOR;AKT1;F2RL1;F3;FOXO3;PLCB1;SIRT1;FOS;ALOX15;NR5A2;GATA3;GBA;ANKRD1;FOXP1;CACYBP;IL37;TNFRSF21;CXCR3;ANGPT1;GPER1;CD274;CXCL1;PDIA3;GSK3B;GSTP1;ANXA1;HCK;HIF1A;FOXA2;BIRC2;BIRC3;ICAM1;IFI27;IFIT1;IFNA1…	6.29729	5.44253e-119
GOBP_LOCOMOTION	ADA;CDKN2B-AS1;MIR543;PDCD6;KLRC4-KLRK1;DNM1L;PLXNC1;CDK6;SEMA3C;CIB1;OLFM4;CXCL13;CXCR6;CCR9;LRRK2;CCR1;CCR5;CCR7;CCR8;COL1A1;CD200R1;CLDN4;CLDN3;CLDN7;CRK;CRMP1;MAPK14;CSF1;CSF1R;CSF2;IL34;CX3CR1;CYP1B1;CYP19A1;DCN;ACE;DEFB4A;ARX;DLX5;DPP4;DPYSL2;DRD2;AGT;HBEGF;DUSP1;AGTR1;AGTR2;S1PR1;EDN1;EDNRA;EGF;MEGF8;EGFR;AIF1;EPHA3;EPHB2;EPHB4;ERBB2;AKT1;ETS1;F2R;F2RL1;F3;FBLN1;FGF1;FGF2;FGF9;KLRK1;FOXO3;…	4.69186	1.08835e-114
GOBP_REGULATION_OF_IMMUNE_RESPONSE	ADA;KLRC4-KLRK1;RASGRP1;LILRB2;ADAR;NOD1;CXCL13;KHDRBS1;CD226;LILRB1;PHB2;FCRL3;CCR7;CNR1;CD200R1;CRK;PARP1;MAPK14;CSK;CTLA4;CD55;CFD;DRD2;AHR;EPHB2;ESR1;F2RL1;FCGR3A;FCGR3B;KLRK1;SIRT1;FPR1;FPR2;CADM1;ALOX15;IL27;NCR3;PTPN22;GATA2;GATA3;GATA6;FOXP1;TNFRSF21;CD274;TBX21;ANXA1;HCK;HLA-B;HLA-DPB1;HLA-DQB1;HLA-DRB1;HLA-G;HMGB1;BIRC2;BIRC3;HSPD1;CFI;IFNG;APOE;TICAM2;IL1B;IL1R1;IL2;IL4;IL6;IL7R;IL10;I…	6.03857	7.75842e-111
GOBP_REGULATION_OF_INTRACELLULAR_SIGNAL_TRANSDUCTION	ADA;PDCD6;BCL2L11;DNM1L;RASGRP1;PAK4;NOD1;CIB1;HPSE;AKAP13;PHB2;CHUK;FCRL3;LRRK2;CCR1;CCR7;CRK;SIRPA;PARP1;MAPK14;CSF1;CSF1R;CSF3;CSK;IL34;ADRA1A;CCN2;CTH;CTNNB1;ADRA2B;GPBAR1;CX3CR1;DCN;AKR1C2;DDX5;DRD2;AGT;HBEGF;DUSP1;DUSP2;DUSP6;EDN1;EGF;EGFR;ENO1;EPHB2;EPO;ERBB2;AKT1;ESR1;EZH2;F2;F2R;F2RL1;F3;FBLN1;FGA;FGF1;FGF2;FGFR2;DKK1;FOXM1;FOXO1;FLT1;PLCB1;FN1;SIRT1;LPAR3;FPR2;DAPK2;NUP62;SH3BP4;ALOX15;…	4.13236	1.28346e-110
GOBP_REGULATION_OF_TRANSPORT	ADA;CDH3;DNM1L;ABCC9;LILRB2;CIB1;OLFM4;KHDRBS1;CETP;CFTR;LILRB1;PRRT2;SCN11A;CHRM3;PHB2;UCN3;FCRL3;LRRK2;CCR1;CNR1;CPB2;CLDN3;CREB1;CRH;CRHR1;SIRPA;MAPK14;CSK;ADRA1A;CNIH3;CTNNB1;ADRA2B;TTC39B;CYP19A1;DAPK1;ACE;DPP6;DRD2;AGT;AGTR1;EDN1;EDNRA;EGF;AHSG;EPHA3;EPHB2;EPO;ERBB2;AKT1;F2;F2R;F2RL1;FGA;DKK1;FOXO1;NEDD4L;SIRT1;FPR2;ALOX15;GATA2;GREM1;GDNF;GH1;GHRH;GHRHR;GJA1;ANKRD1;GLI3;ANG;ANGPT1;GPER1;RE…	4.09174	2.69206e-110
GOBP_POSITIVE_REGULATION_OF_MOLECULAR_FUNCTION	CDH3;PDCD6;BCL2L11;RASGRP1;CDKN1A;CDKN1B;NOD1;CIB1;CXCL13;AHSA1;CFTR;PPARGC1A;AKAP13;PHB2;CHUK;FCRL3;CTHRC1;CKS1B;LRRK2;CCR7;CLDN4;CLDN3;CRHR1;CRK;DOCK11;PARP1;MAPK14;CSF1;CSF1R;CSF3;CSK;IL34;ADRA1A;CCN2;CTH;CTNNB1;ADRA2B;CX3CR1;DAPK1;ACE;DRD2;AGT;HBEGF;AGTR1;AGTR2;S1PR1;EDN1;EDNRA;EGF;EGFR;EGR1;EPHA3;EPHB2;EPHB4;EPO;ERBB2;ERCC2;AKT1;ERCC6;ESR1;ESR2;EZH2;F2;F2R;F2RL1;F3;FBLN1;FGF1;FGF2;FGFR2;DKK1…	4.34937	2.91877e-110
GOBP_REGULATION_OF_CELL_ADHESION	ADA;KLRC4-KLRK1;RASGRP1;PLXNC1;CDK6;LILRB2;CDKN2A;CIB1;AGR2;OLFM4;CXCL13;LILRB1;CCR7;COL1A1;CLDN7;CRK;SIRPA;MAPK14;CSF1;CSK;CTLA4;CCDC80;CYP1B1;CD55;DPP4;DUSP1;S1PR1;AIF1;EPHA3;EPHB2;EPO;ERBB2;AKT1;ETS1;FBLN1;FGA;KLRK1;KIFAP3;FOXO3;PLXND1;FN1;ALOX15;ABI3BP;POLDIP2;PTPN22;GATA3;GREM1;TNFRSF21;GLI3;CXCR3;ANGPT1;ANGPT2;CD274;GSK3B;TBX21;ANXA1;HLA-DPB1;HLA-DQB1;HLA-DRB1;HLA-G;HMGB1;FOXA2;HSPD1;TNC;IF…	6.56861	5.17243e-110
GOBP_POSITIVE_REGULATION_OF_SIGNALING	ADA;CDH3;BCL2L11;DNM1L;RASGRP1;LILRB2;NOD1;YAP1;CIB1;AGR2;CD226;CFTR;HPSE;AKAP13;PHB2;UCN3;CHUK;FCRL3;LRRK2;CCR1;CCR7;CNR1;COL1A1;CREB1;CRH;CRHR2;CRK;PARP1;CSF1;CSF1R;CSF3;CSK;IL34;ADRA1A;CCN2;CTH;CTNNB1;ADRA2B;GPBAR1;CX3CR1;CYP1B1;CYP19A1;DCN;AKR1C2;DDX5;DLX5;DRD2;AGT;HBEGF;AGTR2;EDN1;EGF;EGFR;EPHB2;EPO;ERBB2;EZH2;F2;F2R;F2RL1;F3;FGA;FGF1;FGF2;FGF9;FGFR2;DKK1;FLT1;PLCB1;FN1;SIRT1;LPAR3;FPR2;NUP6…	4.11496	1.91635e-109
GOBP_CELL_CELL_ADHESION	ADA;CDH3;KLRC4-KLRK1;RASGRP1;CDH15;LILRB2;PAK4;MYL9;CXCL13;PDLIM5;LILRB1;MMP24;CCR7;CD200R1;CLDN4;CLDN3;CLDN7;SIRPA;MAPK14;CSK;CTLA4;CTNNB1;CX3CR1;CYP1B1;CD55;DPP4;EGFR;AIF1;EPO;ERBB2;AKT1;ETS1;FGA;KLRK1;KIFAP3;FOXO3;ASTN2;FN1;CADM1;CADM2;NECTIN3;PTPN22;GATA3;TNFRSF21;GLI3;CD274;TMOD3;TBX21;ANXA1;ANXA2;HLA-DPB1;HLA-DQB1;HLA-DRB1;HLA-G;HMGB1;FOXA2;HSPD1;ICAM1;IFNG;IGF1;CCN1;IHH;IL1A;IL1B;IL1RAP;IL…	5.80777	2.39883e-109
GOBP_RESPONSE_TO_ENDOGENOUS_STIMULUS	SRA1;BCL2L11;TOB1;CDK4;CDKN1B;NOD1;YAP1;FST;CARM1;CIB1;CXCL13;TXNIP;CFTR;BRD8;CHRM3;PHB2;UCN3;LRRK2;CCR7;COL1A1;ADM;CLDN4;CREB1;CRHR1;CRHR2;CRK;PARP1;MAPK14;CSF1;CSK;ADRA1A;CCN2;CTNNB1;CX3CR1;CYP1B1;CYP11A1;ACE;AKR1C1;AKR1C2;DDX5;DLX3;DLX5;DNMT1;DNMT3A;AGRP;DRD2;AGT;AGTR1;AGTR2;EDN1;EDNRA;MEGF8;EGFR;EGR1;AHR;AHSG;AIF1;EPHB2;EPO;ERBB2;AKT1;ESR1;ESR2;ESRRB;EZH2;FBN1;FGF1;FGF2;FGF9;FGFR2;FKBP4;DKK1;…	4.24675	6.7818e-109
GOBP_REGULATION_OF_CELL_DEATH	ADA;SRA1;BCL2L11;DNM1L;CDKN1A;CDKN1B;CDKN2A;PAK4;ADAR;NOD1;YAP1;CIB1;AGR2;OLFM4;TXNIP;MTCO2P12;CFL1;LILRB1;PPARGC1A;BRD8;PHB2;LRRK2;CCR7;CNR1;CD200R1;ADM;CLDN7;PARP1;CSF1;CSF1R;CSF2;CSF3;CCN2;CTH;CTLA4;CTNNB1;CX3CR1;CYP1B1;DAPK1;ACE;DNMT1;DNMT3A;DRD2;AGT;DUSP6;AGTR2;EDN1;EGFR;EGR1;AIF1;ENO1;EPO;AKT1;ESR1;ALB;F2R;FGA;FGF2;FGFR2;KIFAP3;DKK1;FOXO1;FOXO3;AKR1B1;PLXND1;SIRT1;FOS;DAPK2;NUP62;MTOR;GATA2…	4.17238	3.40139e-108
GOBP_RESPONSE_TO_LIPID	BCL2L11;KLRC4-KLRK1;CDK4;CDKN1B;LILRB2;YAP1;CARM1;CXCL13;TXNIP;CFTR;LILRB1;PHB2;UCN3;CCR5;CCR7;CNR1;COL1A1;ADM;CLDN4;CREB1;SIRPA;PARP1;MAPK14;CSF1;CSF2;CSF3;CCN2;CTNNB1;GPBAR1;CX3CR1;CYP1A1;CYP1B1;CYP19A1;CYP26A1;CD55;ACE;AKR1C1;AKR1C2;DDX5;DIO2;DNMT3A;AGT;EDN1;EGFR;AHR;AIF1;EPHA3;EPHB2;EPO;AKT1;ESR1;ESR2;ESRRB;EZH2;F2R;FGFR2;FKBP4;KLRK1;DKK1;FOXO1;FOXO3;PLCB1;SIRT1;FOS;PTPN22;GATA2;GATA6;GBA;MST…	5.91587	9.97074e-108
GOBP_PHOSPHORYLATION	RASGRP1;CDK4;CDK6;CDKN1A;CDKN1B;CDKN2A;PAK4;ADAR;CDKN3;CEBPA;CIB1;AKAP13;PHB2;CHUK;CKS1B;LRRK2;CCR7;CLDN3;CREB1;SIRPA;MAPK14;CSF1;CSF1R;CSF2;CSF3;CSK;IL34;ADRA1A;CCN2;PDIK1L;ADRA2B;CX3CR1;DAPK1;ACE;DRD2;AGT;HBEGF;DUSP1;DUSP6;EDN1;EDNRA;EGF;EGFR;EGR1;AIF1;ENO1;EPHA3;EPHB2;EPHB4;EPO;ERBB2;AKT1;ERCC6;EZH2;F2;FBLN1;FGF1;FGF2;FGF9;FGFR2;DKK1;FLT1;FN1;SIRT1;FPR2;DAPK2;NUP62;MTOR;PTPN22;GBA;GREM1;MSTN;A…	3.9629	1.14779e-107
GOBP_REGULATION_OF_RESPONSE_TO_STRESS	ADA;BCL2L11;KLRC4-KLRK1;RASGRP1;ADAR;NOD1;CEBPA;AGR2;CD226;HPSE;LILRB1;BRD8;LRRK2;CCR7;CNR1;CD200R1;CPB2;CLDN4;CLDN3;CRK;SIRPA;PARP1;MAPK14;CCN2;CTNNB1;CYP19A1;ACE;DDX5;DRD2;AGT;HBEGF;DUSP1;AGTR1;EDN1;EGFR;AHSG;ENO1;EPHB2;EPO;ERCC1;AKT1;ERCC6;ESR1;ETS1;F2;F2R;F2RL1;F3;FANCD2;FGA;FGF2;KLRK1;FOXM1;FOXO1;FOXO3;PLCB1;SIRT1;FPR2;CADM1;ALOX15;IL27;MTOR;NCR3;PTPN22;GATA3;GATA6;GBA;GREM1;ANKRD1;FOXP1;IL3…	4.51034	4.71104e-107
GOBP_INFLAMMATORY_RESPONSE	ADA;RASGRP1;NOD1;CEBPA;CXCL13;CXCR6;CHUK;LRRK2;CCR1;CCR5;CCR7;LTB4R;CNR1;CD200R1;ADM;CRH;CRP;SIRPA;MAPK14;CSF1;CSF1R;IL34;CX3CR1;CYP19A1;ACE;AGT;AGTR1;AGTR2;AHSG;AIF1;EPHB2;EPO;AKT1;ESR1;ETS1;EZH2;F2;F2R;F2RL1;F3;FANCD2;FCGR3A;FN1;FOS;FPR1;FPR2;ALOX15;IL27;MTOR;NCR3;GATA3;GBA;FOXP1;IL37;PDCD4;CXCR3;GPER1;GPX4;CXCL1;GSTP1;ANXA1;HCK;HGF;HIF1A;HK1;HLA-DRB1;HMGB1;HP;BIRC2;BIRC3;APOA2;TNC;IFNG;IFNGR1;…	6.19309	6.12046e-107
GOBP_DEFENSE_RESPONSE_TO_OTHER_ORGANISM	KLRC4-KLRK1;ABCC9;RASGRP1;ADAR;NOD1;CXCL13;CD226;LILRB1;PHB2;CHUK;CRK;CRP;SIRPA;PARP1;CSF1;CSF1R;IL34;CX3CR1;CD55;DAPK1;DEFB4A;CFD;DRD2;EDN1;AIF1;F2;F2RL1;FCGR3A;FGA;KLRK1;FPR2;CADM1;IL27;NCR3;PTPN22;GATA3;GATA6;FOXP1;ANG;GPER1;CXCL1;ANXA1;HCK;HK1;HLA-B;HLA-C;HLA-G;HMGB1;HP;BIRC2;BIRC3;CFI;IFI27;IFIT1;IFNA1;IFNA13;IFNG;IFNGR1;APOE;RBPJ;TICAM2;IL1B;IL1RAP;FASLG;IL4;IL6;IL7R;CXCL8;AQP1;IL10;IL12B;I…	4.99836	1.6196e-105
GOBP_LYMPHOCYTE_ACTIVATION	ADA;KLRC4-KLRK1;RASGRP1;CDK6;CDKN1A;LILRB2;CCR9;LILRB1;PHB2;FCRL3;CCR7;DOCK11;SIRPA;CSK;CTLA4;CTNNB1;CD55;DPP4;EGR1;AHR;AIF1;EPHB2;EPO;ERBB2;ERCC1;AKT1;EZH2;F2RL1;FANCD2;FCGR3A;KLRK1;FOXO3;CADM1;IL27;MTOR;NCR3;PTPN22;GATA3;GBA;FOXP1;TNFRSF21;GLI3;CD274;MSH6;TBX21;ANXA1;HLA-DPB1;HLA-DQB1;HLA-DRB1;HLA-G;HMGB1;HPRT1;HSPD1;ICAM1;ID2;IFNA1;IFNA13;IFNG;IGF1;RBPJ;IHH;IL1A;IL1B;IL2;IL2RA;IL2RB;IL4;IL6;IL…	6.17229	2.65607e-105
GOBP_HOMEOSTATIC_PROCESS	ADA;CDH3;BCL2L11;ABCB6;CDK6;ADAR;YAP1;CEBPA;CETP;CFTR;PPARGC1A;CLCN3;LRRK2;CCR1;CCR5;CCR7;CNR1;ADM;CPB2;CLDN4;CLDN3;DOCK11;MUC17;MAPK14;CSF1;CSF1R;CSK;CCN2;CTNNB1;CX3CR1;TTC39B;ACE;AKR1C1;DECR1;DIO2;DRD2;AGT;AGTR1;S1PR1;EDN1;EDNRA;EGR1;EPO;ERCC2;AKT1;ERCC6;ESRRB;ETS1;ALB;EZH2;F2;F2R;FGF2;FOXO1;FOXO3;AKR1B1;FMO2;SIRT1;SLC7A8;FSHB;NR5A2;GATA2;GATA3;GATM;GBA;MSTN;GHRHR;GJA1;ANG;ANGPT1;GPER1;CCDC22;M…	4.04583	1.01953e-103
GOBP_NEGATIVE_REGULATION_OF_MULTICELLULAR_ORGANISMAL_PROCESS	ADA;CDH3;CDK6;CDKN1B;CEBPA;SEMA3C;CXCL13;LILRB1;PHB2;CCR1;CCR7;CD200R1;ADM;CPB2;CRH;SIRPA;CSK;ADRA1A;CTLA4;CTNNB1;CX3CR1;DCN;ACE;DRD2;AGT;AGTR2;EDN1;EGFR;AHSG;EPHB2;ERBB2;EZH2;F2;F2R;F2RL1;FBN1;FGA;FGF2;KIFAP3;DKK1;FOXO1;FN1;DICER1;HEY1;NR5A1;PTPN22;GATA2;GATA3;GATA6;GBA;GREM1;MSTN;GJA1;FOXP1;IL37;TNFRSF21;PDCD4;HPGDS;GLI3;ANGPT1;ANGPT2;MYLIP;CD274;GSK3B;GSTP1;TBX21;ANXA1;ANXA2;HDAC1;HDAC2;HGF;HI…	4.91846	2.64081e-102
GOBP_REGULATION_OF_MULTICELLULAR_ORGANISMAL_DEVELOPMENT	ADA;CDH3;PDCD6;RASGRP1;PLXNC1;CDK6;CDKN1B;LILRB2;PAK4;YAP1;FST;CEBPA;SEMA3C;CIB1;CXCL13;CFL1;CFTR;HPSE;LILRB1;FCRL3;OSR2;H4-16;CCR1;ADM;CRABP2;CREB1;MAPK14;CSF1;CSF3;IL34;CCN2;CTLA4;CTNNB1;CX3CR1;CYP1B1;DCN;ACE;DRD2;AGT;DUSP6;S1PR1;EDN1;EGF;MEGF8;AHSG;EPHB2;ERBB2;AKT1;ETS1;EZH2;F2;F3;FANCD2;FBN1;FGF1;FGF2;FGF9;FGFR2;KIFAP3;DKK1;FOXO3;PLXND1;FLT1;PLCB1;FN1;DICER1;SIRT1;HEY1;FOS;LPAR3;IL27;MTOR;FSH…	4.28991	1.76046e-100
GOBP_POSITIVE_REGULATION_OF_GENE_EXPRESSION	CDKN2B-AS1;CDH3;KLRC4-KLRK1;RASGRP1;TOB1;CDK6;LILRB2;ADAR;NOD1;YAP1;CEBPA;AGR2;KHDRBS1;CTCF;CD226;HPSE;LILRB1;PPARGC1A;PHB2;CHUK;OSR2;LRRK2;CCR7;CLDN3;CRP;MAPK14;CSF1;CSF1R;CSF2;IL34;CCN2;CTNNB1;CYP1B1;CD55;DDX5;ARX;DLX5;DNMT1;DNMT3B;DRD2;AGT;EGF;EGFR;EGR1;AIF1;ELAVL1;ENO1;EPHB2;ERBB2;AKT1;ESR1;ETS1;F2R;F2RL1;F3;FCGR3A;FGF1;FGF2;FGF9;KLRK1;DKK1;PLCB1;FN1;SIRT1;HEY1;CADM1;IL27;MTOR;FSHB;NR5A1;GABP…	4.83928	3.24542e-100
GOBP_CYTOKINE_PRODUCTION	CDH3;KLRC4-KLRK1;RASGRP1;LILRB2;NOD1;CD226;HPSE;LILRB1;CHUK;LRRK2;CCR7;CD200R1;CRP;SIRPA;MAPK14;CSF1R;CSF2;CSK;CX3CR1;CYP1B1;CD55;DRD2;AGT;EGR1;AIF1;EPHB2;EZH2;F2;F2R;F2RL1;F3;FCGR3A;KLRK1;PLCB1;FN1;DICER1;SIRT1;CADM1;IL27;PTPN22;GATA3;GATA6;GBA;FOXP1;IL37;TNFRSF21;PDCD4;ANGPT1;CD274;GSTP1;TBX21;ANXA1;HDAC2;HGF;HIF1A;HK1;HLA-B;HLA-DPB1;HLA-DRB1;HLA-G;HMGB1;HSPD1;APOA2;IFNG;IFNGR1;IGF1;IL1A;IL1B;I…	5.95919	4.06598e-100
GOBP_CELLULAR_RESPONSE_TO_OXYGEN_CONTAINING_COMPOUND	BCL2L11;KLRC4-KLRK1;CDK4;LILRB2;NOD1;YAP1;CXCL13;POSTN;CFTR;LILRB1;CHRM3;PHB2;CHUK;LRRK2;CCR5;COL1A1;CPB2;CREB1;CRHR1;CRHR2;CRK;SIRPA;PARP1;MAPK14;CSF2;CSF3;CSK;CTNNB1;GPBAR1;CX3CR1;CYP1B1;CYP11A1;CD55;DAPK1;ACE;AKR1C1;AKR1C2;DNMT1;DNMT3A;DRD2;AGT;AGTR1;AGTR2;EDN1;EDNRA;EGFR;EGR1;AHR;AHSG;AIF1;EPHA3;EPHB2;AKT1;ESR1;ESR2;EZH2;FBN1;FGFR2;KLRK1;FOXO1;FOXO3;PLCB1;SIRT1;FOS;FPR2;SH3BP4;MTOR;GABPA;PTPN…	4.6212	1.25429e-96
GOBP_REGULATION_OF_CELL_DIFFERENTIATION	ADA;SRA1;RASGRP1;TOB1;PLXNC1;CDK6;CDKN1B;LILRB2;YAP1;FST;CARM1;CEBPA;SEMA3C;CIB1;OLFM4;CETP;LILRB1;FCRL3;CTHRC1;LRRK2;H4-16;CCR1;COL1A1;ADM;CRABP2;CREB1;CRK;CRP;PARP1;MAPK14;CSF1;CSF2;CSF3;IL34;CCN2;CTH;CTLA4;CTNNB1;ADRA2B;CX3CR1;ACE;DDX5;DNMT1;DPYSL2;DRD2;AGT;AGTR1;EDN1;MEGF8;EGFR;EPHA3;EPHB2;EPO;ERBB2;AKT1;ESRRB;ETS1;EZH2;F2;FANCD2;FBLN1;FBN1;FGA;FGF2;FGF9;FGFR2;ZHX2;KIFAP3;DKK1;FOXO1;FOXO3;PLX…	3.94747	8.58095e-96
GOBP_REGULATION_OF_CELL_ACTIVATION	ADA;KLRC4-KLRK1;RASGRP1;CDKN1A;LILRB2;CEBPA;CD226;LILRB1;FCRL3;LRRK2;CCR7;CNR1;SIRPA;CSK;CCN2;CTLA4;CTNNB1;CD55;DPP4;AHR;AIF1;EPHB2;EPO;ERBB2;AKT1;F2;F2RL1;FANCD2;FCGR3A;KLRK1;FOXO3;FN1;IL27;PTPN22;GATA2;GATA3;TNFRSF21;GLI3;GPER1;CD274;TBX21;ANXA1;HLA-DPB1;HLA-DQB1;HLA-DRB1;HLA-G;HMGB1;HSPD1;ID2;IFNG;IGF1;APOE;IHH;IL1A;IL1B;IL2;IL2RA;IL4;IL6;IL7;IL7R;IL10;IL12B;IL12RB1;IL13;IL15;IL18;IDO1;INHA;IN…	6.36627	2.93599e-95
GOBP_T_CELL_ACTIVATION	ADA;KLRC4-KLRK1;RASGRP1;CDK6;LILRB2;CCR9;LILRB1;CCR7;SIRPA;CSK;CTLA4;CTNNB1;CD55;DPP4;EGR1;AIF1;EPO;ERBB2;AKT1;F2RL1;FANCD2;KLRK1;FOXO3;CADM1;IL27;MTOR;PTPN22;GATA3;GBA;FOXP1;TNFRSF21;GLI3;CD274;TBX21;ANXA1;HLA-DPB1;HLA-DQB1;HLA-DRB1;HLA-G;HMGB1;HSPD1;ICAM1;IFNA1;IFNA13;IFNG;IGF1;IHH;IL1A;IL1B;IL2;IL2RA;IL4;IL6;IL7;IL7R;IL10;IL12B;IL12RB1;IL15;IL18;IDO1;KLRC1;ARG1;LEP;LEPR;LGALS1;LGALS3;LGALS9;LY…	7.69362	6.84012e-94
GOBP_IMMUNE_EFFECTOR_PROCESS	ADA;KLRC4-KLRK1;RASGRP1;NOD1;CD226;LILRB1;PHB2;FCRL3;CRK;DOCK11;CRP;CX3CR1;CD55;ACE;CFD;AHR;EPHB2;ERCC1;F2;F2RL1;FCGR3A;KLRK1;SIRT1;CADM1;IL27;MTOR;NCR3;PTPN22;GATA2;GATA3;FOXP1;ANGPT1;MSH6;TBX21;ANXA1;HCK;HK1;HLA-B;HLA-DPB1;HLA-DQB1;HLA-DRB1;HLA-G;HMGB1;HPRT1;HSPD1;APOA2;ICAM1;CFI;IFNA1;IFNA13;IFNG;IL1B;IL1R1;IL2;IL4;IL6;IL7R;IL9;IL10;IL12B;IL12RB1;IL13;IL17A;IL18;ITGAM;USP17L2;KIR2DL4;KIR3DL1;K…	6.35555	5.51505e-92
GOBP_INNATE_IMMUNE_RESPONSE	KLRC4-KLRK1;RASGRP1;ADAR;NOD1;CD226;LILRB1;PHB2;CHUK;CRK;CRP;SIRPA;PARP1;CSF1;CSF1R;IL34;CX3CR1;CD55;DAPK1;DEFB4A;CFD;DRD2;EDN1;AIF1;F2RL1;FCGR3A;FGA;KLRK1;FPR2;CADM1;IL27;NCR3;PTPN22;GATA3;ANG;GPER1;ANXA1;HCK;HK1;HLA-B;HLA-C;HLA-G;HMGB1;BIRC2;BIRC3;CFI;IFI27;IFIT1;IFNA1;IFNA13;IFNG;IFNGR1;APOE;TICAM2;IL1RAP;FASLG;IL4;IL12B;IL12RB1;IL17A;IL18;CXCL10;ISG20;ITGAM;JAK1;KIR2DL4;KIR3DL1;KLRC1;ARG1;LEP…	5.2105	4.92224e-90
GOBP_REGULATION_OF_PHOSPHORUS_METABOLIC_PROCESS	DNM1L;RASGRP1;CDKN1A;CDKN1B;LILRB2;CDKN2A;ADAR;CDKN3;CEBPA;CIB1;MTCO2P12;PPARGC1A;AKAP13;PHB2;FCRL3;CKS1B;LRRK2;CCR7;CLDN3;SIRPA;PARP1;CSF1;CSF1R;CSF2;CSF3;CSK;IL34;ADRA1A;CCN2;ADRA2B;CX3CR1;ACE;DRD2;AGT;HBEGF;DUSP1;DUSP6;AGTR2;EDN1;EGF;EGFR;EGR1;AIF1;ENO1;EPHA3;EPHB2;EPHB4;EPO;ERBB2;AKT1;ERCC6;EZH2;F2;FBLN1;FGF1;FGF2;FGF9;FGFR2;DKK1;FLT1;FN1;SIRT1;FPR2;NUP62;MTOR;PTPN22;GBA;GREM1;MSTN;GH1;PDCD4;…	4.0826	6.61282e-90
GOBP_REGULATION_OF_LOCOMOTION	ADA;CDKN2B-AS1;MIR543;PDCD6;KLRC4-KLRK1;DNM1L;PLXNC1;CDK6;SEMA3C;CIB1;OLFM4;CXCL13;LRRK2;CCR1;CCR7;COL1A1;CD200R1;CLDN4;CLDN3;CLDN7;CRK;MAPK14;CSF1;CSF1R;CSF2;IL34;CX3CR1;CYP1B1;CYP19A1;DCN;ACE;DPP4;DRD2;AGT;HBEGF;DUSP1;AGTR2;S1PR1;EDN1;EGF;MEGF8;EGFR;AIF1;EPHB2;AKT1;ETS1;F2R;F2RL1;F3;FBLN1;FGF1;FGF2;FGF9;KLRK1;FOXO3;PLXND1;FLT1;PLCB1;FN1;SIRT1;CAPN7;FPR2;DAPK2;MTOR;FSHB;GATA2;GATA3;GREM1;MSTN;GJ…	4.59067	4.54281e-89
GOBP_POSITIVE_REGULATION_OF_CATALYTIC_ACTIVITY	CDH3;PDCD6;BCL2L11;RASGRP1;CDKN1A;CDKN1B;NOD1;CIB1;CXCL13;AKAP13;PHB2;FCRL3;CKS1B;LRRK2;CCR7;CLDN4;CLDN3;CRHR1;CRK;DOCK11;MAPK14;CSF1;CSF1R;CSK;IL34;ADRA1A;CCN2;CTNNB1;ADRA2B;DAPK1;ACE;DRD2;AGT;HBEGF;AGTR1;AGTR2;S1PR1;EDN1;EDNRA;EGF;EGFR;EGR1;EPHA3;EPHB2;EPHB4;EPO;ERBB2;AKT1;ERCC6;ESR1;EZH2;F2;F2R;F2RL1;F3;FBLN1;FGF1;FGF2;FGFR2;DKK1;FLT1;FN1;SIRT1;MTOR;FSHR;GREM1;GDNF;GH1;GHRHR;ANG;ANGPT1;GPER1;G…	4.4401	1.24274e-88
GOBP_CIRCULATORY_SYSTEM_DEVELOPMENT	PDCD6;CDKN1A;CDKN1B;PAK4;YAP1;SEMA3C;CIB1;CXCL13;PDLIM5;HPSE;AKAP13;COL1A1;ADM;CREB1;MAPK14;ADRA1A;CCN2;CTH;CTNNB1;ADRA2B;CX3CR1;CYP1B1;DCN;ACE;DLX3;DNMT1;AGT;DUSP6;AGTR1;S1PR1;EDN1;EDNRA;EGF;MEGF8;EGFR;EGR1;AHR;EPHB2;EPHB4;EPOR;ERBB2;AKT1;ETS1;F3;FBN1;FGF1;FGF2;FGF9;FGFR2;DKK1;NCOA6;FOXO1;PLXND1;FLT1;FN1;SIRT1;HEY1;MTOR;GATA2;GATA3;GATA6;GREM1;GJA1;ANKRD1;FOXP1;CACYBP;PDCD4;GLI1;GLI3;ANG;CXCR3;A…	4.39574	3.21013e-88
GOBP_POSITIVE_REGULATION_OF_CYTOKINE_PRODUCTION	KLRC4-KLRK1;RASGRP1;LILRB2;NOD1;CD226;HPSE;LILRB1;CHUK;LRRK2;CCR7;MAPK14;CSF1R;CSF2;CYP1B1;CD55;DRD2;AGT;EGR1;AIF1;EPHB2;F2R;F2RL1;F3;FCGR3A;KLRK1;PLCB1;SIRT1;CADM1;IL27;PTPN22;GATA3;GATA6;FOXP1;CD274;TBX21;ANXA1;HDAC2;HGF;HIF1A;HK1;HLA-DPB1;HLA-G;HMGB1;HSPD1;APOA2;IFNG;IFNGR1;IL1A;IL1B;IL1R1;IL1RAP;IL2;IL4;IL6;IL7;IL9;IL10;IL12B;IL12RB1;IL13;IL15;IL16;IL17A;IL18;IDO1;KIR2DL4;LEP;LGALS9;LTA;ARNT;…	7.98859	7.05888e-88
GOBP_IMMUNE_SYSTEM_DEVELOPMENT	ADA;BCL2L11;RASGRP1;CDK6;LILRB2;ADAR;FST;CEBPA;CIB1;CCR9;LILRB1;FCRL3;H4-16;CCR1;CCR7;CREB1;DOCK11;PARP1;MAPK14;CSF1;CSF1R;CSF2;CSF3;IL34;CTLA4;CTNNB1;ACE;EGR1;EPO;EPOR;ERBB2;ERCC1;ERCC2;ETS1;EZH2;F2RL1;FANCD2;FBN1;FGFR2;NCOA6;FOXO3;FLT1;SIRT1;FOS;IL27;MTOR;FSHB;GABPA;PTPN22;GATA2;GATA3;GBA;FOXP1;GLI3;ANGPT1;CD274;MSH6;TMOD3;TBX21;SLC40A1;ANXA1;ANXA2;HIF1A;HLA-B;HLA-DRB1;HLA-G;HMGB1;HOXB4;HSPD1;I…	4.77817	5.98805e-87
GOBP_POSITIVE_REGULATION_OF_DEVELOPMENTAL_PROCESS	ADA;PDCD6;DNM1L;RASGRP1;PLXNC1;LILRB2;PAK4;YAP1;FST;CARM1;CEBPA;CIB1;AGR2;OLFM4;CFL1;CFTR;HPSE;PPARGC1A;CTHRC1;OSR2;CCR1;COL1A1;ADM;CRABP2;CREB1;CRK;PARP1;MAPK14;CSF1;CSF2;CSF3;IL34;CCN2;CTH;CTNNB1;ADRA2B;CX3CR1;CYP1B1;DCN;ACE;ARX;DRD2;AGT;AGTR1;AGTR2;EDN1;EGF;MEGF8;EPHB2;EPO;AKT1;ESRRB;ETS1;EZH2;F3;FGA;FGF1;FGF2;FGF9;FGFR2;DKK1;FOXO3;PLXND1;FLT1;PLCB1;NEDD4L;FN1;DICER1;SIRT1;FOS;LPAR3;MTOR;NR5A1…	4.04952	1.15997e-86
GOBP_TUBE_DEVELOPMENT	ADA;PDCD6;BCL2L11;PAK4;YAP1;CEBPA;SEMA3C;CIB1;AGR2;CXCL13;HPSE;PHB2;CTHRC1;ADM;CREB1;CRH;MAPK14;CSF1;CSF1R;CCN2;CTNNB1;ADRA2B;CX3CR1;CYP1A1;CYP1A2;CYP1B1;DCN;ACE;AGT;AGTR1;AGTR2;S1PR1;EDN1;EDNRA;EGF;MEGF8;EGFR;EMX2;EPHB2;EPHB4;ERBB2;AKT1;ESR1;ETS1;F3;FGF1;FGF2;FGF9;FGFR2;AKR1B1;PLXND1;FLT1;FN1;SIRT1;HEY1;GATA2;GATA3;GATA6;GREM1;GDNF;GJB2;FOXP1;INTU;GLI1;GLI3;ANG;CXCR3;ANGPT1;ANGPT2;NR3C1;ANXA1;AN…	4.45489	1.93593e-86
GOBP_CELL_CELL_SIGNALING	CDH3;ABCC4;LILRB2;YAP1;CXCL13;CFTR;LILRB1;UTS2;PRRT2;CHRM3;UCN3;CTHRC1;CLCN3;LRRK2;CCR1;CCR5;CNR1;COL1A1;ADM;CREB1;CRH;CRHR1;CRHR2;MAPK14;ADRA1A;CTNNB1;ADRA2B;CX3CR1;CYP19A1;ACE;DLX3;DLX5;DRD2;AGT;AGTR1;EDN1;EDNRA;EGF;EGFR;EGR1;EPHB2;AKT1;ESR2;EZH2;F2R;F2RL1;FGA;FGF2;FGF9;FGFR2;DKK1;FOXO1;FOXO3;PLCB1;LPAR3;FJX1;RNF19A;GATA3;GATA6;GREM1;GDNF;AMH;GHRH;GHRHR;GJA1;GJB2;RBMS3;GLI1;GLI3;GNRH1;GNRHR;GPE…	3.68188	2.42114e-86
GOBP_NEUROGENESIS	UST;PLXNC1;CDK6;PAK4;NDRG1;YAP1;CARM1;SEMA3C;CIB1;PDLIM5;CFL1;MMP24;CTHRC1;LRRK2;CNR1;ADM;CRABP2;CREB1;CRK;CRMP1;CSF1;CSF1R;CSK;IL34;CTNNB1;ADRA2B;CX3CR1;ACE;ARX;DLX3;DLX5;DNMT3A;DPYSL2;DRD2;AGT;S1PR1;EDN1;EDNRA;MEGF8;EMX2;EPHA3;EPHB2;EPHB4;EPO;NR2F6;ERBB2;ERCC2;AKT1;ERCC6;EZH2;F2;FGF2;FGFR2;FKBP4;ZHX2;KIFAP3;DKK1;FOXO3;PLXND1;ASTN2;NEDD4L;FN1;DICER1;HEY1;LPAR3;MTOR;CHD5;GATA2;GATA3;GBA;GDNF;TNFR…	3.67255	1.7165e-85
GOBP_NEGATIVE_REGULATION_OF_SIGNALING	ADA;PDCD6;TOB1;LILRB2;ADAR;YAP1;FST;CIB1;PHB2;FCRL3;CTHRC1;LRRK2;ADM;CRH;SIRPA;MAPK14;CSF2;CSK;ADRA1A;CTH;CTNNB1;CX3CR1;CYP26A1;DCN;DRD2;AGT;DUSP1;DUSP2;DUSP6;AGTR2;EDN1;MEGF8;EGFR;EGR1;AHSG;ENO1;EPHB2;EPO;AKT1;ESR1;EZH2;F2RL1;FBLN1;FBN1;FGA;FGF2;FGF9;DKK1;FOXM1;FOXO1;FOXO3;SIRT1;HEY1;NUP62;SH3BP4;MTOR;PTPN22;GATA2;GATA3;GBA;GREM1;MSTN;GDNF;GJA1;FOXP1;PDCD4;RBMS3;GLI1;GLI3;GPER1;CCDC22;GSK3B;GSTP…	3.95194	3.37393e-85
GOBP_CELLULAR_RESPONSE_TO_ENDOGENOUS_STIMULUS	SRA1;BCL2L11;TOB1;CDK4;NOD1;YAP1;FST;CARM1;CIB1;CXCL13;CFTR;BRD8;CHRM3;PHB2;UCN3;LRRK2;COL1A1;CRHR1;CRHR2;CRK;PARP1;CSF1;CSK;CCN2;CTNNB1;CX3CR1;CYP1B1;CYP11A1;ACE;AKR1C1;AKR1C2;DDX5;DLX3;DLX5;DNMT1;DNMT3A;AGRP;DRD2;AGT;AGTR1;AGTR2;EDN1;EDNRA;MEGF8;EGFR;EGR1;AHR;AHSG;AIF1;EPHB2;ERBB2;AKT1;ESR1;ESR2;ESRRB;EZH2;FBN1;FGF1;FGF2;FGF9;FGFR2;FKBP4;DKK1;FOXO1;FOXO3;PLCB1;SIRT1;FOS;FPR2;SH3BP4;MTOR;FSHB;FS…	3.99692	5.64194e-85
GOBP_POSITIVE_REGULATION_OF_CELL_ADHESION	ADA;KLRC4-KLRK1;RASGRP1;CDK6;LILRB2;CIB1;AGR2;OLFM4;CXCL13;LILRB1;CCR7;CRK;SIRPA;CSF1;CSK;CCDC80;CD55;DPP4;AIF1;EPO;ERBB2;AKT1;ETS1;FGA;KLRK1;KIFAP3;FOXO3;FN1;ALOX15;ABI3BP;POLDIP2;PTPN22;GATA3;GLI3;ANGPT1;CD274;GSK3B;ANXA1;HLA-DPB1;HLA-DQB1;HLA-DRB1;HLA-G;HMGB1;FOXA2;HSPD1;IFNG;IGF1;CCN1;IHH;IL1A;IL1B;IL2;IL2RA;IL4;IL6;IL7;IL7R;IL10;IL12B;IL12RB1;IL15;IL18;ILK;ITGA2;ITGA5;ITGAV;ITGB3;JAK1;KDR;LA…	7.79532	7.09942e-85
GOBP_ANATOMICAL_STRUCTURE_FORMATION_INVOLVED_IN_MORPHOGENESIS	ADA;PDCD6;BCL2L11;PAK4;MYL9;YAP1;CDX1;SEMA3C;CIB1;CXCL13;CFTR;HPSE;AKAP13;CTHRC1;COL1A1;ADM;MAPK14;CCN2;CTNNB1;ADRA2B;CX3CR1;CYP1B1;CYP19A1;DCN;ACE;DLX5;AGT;DUSP1;DUSP2;AGTR1;S1PR1;EDN1;EDNRA;EGF;EPHB2;EPHB4;ERBB2;ERCC1;ERCC2;AKT1;ETS1;F3;FGF1;FGF2;FGF9;FGFR2;DKK1;PLXND1;FLT1;FN1;DICER1;SIRT1;HEY1;FJX1;GABPA;LMOD1;GATA2;GATA3;GATA6;GBA;GREM1;GDNF;GJA1;ANKRD1;GLI3;ANG;CXCR3;ANGPT1;ANGPT2;TMOD3;SLC…	4.19978	1.19478e-83
GOBP_POSITIVE_REGULATION_OF_INTRACELLULAR_SIGNAL_TRANSDUCTION	ADA;BCL2L11;DNM1L;RASGRP1;NOD1;CIB1;HPSE;AKAP13;PHB2;CHUK;FCRL3;LRRK2;CCR1;CCR7;CRK;CSF1;CSF1R;CSF3;CSK;IL34;ADRA1A;CCN2;CTH;CTNNB1;ADRA2B;GPBAR1;CX3CR1;DCN;AKR1C2;DDX5;DRD2;AGT;HBEGF;EDN1;EGF;EGFR;EPO;ERBB2;EZH2;F2;F2R;F2RL1;F3;FGA;FGF1;FGF2;FGFR2;DKK1;FLT1;PLCB1;FN1;SIRT1;LPAR3;FPR2;NUP62;ALOX15;FSHR;CHD5;PTPN22;GATA3;GREM1;GH1;GJA1;ANKRD1;PDCD4;ANGPT1;GPER1;CCDC22;HGF;HLA-DRB1;HMGB1;BIRC2;BIRC…	4.67559	4.77339e-83
GOBP_CYTOKINE_MEDIATED_SIGNALING_PATHWAY	LILRB2;ADAR;YAP1;CEBPA;CIB1;CXCL13;CXCR6;CCR9;LILRB1;CHUK;CCR1;CCR5;CCR7;CCR8;CSF1;CSF1R;CSF2;CSF3;IL34;CX3CR1;DOK1;EDN1;EGR1;EPO;EPOR;AKT1;F2RL1;F3;FOXO3;PLCB1;SIRT1;IL37;CXCR3;ANGPT1;CXCL1;GSTP1;HCK;HIF1A;BIRC2;BIRC3;IFI27;IFNA1;IFNA13;IFNG;IFNGR1;TICAM2;FAS;IL1A;IL1B;IL1R1;IL1RAP;IL1RN;IL2RA;IL2RB;IL6;IL7;IL7R;CXCL8;CXCR1;CXCR2;IL12B;IL12RB1;IL15;IL17A;IL18;ILK;CXCL10;JAK1;ARG1;LEP;LEPR;LYN;MI…	7.47596	1.37767e-82
GOBP_REGULATION_OF_PROTEIN_MODIFICATION_PROCESS	PDCD6;RASGRP1;CDKN1A;CDKN1B;LILRB2;CDKN2A;ADAR;CDKN3;CEBPA;CIB1;CTCF;PPARGC1A;AKAP13;PHB2;FCRL3;CKS1B;LRRK2;CCR7;CLDN3;SIRPA;CSF1;CSF1R;CSF2;CSF3;CSK;IL34;ADRA1A;CCN2;CTNNB1;ADRA2B;CX3CR1;ACE;DNMT1;DNMT3B;DRD2;AGT;HBEGF;DUSP1;DUSP6;AGTR2;EDN1;EGF;EGFR;EGR1;AIF1;EPHB2;EPO;ERBB2;AKT1;ERCC6;EZH2;F2;FBLN1;FGF1;FGF2;FGF9;DKK1;FLT1;FN1;SIRT1;FPR2;NUP62;MTOR;PTPN22;GATA2;GATA3;GBA;GREM1;MSTN;GH1;PDCD4;A…	3.68574	3.97138e-82
GOBP_REGULATION_OF_CELL_CELL_ADHESION	ADA;KLRC4-KLRK1;RASGRP1;LILRB2;CXCL13;LILRB1;CCR7;SIRPA;MAPK14;CSK;CTLA4;CD55;DPP4;AIF1;EPO;ERBB2;AKT1;ETS1;FGA;KLRK1;KIFAP3;FOXO3;PTPN22;GATA3;TNFRSF21;GLI3;CD274;TBX21;ANXA1;HLA-DPB1;HLA-DQB1;HLA-DRB1;HLA-G;HMGB1;FOXA2;HSPD1;IFNG;IGF1;IHH;IL1A;IL1B;IL1RN;IL2;IL2RA;IL4;IL6;IL7;IL7R;IL10;IL12B;IL12RB1;IL15;IL18;IDO1;JAK1;ARG1;LEP;LGALS1;LGALS3;LGALS9;LYN;MIR141;MIR181C;MIR21;MIR31;EPCAM;MDK;KITLG…	7.31823	7.55282e-80
GOBP_POSITIVE_REGULATION_OF_PROTEIN_METABOLIC_PROCESS	PDCD6;BCL2L11;RASGRP1;TOB1;CDKN1A;CDKN1B;LILRB2;NOD1;CEBPA;CIB1;KHDRBS1;PPARGC1A;AKAP13;PHB2;FCRL3;CKS1B;LRRK2;CCR7;CLDN4;CLDN3;CSF1;CSF1R;CSF2;CSF3;CSK;IL34;ADRA1A;CCN2;CTNNB1;ADRA2B;CX3CR1;CYP1B1;DAPK1;ACE;DNMT1;DNMT3B;DRD2;AGT;HBEGF;AGTR1;AGTR2;EDN1;EGF;EGFR;EGR1;AIF1;ELAVL1;ENO1;EPO;ERBB2;AKT1;ERCC6;EZH2;F2;F2R;F3;FBLN1;FGF1;FGF2;FGF9;DKK1;FOXO1;FLT1;PLCB1;FN1;SIRT1;FPR2;MTOR;RNF19A;PTPN22;GA…	3.67955	5.28417e-79
GOBP_REGULATION_OF_PROTEIN_PHOSPHORYLATION	RASGRP1;CDKN1A;CDKN1B;CDKN2A;ADAR;CDKN3;CEBPA;CIB1;AKAP13;PHB2;CKS1B;LRRK2;CCR7;CLDN3;SIRPA;CSF1;CSF1R;CSF2;CSF3;CSK;IL34;ADRA1A;CCN2;ADRA2B;CX3CR1;ACE;DRD2;AGT;HBEGF;DUSP1;DUSP6;EDN1;EGF;EGFR;EGR1;AIF1;EPHB2;EPO;ERBB2;AKT1;ERCC6;EZH2;F2;FBLN1;FGF1;FGF2;FGF9;DKK1;FLT1;FN1;SIRT1;FPR2;NUP62;MTOR;PTPN22;GBA;GREM1;MSTN;GH1;PDCD4;ANG;ANGPT1;GPER1;GSTP1;GTF2H1;HDAC2;HGF;HLA-DRB1;BIRC5;IFNA1;IFNA13;IFNG…	4.26674	2.18668e-78
GOBP_VESICLE_MEDIATED_TRANSPORT	PDCD6;DNM1L;RASGRP1;ABCC4;OLFM4;CFTR;LILRB1;PRRT2;CLCN3;LRRK2;CCR1;CNR1;ADM;CRP;SIRPA;CSK;ADRA1A;CNIH3;CTNNB1;DPP4;DPYSL2;DRD2;EGF;AHSG;AIF1;EPHA3;EPHB2;F2RL1;FCGR3A;FGA;DKK1;NEDD4L;FPR2;SH3BP4;ALOX15;GATA2;GREM1;GH1;INTU;ANGPT1;ANK1;CCDC22;GSK3B;ANXA1;ANXA2;HCK;HMGB1;APOA2;CFI;IFNG;APOE;IGF1R;TICAM2;IL1B;IL2RB;IL4;CXCL8;CXCR1;CXCR2;IL13;IL15;INSR;ITGA2;ITGAM;ITGAV;ITGB1;ITGB3;RHOG;LEP;LEPR;LGALS…	3.54222	7.67417e-78
GOBP_LEUKOCYTE_MIGRATION	ADA;KLRC4-KLRK1;DNM1L;OLFM4;CXCL13;CCR1;CCR5;CCR7;CD200R1;CRK;SIRPA;CSF1;CSF1R;IL34;CX3CR1;CYP19A1;DPP4;DUSP1;S1PR1;EDN1;AIF1;AKT1;F2RL1;KLRK1;FLT1;PLCB1;FPR2;DAPK2;GATA3;GBA;GREM1;MSTN;CXCR3;CXCL1;TBX21;ANXA1;HCK;HMGB1;ICAM1;IL1A;IL1B;IL1R1;IL4;IL6;CXCL8;CXCR1;CXCR2;IL10;IL16;IL17A;CXCL10;ITGA2;ITGB1;ITGB3;RHOG;LEP;LGALS3;LGALS9;LYN;MDK;KITLG;MIF;CXCL9;MMP2;MMP9;MMP14;CD200;NINJ1;SERPINE1;IL23A;…	8.46756	1.11577e-77
GOBP_LEUKOCYTE_CELL_CELL_ADHESION	ADA;KLRC4-KLRK1;RASGRP1;LILRB2;LILRB1;CCR7;SIRPA;CSK;CTLA4;CX3CR1;CD55;DPP4;AIF1;EPO;ERBB2;AKT1;ETS1;KLRK1;FOXO3;PTPN22;GATA3;TNFRSF21;GLI3;CD274;TBX21;ANXA1;HLA-DPB1;HLA-DQB1;HLA-DRB1;HLA-G;HMGB1;HSPD1;ICAM1;IFNG;IGF1;IHH;IL1A;IL1B;IL2;IL2RA;IL4;IL6;IL7;IL7R;IL10;IL12B;IL12RB1;IL15;IL18;IDO1;ITGA5;ITGB1;ARG1;LEP;LGALS1;LGALS3;LGALS9;LYN;MIR141;MIR181C;MIR21;MIR31;MDK;KITLG;MYB;NT5E;FOXP3;IL23A;P…	8.14601	3.93966e-77
GOBP_EPITHELIUM_DEVELOPMENT	CDH3;CDK6;CDKN1B;YAP1;CDX1;FST;CEBPA;SEMA3C;AGR2;TXNIP;HPSE;PHB2;CTHRC1;ADM;CLDN3;CREB1;CSF1;CSF1R;CTNNB1;CYP1A1;AKR1C1;AKR1C2;ARX;DLX3;DLX5;AGT;HBEGF;AGTR2;S1PR1;EDN1;EDNRA;EGF;MEGF8;EGFR;ERCC2;AKT1;ESR1;EZH2;F2RL1;FGF1;FGF2;FGFR2;DKK1;AKR1B1;PLXND1;PLCB1;ASTN2;HEY1;MTOR;NR5A2;NR5A1;GATA2;GATA3;GATA6;GREM1;GDNF;GJA1;FOXP1;INTU;GLI1;GLI3;NR3C1;GSK3B;SLC40A1;ANXA1;HDAC1;HDAC2;HGF;HIF1A;HOXA11;HOXA…	4.05982	4.87311e-77
GOBP_TAXIS	KLRC4-KLRK1;DNM1L;PLXNC1;SEMA3C;CXCL13;CXCR6;CCR9;CCR1;CCR5;CCR7;CCR8;CRK;CRMP1;MAPK14;CSF1;CSF1R;IL34;CX3CR1;CYP19A1;DEFB4A;ARX;DLX5;DPP4;DPYSL2;HBEGF;DUSP1;AGTR1;S1PR1;EDN1;EDNRA;MEGF8;AIF1;EPHA3;EPHB2;EPHB4;ERBB2;F2RL1;F3;FGF1;FGF2;KLRK1;PLXND1;FLT1;FPR1;FPR2;DAPK2;GATA3;GREM1;MSTN;GDNF;GLI3;CXCR3;ANGPT1;ANGPT2;CXCL1;ANXA1;HGF;HMGB1;NR4A1;CCN1;IL1B;IL4;IL6;CXCL8;CXCR1;CXCR2;IL10;IL16;CXCL10;IT…	6.00788	5.44111e-77
GOBP_POSITIVE_REGULATION_OF_TRANSPORT	CDH3;DNM1L;CIB1;KHDRBS1;CETP;CFTR;PRRT2;UCN3;LRRK2;CCR1;CNR1;CPB2;CREB1;CRH;SIRPA;MAPK14;CYP19A1;DRD2;AGT;EDN1;EDNRA;EGF;AHSG;EPHB2;ERBB2;AKT1;F2;F2R;F2RL1;FGA;NEDD4L;SIRT1;FPR2;GATA2;GREM1;GDNF;GH1;GHRH;GHRHR;ANKRD1;GLI3;ANG;ANGPT1;GPER1;GSK3B;GSTM2;ANXA1;ANXA2;HIF1A;HLA-DRB1;APOA2;IFNG;IGF1;APOE;IL1A;IL1B;FASLG;IL2RB;IL4;AQP1;IL13;IL15;INHA;INHBA;CXCL10;INSR;ITGA2;ITGAM;ITGB1;KCNQ1;KISS1;LEP;LG…	4.75667	6.97051e-77
GOBP_POSITIVE_REGULATION_OF_IMMUNE_RESPONSE	ADA;KLRC4-KLRK1;RASGRP1;KHDRBS1;CD226;LILRB1;PHB2;FCRL3;CCR7;CNR1;CSK;CTLA4;CD55;CFD;F2RL1;KLRK1;SIRT1;FPR1;FPR2;CADM1;NCR3;PTPN22;GATA2;GATA3;FOXP1;TNFRSF21;CD274;TBX21;ANXA1;HCK;HLA-B;HLA-DPB1;HLA-DQB1;HLA-DRB1;HLA-G;HMGB1;HSPD1;CFI;IFNG;IL1B;IL1R1;IL2;IL4;IL6;IL10;IL12B;IL12RB1;IL13;IL15;IL17A;IL18;IDO1;ITGAM;KIR2DL4;LGALS3;LGALS9;LIMK1;LTA;LYN;SH2D1A;MIR21;MIR34A;MBL2;MLH1;MMP12;MSH2;MYB;PAK1…	6.12317	2.00503e-76
GOBP_REGULATION_OF_DEFENSE_RESPONSE	ADA;KLRC4-KLRK1;RASGRP1;ADAR;NOD1;CEBPA;CD226;LILRB1;LRRK2;CCR7;CNR1;CD200R1;CRK;SIRPA;PARP1;MAPK14;CYP19A1;ACE;DRD2;AGT;AGTR1;AHSG;EPHB2;ESR1;ETS1;F2RL1;FANCD2;KLRK1;FPR2;CADM1;ALOX15;IL27;NCR3;PTPN22;GATA3;GATA6;GBA;FOXP1;IL37;PDCD4;GPER1;GPX4;GSTP1;ANXA1;HCK;HGF;HLA-B;HLA-DRB1;HLA-G;HMGB1;BIRC2;BIRC3;TNC;IFIT1;IFNG;IGF1;APOE;IL1B;IL1R1;IL2;IL2RA;IL4;IL6;IL10;IL12B;IL12RB1;IL13;IL15;IL16;IL17A;…	5.59713	6.5636e-76
GOBP_POSITIVE_REGULATION_OF_MACROMOLECULE_BIOSYNTHETIC_PROCESS	SRA1;MED16;TOB1;YAP1;CDX1;CARM1;CEBPA;KHDRBS1;CTCF;LILRB1;PPARGC1A;BRD8;CHUK;OSR2;LRRK2;CCR7;COL1A1;CREB1;PARP1;MAPK14;CSF3;CTNNB1;CYP1B1;DCN;DLX3;DLX5;DRD2;AGT;AGTR2;S1PR1;EDN1;EGF;EGFR;EGR1;AHR;ELAVL1;TET3;EPO;ERBB2;ERCC1;AKT1;ERCC6;ESR1;ESR2;ESRRB;ETS1;F2R;F2RL1;FGF1;FGF2;FGFR2;FOXM1;NCOA6;FOXO1;FOXO3;PLCB1;SIRT1;HEY1;FOS;NUP62;MTOR;FSHB;NR5A2;NR5A1;GABPA;GATA2;GATA3;GATA6;GREM1;MSTN;GDNF;FOXD…	3.24951	7.50306e-76
GOBP_LEUKOCYTE_DIFFERENTIATION	ADA;RASGRP1;CDK6;LILRB2;CEBPA;CCR9;LILRB1;FCRL3;CCR1;CCR7;CREB1;DOCK11;PARP1;MAPK14;CSF1;CSF1R;CSF2;CSF3;IL34;CTLA4;CTNNB1;EGR1;ERBB2;EZH2;F2RL1;FANCD2;FBN1;FOXO3;SIRT1;FOS;IL27;MTOR;FSHB;PTPN22;GATA2;GATA3;GBA;FOXP1;GLI3;TBX21;ANXA1;ANXA2;HLA-B;HLA-DRB1;HLA-G;HMGB1;IAPP;ID2;IFNA1;IFNA13;IFNG;RBPJ;IHH;IL1A;IL1B;IL2;IL2RA;IL4;IL6;IL7;IL7R;IL9;IL10;IL11;IL12B;IL12RB1;IL15;IL17A;IL18;INHA;INHBA;ITGB…	6.09445	1.82709e-75
GOBP_REGULATION_OF_LYMPHOCYTE_ACTIVATION	ADA;KLRC4-KLRK1;RASGRP1;CDKN1A;LILRB2;LILRB1;FCRL3;CCR7;SIRPA;CSK;CTLA4;CTNNB1;CD55;DPP4;AHR;AIF1;EPHB2;EPO;ERBB2;AKT1;FANCD2;FCGR3A;KLRK1;FOXO3;IL27;PTPN22;GATA3;TNFRSF21;GLI3;CD274;TBX21;ANXA1;HLA-DPB1;HLA-DQB1;HLA-DRB1;HLA-G;HMGB1;HSPD1;ID2;IFNG;IGF1;IHH;IL1A;IL1B;IL2;IL2RA;IL4;IL6;IL7;IL7R;IL10;IL12B;IL12RB1;IL13;IL15;IL18;IDO1;INHA;INHBA;KLRC1;ARG1;LEP;LGALS1;LGALS3;LGALS9;LYN;MIR181C;MIR21;…	6.27732	9.63923e-75
GOBP_MAPK_CASCADE	RASGRP1;PAK4;NOD1;CIB1;AKAP13;PHB2;FCRL3;LRRK2;CCR1;CCR5;CCR7;CRK;SIRPA;MAPK14;CSF1R;CSK;IL34;ADRA1A;CCN2;CTNNB1;ADRA2B;GPBAR1;DRD2;AGT;DUSP1;DUSP2;DUSP6;EDN1;EGF;EGFR;EPHB2;EPO;ERBB2;ERCC6;EZH2;F2R;F2RL1;FBLN1;FGA;FGF1;FGF2;FGFR2;DKK1;FOXM1;FOXO1;FLT1;PLCB1;FN1;LPAR3;FPR2;NUP62;ALOX15;FSHR;PTPN22;GBA;GREM1;GH1;PDCD4;ANGPT1;GPER1;GSTP1;HGF;HLA-DRB1;HMGB1;IAPP;ICAM1;IGF1;APOE;IGF1R;IGFBP3;IGFBP6;C…	4.96434	3.16266e-73
GOBP_RESPONSE_TO_BACTERIUM	KLRC4-KLRK1;CDK4;LILRB2;NOD1;CXCL13;LILRB1;CCR5;CCR7;CNR1;ADM;CLDN3;CRP;SIRPA;MAPK14;CSF1;CSF2;CSF3;CCDC80;CX3CR1;CYP1A1;CD55;ACE;DEFB4A;CFD;DIO2;EDN1;EPHB2;EPO;AKT1;F2;F2R;F2RL1;FGA;FGFR2;FKBP5;KLRK1;FOS;FPR2;IL27;PTPN22;GJB2;ANKRD1;FOXP1;IL37;PDCD4;ANG;CD274;CXCL1;GSTP1;HCK;HDAC2;HLA-B;HLA-DRB1;HMGB1;NR4A1;HP;HPGD;RBPJ;TICAM2;IL1A;IL1B;FASLG;IL6;IL7R;CXCL8;AQP1;IL10;IL12B;IL13;IL17A;IL18;IDO1;C…	5.01044	5.49366e-73
GOBP_VASCULATURE_DEVELOPMENT	PDCD6;PAK4;YAP1;SEMA3C;CIB1;CXCL13;HPSE;COL1A1;ADM;MAPK14;CCN2;CTH;CTNNB1;ADRA2B;CX3CR1;CYP1B1;DCN;ACE;DLX3;DNMT1;AGT;AGTR1;S1PR1;EDN1;EDNRA;EGF;MEGF8;EGR1;AHR;EPHB2;EPHB4;ERBB2;AKT1;ETS1;F3;FGF1;FGF2;FGF9;FGFR2;FOXO1;PLXND1;FLT1;FN1;SIRT1;HEY1;GATA2;GATA6;GREM1;PDCD4;GLI3;ANG;CXCR3;ANGPT1;ANGPT2;GPER1;ANXA1;ANXA2;HGF;HIF1A;HLA-G;NR4A1;HOXA13;HPGD;APOE;CCN1;RBPJ;IHH;IL1A;IL1B;FASLG;IL6;CXCL8;CXCR…	4.85024	1.66283e-72
GOBP_RESPONSE_TO_HORMONE	SRA1;BCL2L11;CDK4;CDKN1B;YAP1;CARM1;TXNIP;BRD8;PHB2;UCN3;CCR7;COL1A1;ADM;CLDN4;CREB1;CRHR1;CRHR2;CRK;PARP1;MAPK14;CSF1;CSK;ADRA1A;CCN2;CYP1B1;CYP11A1;ACE;AKR1C1;AKR1C2;DDX5;AGRP;AGT;AGTR1;AGTR2;EDN1;EDNRA;EGR1;AHSG;AIF1;EPO;AKT1;ESR1;ESR2;ESRRB;FBN1;FKBP4;NCOA6;FOXO1;FOXO3;PLCB1;SIRT1;FOS;MTOR;FSHR;NR5A2;NR5A1;GATA3;GATA6;GBA;MSTN;GH1;GHRHR;GJB2;FOXP1;GLI3;GNRH1;GNRHR;ANG;GPER1;NR3C1;GSK3B;GTF2H1…	4.69542	3.38497e-72
GOBP_REGULATION_OF_HYDROLASE_ACTIVITY	PDCD6;BCL2L11;KLRC4-KLRK1;RASGRP1;PLXNC1;NOD1;CXCL13;PHB2;FCRL3;LRRK2;CCR7;CLDN4;CLDN3;CRK;DOCK11;ADRA1A;CCN2;DAPK1;DRD2;AGT;AGTR1;AGTR2;S1PR1;EDNRA;EGFR;AHSG;EPHA3;ERBB2;AKT1;ESR1;EZH2;F2R;F2RL1;F3;FBLN1;FGF2;FGFR2;KLRK1;PLXND1;FLT1;FN1;SIRT1;SH3BP4;MTOR;POLDIP2;ANG;GPER1;GSK3B;ANXA1;ANXA2;HDAC1;HGF;HMGB1;NR4A1;BIRC2;BIRC3;BIRC5;HSPD1;APOA2;IFNG;CCN1;FAS;FASLG;IL9;AQP1;ITGA2;ITGB1;USP17L2;KNG1;R…	4.26329	4.3505e-72
GOBP_REGULATION_OF_ANATOMICAL_STRUCTURE_MORPHOGENESIS	ADA;PDCD6;DNM1L;UST;PLXNC1;PAK4;CDX1;SEMA3C;CIB1;OLFM4;CXCL13;PDLIM5;CFL1;PHB2;CTHRC1;LRRK2;ADM;CLDN4;CLDN3;CRABP2;CRK;CSF1;CSF1R;CTNNB1;CX3CR1;CYP1B1;DCN;AGT;AGTR2;EDN1;EGF;MEGF8;EPHB2;ERBB2;ESR1;ETS1;F2;F3;FBLN1;FGA;FGF1;FGF2;FGFR2;DKK1;PLXND1;FLT1;NEDD4L;FN1;SIRT1;LPAR3;GATA2;GATA3;GATA6;GREM1;GDNF;GJA1;FOXP1;ANGPT2;GSK3B;ANXA1;HCK;HGF;HIF1A;HLA-G;FOXA2;HOXA11;IL1A;IL1B;FASLG;IL6;CXCL8;CXCR2;A…	4.34479	4.85668e-72
GOBP_RESPONSE_TO_ORGANIC_CYCLIC_COMPOUND	ADA;BCL2L11;ABCC9;CDK4;CDKN1B;PAK4;YAP1;FST;CARM1;CEBPA;TXNIP;CFTR;CHRM3;PHB2;UCN3;LRRK2;CCR5;CNR1;COL1A1;ADM;CLDN4;CREB1;PARP1;CSF1;CCN2;CTNNB1;GPBAR1;CYP1A1;CYP1B1;CYP19A1;ACE;DDX5;DNMT1;DNMT3A;DRD2;AGT;DUSP6;EDN1;EGFR;EGR1;AHR;AIF1;EPO;ESR1;ESR2;ESRRB;EZH2;FKBP4;FOXO3;PLCB1;SIRT1;FOS;GABPA;GATA6;GBA;MSTN;AMH;GH1;GHRHR;GJB2;FOXP1;GNRH1;ANGPT2;GPER1;GPX4;NR3C1;GSK3B;GSTM2;ANXA1;HDAC1;HDAC2;HOXA1…	4.46568	2.77044e-71
GOBP_POSITIVE_REGULATION_OF_CELL_POPULATION_PROLIFERATION	ADA;CDH3;PDCD6;CDK4;CDK6;CDKN1A;CDKN1B;LILRB2;YAP1;CARM1;CIB1;HPSE;FCRL3;CTHRC1;OSR2;ADM;CLDN7;MAPK14;CSF1;CSF1R;CSF2;CSF3;IL34;CCN2;CTNNB1;GPBAR1;CX3CR1;CD55;AKR1C2;DLX5;DNMT1;DPP4;DRD2;AGT;HBEGF;AGTR1;S1PR1;EDN1;EGF;EGFR;EGR1;AIF1;EPHB2;EPO;EPOR;ERBB2;AKT1;ESR1;EZH2;F2;F2R;F3;FCGR3A;FGF1;FGF2;FGF9;FGFR2;FOXM1;FLT1;FN1;SIRT1;FSHB;PTPN22;GATA2;GATA6;GREM1;GDNF;GHRH;GHRHR;GJA1;FOXP1;GLI1;GLI3;ANG;…	4.31714	4.42347e-71
GOBP_ANIMAL_ORGAN_MORPHOGENESIS	BCL2L11;TSHZ1;YAP1;CDX1;FST;SEMA3C;CFTR;PHB2;CTHRC1;OSR2;LRRK2;COL1A1;ADM;CPB2;MAPK14;CSF1;CSF1R;CCN2;CTNNB1;DCN;DLX3;DLX5;AGT;AGTR2;S1PR1;EDN1;EDNRA;MEGF8;EGFR;EMX2;EPHB2;EPHB4;ESR1;FANCD2;FBN1;FGF1;FGF2;FGF9;FGFR2;ZHX2;DKK1;FOXO3;PLXND1;HEY1;FJX1;MTOR;NR5A2;NECTIN3;GATA2;GATA3;GATA6;GBA;GREM1;GDNF;ANKRD1;INTU;PDCD4;GLI1;GLI3;NR3C1;SLC40A1;HDAC1;HDAC2;HGF;HIF1A;HOXA11;HOXA13;HOXB4;TNC;ID2;CCN1;R…	4.15227	8.26043e-71
GOBP_POSITIVE_REGULATION_OF_RNA_METABOLIC_PROCESS	SRA1;MIR543;MED16;TOB1;YAP1;CDX1;CARM1;CEBPA;CTCF;LILRB1;PPARGC1A;BRD8;CHUK;OSR2;COL1A1;CREB1;PARP1;MAPK14;CSF3;CTNNB1;DCN;DDX5;DLX3;DLX5;DRD2;AGT;AGTR2;S1PR1;EDN1;EGF;EGFR;EGR1;AHR;TET3;EPO;ERBB2;ERCC1;AKT1;ERCC6;ESR1;ESR2;ESRRB;ETS1;F2R;F2RL1;FGF1;FGF2;FGFR2;FOXM1;NCOA6;FOXO1;FOXO3;PLCB1;SIRT1;HEY1;FOS;NUP62;MTOR;FSHB;NR5A2;NR5A1;GABPA;GATA2;GATA3;GATA6;GREM1;MSTN;GDNF;FOXD3;ANKRD1;GLI1;GLI3;GP…	3.18458	2.10052e-70
GOBP_CELLULAR_RESPONSE_TO_LIPID	BCL2L11;KLRC4-KLRK1;CDK4;LILRB2;YAP1;CARM1;CXCL13;CFTR;LILRB1;PHB2;CCR5;COL1A1;CREB1;SIRPA;PARP1;MAPK14;CSF2;CSF3;GPBAR1;CX3CR1;CYP1B1;CD55;ACE;AKR1C1;AKR1C2;DDX5;EDN1;EGFR;AHR;EPHA3;EPHB2;AKT1;ESR1;ESR2;ESRRB;FGFR2;FKBP4;KLRK1;FOXO3;PLCB1;SIRT1;FOS;PTPN22;MSTN;GHRHR;GJB2;ANKRD1;FOXP1;IL37;PDCD4;GPER1;NR3C1;CD274;CXCL1;GSK3B;GSTP1;ANXA1;HCK;HDAC1;HDAC2;ACACA;HMGB1;IGF1R;TICAM2;IL1A;IL1B;IL6;CXCL8…	5.70318	5.63976e-70
GOBP_TUBE_MORPHOGENESIS	PDCD6;BCL2L11;PAK4;YAP1;CIB1;AGR2;CXCL13;HPSE;PHB2;CTHRC1;ADM;MAPK14;CSF1;CSF1R;CCN2;CTNNB1;ADRA2B;CX3CR1;CYP1B1;DCN;ACE;AGT;AGTR1;AGTR2;S1PR1;EDN1;EDNRA;EGF;MEGF8;EGFR;EMX2;EPHB2;EPHB4;ERBB2;AKT1;ESR1;ETS1;F3;FGF1;FGF2;FGF9;FGFR2;PLXND1;FLT1;FN1;SIRT1;HEY1;GATA2;GATA3;GATA6;GREM1;GDNF;FOXP1;GLI1;GLI3;ANG;CXCR3;ANGPT1;ANGPT2;NR3C1;ANXA1;ANXA2;HGF;HIF1A;HLA-G;NR4A1;HOXA11;HOXA13;HPGD;ID2;APOE;CCN1…	4.36525	1.14871e-69
GOBP_POSITIVE_REGULATION_OF_RESPONSE_TO_EXTERNAL_STIMULUS	KLRC4-KLRK1;DNM1L;RASGRP1;NOD1;CEBPA;CXCL13;CD226;LRRK2;CCR1;CCR7;CNR1;CPB2;CSF1;CSF1R;IL34;CX3CR1;ACE;AGT;AGTR1;S1PR1;EDN1;MEGF8;AIF1;ETS1;F2;F2RL1;F3;FGF2;KLRK1;FPR2;DAPK2;CADM1;NCR3;MSTN;PDCD4;HCK;HLA-G;HMGB1;IFNG;IGF1R;IL1B;IL2;IL4;IL6;CXCL8;CXCR2;IL12B;IL15;IL16;IL17A;IL18;IDO1;CXCL10;ITGA2;USP17L2;KDR;KIR2DL4;ARG1;LGALS1;LGALS9;LTA;LYN;SH2D1A;MIR126;MIR142;MIR21;MIR22;SMAD3;MBL2;MDK;MET;MIF…	6.82325	2.41889e-69
GOBP_ENZYME_LINKED_RECEPTOR_PROTEIN_SIGNALING_PATHWAY	CDH3;PDCD6;TOB1;CDK4;FST;AGR2;TXNIP;COL1A1;CRK;PARP1;MAPK14;CSF1;CSF1R;CCN2;CTNNB1;DCN;DDX5;DLX3;DLX5;DOK1;AGT;HBEGF;AGTR2;EGF;MEGF8;EGFR;EGR1;AHSG;EPHA3;EPHB2;EPHB4;ERBB2;AKT1;F3;FBN1;FGF1;FGF2;FGF9;FGFR2;DKK1;FOXO1;FLT1;PLCB1;SIRT1;FOS;NUP62;FSHB;GALNT3;GATA3;GATA6;GREM1;MSTN;AMH;GH1;AMHR2;GHRH;GHRHR;PDCD4;ANGPT1;ANGPT2;GPER1;GSK3B;HCK;HDAC1;HDAC2;HGF;HIF1A;HOXA13;HPGD;IGF1;IGF1R;IGFBP1;IGFBP3;…	4.17726	3.8005e-69
GOBP_NEGATIVE_REGULATION_OF_IMMUNE_SYSTEM_PROCESS	ADA;KLRC4-KLRK1;CDK6;LILRB2;ADAR;CEBPA;LILRB1;FCRL3;CNR1;CD200R1;CRK;PARP1;MAPK14;CTLA4;CTNNB1;CX3CR1;CYP19A1;CD55;DPP4;DRD2;DUSP1;AHR;ERBB2;AKT1;FBN1;KLRK1;PLCB1;ALOX15;PTPN22;GATA2;GREM1;TNFRSF21;GLI3;ANGPT1;GPER1;CD274;TBX21;ANXA1;HCK;HLA-B;HLA-DRB1;HLA-G;HMGB1;APOA2;IAPP;ID2;IHH;IL2;IL2RA;IL4;IL7R;IL10;IL12B;IDO1;INHA;INHBA;KIR2DL4;KLRC1;ARG1;LGALS3;LGALS9;LTF;LYN;SH2D1A;MIR181C;MIR21;MIR34A;…	6.93049	1.36162e-68
GOBP_POSITIVE_REGULATION_OF_LOCOMOTION	CDKN2B-AS1;PDCD6;DNM1L;SEMA3C;CIB1;CXCL13;CCR1;CCR7;COL1A1;CLDN4;CLDN3;CLDN7;CRK;MAPK14;CSF1;CSF1R;CSF2;IL34;CX3CR1;CYP1B1;AGT;HBEGF;S1PR1;EDN1;EGF;MEGF8;EGFR;AIF1;EPHB2;AKT1;ETS1;F2R;F2RL1;F3;FGF1;FGF2;FGF9;FLT1;FN1;SIRT1;CAPN7;FPR2;DAPK2;MTOR;FSHB;GATA2;GATA3;MSTN;FOXP1;ANGPT1;GPER1;CD274;ANXA1;HGF;HIF1A;HMGB1;ICAM1;IFNG;IGF1;IGF1R;CCN1;IL1A;IL1B;IL1R1;IL4;IL6;CXCL8;CXCR2;AQP1;IL16;CXCL10;INSR;…	5.61538	1.81611e-68
GOBP_REGULATION_OF_T_CELL_ACTIVATION	ADA;KLRC4-KLRK1;RASGRP1;LILRB2;LILRB1;CCR7;SIRPA;CSK;CTLA4;CTNNB1;CD55;DPP4;AIF1;EPO;ERBB2;AKT1;FANCD2;KLRK1;FOXO3;IL27;PTPN22;GATA3;TNFRSF21;GLI3;CD274;TBX21;ANXA1;HLA-DPB1;HLA-DQB1;HLA-DRB1;HLA-G;HMGB1;HSPD1;IFNG;IGF1;IHH;IL1A;IL1B;IL2;IL2RA;IL4;IL6;IL7;IL7R;IL10;IL12B;IL12RB1;IL15;IL18;IDO1;ARG1;LEP;LGALS1;LGALS3;LGALS9;LYN;MIR181C;MIR21;MDK;KITLG;MYB;FOXP3;IL23A;PIK3CA;B2M;PTEN;PTPRC;IL21;ACT…	7.95104	1.84939e-68
GOBP_GENERATION_OF_NEURONS	UST;PLXNC1;CDK6;PAK4;CARM1;SEMA3C;CIB1;PDLIM5;CFL1;CTHRC1;LRRK2;CNR1;ADM;CRABP2;CREB1;CRK;CRMP1;CSF1R;CTNNB1;ADRA2B;CX3CR1;ARX;DLX3;DLX5;DNMT3A;DPYSL2;DRD2;AGT;S1PR1;EDN1;EDNRA;MEGF8;EMX2;EPHA3;EPHB2;EPHB4;EPO;NR2F6;ERBB2;ERCC2;AKT1;ERCC6;EZH2;FGF2;FGFR2;FKBP4;ZHX2;KIFAP3;DKK1;FOXO3;PLXND1;ASTN2;NEDD4L;FN1;DICER1;HEY1;LPAR3;CHD5;GATA2;GATA3;GBA;GDNF;TNFRSF21;GLI3;GNRH1;MYLIP;GSK3B;HDAC1;HDAC2;HGF…	3.47973	2.22559e-68
GOBP_RESPONSE_TO_MOLECULE_OF_BACTERIAL_ORIGIN	KLRC4-KLRK1;CDK4;LILRB2;CXCL13;LILRB1;CCR5;CCR7;CNR1;ADM;SIRPA;MAPK14;CSF1;CSF2;CSF3;CX3CR1;CYP1A1;CD55;ACE;DIO2;EDN1;EPHB2;EPO;AKT1;F2R;FGFR2;KLRK1;FOS;PTPN22;GJB2;ANKRD1;FOXP1;IL37;PDCD4;CD274;CXCL1;GSTP1;HCK;HDAC2;HMGB1;NR4A1;HPGD;TICAM2;IL1A;IL1B;FASLG;IL6;CXCL8;IL10;IL12B;IL13;IL18;IDO1;CXCL10;ARG1;LGALS9;LOXL1;LTA;LTF;LYN;MIR142;MIR17;MIR20A;MIR21;MAOB;MIF;CXCL9;MPO;MRC1;MIR342;NFKB1;NFKBIA…	8.19678	4.61128e-68
GOBP_REGULATION_OF_IMMUNE_EFFECTOR_PROCESS	KLRC4-KLRK1;RASGRP1;NOD1;CD226;LILRB1;PHB2;FCRL3;CRK;CX3CR1;CD55;AHR;EPHB2;F2RL1;KLRK1;SIRT1;CADM1;IL27;NCR3;PTPN22;GATA2;GATA3;ANGPT1;TBX21;ANXA1;HK1;HLA-B;HLA-DRB1;HLA-G;HMGB1;HSPD1;APOA2;ICAM1;IFNG;IL1B;IL1R1;IL2;IL4;IL6;IL7R;IL10;IL12B;IL12RB1;IL13;IL17A;IL18;ITGAM;USP17L2;KIR2DL4;KLRC1;ARG1;LEP;LGALS3;LGALS9;LTA;LYN;SH2D1A;MIR21;MBL2;MIF;MLH1;MSH2;MYB;NOS2;FOXP3;IL23A;ENPP3;TREM2;AXL;B2M;PTP…	7.65035	2.1659e-66
GOBP_POSITIVE_REGULATION_OF_CELLULAR_COMPONENT_ORGANIZATION	BCL2L11;DNM1L;PLXNC1;CDKN1B;CXCL13;PPARGC1A;PRRT2;LRRK2;CCR7;CNR1;CPB2;CLDN3;CRABP2;DOCK11;MAPK14;CSF2;CSF3;CCN2;CTNNB1;DCN;DNMT1;DRD2;AGT;EDN1;EGF;MEGF8;EPHA3;EPHB2;EPO;ERCC1;ESR1;EZH2;F2RL1;FEN1;PLXND1;PLCB1;NEDD4L;FN1;LPAR3;NUP62;ALOX15;MTOR;LMOD1;POLDIP2;GATA2;GBA;GREM1;MSTN;GH1;ANGPT1;GPER1;GSK3B;ANXA1;ANXA2;HCK;HGF;HIF1A;HOXA13;IFNG;IGF1;APOE;IGF1R;IL1A;IL1B;IL1RAP;FASLG;IL4;IL6;IL17A;INSR;…	4.00573	2.61501e-66
GOBP_ADAPTIVE_IMMUNE_RESPONSE	ADA;KLRC4-KLRK1;LILRB2;CXCL13;CD226;LILRB1;CSK;CTLA4;CX3CR1;CD55;AHR;EPHB2;ERCC1;FCGR3A;FGA;KLRK1;SIRT1;CADM1;ALOX15;IL27;MTOR;GATA3;TNFRSF21;CD274;MSH6;TBX21;ANXA1;HLA-B;HLA-C;HLA-DPB1;HLA-DQB1;HLA-DRB1;HLA-G;HMGB1;HPRT1;HSPD1;ICAM1;CFI;IFNA1;IFNA13;IFNG;IL1B;IL1R1;IL2;IL4;IL6;IL7R;IL9;IL10;IL12B;IL12RB1;IL17A;IL18;KLRC1;ARG1;LTA;LYN;SH2D1A;MIR21;MBL2;MLH1;MSH2;NOTCH1;FOXP3;PDCD1;IL23A;PIK3CD;PI…	4.89821	3.64877e-66
GOBP_POSITIVE_REGULATION_OF_CELL_CELL_ADHESION	ADA;KLRC4-KLRK1;RASGRP1;LILRB2;CXCL13;LILRB1;CCR7;SIRPA;CSK;CD55;DPP4;AIF1;EPO;AKT1;ETS1;FGA;KLRK1;KIFAP3;FOXO3;PTPN22;GATA3;GLI3;CD274;ANXA1;HLA-DPB1;HLA-DQB1;HLA-DRB1;HLA-G;HMGB1;FOXA2;HSPD1;IFNG;IGF1;IHH;IL1A;IL1B;IL2;IL2RA;IL4;IL6;IL7;IL7R;IL10;IL12B;IL12RB1;IL15;IL18;JAK1;LEP;LGALS1;LGALS9;LYN;MIR21;MDK;KITLG;MYB;FOXP3;IL23A;PIK3CA;B2M;PTPRC;IL21;RELA;ACTB;BCL6;CCL2;CCL5;CCL19;CCL21;CX3CL1;S…	8.74514	7.09773e-66
GOBP_RESPONSE_TO_WOUNDING	CDH3;CDKN1A;MYL9;YAP1;HPSE;PHB2;CCR1;COL1A1;ADM;CPB2;CLDN4;CLDN3;CRK;MAPK14;CCN2;ADRA2B;CX3CR1;CYP1A1;DRD2;HBEGF;EDN1;EDNRA;AIF1;EPHB2;EPO;ERBB2;F2;F2R;F2RL1;F3;FBLN1;FGA;FGF1;FGF2;FGFR2;FN1;ALOX15;MTOR;GATA2;GLI1;GLI3;ANXA1;ANXA2;HIF1A;FOXA2;TNC;IGF1;APOE;IGF1R;CCN1;IL1A;IL6;AQP1;IL10;ILK;INHBA;ITGA2;ITGA5;ITGB1;ITGB3;JUN;KDR;KNG1;ARG1;RHOC;LOX;LYN;MIR17;MIR200B;MIR21;MIR34A;SMAD2;SMAD3;SMAD4;MD…	5.60899	1.5763e-65
GOBP_PROTEOLYSIS	PDCD6;BCL2L11;NOD1;CEBPA;MMP24;LRRK2;CPB2;CLDN4;CLDN3;CPM;PARP1;CCN2;CTNNB1;DAPK1;ACE;CFD;DPP4;DPP6;AGT;EGF;AHSG;ENO1;AKT1;F2;F2R;F3;FBLN1;FGA;NEDD4L;FN1;SIRT1;CAPN7;RNF19A;GBA;GLI3;GPER1;CCDC22;MYLIP;GSK3B;TBX21;ANXA2;HDAC1;HDAC2;HGF;HMGB1;NR4A1;HP;BIRC2;BIRC3;BIRC5;HSPD1;CFI;IFI27;IFNG;APOE;CCN1;IHH;FAS;IL1B;FASLG;IL9;AQP1;IL10;USP17L2;KNG1;LGALS9;LPA;LTF;LYN;MIRLET7B;MIR126;MIR17;MIR195;MIR205…	3.10398	1.99703e-65
GOBP_POSITIVE_REGULATION_OF_CELL_ACTIVATION	ADA;KLRC4-KLRK1;RASGRP1;CDKN1A;LILRB2;CEBPA;CD226;LILRB1;FCRL3;LRRK2;CCR7;SIRPA;CSK;CCN2;CD55;DPP4;AIF1;EPHB2;EPO;AKT1;F2RL1;FCGR3A;KLRK1;FOXO3;PTPN22;GATA2;GATA3;GLI3;CD274;TBX21;ANXA1;HLA-DPB1;HLA-DQB1;HLA-DRB1;HLA-G;HMGB1;HSPD1;IFNG;IGF1;IHH;IL1A;IL1B;IL2;IL2RA;IL4;IL6;IL7;IL7R;IL10;IL12B;IL12RB1;IL13;IL15;IL18;ITGAM;LEP;LGALS1;LGALS9;LYN;MIR142;MIR145;MIR21;MDK;KITLG;MIF;MLH1;MMP14;MSH2;MYB;F…	6.55733	3.14594e-65
GOBP_NEGATIVE_REGULATION_OF_CELL_DEATH	ADA;CDKN1B;PAK4;ADAR;YAP1;CIB1;AGR2;CFL1;LILRB1;PPARGC1A;PHB2;LRRK2;CCR7;CD200R1;CLDN7;CSF1;CSF1R;CSF2;CSF3;CCN2;CTH;CTNNB1;CX3CR1;DAPK1;DNMT1;DRD2;EDN1;EGFR;AIF1;ENO1;EPO;AKT1;ALB;F2R;FGA;FGF2;FGFR2;KIFAP3;DKK1;FOXO1;AKR1B1;PLXND1;SIRT1;NUP62;MTOR;GATA2;GATA3;GATA6;GBA;GREM1;GDNF;FOXP1;PDCD4;GLI3;ANGPT1;GPX4;GSK3B;GSTP1;SLC40A1;ANXA1;HCK;HDAC1;HDAC2;HGF;HIF1A;NR4A1;BIRC2;BIRC3;BIRC5;HSPD1;ICAM1;…	3.99689	8.3763e-65
GOBP_LEUKOCYTE_MEDIATED_IMMUNITY	KLRC4-KLRK1;RASGRP1;CD226;LILRB1;CRK;CX3CR1;CD55;ACE;AHR;ERCC1;F2;F2RL1;FCGR3A;KLRK1;CADM1;NCR3;GATA2;GATA3;MSH6;TBX21;HLA-B;HLA-DPB1;HLA-DQB1;HLA-DRB1;HLA-G;HMGB1;HPRT1;HSPD1;ICAM1;CFI;IL1B;IL1R1;IL2;IL4;IL6;IL7R;IL9;IL10;IL12B;IL12RB1;IL13;IL18;ITGAM;KIR2DL4;KIR3DL1;KLRC1;ARG1;LEP;LGALS9;LTA;LYN;SH2D1A;MBL2;MLH1;MSH2;NOS2;FOXP3;IL23A;PIK3CD;PIK3CG;TREM2;B2M;PTPRC;PVR;IL21;BCL6;STAT6;ADAM17;BTK;…	6.5404	9.63188e-65
GOBP_RESPONSE_TO_NITROGEN_COMPOUND	ADA;BCL2L11;ABCC9;CDK4;CDKN1B;NOD1;CARM1;CFTR;CHRM3;LRRK2;CCR7;CNR1;COL1A1;ADM;CREB1;CRHR1;CRHR2;CRK;PARP1;MAPK14;CSK;CCN2;CTNNB1;CYP1B1;CYP11A1;DNMT1;DNMT3A;AGRP;DRD2;AGT;AGTR1;AGTR2;EDN1;EDNRA;EGFR;EGR1;AHR;AHSG;AIF1;EPHB2;AKT1;EZH2;FBN1;FOXO1;FOXO3;PLCB1;SIRT1;FOS;FPR2;SH3BP4;MTOR;NR5A1;GABPA;PTPN22;GATA6;MSTN;GH1;GHRHR;GJA1;GJB2;GNRHR;GPER1;GSK3B;GSTM1;GSTM2;ANXA1;HDAC2;NR4A1;HPRT1;APEX1;BIRC…	3.7817	1.86353e-64
GOBP_CELLULAR_RESPONSE_TO_STRESS	MIR543;PDCD6;BCL2L11;RASGRP1;CDK6;CDKN1A;CDKN1B;CDKN2A;NOD1;NDRG1;YAP1;CEBPA;CIB1;AGR2;CFTR;PPARGC1A;BRD8;PHB2;UCN3;CHUK;LRRK2;CCR7;COMT;ADM;CRK;SIRPA;PARP1;MAPK14;CCN2;CTH;CTLA4;CTNNB1;CYP1B1;DAPK1;DDX5;DNMT3A;AGT;DUSP1;EDN1;EDNRA;EGFR;EGR1;AIF1;ENO1;EPO;ERCC1;ERCC2;AKT1;ERCC6;ALB;EZH2;F2RL1;FANCD2;FEN1;FGF1;FOXM1;NCOA6;FOXO1;FOXO3;AKR1B1;PLCB1;SIRT1;FOS;NUP62;ALOX15;MTOR;POLDIP2;PTPN22;GATA6;GB…	2.96242	1.90839e-64
GOBP_EMBRYO_DEVELOPMENT	ADA;PDCD6;BCL2L11;TSHZ1;YAP1;CDX1;CEBPA;SEMA3C;CFL1;CTHRC1;OSR2;COL1A1;ADM;CRABP2;CSF2;CTNNB1;ACE;DLX3;DLX5;DNMT1;DNMT3A;DUSP1;DUSP2;EDN1;EDNRA;MEGF8;EGFR;TET3;EPHB2;ERCC1;ERCC2;AKT1;ESRRB;FBN1;FGF2;FGF9;FGFR2;DKK1;FLT1;PLCB1;FN1;HEY1;NR5A2;GABPA;GATA2;GATA3;GATA6;GREM1;GDNF;GJA1;FOXD3;INTU;GLI1;GLI3;ANGPT1;DNMT3L;HDAC1;HDAC2;HIF1A;FOXA2;HOXA10;HOXA11;HOXA13;HOXB4;HSD17B2;ID2;IGF1;CCN1;RBPJ;IHH;I…	3.7618	1.94325e-63
GOBP_MONONUCLEAR_CELL_DIFFERENTIATION	ADA;RASGRP1;CDK6;LILRB2;CCR9;LILRB1;FCRL3;CCR7;DOCK11;CSF1;CSF1R;CSF2;IL34;CTLA4;CTNNB1;EGR1;ERBB2;EZH2;F2RL1;FANCD2;FOXO3;FOS;IL27;MTOR;PTPN22;GATA3;GBA;FOXP1;GLI3;TBX21;ANXA1;HLA-B;HLA-DRB1;HLA-G;HMGB1;ID2;IFNA1;IFNA13;IFNG;RBPJ;IHH;IL1A;IL1B;IL2;IL2RA;IL4;IL6;IL7;IL7R;IL9;IL10;IL11;IL12B;IL12RB1;IL15;IL18;INHA;INHBA;ITGB1;ITGB8;JUN;KLRC1;LEP;LEPR;LGALS1;LGALS3;LGALS9;LYN;MIR21;MDK;MMP14;MSH2;M…	6.25075	5.84704e-63
GOBP_IMMUNE_RESPONSE_REGULATING_SIGNALING_PATHWAY	ADA;KLRC4-KLRK1;LILRB2;NOD1;KHDRBS1;CD226;LILRB1;PHB2;FCRL3;CCR7;CD200R1;CSK;CTLA4;ESR1;F2RL1;FCGR3A;KLRK1;FPR1;FPR2;NCR3;PTPN22;GATA3;FOXP1;TNFRSF21;HCK;HLA-DPB1;HLA-DQB1;HLA-DRB1;HLA-G;HMGB1;BIRC2;BIRC3;HSPD1;TICAM2;USP17L2;KIR2DL1;KLRC1;LGALS3;LGALS9;LIMK1;LTF;LYN;SH2D1A;MIR17;MIR34A;MBL2;NFKBIA;NINJ1;PAK1;FOXP3;PIK3CA;PIK3CD;TREM2;PRKCB;MAPK1;MAPK8;MAP2K7;PSEN1;PTPRC;BAX;BCL2;RELA;WNK1;SRC;BR…	6.01837	7.23208e-63
GOBP_CELL_CHEMOTAXIS	KLRC4-KLRK1;DNM1L;CXCL13;CXCR6;CCR9;CCR1;CCR5;CCR7;CCR8;CRK;CSF1;CSF1R;IL34;CX3CR1;CYP19A1;DEFB4A;DPP4;HBEGF;DUSP1;AGTR1;S1PR1;EDN1;AIF1;F2RL1;FGF1;FGF2;KLRK1;FLT1;FPR2;DAPK2;GREM1;MSTN;CXCR3;CXCL1;ANXA1;HGF;HMGB1;NR4A1;IL1B;IL4;IL6;CXCL8;CXCR1;CXCR2;IL10;IL16;CXCL10;KDR;RHOG;LGALS3;LGALS9;LOX;LYN;MIR34A;MDK;MET;MIF;CXCL9;MMP2;NINJ1;NOTCH1;SERPINE1;PDGFRA;IL23A;PDGFRB;PF4;PF4V1;PGF;PIK3CD;PIK3CG;…	8.44349	8.88591e-63
GOBP_POSITIVE_REGULATION_OF_PHOSPHORUS_METABOLIC_PROCESS	RASGRP1;CDKN1A;CDKN1B;LILRB2;CIB1;MTCO2P12;PPARGC1A;AKAP13;PHB2;FCRL3;CKS1B;LRRK2;CCR7;CLDN3;CSF1;CSF1R;CSF2;CSF3;CSK;IL34;ADRA1A;CCN2;ADRA2B;CX3CR1;ACE;DRD2;AGT;HBEGF;AGTR2;EDN1;EGF;EGFR;EGR1;AIF1;ENO1;EPHA3;EPHB2;EPHB4;EPO;ERBB2;AKT1;ERCC6;EZH2;F2;FGF1;FGF2;FGF9;FGFR2;DKK1;FLT1;SIRT1;FPR2;MTOR;GBA;GREM1;MSTN;GH1;ANG;ANGPT1;GPER1;HDAC2;HGF;HIF1A;HLA-DRB1;BIRC5;IFNA1;IFNA13;IFNG;IGF1;IGF1R;CCN1;F…	4.17172	1.11152e-62
GOBP_POSITIVE_REGULATION_OF_CELL_DIFFERENTIATION	ADA;RASGRP1;PLXNC1;LILRB2;YAP1;CARM1;CEBPA;CIB1;OLFM4;CTHRC1;CCR1;COL1A1;ADM;CRABP2;CREB1;CRK;PARP1;MAPK14;CSF1;CSF2;CSF3;IL34;CCN2;CTH;CTNNB1;ADRA2B;CX3CR1;ACE;DRD2;AGT;AGTR1;EDN1;MEGF8;EPHB2;EPO;AKT1;ETS1;EZH2;FGA;FGF2;DKK1;FOXO3;PLXND1;PLCB1;FN1;DICER1;SIRT1;FOS;LPAR3;MTOR;GATA2;GATA3;GATA6;GDNF;GJA1;GLI3;GPER1;GSK3B;ANXA1;HDAC1;HDAC2;HGF;HIF1A;HLA-DRB1;HLA-G;HMGB1;HOXA11;HOXB4;ID2;IFNG;IGF1;I…	4.13488	7.36719e-62
GOBP_CYTOSKELETON_ORGANIZATION	KIF20A;CDKN1B;PAK4;MYL9;CIB1;PDLIM5;DCTN6;CFL1;AKAP13;CCR7;CLDN3;CRK;CRMP1;CSF1R;CSF3;CCN2;CTNNB1;DPYSL2;S1PR1;EDN1;AIF1;EPHA3;F2RL1;FKBP4;SIRT1;NUP62;ALOX15;MTOR;LMOD1;RNF19A;POLDIP2;GJA1;ANKRD1;ANG;ANK1;CXCL1;GSK3B;TMOD3;ANXA1;HCK;HLA-DRB1;BIRC5;APOE;IL1A;AQP1;ITGB1;ITGB3;KISS1;KRAS;RHOC;RHOG;STMN1;LIMK1;LMNB1;MIR143;MIR145;MIR20A;MIR21;MIR214;TACSTD2;SMAD3;SMAD4;MAP2;MDK;MECP2;MET;MLH1;NEFM;NT…	3.23577	1.14318e-61
GOBP_POSITIVE_REGULATION_OF_LEUKOCYTE_CELL_CELL_ADHESION	ADA;KLRC4-KLRK1;RASGRP1;LILRB2;LILRB1;CCR7;SIRPA;CSK;CD55;DPP4;AIF1;EPO;AKT1;ETS1;KLRK1;FOXO3;PTPN22;GATA3;GLI3;CD274;ANXA1;HLA-DPB1;HLA-DQB1;HLA-DRB1;HLA-G;HMGB1;HSPD1;IFNG;IGF1;IHH;IL1A;IL1B;IL2;IL2RA;IL4;IL6;IL7;IL7R;IL12B;IL12RB1;IL15;IL18;LEP;LGALS1;LGALS9;LYN;MIR21;MDK;KITLG;MYB;FOXP3;IL23A;PIK3CA;B2M;PTPRC;IL21;RELA;ACTB;BCL6;CCL2;CCL5;CCL19;CCL21;SELE;SMARCC1;SRC;THY1;TNF;CCR2;TYK2;VAV1;V…	9.37048	4.15529e-61
GOBP_ADAPTIVE_IMMUNE_RESPONSE_BASED_ON_SOMATIC_RECOMBINATION_OF_IMMUNE_RECEPTORS_BUILT_FROM_IMMUNOGLOBULIN_SUPERFAMILY_DOMAINS	ADA;CXCL13;CD226;LILRB1;CD55;AHR;EPHB2;ERCC1;FCGR3A;CADM1;IL27;MTOR;GATA3;CD274;MSH6;TBX21;ANXA1;HLA-B;HLA-DPB1;HLA-DQB1;HLA-DRB1;HLA-G;HMGB1;HPRT1;HSPD1;ICAM1;CFI;IL1B;IL1R1;IL2;IL4;IL6;IL7R;IL9;IL10;IL12B;IL12RB1;IL18;KLRC1;ARG1;LTA;MIR21;MBL2;MLH1;MSH2;NOTCH1;FOXP3;IL23A;TREM2;B2M;PTPRC;PVR;BCL6;CCL19;STAT3;STAT6;ADAM17;BTK;TGFB1;TLR4;SERPING1;TNF;TNFRSF1B;C1R;C3;C5;CCR2;TYK2;C9;ZP3;IL18R1;BCL…	7.3254	5.75731e-61
GOBP_LIPID_METABOLIC_PROCESS	CDK4;CEBPA;CETP;CFTR;PPARGC1A;SMPDL3A;PHB2;CYP2R1;CCR7;CNR1;SGPP2;COMT;ADM;CRABP2;CREB1;CRH;CRK;MAPK14;CSF1R;CTH;CYP1A1;CYP1A2;CYP1B1;CYP2B6;CYP2C19;CYP3A4;TTC39B;CYP11A1;CYP17A1;CYP19A1;CYP26A1;AKR1C1;AKR1C2;DECR1;DIO2;EDN1;EGR1;AKT1;ESR1;F2;FGF1;FGF2;AKR1B1;FLT1;PLCB1;FMO2;SIRT1;ALOX15;MTOR;FSHB;NR5A2;NR5A1;PTPN22;GATA6;GBA;GC;HPGDS;ANG;GPER1;GPX4;NR3C1;GSTM1;GSTM2;GSTP1;ANXA1;ACACA;HPGD;HSD3B1…	3.27636	2.7429e-59
GOBP_POSITIVE_REGULATION_OF_CELL_DEATH	BCL2L11;DNM1L;CDKN1A;CDKN1B;CDKN2A;NOD1;TXNIP;MTCO2P12;LILRB1;LRRK2;CNR1;ADM;PARP1;CCN2;CTLA4;CTNNB1;CYP1B1;DAPK1;ACE;DNMT3A;AGT;DUSP6;AGTR2;EGR1;DKK1;FOXO1;FOXO3;SIRT1;FOS;DAPK2;GATA6;ANKRD1;FOXP1;PDCD4;GPER1;NR3C1;CD274;PDIA3;GSK3B;ANXA1;HLA-G;HMGB1;NR4A1;HOXA13;HP;HPGD;HSPD1;IAPP;IFNG;IGFBP3;CCN1;FAS;FASLG;IL6;CXCR2;IL10;IL12B;IDO1;INHBA;ITGAM;ITGB1;JUN;KNG1;LEP;LGALS1;LGALS9;LTA;LYN;MIR132;MI…	5.02919	8.24694e-59
GOBP_LEUKOCYTE_PROLIFERATION	ADA;RASGRP1;CDKN1A;LILRB2;LILRB1;FCRL3;CRP;CSF1;CSF1R;CSF2;IL34;CTLA4;CTNNB1;CD55;ACE;AHR;AIF1;EPHB2;EPO;ERBB2;F2RL1;FCGR3A;CADM1;IL27;PTPN22;GBA;GREM1;TNFRSF21;CD274;GSTP1;ANXA1;HLA-DPB1;HLA-DRB1;HLA-G;HMGB1;HPRT1;HSPD1;IFNA1;IFNA13;IGF1;IHH;IL1A;IL1B;IL2;IL2RA;IL4;IL6;IL7;IL7R;IL9;IL10;IL12B;IL12RB1;IL13;IL15;IL18;IDO1;ARG1;LEP;LGALS3;LGALS9;LYN;MIR181C;MIR21;KITLG;MIF;ATM;FOXP3;IL23A;ENPP3;PIK…	7.44145	8.45151e-59
GOBP_SECRETION	ADA;DNM1L;RASGRP1;ABCC4;AGR2;MTCO2P12;CFTR;LILRB1;PRRT2;CHRM3;UCN3;LRRK2;CCR1;CNR1;ADM;CPB2;CREB1;CRH;CRHR1;CSF2;ADRA1A;CCN2;ADRA2B;CYP19A1;ACE;DRD2;AGT;AGTR1;EDN1;EGF;F2R;F2RL1;FCGR3A;FGA;FOXO1;GATA2;GATA3;GDNF;GHRH;GHRHR;GJA1;ANKRD1;GNRHR;ANG;GPER1;ANK1;GSK3B;ANXA1;ANXA2;HCK;HIF1A;HLA-DRB1;NR4A1;FOXA2;IFNG;IGF1;APOE;IL1A;IL1B;IL1RN;IL4;IL6;AQP1;IL11;IL12B;IL13;AQP5;INHA;INHBA;AQP9;ITGAM;KCNQ1;K…	3.93086	9.15994e-59
GOBP_BLOOD_VESSEL_MORPHOGENESIS	PDCD6;PAK4;YAP1;CIB1;CXCL13;HPSE;ADM;MAPK14;CCN2;CTNNB1;ADRA2B;CX3CR1;CYP1B1;DCN;ACE;AGT;AGTR1;S1PR1;EDN1;EDNRA;EGF;EPHB2;EPHB4;ERBB2;AKT1;ETS1;F3;FGF1;FGF2;FGF9;FGFR2;PLXND1;FLT1;FN1;SIRT1;HEY1;GATA2;GATA6;GREM1;ANG;CXCR3;ANGPT1;ANGPT2;ANXA1;ANXA2;HGF;HIF1A;HLA-G;NR4A1;HOXA13;HPGD;APOE;CCN1;RBPJ;IHH;IL1A;IL1B;FASLG;IL6;CXCL8;CXCR2;AQP1;IL10;IL12B;IL18;CXCL10;ITGA5;ITGAV;ITGB1;ITGB3;ITGB8;JAK1;JU…	4.63004	1.71204e-58
GOBP_SMALL_MOLECULE_METABOLIC_PROCESS	ADA;DNM1L;CEBPA;MTCO2P12;CETP;CFTR;PPARGC1A;SMPDL3A;CYP2R1;LRRK2;CNR1;SGPP2;ADM;CRABP2;CRMP1;PARP1;MAPK14;CTH;CYP1A1;CYP1A2;CYP1B1;CYP2B6;CYP2C19;CYP3A4;TTC39B;CYP11A1;CYP17A1;CYP19A1;CYP26A1;AKR1C1;AKR1C2;DECR1;SARDH;DPYSL2;EDN1;EGR1;ENO1;AKT1;FGF1;FGF2;FOXO1;AKR1B1;PLCB1;FMO2;SIRT1;ALOX15;MTOR;FSHB;NR5A2;GALT;GATM;GBA;GC;HPGDS;GPER1;GPX4;NR3C1;GSTM1;GSTM2;GSTP1;ANXA1;HIF1A;HK1;ACACA;FOXA2;HPGD;…	2.90981	2.27363e-58
GOBP_REGULATION_OF_TRANSFERASE_ACTIVITY	DNM1L;RASGRP1;CDKN1A;CDKN1B;CDKN2A;ADAR;CDKN3;CEBPA;CIB1;AKAP13;PHB2;CKS1B;LRRK2;CCR7;CSF1;CSF1R;CSK;IL34;ADRA1A;CTNNB1;ADRA2B;ACE;DRD2;AGT;HBEGF;DUSP1;AGTR1;EDN1;EGF;EGFR;EGR1;EPHA3;EPHB2;EPHB4;EPO;ERBB2;AKT1;ERCC6;EZH2;F2;FGF1;FGF2;FGFR2;DKK1;FLT1;SIRT1;NUP62;MTOR;PTPN22;GBA;GREM1;MSTN;GH1;PDCD4;ANG;ANGPT1;GSK3B;GSTP1;GTF2H1;HGF;HLA-DRB1;FOXA2;APOA2;IFNG;IGF1;APOE;IGF1R;CCN1;IL1B;IL2;IL4;IL12B;…	3.99196	3.37459e-58
GOBP_CIRCULATORY_SYSTEM_PROCESS	ADA;DNM1L;ABCC9;ABCC4;YAP1;UTS2;AKAP13;CHRM3;CNR1;ADM;CRP;ADRA1A;CCN2;ADRA2B;ACE;DRD2;AGT;HBEGF;AGTR1;AGTR2;EDN1;EDNRA;EPO;F2R;F2RL1;FGA;NEDD4L;SLC7A8;MTOR;GATA6;GJA1;ANGPT1;GPER1;GSTM2;HSD11B2;ID2;APOE;IL2;CXCR2;CXCL10;INSR;AR;KCNQ1;KNG1;LEP;LEPR;LPA;MIR17;MIR200C;MIR21;MIR27B;SMAD3;MDM2;MECP2;MMP2;NOS1;NOS2;NOS3;OXTR;PIK3CA;PIK3CG;DLL4;PPARA;PPARG;PTGS2;ACTA2;REN;RGS4;ROCK1;S100A1;CXCL12;SLC1A1…	5.02251	3.67605e-58
GOBP_RESPONSE_TO_ABIOTIC_STIMULUS	ADA;PDCD6;CDKN1A;CDKN1B;NDRG1;YAP1;TXNIP;MTCO2P12;MMP24;PHB2;UCN3;COL1A1;ADM;CPB2;CLDN3;PARP1;MAPK14;CSF1;CCN2;CTNNB1;CYP1A1;ACE;DIO2;DNMT3A;DPP4;AGRP;DRD2;AGT;EDN1;EDNRA;EGFR;EGR1;AIF1;ENO1;EPO;NR2F6;ERCC1;ERCC2;AKT1;ERCC6;FANCD2;FEN1;FGF1;FGF2;FOXO1;FOXO3;AKR1B1;SIRT1;FOS;MTOR;GATA3;GATA6;GBA;MSTN;ANKRD1;ANG;ANGPT2;GSK3B;MSH6;ANXA1;H2AX;HDAC2;HIF1A;NR4A1;BIRC2;HSD11B2;HSPD1;ID2;IGF1;IGF1R;IGFBP…	3.56245	6.97114e-58
GOBP_POSITIVE_REGULATION_OF_MAPK_CASCADE	RASGRP1;NOD1;CIB1;AKAP13;PHB2;FCRL3;LRRK2;CCR1;CCR7;CRK;CSF1R;CSK;IL34;ADRA1A;CCN2;CTNNB1;ADRA2B;GPBAR1;DRD2;EDN1;EGF;EGFR;EPO;ERBB2;EZH2;F2R;F2RL1;FGA;FGF1;FGF2;FGFR2;DKK1;FLT1;PLCB1;LPAR3;FPR2;ALOX15;FSHR;PTPN22;GH1;ANGPT1;GPER1;HGF;HLA-DRB1;HMGB1;IAPP;ICAM1;IGF1;APOE;IGF1R;IGFBP3;IGFBP6;IL1A;IL1B;IL6;IL11;INHBA;INSR;AR;ITGB3;JUN;KDR;KISS1;LEP;LGALS9;LIF;MIRLET7B;MIR126;MIR21;MIR27B;KITLG;MIF;M…	5.66211	1.21665e-57
GOBP_LEUKOCYTE_CHEMOTAXIS	KLRC4-KLRK1;DNM1L;CXCL13;CCR1;CCR5;CCR7;CSF1;CSF1R;IL34;CX3CR1;CYP19A1;DPP4;DUSP1;S1PR1;EDN1;AIF1;F2RL1;KLRK1;FLT1;FPR2;DAPK2;GREM1;MSTN;CXCL1;ANXA1;HMGB1;IL1B;IL4;IL6;CXCL8;CXCR1;CXCR2;IL10;IL16;CXCL10;LGALS3;LGALS9;LYN;MDK;MIF;CXCL9;MMP2;NINJ1;SERPINE1;IL23A;PF4;PF4V1;PGF;PIK3CD;PIK3CG;MAPK1;MAPK3;PTN;CXCL16;RARRES2;CCL1;CCL2;CCL5;CCL11;CCL14;CCL16;CCL17;CCL19;CCL21;CCL22;CCL25;CXCL5;CX3CL1;CXC…	10.0317	1.28782e-57
GOBP_NEGATIVE_REGULATION_OF_DEVELOPMENTAL_PROCESS	CDH3;SRA1;TOB1;CDK6;CDKN1A;CDKN1B;YAP1;FST;CARM1;CEBPA;SEMA3C;CIB1;CETP;LILRB1;H4-16;CCR1;CRP;CTLA4;CTNNB1;DCN;DNMT1;AGT;EGFR;AHSG;EPHB2;ERBB2;ESRRB;EZH2;F2;FBLN1;FBN1;FGF9;ZHX2;KIFAP3;DKK1;FOXO1;FOXO3;DICER1;SIRT1;HEY1;NR5A1;GABPA;GATA2;GATA3;GREM1;MSTN;AMH;FOXP1;PDCD4;GLI3;ANGPT2;GPER1;GSK3B;TBX21;ANXA1;HDAC1;HDAC2;HIF1A;HLA-G;HMGB1;FOXA2;IAPP;ID2;IFNG;IGF1;RBPJ;IHH;IL1A;IL1B;IL2;FASLG;IL4;IL6;…	3.79467	1.5316e-57
GOBP_ION_TRANSPORT	ABCB6;DNM1L;ABCC9;ABCC4;CDKN1B;LILRB2;MTCO2P12;CFTR;LILRB1;SCN11A;CHRM3;PHB2;FCRL3;CLCN3;ANO4;CCR1;CCR5;CCR7;CNR1;SLCO6A1;CLDN4;CRH;CRHR1;CSF2;ADRA1A;CCN2;CNIH3;CTNNB1;ADRA2B;CYB5A;DAPK1;ACE;AKR1C1;DPP6;DRD2;AGT;EDN1;EDNRA;EGF;EPHB2;EPO;AKT1;F2;F2R;FGF2;FKBP4;NEDD4L;SLC7A8;GDNF;GJA1;GPER1;REM1;GSTM2;SLC40A1;ANXA1;ANXA2;IFNG;IL1A;IL1B;FASLG;AQP1;IL13;IL16;CXCL10;AQP9;ITGAV;ITGB1;ITGB3;KCNQ1;KCNQ2;…	3.07142	1.65645e-57
GOBP_POSITIVE_REGULATION_OF_TRANSCRIPTION_BY_RNA_POLYMERASE_II	MED16;YAP1;CDX1;CEBPA;LILRB1;PPARGC1A;BRD8;CHUK;OSR2;CREB1;PARP1;MAPK14;CSF3;CTNNB1;DCN;DLX3;DLX5;DRD2;S1PR1;EDN1;EGFR;EGR1;AHR;TET3;ERCC1;AKT1;ERCC6;ESR1;ESRRB;ETS1;F2RL1;FGF1;FGF2;FGFR2;FOXM1;NCOA6;FOXO1;FOXO3;SIRT1;HEY1;FOS;FSHB;NR5A2;NR5A1;GABPA;GATA2;GATA3;GATA6;GREM1;GDNF;FOXD3;GLI1;GLI3;GPER1;MED4;NR3C1;TBX21;SLC40A1;ANXA2;HDAC1;HDAC2;HGF;HIF1A;HMGB1;HMGA1;NR4A1;FOXA2;HOXA10;HOXA13;HOXB4;A…	3.39797	1.44433e-56
GOBP_MYELOID_LEUKOCYTE_MIGRATION	DNM1L;OLFM4;CXCL13;CCR1;CCR7;CD200R1;SIRPA;CSF1;CSF1R;IL34;CX3CR1;CYP19A1;DPP4;DUSP1;EDN1;AIF1;FLT1;PLCB1;FPR2;DAPK2;GREM1;MSTN;CXCL1;ANXA1;HMGB1;IL1A;IL1B;IL1R1;IL4;IL6;CXCL8;CXCR1;CXCR2;IL17A;CXCL10;RHOG;LGALS3;LYN;MDK;KITLG;MIF;CXCL9;MMP2;MMP14;CD200;SERPINE1;IL23A;PF4;PF4V1;PGF;PIK3CD;PIK3CG;TREM2;MAPK1;MAPK3;PTGER4;RARRES2;CCL1;CCL2;CCL5;CCL11;CCL14;CCL16;CCL17;CCL19;CCL21;CCL22;CCL25;CXCL5;…	9.55516	1.16432e-55
GOBP_POSITIVE_REGULATION_OF_HYDROLASE_ACTIVITY	PDCD6;BCL2L11;RASGRP1;NOD1;CXCL13;PHB2;FCRL3;LRRK2;CCR7;CLDN4;CLDN3;CRK;DOCK11;ADRA1A;CCN2;DAPK1;AGT;AGTR1;AGTR2;S1PR1;EDNRA;EGFR;ERBB2;AKT1;ESR1;EZH2;F2R;F2RL1;F3;FBLN1;FGF2;FGFR2;FLT1;FN1;SIRT1;MTOR;ANG;GPER1;GSK3B;HMGB1;HSPD1;IFNG;CCN1;FAS;FASLG;ITGA2;ITGB1;USP17L2;RHOC;RHOG;LGALS9;LYN;MIR17;MIR195;MIR205;MIR21;MIR27B;SMAD3;CD200;MYC;NGFR;NTF3;NTRK3;P2RY6;PCNA;PDGFRA;PDGFRB;WNT4;PPARG;MAPK8;PT…	4.94889	2.15725e-55
GOBP_NEGATIVE_REGULATION_OF_CELL_POPULATION_PROLIFERATION	TOB1;CDK6;CDKN1A;CDKN1B;LILRB2;CDKN2A;CDKN3;NDRG1;CEBPA;CIB1;CTCF;LILRB1;PPARGC1A;NUDT6;PHB2;ADM;CPB2;CLDN3;CRP;CSF1R;CSK;ADRA1A;CTLA4;CTNNB1;CYP1B1;DRD2;DUSP1;AIF1;ERBB2;ETS1;F2R;FBLN1;FGF2;FGFR2;KIFAP3;FLT1;DICER1;NUP62;SH3BP4;CHD5;GATA2;GATA3;GATA6;GREM1;MSTN;INTU;TNFRSF21;PDCD4;HPGDS;GLI3;ANG;GPER1;CD274;CXCL1;GSTP1;HLA-DRB1;HLA-G;HMGA1;IFNG;APOE;IGFBP3;IGFBP6;IGFBP7;RBPJ;IHH;IL1A;IL1B;IL2;IL…	4.18716	2.7181e-55
GOBP_CELL_PROJECTION_ORGANIZATION	UST;PLXNC1;ABCC4;PAK4;YAP1;CARM1;SEMA3C;CIB1;PDLIM5;CFL1;CTHRC1;LRRK2;CCR7;CNR1;ADM;CRABP2;CREB1;CRK;DOCK11;CRMP1;CSF1R;CTNNB1;ARX;DLX5;DPYSL2;DRD2;AGT;S1PR1;EDN1;EDNRA;MEGF8;AIF1;EPHA3;EPHB2;EPHB4;EPO;ERBB2;AKT1;ERCC6;EZH2;F2RL1;FGFR2;FKBP4;KIFAP3;DKK1;PLXND1;NEDD4L;FN1;DICER1;LPAR3;MTOR;GATA3;GBA;MSTN;GDNF;INTU;TNFRSF21;GLI3;MYLIP;GSK3B;HDAC2;HGF;HMGB1;HPRT1;TNC;ICAM1;APOE;IGF1R;IL2;IL6;ILK;INS…	3.02228	2.84907e-55
GOBP_CELL_MORPHOGENESIS	UST;PLXNC1;YAP1;SEMA3C;CIB1;OLFM4;PDLIM5;CFL1;LRRK2;CLDN4;CLDN3;CRABP2;CREB1;CRK;CRMP1;MAPK14;CSF1R;CTNNB1;ARX;DLX5;DPYSL2;DRD2;EDN1;EDNRA;MEGF8;EGFR;EPHA3;EPHB2;EPHB4;ERBB2;F2;FBLN1;FGA;FGFR2;DKK1;PLXND1;NEDD4L;FN1;DICER1;LPAR3;GATA3;GREM1;GDNF;GLI3;GSK3B;ANXA1;HCK;HGF;HOXA13;HPRT1;APOE;IGF1R;IHH;IL7R;ILK;AR;ITGAV;ITGB1;ITGB3;KDR;RHOC;L1CAM;RHOG;LAMB1;LAMC2;STMN1;LIMK1;MIR21;TACSTD2;SMAD4;MAP2;M…	3.67316	3.42724e-55
GOBP_POSITIVE_REGULATION_OF_PHOSPHORYLATION	RASGRP1;CDKN1A;CDKN1B;CIB1;AKAP13;PHB2;CKS1B;LRRK2;CCR7;CLDN3;CSF1;CSF1R;CSF2;CSF3;CSK;IL34;ADRA1A;CCN2;ADRA2B;CX3CR1;ACE;DRD2;AGT;HBEGF;EDN1;EGF;EGFR;EGR1;AIF1;EPHA3;EPHB2;EPHB4;EPO;ERBB2;AKT1;ERCC6;EZH2;F2;FGF1;FGF2;FGF9;FGFR2;DKK1;FLT1;SIRT1;FPR2;MTOR;GREM1;MSTN;GH1;ANG;ANGPT1;GPER1;HDAC2;HGF;HIF1A;HLA-DRB1;BIRC5;IFNA1;IFNA13;IFNG;IGF1;IGF1R;CCN1;FAS;IL1B;IL2;IL4;IL6;IL11;IL12B;IL13;IL15;IL18;…	4.07166	4.53967e-55
GOBP_NEGATIVE_REGULATION_OF_MOLECULAR_FUNCTION	KLRC4-KLRK1;CDKN1A;CDKN1B;CDKN2A;ADAR;CEBPA;CIB1;TXNIP;PHB2;CHUK;LRRK2;CNR1;CRHR1;CRMP1;CSK;CYP1B1;ACE;DRD2;AGT;DUSP1;AGTR2;AHSG;EPHB2;EPO;AKT1;ESR1;ESR2;EZH2;KLRK1;DKK1;NEDD4L;SIRT1;HEY1;NUP62;SH3BP4;PTPN22;GBA;MSTN;PDCD4;CCDC22;REM1;GSK3B;GSTM2;GSTP1;ANXA1;ANXA2;HDAC2;HGF;NR4A1;FOXA2;HP;BIRC2;BIRC3;BIRC5;APOA2;ID2;IFIT1;IFNG;APOE;IL1B;IL7;IL9;AQP1;IL10;IL13;ITGAV;ITGB3;JUN;USP17L2;KNG1;STMN1;LE…	3.42175	1.12003e-54
GOBP_NEGATIVE_REGULATION_OF_NUCLEOBASE_CONTAINING_COMPOUND_METABOLIC_PROCESS	TOB1;CDK6;CDKN1A;CDKN1B;CDKN2A;YAP1;FST;CEBPA;TXNIP;KHDRBS1;CTCF;PHB2;OSR2;CREB1;PARP1;MAPK14;CSF2;CTNNB1;DDX5;ARX;DNMT1;DNMT3A;DNMT3B;EDN1;EGR1;AHR;ELAVL1;ENO1;EPO;NR2F6;ERCC1;ERCC6;ESR1;ESR2;EZH2;FGF9;FGFR2;ZHX2;DKK1;FOXM1;FOXO1;FOXO3;PLCB1;DICER1;SIRT1;HEY1;GABPA;CHD5;GATA2;GATA3;GATA6;GREM1;GDNF;FOXD3;ANKRD1;FOXP1;PDCD4;GLI3;NR3C1;MSH6;DNMT3L;TBX21;HDAC1;HDAC2;HMGB1;HMGA1;HOXB4;APEX1;BIRC5;ID…	3.01059	4.70533e-54
GOBP_CENTRAL_NERVOUS_SYSTEM_DEVELOPMENT	BCL2L11;ABCB6;CDK6;LRRK2;CLDN3;CREB1;CRK;CSF1R;CSK;VCAN;IL34;CTNNB1;CX3CR1;ACE;ARX;DLX5;DPYSL2;DRD2;AGTR2;S1PR1;EGF;EGFR;AIF1;EMX2;EPHB2;EPOR;ERBB2;ERCC2;EZH2;F2;FANCD2;FGF2;FGF9;FGFR2;DKK1;NCOA6;FOXO3;PLCB1;CADM1;MTOR;CADM2;CHD5;GATA2;GBA;GDNF;GHRH;GHRHR;FOXP1;INTU;TNFRSF21;GLI1;GLI3;GSK3B;GSTP1;H2AX;HDAC1;HDAC2;HIF1A;HPRT1;HSD3B1;HSD3B2;ID2;IFNG;IFNGR1;IGF1R;RBPJ;IL1B;IL6;CXCR2;AQP1;INHBA;ITGAM…	3.56422	5.16242e-54
GOBP_EXPORT_FROM_CELL	DNM1L;RASGRP1;ABCC4;CFTR;LILRB1;PRRT2;UCN3;LRRK2;CCR1;CNR1;ADM;CPB2;CREB1;CRH;CRHR1;ADRA1A;CCN2;ADRA2B;CYP19A1;DRD2;AGT;AGTR1;EDN1;F2R;F2RL1;FCGR3A;FGA;FOXO1;GATA2;GATA3;GDNF;GHRH;GHRHR;GJA1;ANKRD1;GNRHR;ANG;GPER1;ANK1;GSK3B;SLC40A1;ANXA1;ANXA2;HCK;HIF1A;HLA-DRB1;NR4A1;FOXA2;IFNG;IGF1;APOE;IL1A;IL1B;IL1RN;IL4;IL6;AQP1;IL11;IL12B;IL13;INHA;INHBA;ITGAM;KCNQ1;KISS1;LEP;LGALS9;LIF;LYN;MIR17;MIR21;MIR…	3.87471	6.46111e-54
GOBP_RESPONSE_TO_GROWTH_FACTOR	PDCD6;TOB1;FST;CIB1;CXCL13;COL1A1;CREB1;CRK;PARP1;MAPK14;CCN2;CTNNB1;CX3CR1;DCN;DDX5;DLX3;DLX5;AGT;DUSP6;AGTR2;EDN1;MEGF8;EGFR;EGR1;ERBB2;AKT1;FBN1;FGF1;FGF2;FGF9;FGFR2;DKK1;FOXO3;FLT1;SIRT1;FOS;FSHB;GALNT3;GATA3;GATA6;GREM1;MSTN;AMHR2;ANKRD1;PDCD4;ANGPT2;NR3C1;ANXA1;HAS1;HDAC1;HDAC2;HGF;HIF1A;NR4A1;HOXA13;HPGD;IGF1R;CCN1;RBPJ;IL1B;FASLG;IL4;CXCL8;IL10;IL12B;ILK;INSR;ITGA5;ITGB1;ITGB3;ITGB8;JUN;K…	4.25479	8.81827e-54
GOBP_POSITIVE_REGULATION_OF_PROTEIN_MODIFICATION_PROCESS	PDCD6;RASGRP1;CDKN1A;CDKN1B;LILRB2;CIB1;PPARGC1A;AKAP13;PHB2;FCRL3;CKS1B;LRRK2;CCR7;CLDN3;CSF1;CSF1R;CSF2;CSF3;CSK;IL34;ADRA1A;CCN2;CTNNB1;ADRA2B;CX3CR1;ACE;DNMT1;DNMT3B;DRD2;AGT;HBEGF;AGTR2;EDN1;EGF;EGFR;EGR1;AIF1;EPO;ERBB2;AKT1;ERCC6;EZH2;F2;FGF1;FGF2;FGF9;DKK1;FLT1;SIRT1;FPR2;MTOR;PTPN22;GATA3;GBA;GREM1;MSTN;GH1;ANG;ANGPT1;GPER1;HDAC2;HGF;HLA-DRB1;BIRC2;BIRC3;BIRC5;IFNA1;IFNA13;IFNG;IGF1;CCN1;…	3.61711	1.37451e-53
GOBP_ACTIN_FILAMENT_BASED_PROCESS	ABCC9;MYL9;PDLIM5;CFL1;AKAP13;CCR7;CLDN3;CRK;CSF1R;CSF3;CCN2;S1PR1;EDN1;AIF1;EPHA3;F2RL1;NEDD4L;ALOX15;MTOR;LMOD1;GJA1;ANKRD1;ANG;CXCL1;TMOD3;ANXA1;HCK;IL1A;AQP1;ITGB1;ITGB3;KCNQ1;KRAS;RHOC;RHOG;STMN1;LIMK1;MIR143;MIR145;MIR20A;MIR21;MIR214;TACSTD2;SMAD3;SMAD4;MDK;MET;NTF3;NTRK3;PAK1;PDGFA;PDGFRA;PDGFRB;PIK3CA;WNT4;RHOF;FGD6;PTGER4;ACTA2;RASA1;BCL2;RGS4;ACTB;BCL6;ROCK1;CCL11;CCL21;CX3CL1;SDC4;CXC…	4.0029	1.06498e-52
GOBP_PEPTIDYL_AMINO_ACID_MODIFICATION	CARM1;CTCF;PPARGC1A;BRD8;CHUK;LRRK2;MAPK14;CSF1R;CSF2;CSF3;CSK;IL34;ADRA1A;CTH;CTNNB1;DCN;ACE;DNMT1;DNMT3B;AGT;HBEGF;EGF;EGFR;EGR1;TET3;EPHA3;EPHB2;EPHB4;EPO;ERBB2;AKT1;ERCC6;EZH2;FGFR2;FKBP4;FKBP5;DKK1;NCOA6;FLT1;SIRT1;MTOR;GALNT3;CHD5;GATA2;GATA3;GREM1;GH1;ANGPT1;GSK3B;HCK;HDAC2;HGF;APOA2;IFNA1;IFNA13;IFNG;IGF1;IGF1R;IL2;IL4;IL6;IL7;IL9;IL11;IL12B;IL13;IL15;IL18;ILK;INSR;ITGA5;ITGB3;JAK1;AREG;K…	3.21329	1.49488e-52
GOBP_GROWTH	BCL2L11;CDK4;CDKN1A;CDKN1B;CDKN2A;PAK4;YAP1;SEMA3C;CIB1;AGR2;PDLIM5;AKAP13;ADM;CRABP2;CREB1;MAPK14;CSF1;ADRA1A;CTNNB1;CYP19A1;ARX;DPYSL2;DRD2;AGT;HBEGF;DUSP6;AGTR1;AGTR2;S1PR1;EDN1;EDNRA;MEGF8;EGFR;ENO1;ERBB2;ERCC1;ERCC2;AKT1;ERCC6;ESR1;ESR2;EXTL3;EZH2;F2;FGF1;FGF2;FGF9;FGFR2;FOXO3;PLCB1;NEDD4L;FN1;SIRT1;LPAR3;SH3BP4;MTOR;GATA3;GATA6;GREM1;MSTN;AMH;GH1;GHRH;GHRHR;GJA1;FOXP1;GLI1;GLI3;GSK3B;ANXA1;…	3.74312	2.99667e-52
GOBP_REGULATION_OF_LEUKOCYTE_PROLIFERATION	ADA;CDKN1A;LILRB2;LILRB1;FCRL3;CRP;CSF1;CSF1R;CSF2;IL34;CTLA4;CTNNB1;CD55;AHR;AIF1;EPHB2;EPO;ERBB2;FCGR3A;IL27;PTPN22;GREM1;TNFRSF21;CD274;GSTP1;ANXA1;HLA-DPB1;HLA-DRB1;HLA-G;HMGB1;IGF1;IHH;IL1A;IL1B;IL2;IL2RA;IL4;IL6;IL7;IL10;IL12B;IL12RB1;IL13;IL15;IL18;IDO1;ARG1;LEP;LGALS3;LGALS9;LYN;MIR181C;MIR21;KITLG;MIF;ATM;FOXP3;IL23A;ENPP3;MAPK1;MAPK3;PRLR;PTEN;PTPRC;IL21;BCL2;BCL2L1;BCL6;CCL5;CCL19;SDC4…	8.25132	5.02942e-52
GOBP_MULTICELLULAR_ORGANISMAL_HOMEOSTASIS	CDH3;YAP1;CFTR;PPARGC1A;CLCN3;CNR1;CLDN4;CLDN3;CSF1;CSF1R;CSK;CCN2;CTNNB1;DECR1;DIO2;DRD2;S1PR1;EGR1;ERCC6;ESRRB;ALB;F2R;FOXO1;AKR1B1;FMO2;SIRT1;FSHB;GATA2;GATM;GBA;GJA1;ANGPT1;SLC40A1;ACACA;HOXA13;IAPP;IGF1R;RBPJ;IHH;IL1A;IL1B;IL4;IL6;IL7;AQP1;AQP2;IL13;IL15;IL17A;IL18;ITGB1;ITGB3;KDR;KRAS;STMN1;LEP;LEPR;LTF;MET;MUC2;MUC4;NOS3;NOTCH1;TNFRSF11B;OXTR;PIK3CA;PRKCA;PRLR;B2M;PTGS2;BAX;RB1;BCL2;ACTB;S…	5.03879	6.38295e-52
GOBP_REGULATION_OF_ORGANELLE_ORGANIZATION	BCL2L11;DNM1L;CDKN1B;LILRB2;YAP1;CIB1;CTCF;PPARGC1A;AKAP13;PRRT2;LRRK2;CCR7;CRK;PARP1;CSF1R;CSF2;CSF3;CCN2;CTNNB1;DCN;DNMT1;DUSP1;S1PR1;EDN1;EGF;EPHA3;ERCC1;AKT1;F2RL1;FEN1;FKBP4;PLCB1;NUP62;ALOX15;MTOR;LMOD1;INTU;GPER1;GSK3B;TMOD3;ANXA1;ANXA2;HCK;HGF;HIF1A;HOXA13;BIRC5;IAPP;IGF1;IL1A;IL1B;IL1RAP;INSR;ITGB3;KDR;RHOC;RHOG;STMN1;LIF;LIMK1;MIR20A;MIR21;MIR214;TACSTD2;SMAD3;SMAD4;MAP2;MDK;MECP2;MET;M…	3.28277	8.1345e-52
GOBP_NEURON_DEVELOPMENT	UST;PLXNC1;PAK4;CARM1;SEMA3C;CIB1;PDLIM5;CFL1;CTHRC1;LRRK2;CNR1;ADM;CRABP2;CREB1;CRK;CRMP1;CSF1R;CTNNB1;ARX;DLX5;DPYSL2;DRD2;AGT;EDN1;EDNRA;MEGF8;EPHA3;EPHB2;EPHB4;EPO;NR2F6;ERBB2;AKT1;ERCC6;EZH2;FGFR2;FKBP4;DKK1;PLXND1;NEDD4L;FN1;DICER1;LPAR3;GATA2;GATA3;GBA;GDNF;TNFRSF21;GLI3;MYLIP;GSK3B;HDAC2;HGF;HMGB1;HPRT1;TNC;APOE;IGF1R;IHH;IL2;IL6;ITGB1;JUN;AREG;KCNQ1;HES5;L1CAM;RHOG;LAMB1;LAMC2;STMN1;LEP;…	3.39236	2.46117e-51
GOBP_NEGATIVE_REGULATION_OF_BIOSYNTHETIC_PROCESS	MIR543;TOB1;CDK6;CDKN1A;CDKN1B;CDKN2A;YAP1;FST;CEBPA;TXNIP;KHDRBS1;CTCF;PHB2;OSR2;CREB1;SIRPA;PARP1;CSF2;CTNNB1;DAPK1;DDX5;ARX;DNMT1;DNMT3A;DNMT3B;HBEGF;EDN1;EGR1;AHR;EIF4EBP1;ENO1;EPO;NR2F6;ESR1;ESR2;EZH2;FGF9;FGFR2;ZHX2;DKK1;FOXM1;FOXO1;FOXO3;PLCB1;DICER1;SIRT1;HEY1;GABPA;CHD5;GATA2;GATA3;GATA6;GREM1;FOXD3;ANKRD1;FOXP1;PDCD4;GLI3;ANG;GPER1;NR3C1;GSK3B;GSTP1;DNMT3L;TBX21;HDAC1;HDAC2;HMGB1;HMGA1;…	2.828	3.00178e-51
GOBP_WOUND_HEALING	CDH3;CDKN1A;MYL9;YAP1;HPSE;COL1A1;CPB2;CLDN4;CLDN3;CRK;MAPK14;ADRA2B;HBEGF;EDN1;EPHB2;ERBB2;F2;F2R;F2RL1;F3;FBLN1;FGA;FGF1;FGF2;FGFR2;FN1;ALOX15;MTOR;GATA2;GLI3;ANXA1;ANXA2;HIF1A;FOXA2;IGF1;APOE;CCN1;IL1A;IL6;AQP1;ILK;ITGA2;ITGA5;ITGB1;ITGB3;KDR;KNG1;RHOC;LOX;LYN;MIR17;MIR200B;MIR34A;SMAD2;SMAD3;SMAD4;MMP12;NFE2L2;NOS3;NOTCH4;OPRM1;SERPINE1;SERPINB2;PAK1;PDGFA;PDGFRA;PDGFRB;PF4;PF4V1;SERPINA1;PIK…	5.60587	4.61831e-51
GOBP_ENDOCYTOSIS	DNM1L;LILRB1;CLCN3;LRRK2;ADM;CRP;DPP4;DPYSL2;DRD2;EGF;AHSG;AIF1;EPHA3;F2RL1;DKK1;NEDD4L;SH3BP4;ALOX15;GATA2;GREM1;GH1;ANGPT1;ANXA2;CFI;APOE;IL4;CXCL8;CXCR1;CXCR2;INSR;ITGA2;ITGAM;ITGAV;ITGB1;ITGB3;RHOG;LGALS3;MIR17;MIR205;MIR27B;MBL2;MRC1;NME1;NTF3;SERPINE1;ENPP1;PIK3CB;PIK3CG;TREM2;PPT1;AXL;MAPK1;MAPK3;PSEN1;B2M;ACKR3;CXCL16;BCL2L1;ACTB;ROCK1;SAG;SRL;CCL19;CCL21;SDC1;SELE;SLC2A4;SNCG;SRC;SYP;SYT…	4.43397	5.87191e-51
GOBP_LYMPHOCYTE_MEDIATED_IMMUNITY	KLRC4-KLRK1;RASGRP1;CD226;LILRB1;CRK;CD55;AHR;ERCC1;FCGR3A;KLRK1;CADM1;NCR3;GATA3;MSH6;TBX21;HLA-B;HLA-DPB1;HLA-DQB1;HLA-DRB1;HLA-G;HMGB1;HPRT1;HSPD1;ICAM1;CFI;IL1B;IL1R1;IL2;IL4;IL6;IL7R;IL9;IL10;IL12B;IL12RB1;IL18;KIR2DL4;KIR3DL1;KLRC1;ARG1;LEP;LGALS9;LTA;SH2D1A;MBL2;MLH1;MSH2;FOXP3;IL23A;TREM2;B2M;PTPRC;PVR;IL21;BCL6;STAT6;BTK;TGFB1;SERPING1;TNF;TNFRSF1B;C1R;C3;C5;CCR2;C9;VAV1;ZP3;ULBP3;ULBP2;…	6.45857	8.62485e-51
GOBP_ESTABLISHMENT_OF_PROTEIN_LOCALIZATION	PDCD6;DNM1L;KIF20A;CDKN1A;CIB1;TXNIP;CFTR;HPSE;PHB2;UCN3;LRRK2;CNR1;COL1A1;MAPK14;CSE1L;CSK;DRD2;AGT;EDNRA;EGFR;ELAVL1;ERBB2;AKT1;F2R;F2RL1;FGA;FGF9;FOXO1;NUP210;ASTN2;NUP62;NECTIN3;ANKRD1;GLI3;ANG;ANGPT1;GPER1;CCDC22;GSK3B;ANXA1;HIF1A;HK1;HLA-DRB1;FOXA2;HSPA4;HSPD1;IFI27;IFIT1;IFNG;IGF1;APOE;TICAM2;IL1A;IL1B;IL1RN;IL6;IL12B;IL13;ITGA2;ITGAM;USP17L2;LEP;LHCGR;MIR148A;MIR17;MIR30C1;SMAD2;SMAD3;MDM…	2.8408	8.70387e-51
GOBP_TISSUE_MORPHOGENESIS	YAP1;FST;SEMA3C;PHB2;CTHRC1;ADM;CSF1;CSF1R;CTNNB1;DLX3;AGT;HBEGF;AGTR2;S1PR1;EDN1;EDNRA;EGF;MEGF8;EGFR;ESR1;FGF1;FGF2;FGFR2;DKK1;PLXND1;ASTN2;HEY1;MTOR;GATA3;GREM1;GDNF;GJA1;ANKRD1;FOXP1;INTU;GLI3;NR3C1;HGF;HIF1A;HOXA11;HOXA13;HOXB4;TNC;CCN1;RBPJ;IHH;CXCR2;IL10;ILK;INHBA;CXCL10;AR;ITGA2;ITGA5;ITGB1;ITGB3;AREG;KDR;KRAS;HES5;RHOC;LIF;MIR143;MIR145;MIR195;MIR200C;MIR21;TACSTD2;SMAD2;SMAD3;SMAD4;MDK;…	4.48668	8.93757e-51
GOBP_EMBRYONIC_MORPHOGENESIS	BCL2L11;TSHZ1;YAP1;CTHRC1;OSR2;ADM;CRABP2;CTNNB1;DLX5;DUSP1;DUSP2;EDN1;EDNRA;MEGF8;EPHB2;FBN1;FGF2;FGF9;FGFR2;DKK1;FLT1;FN1;GATA2;GATA3;GATA6;GREM1;GDNF;GJA1;INTU;GLI1;GLI3;HDAC1;HDAC2;HIF1A;FOXA2;HOXA10;HOXA11;HOXA13;HOXB4;ID2;CCN1;IHH;IL1RN;IL10;INHBA;AR;ITGA2;ITGA5;ITGAV;ITGB1;ITGB3;KCNQ1;HES5;LAMB1;MIR145;MIR200C;SMAD2;SMAD3;SMAD4;MMP2;MMP9;MMP14;NOTCH1;YBX1;PAX2;PDGFRA;WNT4;DLL4;POU5F1;MED1;…	4.56911	1.27051e-50
GOBP_CHEMICAL_HOMEOSTASIS	ABCB6;CEBPA;CETP;CFTR;PPARGC1A;CLCN3;LRRK2;CCR1;CCR5;CCR7;CNR1;ADM;CPB2;CLDN4;TTC39B;ACE;AKR1C1;DRD2;AGT;AGTR1;EDN1;EDNRA;AKT1;F2;F2R;FGF2;FOXO1;FOXO3;AKR1B1;SIRT1;SLC7A8;NR5A2;GBA;GHRHR;GPER1;CCDC22;MYLIP;GSTM2;GSTP1;SLC40A1;HIF1A;HK1;ACACA;HLA-DRB1;FOXA2;APOA2;ICAM1;IFIT1;IFNG;APOE;IGF1R;IL1A;FASLG;IL6;AQP1;AQP2;IL13;IL18;CXCL10;INSR;ITGB3;KCNQ1;KDR;STMN1;LEP;LEPR;LHCGR;LIPC;LTF;LYN;MIR132;MIR1…	3.44032	1.41792e-50
GOBP_NEGATIVE_REGULATION_OF_RNA_METABOLIC_PROCESS	TOB1;CDK6;CDKN1B;CDKN2A;YAP1;FST;CEBPA;TXNIP;KHDRBS1;CTCF;PHB2;OSR2;CREB1;PARP1;MAPK14;CSF2;CTNNB1;DDX5;ARX;DNMT1;DNMT3A;DNMT3B;EDN1;EGR1;AHR;ELAVL1;ENO1;EPO;NR2F6;ESR1;ESR2;EZH2;FGF9;FGFR2;ZHX2;DKK1;FOXM1;FOXO1;FOXO3;PLCB1;DICER1;SIRT1;HEY1;GABPA;CHD5;GATA2;GATA3;GATA6;GREM1;GDNF;FOXD3;ANKRD1;FOXP1;PDCD4;GLI3;NR3C1;DNMT3L;TBX21;HDAC1;HDAC2;HMGB1;HMGA1;HOXB4;APEX1;BIRC5;ID2;IFI27;IFNG;RBPJ;FASLG;…	3.02173	2.24109e-50
GOBP_MONONUCLEAR_CELL_MIGRATION	KLRC4-KLRK1;CXCL13;CCR1;CCR5;CCR7;CD200R1;CRK;SIRPA;CSF1;CSF1R;IL34;CX3CR1;DUSP1;S1PR1;AIF1;AKT1;KLRK1;FLT1;PLCB1;FPR2;GATA3;GBA;GREM1;MSTN;TBX21;ANXA1;HMGB1;ICAM1;IL4;IL6;CXCR1;CXCR2;CXCL10;ITGB3;LGALS3;LGALS9;LYN;MDK;CD200;SERPINE1;PIK3CD;PIK3CG;PLG;MAPK1;MAPK3;CXCL16;RARRES2;CCL1;CCL2;CCL5;CCL11;CCL14;CCL16;CCL17;CCL19;CCL21;CCL22;CCL25;CX3CL1;CXCL12;WNK1;ADAM17;THBS1;TNF;CCR2;CXCR4;CALCA;ARTN…	9.95852	3.34554e-49
GOBP_REGULATION_OF_RESPONSE_TO_BIOTIC_STIMULUS	KLRC4-KLRK1;RASGRP1;ADAR;NOD1;CD226;LILRB1;CRK;PARP1;CD55;DAPK1;DRD2;AHR;F2RL1;KLRK1;FPR2;CADM1;IL27;NCR3;PTPN22;GATA6;FOXP1;CD274;HCK;HLA-B;HLA-DRB1;HLA-G;HMGB1;BIRC2;BIRC3;HSPD1;IFIT1;APOE;IL1B;IL4;IL12B;IL12RB1;IL15;IL17A;USP17L2;KIR2DL4;KLRC1;ARG1;LEP;LGALS9;LTF;LYN;SH2D1A;MIR21;MBL2;MIF;MMP12;NFE2L2;PAK1;FOXP3;HERC5;IL23A;TREM2;PPARG;MED1;PRKCA;MAPK3;HTRA1;PVR;IL21;CCL5;CX3CL1;SRC;TLR4;SERPI…	6.24733	7.39349e-49
GOBP_CELLULAR_RESPONSE_TO_BIOTIC_STIMULUS	BCL2L11;KLRC4-KLRK1;CDK4;LILRB2;CXCL13;TXNIP;LILRB1;CCR5;SIRPA;MAPK14;CSF2;CSF3;CX3CR1;CD55;EPHB2;AKT1;KLRK1;PTPN22;ANKRD1;IL37;PDCD4;CD274;CXCL1;GSK3B;GSTP1;HCK;HMGB1;TICAM2;IL1A;IL1B;IL6;CXCL8;IL10;IL12B;IL18;CXCL10;ARG1;LTF;LYN;MIR17;MIR20A;MIR21;MIF;CXCL9;MRC1;MIR342;NFKB1;NFKBIA;NOS2;NOS3;NOTCH1;SERPINE1;PF4;PF4V1;TREM2;PRKCA;AXL;MAPK1;MAPK3;MAPK8;MAP2K7;RELA;CCL2;CCL5;CXCL5;CX3CL1;SRC;BTK;T…	7.91625	3.34249e-48
GOBP_NEGATIVE_REGULATION_OF_RESPONSE_TO_EXTERNAL_STIMULUS	ADA;KLRC4-KLRK1;ADAR;SEMA3C;CXCL13;LILRB1;CD200R1;CPB2;CLDN3;CRK;SIRPA;PARP1;MAPK14;CYP19A1;DPP4;DRD2;DUSP1;EDN1;AIF1;F2;FGA;FGF2;KLRK1;FPR2;GATA3;GBA;GREM1;ANGPT2;GPER1;GSTP1;ANXA2;HCK;HGF;HLA-B;HLA-DRB1;HLA-G;IGF1;APOE;IL2;IL2RA;IL4;IL10;IL12B;IL13;KIR2DL4;KLRC1;KNG1;ARG1;LEP;LGALS9;LTF;LYN;MIR126;MIR141;MIR142;MIR145;MIR181C;MIR195;MIR20A;MIR200B;MIR204;MIR205;MIR21;MIR30C2;MIR31;MIR34A;SMAD3;…	5.43029	7.30968e-48
GOBP_REGULATION_OF_LEUKOCYTE_MIGRATION	ADA;KLRC4-KLRK1;DNM1L;OLFM4;CXCL13;CCR1;CCR7;CD200R1;CRK;CSF1;CSF1R;IL34;CX3CR1;CYP19A1;DPP4;DUSP1;EDN1;AIF1;AKT1;F2RL1;KLRK1;PLCB1;FPR2;DAPK2;GREM1;MSTN;CXCR3;ANXA1;HMGB1;ICAM1;IL1A;IL1R1;IL4;IL6;CXCL8;CXCR2;CXCL10;ITGA2;ITGB3;RHOG;LGALS3;LGALS9;LYN;MDK;KITLG;MIF;MMP14;CD200;SERPINE1;IL23A;PGF;TREM2;MAPK1;MAPK3;PTGER4;PTN;RARRES2;CCL1;CCL2;CCL5;CCL19;CCL21;CCL25;CX3CL1;CXCL12;SELE;WNK1;ADAM17;TA…	8.67468	8.15638e-48
GOBP_RESPONSE_TO_VIRUS	ABCC9;CDK6;ADAR;CFL1;LILRB1;PHB2;CHUK;MAPK14;CYP1A1;ENO1;F2RL1;IL27;PTPN22;GATA3;TBX21;HIF1A;BIRC2;BIRC3;IFI27;IFIT1;IFNA1;IFNA13;IFNG;IFNGR1;IL1B;IL4;IL6;IL12B;IL12RB1;IL15;CXCL10;ISG20;ITGB8;JAK1;USP17L2;STMN1;LGALS9;MIR21;MIR30C1;SMAD3;MBL2;CXCL9;MMP12;MST1R;NFKB1;FOXP3;HERC5;IL23A;ATAD3A;HTRA1;PTPRC;BAX;ACTA2;IL21;BCL2;RELA;BCL2L1;CCL5;CCL11;CCL19;CCL22;CXCL12;SKP2;SRC;TLR2;TLR3;TNF;TPT1;TYK2…	5.62634	1.17994e-47
GOBP_ACTIVATION_OF_IMMUNE_RESPONSE	ADA;KLRC4-KLRK1;KHDRBS1;CD226;PHB2;FCRL3;CCR7;CSK;CTLA4;CD55;CFD;KLRK1;FPR1;FPR2;NCR3;PTPN22;GATA3;FOXP1;TNFRSF21;HCK;HLA-DPB1;HLA-DQB1;HLA-DRB1;HMGB1;CFI;IL1B;LGALS3;LIMK1;LYN;SH2D1A;MIR34A;MBL2;PAK1;FOXP3;PIK3CA;PIK3CD;TREM2;PRKCB;MAPK1;PSEN1;PTPRC;BAX;BCL2;RELA;WNK1;SRC;BRAF;BTK;THY1;TLR4;SERPING1;C1R;C3;C5;TYROBP;C9;VAV1;EZR;BAG6;CARD11;SKAP1;BCL10;CD19;MS4A1;CD47;CD79A	5.80615	1.56926e-47
GOBP_REGULATION_OF_PROTEIN_KINASE_ACTIVITY	RASGRP1;CDKN1A;CDKN1B;CDKN2A;ADAR;CDKN3;CEBPA;CIB1;AKAP13;PHB2;CKS1B;LRRK2;CCR7;CSF1;CSF1R;CSK;IL34;ADRA1A;ADRA2B;ACE;DRD2;AGT;HBEGF;DUSP1;EDN1;EGF;EGFR;EGR1;EPHB2;EPO;ERBB2;AKT1;ERCC6;EZH2;FGF1;FGF2;DKK1;FLT1;SIRT1;NUP62;MTOR;PTPN22;GBA;GREM1;GH1;PDCD4;ANG;ANGPT1;GSTP1;GTF2H1;HGF;IFNG;IGF1;APOE;CCN1;IL1B;IL4;IL12B;IL18;INSR;ITGB3;AREG;LEP;LTF;LYN;MIR143;MIR20A;MIR21;MIR34A;MAS1;KITLG;MIF;MNAT1;M…	4.16634	2.3569e-47
GOBP_HEAD_DEVELOPMENT	BCL2L11;ABCB6;CDK6;OSR2;LRRK2;COL1A1;CREB1;CRK;CSF1R;CSK;CTNNB1;CX3CR1;ACE;ARX;DLX5;DPYSL2;DRD2;AGTR2;S1PR1;EDNRA;EGF;EGFR;AIF1;EMX2;EPHB2;EPOR;EZH2;FANCD2;FGF2;FGF9;FGFR2;DKK1;NCOA6;FOXO3;PLCB1;CADM1;CADM2;CHD5;GATA2;GBA;GHRH;GHRHR;FOXP1;GLI1;GLI3;GSK3B;H2AX;HDAC1;HIF1A;HPRT1;HSD3B1;HSD3B2;ID2;IGF1R;RBPJ;IHH;CXCR2;AQP1;INHBA;ITGAM;ITGB1;KRAS;HES5;LAMB1;MAOB;MAS1;MDK;MECP2;MMP2;MMP14;MNAT1;ATM;NO…	3.76325	4.49273e-47
GOBP_TRANSMEMBRANE_TRANSPORT	ABCB6;ABCC9;ABCC4;MTCO2P12;CFTR;HPSE;SCN11A;CHRM3;PHB2;CLCN3;ANO4;CCR5;CCR7;SLCO6A1;CLDN4;CRH;CRHR1;MAPK14;ADRA1A;CCN2;CNIH3;CYB5A;DAPK1;ACE;DPP6;DRD2;AGT;EDN1;EDNRA;EPHB2;EPO;AKT1;F2;F2R;FGF2;NEDD4L;SLC7A8;GC;GH1;GJA1;GJB2;GPER1;REM1;GSTM2;SLC40A1;ANXA2;HSPD1;IFNG;IGF1;IL1B;FASLG;AQP1;AQP2;IL13;AQP5;CXCL10;INSR;AQP9;ITGAV;ITGB1;ITGB3;KCNQ1;KCNQ2;ARG1;LEP;LHCGR;LYN;MIR143;MIR200C;MIR21;MIR210;MIR…	2.80503	5.91906e-47
GOBP_APOPTOTIC_SIGNALING_PATHWAY	PDCD6;BCL2L11;DNM1L;CDKN1A;YAP1;CIB1;LRRK2;PARP1;CSF2;CTH;CTNNB1;CX3CR1;CYP1B1;DAPK1;DDX5;AGT;AGTR2;ENO1;EPO;AKT1;ERCC6;FGA;FOXO3;SIRT1;DAPK2;GDNF;GPER1;PDIA3;GSK3B;GSTP1;MSH6;HDAC1;HGF;HIF1A;ICAM1;IFI27;IFNG;IGF1;FAS;IL1A;IL1B;IL2;FASLG;IL4;IL7;IL9;INHBA;AR;ITGAM;ITGAV;LGALS3;MIR132;MIR17;MIR21;MIR210;MIR27B;SMAD3;MDM2;KITLG;MIF;MLH1;MMP9;MSH2;MUC1;MYC;ATM;NFE2L2;NGF;NGFR;NOS3;SERPINE1;PF4;PIK3C…	4.4194	5.93769e-47
GOBP_T_CELL_DIFFERENTIATION	ADA;RASGRP1;CDK6;LILRB2;CCR9;CCR7;CTLA4;CTNNB1;EGR1;ERBB2;FANCD2;FOXO3;IL27;MTOR;PTPN22;GATA3;GBA;FOXP1;GLI3;TBX21;ANXA1;HLA-DRB1;HLA-G;HMGB1;IFNG;IHH;IL1A;IL1B;IL2;IL2RA;IL4;IL6;IL7;IL7R;IL12B;IL12RB1;IL15;IL18;KLRC1;LEP;LEPR;LGALS9;MIR21;MDK;MYB;FOXP3;IL23A;PIK3CD;WNT4;DLL4;B2M;PTGER4;PTPRC;IL21;BCL2;ACTB;BCL6;CCL19;BMP4;SMARCC1;SOD1;BRAF;STAT3;STAT6;ADAM17;ZEB1;TP53;CCR2;VAV1;XBP1;ARID1A;FZD7;…	7.00242	7.88789e-47
GOBP_REGULATION_OF_CELLULAR_LOCALIZATION	DNM1L;YAP1;CIB1;AGR2;KHDRBS1;CFTR;UCN3;LRRK2;CNR1;PARP1;MAPK14;CSK;CTNNB1;DRD2;EDNRA;EGF;EGFR;EPHA3;EPHB2;EPO;ERBB2;AKT1;F2;F2R;F2RL1;FGA;FOXO1;ASTN2;NEDD4L;NUP62;ANKRD1;GLI3;ANG;ANGPT1;GPER1;GSK3B;ANXA2;HIF1A;HLA-DRB1;FOXA2;IFI27;IFNG;IGF1;APOE;IL1A;IL1B;IL6;IL12B;IL13;AR;ITGAM;ITGB1;ITGB3;USP17L2;RHOG;LEP;LGALS3;LHCGR;LIF;MIR148A;MIR17;MIR210;MIR27B;MIR30C1;SMAD3;MAP2;MMP14;CD200;NGFR;NOS1;NOS2…	3.47333	8.28111e-47
GOBP_REGULATION_OF_INFLAMMATORY_RESPONSE	ADA;CEBPA;LRRK2;CCR7;CNR1;CD200R1;SIRPA;MAPK14;CYP19A1;ACE;AGT;AGTR1;AHSG;ESR1;ETS1;FANCD2;FPR2;ALOX15;GATA3;GBA;FOXP1;IL37;PDCD4;GPER1;GPX4;GSTP1;ANXA1;HCK;HGF;HLA-DRB1;BIRC2;BIRC3;TNC;IFNG;IGF1;APOE;IL1B;IL1R1;IL2;IL2RA;IL4;IL6;IL10;IL12B;IL13;IL15;IL16;IL18;IDO1;ITGA2;LGALS1;LTA;LYN;MIR126;MIR141;MIR142;MIR145;MIR181C;MIR195;MIR20A;MIR204;MIR205;MIR21;MIR22;MIR30C2;MIR31;SMAD3;MAS1;MDK;MMP3;MM…	5.50214	8.34403e-47
GOBP_REGULATION_OF_VESICLE_MEDIATED_TRANSPORT	OLFM4;CFTR;LILRB1;PRRT2;LRRK2;CNR1;SIRPA;CSK;ADRA1A;DRD2;EGF;AHSG;EPHA3;F2RL1;FGA;DKK1;NEDD4L;FPR2;ALOX15;GATA2;GREM1;GH1;ANGPT1;GSK3B;ANXA1;ANXA2;HCK;HMGB1;APOA2;IFNG;APOE;IL1B;IL2RB;IL4;IL13;IL15;INSR;ITGA2;ITGAM;ITGAV;ITGB3;LGALS3;LGALS9;LYN;MIR17;MIR183;MIR20A;MIR205;MIR27B;MBL2;NOTCH1;NTF3;SERPINE1;PIK3CB;TREM2;PPT1;PRKCB;AXL;VPS11;MAPK1;MAPK3;MAP2K1;PSEN1;B2M;PTPRC;ROCK1;CCL2;CCL19;CCL21;SD…	4.63977	8.61705e-47
GOBP_POSITIVE_REGULATION_OF_IMMUNE_EFFECTOR_PROCESS	KLRC4-KLRK1;RASGRP1;NOD1;CD226;LILRB1;PHB2;CD55;EPHB2;F2RL1;KLRK1;SIRT1;CADM1;NCR3;PTPN22;GATA2;GATA3;TBX21;ANXA1;HK1;HLA-B;HLA-DRB1;HLA-G;HSPD1;IFNG;IL1B;IL1R1;IL2;IL4;IL6;IL10;IL12B;IL12RB1;IL13;IL17A;IL18;ITGAM;USP17L2;KIR2DL4;ARG1;LGALS9;LTA;LYN;SH2D1A;MIR21;MBL2;MIF;MLH1;MSH2;MYB;NOS2;FOXP3;IL23A;ENPP3;TREM2;B2M;PTPRC;PVR;IL21;CCL19;STAT6;BTK;TGFB1;TLR3;TLR4;TNF;C3;CCR2;TYROBP;VAV1;XBP1;ZP3;…	7.63768	1.01689e-46
GOBP_REGULATION_OF_PROTEOLYSIS	PDCD6;BCL2L11;NOD1;CEBPA;LRRK2;CPB2;CLDN4;CLDN3;CCN2;DAPK1;AGT;EGF;AHSG;ENO1;AKT1;F2;F2R;F3;FBLN1;FN1;SIRT1;RNF19A;GBA;GPER1;CCDC22;GSK3B;ANXA2;HDAC1;HDAC2;HGF;HMGB1;NR4A1;BIRC2;BIRC3;BIRC5;HSPD1;IFNG;APOE;CCN1;FAS;IL1B;FASLG;IL9;AQP1;IL10;USP17L2;KNG1;LGALS9;LPA;LTF;LYN;MIRLET7B;MIR126;MIR17;MIR195;MIR205;MIR21;MIR27B;MIR29C;SMAD3;MDM2;MMP9;MMP14;MYC;NFE2L2;NGF;NGFR;SERPINE1;SERPINB2;PAX2;SERPIN…	3.89889	1.48134e-46
GOBP_RESPONSE_TO_PEPTIDE	BCL2L11;CDK4;CDKN1B;NOD1;COL1A1;ADM;CREB1;CRHR1;CRHR2;CRK;PARP1;MAPK14;CSK;CCN2;CYP1B1;CYP11A1;AGRP;AGT;AGTR1;AGTR2;EDN1;EDNRA;EGR1;AHSG;EPHB2;AKT1;FBN1;FOXO1;FOXO3;PLCB1;SIRT1;FOS;FPR2;MTOR;NR5A1;PTPN22;MSTN;GH1;GHRHR;GJA1;GJB2;GNRHR;GPER1;GSK3B;ANXA1;NR4A1;APEX1;HSD11B2;ICAM1;IGF1;IGF1R;IGFBP1;IL1B;IL10;INHBA;INSR;ITGB3;JAK1;AREG;KCNQ1;ARG1;LEP;LHCGR;LYN;MIR143;MIR145;MIR195;MIR200A;MIR200C;MAS…	4.78417	3.34705e-46
GOBP_CELLULAR_RESPONSE_TO_HORMONE_STIMULUS	SRA1;BCL2L11;CDK4;YAP1;CARM1;BRD8;PHB2;UCN3;CRHR1;CRHR2;CRK;PARP1;CSF1;CSK;CYP1B1;CYP11A1;ACE;AKR1C1;AKR1C2;DDX5;AGRP;AGT;AGTR1;AGTR2;EDN1;EDNRA;AHSG;AIF1;AKT1;ESR1;ESR2;ESRRB;FBN1;FKBP4;FOXO1;FOXO3;PLCB1;SIRT1;FOS;FSHR;NR5A2;NR5A1;GATA6;MSTN;GH1;GHRHR;GJB2;FOXP1;GNRHR;GPER1;NR3C1;GSK3B;GTF2H1;ANXA1;HDAC1;ACACA;NR4A1;APEX1;IGF1R;IGFBP1;IGFBP7;IL1B;AQP1;INHBA;INSR;AR;ITGB3;JAK1;ARG1;LEP;LEPR;LHB;L…	4.37626	5.44561e-46
GOBP_TRANSMEMBRANE_RECEPTOR_PROTEIN_TYROSINE_KINASE_SIGNALING_PATHWAY	CDH3;PDCD6;CDK4;AGR2;TXNIP;COL1A1;CRK;MAPK14;CSF1;CSF1R;CCN2;CTNNB1;DCN;DOK1;AGT;HBEGF;AGTR2;EGF;EGFR;AHSG;EPHA3;EPHB2;EPHB4;ERBB2;AKT1;F3;FGF1;FGF2;FGF9;FGFR2;FOXO1;FLT1;PLCB1;SIRT1;NUP62;GALNT3;GATA3;GREM1;MSTN;GH1;GHRH;GHRHR;ANGPT1;ANGPT2;GPER1;GSK3B;HCK;HGF;HIF1A;IGF1;IGF1R;IGFBP1;IGFBP3;IGFBP6;RBPJ;IL1B;FASLG;IL12B;INSR;AR;ITGA5;ITGB3;JAK1;AREG;KDR;STMN1;LEP;LOX;ARNT;LYN;MIR10B;MIR195;MIR200…	4.19296	5.63038e-46
GOBP_NEGATIVE_REGULATION_OF_CELL_ADHESION	PLXNC1;LILRB2;CDKN2A;LILRB1;COL1A1;CLDN7;CTLA4;CYP1B1;DUSP1;EPHB2;ERBB2;AKT1;FBLN1;PLXND1;PTPN22;TNFRSF21;GLI3;ANGPT1;ANGPT2;CD274;TBX21;ANXA1;HLA-DRB1;HLA-G;HMGB1;IHH;IL1RN;IL2;IL2RA;IL4;IL10;IDO1;KNG1;ARG1;LGALS3;LGALS9;MIR141;MIR181C;MIR183;MIR21;TACSTD2;MIR29C;MIR31;EPCAM;MDK;MMP2;MMP12;MMP14;MUC1;NOTCH1;NOTCH4;SERPINE1;FOXP3;PLG;PPARA;PTEN;MIR503;SEMA6A;PTPRC;RASA1;BCL6;CCL21;CCL25;CX3CL1;SD…	6.61741	2.08962e-45
GOBP_SKELETAL_SYSTEM_DEVELOPMENT	CDX1;FST;LILRB1;AKAP13;OSR2;COL1A1;MAPK14;VCAN;CCN2;CTNNB1;DLX5;EDN1;EDNRA;MEGF8;AHSG;FBN1;FGF2;FGF9;FGFR2;GREM1;GH1;GJA1;FOXP1;GLI3;ANXA2;HIF1A;HOXA10;HOXA11;HOXA13;HOXB4;HSD17B1;IGF1;CCN1;IHH;INHA;ITGB8;KDR;HES5;LEP;LEPR;LOX;LTF;MIR21;SMAD2;SMAD3;MDK;MMP2;MMP9;MMP13;MMP14;TNFRSF11B;PDGFRA;MED1;BNC2;PRELP;MAPK3;SULF2;ANKH;PSEN1;PTGER4;PTPRC;RARB;RB1;SFRP1;SFRP2;BMP4;BMP7;BMPR1B;SNAI2;SNAI1;SOX9;…	4.59388	2.78508e-45
GOBP_BEHAVIOR	ADA;LILRB2;CLCN3;LRRK2;CNR1;CREB1;CRH;CRHR1;PARP1;CSF2;CX3CR1;ACE;DPP4;AGRP;DRD2;AGT;AGTR2;EGFR;EGR1;EPHB2;AKT1;FEN1;DKK1;PLCB1;FOS;MTOR;GATM;GBA;GDNF;GHRH;GHRHR;HPGDS;GLI3;NR3C1;HDAC2;HIF1A;FOXA2;HPRT1;IAPP;ID2;APOE;IDO1;INSR;ITGA5;ITGB1;KCNQ1;KRAS;LEP;LEPR;MDK;MECP2;MME;NGF;NTF3;NTF4;NTRK2;OPRM1;OXTR;P2RX3;SERPINF1;TREM2;PPARA;PPT1;MAPK1;ANKH;PSEN1;B2M;RETN;PTEN;PTGS2;PTN;BCL2;REN;BDNF;S100B;CC…	4.19487	4.99056e-45
GOBP_NEGATIVE_REGULATION_OF_PROTEIN_METABOLIC_PROCESS	MIR543;TOB1;CDKN1A;CDKN1B;LILRB2;CDKN2A;ADAR;CEBPA;CIB1;LRRK2;CPB2;SIRPA;CTNNB1;DAPK1;DNMT1;DNMT3B;DRD2;AGT;HBEGF;DUSP1;DUSP6;EDN1;EGFR;AHSG;EIF4EBP1;EPHB2;AKT1;F2;FBLN1;DKK1;SIRT1;NUP62;PTPN22;GBA;GREM1;PDCD4;ANG;ANGPT1;GSK3B;GSTP1;ANXA2;HDAC2;HGF;NR4A1;BIRC2;BIRC3;BIRC5;IAPP;IFNG;IGF1;APOE;IGFBP3;IL1B;IL2;IL9;AQP1;IL10;EIF3E;ITGAV;ITGB3;JUN;USP17L2;KNG1;LGALS3;LIMK1;LPA;LTF;LYN;MIRLET7B;MIR100;…	3.11817	2.9526e-44
GOBP_REGULATION_OF_SECRETION	ADA;DNM1L;CFTR;LILRB1;UCN3;LRRK2;CNR1;CPB2;CREB1;CRH;CRHR1;ADRA1A;ADRA2B;CYP19A1;ACE;DRD2;AGT;AGTR1;EDN1;EGF;F2R;F2RL1;FGA;FOXO1;GATA2;GDNF;GHRH;GHRHR;GJA1;ANKRD1;ANG;GPER1;GSK3B;ANXA1;ANXA2;HIF1A;HLA-DRB1;FOXA2;IFNG;IGF1;APOE;IL1A;IL1B;IL4;IL6;AQP1;IL11;IL12B;IL13;INHA;INHBA;ITGAM;KCNQ1;KISS1;LEP;LGALS9;LIF;LYN;MIR17;MIR30C1;MIR33A;SMAD4;MAOB;MIF;CD200;NOS2;NOTCH1;OPRM1;OXTR;TREM2;KRT20;PPARG;PR…	4.16315	3.40465e-44
GOBP_INTRACELLULAR_TRANSPORT	PDCD6;BCL2L11;RASGRP1;CDKN1A;CIB1;TXNIP;KHDRBS1;AKAP13;PHB2;LRRK2;MAPK14;CSE1L;AGT;ELAVL1;ERBB2;AKT1;FGF9;KIFAP3;NUP210;NUP62;INTU;GLI3;ANGPT1;ANK1;CCDC22;GSK3B;ANXA2;HIF1A;HSPA4;HSPD1;IFI27;IFNG;APOE;TICAM2;IL1B;ITGAM;USP17L2;LEP;LHCGR;LMNB1;MIR17;MIR27B;MIR29C;SMAD3;MAP2;MMP12;NFKBIA;NGFR;NOTCH1;TMED7;VTA1;MED1;VPS53;SYBU;VPS11;MAPK1;MAPK3;MAPK8;MAP2K1;PSEN1;PTGS2;BAX;BCL2;BCL2L1;SRL;ATG3;SLC1A…	2.71883	4.95876e-44
GOBP_REGULATION_OF_LEUKOCYTE_MEDIATED_IMMUNITY	KLRC4-KLRK1;RASGRP1;CD226;LILRB1;CRK;CX3CR1;CD55;AHR;F2RL1;KLRK1;CADM1;NCR3;GATA2;GATA3;TBX21;HLA-B;HLA-DRB1;HLA-G;HMGB1;HSPD1;ICAM1;IL1B;IL1R1;IL2;IL4;IL6;IL7R;IL10;IL12B;IL12RB1;IL13;IL18;ITGAM;KIR2DL4;KLRC1;ARG1;LEP;LGALS9;LTA;LYN;SH2D1A;MLH1;MSH2;NOS2;FOXP3;IL23A;TREM2;B2M;PTPRC;PVR;IL21;BCL6;STAT6;BTK;TGFB1;TLR3;TLR4;TNF;TNFRSF1B;C3;CCR2;TYROBP;VAV1;ZP3;IL18R1	7.71526	1.02443e-43
GOBP_GLAND_DEVELOPMENT	ADA;BCL2L11;CDKN1B;CEBPA;SEMA3C;MTCO2P12;PHB2;CPB2;CREB1;CRH;CRHR1;CSF1;CSF1R;CTNNB1;CYP1A1;CYP1B1;CYP19A1;DRD2;EDN1;EDNRA;EGF;EGFR;AKT1;ESR1;EZH2;FGF1;FGF2;FGFR2;FKBP4;PLXND1;CADM1;NR5A1;GATA2;GATA3;GATA6;GHRH;GHRHR;GLI1;GLI3;NR3C1;ANXA1;HGF;HIF1A;HOXA10;HOXA11;HOXA13;TNC;ID2;RBPJ;IHH;IL6;IL10;INSR;AR;ITGA2;JUN;AREG;ARG1;SMAD2;SMAD3;SMAD4;MDK;MET;MMP2;ATM;NFKB1;NME1;NOTCH1;NOTCH4;OXTR;PCNA;PDGFA…	5.02641	2.46032e-43
GOBP_RESPONSE_TO_INORGANIC_SUBSTANCE	ADA;PDCD6;ABCB6;CDKN1B;NDRG1;CEBPA;TXNIP;CHUK;LRRK2;CCR7;COL1A1;CREB1;CRK;SIRPA;PARP1;CSF2;CYP1A1;CYP1A2;CYP1B1;DNMT3A;DRD2;EDN1;EGFR;ERCC1;AKT1;ERCC6;EZH2;FGA;FOXO1;FOXO3;PLCB1;SIRT1;FOS;ALOX15;FOXP1;SLC40A1;ANXA1;HDAC2;HGF;HIF1A;HP;APEX1;HSD17B1;IL1A;IL6;AQP1;IL10;AQP2;IMPA2;JUN;AREG;KDR;ARG1;MIRLET7B;MIR17;MIR21;MIR34A;MAOB;MET;MMP2;MMP3;MMP9;MNAT1;MPO;MIR342;NFE2L2;NOS3;NT5E;OGG1;TNFRSF11B;PA…	4.35049	6.10086e-43
GOBP_CELLULAR_RESPONSE_TO_NITROGEN_COMPOUND	BCL2L11;CDK4;NOD1;CFTR;CHRM3;LRRK2;COL1A1;CRHR1;CRHR2;CRK;PARP1;CSK;CTNNB1;CYP1B1;CYP11A1;DNMT1;DNMT3A;DRD2;AGT;AGTR1;AGTR2;EDN1;EDNRA;EGFR;EGR1;AHR;AHSG;AIF1;EPHB2;AKT1;EZH2;FBN1;FOXO1;FOXO3;PLCB1;SIRT1;FOS;FPR2;SH3BP4;MTOR;GABPA;PTPN22;MSTN;GH1;GHRHR;GJA1;GJB2;GNRHR;GPER1;GSK3B;GSTM2;HDAC2;NR4A1;APEX1;ICAM1;IFIT1;IGF1;IGF1R;IGFBP1;IL1B;AQP1;INHBA;INSR;AQP9;ITGB3;JAK1;JUN;KCNQ1;ARG1;LEP;LHCGR;LY…	3.81713	7.3272e-43
GOBP_REGULATION_OF_ADAPTIVE_IMMUNE_RESPONSE	ADA;CD226;LILRB1;CD55;AHR;EPHB2;SIRT1;ALOX15;IL27;GATA3;CD274;TBX21;ANXA1;HLA-B;HLA-DRB1;HLA-G;HMGB1;HSPD1;IL1B;IL1R1;IL2;IL4;IL6;IL7R;IL10;IL12B;IL12RB1;IL18;KLRC1;ARG1;LTA;MIR21;MLH1;MSH2;FOXP3;IL23A;TREM2;B2M;PTPRC;PVR;BCL6;CCL19;STAT6;BTK;TGFB1;TNF;TNFRSF1B;C3;CCR2;TYK2;ZP3;SKAP1;IL18R1;IL33;CD48	8.95621	8.50472e-43
GOBP_GRANULOCYTE_MIGRATION	DNM1L;OLFM4;CXCL13;CCR7;CSF1;CSF1R;IL34;DPP4;EDN1;DAPK2;MSTN;CXCL1;ANXA1;IL1A;IL1B;IL1R1;IL4;CXCL8;CXCR1;CXCR2;IL17A;CXCL10;RHOG;LGALS3;MDK;CXCL9;IL23A;PF4;PF4V1;PIK3CD;PIK3CG;MAPK1;MAPK3;PTGER4;RARRES2;CCL1;CCL2;CCL5;CCL11;CCL14;CCL16;CCL17;CCL19;CCL21;CCL22;CCL25;CXCL5;CX3CL1;BSG;TGFB2;THBS1;VAV1;SLIT2;CD74	11.0014	1.35354e-42
GOBP_GRANULOCYTE_CHEMOTAXIS	DNM1L;CXCL13;CCR7;CSF1;CSF1R;IL34;DPP4;EDN1;DAPK2;MSTN;CXCL1;ANXA1;IL1B;IL4;CXCL8;CXCR1;CXCR2;CXCL10;LGALS3;MDK;CXCL9;IL23A;PF4;PF4V1;PIK3CD;PIK3CG;MAPK1;MAPK3;RARRES2;CCL1;CCL2;CCL5;CCL11;CCL14;CCL16;CCL17;CCL19;CCL21;CCL22;CCL25;CXCL5;CX3CL1;BSG;TGFB2;THBS1;VAV1;SLIT2;CD74	13.5265	2.69411e-42
GOBP_DEVELOPMENTAL_GROWTH	BCL2L11;CDK4;CDKN1A;CDKN1B;YAP1;SEMA3C;AGR2;PDLIM5;AKAP13;ADM;CRABP2;CREB1;MAPK14;CSF1;ADRA1A;CTNNB1;CYP19A1;ARX;DPYSL2;DRD2;AGT;DUSP6;S1PR1;EDN1;EDNRA;MEGF8;ERCC1;ERCC2;AKT1;ERCC6;ESR1;EZH2;FGF1;FGF2;FGF9;FGFR2;FOXO3;PLCB1;NEDD4L;FN1;LPAR3;MTOR;GATA3;GATA6;MSTN;AMH;GH1;GHRH;GHRHR;FOXP1;GLI1;GLI3;GSK3B;ANXA1;HOXA11;IGF1;APOE;IGFBP1;RBPJ;IHH;IL7;INSR;AR;ITGB1;AREG;L1CAM;LEP;LEPR;LIMK1;MIR195;MIR20…	3.96697	3.25448e-42
GOBP_EXTERNAL_ENCAPSULATING_STRUCTURE_ORGANIZATION	POSTN;MMP24;COL1A1;CPB2;CCN2;CCDC80;CYP1B1;DPP4;AGT;ERCC2;FBLN1;ABI3BP;GREM1;ANXA2;HAS1;CCN1;IHH;IL6;ITGB1;ITGB3;LAMB1;LOX;LOXL1;SMAD3;MMP1;MMP2;MMP3;MMP7;MMP9;MMP12;MMP13;MMP14;NOTCH1;TNFRSF11B;PDGFRA;PLG;SULF2;RB1;RXFP1;SMOC2;SFRP2;FSCN1;SOX9;TGFB1;TGFB2;TGFBI;TGFBR1;TNF;TNFRSF1A;TNFRSF1B;VTN;WT1;NDNF;COL18A1;MIA;CRISPLD2;LOXL4;RUNX1;SERPINH1;WNT3A;CREB3L1	6.02127	5.05835e-42
GOBP_REGULATION_OF_LEUKOCYTE_DIFFERENTIATION	ADA;RASGRP1;CDK6;LILRB2;LILRB1;FCRL3;CCR1;CREB1;CSF1;IL34;CTLA4;CTNNB1;ERBB2;FANCD2;FBN1;FOXO3;FOS;IL27;MTOR;FSHB;GATA2;GATA3;FOXP1;GLI3;TBX21;ANXA1;HLA-B;HLA-DRB1;HLA-G;HMGB1;IAPP;ID2;IFNG;IHH;IL2;IL2RA;IL4;IL7;IL7R;IL10;IL12B;IL12RB1;IL15;IL17A;IL18;INHA;INHBA;LGALS1;LGALS3;LGALS9;LIF;LTF;LYN;MIR145;MIR21;MDK;KITLG;MMP14;MYB;MYC;TNFRSF11B;FOXP3;IL23A;PF4;TREM2;PRKCA;AXL;PTPRC;RB1;ACTB;BCL6;CCL1…	6.08531	5.17066e-42
GOBP_MORPHOGENESIS_OF_AN_EPITHELIUM	YAP1;FST;SEMA3C;PHB2;CTHRC1;ADM;CSF1;CSF1R;CTNNB1;DLX3;AGT;HBEGF;AGTR2;EDN1;EDNRA;EGF;MEGF8;EGFR;ESR1;FGF1;FGF2;FGFR2;DKK1;PLXND1;ASTN2;MTOR;GATA3;GREM1;GDNF;GJA1;FOXP1;INTU;GLI3;NR3C1;HGF;HIF1A;HOXA11;HOXA13;HOXB4;TNC;CCN1;RBPJ;IHH;CXCR2;IL10;ILK;CXCL10;AR;ITGA5;ITGB1;AREG;KDR;KRAS;HES5;RHOC;LIF;MIR21;TACSTD2;SMAD3;SMAD4;MDK;MET;MMP2;MMP12;MMP14;MYC;NGFR;NOTCH1;NOTCH4;PAK1;PAX2;PDGFA;PGR;PIK3CD;…	4.43732	1.01294e-41
GOBP_CELL_SUBSTRATE_ADHESION	BCL2L11;CDK6;CDKN2A;CIB1;AGR2;OLFM4;HPSE;CCR7;COL1A1;CRK;CSF1;CCN2;CTNNB1;CCDC80;EPHA3;FBLN1;FGA;FN1;ALOX15;ABI3BP;POLDIP2;GREM1;ANGPT1;ANGPT2;GSK3B;CCN1;ILK;ITGA2;ITGA5;ITGAM;ITGAV;ITGB1;ITGB3;ITGB8;KDR;L1CAM;LAMB1;MIR183;TACSTD2;MIR29C;SMAD3;MDK;MMP12;MMP14;MUC4;NOTCH1;SERPINE1;PIK3CB;PLAU;PLG;WNT4;AXL;PTEN;MIR503;RASA1;BCL2;BCL6;ROCK1;CCL21;CCL25;CX3CL1;SDC4;SFRP1;SRC;BRAF;TEK;THBS1;THY1;UTRN;…	5.47141	1.63341e-41
GOBP_CELL_ACTIVATION_INVOLVED_IN_IMMUNE_RESPONSE	ADA;RASGRP1;LILRB1;DOCK11;CX3CR1;ERCC1;F2RL1;FCGR3A;IL27;MTOR;GATA2;GATA3;FOXP1;MSH6;TBX21;ANXA1;HLA-DRB1;HMGB1;HSPD1;ICAM1;IFNA1;IFNA13;IFNG;IL2;IL4;IL6;IL10;IL12B;IL12RB1;IL13;IL18;ITGAM;LGALS1;LGALS3;LGALS9;LYN;MIR21;MDK;MLH1;MSH2;MYB;FOXP3;IL23A;ENPP3;PIK3CD;PIK3CG;TREM2;PSEN1;PTGER4;PTPRC;IL21;BCL6;CCL19;STAT3;STAT6;BTK;TGFB1;TLR4;TP53;CCR2;TYROBP;XBP1;IL18R1;IL33;CD19;CD86;CD40LG;CD74	6.27628	3.27077e-41
GOBP_CELL_JUNCTION_ORGANIZATION	LILRB2;PDLIM5;CFL1;LRRK2;CLDN4;CLDN3;CLDN7;MAPK14;CSF1R;CSK;CTNNB1;GPBAR1;CX3CR1;ACE;DRD2;AGT;EPHA3;EPHB2;ERBB2;F2R;F2RL1;DKK1;PLXND1;FN1;POLDIP2;GREM1;GDNF;GJA1;GJB2;TNC;APOE;IGF1R;IL1B;IL1RAP;IL10;IL17A;INSR;ITGA2;ITGA5;ITGAM;ITGB3;KDR;RHOC;L1CAM;MIR142;SMAD3;MECP2;MMP14;NTRK2;NTRK3;CLDN11;OXTR;TREM2;WNT4;SYBU;PRKCA;PSEN1;PTEN;PTPRD;NECTIN1;BCL2;ACTB;ROCK1;BDNF;CX3CL1;SDC4;SFRP1;SLC1A1;SNAI2;SN…	3.75208	3.5049e-41
GOBP_EPITHELIAL_CELL_DIFFERENTIATION	CDH3;CDK6;CDKN1B;YAP1;FST;CEBPA;AGR2;TXNIP;HPSE;CLDN3;CREB1;CTNNB1;CYP1A1;AKR1C1;AKR1C2;ARX;DLX3;DLX5;S1PR1;EDNRA;ERCC2;AKT1;ESR1;EZH2;F2RL1;FGF2;FGFR2;AKR1B1;PLCB1;HEY1;NR5A2;NR5A1;GATA2;GATA3;GATA6;GREM1;GDNF;INTU;GLI1;GSK3B;ANXA1;HDAC1;HDAC2;HIF1A;HOXA13;ICAM1;ID2;IFNG;RBPJ;IHH;IL1A;IL1B;IL13;AR;ITGA2;JUN;GSTK1;KCNQ1;KDR;KRAS;HES5;LGALS3;LIF;MIR200C;MIR21;MIR34A;SMAD3;SMAD4;MET;MMP9;MSI1;NOTCH…	3.71691	3.68264e-41
GOBP_REGULATION_OF_CELLULAR_COMPONENT_BIOGENESIS	BCL2L11;CDKN1B;YAP1;CXCL13;PDLIM5;PRRT2;LRRK2;CCR7;CLDN3;CLDN7;DOCK11;PARP1;CSF2;CSF3;CCN2;GPBAR1;ACE;DNMT1;AGT;S1PR1;EPHA3;EPHB2;ERCC1;ESR1;F2RL1;FKBP4;DKK1;NUP62;ALOX15;MTOR;LMOD1;POLDIP2;GBA;GREM1;MSTN;INTU;GSK3B;TMOD3;HCK;HMGB1;BIRC2;IAPP;ICAM1;IFNG;APOE;CCN1;IL1B;IL1RAP;IL17A;USP17L2;KDR;RHOC;RHOG;STMN1;LGALS3;LIMK1;MIR142;MIR17;MIR20A;MIR21;MIR214;TACSTD2;SMAD3;SMAD4;MAP2;MECP2;MET;MMP1;MMP…	3.19858	6.8639e-41
GOBP_CELLULAR_RESPONSE_TO_ORGANIC_CYCLIC_COMPOUND	BCL2L11;CDK4;CDKN1B;PAK4;YAP1;CARM1;CEBPA;CFTR;CHRM3;PHB2;LRRK2;COL1A1;CREB1;PARP1;CTNNB1;GPBAR1;CYP1A1;CYP1B1;ACE;DDX5;DNMT1;DNMT3A;DRD2;EDN1;EGFR;EGR1;AHR;AIF1;ESR1;ESR2;ESRRB;EZH2;FKBP4;FOXO3;PLCB1;SIRT1;GABPA;MSTN;GHRHR;GJB2;FOXP1;GPER1;NR3C1;GSK3B;GSTM2;ANXA1;HDAC1;HDAC2;APEX1;IFIT1;IGF1R;IL1B;AQP1;IL10;IL15;IL18;INHBA;AQP9;AR;ITGA2;KCNQ1;ARG1;LEP;MIR21;NR3C2;MMP2;MIR342;NFKB1;OPRM1;P2RX3;P2…	4.14136	7.70888e-41
GOBP_MYELOID_LEUKOCYTE_ACTIVATION	RASGRP1;NDRG1;CEBPA;CD226;LRRK2;CNR1;CSF1;CSF2;CX3CR1;AIF1;F2RL1;FCGR3A;FN1;GATA2;FOXP1;ANXA1;HMGB1;HSPD1;IFNG;IFNGR1;RBPJ;IL4;IL6;CXCL8;CXCR2;IL10;IL13;IL15;IL18;ITGAM;ITGB8;JUN;LGALS9;LYN;MIR142;MIR145;MIR181C;MIF;CD200;ATM;ENPP3;PIK3CD;PIK3CG;PLA2G2A;TREM2;PSEN1;PTPRC;CCL5;CX3CL1;BTK;THBS1;TLR2;TLR3;TLR4;TNF;CCR2;TYROBP;TRPV1;DCSTAMP;TSLP;HYAL2;IL33;CD74	7.34933	8.91618e-41
GOBP_POSITIVE_REGULATION_OF_DEFENSE_RESPONSE	KLRC4-KLRK1;RASGRP1;NOD1;CEBPA;CD226;LRRK2;CCR7;CNR1;ACE;AGT;AGTR1;ETS1;F2RL1;KLRK1;FPR2;CADM1;NCR3;PDCD4;HCK;HLA-G;HMGB1;IFNG;IL1B;IL2;IL6;IL12B;IL15;IL16;IL17A;IL18;IDO1;ITGA2;KIR2DL4;ARG1;LGALS1;LTA;LYN;SH2D1A;MIR126;MIR142;MIR21;MIR22;MBL2;MDK;MMP12;NFKBIA;NINJ1;SERPINE1;PAK1;IL23A;PIK3CG;PLA2G2A;TREM2;MED1;MAPK3;PTGER4;PTGS2;PVR;IL21;CCL1;CCL5;CX3CL1;SRC;BTK;TLR2;TLR3;TLR4;TNF;TNFRSF1A;C3;CC…	6.10792	9.7535e-41
GOBP_CATION_TRANSPORT	ABCB6;DNM1L;ABCC9;CDKN1B;LILRB2;MTCO2P12;LILRB1;SCN11A;PHB2;FCRL3;CLCN3;CCR1;CCR5;CCR7;CNR1;CRH;CRHR1;CSF2;ADRA1A;CCN2;CNIH3;CTNNB1;ADRA2B;CYB5A;DAPK1;ACE;DPP6;DRD2;AGT;EDN1;EDNRA;EGF;EPHB2;EPO;AKT1;F2;F2R;FGF2;FKBP4;NEDD4L;SLC7A8;GDNF;GPER1;REM1;GSTM2;SLC40A1;ANXA2;IFNG;FASLG;AQP1;IL13;IL16;CXCL10;ITGAV;ITGB1;ITGB3;KCNQ1;KCNQ2;ARG1;LGALS3;LHCGR;LTF;LYN;MIR200C;MIR21;MIR210;MIR34A;MAOB;CXCL9;MMP9…	2.90911	1.18829e-40
GOBP_REGULATION_OF_HEMOPOIESIS	ADA;RASGRP1;CDK6;LILRB2;CEBPA;CIB1;LILRB1;FCRL3;H4-16;CCR1;CREB1;MAPK14;CSF1;CSF3;IL34;CTLA4;CTNNB1;ERBB2;ETS1;FANCD2;FBN1;FOXO3;FOS;IL27;MTOR;FSHB;GABPA;GATA2;GATA3;FOXP1;GLI3;TBX21;ANXA1;HIF1A;HLA-B;HLA-DRB1;HLA-G;HMGB1;IAPP;ID2;IFNG;IHH;IL2;IL2RA;IL4;IL7;IL7R;IL10;IL12B;IL12RB1;IL15;IL17A;IL18;INHA;INHBA;LGALS1;LGALS3;LGALS9;LIF;LOX;ARNT;LTF;LYN;MIR145;MIR21;MDK;KITLG;MMP14;MYB;MYC;NFKBIA;TNFR…	5.00904	1.42834e-40
GOBP_ORGANONITROGEN_COMPOUND_CATABOLIC_PROCESS	ADA;CDKN1B;CEBPA;HPSE;SMPDL3A;LRRK2;COMT;CPB2;CRMP1;CTNNB1;CYP3A4;ACE;DIO2;SARDH;DPYSL2;EGF;EGFR;TET3;AKT1;FGF2;FOXO1;NEDD4L;SIRT1;MTOR;RNF19A;GBA;CCDC22;MYLIP;GSK3B;TBX21;ANXA2;HPRT1;BIRC2;IFI27;IFNG;APOE;IL1B;IL10;IDO1;USP17L2;ARG1;LIPC;MIR21;SMAD3;SMAD4;MAOA;MAOB;MDM2;MME;MMP2;MMP12;ATM;NFE2L2;NOS1;NOS2;NOS3;NOTCH1;NT5E;OGG1;PAPPA;HERC5;PLK1;TREM2;UGT1A1;PPT1;VPS11;PSEN1;PSMD2;PSMD9;PSMD10;PTE…	2.76671	1.77813e-40
GOBP_SUPRAMOLECULAR_FIBER_ORGANIZATION	CDKN1B;MYL9;CIB1;CFL1;AKAP13;CCR7;COL1A1;CSF3;CCN2;CYP1B1;S1PR1;EDN1;AIF1;F2RL1;FKBP4;ALOX15;MTOR;LMOD1;GREM1;ANKRD1;ANG;TMOD3;ANXA2;HCK;IAPP;APOE;ITGB1;RHOC;RHOG;STMN1;LIMK1;LOX;LOXL1;MIR20A;MIR21;MIR214;TACSTD2;MIR31;SMAD3;SMAD4;MAP2;MDM2;MECP2;MET;NEFM;PAK1;PDGFRA;PDGFRB;PIK3CA;TREM2;WNT4;KRT20;RHOF;PSEN1;B2M;PTGER4;BAX;RASA1;RB1;BCL2;RGS4;ROCK1;CCL11;CCL21;CX3CL1;SDC4;CXCL12;SFRP1;SFRP2;FSCN1…	3.4534	3.39206e-40
GOBP_POSITIVE_REGULATION_OF_TRANSFERASE_ACTIVITY	RASGRP1;CDKN1A;CDKN1B;CIB1;AKAP13;PHB2;CKS1B;LRRK2;CCR7;CSF1;CSF1R;CSK;IL34;ADRA1A;CTNNB1;ADRA2B;ACE;DRD2;AGT;HBEGF;AGTR1;EDN1;EGF;EGFR;EGR1;EPHA3;EPHB2;EPHB4;EPO;ERBB2;AKT1;ERCC6;EZH2;F2;FGF1;FGF2;FGFR2;DKK1;FLT1;SIRT1;MTOR;GREM1;GH1;ANG;ANGPT1;HLA-DRB1;APOA2;IFNG;IGF1;APOE;IGF1R;CCN1;IL1B;IL2;IL4;IL12B;IL18;INSR;ITGB3;AREG;KDR;LEP;LTF;LYN;MIR143;MIR21;MAS1;MET;KITLG;MIF;MNAT1;CD200;MST1R;MYC;NT…	4.04411	7.84112e-40
GOBP_NEGATIVE_REGULATION_OF_CELL_DIFFERENTIATION	SRA1;TOB1;CDK6;YAP1;FST;SEMA3C;CIB1;CETP;LILRB1;H4-16;CRP;CTLA4;CTNNB1;DNMT1;EGFR;EPHB2;ERBB2;ESRRB;EZH2;F2;FBLN1;FBN1;FGF9;ZHX2;KIFAP3;DKK1;FOXO1;FOXO3;DICER1;SIRT1;HEY1;GABPA;GATA2;GATA3;GREM1;MSTN;FOXP1;PDCD4;GLI3;GPER1;GSK3B;TBX21;ANXA1;HDAC1;HLA-G;HMGB1;FOXA2;IAPP;ID2;IFNG;IGF1;RBPJ;IHH;IL1A;IL1B;IL2;IL4;IL6;IL13;IL18;INHA;INHBA;CXCL10;ITGAV;ITGB1;ITGB3;AREG;KRAS;HES5;LTF;LYN;MIR100;MIR17;MI…	3.65991	8.2804e-40
GOBP_REGULATION_OF_HORMONE_LEVELS	CFTR;UCN3;CNR1;ADM;CRABP2;CREB1;CRH;CRHR1;CYP1A1;CYP1A2;CYP1B1;CYP3A4;CYP11A1;CYP17A1;CYP19A1;CYP26A1;ACE;AKR1C1;AKR1C2;DIO2;DPP4;DRD2;AGT;AGTR1;EDN1;EGR1;ESR1;FGA;FOXO1;AKR1B1;SLC7A8;FSHB;NR5A1;GATA3;GHRH;GHRHR;GJA1;GNRHR;GPER1;NR3C1;ANXA1;HIF1A;HLA-DRB1;FOXA2;HSD3B1;HSD3B2;HSD17B1;HSD17B3;HSD17B2;IFNG;IGF1R;IL1B;IL1RN;IL6;AQP1;IL11;INHA;INHBA;KCNQ1;KISS1;LEP;LHB;LHCGR;LIF;LIPE;ARNT;LYN;SMAD2;SM…	4.31584	1.387e-39
GOBP_NEGATIVE_REGULATION_OF_CATALYTIC_ACTIVITY	KLRC4-KLRK1;CDKN1A;CDKN1B;CDKN2A;ADAR;CEBPA;CIB1;TXNIP;LRRK2;CNR1;CSK;DRD2;AGT;DUSP1;AHSG;EPHB2;AKT1;KLRK1;SIRT1;NUP62;SH3BP4;PTPN22;GBA;MSTN;PDCD4;GSK3B;GSTP1;ANXA1;ANXA2;HGF;NR4A1;FOXA2;HP;BIRC2;BIRC3;BIRC5;APOA2;IFIT1;IFNG;APOE;IL1B;IL7;IL9;AQP1;IL13;USP17L2;KNG1;LEPR;LGALS3;LIMK1;LPA;LTF;LYN;MIRLET7B;MIR132;MIR17;MIR195;MIR20A;MIR21;MIR210;MIR27B;MIR29C;MIR34A;MMP9;MNAT1;NFKB1;NGF;NOS1;NOS3;N…	3.45684	2.74481e-39
GOBP_IMMUNE_RESPONSE_REGULATING_CELL_SURFACE_RECEPTOR_SIGNALING_PATHWAY	ADA;KLRC4-KLRK1;LILRB2;KHDRBS1;CD226;LILRB1;FCRL3;CCR7;CD200R1;CSK;CTLA4;FCGR3A;KLRK1;FPR1;FPR2;NCR3;PTPN22;GATA3;FOXP1;TNFRSF21;HCK;HLA-DPB1;HLA-DQB1;HLA-DRB1;HLA-G;KIR2DL1;KLRC1;LGALS3;LIMK1;LYN;SH2D1A;MIR34A;MBL2;PAK1;FOXP3;PIK3CA;PIK3CD;PRKCB;MAPK1;MAPK8;MAP2K7;PSEN1;PTPRC;BAX;BCL2;RELA;WNK1;SRC;BRAF;BTK;THY1;TYROBP;VAV1;EZR;BAG6;CARD11;SKAP1;BCL10;CD19;MS4A1;CD47;CD79A	5.6155	3.76558e-39
GOBP_ANATOMICAL_STRUCTURE_HOMEOSTASIS	CDH3;YAP1;CLCN3;CLDN3;CSF1;CSF1R;CSK;CCN2;CTNNB1;S1PR1;ERCC6;ESRRB;ALB;F2R;FSHB;GATA2;MSTN;GJA1;ANGPT1;HIF1A;ACACA;HOXA13;IAPP;IHH;IL6;IL7;IL17A;ITGB1;ITGB3;KDR;KRAS;LOX;LTF;MUC2;MUC4;NOS3;NOTCH1;TNFRSF11B;PLG;PRKCA;PSEN1;B2M;PTGS2;BAX;RB1;BCL2;ACTB;CX3CL1;SLC1A1;SLC2A1;SOD1;SOX9;SPP1;SRC;TFF3;TLR4;CLDN5;VEGFA;CA2;CALCA;DCSTAMP;PROM1;CLDN1	5.6155	3.76558e-39
GOBP_AXON_DEVELOPMENT	UST;PLXNC1;SEMA3C;CNR1;CRABP2;CREB1;CRMP1;CSF1R;ARX;DLX5;DPYSL2;DRD2;EDN1;EDNRA;MEGF8;EPHA3;EPHB2;EPHB4;ERBB2;FGFR2;PLXND1;FN1;LPAR3;GATA3;GDNF;TNFRSF21;GLI3;GSK3B;TNC;APOE;IGF1R;ITGB1;JUN;L1CAM;RHOG;LAMC2;STMN1;LIMK1;SMAD4;MAP2;MMP2;NCAM1;NGF;NGFR;NOTCH1;NTRK2;PAK1;PAX2;ROBO4;MAP2K1;PSEN1;PTEN;SEMA6A;PTN;NECTIN1;BCL2;ACTB;BDNF;S100A6;S100B;CXCL12;BMP7;BMPR1B;SLIT3;SPP1;BRAF;BSG;TSPO;THY1;UCHL1;V…	4.42175	5.36859e-39
GOBP_REGULATION_OF_CHEMOTAXIS	KLRC4-KLRK1;DNM1L;SEMA3C;CXCL13;CCR1;CCR7;CSF1;CSF1R;IL34;CX3CR1;CYP19A1;DPP4;DUSP1;S1PR1;EDN1;MEGF8;AIF1;F2RL1;F3;FGF1;FGF2;KLRK1;FPR2;DAPK2;GREM1;MSTN;ANGPT2;HMGB1;IL4;IL6;CXCL8;CXCR2;IL16;CXCL10;ITGA2;KDR;LGALS9;LYN;MIR34A;SMAD3;MDK;MET;MIF;NOTCH1;NTF3;NTRK3;SERPINE1;PDGFRA;IL23A;PDGFRB;PGF;TREM2;MAPK1;MAPK3;SEMA6A;PTN;RARRES2;CCL1;CCL2;CCL5;CCL19;CCL21;CXCL12;SMOC2;WNK1;ADAM17;TGFB1;THBS1;C5;…	7.29639	5.43705e-39
GOBP_PROTEIN_CONTAINING_COMPLEX_ORGANIZATION	PDCD6;BCL2L11;MED16;DNM1L;CDKN1B;ADAR;YAP1;CIB1;CXCL13;CETP;CFL1;PPARGC1A;PRRT2;LRRK2;H4-16;CCR7;CLDN7;PARP1;CSF2;CSF3;CTH;AGT;HBEGF;AGTR1;EGF;EGFR;AIF1;ELAVL1;ESR1;F2RL1;FGA;FKBP4;KIFAP3;DKK1;FN1;DICER1;ITGB3BP;ALOX15;MTOR;LMOD1;GBA;GREM1;ANG;ANGPT1;GPX4;MED4;PDIA3;GSK3B;TMOD3;H2AX;HCK;ACACA;HLA-DPB1;HLA-DQB1;HLA-DRB1;HLA-G;HMGB1;HMGA1;HPRT1;BIRC2;HSPA4;HSPD1;APOA2;IAPP;IFNG;APOE;IGF1R;FAS;IL1RA…	2.4519	5.47945e-39
GOBP_NEGATIVE_REGULATION_OF_CELL_ACTIVATION	LILRB2;LILRB1;CNR1;CTLA4;ERBB2;F2;PTPN22;TNFRSF21;GLI3;GPER1;CD274;TBX21;ANXA1;HLA-DRB1;HLA-G;HMGB1;ID2;APOE;IHH;IL2;IL2RA;IL4;IL10;IDO1;INHA;INHBA;ARG1;LGALS3;LGALS9;LYN;MIR181C;MIR21;MDK;CD200;ATM;NOS3;FOXP3;PDGFA;PDGFRA;ENPP3;TREM2;AXL;PTEN;PTPRC;BCL6;CX3CL1;SDC4;SFRP1;BMP4;BTK;CCR2;TYROBP;CASP3;RUNX1;RUNX3;CD86;CD74	7.52114	6.00501e-39
GOBP_T_CELL_PROLIFERATION	RASGRP1;LILRB2;LILRB1;CTLA4;CTNNB1;CD55;AIF1;EPO;ERBB2;CADM1;IL27;PTPN22;TNFRSF21;CD274;ANXA1;HLA-DPB1;HLA-DRB1;HLA-G;HMGB1;IGF1;IHH;IL1A;IL1B;IL2;IL2RA;IL4;IL6;IL10;IL12B;IL12RB1;IL15;IL18;IDO1;ARG1;LEP;LGALS3;LGALS9;MIR181C;MIR21;KITLG;FOXP3;IL23A;PIK3CG;WNT4;PTEN;PTPRC;BAX;IL21;BCL6;CCL5;CCL19;SDC4;BMP4;TNFRSF1B;TP53;CCR2;TYK2;VCAM1;ZP3;CASP3;CARD11;CD86;CD40LG	7.77159	6.28219e-39
GOBP_TUMOR_NECROSIS_FACTOR_SUPERFAMILY_CYTOKINE_PRODUCTION	RASGRP1;NOD1;LILRB1;LRRK2;SIRPA;CX3CR1;EPHB2;FCGR3A;DICER1;PTPN22;FOXP1;IL37;ANGPT1;CD274;GSTP1;HDAC2;HMGB1;IFNG;IFNGR1;IGF1;IL1A;IL4;IL6;IL10;IL12B;IL17A;LEP;LGALS9;LTF;MIR132;MIR195;MIR204;MIR27B;MIF;FOXP3;IL23A;PF4;ERRFI1;TREM2;AXL;PSEN1;MIR488;PTPRC;CCL19;CX3CL1;STAT3;BTK;THBS1;TSPO;TLR2;TLR3;TLR4;TWIST1;CCR2;TYROBP;ZFP36;BCL10;IL33;CD14;ADIPOQ;CD86;CD36;CD47	8.5034	6.77237e-39
GOBP_ERK1_AND_ERK2_CASCADE	RASGRP1;NOD1;CIB1;PHB2;CCR1;CCR7;SIRPA;CSF1R;CSK;ADRA1A;CCN2;GPBAR1;DRD2;AGT;DUSP6;EDN1;EGF;EGFR;EPHB2;EPO;ERBB2;F2R;F2RL1;FBLN1;FGA;FGF1;FGF2;FGFR2;FN1;FPR2;ALOX15;FSHR;PTPN22;ANGPT1;GPER1;GSTP1;HLA-DRB1;HMGB1;ICAM1;IGF1;APOE;CCN1;IL1A;IL1B;INHBA;ITGAV;ITGB3;JUN;KDR;LGALS9;LIF;LYN;MIRLET7B;MIR126;MIR145;MIR200C;MIR21;MIR27B;SMAD4;MIF;MYC;NOTCH1;NTRK2;NTRK3;OPRM1;OXTR;P2RY6;PDGFA;PDGFRA;PDGFRB;PL…	5.4422	8.36871e-39
GOBP_ION_HOMEOSTASIS	ABCB6;CFTR;CLCN3;LRRK2;CCR1;CCR5;CCR7;ADM;ACE;DRD2;AGT;AGTR1;EDN1;EDNRA;F2;F2R;FGF2;SLC7A8;GPER1;CCDC22;GSTM2;SLC40A1;HIF1A;IFNG;APOE;IL1A;FASLG;IL13;CXCL10;ITGB3;KCNQ1;KDR;LHCGR;LTF;LYN;MIR210;SMAD4;CXCL9;MYC;NOS1;NT5E;P2RY6;ENPP1;ENPP3;PIK3CB;RMDN3;PPT1;PRKCB;MAPK1;MAPK3;ANKH;PSEN1;B2M;PTPRC;BAX;BCL2;CCL1;CCL5;CCL11;CCL14;CCL19;CCL21;CX3CL1;CXCL12;SLC1A1;WNK1;SOD1;SOD2;STC1;TACR1;THY1;TPT1;TRPC…	3.85009	1.177e-38
GOBP_POSITIVE_REGULATION_OF_LEUKOCYTE_PROLIFERATION	ADA;CDKN1A;LILRB2;FCRL3;CSF1;CSF1R;CSF2;IL34;CD55;AIF1;EPHB2;EPO;FCGR3A;PTPN22;CD274;ANXA1;HLA-DPB1;HMGB1;IGF1;IL1A;IL1B;IL2;IL2RA;IL4;IL6;IL7;IL12B;IL12RB1;IL13;IL15;IL18;LEP;LGALS9;LYN;MIR21;KITLG;MIF;FOXP3;IL23A;MAPK1;MAPK3;PRLR;PTPRC;IL21;BCL2;BCL2L1;BCL6;CCL5;CCL19;TACR1;BTK;TLR4;CCR2;TYK2;VCAM1;ZP3;CARD11;IRS2;WNT3A;CD86;CD40LG;CD74	9.49991	1.45186e-38
GOBP_CELL_MORPHOGENESIS_INVOLVED_IN_DIFFERENTIATION	UST;PLXNC1;SEMA3C;CIB1;OLFM4;PDLIM5;CFL1;LRRK2;CLDN3;CRABP2;CREB1;CRK;CRMP1;CSF1R;CTNNB1;ARX;DLX5;DPYSL2;DRD2;EDN1;EDNRA;MEGF8;EPHA3;EPHB2;EPHB4;ERBB2;FBLN1;FGA;FGFR2;DKK1;PLXND1;NEDD4L;FN1;LPAR3;GATA3;GDNF;GLI3;GSK3B;HOXA13;HPRT1;APOE;IGF1R;IHH;ILK;AR;ITGAV;ITGB1;ITGB3;L1CAM;RHOG;LAMB1;LAMC2;STMN1;LIMK1;TACSTD2;SMAD4;MAP2;MDK;MET;NCAM1;NGF;NGFR;NOTCH1;NOTCH4;NTRK2;PAK1;PAX2;ROBO4;AXL;MAP2K1;PSEN…	3.57773	1.48432e-38
GOBP_REGULATION_OF_BODY_FLUID_LEVELS	ADA;MYL9;AGR2;MTCO2P12;CFTR;HPSE;CHRM3;ADM;CPB2;CLDN4;CREB1;MAPK14;ADRA2B;DRD2;EDN1;EPHB2;F2;F2R;F2RL1;F3;FBLN1;FGA;AKR1B1;FN1;GBA;GHRHR;ANXA2;HIF1A;FOXA2;HSD11B2;APOE;IL6;AQP1;AQP2;IL18;ILK;AQP5;ITGA2;ITGB3;KNG1;STMN1;LYN;MET;NFE2L2;NME1;NOS3;OXTR;SERPINE1;SERPINB2;PDGFA;PDGFRA;PF4;PF4V1;SERPINA1;PIK3CA;PIK3CB;PIK3CG;PLAU;PLG;MED1;PRKCA;AXL;PRL;PRLR;CCND1;ACTB;WNK1;SRC;TACR1;THBS1;TLR4;SERPING1;…	4.99903	1.87486e-38
GOBP_CELLULAR_LIPID_METABOLIC_PROCESS	CETP;PPARGC1A;SMPDL3A;PHB2;CNR1;SGPP2;CRABP2;MAPK14;CSF1R;CYP1A1;CYP1A2;CYP1B1;CYP2B6;CYP2C19;CYP3A4;CYP26A1;AKR1C1;AKR1C2;DECR1;DIO2;EDN1;AKT1;FGF2;AKR1B1;PLCB1;FMO2;SIRT1;ALOX15;GATA6;GBA;HPGDS;ANG;GPX4;GSTM1;GSTM2;GSTP1;ANXA1;ACACA;HPGD;APOA2;APOE;CCN1;IL1B;IMPA2;ITGB8;LEP;LIPC;LIPE;CYP4F3;MIR132;MIR204;MIR30C1;MIR33A;MECP2;MIF;ATM;PDGFA;PDGFRB;PIK3CA;PIK3CB;PIK3CD;PIK3CG;PLA2G2A;PON1;PPARA;UG…	3.06415	2.15453e-38
GOBP_RESPONSE_TO_EXTRACELLULAR_STIMULUS	CDKN1A;POSTN;PPARGC1A;UCN3;LRRK2;CNR1;COL1A1;COMT;ADM;MAPK14;CYP1A1;CYP1B1;CYP26A1;ACE;DNMT3A;AIF1;EPO;ERCC1;AKT1;ERCC6;ALB;FOXO1;FOXO3;SIRT1;FOS;MTOR;GBA;GH1;GHRH;FOXA2;HSD11B2;APOE;IGF1R;FAS;IL1A;AQP2;IL15;CXCL10;ITGA2;ARG1;LEP;LTA;LYN;MPO;NFE2L2;OGG1;TNFRSF11B;OPRM1;PAX2;WNT4;PON1;KRT20;PPARA;UGT1A1;PPARG;MED1;AXL;MAPK1;MAPK3;MAPK8;PRL;PTGS2;PTPRC;BAX;CCND1;BCL2;RXRA;SFRP1;SFRP2;SLC2A1;SLC6A4;…	4.31649	2.48206e-38
GOBP_METAL_ION_HOMEOSTASIS	ABCB6;CCR1;CCR5;CCR7;ADM;ACE;DRD2;AGT;AGTR1;EDN1;EDNRA;F2;F2R;FGF2;SLC7A8;GPER1;CCDC22;GSTM2;SLC40A1;HIF1A;IFNG;APOE;IL1A;FASLG;IL13;CXCL10;ITGB3;KCNQ1;KDR;LHCGR;LTF;LYN;MIR210;SMAD4;CXCL9;MYC;NOS1;NT5E;P2RY6;PIK3CB;RMDN3;PRKCB;ANKH;PSEN1;B2M;PTPRC;BAX;BCL2;CCL1;CCL5;CCL11;CCL14;CCL19;CCL21;CX3CL1;CXCL12;SLC1A1;WNK1;SOD1;SOD2;STC1;TACR1;THY1;TPT1;TRPC6;CCR2;VDR;TRPV1;CALCA;CASR;STC2;HYAL2;CD19	4.23225	2.55827e-38
GOBP_CELLULAR_HOMEOSTASIS	ABCB6;CFTR;PPARGC1A;CLCN3;LRRK2;CCR1;CCR5;CCR7;CPB2;MUC17;ACE;DRD2;AGT;EDN1;EDNRA;F2;F2R;FGF2;FOXO1;FOXO3;SIRT1;MSTN;GHRHR;GPER1;CCDC22;GSTM2;SLC40A1;HIF1A;HK1;HLA-DRB1;FOXA2;APEX1;ICAM1;IFNG;APOE;IGF1R;IL1A;FASLG;IL6;AQP1;IL13;CXCL10;ITGB3;KCNQ1;LHCGR;LOX;LYN;MIR210;SMAD4;CXCL9;MYC;NFE2L2;NGFR;NOS1;NOS2;NOS3;P2RY6;PAX2;ENPP1;SERPINF1;PIK3CA;PIK3CB;PLG;TREM2;RMDN3;PPT1;PRKCB;MAPK1;MAPK3;PSEN1;PTP…	3.44278	3.88853e-38
GOBP_ORGANIC_ACID_METABOLIC_PROCESS	PPARGC1A;CYP2R1;CNR1;CRABP2;MAPK14;CTH;CYP1A1;CYP1A2;CYP1B1;CYP2B6;CYP2C19;CYP3A4;CYP26A1;AKR1C1;AKR1C2;DECR1;SARDH;EDN1;ENO1;AKT1;AKR1B1;FMO2;SIRT1;ALOX15;MTOR;NR5A2;GATM;HPGDS;GPX4;GSTM1;GSTM2;GSTP1;ANXA1;HIF1A;HK1;ACACA;HPGD;IFNG;IGF1;IL1B;IDO1;INSR;ARG1;LEP;LIPC;ARNT;CYP4F3;MIR132;MIR204;MIR21;MIR210;MIR30C1;MIR33A;MECP2;MIF;MPO;NOS1;NOS2;NOS3;ENPP1;PON1;UGT2B28;PPARA;UGT1A1;PPARG;QRSL1;ANKH;…	3.11113	6.73676e-38
GOBP_CELLULAR_COMPONENT_MORPHOGENESIS	DNM1L;UST;PLXNC1;MYL9;SEMA3C;PDLIM5;CFL1;AKAP13;LRRK2;CRABP2;CREB1;CRMP1;CSF1R;CTNNB1;ARX;DLX5;DPYSL2;DRD2;EDN1;EDNRA;MEGF8;EPHA3;EPHB2;EPHB4;ERBB2;ERCC2;FGFR2;PLXND1;NEDD4L;FN1;DICER1;LPAR3;LMOD1;POLDIP2;GATA3;GDNF;ANKRD1;GLI3;GSK3B;TMOD3;HPRT1;APOE;IGF1R;IHH;ITGB1;L1CAM;RHOG;LAMC2;STMN1;LIMK1;SMAD4;MAP2;MDK;NCAM1;NGF;NGFR;NOTCH1;NTF3;NTF4;NTRK2;PAK1;PAX2;NRN1;PDGFRA;PDGFRB;ROBO4;MAP2K1;PSEN1;PT…	3.43344	1.25431e-37
GOBP_NEGATIVE_REGULATION_OF_TRANSCRIPTION_BY_RNA_POLYMERASE_II	CDK6;YAP1;FST;CEBPA;TXNIP;KHDRBS1;CTCF;OSR2;PARP1;CTNNB1;DDX5;ARX;DNMT1;DNMT3A;DNMT3B;EDN1;EGR1;ENO1;EPO;NR2F6;ESR1;ESR2;EZH2;FGF9;FGFR2;ZHX2;DKK1;FOXM1;FOXO1;FOXO3;DICER1;SIRT1;HEY1;GABPA;CHD5;GATA2;GATA3;GATA6;FOXD3;FOXP1;GLI3;NR3C1;TBX21;HDAC1;HDAC2;HMGB1;HOXB4;ID2;IFI27;IFNG;RBPJ;FASLG;IL4;AR;JUN;HES5;LEP;SMAD3;SMAD4;MDM2;MECP2;MMP12;MYB;MYC;NFKB1;NOTCH1;NOTCH4;YBX1;FOXP3;PCNA;PLK1;DLL4;POU5F…	3.10128	2.09603e-37
GOBP_METAL_ION_TRANSPORT	ABCB6;DNM1L;ABCC9;CDKN1B;LILRB2;LILRB1;SCN11A;FCRL3;CCR1;CCR5;CCR7;CRHR1;ADRA1A;CCN2;CTNNB1;ACE;DPP6;DRD2;AGT;EDN1;EDNRA;EGF;EPO;AKT1;F2;F2R;FGF2;FKBP4;NEDD4L;GPER1;REM1;GSTM2;SLC40A1;ANXA2;IFNG;FASLG;AQP1;IL13;IL16;CXCL10;ITGAV;ITGB1;ITGB3;KCNQ1;KCNQ2;LGALS3;LHCGR;LTF;LYN;MIR200C;MIR21;MIR210;MIR34A;CXCL9;NOS1;NOS3;OPRM1;P2RX3;P2RX5;P2RY6;PDGFRB;PIK3CG;TREM2;PRKCB;PSEN1;B2M;PTGS2;PTPRC;BAX;NECTI…	3.16578	2.75059e-37
GOBP_REGULATION_OF_PRODUCTION_OF_MOLECULAR_MEDIATOR_OF_IMMUNE_RESPONSE	NOD1;CD226;LILRB1;PHB2;FCRL3;CD55;EPHB2;F2RL1;SIRT1;PTPN22;GATA3;ANGPT1;TBX21;HK1;HLA-G;APOA2;IL1B;IL1R1;IL2;IL4;IL6;IL10;IL13;IL17A;IL18;KIR2DL4;ARG1;MIF;MLH1;MSH2;FOXP3;AXL;B2M;PTPRC;IL21;BCL6;STAT6;BTK;TGFB1;TGFB2;TGFB3;TLR3;TLR4;TNF;TNFRSF1B;TWIST1;CCR2;XBP1;IL18R1;BCL10;IL33;CD86;CD36;CD40LG;CD74	8.21869	2.93487e-37
GOBP_REGULATION_OF_PEPTIDASE_ACTIVITY	PDCD6;BCL2L11;NOD1;CLDN4;CLDN3;CCN2;DAPK1;AGT;AHSG;AKT1;F2R;F3;FBLN1;FN1;SIRT1;GPER1;ANXA2;HDAC1;HGF;HMGB1;NR4A1;BIRC2;BIRC3;BIRC5;HSPD1;CCN1;FAS;FASLG;IL9;AQP1;KNG1;LGALS9;LPA;LTF;LYN;MIRLET7B;MIR17;MIR195;MIR205;MIR21;MIR27B;MIR29C;SMAD3;MMP9;MYC;NGF;NGFR;SERPINE1;SERPINB2;PAX2;SERPINF1;SERPINA1;PPARG;PTGS2;BAX;RAF1;RARRES1;ROCK1;SFRP2;SLC1A1;SLPI;SOX2;SRC;STAT3;THBS1;TIMP1;TIMP2;TIMP3;TIMP4;SE…	4.46067	3.04391e-37
GOBP_MUSCLE_STRUCTURE_DEVELOPMENT	SRA1;MYL9;PDLIM5;AKAP13;ADM;CREB1;MAPK14;ADRA1A;CTH;CTNNB1;DDX5;DNMT1;AGT;HBEGF;S1PR1;EDN1;EDNRA;EGR1;AKT1;EZH2;FGF9;FGFR2;DKK1;PLCB1;SIRT1;HEY1;FOS;MTOR;LMOD1;GATA6;GREM1;MSTN;ANKRD1;FOXP1;PDCD4;GPER1;TMOD3;HDAC1;ERVW-1;NR4A1;ID2;IGF1;IGFBP3;RBPJ;IL4;IL18;CXCL10;ITGB1;KRAS;LAMB1;LGALS1;LIF;LOX;MIR100;MIR143;MIR145;MIR195;MIR200B;MIR204;MIR21;MIR22;MIR34A;SMAD3;SMAD4;MDM2;MECP2;CXCL9;MMP14;NINJ1;…	3.59045	4.21912e-37
GOBP_REPRODUCTION	ADA;BCL2L11;CDKN1B;FST;CIB1;KHDRBS1;CFTR;PHB2;LRRK2;CNR1;ZFP42;ADM;CLDN4;CRH;CRHR1;PARP1;CSF1;PDIK1L;CTNNB1;ADRA2B;CYP1A1;CYP1B1;CYP17A1;CYP19A1;ACE;DNMT3A;AGRP;AGT;DUSP1;EDN1;EDNRA;EGR1;EPO;EPOR;ERCC1;AKT1;ESR1;FANCD2;FBLN1;FGF9;FGFR2;FKBP4;FOXO3;PLCB1;SIRT1;FOS;CADM1;MTOR;FSHB;FSHR;NR5A1;GALNT3;NECTIN3;GATA3;GATA6;MSTN;AMH;AMHR2;GHRHR;GJA1;GJB2;HPGDS;GLI1;GLI3;GNRH1;ANG;ANGPT2;GPX4;NR3C1;MSH6;D…	2.57811	5.39198e-37
GOBP_CELL_PART_MORPHOGENESIS	DNM1L;UST;PLXNC1;SEMA3C;PDLIM5;CFL1;LRRK2;CRABP2;CREB1;CRMP1;CSF1R;CTNNB1;ARX;DLX5;DPYSL2;DRD2;EDN1;EDNRA;MEGF8;EPHA3;EPHB2;EPHB4;ERBB2;FGFR2;PLXND1;NEDD4L;FN1;DICER1;LPAR3;POLDIP2;GATA3;GDNF;GLI3;GSK3B;HPRT1;APOE;IGF1R;ITGB1;L1CAM;RHOG;LAMC2;STMN1;LIMK1;SMAD4;MAP2;MDK;NCAM1;NGF;NGFR;NOTCH1;NTF3;NTF4;NTRK2;PAK1;PAX2;NRN1;ROBO4;MAP2K1;PSEN1;PTEN;SEMA6A;PTN;PTPRD;BAX;NECTIN1;BCL2;BCL2L1;ACTB;ROCK1;…	3.63765	7.46634e-37
GOBP_RESPONSE_TO_PEPTIDE_HORMONE	CDK4;CDKN1B;COL1A1;ADM;CREB1;CRHR1;CRHR2;CRK;PARP1;MAPK14;CSK;CCN2;CYP1B1;CYP11A1;AGRP;AGT;AGTR1;AGTR2;EDN1;EDNRA;EGR1;AHSG;AKT1;FBN1;FOXO1;PLCB1;SIRT1;FOS;MTOR;NR5A1;MSTN;GH1;GHRHR;GJB2;GNRHR;GPER1;GSK3B;ANXA1;NR4A1;APEX1;HSD11B2;IGF1R;IGFBP1;IL1B;IL10;INHBA;INSR;ITGB3;JAK1;AREG;KCNQ1;ARG1;LEP;LHCGR;LYN;MIR143;MIR145;MIR195;MAS1;NFE2L2;NFKB1;OXTR;ENPP1;PIK3CA;ERRFI1;PPARA;PPARG;PRKCB;RETN;PTGS2;…	4.63625	9.80971e-37
GOBP_MYELOID_CELL_DIFFERENTIATION	CDK6;ADAR;CEBPA;CIB1;LILRB1;H4-16;CCR1;CCR7;CREB1;PARP1;MAPK14;CSF1;CSF1R;CSF2;CSF3;IL34;CTNNB1;EPO;ERCC2;ETS1;F2RL1;FBN1;NCOA6;FOXO3;SIRT1;FOS;MTOR;FSHB;GABPA;GATA2;GATA3;GBA;FOXP1;TMOD3;ANXA2;HIF1A;HLA-DRB1;IAPP;ID2;IFNG;RBPJ;IL4;IL11;IL12B;IL15;IL17A;INHA;INHBA;ITGB8;JUN;KCNQ1;LBR;LGALS9;LIF;LOX;ARNT;LTF;LYN;MIR145;KITLG;MMP9;MYB;MYC;NFKBIA;TNFRSF11B;IL23A;KLF13;PF4;PIK3CD;TREM2;PPARG;MED1;H4C…	4.7492	1.00055e-36
GOBP_G_PROTEIN_COUPLED_RECEPTOR_SIGNALING_PATHWAY	ADA;CXCR6;CCR9;AKAP13;CHRM3;UCN3;CCR1;CCR5;CCR7;CCR8;LTB4R;CNR1;ADM;CRHR1;CRHR2;ADRA1A;ADRA2B;GPBAR1;CX3CR1;AKR1C2;DEFB4A;AGRP;DRD2;AGT;AGTR1;AGTR2;S1PR1;EDN1;EDNRA;AKT1;ESR1;F2;F2R;F2RL1;OR9Q1;PLCB1;LPAR3;FPR1;FPR2;FSHB;FSHR;GHRH;GHRHR;GNRHR;CXCR3;GPER1;GPR42;CXCL1;ANXA1;HPGD;IAPP;APOE;IL2;CXCL8;CXCR1;CXCR2;CXCL10;INSR;ITGB3;AREG;KCNQ1;KISS1;STMN1;LHB;LHCGR;MIR143;MIR145;MAS1;MET;CXCL9;OPRM1;OXT…	2.71987	2.23058e-36
GOBP_SMALL_MOLECULE_BIOSYNTHETIC_PROCESS	ADA;CFTR;PPARGC1A;CYP2R1;ADM;CRABP2;CTH;CYP1A1;CYP1A2;CYP3A4;CYP19A1;EDN1;EGR1;FGF1;FGF2;FOXO1;AKR1B1;SIRT1;ALOX15;FSHB;GATM;GBA;HPGDS;GPER1;GPX4;NR3C1;GSTM1;GSTM2;GSTP1;ANXA1;ACACA;HPRT1;HSD17B1;HSD17B3;IFNG;APOE;IL1B;IMPA2;IDO1;LBR;LEP;LEPR;LHB;LHCGR;LIPC;MIR132;MIR204;MIR30C1;MIR33A;MAS1;MIF;MPO;MST1;NFKB1;NT5E;P2RY6;HSD17B7;WNT4;PPARA;PTGS2;RBP1;SRR;SNAI2;SNAI1;SOD1;SRD5A2;BRCA1;STAR;TNF;XBP1…	3.87824	2.70791e-36
GOBP_NEUTROPHIL_CHEMOTAXIS	DNM1L;CXCL13;CCR7;DPP4;EDN1;DAPK2;CXCL1;IL1B;CXCL8;CXCR1;CXCR2;CXCL10;LGALS3;MDK;CXCL9;IL23A;PF4;PF4V1;PIK3CD;PIK3CG;CCL1;CCL2;CCL5;CCL11;CCL14;CCL16;CCL17;CCL19;CCL21;CCL22;CCL25;CXCL5;CX3CL1;BSG;TGFB2;VAV1;SLIT2;CD74	14.236	2.7763e-36
GOBP_EPITHELIAL_CELL_PROLIFERATION	CDH3;PDCD6;CDK4;CDK6;CDKN1B;YAP1;FST;PHB2;OSR2;SGPP2;CPB2;CTNNB1;GPBAR1;ARX;DLX5;DRD2;AGTR1;EGF;EGFR;ERBB2;AKT1;ESR1;F3;FGF1;FGF2;FGF9;FGFR2;FLT1;SIRT1;FSHB;GATA2;GATA3;INTU;GLI1;ANG;ANGPT1;HGF;HIF1A;HMGB1;NR4A1;ID2;IGF1;APOE;IGFBP3;RBPJ;IHH;IL6;IL10;IL12B;AR;ITGB3;JUN;AREG;KDR;ARG1;HES5;LAMB1;LEP;ARNT;MIRLET7B;MIR10B;MIR126;MIR132;MIR181C;MIR200C;MIR21;TACSTD2;MIR22;MIR27B;MIR29C;MIR34A;SMAD3;MD…	4.21918	3.13045e-36
GOBP_PRODUCTION_OF_MOLECULAR_MEDIATOR_OF_IMMUNE_RESPONSE	NOD1;CD226;LILRB1;PHB2;FCRL3;CD55;EPHB2;ERCC1;F2RL1;SIRT1;PTPN22;GATA3;ANGPT1;MSH6;TBX21;HK1;HLA-DPB1;HLA-DQB1;HLA-DRB1;HLA-G;HSPD1;APOA2;IL1B;IL1R1;IL2;IL4;IL6;IL10;IL13;IL17A;IL18;KIR2DL4;ARG1;LGALS4;MIF;MLH1;MSH2;FOXP3;AXL;B2M;PTPRC;IL21;BCL6;STAT6;TCF3;BTK;TGFB1;TGFB2;TGFB3;TLR3;TLR4;TNF;TNFRSF1B;TWIST1;CCR2;XBP1;XRCC4;IL18R1;BCL10;IL33;CD86;CD36;CD40LG;CD74	5.29125	4.67904e-36
GOBP_POSITIVE_REGULATION_OF_LEUKOCYTE_MIGRATION	DNM1L;CXCL13;CCR1;CCR7;CSF1;CSF1R;IL34;CX3CR1;EDN1;AIF1;F2RL1;FPR2;DAPK2;MSTN;HMGB1;ICAM1;IL1A;IL1R1;IL4;IL6;CXCL8;CXCR2;CXCL10;ITGA2;ITGB3;LGALS3;LGALS9;MDK;KITLG;MMP14;SERPINE1;IL23A;PGF;TREM2;MAPK1;MAPK3;PTN;RARRES2;CCL1;CCL5;CCL19;CCL21;CX3CL1;CXCL12;WNK1;ADAM17;TACR1;THBS1;THY1;TNF;CCR2;VEGFA;VEGFC;ZP3;CD47;CD74	9.86668	5.62273e-36
GOBP_REGULATION_OF_SYSTEM_PROCESS	ADA;ABCC9;MYL9;SCN11A;CHRM3;LRRK2;ADM;CRH;CRHR1;PARP1;ADRA1A;CCN2;ADRA2B;CYP19A1;ACE;DRD2;AGT;HBEGF;AGTR1;AGTR2;EDN1;EDNRA;AIF1;ENO1;F2R;F2RL1;FGA;FOXO1;FOXO3;DICER1;GBA;MSTN;GJA1;FOXP1;TNFRSF21;GPER1;GSTM2;HGF;NR4A1;APOA2;IGF1;APOE;IL1A;IL2;AQP1;IL10;INHA;INHBA;ITGA2;KCNQ1;KISS1;LEP;MIR143;MIR145;MIR17;MIR20A;MIR200C;MIR21;MIR214;SMAD3;SMAD4;MDM2;MECP2;MMP2;NOS1;NOS3;NOTCH1;OPRM1;OXTR;P2RX3;PIK3…	3.80481	5.71115e-36
GOBP_REGULATION_OF_CELL_PROJECTION_ORGANIZATION	UST;PLXNC1;YAP1;CARM1;SEMA3C;CIB1;PDLIM5;CFL1;LRRK2;CCR7;CNR1;CRABP2;CRK;DOCK11;CRMP1;AGT;MEGF8;EPHA3;EPHB2;EPO;AKT1;EZH2;F2RL1;FKBP4;DKK1;PLXND1;NEDD4L;FN1;LPAR3;MTOR;GATA3;MSTN;INTU;MYLIP;GSK3B;HDAC2;HGF;ICAM1;APOE;IGF1R;ITGA2;USP17L2;L1CAM;RHOG;LIMK1;LYN;MIR200C;MIR21;MIR210;MIR214;TACSTD2;MAP2;MDK;NFE2L2;NGF;NTRK2;NTRK3;PAK1;SERPINF1;PIK3CA;TREM2;MAP2K1;PSEN1;B2M;PTEN;SEMA6A;PTN;PTPRD;BDNF;CC…	3.54532	5.98951e-36
GOBP_HEART_DEVELOPMENT	CDKN1A;CDKN1B;YAP1;SEMA3C;PDLIM5;AKAP13;ADM;CREB1;MAPK14;ADRA1A;CTNNB1;ACE;AGT;DUSP6;S1PR1;EDN1;EDNRA;MEGF8;EGFR;EPHB4;EPOR;ERBB2;FBN1;FGF2;FGF9;FGFR2;DKK1;NCOA6;PLXND1;FN1;HEY1;MTOR;GATA3;GATA6;GREM1;GJA1;ANKRD1;FOXP1;CACYBP;PDCD4;GLI1;GLI3;GPER1;HIF1A;HOXA13;ID2;IGF1;IGF1R;CCN1;RBPJ;IHH;IL1A;ILK;INHBA;INSR;ITGB1;JUN;KCNQ1;KDR;LOX;MIR145;MIR17;MIR195;MIR20A;MIR200B;MIR204;MIR21;SMAD2;SMAD3;SMAD4…	3.74428	9.3868e-36
GOBP_RESPONSE_TO_XENOBIOTIC_STIMULUS	NAT2;CDH3;CDK4;ABCC4;CDKN1B;SEMA3C;TXNIP;SCN11A;CYP2R1;COL1A1;CPB2;CREB1;ADRA1A;CTNNB1;CYP1A1;CYP1A2;CYP1B1;CYP2B6;CYP2C19;CYP3A4;CYP26A1;ACE;AKR1C1;DNMT3A;DRD2;DUSP6;EDN1;AHR;EMX2;FOXO3;FMO2;FOS;GATA3;GATA6;AMH;ANKRD1;GSTM1;GSTM2;GSTP1;HDAC2;APEX1;HSD11B2;APOA2;IL1B;IL10;INHBA;ITGA2;ITGB3;JUN;KCNQ1;ARG1;LHCGR;LOX;LTA;LYN;MAOB;MAS1;MDK;MMP2;MYC;NFE2L2;NOS1;NOS2;OGG1;TNFRSF11B;OXTR;PCNA;PDGFA;PGF;…	4.49847	1.05992e-35
GOBP_REGULATION_OF_ION_TRANSPORT	ABCC9;LILRB2;CFTR;LILRB1;SCN11A;CHRM3;PHB2;FCRL3;CCR1;CNR1;CRH;CRHR1;CNIH3;CTNNB1;ADRA2B;DAPK1;ACE;DPP6;DRD2;AGT;EDN1;EDNRA;EGF;EPHB2;EPO;AKT1;F2;F2R;NEDD4L;GDNF;GPER1;REM1;GSTM2;IFNG;IL1A;IL1B;IL13;IL16;CXCL10;ITGB1;ITGB3;KCNQ1;KCNQ2;ARG1;LEP;LGALS3;LHCGR;LYN;MIR200C;MIR21;MIR210;MIR33A;MIR34A;MAOB;MIF;CXCL9;MMP9;NOS1;NOS3;OPRM1;OXTR;P2RX3;P2RX5;P2RY6;PDGFRB;PIK3CG;TREM2;PSEN1;B2M;PTGS2;BAX;BCL2…	3.44562	1.09575e-35
GOBP_NEGATIVE_REGULATION_OF_IMMUNE_EFFECTOR_PROCESS	LILRB1;FCRL3;CRK;CX3CR1;CD55;AHR;ANGPT1;TBX21;ANXA1;HLA-B;HLA-G;APOA2;IL2;IL4;IL7R;IL10;KIR2DL4;KLRC1;ARG1;LGALS3;LGALS9;FOXP3;ENPP3;AXL;PTPRC;BCL6;TGFB1;TGFB2;TGFB3;SERPING1;TNF;TWIST1;CCR2;IL33;CD47	11.7907	1.44222e-35
GOBP_TISSUE_HOMEOSTASIS	CDH3;YAP1;CLCN3;CLDN3;CSF1;CSF1R;CSK;CCN2;CTNNB1;S1PR1;ERCC6;ESRRB;ALB;F2R;FSHB;GATA2;GJA1;ANGPT1;ACACA;HOXA13;IAPP;IHH;IL6;IL7;IL17A;ITGB1;ITGB3;KDR;KRAS;LTF;MUC2;MUC4;NOS3;NOTCH1;TNFRSF11B;PRKCA;B2M;PTGS2;BAX;RB1;BCL2;ACTB;SLC1A1;SLC2A1;SOD1;SOX9;SPP1;SRC;TFF3;TLR4;CLDN5;VEGFA;CALCA;DCSTAMP;PROM1;CLDN1	5.95322	1.64057e-35
GOBP_SENSORY_ORGAN_DEVELOPMENT	BCL2L11;TSHZ1;CDKN1B;CEBPA;CTHRC1;OSR2;CTNNB1;CYP1A1;CYP1B1;DLX5;DRD2;EDN1;EDNRA;EGFR;EPHB2;ESRRB;FBN1;FGF2;FGF9;FGFR2;ZHX2;FLT1;FJX1;NECTIN3;GATA2;GATA3;GJB2;INTU;GLI3;HDAC1;HDAC2;HIF1A;HOXA13;RBPJ;IHH;FASLG;AQP1;AQP5;INHBA;JUN;KCNQ1;KDR;HES5;SMAD3;NHS;NOTCH1;NTF4;NTRK2;NTRK3;PAX2;PDGFA;PDGFRA;PDGFRB;SERPINF1;DLL4;MED1;BNC2;MAPK1;MAPK3;PSEN1;BAX;NECTIN1;RARB;BCL2;RORB;SDC4;SLC1A1;BMP4;BMP7;BMPR1…	3.84342	1.71307e-35
GOBP_HOMEOSTASIS_OF_NUMBER_OF_CELLS	ADA;BCL2L11;CDK6;ADAR;CCR7;DOCK11;MAPK14;CSF1;CX3CR1;EPO;ERCC2;AKT1;ETS1;EZH2;F2R;FOXO3;GATA2;GATA3;GBA;TMOD3;SLC40A1;ANXA1;HIF1A;HMGB1;ID2;FAS;IL2;IL2RA;IL6;IL7;IL7R;CXCR2;INHA;INHBA;KCNQ1;KRAS;LGALS9;ARNT;LYN;KITLG;MIF;MYB;NOS3;NOTCH1;FOXP3;KLF13;PIK3CB;PIK3CD;PLA2G2A;MED1;AXL;ST6GALNAC1;B2M;BAX;RB1;BCL2;BCL6;BMP4;SOD1;SOX9;STAT3;ADAM17;BTK;THRA;VEGFA;ZFP36;CASP3;CARD11;BCL10;ACVR1B;SFXN1;CD74;…	5.65669	1.88916e-35
GOBP_PEPTIDYL_TYROSINE_MODIFICATION	CSF1R;CSF2;CSF3;CSK;IL34;ADRA1A;ACE;AGT;HBEGF;EGF;EGFR;EPHA3;EPHB2;EPHB4;EPO;ERBB2;ERCC6;FGFR2;FLT1;MTOR;GREM1;GH1;ANGPT1;HCK;HDAC2;HGF;IFNG;IGF1;IGF1R;IL2;IL4;IL6;IL7;IL9;IL11;IL12B;IL13;IL15;IL18;INSR;ITGA5;ITGB3;JAK1;AREG;KDR;HES5;LEP;LIF;LYN;MET;KITLG;MIF;MST1R;NTF3;NTRK2;NTRK3;PDGFA;PDGFRA;IL23A;PDGFRB;ERRFI1;TREM2;PPP2R1A;AXL;MAPK3;MAP2K1;MAP2K7;PRLR;PSEN1;PTPRC;IL21;ROS1;CCL5;SFRP1;SFRP2;S…	4.80347	2.04278e-35
GOBP_RESPONSE_TO_TUMOR_NECROSIS_FACTOR	CEBPA;CIB1;CHUK;COL1A1;MAPK14;CYP1B1;EDN1;AKT1;F2RL1;FOXO3;SIRT1;FOS;GATA3;GBA;ANKRD1;FOXP1;TNFRSF21;GPER1;GSTP1;BIRC2;BIRC3;FAS;CXCL8;ILK;MIR142;MIR27B;MIR30C2;MIR31;MIR34A;NFE2L2;NFKB1;NFKBIA;MAPK1;MAPK3;MAP2K7;PTGS2;CXCL16;RELA;CCL1;CCL2;CCL5;CCL11;CCL14;CCL16;CCL17;CCL19;CCL21;CCL22;CCL25;CX3CL1;SELE;SFRP1;SLC2A4;BRCA1;ADAM17;TDGF1;THBS1;TNF;TNFRSF1A;TNFRSF1B;TP53;VCAM1;TRPV1;ZFP36;CALCA;ACTN…	6.28306	3.53141e-35
GOBP_POSITIVE_REGULATION_OF_KINASE_ACTIVITY	RASGRP1;CDKN1A;CDKN1B;CIB1;AKAP13;PHB2;CKS1B;LRRK2;CCR7;CSF1;CSF1R;CSK;IL34;ADRA1A;ADRA2B;ACE;DRD2;AGT;HBEGF;EDN1;EGF;EGFR;EGR1;EPHA3;EPHB2;EPHB4;EPO;ERBB2;AKT1;ERCC6;EZH2;F2;FGF1;FGF2;FGFR2;DKK1;FLT1;SIRT1;MTOR;GREM1;GH1;ANG;ANGPT1;HLA-DRB1;IFNG;IGF1;IGF1R;CCN1;IL1B;IL2;IL4;IL12B;IL18;INSR;ITGB3;AREG;KDR;LEP;LTF;LYN;MIR143;MIR21;MAS1;MET;KITLG;MIF;MNAT1;MST1R;NTF3;NTRK2;NTRK3;PAK1;PDGFA;PDGFRA;I…	4.10562	5.44688e-35
GOBP_POSITIVE_REGULATION_OF_CHEMOTAXIS	DNM1L;CXCL13;CCR1;CCR7;CSF1;CSF1R;IL34;CX3CR1;S1PR1;EDN1;MEGF8;AIF1;F2RL1;F3;FGF2;FPR2;DAPK2;MSTN;HMGB1;IL4;IL6;CXCL8;CXCR2;IL16;CXCL10;ITGA2;KDR;LGALS9;SMAD3;MDK;MET;NTF3;NTRK3;SERPINE1;IL23A;PDGFRB;PGF;TREM2;MAPK1;MAPK3;PTN;RARRES2;CCL1;CCL5;CCL19;CCL21;CXCL12;SMOC2;WNK1;ADAM17;TGFB1;THBS1;CCR2;VEGFA;VEGFC;CXCR4;CASR;NRP1;ARTN;SLIT2;CD74	9.83961	5.81054e-35
GOBP_NEGATIVE_REGULATION_OF_CYTOKINE_PRODUCTION	CDH3;LILRB1;CCR7;CD200R1;SIRPA;CSK;CX3CR1;EPHB2;EZH2;F2;F2RL1;FN1;DICER1;PTPN22;GATA3;GATA6;GBA;IL37;TNFRSF21;PDCD4;ANGPT1;CD274;GSTP1;TBX21;ANXA1;HGF;HLA-DRB1;HMGB1;APOA2;IFNG;IGF1;IL4;IL6;IL10;IL12B;IL13;IDO1;INHA;INHBA;ARG1;LGALS9;LTF;MIR100;MIR132;MIR142;MIR145;MIR17;MIR181C;MIR195;MIR20A;MIR200B;MIR200C;MIR204;MIR205;MIR21;MIR27B;MIR31;MIR34A;CD200;NFKB1;MIR378A;FOXP3;IL23A;ERRFI1;TREM2;PPAR…	4.84304	7.96126e-35
GOBP_CYTOKINE_PRODUCTION_INVOLVED_IN_IMMUNE_RESPONSE	NOD1;CD226;LILRB1;CD55;F2RL1;SIRT1;GATA3;ANGPT1;TBX21;HK1;HLA-G;APOA2;IL1B;IL1R1;IL4;IL6;IL10;IL18;KIR2DL4;ARG1;MIF;FOXP3;AXL;B2M;BCL6;BTK;TGFB1;TGFB2;TGFB3;TLR3;TLR4;TNF;TNFRSF1B;TWIST1;CCR2;IL18R1;BCL10;CD36;CD74	11.6034	8.85227e-35
GOBP_SECOND_MESSENGER_MEDIATED_SIGNALING	ADA;CIB1;CXCR6;CCR9;CHRM3;LRRK2;CCR1;CCR5;CCR7;CCR8;ADM;CREB1;CX3CR1;AGT;AGTR1;AGTR2;EDN1;EGFR;AHR;FCGR3A;FPR1;FPR2;MTOR;NR5A2;NR5A1;GHRHR;CXCR3;GSK3B;GSTM2;IGF1;APOE;CXCL8;CXCR1;CXCR2;AQP1;KDR;LHCGR;NOS1;NOS2;NOS3;P2RX3;P2RX5;TREM2;PPP2R1A;ACKR3;PTBP1;PTGFR;PTPRC;SELE;SOX9;BTK;THBS1;TNF;CCR2;UCN;VCAM1;VEGFA;CXCR4;NDNF;CD36	5.38007	1.11699e-34
GOBP_LIPID_BIOSYNTHETIC_PROCESS	CDK4;CFTR;CYP2R1;SGPP2;ADM;CRABP2;CREB1;CRH;CYP1A1;CYP1A2;CYP3A4;CYP11A1;CYP17A1;CYP19A1;EDN1;EGR1;AKT1;FGF1;FGF2;AKR1B1;SIRT1;ALOX15;MTOR;FSHB;NR5A1;GBA;HPGDS;ANG;GPER1;GPX4;NR3C1;GSTM1;GSTM2;GSTP1;ANXA1;ACACA;HSD3B1;HSD3B2;HSD17B1;HSD17B3;HSD17B2;APOA2;HSD17B13;IFNG;APOE;IGF1R;IGFBP7;CCN1;IL1A;IL1B;IMPA2;LBR;LEP;LHB;LHCGR;LIPC;MIR132;MIR204;MIR30C1;MIR33A;MIF;ATM;NFKB1;HSD17B7;PDGFA;PIK3CA;PIK3…	3.36437	1.21347e-34
GOBP_NEUTROPHIL_MIGRATION	DNM1L;OLFM4;CXCL13;CCR7;DPP4;EDN1;DAPK2;CXCL1;IL1A;IL1B;IL1R1;CXCL8;CXCR1;CXCR2;CXCL10;RHOG;LGALS3;MDK;CXCL9;IL23A;PF4;PF4V1;PIK3CD;PIK3CG;CCL1;CCL2;CCL5;CCL11;CCL14;CCL16;CCL17;CCL19;CCL21;CCL22;CCL25;CXCL5;CX3CL1;BSG;TGFB2;VAV1;SLIT2;CD74	10.6864	1.91266e-34
GOBP_MUSCLE_TISSUE_DEVELOPMENT	YAP1;SEMA3C;PDLIM5;PPARGC1A;AKAP13;CREB1;MAPK14;ADRA1A;CTNNB1;DDX5;AGT;S1PR1;EDN1;EDNRA;EGR1;FGF2;FGF9;FGFR2;DKK1;HEY1;FOS;MTOR;GATA6;GREM1;MSTN;GJA1;ANKRD1;FOXP1;GLI1;NR4A1;ID2;IGF1;RBPJ;IHH;ITGB1;KRAS;LOX;MIR143;MIR145;MIR195;MIR200B;MIR204;SMAD3;SMAD4;NOTCH1;PDGFRA;PDGFRB;DLL4;PPARA;MED1;RBFOX1;PTEN;RARB;RB1;BCL2;RGS4;BMP4;BMP7;SOX9;SOX15;TCF21;NR2F2;TGFB1;TGFB2;TGFBR1;TWIST1;VEGFA;WT1;FZD7;RU…	4.44004	3.26798e-34
GOBP_RESPONSE_TO_INTERFERON_GAMMA	SIRPA;DAPK1;EDN1;AIF1;HCK;IFNG;IFNGR1;FASLG;IL12B;IL12RB1;JAK1;ARG1;LGALS9;MRC1;NOS2;PPARG;MED1;CXCL16;CCL1;CCL2;CCL5;CCL11;CCL14;CCL16;CCL17;CCL19;CCL21;CCL22;CCL25;CX3CL1;TDGF1;TLR2;TLR3;TLR4;TNF;TP53;VIM;NLRC5;CLDN1;CD47;CD74;CDC42	9.94788	3.41655e-34
GOBP_EMBRYO_DEVELOPMENT_ENDING_IN_BIRTH_OR_EGG_HATCHING	ADA;PDCD6;BCL2L11;YAP1;CDX1;CEBPA;SEMA3C;CTHRC1;OSR2;COL1A1;ADM;CSF2;CTNNB1;ACE;EDN1;EDNRA;MEGF8;EGFR;ERCC2;AKT1;ESRRB;FGF2;FGF9;FGFR2;DKK1;HEY1;NR5A2;GABPA;GATA2;GATA3;GATA6;FOXD3;INTU;GLI3;ANGPT1;DNMT3L;HIF1A;HOXA11;HOXB4;HSD17B2;IGF1;CCN1;RBPJ;IHH;IL10;AR;ITGB1;HES5;LIF;ARNT;SMAD2;SMAD3;SMAD4;MMP14;MSH2;ATM;NOS3;NOTCH1;YBX1;PAX2;PDGFRA;PLG;POU5F1;MED1;MAPK1;SULF2;MAP2K1;PSEN1;SALL4;BCL2L1;BRD2…	3.45707	4.26494e-34
GOBP_REGULATION_OF_ACTIN_FILAMENT_BASED_PROCESS	AKAP13;CCR7;CRK;CSF1R;CSF3;CCN2;S1PR1;EDN1;EPHA3;F2RL1;ALOX15;MTOR;LMOD1;TMOD3;HCK;IL1A;ITGB3;RHOC;RHOG;STMN1;LIMK1;MIR20A;MIR21;MIR214;TACSTD2;SMAD3;SMAD4;MDK;MET;NTF3;NTRK3;PAK1;PDGFA;PDGFRA;PDGFRB;PIK3CA;WNT4;RHOF;PTGER4;ACTA2;RASA1;RGS4;ROCK1;CCL11;CCL21;CX3CL1;SDC4;CXCL12;SFRP1;FSCN1;BRAF;STC1;TACR1;TEK;TGFB3;TGFBR1;EZR;ARHGAP28;NRP1;SLIT2;CD47;SEMA3E;CDC42	4.52636	4.72742e-34
GOBP_SMALL_GTPASE_MEDIATED_SIGNAL_TRANSDUCTION	RASGRP1;CDKN1A;CDKN2A;CFL1;AKAP13;CRK;DOCK11;CSF1;ADRA1A;DNMT1;DOK1;AGTR1;AIF1;EPHB2;EPO;F2R;F2RL1;FGF2;FOXM1;NUP62;IGF1;APOE;ITGAV;ITGB1;JUN;KRAS;RHOC;RHOG;STMN1;LIMK1;MET;KITLG;NGF;NGFR;NOTCH1;NRAS;PDGFRB;PIK3CB;PIK3CG;RHOF;RAF1;RASA1;RB1;BCL6;ROCK1;SRC;TGFB2;TP53;VAV1;ARHGAP28;BCAR3;NRP1;SQSTM1;SLIT2;GRAP2;CDC42	3.96383	1.73617e-33
GOBP_UROGENITAL_SYSTEM_DEVELOPMENT	BCL2L11;CDKN1B;YAP1;OSR2;LRRK2;CTNNB1;CYP19A1;CYP26A1;ACE;AGT;AGTR1;AGTR2;EDNRA;EGR1;EMX2;EPHB2;ESR1;FBN1;FGF1;FGF2;FGFR2;FKBP4;AKR1B1;PLXND1;GATA2;GATA3;GREM1;GDNF;AMH;GLI1;GLI3;ANGPT1;ANGPT2;ANXA1;HOXA10;HOXA11;HOXA13;HPGD;TNC;CXCR2;AQP1;AQP2;ILK;AR;ITGB3;HES5;LIF;TACSTD2;EPCAM;SMAD2;SMAD3;SMAD4;MME;MMP2;MMP9;MYC;NOTCH1;PAX2;PDGFA;PDGFRA;PDGFRB;SERPINF1;WNT4;SULF2;PRLR;PTEN;BAX;ACTA2;RARB;BCL2;…	4.8016	1.99099e-33
GOBP_CARBOHYDRATE_DERIVATIVE_METABOLIC_PROCESS	ADA;DNM1L;UST;MTCO2P12;HPSE;PPARGC1A;GALNT6;LRRK2;CCR7;PARP1;CTNNB1;DCN;AKR1C1;AKR1C2;HBEGF;EDNRA;EGF;TET3;ENO1;EXTL3;FGF2;AKR1B1;PLCB1;MTOR;GALNT3;GALT;GBA;ANGPT1;HAS1;HIF1A;HK1;ACACA;HPRT1;IFNG;IGF1;IHH;IL1B;IL4;IL15;INSR;ITGB8;LEP;ARNT;MIR17;MIR20A;MIR31;MMP12;NFKB1;NME1;NT5E;OGG1;PDGFRB;ENPP1;ENPP3;TREM2;PPARA;PPT1;ST6GALNAC1;SULF2;PSEN1;BAX;BCL2;CCL19;CCL21;GORASP1;SLC2A4;BMPR1B;STAT3;SULT1E…	2.76468	2.14621e-33
GOBP_ION_TRANSMEMBRANE_TRANSPORT	ABCB6;ABCC9;ABCC4;MTCO2P12;CFTR;SCN11A;CHRM3;PHB2;CLCN3;ANO4;CCR5;CCR7;CLDN4;CRH;CRHR1;ADRA1A;CCN2;CNIH3;CYB5A;DAPK1;DPP6;DRD2;AGT;EDN1;EDNRA;EPHB2;EPO;F2;F2R;FGF2;NEDD4L;SLC7A8;GJA1;GPER1;REM1;GSTM2;SLC40A1;ANXA2;IFNG;FASLG;AQP1;IL13;CXCL10;ITGAV;ITGB1;ITGB3;KCNQ1;KCNQ2;ARG1;LHCGR;LYN;MIR200C;MIR21;MIR210;CXCL9;MMP9;NOS1;OPRM1;P2RX3;P2RX5;P2RY6;PIK3CG;TREM2;ANKH;PSEN1;PTPRC;BAX;BCL2;RGS4;S100A6;…	2.70065	4.24926e-33
GOBP_RESPONSE_TO_OXYGEN_LEVELS	ADA;CDKN1B;NDRG1;PHB2;UCN3;COL1A1;ADM;CLDN3;CCN2;CYP1A1;ACE;DNMT3A;DPP4;DRD2;EDN1;EDNRA;EGR1;ENO1;EPO;AKT1;FOXO1;FOXO3;SIRT1;FOS;MTOR;GATA6;ANG;ANGPT2;HDAC2;HIF1A;BIRC2;HSD11B2;RBPJ;FAS;IL1A;AQP1;ITGA2;MALAT1;LEP;LTA;ARNT;MIR126;MIR145;MIR17;MIR21;MIR210;MIR214;MIR34A;SMAD3;SMAD4;MDM2;MECP2;MMP2;MMP14;MYC;ATM;NFE2L2;NOS1;NOS2;NOTCH1;OXTR;P2RX3;PDGFA;PDGFRB;PGF;PIK3CB;PLAU;TREM2;PPARA;PPARG;PTEN;P…	4.98145	4.4963e-33
GOBP_RESPONSE_TO_INTERLEUKIN_1	SIRPA;EDN1;EGR1;EPO;PLCB1;ANKRD1;ANXA1;HIF1A;IL1B;IL1R1;IL1RN;IL6;CXCL8;IL17A;LGALS9;MIR142;MIR204;MIR21;MMP2;NFKB1;PRKCA;MAPK3;MAP2K7;RELA;CCL1;CCL2;CCL5;CCL11;CCL14;CCL16;CCL17;CCL19;CCL21;CCL22;CCL25;CX3CL1;SELE;SFRP1;SOX9;SRC;IL1R2;HYAL2;USP10;CD47	9.53149	5.82606e-33
GOBP_HEMOSTASIS	MYL9;HPSE;CPB2;MAPK14;ADRA2B;EDN1;EPHB2;F2;F2R;F2RL1;F3;FBLN1;FGA;FN1;ANXA2;FOXA2;APOE;IL6;ILK;ITGA2;ITGB3;KNG1;LYN;NFE2L2;NOS3;SERPINE1;SERPINB2;PDGFA;PDGFRA;PF4;PF4V1;SERPINA1;PIK3CA;PIK3CB;PIK3CG;PLAU;PLG;PRKCA;AXL;ACTB;SRC;THBS1;TLR4;SERPING1;VAV1;VTN;VWF;ACTN1;WNT3A;CD36;ENTPD1;CD40LG	6.31748	8.37019e-33
GOBP_CELL_CYCLE	SRA1;BCL2L11;KIF20A;CDK4;CDK6;CDKN1A;CDKN1B;CDKN2A;PAK4;CDKN3;CEBPA;CIB1;ZNRD2;TXNIP;KHDRBS1;CTCF;DCTN6;CFL1;LILRB1;BRD8;NUDT6;PHB2;CKS1B;ZFP42;MAPK14;CCN2;PDIK1L;CTNNB1;CYP1A1;DNMT3A;DRD2;DUSP1;EDN1;EDNRA;EGF;EGFR;AHR;EIF4EBP1;AIF1;ERCC1;ERCC2;AKT1;ERCC6;ESRRB;EZH2;FANCD2;FEN1;FGF2;FGFR2;FOXM1;PLCB1;SIRT1;ITGB3BP;NUP62;POLDIP2;GATA3;GATA6;GJA1;GLI1;GPER1;NR3C1;MSH6;GTF2H1;TMOD3;DNMT3L;ANXA1;H2AX…	2.28647	1.21674e-32
GOBP_CELLULAR_RESPONSE_TO_PEPTIDE	BCL2L11;CDK4;NOD1;CRHR1;CRHR2;CRK;PARP1;CSK;CYP1B1;CYP11A1;AGT;AGTR1;AGTR2;EDN1;EDNRA;AHSG;EPHB2;AKT1;FBN1;FOXO1;FOXO3;PLCB1;SIRT1;FOS;FPR2;PTPN22;MSTN;GH1;GHRHR;GJA1;GJB2;GNRHR;GPER1;GSK3B;NR4A1;APEX1;ICAM1;IGF1;IGF1R;IGFBP1;IL1B;INHBA;INSR;ITGB3;JAK1;ARG1;LEP;LHCGR;LYN;MIR143;MIR145;MIR195;MIR200A;MAS1;MDM2;NFE2L2;NFKB1;NGFR;ENPP1;PIK3CA;ERRFI1;TREM2;PPARG;PRKCB;PSEN1;RARRES2;RB1;RELA;ROCK1;SHC…	4.59369	1.22578e-32
GOBP_NEGATIVE_REGULATION_OF_CELLULAR_COMPONENT_ORGANIZATION	LILRB2;YAP1;CARM1;SEMA3C;CIB1;LILRB1;PRRT2;LRRK2;CLDN7;CRMP1;PARP1;ACE;DPP4;DUSP1;S1PR1;EPHA3;EPHB2;ERCC1;AKT1;FKBP4;DKK1;LMOD1;GBA;MYLIP;GSK3B;TMOD3;ANXA2;HDAC2;HGF;HMGB1;BIRC2;BIRC5;APOA2;IAPP;IGF1;APOE;IL1B;CXCL10;AR;ITGAV;ITGB3;STMN1;LGALS3;LIF;MIR142;MIR17;MIR20A;MIR205;MIR21;MIR210;MIR214;TACSTD2;MIR27B;MIR31;SMAD4;MAP2;MET;MMP14;MNAT1;ATM;NOTCH1;PIK3CA;PLK1;TREM2;PON1;PPARG;PSEN1;B2M;PSMD1…	3.29002	1.37339e-32
GOBP_VASCULAR_PROCESS_IN_CIRCULATORY_SYSTEM	ABCC9;ABCC4;UTS2;CHRM3;ADM;CRP;ADRA1A;ADRA2B;ACE;AGT;AGTR1;AGTR2;EDN1;EDNRA;F2R;F2RL1;FGA;SLC7A8;ANGPT1;GPER1;APOE;CXCR2;INSR;KNG1;LEP;LEPR;MIR21;MMP2;NOS1;NOS3;OXTR;PTGS2;ACTA2;ROCK1;SLC1A1;SLC2A1;SLC2A3;SLC2A4;SLC6A4;SOD1;SOD2;SRC;TACR1;TEK;TGFB1;CLDN5;TNF;UCN;VEGFA;CALCA;SLC38A1;CASR;SLIT2;CD36	5.67363	1.42546e-32
GOBP_REGULATION_OF_GROWTH	BCL2L11;CDK4;CDKN1A;CDKN1B;CDKN2A;PAK4;YAP1;SEMA3C;CIB1;AGR2;CRABP2;CREB1;MAPK14;CSF1;ARX;DPYSL2;DRD2;AGT;HBEGF;DUSP6;AGTR1;AGTR2;EDN1;MEGF8;EGFR;ENO1;ERBB2;AKT1;ESR2;EXTL3;F2;FGF2;FGF9;FGFR2;PLCB1;NEDD4L;FN1;SIRT1;LPAR3;SH3BP4;MTOR;GATA6;GREM1;MSTN;GH1;GHRH;GHRHR;GJA1;FOXP1;GLI1;GSK3B;HIF1A;TNC;IGF1;APOE;IGFBP1;IGFBP3;IGFBP7;RBPJ;IHH;IL2;IL7;IL9;INHBA;INSR;AR;L1CAM;LEP;LIMK1;MIR200B;MIR204;SMAD3…	3.50463	1.67724e-32
GOBP_CELLULAR_METAL_ION_HOMEOSTASIS	ABCB6;CCR1;CCR5;CCR7;DRD2;AGT;EDN1;EDNRA;F2;F2R;FGF2;GPER1;CCDC22;GSTM2;SLC40A1;HIF1A;IFNG;APOE;IL1A;FASLG;IL13;CXCL10;ITGB3;LHCGR;LYN;MIR210;SMAD4;CXCL9;MYC;NOS1;P2RY6;PIK3CB;RMDN3;PRKCB;PSEN1;PTPRC;BAX;BCL2;CCL1;CCL5;CCL11;CCL14;CCL19;CCL21;CX3CL1;CXCL12;SLC1A1;SOD1;STC1;THY1;TPT1;TRPC6;CCR2;VDR;TRPV1;CALCA;CASR;STC2;CD19	4.29928	2.15591e-32
GOBP_AMEBOIDAL_TYPE_CELL_MIGRATION	PDCD6;SEMA3C;CIB1;CXCL13;MAPK14;CYP1B1;DCN;DPP4;AGT;HBEGF;AGTR2;EDN1;EDNRA;EGF;MEGF8;EPHB4;AKT1;ETS1;FGF1;FGF2;PLXND1;FN1;SIRT1;CAPN7;MTOR;GATA2;GATA3;GREM1;GDNF;GJA1;FOXP1;ANGPT1;ANGPT2;ANXA1;HAS1;HIF1A;HMGB1;NR4A1;IFNG;APOE;IL4;AQP1;ILK;ITGA2;ITGB1;ITGB3;JUN;KDR;MIR10B;MIR126;MIR132;MIR143;MIR145;MIR20A;MIR200A;MIR200B;MIR200C;MIR204;MIR21;MIR210;TACSTD2;MIR22;MIR27B;MIR29C;MIR30A;MIR31;MECP2;M…	3.9276	2.95401e-32
GOBP_REGULATION_OF_PEPTIDYL_TYROSINE_PHOSPHORYLATION	CSF1R;CSF2;CSF3;IL34;ADRA1A;ACE;AGT;HBEGF;EGF;EGFR;EPO;ERCC6;MTOR;GREM1;GH1;ANGPT1;HDAC2;HGF;IFNG;IGF1;IL2;IL4;IL6;IL7;IL9;IL11;IL12B;IL13;IL15;IL18;ITGA5;ITGB3;AREG;HES5;LEP;LIF;LYN;KITLG;MIF;NTF3;PDGFA;IL23A;ERRFI1;TREM2;PPP2R1A;PSEN1;PTPRC;IL21;CCL5;SFRP1;SFRP2;SHC1;SRC;ADAM17;TDGF1;TGFB1;THY1;TNF;TNFRSF1A;TP53;VEGFA;VTN;TSLP;HYAL2;NRP1;WNT3A;ADIPOQ;CD36;CD44;CD74	5.67587	2.97447e-32
GOBP_NEGATIVE_REGULATION_OF_PHOSPHORUS_METABOLIC_PROCESS	CDKN1A;CDKN1B;CDKN2A;ADAR;CEBPA;CIB1;LRRK2;SIRPA;PARP1;CSK;DRD2;AGT;DUSP1;DUSP6;EPHB2;AKT1;FBLN1;DKK1;SIRT1;NUP62;PTPN22;GBA;GREM1;MSTN;PDCD4;ANGPT1;GSK3B;GSTP1;HGF;FOXA2;IFNG;APOE;IGFBP3;IL1B;IL2;INHA;INHBA;JUN;LGALS3;LYN;MIR132;MIR20A;MIR27B;MIR30C1;MIR34A;MAS1;NTF3;NTRK3;PDGFA;ENPP1;PIK3CB;PLK1;ERRFI1;PPARA;PPARG;PPP2R1A;PSEN1;PTEN;PTPRC;BAX;RB1;ROCK1;MIR483;SFRP1;SFRP2;BMP4;BMP7;STAT3;NR2F2;T…	4.17291	3.60266e-32
GOBP_NEGATIVE_REGULATION_OF_CELL_CELL_ADHESION	LILRB2;LILRB1;CTLA4;ERBB2;AKT1;PTPN22;TNFRSF21;GLI3;CD274;TBX21;ANXA1;HLA-DRB1;HLA-G;HMGB1;IHH;IL1RN;IL2;IL2RA;IL4;IL10;IDO1;ARG1;LGALS3;LGALS9;MIR141;MIR181C;MIR21;MIR31;EPCAM;MDK;NOTCH1;NOTCH4;FOXP3;PLG;PPARA;PTEN;BCL6;CCL21;CCL25;SDC4;CXCL12;WNK1;BMP4;TGFB1;VEGFA;CASP3;RUNX1;RUNX3;ADIPOQ;CD86;CD74;CDH1	6.88078	3.92487e-32
GOBP_INTERLEUKIN_6_PRODUCTION	LILRB2;NOD1;CD200R1;SIRPA;CSK;AIF1;F2R;F2RL1;PTPN22;GBA;IL37;HGF;HLA-B;HMGB1;HSPD1;IFNG;IL1A;IL1B;IL1RAP;IL6;IL10;IL16;IL17A;LEP;LGALS9;MIR132;MIR195;MIR204;CD200;NOS2;FOXP3;IL17D;TREM2;CX3CL1;STAT3;BTK;TLR2;TLR3;TLR4;TNF;TWIST1;TYROBP;UCN;XBP1;TSLP;HYAL2;BCL10;IL33;CD36;CD47;CD74	7.65757	5.74649e-32
GOBP_CELLULAR_ION_HOMEOSTASIS	ABCB6;CFTR;CLCN3;LRRK2;CCR1;CCR5;CCR7;DRD2;AGT;EDN1;EDNRA;F2;F2R;FGF2;GPER1;CCDC22;GSTM2;SLC40A1;HIF1A;IFNG;APOE;IL1A;FASLG;IL13;CXCL10;ITGB3;KCNQ1;LHCGR;LYN;MIR210;SMAD4;CXCL9;MYC;NOS1;P2RY6;ENPP1;PIK3CB;RMDN3;PPT1;PRKCB;MAPK1;MAPK3;PSEN1;PTPRC;BAX;BCL2;CCL1;CCL5;CCL11;CCL14;CCL19;CCL21;CX3CL1;CXCL12;SLC1A1;WNK1;SOD1;STC1;THY1;TPT1;TRPC6;CCR2;VDR;TRPV1;CA2;CALCA;CASR;STC2;CD19	3.81853	6.10063e-32
GOBP_REGULATION_OF_VASCULATURE_DEVELOPMENT	PDCD6;PAK4;CXCL13;ADM;CTNNB1;CX3CR1;CYP1B1;DCN;AGT;ERBB2;ETS1;F3;FGF1;FGF2;PLXND1;FLT1;SIRT1;GATA2;GATA6;GREM1;ANGPT2;HGF;HIF1A;HLA-G;IL1A;IL1B;FASLG;IL6;CXCL8;CXCR2;AQP1;IL10;CXCL10;ITGA5;ITGB1;ITGB3;ITGB8;JAK1;KDR;LEP;MIRLET7B;MIR126;MIR132;MIR143;MIR145;MIR17;MIR20A;MIR200B;MIR21;MIR210;MIR214;MIR27B;MIR29C;MIR30A;MIR30C1;MIR31;MIR34A;MDK;MECP2;NFE2L2;NINJ1;NOS3;MIR375;MIR378A;SERPINE1;SERPINF…	4.66802	9.39692e-32
GOBP_NEGATIVE_REGULATION_OF_IMMUNE_RESPONSE	ADAR;LILRB1;CRK;PARP1;MAPK14;CTLA4;CD55;DRD2;AHR;ALOX15;TBX21;ANXA1;HCK;HLA-B;HLA-DRB1;HLA-G;IL2;IL4;IL7R;IL10;IL12B;KIR2DL4;KLRC1;ARG1;LGALS3;LGALS9;LYN;MIR21;MMP12;FOXP3;PDCD1;ENPP3;TREM2;PPARG;PTPRC;BCL6;SRC;STAT6;SERPING1;CCR2;NLRC5;IL33	7.13686	9.57648e-32
GOBP_POSITIVE_REGULATION_OF_TUMOR_NECROSIS_FACTOR_SUPERFAMILY_CYTOKINE_PRODUCTION	RASGRP1;NOD1;LRRK2;EPHB2;FCGR3A;HDAC2;HMGB1;IFNG;IFNGR1;IL1A;IL6;IL12B;IL17A;LEP;LGALS9;MIR27B;MIF;IL23A;PF4;PSEN1;PTPRC;CCL19;STAT3;BTK;THBS1;TLR2;TLR3;TLR4;TWIST1;CCR2;TYROBP;BCL10;IL33;CD14;CD86;CD36	11.6924	9.74406e-32
GOBP_PATTERN_RECOGNITION_RECEPTOR_SIGNALING_PATHWAY	NOD1;PHB2;FCRL3;ESR1;F2RL1;PTPN22;HMGB1;BIRC2;BIRC3;HSPD1;TICAM2;USP17L2;LGALS9;LTF;LYN;MIR17;MBL2;NFKBIA;NINJ1;TREM2;RELA;BTK;TLR2;TLR3;TLR4;TNF;BCL10;CD14;CD36	7.0749	1.4567e-31
GOBP_RESPONSE_TO_METAL_ION	PDCD6;ABCB6;CDKN1B;NDRG1;CEBPA;TXNIP;CHUK;LRRK2;CREB1;PARP1;CYP1A1;CYP1A2;DNMT3A;DRD2;EDN1;EGFR;ERCC1;AKT1;FGA;FOS;ALOX15;SLC40A1;HIF1A;HSD17B1;IL1A;AQP1;AQP2;IMPA2;JUN;ARG1;MAOB;MMP9;MNAT1;NFE2L2;OGG1;TNFRSF11B;PCNA;SERPINF1;PPP5C;MAPK1;MAPK3;MAPK8;B2M;PTGS2;CCND1;BCL2;SDC1;SLC1A1;SOD1;SOD2;BRAF;BSG;SYT1;TERT;THBS1;TSPO;VCAM1;CASP3;CASR;CAT;AKR1C3;BECN1;CLDN1;CD14;CDK1;CDH1	4.63061	1.6148e-31
GOBP_REGULATION_OF_DNA_BINDING_TRANSCRIPTION_FACTOR_ACTIVITY	CDKN2A;NOD1;CIB1;PPARGC1A;PHB2;CHUK;CSF3;CTH;CTNNB1;CX3CR1;CYP1B1;AGT;EDN1;AKT1;ESR1;ESR2;EZH2;FANCD2;SIRT1;GREM1;AMH;GLI1;GLI3;CCDC22;HCK;HDAC2;FOXA2;ID2;IL1B;IL1RAP;IL6;IL10;IL18;AR;LGALS9;LTF;MIR21;MIR30C2;SMAD3;CD200;NFKBIA;FOXP3;ENPP1;PPARG;PRKCB;MAPK3;MAPK8;PSMD10;PTEN;RB1;RELA;CX3CL1;BMP7;STAT3;TCF3;BTK;TFDP1;TLR2;TLR3;TLR4;TNF;TWIST1;VEGFA;NLRC5;NR0B2;CARD11;CAT;IL18R1;BCL10;WNT3A;HAND2;C…	4.05385	1.84479e-31
GOBP_REGULATION_OF_MONONUCLEAR_CELL_MIGRATION	KLRC4-KLRK1;CXCL13;CCR1;CCR7;CD200R1;CRK;CSF1;CSF1R;IL34;CX3CR1;DUSP1;AIF1;AKT1;KLRK1;PLCB1;FPR2;GREM1;MSTN;HMGB1;IL4;CXCL10;ITGB3;LGALS3;LGALS9;LYN;MDK;CD200;SERPINE1;MAPK1;MAPK3;RARRES2;CCL1;CCL2;CCL5;CCL21;CXCL12;WNK1;ADAM17;THBS1;TNF;CCR2;SLIT2;CD47	10.3285	2.16374e-31
GOBP_ALPHA_BETA_T_CELL_ACTIVATION	ADA;LILRB1;CD55;IL27;MTOR;PTPN22;GATA3;FOXP1;GLI3;CD274;TBX21;ANXA1;HLA-DRB1;HMGB1;IFNG;IHH;IL2;IL2RA;IL4;IL6;IL12B;IL12RB1;IL15;IL18;LGALS9;MIR21;MYB;FOXP3;IL23A;PTGER4;PTPRC;IL21;BCL2;BCL6;CCL19;BRAF;STAT3;STAT6;CCR2;TYK2;CARD11;RUNX1;RUNX3;IL18R1;CD86	7.55063	2.80983e-31
GOBP_REGULATION_OF_PROTEIN_SERINE_THREONINE_KINASE_ACTIVITY	RASGRP1;CDKN1A;CDKN1B;CDKN2A;CDKN3;CEBPA;CIB1;AKAP13;CKS1B;LRRK2;CSF1R;CSK;IL34;AGT;DUSP1;EDN1;EGF;EGFR;ERBB2;AKT1;EZH2;FGF1;FGF2;DKK1;FLT1;SIRT1;NUP62;PTPN22;GBA;GH1;PDCD4;GSTP1;GTF2H1;IFNG;APOE;IL1B;INSR;LTF;LYN;MIR20A;MIR34A;KITLG;MIF;MNAT1;MST1;MST1R;NTF3;NTRK3;PAK1;HERC5;PDGFA;PDGFRB;PIK3CB;PIK3CG;PLK1;PPARG;MAP2K1;MAP2K7;PSEN1;PSMD10;PTEN;PTPRC;RB1;CCND1;ACTB;CCL19;SFRP1;SFRP2;BMP4;BMP7;BMP…	4.33891	3.70175e-31
GOBP_REGULATION_OF_LIPID_METABOLIC_PROCESS	CDK4;PPARGC1A;PHB2;CCR7;CNR1;ADM;CREB1;TTC39B;EGR1;AKT1;F2;FGF1;FGF2;FLT1;FMO2;SIRT1;MTOR;FSHB;NR5A1;GPER1;NR3C1;ANXA1;HPGD;APOA2;ID2;HSD17B13;IFNG;APOE;IGF1R;IGFBP7;CCN1;IL1A;IL1B;LEP;LHCGR;LYN;MIR132;MIR204;MIR30C1;MIR33A;NFKB1;PDGFA;PDGFRA;PDGFRB;PIK3CG;TREM2;WNT4;PPARA;UGT1A1;PPARG;PTGS2;RARRES2;CCL19;CCL21;SNAI2;SNAI1;SOD1;SOX9;SRC;BRCA1;STAR;TEK;TGFB1;TSPO;THRA;TNF;C3;TWIST1;AKR1C3;IRS2;CD1…	4.68611	4.88514e-31
GOBP_POSITIVE_REGULATION_OF_PROTEIN_KINASE_ACTIVITY	RASGRP1;CDKN1A;CDKN1B;CIB1;AKAP13;PHB2;CKS1B;LRRK2;CCR7;CSF1;CSF1R;CSK;IL34;ADRA1A;ADRA2B;ACE;DRD2;AGT;HBEGF;EDN1;EGF;EGFR;EGR1;EPO;ERBB2;AKT1;ERCC6;EZH2;FGF1;FGF2;DKK1;FLT1;SIRT1;MTOR;GREM1;GH1;ANG;ANGPT1;IFNG;IGF1;CCN1;IL1B;IL4;IL12B;IL18;INSR;ITGB3;AREG;LEP;LTF;MIR143;MIR21;MAS1;KITLG;MIF;MNAT1;MST1R;NTF3;NTRK3;PAK1;PDGFA;IL23A;PDGFRB;PIK3CA;PIK3CG;MAP2K1;MAP2K7;PRLR;PSEN1;PSMD10;PTPRC;CCND1;C…	4.18338	5.00708e-31
GOBP_REGULATION_OF_CELLULAR_RESPONSE_TO_STRESS	BCL2L11;RASGRP1;NOD1;AGR2;BRD8;LRRK2;CCR7;CRK;SIRPA;PARP1;CCN2;CTNNB1;DDX5;DUSP1;EGFR;ENO1;EPO;ERCC1;AKT1;ERCC6;F2RL1;FOXM1;FOXO1;FOXO3;PLCB1;SIRT1;MTOR;PTPN22;GREM1;ANKRD1;FOXP1;PDCD4;GSK3B;GSTP1;H2AX;HGF;HIF1A;HMGB1;IGF1R;IGFBP6;FAS;IL1A;IL1B;IL10;LEP;LGALS9;LYN;MIRLET7B;MIR132;MIR145;MIR17;MIR195;MIR20A;MIR21;MIR210;MIR34A;MDM2;MET;MIF;MMP3;MUC1;MYC;ATM;NFE2L2;OGG1;OPRM1;PCNA;PIK3CB;TREM2;MAPK…	3.17288	9.73109e-31
GOBP_HUMORAL_IMMUNE_RESPONSE	CXCL13;PHB2;CCR7;CD55;DEFB4A;CFD;F2;FGA;GATA3;GATA6;TNFRSF21;ANG;CXCL1;HLA-DQB1;HLA-DRB1;CFI;IFNA1;IFNA13;IFNG;RBPJ;IL1B;IL6;IL7;CXCL8;IL17A;CXCL10;LGALS4;LTA;LTF;SH2D1A;MBL2;CXCL9;NOTCH1;PDCD1;PF4;PF4V1;TREM2;PTPRC;RARRES2;BCL2;RNASE3;CCL2;CXCL5;SLPI;SERPING1;TNF;C1R;C3;C5;C9;ZP3;MS4A1;CXCL14	4.9247	1.03207e-30
GOBP_REGULATION_OF_CATABOLIC_PROCESS	MIR543;BCL2L11;DNM1L;TOB1;CDK4;CDKN1B;NOD1;CEBPA;DEPP1;LRRK2;CNR1;MAPK14;ADRA1A;DAPK1;DCN;EGF;EGFR;ELAVL1;AKT1;FOXO1;FOXO3;SIRT1;DAPK2;SH3BP4;MTOR;RNF19A;POLDIP2;PTPN22;GBA;GDNF;CCDC22;MYLIP;GSK3B;ANXA2;HGF;HIF1A;HMGB1;HP;HPGD;APEX1;APOA2;IFNG;IGF1;APOE;IL1B;IL4;IL6;IL10;INSR;ITGB1;KDR;LEP;LEPR;ARNT;MIRLET7B;MIR21;MIR210;SMAD3;SMAD4;MDM2;MET;MLH1;ATM;NFE2L2;NOS2;YBX1;PIK3CA;PIK3CB;PIK3CG;PLK1;TRE…	2.77166	1.22376e-30
GOBP_LYMPHOCYTE_MIGRATION	KLRC4-KLRK1;CXCL13;CCR7;CD200R1;CRK;S1PR1;AIF1;AKT1;KLRK1;GATA3;GBA;TBX21;ICAM1;CXCL10;ITGB3;CD200;PIK3CD;PIK3CG;CXCL16;CCL1;CCL2;CCL5;CCL11;CCL14;CCL16;CCL17;CCL19;CCL21;CCL22;CCL25;CX3CL1;CXCL12;WNK1;ADAM17;CCR2;ARTN	10.1536	1.24415e-30
GOBP_ORGANONITROGEN_COMPOUND_BIOSYNTHETIC_PROCESS	ADA;MIR543;ABCB6;UST;TOB1;EIF1;CEBPA;KHDRBS1;MTCO2P12;PPARGC1A;GALNT6;CCR7;SGPP2;PARP1;CTH;CTNNB1;CYP1B1;DAPK1;DIO2;HBEGF;EGF;EIF4EBP1;ELAVL1;TET3;ENO1;EPO;ERBB2;AKT1;EXTL3;FOXO3;PLCB1;MTOR;GALNT3;GATA3;GATM;GBA;ANG;ANGPT1;GSTM1;GSTP1;HAS1;HIF1A;ACACA;HPRT1;APOA2;IGF1;APOE;CCN1;IL1B;IL4;IL6;IL15;IDO1;INHA;INHBA;EIF3E;ITGA2;ARG1;LGALS4;MIR100;MIR10B;MIR132;MIR145;MIR148A;MIR17;MIR181C;MIR20A;MIR20…	2.24156	1.4547e-30
GOBP_DIVALENT_INORGANIC_CATION_HOMEOSTASIS	CCR1;CCR5;CCR7;ADM;DRD2;EDN1;EDNRA;F2;F2R;FGF2;GPER1;GSTM2;APOE;FASLG;IL13;CXCL10;ITGB3;KDR;LHCGR;LYN;CXCL9;NOS1;NT5E;P2RY6;PIK3CB;RMDN3;PRKCB;ANKH;PSEN1;PTPRC;BAX;BCL2;CCL1;CCL5;CCL11;CCL14;CCL19;CCL21;CX3CL1;CXCL12;SLC1A1;STC1;THY1;TPT1;TRPC6;CCR2;VDR;TRPV1;CALCA;CASR;STC2;CD19	4.5424	2.01775e-30
GOBP_NEGATIVE_REGULATION_OF_PHOSPHORYLATION	CDKN1A;CDKN1B;CDKN2A;ADAR;CEBPA;CIB1;LRRK2;SIRPA;CSK;DRD2;AGT;DUSP1;DUSP6;EPHB2;AKT1;FBLN1;DKK1;SIRT1;NUP62;PTPN22;GBA;GREM1;MSTN;PDCD4;ANGPT1;GSTP1;HGF;FOXA2;IFNG;APOE;IGFBP3;IL1B;IL2;INHA;INHBA;JUN;LYN;MIR132;MIR20A;MIR27B;MIR34A;MAS1;NTF3;NTRK3;ENPP1;PIK3CB;PLK1;ERRFI1;PPARA;PPARG;PPP2R1A;PSEN1;PTEN;PTPRC;BAX;RB1;ROCK1;MIR483;SFRP1;SFRP2;BMP4;BMP7;STAT3;NR2F2;TGFB1;THY1;UCHL1;CASP3;IRS2;HYAL2;…	4.36859	2.44584e-30
GOBP_ORGANIC_HYDROXY_COMPOUND_METABOLIC_PROCESS	CDH3;CEBPA;CETP;CFTR;CYP2R1;SGPP2;COMT;CYP1A1;CYP1A2;CYP1B1;CYP3A4;TTC39B;CYP11A1;CYP19A1;CYP26A1;AKR1C1;AKR1C2;DIO2;DRD2;EDNRA;FGF1;FGF2;AKR1B1;PLCB1;SIRT1;ALOX15;NR5A2;GATA3;GBA;GC;GPER1;HIF1A;HPRT1;HSD11B2;HSD17B1;HSD17B3;APOA2;IFNG;IGF1;APOE;IL4;IMPA2;ITGAM;LBR;LEP;LEPR;LHCGR;LIPC;LIPE;CYP4F3;MIR210;MIR30C1;MIR33A;MAOA;MAOB;MAS1;MECP2;NFKB1;P2RY6;HSD17B7;WNT4;PON1;MED1;PTEN;BCL2;SLC1A1;SNAI2;…	3.58449	2.46066e-30
GOBP_REGULATION_OF_LYMPHOCYTE_MEDIATED_IMMUNITY	KLRC4-KLRK1;RASGRP1;CD226;LILRB1;CRK;CD55;AHR;KLRK1;CADM1;NCR3;GATA3;TBX21;HLA-B;HLA-DRB1;HLA-G;HMGB1;HSPD1;IL1B;IL1R1;IL2;IL4;IL6;IL7R;IL10;IL12B;IL12RB1;IL18;KIR2DL4;KLRC1;ARG1;LEP;LGALS9;LTA;SH2D1A;MLH1;MSH2;FOXP3;IL23A;TREM2;B2M;PTPRC;PVR;IL21;BCL6;STAT6;BTK;TGFB1;TNF;TNFRSF1B;C3;CCR2;VAV1;ZP3;IL18R1	7.19691	2.46528e-30
GOBP_CATION_TRANSMEMBRANE_TRANSPORT	ABCB6;ABCC9;MTCO2P12;SCN11A;PHB2;CLCN3;CCR5;CCR7;CRH;CRHR1;ADRA1A;CCN2;CNIH3;CYB5A;DAPK1;DPP6;DRD2;AGT;EDN1;EDNRA;EPHB2;EPO;F2;F2R;FGF2;NEDD4L;SLC7A8;GPER1;REM1;GSTM2;SLC40A1;ANXA2;IFNG;FASLG;AQP1;IL13;CXCL10;ITGAV;ITGB1;ITGB3;KCNQ1;KCNQ2;ARG1;LHCGR;LYN;MIR200C;MIR21;MIR210;CXCL9;MMP9;NOS1;OPRM1;P2RX3;P2RX5;P2RY6;PIK3CG;TREM2;PSEN1;PTPRC;BAX;BCL2;RGS4;CCL2;CCL19;CCL21;CX3CL1;SLC1A1;WNK1;SLC6A4;SL…	2.81845	2.67614e-30
GOBP_CHEMOKINE_PRODUCTION	SIRPA;CSF1R;EGR1;AIF1;F2RL1;FOXP1;GSTP1;HIF1A;HMGB1;IFNG;IL1B;IL6;IL7;IL10;IL17A;IL18;LGALS9;MIR34A;MIF;TREM2;SNAI2;ADAM17;TLR2;TLR3;TLR4;TNF;C5;TWIST1;TSLP;IL33;ADIPOQ;CD74	12.2785	2.75917e-30
GOBP_MYELOID_LEUKOCYTE_DIFFERENTIATION	CDK6;CEBPA;LILRB1;CCR1;CCR7;CREB1;PARP1;MAPK14;CSF1;CSF1R;CSF2;CSF3;IL34;CTNNB1;F2RL1;FBN1;SIRT1;FOS;MTOR;FSHB;GATA2;GATA3;GBA;FOXP1;ANXA2;HLA-DRB1;IAPP;ID2;IFNG;RBPJ;IL4;IL12B;IL15;IL17A;INHA;INHBA;ITGB8;JUN;LBR;LGALS9;LIF;LTF;LYN;MIR145;KITLG;MMP9;MYC;TNFRSF11B;IL23A;PF4;PIK3CD;TREM2;PPARG;MED1;PRKCA;PSEN1;RB1;CCL19;SFRP1;BMP4;SRC;TGFB1;KLF10;TLR2;TLR3;TLR4;TNF;TYROBP;VEGFA;DCSTAMP;RUNX1;ADIPOQ…	6.20867	2.90733e-30
GOBP_RESPONSE_TO_KETONE	CDK4;YAP1;TXNIP;POSTN;CFTR;UCN3;CCR7;CLDN4;CREB1;PARP1;CYP1B1;ACE;AKR1C2;EDN1;AHR;EPO;AKT1;FOXO3;SIRT1;FOS;GBA;MSTN;GJB2;FOXP1;NR3C1;ACACA;HOXA10;HOXA11;HOXA13;HSD3B1;HSD3B2;IGF1R;IGFBP7;AQP1;AR;ARG1;MAOB;MIR342;NTRK3;OXTR;P2RY6;PAPPA;FOXP3;PCNA;SERPINF1;PIK3CA;ERRFI1;TRERF1;PTGER2;PTGER4;PTGFR;CCND1;BCL2L1;CCL19;CCL21;SFRP1;SLIT3;SPP1;SRC;SRD5A1;SRD5A2;TACR1;KLF9;TGFB1;TGFB2;TGFB3;THBS1;TSPO;TLR…	6.48953	3.91147e-30
GOBP_INTERFERON_GAMMA_PRODUCTION	KLRC4-KLRK1;RASGRP1;CD226;LILRB1;CCR7;SIRPA;F2RL1;KLRK1;IL27;PTPN22;GATA3;CD274;HLA-DPB1;HLA-DRB1;HMGB1;HSPD1;IL1B;IL1R1;IL2;IL10;IL12B;IL12RB1;IL18;INHA;INHBA;LGALS9;LTA;FOXP3;IL23A;AXL;IL21;TLR3;TLR4;TNF;CCR2;TYK2;ZP3;IL18R1;IL33;CD14;CD47	10.1426	4.00033e-30
GOBP_I_KAPPAB_KINASE_NF_KAPPAB_SIGNALING	NOD1;AKAP13;CHUK;CCR7;SIRPA;CTH;CTNNB1;CX3CR1;EDN1;EDNRA;AKT1;ESR1;F2R;F2RL1;SIRT1;NUP62;GJA1;ANGPT1;CCDC22;GSTP1;HDAC1;HLA-DRB1;BIRC2;BIRC3;TICAM2;IL1A;IL1B;FASLG;RHOC;LGALS1;LGALS9;LTF;MIR195;MIR27B;NFKBIA;TREM2;PPP5C;PRKCB;RELA;ROCK1;S100A4;S100B;CCL19;CCL21;CX3CL1;SLC20A1;BTK;TLR2;TLR3;TLR4;TNF;TNFRSF1A;CARD11;TNFSF10;SQSTM1;BCL10;USP10;ADIPOQ;CD36;CD74	5.11877	5.98159e-30
GOBP_REGULATION_OF_CYTOSKELETON_ORGANIZATION	CDKN1B;CIB1;AKAP13;CCR7;CRK;CSF1R;CSF3;CCN2;S1PR1;EDN1;EPHA3;F2RL1;FKBP4;NUP62;ALOX15;MTOR;LMOD1;GSK3B;TMOD3;HCK;IL1A;ITGB3;RHOC;RHOG;STMN1;LIMK1;MIR20A;MIR21;MIR214;TACSTD2;SMAD3;SMAD4;MAP2;MDK;MECP2;MET;NTF3;NTRK3;PAK1;PDGFA;PDGFRA;PDGFRB;PIK3CA;PLK1;WNT4;RHOF;MAPK1;MAPK3;PTGER4;RASA1;RGS4;AFAP1;ROCK1;CCL11;CCL21;CX3CL1;SDC4;CXCL12;SFRP1;FSCN1;BRCA1;BRAF;TACR1;TEK;TGFB3;TGFBR1;EZR;ARHGAP28;NRP1…	3.59983	7.14646e-30
GOBP_POSITIVE_REGULATION_OF_ERK1_AND_ERK2_CASCADE	RASGRP1;NOD1;CIB1;PHB2;CCR1;CCR7;CSF1R;ADRA1A;CCN2;GPBAR1;DRD2;EGFR;EPO;F2R;F2RL1;FGA;FGF1;FGF2;FGFR2;FPR2;ALOX15;FSHR;PTPN22;ANGPT1;GPER1;HLA-DRB1;HMGB1;ICAM1;IGF1;APOE;IL1A;INHBA;ITGB3;JUN;KDR;LGALS9;MIRLET7B;MIR126;MIR21;MIR27B;MIF;NOTCH1;NTRK2;NTRK3;OPRM1;P2RY6;PDGFA;PDGFRA;PDGFRB;PLA2G2A;TREM2;PRKCA;MAPK3;MAP2K1;MAP2K7;ACKR3;PTEN;PTPRC;ACTA2;CCL1;CCL2;CCL5;CCL11;CCL14;CCL16;CCL17;CCL19;CCL21…	5.98353	8.53008e-30
GOBP_RESPONSE_TO_CHEMOKINE	CIB1;CXCL13;CXCR6;CCR9;CCR1;CCR5;CCR7;CCR8;CX3CR1;DUSP1;EDN1;CXCR3;CXCL1;HIF1A;CXCL8;CXCR1;CXCR2;CXCL10;LOX;LYN;CXCL9;PF4;PF4V1;TREM2;ACKR3;CCL1;CCL2;CCL5;CCL11;CCL14;CCL16;CCL17;CCL19;CCL21;CCL22;CCL25;CXCL5;CX3CL1;CXCL12;WNK1;SLIT3;CCR2;CXCR4;SLIT2	12.3115	8.8371e-30
GOBP_CELLULAR_RESPONSE_TO_INTERFERON_GAMMA	SIRPA;DAPK1;EDN1;AIF1;HCK;IFNG;IFNGR1;FASLG;IL12B;IL12RB1;JAK1;ARG1;LGALS9;MRC1;NOS2;PPARG;MED1;CCL1;CCL2;CCL5;CCL11;CCL14;CCL16;CCL17;CCL19;CCL21;CCL22;CCL25;CX3CL1;TDGF1;TLR2;TLR3;TLR4;TNF;TP53;VIM;NLRC5;CLDN1;CD47;CDC42	10.1314	1.28613e-29
GOBP_CELL_MATRIX_ADHESION	BCL2L11;CDK6;CDKN2A;CIB1;HPSE;CCR7;CSF1;CCN2;CTNNB1;EPHA3;FGA;FN1;POLDIP2;GREM1;GSK3B;ILK;ITGA2;ITGA5;ITGAM;ITGAV;ITGB1;ITGB3;ITGB8;KDR;L1CAM;MIR29C;SMAD3;MMP12;MMP14;MUC4;SERPINE1;PIK3CB;PLAU;WNT4;PTEN;RASA1;BCL2;BCL6;ROCK1;CCL21;CCL25;CX3CL1;SDC4;SFRP1;SRC;TEK;THBS1;THY1;UTRN;VCAM1;VEGFA;VTN;SKAP1;ACTN1;NRP1;CD36;CD44;SEMA3E	5.73659	1.58077e-29
GOBP_CELLULAR_RESPONSE_TO_EXTERNAL_STIMULUS	CDKN1A;POSTN;UCN3;LRRK2;COL1A1;COMT;AGT;AIF1;ERCC6;ALB;FGF2;FOXO1;FOXO3;SIRT1;FOS;MTOR;GBA;ANKRD1;FOXA2;IGF1R;FAS;IL1B;AQP1;AQP2;IL13;IL15;ITGA2;ITGB3;LEP;LYN;NFE2L2;NFKB1;WNT4;KRT20;PPARA;MED1;AXL;MAPK1;MAPK3;MAPK8;PTGER4;PTGS2;PTPRC;BCL2;RXRA;SFRP1;SFRP2;SLC2A1;SNAI2;SOX9;SRD5A1;KLF10;TLR3;TLR4;TNFRSF1A;TP53;USF2;VCAM1;VDR;XBP1;MAP1LC3B;CASR;AKR1C3;NCOA1;BECN1;BCL10;UCN2;IL33;CD68	4.70565	1.72595e-29
GOBP_CELL_MORPHOGENESIS_INVOLVED_IN_NEURON_DIFFERENTIATION	UST;PLXNC1;SEMA3C;PDLIM5;CFL1;LRRK2;CRABP2;CREB1;CRMP1;CSF1R;ARX;DLX5;DPYSL2;DRD2;EDN1;EDNRA;MEGF8;EPHA3;EPHB2;EPHB4;ERBB2;FGFR2;PLXND1;NEDD4L;FN1;LPAR3;GATA3;GDNF;GLI3;GSK3B;HPRT1;APOE;IGF1R;ITGB1;L1CAM;RHOG;LAMC2;STMN1;LIMK1;SMAD4;MAP2;NCAM1;NGF;NGFR;NOTCH1;NTRK2;PAK1;PAX2;ROBO4;MAP2K1;PSEN1;PTEN;SEMA6A;PTN;PTPRD;NECTIN1;RB1;BCL2;ACTB;BDNF;S100A6;S100B;CXCL12;GORASP1;BMP7;BMPR1B;SLIT3;SOD1;SPP1…	3.49946	1.74069e-29
GOBP_POSITIVE_REGULATION_OF_CHEMOKINE_PRODUCTION	CSF1R;EGR1;AIF1;F2RL1;HIF1A;HMGB1;IFNG;IL1B;IL6;IL7;IL17A;IL18;LGALS9;MIF;ADAM17;TLR2;TLR3;TLR4;TNF;C5;TWIST1;TSLP;IL33;ADIPOQ;CD74	17.9911	1.79459e-29
GOBP_NEGATIVE_REGULATION_OF_PROTEIN_MODIFICATION_PROCESS	CDKN1A;CDKN1B;CDKN2A;ADAR;CEBPA;CIB1;LRRK2;SIRPA;CTNNB1;DNMT1;DNMT3B;DRD2;AGT;DUSP1;DUSP6;EPHB2;AKT1;FBLN1;DKK1;SIRT1;NUP62;PTPN22;GBA;GREM1;PDCD4;ANGPT1;GSK3B;GSTP1;HDAC2;HGF;IFNG;APOE;IGFBP3;IL1B;IL2;JUN;USP17L2;LGALS3;LIMK1;LYN;MIR132;MIR20A;MIR27B;MIR34A;MAS1;NTF3;NTRK3;FOXP3;ENPP1;PIK3CB;PLK1;ERRFI1;PPARG;PPP2R1A;PSEN1;PTEN;PTPRC;BAX;RB1;RELA;ROCK1;MIR483;SFRP1;SFRP2;BMP4;BMP7;BRCA1;NR2F2;TG…	3.64376	1.83816e-29
GOBP_NEGATIVE_REGULATION_OF_LYMPHOCYTE_ACTIVATION	LILRB2;LILRB1;CTLA4;ERBB2;PTPN22;TNFRSF21;GLI3;CD274;TBX21;ANXA1;HLA-DRB1;HLA-G;HMGB1;ID2;IHH;IL2;IL2RA;IL4;IL10;IDO1;INHA;INHBA;ARG1;LGALS3;LGALS9;LYN;MIR181C;MIR21;MDK;ATM;FOXP3;AXL;PTEN;BCL6;SDC4;SFRP1;BMP4;BTK;TYROBP;CASP3;RUNX1;RUNX3;CD86;CD74	7.41494	2.65545e-29
GOBP_REGULATION_OF_LEUKOCYTE_CHEMOTAXIS	KLRC4-KLRK1;DNM1L;CXCL13;CCR1;CCR7;CSF1;CSF1R;IL34;CX3CR1;CYP19A1;DPP4;DUSP1;EDN1;AIF1;F2RL1;KLRK1;FPR2;DAPK2;GREM1;MSTN;HMGB1;IL4;IL6;CXCL8;CXCR2;CXCL10;LGALS9;LYN;MDK;MIF;SERPINE1;IL23A;PGF;MAPK1;MAPK3;PTN;RARRES2;CCL1;CCL2;CCL5;CCL19;CCL21;CXCL12;WNK1;ADAM17;THBS1;C5;CCR2;VEGFA;VEGFC;SLIT2;CD74	9.25627	3.46864e-29
GOBP_POSITIVE_REGULATION_OF_PROTEOLYSIS	PDCD6;BCL2L11;NOD1;CEBPA;LRRK2;CLDN4;CLDN3;CCN2;DAPK1;EGF;ENO1;AKT1;F2R;F3;FBLN1;FN1;SIRT1;RNF19A;GBA;GPER1;CCDC22;GSK3B;ANXA2;HDAC2;HMGB1;HSPD1;IFNG;APOE;CCN1;FAS;IL1B;FASLG;LGALS9;LYN;MIR17;MIR205;MIR21;MIR27B;SMAD3;MDM2;MMP14;MYC;NFE2L2;NGFR;PLK1;TREM2;PPARG;PSEN1;PSMD10;PTEN;BAX;SFRP2;SLC1A1;SRC;STAT3;TNF;TNFRSF1B;BAG6;AXIN1;TNFSF10;BCL10;WNT3A;IL33	4.29386	4.52136e-29
GOBP_MAINTENANCE_OF_LOCATION	CCR5;CCR7;CRP;TTC39B;DRD2;AKT1;ALB;F2;F2R;FBN1;FGF2;SIRT1;NR5A1;GBA;GPER1;CCDC22;GSTM2;ANXA1;HK1;APOE;IL1B;FASLG;IL6;IL10;IL13;CXCL10;ITGAV;ITGB3;LEP;LHCGR;LYN;MIR10B;MIR34A;CXCL9;NFKB1;NFKBIA;NOS1;P2RY6;ENPP1;TREM2;PPARA;PPARG;PSEN1;PSMD10;PTPRC;BAX;CCL19;CCL21;CX3CL1;TSPO;THY1;TNF;C3;TXN;TRPV1;CD19;CD36	4.54063	4.53085e-29
GOBP_RESPIRATORY_SYSTEM_DEVELOPMENT	ADA;YAP1;CEBPA;AGR2;CREB1;CRH;CCN2;CTNNB1;CYP1A2;ACE;DLX5;FGF1;FGF2;FGF9;FGFR2;GATA6;GLI1;GLI3;RBPJ;IL13;KDR;ARG1;KRAS;LIF;LOX;SMAD2;MME;MMP12;MMP14;NOS3;NOTCH1;PDGFA;PDGFRA;PDGFRB;PGR;ERRFI1;MAPK1;MAPK3;MAP2K1;RXFP1;BMP4;SOX9;TCF21;TGFB3;THRA;TNF;VEGFA;WT1;YWHAZ;BAG6;AIMP2;CRISPLD2;ACVR2B;CDC42	6.1499	5.38139e-29
GOBP_CELL_JUNCTION_ASSEMBLY	PDLIM5;CLDN4;CLDN3;CLDN7;CTNNB1;GPBAR1;ACE;DRD2;AGT;EPHA3;EPHB2;DKK1;PLXND1;FN1;POLDIP2;GREM1;GJA1;GJB2;IL1B;IL1RAP;IL17A;ITGA2;ITGA5;ITGB3;KDR;RHOC;MIR142;SMAD3;MECP2;MMP14;NTRK2;NTRK3;CLDN11;OXTR;WNT4;PRKCA;PTEN;PTPRD;NECTIN1;BCL2;ACTB;ROCK1;BDNF;SDC4;SFRP1;SNAI2;SNAI1;FSCN1;SRC;TEK;THBS1;THY1;TLR2;CLDN5;TNF;VEGFA;WNT7A;ACTN1;NRP1;WNT3A;CLDN1;CDC42;CDH1	3.96579	6.81846e-29
GOBP_VIRAL_PROCESS	ADAR;CXCR6;CFL1;CCR5;CSF1R;CD55;DPP4;AGTR1;EGFR;NR5A2;GSK3B;HDAC1;HLA-DRB1;HMGB1;ICAM1;IFI27;IFIT1;APOE;CXCL8;INSR;ISG20;ITGA2;ITGA5;ITGAV;ITGB1;ITGB3;JUN;LGALS1;LGALS9;LTF;MIR141;MIR30C1;MBL2;MRC1;NCAM1;NOTCH1;VTA1;PPARA;SLC52A1;AXL;PTBP1;PVR;NECTIN1;BCL2;BCL2L1;CCL1;CCL2;CCL5;SLPI;BSG;TNF;TP53;USF2;ZFP36;CXCR4;HMGA2;NECTIN4;DENR;HYAL2;NRP1;CLDN1;CD86;CD74;CDK1	4.02395	7.2023e-29
GOBP_REGULATION_OF_CYSTEINE_TYPE_ENDOPEPTIDASE_ACTIVITY	PDCD6;BCL2L11;NOD1;CCN2;DAPK1;AKT1;F2R;F3;SIRT1;GPER1;HGF;HMGB1;NR4A1;BIRC2;BIRC3;BIRC5;HSPD1;CCN1;FAS;FASLG;IL9;AQP1;LGALS9;LTF;MIRLET7B;MIR17;MIR27B;SMAD3;MMP9;MYC;NGFR;PAX2;PPARG;PTGS2;BAX;RAF1;SFRP2;SLC1A1;SOX2;SRC;THBS1;TNF;VEGFA;RNF34;TNFSF10;BCL10;WNT3A;CD44	5.63015	9.04484e-29
GOBP_FOREBRAIN_DEVELOPMENT	CDK6;LRRK2;CREB1;CRK;CSF1R;CTNNB1;ARX;DLX5;DRD2;EGFR;EMX2;EPHB2;EZH2;FGF2;FGFR2;DKK1;PLCB1;CHD5;GATA2;GHRH;GHRHR;FOXP1;GLI1;GLI3;GSK3B;H2AX;HDAC1;HIF1A;HPRT1;HSD3B1;HSD3B2;ID2;IGF1R;RBPJ;AQP1;INHBA;ITGAM;KRAS;HES5;LAMB1;MAS1;MDK;NOTCH1;NTRK2;OXTR;WNT4;AXL;PSEN1;B2M;PTEN;BAX;RARB;CXCL12;SLC2A1;BMP4;SLIT3;SOX2;SRC;SRD5A1;SRD5A2;SSTR1;SSTR4;ZEB1;NR2F2;TYROBP;WNT7A;XRCC1;CXCR4;NDNF;CASP3;NRP1;WNT3A;S…	4.20873	9.5625e-29
GOBP_RESPONSE_TO_TRANSFORMING_GROWTH_FACTOR_BETA	COL1A1;CRK;PARP1;CX3CR1;EDN1;FBN1;FGFR2;SIRT1;FOS;FSHB;MSTN;AMHR2;ANKRD1;NR3C1;HDAC1;HDAC2;HPGD;IGF1R;IL4;ITGB1;ITGB8;JUN;ARG1;LOX;MIR183;MIR21;MIR30A;SMAD2;SMAD3;SMAD4;MIR342;PDGFA;WNT4;PPARA;PPARG;HTRA1;ROCK1;SFRP1;SOX9;SRC;STAT3;ADAM17;ZEB1;TGFB1;TGFB1I1;TGFB2;TGFB3;TGFBR1;THBS1;CLDN5;TP53;WNT7A;TET1;DCSTAMP;AXIN1;RUNX3;HYAL2;CLDN1	5.05378	9.88024e-29
GOBP_OSSIFICATION	TOB1;CDK6;ADAR;YAP1;CEBPA;CTHRC1;OSR2;CCR1;COL1A1;MAPK14;CSF1;VCAN;CCN2;CTNNB1;DDX5;DLX5;S1PR1;EGFR;AHSG;ERCC2;AKT1;FGF2;FGF9;FGFR2;DKK1;ALOX15;GREM1;INTU;GLI1;GLI3;GSK3B;HGF;HIF1A;TNC;IGF1;IGFBP3;CCN1;RBPJ;IHH;IL6;ILK;AREG;LEP;LOX;LTF;MIR17;MIR20A;MIR200C;MIR21;MIR210;SMAD3;SMAD4;MDK;MMP2;MMP9;MMP13;MMP14;NOTCH1;ENPP1;WNT4;PPARG;MAPK1;MAPK3;ANKH;PTGER4;PTGS2;PTN;BCL2;RORB;RXRA;SFRP1;SFRP2;BMP4;B…	3.96861	1.10484e-28
GOBP_LYMPHOCYTE_ACTIVATION_INVOLVED_IN_IMMUNE_RESPONSE	ADA;LILRB1;DOCK11;ERCC1;F2RL1;FCGR3A;IL27;MTOR;GATA3;FOXP1;MSH6;TBX21;ANXA1;HLA-DRB1;HMGB1;HSPD1;ICAM1;IFNA1;IFNA13;IFNG;IL2;IL4;IL6;IL10;IL12B;IL12RB1;IL18;LGALS1;LGALS3;LGALS9;MIR21;MDK;MLH1;MSH2;MYB;FOXP3;IL23A;PSEN1;PTGER4;PTPRC;IL21;BCL6;CCL19;STAT3;STAT6;TGFB1;TLR4;TP53;XBP1;IL18R1;CD19;CD86;CD40LG;CD74	6.16063	1.11517e-28
GOBP_POSITIVE_REGULATION_OF_SECRETION	DNM1L;CFTR;UCN3;CNR1;CPB2;CREB1;CRH;CYP19A1;DRD2;AGT;EDN1;F2RL1;FGA;GATA2;GDNF;GHRH;GHRHR;ANKRD1;ANG;GPER1;ANXA2;HIF1A;HLA-DRB1;IFNG;IGF1;IL1A;IL1B;IL4;AQP1;IL13;INHA;INHBA;ITGAM;KISS1;LEP;SMAD4;MIF;OXTR;TREM2;PPARG;PRL;RETN;PSMD9;SDC1;SDC4;CXCL12;SLC6A4;SPP1;SSTR4;SYT1;TACR1;TGFB1;TGFB2;TGFB3;TLR2;TLR4;TRH;UCN;VEGFC;EZR;VIP;TRPV1;XBP1;ZP3;NR0B2;CASR;IRS2;PTGES	4.80378	1.26314e-28
GOBP_NEGATIVE_REGULATION_OF_DEFENSE_RESPONSE	ADA;ADAR;LILRB1;CD200R1;CRK;SIRPA;PARP1;MAPK14;CYP19A1;DRD2;FPR2;GATA3;GBA;GPER1;GSTP1;HCK;HGF;HLA-B;HLA-DRB1;HLA-G;IGF1;APOE;IL2;IL2RA;IL4;IL10;IL12B;IL13;KIR2DL4;KLRC1;ARG1;LGALS9;LYN;MIR126;MIR141;MIR142;MIR145;MIR181C;MIR195;MIR20A;MIR204;MIR205;MIR21;MIR30C2;MIR31;SMAD3;MDK;MMP12;CD200;NFKB1;NT5E;FOXP3;ENPP3;SERPINF1;TREM2;PPARA;PPARG;HTRA1;PTGER4;MIR488;PTPRC;RB1;CX3CL1;SOD1;SRC;TEK;SERPING…	5.15572	1.29161e-28
GOBP_REGULATION_OF_INNATE_IMMUNE_RESPONSE	KLRC4-KLRK1;RASGRP1;ADAR;CD226;LILRB1;CRK;PARP1;DRD2;KLRK1;FPR2;CADM1;NCR3;PTPN22;HCK;HLA-B;HLA-G;HMGB1;BIRC2;BIRC3;APOE;IL12B;KIR2DL4;KLRC1;ARG1;LEP;LGALS9;LYN;SH2D1A;MIR21;MBL2;MMP12;NFE2L2;PAK1;TREM2;PPARG;MED1;PVR;IL21;CCL5;SRC;TLR4;SERPING1;TYROBP;VAV1;NLRC5	5.55877	1.75434e-28
GOBP_REGULATION_OF_ESTABLISHMENT_OF_PROTEIN_LOCALIZATION	DNM1L;CIB1;CFTR;UCN3;LRRK2;CNR1;MAPK14;CSK;DRD2;ERBB2;F2R;F2RL1;FGA;FOXO1;ANKRD1;GLI3;ANG;ANGPT1;GPER1;GSK3B;HIF1A;HLA-DRB1;FOXA2;IFI27;IFNG;IGF1;APOE;IL1A;IL1B;IL6;IL12B;IL13;ITGAM;USP17L2;LEP;MIR148A;MIR17;MIR30C1;SMAD3;CD200;NOS2;OPRM1;TREM2;KRT20;PPARG;VPS11;MAPK8;PSEN1;PSMD9;PTGS2;CCL5;SFRP1;SLC1A1;BMP4;SRC;TERF1;TGFB1;TGFB2;TGFB3;TLR2;TLR4;TNF;TRH;TXN;VEGFC;EZR;NR0B2;CASR;IRS2;HYAL2;HDAC3;A…	3.55028	2.20537e-28
GOBP_CELLULAR_RESPONSE_TO_INTERLEUKIN_1	SIRPA;EDN1;EGR1;PLCB1;ANKRD1;HIF1A;IL1B;IL1R1;IL1RN;IL6;CXCL8;IL17A;MIR21;MMP2;NFKB1;MAPK3;MAP2K7;RELA;CCL1;CCL2;CCL5;CCL11;CCL14;CCL16;CCL17;CCL19;CCL21;CCL22;CCL25;CX3CL1;SFRP1;SOX9;IL1R2;HYAL2;USP10;CD47	10.2765	2.39517e-28
GOBP_NERVOUS_SYSTEM_PROCESS	CDH3;CDKN1B;LILRB2;MMP24;PRRT2;SCN11A;LRRK2;CNR1;COL1A1;CREB1;CRH;ADRA1A;CX3CR1;ACE;DRD2;AGT;AGTR2;S1PR1;EDN1;EDNRA;EGFR;EPHB2;NR2F6;AKT1;F2R;OR9Q1;FEN1;DKK1;PLCB1;DICER1;FOS;MTOR;GATM;GBA;GJB2;TNFRSF21;GPER1;GSK3B;GSTM2;HGF;HIF1A;NR4A1;BIRC5;IAPP;APOE;IL1A;AQP1;IL10;IL12B;INSR;ITGA2;ITGA5;ITGB1;KCNQ1;KRAS;LHCGR;TACSTD2;MDK;MECP2;MME;MIR342;NGF;NOS3;NTF3;NTF4;NTRK2;OPRM1;OXTR;P2RX3;P2RX5;PAX2;SER…	2.29672	2.52285e-28
GOBP_B_CELL_MEDIATED_IMMUNITY	CD226;CD55;ERCC1;FCGR3A;MSH6;TBX21;HLA-DPB1;HLA-DQB1;HLA-DRB1;HLA-G;HSPD1;CFI;IL2;IL4;IL9;IL10;LTA;MBL2;MLH1;MSH2;FOXP3;TREM2;B2M;PTPRC;BCL6;STAT6;BTK;TGFB1;SERPING1;TNF;C1R;C3;C5;C9;ZP3;BCL10;CD19;CD40LG;CD74	6.02337	3.29746e-28
GOBP_CELL_GROWTH	CDKN1A;CDKN1B;CDKN2A;PAK4;YAP1;SEMA3C;CIB1;PDLIM5;AKAP13;CRABP2;ADRA1A;CTNNB1;DPYSL2;AGT;HBEGF;AGTR1;AGTR2;EDN1;EDNRA;MEGF8;EGFR;ENO1;ERBB2;AKT1;ESR2;EXTL3;F2;NEDD4L;FN1;SIRT1;LPAR3;SH3BP4;MTOR;GREM1;GJA1;FOXP1;GSK3B;TNC;IGF1;APOE;IGFBP1;IGFBP3;IGFBP7;IL2;IL9;INHBA;ITGB1;L1CAM;LIMK1;MIR195;SMAD3;SMAD4;MAP2;MMP14;NGF;NRN1;ENPP1;PPARA;PPP2R1A;ATAD3A;PPT1;PSMD10;SEMA6A;CXCL16;RB1;BCL2;RGS4;BCL6;ROS1…	3.64168	3.42135e-28
GOBP_ANTIGEN_PROCESSING_AND_PRESENTATION	LILRB2;NOD1;CCR7;ACE;GBA;PDIA3;HLA-B;HLA-C;HLA-DPB1;HLA-DQB1;HLA-DRB1;HLA-G;ICAM1;TREM2;B2M;CCL19;CCL21;THBS1;CD68;CD74	10.4574	4.28222e-28
GOBP_B_CELL_ACTIVATION	ADA;RASGRP1;CDKN1A;PHB2;FCRL3;DOCK11;CTLA4;AHR;EPHB2;ERCC1;EZH2;TNFRSF21;MSH6;TBX21;HSPD1;ID2;IFNA1;IFNA13;RBPJ;IL2;IL4;IL6;IL7;IL7R;IL9;IL10;IL11;IL13;INHA;INHBA;ITGB1;LGALS1;LYN;MIF;MLH1;MMP14;MSH2;ATM;FOXP3;PIK3CD;PRKCB;PRLR;PTEN;PTPRC;BAX;IL21;BCL2;BCL6;SFRP1;DCLRE1C;STAT6;ADAM17;TCF3;BTK;TGFB1;TLR4;TP53;TYROBP;VCAM1;XBP1;CASP3;CARD11;IRS2;WNT3A;CD19;MS4A1;CD86;CD40LG;CD74;CD79A;HDAC9	4.42008	4.45978e-28
GOBP_REGULATION_OF_METAL_ION_TRANSPORT	ABCC9;LILRB2;LILRB1;FCRL3;CCR1;CRHR1;CTNNB1;ACE;DPP6;DRD2;AGT;EGF;EPO;AKT1;F2;F2R;NEDD4L;GPER1;REM1;GSTM2;IFNG;IL13;IL16;CXCL10;ITGB1;ITGB3;KCNQ1;LGALS3;LHCGR;LYN;MIR200C;MIR21;MIR210;MIR34A;CXCL9;NOS1;NOS3;P2RX3;P2RX5;P2RY6;PDGFRB;PIK3CG;TREM2;B2M;PTGS2;BAX;BCL2;RGS4;CCL2;CCL5;CX3CL1;CXCL12;WNK1;STC1;TSPO;THY1;TRPC6;UCN;UTRN;VIP;CXCR4;ACTN4;CASR;STC2;CD19;MS4A1	3.93469	5.69044e-28
GOBP_REGULATION_OF_APOPTOTIC_SIGNALING_PATHWAY	BCL2L11;DNM1L;YAP1;LRRK2;PARP1;CSF2;CTH;CTNNB1;CX3CR1;AGT;AGTR2;ENO1;EPO;AKT1;FGA;SIRT1;DAPK2;GDNF;GPER1;PDIA3;GSK3B;GSTP1;HDAC1;HGF;HIF1A;ICAM1;IGF1;FAS;IL1A;IL1B;IL4;IL7;IL9;INHBA;AR;ITGAV;LGALS3;MIR132;MIR17;MIR21;MIR210;MIR27B;MDM2;MIF;MMP9;MUC1;MYC;NFE2L2;NGFR;NOS3;SERPINE1;PF4;PIK3CB;TREM2;WNT4;PPP2R1A;PSEN1;ACKR3;PSMD10;PTEN;PTGS2;PTPRC;BAX;RAF1;RB1;BCL2;RELA;BCL2L1;BDNF;CX3CL1;CXCL12;SFRP…	4.19561	6.46619e-28
GOBP_AGING	CARM1;CNR1;ADM;ADRA1A;CCN2;CYP1A1;ACE;DNMT3A;AGT;EDN1;EDNRA;EPO;ERCC1;ERCC2;FGF2;FOXO3;FOS;NR5A1;AMH;GJB2;GPX4;APEX1;IGF1R;IGFBP1;IL10;IL15;INHBA;ARG1;SMAD4;MME;MMP2;MPO;NFE2L2;OGG1;PAX2;PDGFRB;SERPINF1;RETN;PTGS2;CX3CL1;SRR;SOD1;SOD2;TGFB3;TSPO;TIMP1;SERPING1;TNFRSF1B;VCAM1;CALCA;CAT;BECN1;HYAL2;CLDN1;CD68	7.01748	6.91709e-28
GOBP_POSITIVE_REGULATION_OF_CELL_PROJECTION_ORGANIZATION	PLXNC1;CCR7;CNR1;CRABP2;DOCK11;AGT;MEGF8;EPHA3;EPHB2;EPO;EZH2;F2RL1;PLXND1;FN1;LPAR3;MTOR;MSTN;GSK3B;HGF;APOE;IGF1R;ITGA2;L1CAM;LIMK1;LYN;MIR200C;MIR21;MDK;NFE2L2;NGF;NTRK2;NTRK3;SERPINF1;PIK3CA;MAP2K1;PTN;PTPRD;BDNF;CCL19;CCL21;CX3CL1;CXCL12;BMP7;FSCN1;SRC;BRAF;TGFB3;TGFBR1;VEGFA;NDNF;NRP1;WNT3A;SLIT2;CDC42	4.32235	9.87523e-28
GOBP_DEFENSE_RESPONSE_TO_SYMBIONT	ABCC9;ADAR;LILRB1;PHB2;F2RL1;IL27;PTPN22;BIRC2;BIRC3;IFI27;IFIT1;IFNA1;IFNA13;IFNG;IL1B;IL4;IL6;IL12B;IL12RB1;IL15;CXCL10;ISG20;USP17L2;MBL2;CXCL9;MMP12;FOXP3;HERC5;IL23A;ATAD3A;HTRA1;PTPRC;IL21;BCL2;RELA;BCL2L1;SKP2;TLR2;TLR3;NLRC5;BECN1;HYAL2;IL33	4.68414	1.05105e-27
GOBP_INTERLEUKIN_10_PRODUCTION	LILRB1;F2RL1;TNFRSF21;CD274;HGF;HLA-DRB1;HMGB1;HSPD1;IL4;IL6;IL12B;IL13;IDO1;LGALS9;MIR145;FOXP3;IL23A;TREM2;STAT3;BTK;TLR2;TLR4;TYROBP;TSLP;CD40LG;CD47	18.1468	1.2016e-27
GOBP_LIPID_LOCALIZATION	ABCC4;CETP;CFTR;ANO4;CRABP2;CRH;CRHR1;CRP;TTC39B;CYP19A1;ACE;AKR1C1;DRD2;AGT;AGTR1;EDN1;EGF;AKT1;SIRT1;GBA;ANXA1;ANXA2;APOA2;APOE;IL1A;IL1B;FASLG;IL6;INHBA;AQP9;ITGAV;ITGB3;KCNQ1;LEP;LHCGR;LIPC;LPA;MIR10B;MIR148A;MIR17;MIR27B;MIR30C1;MIR33A;MIR34A;MIF;NFKB1;NFKBIA;NOS2;ENPP1;PLA2G2A;TREM2;PON1;PPARA;PPARG;RETN;PTGS2;RBP1;REN;RXRA;SLC2A1;SPP1;SSTR4;STAR;MIR33B;THBS1;TSPO;TNF;C3;NR0B2;IRS2;ADIPOQ;L…	3.65091	1.20273e-27
GOBP_POSITIVE_REGULATION_OF_T_CELL_PROLIFERATION	LILRB2;CD55;AIF1;EPO;PTPN22;CD274;ANXA1;HLA-DPB1;HMGB1;IGF1;IL1A;IL1B;IL2;IL2RA;IL4;IL6;IL12B;IL12RB1;IL15;IL18;LEP;LGALS9;MIR21;KITLG;FOXP3;IL23A;PTPRC;IL21;CCL5;CCL19;CCR2;TYK2;VCAM1;ZP3;CARD11;CD86;CD40LG	10.4512	1.3774e-27
GOBP_REGULATION_OF_LYMPHOCYTE_DIFFERENTIATION	ADA;RASGRP1;LILRB2;FCRL3;CTLA4;ERBB2;FANCD2;FOXO3;IL27;GATA3;GLI3;TBX21;ANXA1;HLA-DRB1;HLA-G;HMGB1;ID2;IFNG;IHH;IL2;IL2RA;IL4;IL7;IL7R;IL10;IL12B;IL12RB1;IL15;IL18;INHA;INHBA;LGALS9;MIR21;MDK;MMP14;MYB;FOXP3;IL23A;AXL;PTPRC;ACTB;BCL6;CCL19;SFRP1;BMP4;SMARCC1;SOD1;BRAF;ZEB1;BTK;CCR2;XBP1;ARID1A;CARD11;RUNX1;RUNX3;CD86;CD74	5.94254	1.39295e-27
GOBP_NEURON_DEATH	BCL2L11;PPARGC1A;LRRK2;CD200R1;PARP1;CSF1;CSF3;CTNNB1;CX3CR1;AGTR2;EGR1;EPO;AKT1;F2R;DKK1;FOXO3;PLXND1;SIRT1;FOS;GATA3;GBA;GDNF;TNFRSF21;ANGPT1;NR3C1;GSK3B;HIF1A;IFNG;APOE;FAS;FASLG;IL10;IL13;ITGAM;JUN;KDR;KIR3DL2;KRAS;MIR181C;MIR200A;MIR200C;MDK;MECP2;CD200;MSH2;ATM;NGF;NGFR;NTF3;NTF4;NTRK2;SERPINF1;PIK3CA;TREM2;PPARA;PPT1;AXL;MAP2K7;PSEN1;BAX;RASA1;RB1;CCND1;BCL2;BCL2L1;ROCK1;BDNF;CCL2;CCL5;CX3…	4.20792	1.67453e-27
GOBP_CELLULAR_RESPONSE_TO_PEPTIDE_HORMONE_STIMULUS	CDK4;CRHR1;CRHR2;CRK;PARP1;CSK;CYP1B1;CYP11A1;AGT;AGTR1;AGTR2;EDN1;EDNRA;AHSG;AKT1;FBN1;FOXO1;PLCB1;SIRT1;FOS;MSTN;GH1;GHRHR;GJB2;GNRHR;GPER1;GSK3B;NR4A1;APEX1;IGF1R;IGFBP1;IL1B;INHBA;INSR;ITGB3;JAK1;ARG1;LEP;LHCGR;LYN;MIR143;MIR145;MIR195;MAS1;NFE2L2;NFKB1;ENPP1;PIK3CA;ERRFI1;PPARG;PRKCB;RARRES2;RB1;RELA;ROCK1;SHC1;SLC2A4;SMARCC1;SRC;SRD5A1;STAT3;STAT6;TYK2;XBP1;CA2;BCAR3;NCOA1;IRS2;ADIPOQ;HDAC9…	4.64034	1.81194e-27
GOBP_REGULATION_OF_RESPONSE_TO_WOUNDING	HPSE;CPB2;CLDN4;CLDN3;CRK;HBEGF;EDN1;EPHB2;F2;F2R;F2RL1;F3;FGA;FGF2;MTOR;ANXA1;ANXA2;FOXA2;APOE;IGF1R;IL10;ITGB1;KNG1;MIR200B;MIR21;MIR34A;SMAD3;MDK;NFE2L2;NOS3;SERPINE1;SERPINB2;PDGFA;PDGFRA;PLAU;PLG;WNT4;MAP2K1;PTEN;MIR451A;PTN;ACTA2;SMOC2;SPP1;BRAF;THBS1;SERPING1;TNF;VTN;XBP1;CXCR4;CLDN1;CD36	6.81714	2.3623e-27
GOBP_INTRACELLULAR_PROTEIN_TRANSPORT	PDCD6;CDKN1A;CIB1;TXNIP;PHB2;LRRK2;MAPK14;CSE1L;AGT;ELAVL1;ERBB2;AKT1;FGF9;NUP62;GLI3;ANGPT1;GSK3B;HSPA4;HSPD1;IFI27;IFNG;TICAM2;IL1B;ITGAM;USP17L2;LEP;LHCGR;SMAD3;MMP12;NFKBIA;NGFR;NOTCH1;TMED7;MED1;VPS11;MAPK8;PSEN1;PTGS2;BAX;ATG3;SLC1A1;BMP4;STAT3;STX5;TGFB1;TSPO;TP53;TXN;RGPD2;YWHAZ;BAG6;BECN1;HYAL2;HDAC3;SQSTM1;ADIPOQ;CD36;IPO13;CD74;CDK1;CDH1	2.7906	2.55799e-27
GOBP_ACTIN_FILAMENT_ORGANIZATION	CFL1;CCR7;CSF3;CCN2;S1PR1;AIF1;F2RL1;ALOX15;MTOR;LMOD1;ANG;TMOD3;HCK;ITGB1;RHOC;RHOG;STMN1;LIMK1;MIR20A;MIR21;MIR214;TACSTD2;SMAD3;MET;PAK1;PIK3CA;WNT4;RHOF;PTGER4;RASA1;BCL2;RGS4;ROCK1;CCL11;CCL21;CX3CL1;SDC4;CXCL12;SFRP1;FSCN1;SRC;BRAF;TACR1;TGFB3;TGFBR1;TPM3;EZR;ARHGAP28;CALD1;ACTN1;NRP1;SLIT2;CD47;CDC42	3.73718	2.61653e-27
GOBP_REGULATION_OF_SMALL_MOLECULE_METABOLIC_PROCESS	DNM1L;MTCO2P12;PPARGC1A;CNR1;ADM;PARP1;TTC39B;EGR1;ENO1;AKT1;FGF1;FOXO1;FMO2;SIRT1;MTOR;GPER1;NR3C1;ANXA1;HIF1A;FOXA2;IFNG;IGF1;APOE;IGFBP3;IL1B;IL4;INSR;LEP;LEPR;LHCGR;ARNT;MIR132;MIR204;MIR21;MIR210;MIR30C1;MIR33A;MAS1;MST1;NFKB1;NOS1;NOS2;NOS3;P2RY6;TREM2;WNT4;PPARA;PPARG;PSEN1;PTGS2;SNAI2;SNAI1;SOD1;SOX9;SRC;BRCA1;STAR;STAT3;TFF3;TSPO;TNF;TP53;TWIST1;AKR1C3;IRS2;ADIPOQ;NCOR1;CD74	4.36549	3.15344e-27
GOBP_MONOCARBOXYLIC_ACID_METABOLIC_PROCESS	PPARGC1A;CNR1;CRABP2;MAPK14;CYP1A1;CYP1A2;CYP1B1;CYP2B6;CYP2C19;CYP3A4;CYP26A1;AKR1C1;AKR1C2;DECR1;EDN1;ENO1;AKT1;AKR1B1;FMO2;SIRT1;ALOX15;MTOR;NR5A2;GATM;HPGDS;GPX4;GSTM1;GSTM2;GSTP1;ANXA1;HIF1A;HK1;ACACA;HPGD;IFNG;IGF1;IL1B;IDO1;INSR;LEP;LIPC;ARNT;CYP4F3;MIR132;MIR204;MIR210;MIR30C1;MIR33A;MIF;UGT2B28;PPARA;UGT1A1;PPARG;PSEN1;PTGS2;RBP1;SRR;SOX9;BRCA1;STAR;STAT3;SULT2A1;TNFRSF1A;TP53;C3;TWIST1;…	3.21906	4.17378e-27
GOBP_POSITIVE_REGULATION_OF_INTERLEUKIN_6_PRODUCTION	LILRB2;NOD1;AIF1;F2R;F2RL1;HMGB1;HSPD1;IFNG;IL1A;IL1B;IL1RAP;IL6;IL16;IL17A;LEP;LGALS9;NOS2;IL17D;STAT3;BTK;TLR2;TLR3;TLR4;TNF;TWIST1;TYROBP;UCN;XBP1;TSLP;HYAL2;BCL10;IL33;CD36;CD74	10.8648	4.28785e-27
GOBP_REGULATION_OF_CELL_DEVELOPMENT	PLXNC1;YAP1;SEMA3C;CIB1;OLFM4;LILRB1;LRRK2;CRABP2;CRK;IL34;CTNNB1;CX3CR1;ACE;DRD2;MEGF8;EPHB2;AKT1;EZH2;F2;FBLN1;FBN1;FGA;FGF2;KIFAP3;PLXND1;PLCB1;FN1;DICER1;HEY1;LPAR3;MTOR;GLI3;GPER1;GSK3B;ANXA2;HDAC1;HDAC2;HIF1A;HOXA11;ID2;IFNG;IGF1;IL1A;IL1B;IL6;ILK;ITGB1;ITGB3;KRAS;HES5;L1CAM;LIF;LIMK1;LTA;LTF;LYN;MIR142;MIR181C;TACSTD2;SMAD4;MAP2;MDK;MECP2;MME;NGF;NOTCH1;NTRK2;NTRK3;OPRM1;PAEP;SERPINF1;TREM…	3.48177	6.02642e-27
GOBP_CONNECTIVE_TISSUE_DEVELOPMENT	CDK4;PPARGC1A;OSR2;COL1A1;MAPK14;CSF1;CCN2;CTNNB1;EDN1;EGR1;FGF2;FGF9;SIRT1;GREM1;GLI3;HIF1A;HOXA11;CCN1;IHH;ITGB3;ITGB8;HES5;LEP;LOX;MIR21;SMAD3;MDK;MMP13;NOTCH1;PDGFA;PDGFRB;PIK3CA;PPARG;MAPK3;SULF2;ACTA2;RARB;RB1;RXFP1;SFRP2;BMP4;BMP7;BMPR1B;SNAI2;SNAI1;SOX9;STC1;ZEB1;TGFB1;TGFBI;TGFBR1;THRA;TIMP1;WNT7A;WT1;XBP1;HMGA2;CASR;RUNX1;RUNX3;NCOA1;HYAL2;SERPINH1;HAND2;CD44	4.90128	8.04224e-27
GOBP_NEGATIVE_REGULATION_OF_LEUKOCYTE_CELL_CELL_ADHESION	LILRB2;LILRB1;CTLA4;ERBB2;AKT1;PTPN22;TNFRSF21;GLI3;CD274;TBX21;ANXA1;HLA-DRB1;HLA-G;HMGB1;IHH;IL2;IL2RA;IL4;IL10;IDO1;ARG1;LGALS3;LGALS9;MIR141;MIR181C;MIR21;MIR31;MDK;FOXP3;PPARA;PTEN;BCL6;CCL21;CCL25;SDC4;CXCL12;WNK1;BMP4;CASP3;RUNX1;RUNX3;CD86;CD74	7.56772	8.36627e-27
GOBP_NEGATIVE_REGULATION_OF_INTRACELLULAR_SIGNAL_TRANSDUCTION	PDCD6;CIB1;LRRK2;SIRPA;MAPK14;CSK;ADRA1A;DRD2;AGT;DUSP1;DUSP2;DUSP6;ENO1;EPHB2;EPO;AKT1;ESR1;F2RL1;FBLN1;FOXM1;FOXO1;SIRT1;NUP62;SH3BP4;MTOR;PTPN22;GBA;MSTN;PDCD4;GPER1;CCDC22;GSK3B;GSTP1;HDAC1;HIF1A;HLA-G;APOE;IGF1R;IL1B;ITGB1;STMN1;LIF;LYN;MIR132;MIR145;MIR17;MIR195;MIR20A;MIR200C;MIR204;MIR21;MIR27B;MIR29C;MIR30C2;MIR34A;SMAD4;MDM2;MET;MIF;MMP9;MIR342;MUC1;MYC;ATM;NFE2L2;MIR375;PIK3CB;ERRFI1;T…	3.36343	8.84225e-27
GOBP_MESENCHYME_DEVELOPMENT	PDCD6;YAP1;SEMA3C;COL1A1;CTNNB1;DDX5;EDN1;EDNRA;EPHA3;EZH2;FGF9;FGFR2;FN1;HEY1;MTOR;GATA3;GREM1;GDNF;AMH;PDCD4;GSK3B;HDAC2;HGF;HIF1A;FOXA2;IGF1;RBPJ;IL1B;IL6;MIR21;SMAD2;SMAD3;SMAD4;MDK;MDM2;KITLG;MIR342;MYC;NOS3;NOTCH1;NOTCH4;PAX2;PDGFRB;WNT4;BNC2;MAPK1;MAPK3;PTEN;SEMA6A;ACTA2;BCL2;ROCK1;S100A4;SFRP1;SFRP2;BMP4;BMP7;SNAI2;SNAI1;SOX9;TCF21;TGFB1;TGFB1I1;TGFB2;TGFB3;TGFBR1;TWIST1;WT1;HMGA2;NRP1;WN…	4.51373	8.97982e-27
GOBP_CARBOHYDRATE_METABOLIC_PROCESS	PPARGC1A;MAPK14;EGF;ENO1;AKT1;FOXO1;AKR1B1;SIRT1;MTOR;GALNT3;GALT;GPER1;NR3C1;GSK3B;HAS1;HIF1A;HK1;FOXA2;IFNG;IGF1;IGFBP3;IMPA2;INSR;KCNQ1;LEP;LEPR;LHCGR;ARNT;MIR195;MIR210;MAS1;MECP2;MST1;NFKB1;P2RY6;ENPP1;PIK3CA;PPARA;ST6GALNAC1;PSEN1;PTEN;SLC2A1;SLC2A3;SLC2A4;SRC;BRAF;STAT3;BRS3;TFF3;TGFB1;TNF;TP53;IRS2;HYAL2;ADIPOQ;CHST3;NCOR1	3.24217	1.21064e-26
GOBP_POSITIVE_REGULATION_OF_HEMOPOIESIS	ADA;RASGRP1;LILRB2;CCR1;CREB1;CSF1;IL34;FOXO3;FOS;GATA3;GLI3;ANXA1;HLA-DRB1;HLA-G;HMGB1;ID2;IFNG;IHH;IL2;IL2RA;IL4;IL7;IL7R;IL10;IL12B;IL12RB1;IL15;IL17A;IL18;LGALS1;LGALS3;LGALS9;LIF;MIR145;MIR21;MDK;KITLG;MMP14;MYB;FOXP3;IL23A;PF4;TREM2;PRKCA;AXL;PTPRC;RB1;ACTB;BCL6;CCL19;SMARCC1;BTK;TGFB1;KLF10;TNF;TYROBP;XBP1;DCSTAMP;ARID1A;RUNX1;RUNX3;CD86;CD74	6.30056	1.25091e-26
GOBP_CELL_KILLING	KLRC4-KLRK1;RASGRP1;CD226;LILRB1;CRK;CX3CR1;CD55;DEFB4A;F2;F2RL1;FCGR3A;KLRK1;CADM1;NCR3;HLA-B;HLA-DRB1;HLA-G;HPRT1;ICAM1;IFNG;IL4;IL7R;IL10;IL11;IL12B;IL12RB1;IL13;IL18;ITGAM;KIR2DL4;KIR3DL1;KLRC1;ARG1;LEP;LGALS9;LTF;SH2D1A;NOS2;IL23A;MAPK8;B2M;PTPRC;PVR;IL21;BCL2L1;TGFB2;C3;TYROBP;C9;VAV1;ULBP3;ULBP2	6.18175	1.2692e-26
GOBP_REGULATION_OF_CELL_SUBSTRATE_ADHESION	CDK6;CDKN2A;CIB1;AGR2;OLFM4;CCR7;COL1A1;CRK;CSF1;CCDC80;EPHA3;FBLN1;FGA;FN1;ALOX15;ABI3BP;POLDIP2;GREM1;ANGPT2;GSK3B;CCN1;ILK;ITGA5;ITGB3;KDR;MIR183;TACSTD2;MIR29C;SMAD3;MDK;MMP12;MMP14;NOTCH1;SERPINE1;PIK3CB;PLAU;PLG;WNT4;PTEN;MIR503;RASA1;BCL2;BCL6;ROCK1;CCL21;CCL25;CX3CL1;SDC4;SFRP1;SRC;BRAF;TEK;THBS1;THY1;UTRN;VEGFA;VTN;NDNF;ACTN4;FZD7;SKAP1;NRP1;CD36;SEMA3E;CDC42	5.56809	1.44085e-26
GOBP_REGULATION_OF_ANATOMICAL_STRUCTURE_SIZE	SEMA3C;UTS2;CHRM3;CLCN3;LRRK2;CCR7;ADM;CRABP2;CREB1;CRP;CSF3;ADRA1A;ADRA2B;ACE;DPYSL2;AGT;AGTR1;AGTR2;EDN1;EDNRA;MEGF8;F2R;F2RL1;FGA;FN1;LPAR3;ALOX15;MTOR;LMOD1;GPER1;GSK3B;TMOD3;HCK;APOE;IL7R;AQP1;KNG1;L1CAM;LEP;LIMK1;MIR21;MIR214;MAP2;MMP2;NGF;NOS1;NOS3;OXTR;PAX2;PIK3CA;PTEN;PTGS2;SEMA6A;ACTA2;RASA1;ROCK1;BDNF;CCL11;CCL21;CXCL12;SLC6A4;SOD1;SOD2;SPP1;TACR1;HNF1B;TNF;UCN;VAV1;VEGFA;EZR;WNT7A;CAL…	3.47867	1.59454e-26
GOBP_POSITIVE_REGULATION_OF_GTPASE_ACTIVITY	RASGRP1;CXCL13;CCR7;CRK;DOCK11;S1PR1;ERBB2;EZH2;F2R;F2RL1;GSK3B;ITGB1;USP17L2;RHOG;NTF3;NTRK3;WNT4;RASA1;RGS4;CCL1;CCL2;CCL5;CCL11;CCL14;CCL16;CCL17;CCL19;CCL21;CCL22;CCL25;CX3CL1;SFRP1;THY1;VAV1;BCAR3;RGS6	4.78076	1.60038e-26
GOBP_POSITIVE_REGULATION_OF_PRODUCTION_OF_MOLECULAR_MEDIATOR_OF_IMMUNE_RESPONSE	NOD1;CD226;LILRB1;PHB2;CD55;EPHB2;F2RL1;SIRT1;PTPN22;GATA3;TBX21;HK1;HLA-G;IL1B;IL1R1;IL2;IL4;IL6;IL10;IL13;IL17A;IL18;KIR2DL4;MIF;MLH1;MSH2;B2M;PTPRC;IL21;STAT6;BTK;TGFB1;TLR3;TLR4;XBP1;IL18R1;BCL10;IL33;CD86;CD36;CD74	8.03186	1.65552e-26
GOBP_NEGATIVE_REGULATION_OF_LOCOMOTION	ADA;MIR543;KLRC4-KLRK1;SEMA3C;CXCL13;CD200R1;CLDN3;CRK;CX3CR1;CYP1B1;CYP19A1;DCN;DPP4;DRD2;DUSP1;AGTR2;AIF1;AKT1;FBLN1;FGF2;KLRK1;FOXO3;PLCB1;GATA3;GREM1;GJA1;GNRH1;ANGPT2;HAS1;HDAC1;HDAC2;HMGB1;APEX1;APOE;IGFBP3;IL4;MIR126;MIR132;MIR145;MIR20A;MIR200B;MIR200C;MIR204;MIR21;MIR214;TACSTD2;MIR22;MIR29C;MIR30C2;MIR34A;MECP2;MIF;CD200;NFE2L2;NGFR;NOTCH1;SERPINE1;SERPINF1;WNT4;DLL4;PPARG;PTEN;PTGER4;M…	3.82723	1.75657e-26
GOBP_MEMBRANE_ORGANIZATION	PDCD6;BCL2L11;DNM1L;KIF20A;NDRG1;CETP;PRRT2;CLCN3;ANO4;DPP4;EGFR;AIF1;EPHB2;AKT1;F2RL1;ALOX15;GATA2;GDNF;GPER1;GSK3B;ANXA1;ANXA2;HSPA4;APOA2;APOE;FASLG;AR;ITGA2;ITGAM;RHOG;LMNB1;MIR17;MIR29C;PLK1;TREM2;PPT1;PRKCA;PRKCB;VPS11;MAPK8;PTEN;PTPRC;PTPRD;BAX;BCL2;BCL2L1;SLC2A4;SOD1;STAR;STX5;SYP;SYT1;TGFB2;THBS1;TSPO;TP53;C3;CXCR4;BAG6;DCSTAMP;BECN1;HYAL2;CD36;CDC42	2.73763	2.17161e-26
GOBP_CELL_CELL_SIGNALING_BY_WNT	CDH3;YAP1;CTHRC1;LRRK2;COL1A1;MAPK14;CTNNB1;DLX3;DLX5;DRD2;EDN1;EDNRA;EGF;EGFR;EGR1;FGF2;FGF9;FGFR2;DKK1;FOXO1;FOXO3;GATA3;GREM1;RBMS3;GLI1;GLI3;GSK3B;HDAC1;APOE;IGFBP1;IGFBP6;RBPJ;ILK;MIR145;MIR29C;SMAD3;MDK;NFKB1;NOTCH1;OPRM1;WNT4;PPP2R1A;SULF2;PSEN1;PTEN;CCND1;SDC1;SFRP1;SFRP2;WNK1;SNAI2;SOX2;SOX9;SRC;HNF1B;TERT;TGFB1;TGFB1I1;TLR2;WNT7A;AXIN1;FZD7;LGR5;WNT3A;CCNE1;CDC42	3.64973	2.22623e-26
GOBP_MACROMOLECULE_CATABOLIC_PROCESS	MIR543;TOB1;CDKN1B;CEBPA;HPSE;LRRK2;CPB2;MAPK14;CTNNB1;DDX5;EGF;EGFR;ELAVL1;AKT1;FEN1;FGF2;ZHX2;FOXO1;NEDD4L;DICER1;SIRT1;MTOR;RNF19A;GBA;GDNF;ANG;CCDC22;MYLIP;GSK3B;TBX21;ANXA2;APEX1;BIRC2;IFI27;IFNG;APOE;IL1B;IL6;IL10;EIF3E;ISG20;USP17L2;SMAD3;SMAD4;MDM2;MLH1;MME;MMP2;MMP12;ATM;NFE2L2;NOS2;NOTCH1;YBX1;PAPPA;HERC5;PLK1;TREM2;PPT1;PRKCA;VPS11;PSEN1;PSMD2;PSMD9;PSMD10;PTEN;BAX;RELA;RNASE3;ROCK1;SK…	2.31579	2.33146e-26
GOBP_REGULATION_OF_NEURON_PROJECTION_DEVELOPMENT	UST;PLXNC1;CARM1;SEMA3C;CIB1;PDLIM5;CFL1;LRRK2;CNR1;CRABP2;CRK;CRMP1;AGT;MEGF8;EPHA3;EPHB2;EPO;AKT1;EZH2;FKBP4;DKK1;PLXND1;NEDD4L;FN1;LPAR3;GATA3;MYLIP;GSK3B;HDAC2;HGF;APOE;IGF1R;L1CAM;LIMK1;LYN;MIR200C;MIR210;MAP2;MDK;NFE2L2;NGF;NTRK2;NTRK3;PAK1;SERPINF1;MAP2K1;PSEN1;B2M;PTEN;SEMA6A;PTN;PTPRD;BDNF;CX3CL1;CXCL12;SFRP1;SFRP2;GORASP1;BMP7;SPP1;BRAF;THY1;VEGFA;VIM;WNT7A;NDNF;NRP1;WNT3A;SLIT2;SEMA3E;…	3.69369	2.58657e-26
GOBP_POSITIVE_REGULATION_OF_PEPTIDYL_TYROSINE_PHOSPHORYLATION	CSF1R;CSF2;CSF3;IL34;ADRA1A;ACE;AGT;HBEGF;EGF;EGFR;EPO;ERCC6;MTOR;GREM1;GH1;ANGPT1;HDAC2;HGF;IFNG;IGF1;IL2;IL4;IL6;IL11;IL12B;IL13;IL15;IL18;ITGA5;ITGB3;AREG;HES5;LEP;LIF;LYN;KITLG;MIF;NTF3;IL23A;TREM2;PTPRC;IL21;CCL5;SRC;ADAM17;TDGF1;TGFB1;TNF;TNFRSF1A;TP53;VEGFA;VTN;TSLP;NRP1;WNT3A;ADIPOQ;CD36;CD44;CD74	6.08101	2.62897e-26
GOBP_ORGANOPHOSPHATE_METABOLIC_PROCESS	ADA;DNM1L;MTCO2P12;CETP;PPARGC1A;SMPDL3A;PHB2;LRRK2;PARP1;CSF1R;ENO1;FGF2;PLCB1;FMO2;ALOX15;MTOR;GATA6;GPER1;GPX4;HIF1A;HK1;ACACA;HPRT1;APOA2;IFNG;IGF1;IL4;IMPA2;IDO1;INSR;LHCGR;LIPC;ARNT;MIR30C1;MAS1;MECP2;ATM;NME1;NOS1;NOS2;NOS3;NT5E;OGG1;P2RY6;PDGFA;PDGFRB;ENPP1;ENPP3;PIK3CA;PIK3CB;PIK3CD;PIK3CG;PLA2G2A;TREM2;PON1;PPARA;PPT1;PSEN1;PTEN;STAT3;SULT1E1;SULT1A1;SULT2A1;TGFB1;TSPO;TP53;CARD11;BECN1…	2.56382	2.70375e-26
GOBP_ANION_TRANSPORT	ABCC9;ABCC4;CFTR;CLCN3;ANO4;SLCO6A1;CLDN4;ACE;AKR1C1;DRD2;AGT;EDN1;SLC7A8;GJA1;ANXA1;IL1A;IL1B;AQP9;ITGB1;KCNQ1;ARG1;LEP;LHCGR;MIR33A;MIF;NOS2;NTRK2;P2RY6;ENPP1;ENPP3;PLA2G2A;SLC52A1;ANKH;PSEN1;PTGS2;RGS4;SLC1A1;SLC2A1;SLC2A3;SLC20A1;SSTR4;STC1;TSPO;TNF;TRH;TRPV1;CA2;SLC38A1;NR0B2;CASR;SLC16A6;SLC33A1;SFXN1;CD36;PTGES;CD47	3.45144	2.82675e-26
GOBP_SENSORY_SYSTEM_DEVELOPMENT	CDKN1B;OSR2;CTNNB1;CYP1A1;CYP1B1;DRD2;EGFR;EPHB2;FBN1;FGF2;FGF9;ZHX2;FLT1;FJX1;NECTIN3;GATA3;GLI3;HDAC1;HDAC2;HIF1A;IHH;FASLG;AQP1;AQP5;INHBA;ITGAM;JUN;KDR;HES5;SMAD3;NHS;NOTCH1;NTRK2;PAX2;PDGFRA;PDGFRB;SERPINF1;DLL4;MED1;PSEN1;BAX;NECTIN1;RARB;BCL2;RORB;SLC1A1;BMP4;BMP7;BMPR1B;SOX2;SOX9;STAT3;ZEB1;TGFB2;TGFBR1;THY1;C3;TWIST1;VEGFA;VIM;WNT7A;WT1;BCAR3;NRP1;PROM1;ACVR2B;GDF3	3.90009	4.06822e-26
GOBP_REGULATION_OF_WOUND_HEALING	HPSE;CPB2;CLDN4;CLDN3;CRK;HBEGF;EDN1;EPHB2;F2;F2R;F2RL1;F3;FGA;FGF2;MTOR;ANXA1;ANXA2;FOXA2;APOE;ITGB1;KNG1;MIR200B;MIR34A;SMAD3;NFE2L2;NOS3;SERPINE1;SERPINB2;PDGFA;PDGFRA;PLAU;PLG;WNT4;PTEN;MIR451A;ACTA2;SMOC2;THBS1;SERPING1;TNF;VTN;XBP1;CXCR4;CLDN1;CD36	7.82814	4.19936e-26
GOBP_RESPONSE_TO_STEROID_HORMONE	BCL2L11;YAP1;CARM1;TXNIP;PHB2;UCN3;COL1A1;ADM;CLDN4;PARP1;CCN2;CYP1B1;ACE;DDX5;EDN1;AIF1;EPO;ESR1;ESR2;ESRRB;FKBP4;FOXO3;SIRT1;FOS;GBA;MSTN;GHRHR;GJB2;FOXP1;GNRH1;GPER1;NR3C1;ANXA1;HDAC1;HSD3B1;HSD3B2;HSD11B2;APOA2;IGF1R;IGFBP7;IL1RN;IL6;AQP1;IL10;AR;AREG;ARG1;LOX;MAOB;MDK;NR3C2;NOTCH1;NTRK3;OXTR;PAK1;IL22;PAPPA;PCNA;SERPINF1;PGR;PIK3CA;ERRFI1;PPARA;UGT1A1;MED1;TRERF1;VPS11;PTGER2;PTGS2;CCND1;BCL…	4.25638	4.63418e-26
GOBP_POSITIVE_REGULATION_OF_MONONUCLEAR_CELL_MIGRATION	CXCL13;CCR1;CCR7;CSF1;CX3CR1;AIF1;FPR2;HMGB1;IL4;CXCL10;ITGB3;LGALS3;LGALS9;SERPINE1;CCL1;CCL5;CCL21;CXCL12;WNK1;ADAM17;TNF;CCR2;CD47	14.4007	5.44254e-26
GOBP_INTERLEUKIN_12_PRODUCTION	LILRB1;CCR7;MAPK14;PLCB1;FOXP1;HLA-B;HLA-G;HMGB1;HSPD1;IFNG;IL10;IL12B;IL16;IL17A;IDO1;LEP;LGALS9;MIR21;MDK;NFKB1;IL23A;RELA;CCL19;THBS1;TLR2;TLR3;TLR4;CD36;CD40LG;CD47	17.2559	6.42033e-26
GOBP_TISSUE_MIGRATION	PDCD6;CIB1;CXCL13;MAPK14;CYP1B1;DCN;DPP4;AGT;HBEGF;AGTR2;EDN1;EGF;EPHB4;AKT1;ETS1;FGF1;FGF2;PLXND1;SIRT1;CAPN7;MTOR;GATA2;GATA3;GREM1;FOXP1;ANGPT1;ANGPT2;ANXA1;HIF1A;HMGB1;NR4A1;IFNG;APOE;IL4;ITGA2;ITGB1;ITGB3;JUN;KDR;MIR10B;MIR126;MIR132;MIR143;MIR20A;MIR200A;MIR200B;MIR200C;MIR204;MIR21;MIR210;TACSTD2;MIR22;MIR27B;MIR29C;MIR30A;MIR31;MECP2;MET;KITLG;MMP9;MIR135B;MIR342;NFE2L2;NOS3;NOTCH1;SERPIN…	3.99776	7.25554e-26
GOBP_REGULATION_OF_ENDOCYTOSIS	LILRB1;LRRK2;DRD2;EGF;EPHA3;F2RL1;DKK1;NEDD4L;ALOX15;GATA2;GREM1;GH1;ANGPT1;ANXA2;APOE;IL4;INSR;ITGA2;ITGAV;ITGB3;LGALS3;MIR17;MIR205;MIR27B;NTF3;SERPINE1;PIK3CB;TREM2;PPT1;AXL;PSEN1;B2M;ROCK1;CCL19;CCL21;SELE;SRC;C3;VEGFA;VTN;WNT3A;CD14;ADIPOQ;CD36;CDC42	5.61398	9.35902e-26
GOBP_PROTEIN_CATABOLIC_PROCESS	CDKN1B;CEBPA;HPSE;LRRK2;CPB2;CTNNB1;EGF;EGFR;AKT1;FOXO1;NEDD4L;SIRT1;MTOR;RNF19A;GBA;CCDC22;MYLIP;GSK3B;TBX21;ANXA2;BIRC2;IFI27;IFNG;APOE;IL1B;IL10;USP17L2;SMAD3;SMAD4;MDM2;MME;MMP2;MMP12;ATM;NFE2L2;NOS2;NOTCH1;PAPPA;HERC5;PLK1;TREM2;PPT1;VPS11;PSEN1;PSMD2;PSMD9;PSMD10;PTEN;RELA;ROCK1;SKP2;SMARCC1;SOX9;STX5;BTK;TGFB1I1;TIMP1;TIMP2;TIMP3;TIMP4;TNF;TNFRSF1B;UCHL1;EZR;VIP;XBP1;BAG6;RNF34;AXIN1;CASP3…	2.55902	9.92067e-26
GOBP_SIGNAL_RELEASE	ABCC4;CFTR;LILRB1;PRRT2;UCN3;LRRK2;CNR1;ADM;CREB1;CRH;CRHR1;ADRA1A;ADRA2B;CYP19A1;DRD2;AGT;AGTR1;EDN1;F2R;F2RL1;FGA;FOXO1;GATA3;GDNF;GHRH;GHRHR;GJA1;GNRHR;GPER1;GSK3B;ANXA1;HIF1A;HLA-DRB1;NR4A1;FOXA2;IFNG;IL1A;IL1B;IL1RN;IL6;AQP1;IL11;INHA;INHBA;KCNQ1;KISS1;LEP;LIF;LYN;MIR17;SMAD2;SMAD4;MAOB;MIF;NOS2;OPRM1;OXTR;PPARG;PPT1;PRKCB;PSEN1;RETN;PSMD9;PTGS2;RAF1;REN;CCL5;CXCL12;SFRP1;SLC6A4;SNCG;SPP1;BR…	3.54621	1.01454e-25
GOBP_INORGANIC_ION_TRANSMEMBRANE_TRANSPORT	ABCB6;ABCC9;MTCO2P12;CFTR;SCN11A;PHB2;CLCN3;ANO4;CCR5;CCR7;CLDN4;CRHR1;ADRA1A;CCN2;CYB5A;DPP6;DRD2;EDN1;EDNRA;EPO;F2;F2R;FGF2;NEDD4L;GPER1;REM1;GSTM2;SLC40A1;ANXA2;IFNG;FASLG;AQP1;IL13;CXCL10;ITGAV;ITGB1;ITGB3;KCNQ1;KCNQ2;LHCGR;LYN;MIR200C;MIR21;MIR210;CXCL9;NOS1;OPRM1;P2RX3;P2RX5;P2RY6;PIK3CG;TREM2;ANKH;PSEN1;PTPRC;BAX;BCL2;RGS4;CCL19;CCL21;CX3CL1;SLC1A1;WNK1;SLC6A4;SLC20A1;THY1;TRPC6;TWIST1;UTR…	2.63892	1.14459e-25
GOBP_T_CELL_MEDIATED_IMMUNITY	LILRB1;CD55;AHR;CADM1;GATA3;TBX21;HLA-B;HLA-DRB1;HLA-G;HMGB1;HPRT1;HSPD1;ICAM1;IL1B;IL1R1;IL4;IL6;IL7R;IL12B;IL12RB1;IL18;KLRC1;ARG1;FOXP3;IL23A;B2M;PTPRC;PVR;TNFRSF1B;CCR2;ZP3;IL18R1	9.07869	1.18602e-25
GOBP_POSITIVE_REGULATION_OF_CELLULAR_COMPONENT_BIOGENESIS	BCL2L11;CDKN1B;CXCL13;CCR7;CLDN3;DOCK11;CSF2;CSF3;CCN2;DNMT1;AGT;EPHB2;ERCC1;ESR1;F2RL1;NUP62;ALOX15;MTOR;LMOD1;POLDIP2;MSTN;GSK3B;HCK;IFNG;IL1RAP;IL17A;KDR;RHOC;LGALS3;LIMK1;SMAD3;MECP2;MET;MMP1;MMP3;ATM;NTRK2;OXTR;PAK1;PIK3CA;WNT4;PRKCA;PTPRD;BAX;ROCK1;BDNF;CCL11;CCL19;CCL21;CX3CL1;SDC1;SDC4;SFRP1;BMP7;FSCN1;SOX9;SRC;BRAF;TACR1;TEK;TERF1;TGFB1;TGFB3;TGFBR1;THY1;TLR4;CLDN5;TNF;TP53;VEGFA;WNT7A;S…	3.44607	1.21478e-25
GOBP_NEGATIVE_REGULATION_OF_TRANSPORT	ADA;LILRB2;LILRB1;PRRT2;LRRK2;CNR1;CRH;CRHR1;SIRPA;CSK;ADRA2B;ACE;DRD2;EDN1;EGF;EPHA3;EPHB2;EPO;AKT1;F2R;FOXO1;NEDD4L;GJA1;ANGPT1;REM1;GSTM2;ANXA1;ANXA2;HMGB1;APOA2;APOE;IL1B;IL11;IL12B;INHA;INHBA;ITGAV;ITGB3;USP17L2;LEP;LGALS3;LGALS9;LIF;MIR143;MIR148A;MIR17;MIR200C;MIR205;MIR27B;MIR30C1;MIR33A;MIR34A;MAOB;MMP9;CD200;NFKB1;NOS1;NOS3;NOTCH1;OPRM1;OXTR;ENPP1;PRKCB;PSEN1;PSMD9;PTEN;PTGS2;MIR451A;BC…	3.49796	1.65456e-25
GOBP_REGULATION_OF_GTPASE_ACTIVITY	KLRC4-KLRK1;RASGRP1;PLXNC1;CXCL13;LRRK2;CCR7;CRK;DOCK11;S1PR1;EPHA3;ERBB2;EZH2;F2R;F2RL1;KLRK1;PLXND1;SH3BP4;MTOR;POLDIP2;GSK3B;ITGB1;USP17L2;RHOG;STMN1;MIR21;MET;NTF3;NTRK2;NTRK3;WNT4;FGD6;RASA1;RGS4;BCL6;CCL1;CCL2;CCL5;CCL11;CCL14;CCL16;CCL17;CCL19;CCL21;CCL22;CCL25;CX3CL1;SFRP1;WNK1;SOD1;THY1;VAV1;BCAR3;RGS6	3.95657	2.31743e-25
GOBP_TRANSMEMBRANE_RECEPTOR_PROTEIN_SERINE_THREONINE_KINASE_SIGNALING_PATHWAY	TOB1;FST;PARP1;MAPK14;DDX5;DLX3;DLX5;MEGF8;EGR1;FBN1;FGF9;DKK1;SIRT1;FOS;FSHB;GATA6;GREM1;MSTN;AMH;AMHR2;PDCD4;HDAC1;HDAC2;HOXA13;HPGD;CCN1;RBPJ;ILK;INHA;INHBA;ITGB1;ITGB8;JUN;KDR;HES5;LOX;MIR17;MIR183;MIR20A;MIR21;MIR30A;SMAD2;SMAD3;SMAD4;MIR342;NOTCH1;PPARA;PPARG;MAPK3;HTRA1;SFRP1;SFRP2;BMP4;BMP7;BMPR1B;SRC;STAT3;ADAM17;ZEB1;TDGF1;TGFB1;TGFB1I1;TGFB2;TGFB3;LEFTY2;TGFBR1;THBS1;CLDN5;TP53;VIM;TET…	3.85105	2.57496e-25
GOBP_EMBRYONIC_ORGAN_DEVELOPMENT	ADA;TSHZ1;YAP1;CEBPA;CTHRC1;OSR2;ADM;CSF2;CTNNB1;DLX5;EDN1;EDNRA;MEGF8;EGFR;EPHB2;ERCC1;AKT1;ESRRB;FBN1;FGF9;FGFR2;HEY1;GATA2;GATA3;GDNF;GLI1;GLI3;HIF1A;HOXA11;HOXB4;ID2;CCN1;RBPJ;IHH;CXCL8;IL10;KCNQ1;KDR;LIF;ARNT;SMAD2;SMAD3;KITLG;MMP14;NOTCH1;PAX2;PDGFA;PDGFRA;PLG;POLE;MED1;MAPK1;MAPK3;MAP2K1;PSEN1;RARB;RARRES2;BMP4;BMP7;SNAI1;SOD1;SOX9;SOX15;HNF1B;ZEB1;TCF21;NR2F2;TGFB1;TGFB2;TGFB3;TGFBR1;TNF;…	3.59485	2.62784e-25
GOBP_CALCIUM_ION_HOMEOSTASIS	CCR1;CCR5;CCR7;ADM;DRD2;EDN1;EDNRA;F2;F2R;FGF2;GPER1;GSTM2;APOE;FASLG;IL13;CXCL10;ITGB3;KDR;LHCGR;LYN;CXCL9;NOS1;NT5E;P2RY6;PIK3CB;RMDN3;PRKCB;ANKH;PSEN1;PTPRC;BAX;BCL2;CCL1;CCL5;CCL11;CCL14;CCL19;CCL21;CX3CL1;CXCL12;STC1;THY1;TPT1;TRPC6;CCR2;VDR;TRPV1;CALCA;CASR;STC2;CD19	4.38457	2.87538e-25
GOBP_REPRODUCTIVE_SYSTEM_DEVELOPMENT	BCL2L11;CDKN1B;FST;ZFP42;CTNNB1;CYP1B1;CYP19A1;ACE;ERCC1;ESR1;FGF9;FGFR2;FKBP4;FOXO3;SIRT1;FSHB;FSHR;NR5A1;GATA3;GATA6;AMH;AMHR2;GLI1;GLI3;GNRH1;ANG;ANXA1;HOXA10;HOXA11;HOXA13;HSD17B3;TNC;IL1A;INHA;INHBA;INSR;AR;KDR;LEP;LHB;LHCGR;SMAD4;MAS1;KITLG;MMP2;MMP14;MSH2;ATM;NOS3;NOTCH1;PDGFA;PDGFRA;PDGFRB;SERPINF1;PGR;WNT4;AXL;PRLR;RETN;PTEN;BAX;CCND1;BCL2;REN;BCL2L1;SDC1;SFRP1;SFRP2;BMP4;BMP7;BMPR1B;SLI…	4.38457	2.87538e-25
GOBP_REGULATION_OF_ALPHA_BETA_T_CELL_ACTIVATION	ADA;LILRB1;CD55;IL27;PTPN22;GATA3;GLI3;CD274;TBX21;ANXA1;HLA-DRB1;HMGB1;IFNG;IHH;IL2;IL2RA;IL4;IL12B;IL12RB1;IL18;LGALS9;MIR21;MYB;FOXP3;IL23A;PTPRC;BCL6;CCL19;CCR2;TYK2;CARD11;RUNX1;RUNX3;CD86	8.79004	3.33992e-25
GOBP_T_CELL_MIGRATION	CXCL13;CD200R1;CRK;S1PR1;AIF1;ICAM1;CXCL10;ITGB3;CD200;PIK3CD;PIK3CG;CXCL16;CCL2;CCL5;CCL21;CXCL12;WNK1;ADAM17;CCR2	14.054	3.64733e-25
GOBP_RESPONSE_TO_ALCOHOL	CDK4;CFTR;UCN3;CCR5;CCR7;CNR1;CLDN3;CLDN7;CREB1;CRHR1;PARP1;CSF3;CTNNB1;CYP1B1;ACE;AKR1C2;DNMT3A;DRD2;AHR;AKT1;FGFR2;FOXO3;FOS;GATA3;MSTN;GNRH1;HDAC2;ACACA;HPGD;HSD3B1;HSD3B2;BIRC2;IGF1R;IGFBP7;IL2;IL13;INHBA;LEP;SMAD2;MAOB;MIR342;NTRK3;OGG1;OPRM1;P2RY6;FOXP3;PPARA;UGT1A1;PTGER2;PTGER4;PTGFR;CCND1;BCL2L1;RGS4;CCL19;CCL21;SFRP1;SLC2A4;SLIT3;SOD1;SOD2;BRCA1;TACR1;KLF9;TGFB1;TGFBR1;TSPO;CLDN5;TNF;VC…	4.91989	3.66599e-25
GOBP_CELL_SURFACE_RECEPTOR_SIGNALING_PATHWAY_INVOLVED_IN_CELL_CELL_SIGNALING	CDH3;YAP1;CTHRC1;LRRK2;COL1A1;MAPK14;CTNNB1;DLX3;DLX5;DRD2;EDN1;EDNRA;EGF;EGFR;EGR1;AKT1;FGF2;FGF9;FGFR2;DKK1;FOXO1;FOXO3;GATA3;GREM1;RBMS3;GLI1;GLI3;GSK3B;HDAC1;APOE;IGFBP1;IGFBP6;RBPJ;ILK;ITGAM;MIR145;MIR29C;SMAD3;MDK;MECP2;NFKB1;NOTCH1;OPRM1;P2RX3;P2RX5;WNT4;PPP2R1A;SULF2;PSEN1;PTEN;CCND1;RGS4;SDC1;SFRP1;SFRP2;WNK1;BMP4;SNAI2;SOX2;SOX9;SRC;HNF1B;TERT;TGFB1;TGFB1I1;TLR2;C3;TRPV1;WNT7A;AXIN1;FZD…	3.16162	6.35594e-25
GOBP_RECEPTOR_MEDIATED_ENDOCYTOSIS	LILRB1;ADM;DPP4;DRD2;EGF;DKK1;GREM1;GH1;ANGPT1;ANXA2;APOE;IL4;CXCL8;CXCR1;CXCR2;INSR;ITGAM;ITGAV;ITGB1;ITGB3;MIR17;MIR205;MIR27B;MRC1;NTF3;SERPINE1;PIK3CB;PPT1;PSEN1;B2M;ACKR3;CXCL16;SAG;CCL19;CCL21;SDC1;SELE;C3;VEGFA;EZR;VTN;WNT3A;CD14;ADIPOQ;CD36	4.78922	7.34037e-25
GOBP_LEUKOCYTE_HOMEOSTASIS	ADA;BCL2L11;DOCK11;CSF1;AKT1;F2R;SLC40A1;ANXA1;HIF1A;HMGB1;FAS;IL2;IL2RA;IL6;IL7R;CXCR2;LGALS9;LYN;KITLG;MIF;FOXP3;PIK3CB;PIK3CD;AXL;BAX;BCL2;ADAM17;BTK;CASP3;BCL10;CD74	9.8224	8.29087e-25
GOBP_POSITIVE_REGULATION_OF_RESPONSE_TO_BIOTIC_STIMULUS	KLRC4-KLRK1;RASGRP1;CD226;F2RL1;KLRK1;FPR2;CADM1;NCR3;CD274;HCK;HLA-DRB1;HLA-G;HMGB1;HSPD1;IL12B;IL17A;USP17L2;KIR2DL4;ARG1;LYN;SH2D1A;MBL2;MIF;MMP12;PAK1;MED1;PRKCA;PVR;IL21;CCL5;SRC;TLR4;TYROBP;VAV1;NLRC5;CD14	5.91218	9.76909e-25
GOBP_GLIOGENESIS	CDK6;NDRG1;MMP24;CSF1;CSF1R;CSK;IL34;CTNNB1;CX3CR1;ERBB2;ERCC2;AKT1;EZH2;F2;FGF2;DICER1;MTOR;GBA;TNFRSF21;GLI3;ANXA1;HDAC1;HDAC2;ID2;IFNG;IFNGR1;IL1B;IL6;ILK;AREG;KRAS;HES5;LAMB1;LEPR;LIF;LTA;LYN;MIR142;MIR181C;MDK;MECP2;MMP14;NOTCH1;NTRK2;NTRK3;PAX2;TREM2;MAPK1;MAPK3;MAP2K1;PSEN1;PTEN;PTN;RB1;CCL2;CX3CL1;SOD1;SOX2;SOX9;STAT3;TGFB1;TGFB2;TSPO;TLR2;TLR4;TNF;TNFRSF1B;TP53;CCR2;VEGFC;VIM;VTN;CXCR4;I…	4.33471	9.81173e-25
GOBP_HORMONE_METABOLIC_PROCESS	ADM;CRABP2;CYP1A1;CYP1A2;CYP1B1;CYP3A4;CYP11A1;CYP17A1;CYP19A1;CYP26A1;ACE;AKR1C1;AKR1C2;DIO2;DPP4;EGR1;ESR1;AKR1B1;FSHB;NR5A1;GATA3;GHRHR;NR3C1;HIF1A;HSD3B1;HSD3B2;HSD17B1;HSD17B3;HSD17B2;IGF1R;LEP;LHB;LHCGR;LIPE;ARNT;MME;NFKB1;HSD17B7;PDGFRA;WNT4;UGT2B28;UGT1A1;MED1;RBP1;REN;SPP1;SRD5A1;SRD5A2;SULT1E1;SULT1A1;SULT2A1;TSPO;PAX8;DHRS11;STC2;AKR1C3	5.02131	1.0254e-24
GOBP_ORGANIC_ACID_BIOSYNTHETIC_PROCESS	CRABP2;CTH;CYP1A1;CYP1A2;CYP3A4;EDN1;SIRT1;ALOX15;GATM;HPGDS;GPX4;GSTM1;GSTM2;GSTP1;ANXA1;ACACA;IL1B;IDO1;LIPC;MIR132;MIR204;MIR30C1;MIR33A;MIF;PTGS2;RBP1;SRR;BRCA1;STAR;XBP1;SLC38A1;AKR1C3;LIPG;TECR;PTGES;CD74	4.19675	1.04367e-24
GOBP_STRIATED_MUSCLE_TISSUE_DEVELOPMENT	YAP1;SEMA3C;PDLIM5;AKAP13;CREB1;MAPK14;ADRA1A;AGT;S1PR1;EDN1;EDNRA;FGF2;FGF9;FGFR2;DKK1;HEY1;MTOR;GATA6;GREM1;GJA1;ANKRD1;FOXP1;GLI1;ID2;IGF1;RBPJ;ITGB1;LOX;MIR195;MIR200B;MIR204;SMAD3;SMAD4;NOTCH1;PDGFRA;PDGFRB;DLL4;PPARA;MED1;PTEN;RARB;RGS4;BMP4;BMP7;SOX15;TGFB1;TGFB2;TGFBR1;TWIST1;VEGFA;WT1;FZD7;RUNX1;WNT3A;CDK1;CDC42	4.80887	1.1505e-24
GOBP_POSITIVE_REGULATION_OF_INFLAMMATORY_RESPONSE	CEBPA;LRRK2;CCR7;CNR1;ACE;AGT;AGTR1;ETS1;PDCD4;IFNG;IL1B;IL2;IL6;IL12B;IL15;IL16;IL18;IDO1;ITGA2;LGALS1;LTA;MIR126;MIR142;MIR21;MIR22;MDK;NFKBIA;NINJ1;SERPINE1;IL23A;PIK3CG;PLA2G2A;TREM2;PTGER4;PTGS2;IL21;CCL1;CX3CL1;BTK;TLR2;TLR3;TLR4;TNF;TNFRSF1A;C3;CCR2;ZP3;TSLP;HYAL2;IL33;CLOCK;CD47	6.80836	1.17818e-24
GOBP_CELLULAR_RESPONSE_TO_CHEMICAL_STRESS	PPARGC1A;CHUK;LRRK2;SIRPA;PARP1;CTNNB1;CYP1B1;DAPK1;EDN1;EDNRA;EGFR;AIF1;EPO;AKT1;EZH2;FANCD2;FOXO1;FOXO3;AKR1B1;SIRT1;FOS;MTOR;GBA;GJB2;FOXP1;ANXA1;HDAC2;HGF;HIF1A;APEX1;FAS;IL6;AQP1;IL10;AQP5;JUN;ARG1;ARNT;MIRLET7B;MIR132;MIR17;MIR195;MIR21;MIR34A;MET;MMP2;MMP3;MMP9;MPO;ATM;NFE2L2;NOS3;PAX2;PCNA;PDGFRA;PIK3CA;ERRFI1;TREM2;AXL;MAPK1;MAPK3;MAPK8;PTGS2;BCL2;RELA;SLC1A1;SLC2A1;SLC2A4;BMP7;SOD1;SOD2…	4.05915	1.31372e-24
GOBP_STRESS_ACTIVATED_PROTEIN_KINASE_SIGNALING_CASCADE	RASGRP1;NOD1;LRRK2;CCR7;CRK;SIRPA;MAPK14;CCN2;AGT;DUSP1;EGFR;ERCC6;F2RL1;FOXM1;FOXO1;PLCB1;PTPN22;GREM1;PDCD4;GSTP1;HGF;HMGB1;IGF1R;IGFBP6;FAS;IL1A;IL1B;LEP;LGALS9;LYN;MIR20A;SMAD3;MYC;NFKB1;TREM2;MAPK1;MAPK3;MAPK8;MAP2K1;MAP2K7;PTGER4;CCL19;CCL21;SFRP1;SFRP2;BMP4;TGFB2;TLR3;TLR4;TNF;VEGFA;EZR;WNT7A;ZFP36;AXIN1;FZD7;CASR;HDAC3;HAND2;NCOR1;RASSF2	4.9076	1.58672e-24
GOBP_POSITIVE_REGULATION_OF_DNA_BINDING_TRANSCRIPTION_FACTOR_ACTIVITY	NOD1;CIB1;PPARGC1A;PHB2;CHUK;CSF3;CTH;CTNNB1;CX3CR1;AGT;EDN1;AKT1;ESR1;ESR2;GREM1;AMH;IL1B;IL1RAP;IL6;IL10;IL18;AR;LGALS9;LTF;SMAD3;CD200;PPARG;PRKCB;PTEN;RELA;CX3CL1;STAT3;TCF3;BTK;TFDP1;TLR2;TLR3;TLR4;TNF;VEGFA;CARD11;CAT;IL18R1;BCL10;WNT3A;CD36;CLOCK;CD40LG	4.68522	2.22946e-24
GOBP_RESPONSE_TO_OXIDATIVE_STRESS	TXNIP;PPARGC1A;CHUK;LRRK2;COL1A1;CRK;SIRPA;PARP1;CTNNB1;CYP1B1;DAPK1;EDN1;EDNRA;EGFR;AIF1;ERCC1;ERCC2;AKT1;ERCC6;EZH2;FANCD2;FOXO1;FOXO3;SIRT1;FOS;GBA;GJB2;FOXP1;GPX3;GPX4;GSTP1;ANXA1;HDAC2;HGF;HIF1A;HP;APEX1;APOE;IL1A;IL6;AQP1;IL10;JUN;AREG;ARG1;ARNT;MIRLET7B;MIR132;MIR17;MIR195;MIR21;MIR34A;MBL2;MET;MMP2;MMP3;MMP9;MMP14;MPO;NFE2L2;NOS3;OGG1;PAX2;PCNA;PDGFRA;PDGFRB;TREM2;AXL;MAPK1;MAPK3;MAPK8;PS…	3.58132	2.23933e-24
GOBP_POSITIVE_REGULATION_OF_ORGANELLE_ORGANIZATION	BCL2L11;DNM1L;CDKN1B;PPARGC1A;PRRT2;CCR7;CSF2;CSF3;CCN2;CTNNB1;DCN;DNMT1;EDN1;EGF;ERCC1;F2RL1;FEN1;PLCB1;NUP62;ALOX15;MTOR;LMOD1;GPER1;GSK3B;ANXA1;ANXA2;HCK;HIF1A;HOXA13;IGF1;IL1A;IL1B;INSR;KDR;RHOC;LIMK1;SMAD3;MECP2;MET;MMP9;ATM;NTF3;NTRK3;PAK1;PDGFRB;TREM2;WNT4;MAPK1;MAPK3;MAPK8;MAP2K7;BAX;RB1;CCL11;CCL21;CX3CL1;SDC1;SDC4;SFRP1;FSCN1;SRC;BRAF;SYT1;TACR1;TEK;TERF1;TGFB3;TGFBR1;TNF;TP53;BECN1;TNF…	3.31911	2.6366e-24
GOBP_ORGANIC_ACID_TRANSPORT	ABCC4;CRABP2;ACE;AKR1C1;DRD2;AGT;EDN1;AKT1;SLC7A8;SH3BP4;GJA1;ANXA1;APOE;IL1A;IL1B;AQP9;ITGB1;ARG1;LEP;LHCGR;MIF;NTRK2;PLA2G2A;PPARA;PPARG;PSEN1;RBP1;RGS4;SLC1A1;SLC2A1;SSTR4;THBS1;TNF;TRH;TRPV1;SLC38A1;NR0B2;IRS2;SFXN1;CD36;PTGES	4.16787	2.7171e-24
GOBP_PROTEIN_LOCALIZATION_TO_EXTRACELLULAR_REGION	DNM1L;CFTR;UCN3;CNR1;DRD2;F2R;F2RL1;FBN1;FGA;FOXO1;ANKRD1;ANG;GPER1;ANXA1;HIF1A;HLA-DRB1;FOXA2;IFNG;IGF1;APOE;IL1A;IL1B;IL1RN;IL6;IL12B;IL13;LEP;MIR17;MIR30C1;SMAD2;CD200;NOS2;OPRM1;TREM2;KRT20;PPARG;PSMD9;RAF1;CCL5;SFRP1;SNCG;HNF1B;TGFB1;TGFB2;TGFB3;TLR2;TLR4;TNF;TRH;VEGFC;EZR;VIP;NR0B2;CASR;IRS2;ACVR2B;CLOCK	3.89322	3.00347e-24
GOBP_VIRAL_LIFE_CYCLE	ADAR;CXCR6;CCR5;CD55;DPP4;AGTR1;EGFR;NR5A2;HLA-DRB1;HMGB1;ICAM1;IFI27;IFIT1;APOE;CXCL8;INSR;ISG20;ITGA2;ITGA5;ITGAV;ITGB1;ITGB3;LGALS1;LGALS9;LTF;MIR141;MIR30C1;MRC1;NCAM1;NOTCH1;VTA1;PPARA;SLC52A1;AXL;PVR;NECTIN1;BCL2;CCL2;CCL5;SLPI;BSG;TNF;CXCR4;HMGA2;NECTIN4;HYAL2;NRP1;CLDN1;CD86;CD74;CDK1	4.19302	3.43336e-24
GOBP_NEGATIVE_REGULATION_OF_LEUKOCYTE_MEDIATED_IMMUNITY	LILRB1;CRK;CX3CR1;CD55;AHR;TBX21;HLA-B;HLA-G;IL7R;KIR2DL4;KLRC1;ARG1;LGALS9;FOXP3;PTPRC;BCL6;CCR2	14.2835	3.63928e-24
GOBP_POSITIVE_REGULATION_OF_PEPTIDASE_ACTIVITY	PDCD6;BCL2L11;NOD1;CLDN4;CLDN3;CCN2;DAPK1;F2R;F3;FBLN1;FN1;SIRT1;GPER1;HMGB1;HSPD1;CCN1;FAS;FASLG;LGALS9;LYN;MIR17;MIR205;MIR21;MIR27B;SMAD3;MYC;NGFR;PPARG;BAX;SFRP2;SLC1A1;STAT3;TNF;TNFSF10;BCL10;WNT3A	5.62861	3.6684e-24
GOBP_TEMPERATURE_HOMEOSTASIS	PPARGC1A;CNR1;DECR1;DIO2;DRD2;EGR1;FOXO1;GATM;GJA1;IGF1R;RBPJ;IL1A;IL1B;IL4;IL13;IL15;IL18;LEP;LEPR;NOTCH1;OXTR;PRLR;PTGS2;RB1;STAT3;STAT6;ADAM17;THRA;TLR4;TNF;CCR2;VEGFA;TRPV1;CXCR4;IL18R1;HDAC3;SQSTM1;ACVR2B;ADIPOQ;CD36;PTGES	5.99039	6.13626e-24
GOBP_EPITHELIAL_TUBE_MORPHOGENESIS	YAP1;PHB2;CTHRC1;ADM;CSF1;CSF1R;CTNNB1;AGT;AGTR2;EDN1;EDNRA;EGF;MEGF8;ESR1;FGF1;FGF2;FGFR2;PLXND1;GATA3;GREM1;GDNF;FOXP1;GLI3;NR3C1;HIF1A;HOXA11;RBPJ;IHH;CXCR2;ILK;CXCL10;AR;AREG;KDR;KRAS;HES5;MIR21;TACSTD2;SMAD3;SMAD4;MDK;MET;MMP14;MYC;NOTCH1;NOTCH4;PAK1;PAX2;PGR;PIK3CD;WNT4;DLL4;MED1;PSEN1;SALL4;BCL2;BRD2;CCL11;SDC4;SFRP1;SFRP2;BMP4;BMP7;SOX9;SRC;HNF1B;TCF21;TGFB1;TGFB2;TNF;TWIST1;VDR;VEGFA;WT1…	4.05789	6.96195e-24
GOBP_ORGANIC_ANION_TRANSPORT	ABCC4;CFTR;SLCO6A1;ACE;AKR1C1;DRD2;AGT;EDN1;SLC7A8;GJA1;ANXA1;IL1A;IL1B;AQP9;ITGB1;ARG1;LEP;LHCGR;MIR33A;MIF;NOS2;NTRK2;PLA2G2A;SLC52A1;PSEN1;PTGS2;RGS4;SLC1A1;SLC2A1;SLC2A3;SSTR4;TNF;TRH;TRPV1;SLC38A1;NR0B2;CASR;SLC16A6;SLC33A1;SFXN1;CD36;PTGES;CD47	3.83608	7.22232e-24
GOBP_REGULATION_OF_BINDING	CDKN1A;CARM1;CTHRC1;LRRK2;CRK;CRMP1;PARP1;CSF3;CTNNB1;ACE;EGF;ERCC2;AKT1;DKK1;PLXND1;HEY1;POLDIP2;GATA3;ANGPT1;GSK3B;ANXA2;HDAC2;HMGB1;IFIT1;IFNG;IGF1;APOE;IL10;EIF3E;ITGA2;JUN;STMN1;LIF;LOX;MIR148A;MIR27B;SMAD2;SMAD3;SMAD4;MAP2;MET;MMP9;NFKBIA;NGF;NME1;PLK1;PON1;PPARA;PPARG;MAPK3;MAPK8;PSEN1;B2M;BAX;RB1;ACTB;ROCK1;BDNF;BMP4;SLPI;SRC;TERT;TGFB1;TGFBR1;CLDN5;TWIST1;TXN;VTN;ARHGAP28;HMGA2;NRP1;WNT3…	3.83608	7.22232e-24
GOBP_MACROPHAGE_ACTIVATION	CEBPA;LRRK2;CSF2;CX3CR1;AIF1;FCGR3A;FOXP1;HSPD1;IFNG;IFNGR1;IL4;IL6;IL10;IL13;ITGAM;JUN;MIR142;MIR145;MIR181C;MIF;CD200;ATM;TREM2;PTPRC;CX3CL1;THBS1;TLR2;TLR3;TLR4;TNF;TYROBP;TRPV1;IL33;CD74	8.6907	1.07815e-23
GOBP_RESPONSE_TO_MECHANICAL_STIMULUS	TXNIP;COL1A1;MAPK14;CSF1;CTNNB1;DRD2;AGT;EDN1;FGF2;FOS;ANKRD1;ANGPT2;IGF1R;IHH;FAS;IL1B;AQP1;IL13;CXCL10;ITGA2;ITGB3;JUN;KCNQ1;MDK;MMP2;MMP14;MPO;NFKB1;NFKBIA;P2RX3;PIK3CA;MAPK3;MAPK8;RETN;PTGER4;PTGS2;PTN;RAF1;RELA;CXCL12;SLC2A1;SOX9;SRC;TACR1;THBS1;TLR3;TLR4;TNF;TNFRSF1A;UCN;CXCR4;BCL10;IL33	5.30244	1.12706e-23
GOBP_REGULATION_OF_CELL_KILLING	KLRC4-KLRK1;RASGRP1;CD226;LILRB1;CRK;CX3CR1;CD55;F2RL1;KLRK1;CADM1;NCR3;HLA-B;HLA-DRB1;HLA-G;ICAM1;IFNG;IL4;IL7R;IL10;IL11;IL12B;IL12RB1;IL13;ITGAM;KIR2DL4;KLRC1;ARG1;LEP;LGALS9;SH2D1A;NOS2;IL23A;MAPK8;B2M;PTPRC;PVR;IL21;BCL2L1;TGFB2;TYROBP;VAV1	8.95967	1.23332e-23
GOBP_T_CELL_ACTIVATION_INVOLVED_IN_IMMUNE_RESPONSE	LILRB1;F2RL1;IL27;MTOR;GATA3;FOXP1;TBX21;ANXA1;HLA-DRB1;HMGB1;ICAM1;IFNA1;IFNA13;IFNG;IL2;IL4;IL6;IL12B;IL12RB1;IL18;LGALS3;LGALS9;MIR21;MDK;MYB;FOXP3;IL23A;PSEN1;PTGER4;IL21;BCL6;CCL19;STAT3;STAT6;TP53;IL18R1;CD86;CD74	8.10334	1.2429e-23
GOBP_POSITIVE_REGULATION_OF_LEUKOCYTE_CHEMOTAXIS	DNM1L;CXCL13;CCR1;CCR7;CSF1;CSF1R;IL34;CX3CR1;EDN1;AIF1;F2RL1;FPR2;DAPK2;MSTN;HMGB1;IL4;IL6;CXCL8;CXCR2;CXCL10;LGALS9;MDK;SERPINE1;IL23A;PGF;MAPK1;MAPK3;PTN;RARRES2;CCL1;CCL5;CCL19;CCL21;CXCL12;WNK1;ADAM17;THBS1;CCR2;VEGFA;VEGFC;CD74	9.59278	1.48914e-23
GOBP_POSITIVE_REGULATION_OF_INTERLEUKIN_8_PRODUCTION	NOD1;F2R;F2RL1;F3;HMGB1;APOA2;IL1B;IL6;LEP;LGALS9;NOS2;SERPINE1;IL17D;RELA;STAT3;TLR2;TLR3;TLR4;TNF;HYAL2;BCL10;CD14;ADIPOQ;CD74	15.0997	1.66475e-23
GOBP_CELLULAR_COMPONENT_DISASSEMBLY	DNM1L;CIB1;CFL1;PHB2;CX3CR1;DPP4;F2RL1;DKK1;DICER1;LMOD1;GBA;GPER1;GSK3B;TMOD3;HIF1A;HMGA1;IGF1R;IL6;INSR;ITGAM;STMN1;MMP1;MMP2;MMP3;MMP7;MMP9;MMP12;MMP13;MMP14;MYC;VTA1;PIK3CA;PLG;PLK1;TREM2;PRKCA;PRKCB;BAX;CX3CL1;ATG3;SNAI2;SMARCC1;FSCN1;STX5;TGFB1;TGFB3;TGFBR1;TSPO;TNF;TP53;C3;MAP1LC3B;ARID1A;DENR;BECN1;SQSTM1;CDK1	3.3321	1.72034e-23
GOBP_REGULATION_OF_CELLULAR_RESPONSE_TO_GROWTH_FACTOR_STIMULUS	PDCD6;TOB1;FST;CXCL13;CTNNB1;DCN;AGT;AGTR2;FBN1;FGF1;FGF2;FGF9;DKK1;SIRT1;GATA3;GATA6;GREM1;HDAC1;HDAC2;HIF1A;HOXA13;CCN1;RBPJ;IL1B;IL4;IL12B;ILK;ITGA5;ITGB3;KDR;HES5;LOX;ARNT;MIR10B;MIR17;MIR20A;MIR200C;MIR21;SMAD2;SMAD3;SMAD4;MIR342;NGFR;NOTCH1;PIK3CB;WNT4;PPARA;PPARG;PRKCB;SULF2;HTRA1;MIR503;SEMA6A;SMOC2;SFRP1;SFRP2;BMP4;ADAM17;ZEB1;TGFB1;TGFB1I1;TGFB3;THBS1;TP53;VEGFC;VTN;TET1;AXIN1;NRP1;CREB…	3.99183	1.74968e-23
GOBP_REGULATION_OF_TRANSMEMBRANE_TRANSPORT	ABCC9;CFTR;SCN11A;CHRM3;PHB2;CRH;CRHR1;MAPK14;CNIH3;DAPK1;ACE;DPP6;DRD2;AGT;EDN1;EDNRA;EPHB2;EPO;AKT1;F2;F2R;NEDD4L;GH1;GPER1;REM1;GSTM2;IFNG;IGF1;IL1B;IL13;CXCL10;INSR;ITGB1;ITGB3;KCNQ1;KCNQ2;ARG1;LEP;LHCGR;LYN;MIR143;MIR200C;MIR21;MIR210;MIR34A;CXCL9;MMP9;NFE2L2;NOS1;OPRM1;P2RX3;P2RX5;P2RY6;ENPP1;PIK3CG;TREM2;PRKCB;PSEN1;MIR451A;BAX;BCL2;RGS4;ACTB;CCL2;CX3CL1;WNK1;BRAF;TERT;THBS1;THY1;TNF;C3;TR…	2.98961	1.98944e-23
GOBP_LOCALIZATION_WITHIN_MEMBRANE	CIB1;AGR2;CRK;CSK;DPP6;EGFR;EPHA3;EPHB2;ERBB2;AKT1;NECTIN3;GPER1;ANK1;CCDC22;HSPA4;IFNG;APOE;AR;ITGAM;ITGB1;USP17L2;RHOG;LGALS3;LMNB1;MMP14;TREM2;VPS53;MAPK8;PTN;PTPRC;BAX;BCL2L1;ACTB;ROCK1;ATG3;GORASP1;SLC1A1;BRAF;BSG;TGFB1;THY1;TNF;TNFRSF1A;EZR;BAG6;SKAP1;SQSTM1;WNT3A;ADIPOQ;CDH1	2.86779	2.78233e-23
GOBP_POSITIVE_REGULATION_OF_ADAPTIVE_IMMUNE_RESPONSE	ADA;CD226;CD55;SIRT1;GATA3;CD274;TBX21;HLA-B;HLA-DRB1;HLA-G;HSPD1;IL1B;IL1R1;IL2;IL4;IL6;IL12B;IL12RB1;IL18;LTA;MIR21;MLH1;MSH2;FOXP3;IL23A;TREM2;B2M;PTPRC;PVR;STAT6;BTK;TGFB1;TNF;C3;CCR2;TYK2;ZP3;SKAP1;IL18R1	7.86808	3.17399e-23
GOBP_MONOCYTE_CHEMOTAXIS	CCR1;CX3CR1;DUSP1;AIF1;FLT1;FPR2;GREM1;ANXA1;HMGB1;IL6;CXCL10;LGALS3;LYN;SERPINE1;CCL1;CCL2;CCL5;CCL11;CCL14;CCL16;CCL17;CCL19;CCL21;CCL22;CCL25;CX3CL1;CXCL12;CCR2;CALCA;SLIT2	12.9435	3.2259e-23
GOBP_SEX_DIFFERENTIATION	BCL2L11;FST;ZFP42;CTNNB1;CYP1B1;CYP17A1;CYP19A1;ACE;ERCC1;ESR1;FGF9;FKBP4;FOXO3;SIRT1;FSHB;FSHR;NR5A1;GATA3;GATA6;AMH;AMHR2;GNRH1;ANG;HOXA10;HOXA11;HOXA13;HSD17B3;IL1A;INHA;INHBA;INSR;AR;KDR;LEP;LHB;LHCGR;SMAD4;MAS1;KITLG;MMP2;MMP14;MSH2;ATM;NOS3;PDGFA;PDGFRA;PDGFRB;PGR;WNT4;AXL;RETN;BAX;CCND1;BCL2;REN;BCL2L1;SDC1;SFRP1;SFRP2;BMPR1B;SLIT3;SOD1;SOX9;SOX15;SRC;SRD5A1;SRD5A2;SRY;BRCA2;TCF21;NR2F2;TG…	4.33285	3.48844e-23
GOBP_POSITIVE_REGULATION_OF_ION_TRANSPORT	CFTR;CCR1;DRD2;AGT;EDN1;EDNRA;EPHB2;AKT1;F2;F2R;GDNF;GPER1;GSTM2;IFNG;IL1A;IL1B;IL13;CXCL10;ITGB1;KCNQ1;LEP;LGALS3;LHCGR;MIR21;MIR210;MIF;CXCL9;NOS1;OXTR;P2RX3;P2RX5;P2RY6;PDGFRB;TREM2;PSEN1;BAX;ACTB;CCL2;CCL5;CX3CL1;CXCL12;WNK1;SLC6A4;SSTR4;STC1;SYT1;TSPO;THY1;TRH;TRPC6;CCR2;UCN;ACTN4;SLC38A1;CASR;CD19;MS4A1;PTGES	4.31172	4.48217e-23
GOBP_POSITIVE_REGULATION_OF_CYTOSOLIC_CALCIUM_ION_CONCENTRATION	CXCL13;CXCR6;CCR9;CCR1;CCR5;CCR7;CCR8;CNR1;ADM;ADRA1A;CX3CR1;CD55;DRD2;AGT;AGTR1;S1PR1;EDN1;EDNRA;EPO;ESR1;F2R;F2RL1;LPAR3;FPR1;FPR2;GATA2;CXCR3;GPER1;HMGB1;IAPP;IL2;CXCR1;CXCR2;ITGAV;KISS1;KNG1;LHCGR;NOS1;OXTR;P2RX3;P2RX5;PDGFRA;PIK3CG;ACKR3;PTGER2;PTGER4;PTGFR;BAX;BCL2;CCL1;TAC1;TACR1;TRPC6;CCR2;TRPV1;CXCR4;CALCA;LPAR2;CD36	5.299	4.89553e-23
GOBP_CELL_CELL_ADHESION_VIA_PLASMA_MEMBRANE_ADHESION_MOLECULES	CDH3;CDH15;MMP24;CLDN4;CLDN3;CLDN7;MAPK14;KIFAP3;CADM1;CADM2;NECTIN3;ICAM1;IL1RAP;IL1RN;IL10;ITGA5;ITGAM;ITGB1;L1CAM;CLDN11;PIK3CB;ROBO4;PTPRD;PVR;NECTIN1;CX3CL1;SELE;SELL;WNK1;BSG;TGFB2;CLDN5;TRO;VCAM1;NECTIN4;SPARCL1;CLDN1;ADIPOQ;CDH1	4.34336	5.57604e-23
GOBP_MUSCLE_SYSTEM_PROCESS	ADA;ABCC9;MYL9;PDLIM5;UTS2;AKAP13;CHRM3;LTB4R;PARP1;ADRA1A;CCN2;ADRA2B;DRD2;AGT;EDN1;EDNRA;AIF1;ENO1;EZH2;F2R;FOXO1;FOXO3;NEDD4L;MTOR;LMOD1;GATA6;GATM;MSTN;GDNF;GJA1;FOXP1;GPER1;GSTM2;TMOD3;HDAC2;NR4A1;IGF1;IL1B;IL15;ITGA2;KCNQ1;LEP;MIR143;MIR145;MIR17;MIR195;MIR20A;MIR200C;MIR21;MIR214;SMAD3;SMAD4;NOS1;NOS3;NOTCH1;OXTR;P2RX3;PIK3CA;PIK3CG;ERRFI1;PPARA;PPARG;PRKCA;SULF2;PTGS2;ACTA2;RGS4;ROCK1;SOD…	3.40288	5.97522e-23
GOBP_INTRACELLULAR_RECEPTOR_SIGNALING_PATHWAY	YAP1;CARM1;PHB2;PARP1;CYP26A1;DDX5;AHR;NR2F6;ESR1;ESR2;ESRRB;EZH2;FKBP4;SIRT1;ALOX15;NR5A2;NR5A1;PTPN22;GHRHR;FOXP1;GPER1;NR3C1;HDAC1;NR4A1;BIRC2;BIRC3;AR;USP17L2;LEP;ARNT;MIR34A;NR3C2;NFKBIA;PAK1;PGR;PPARA;PPARG;MED1;TRERF1;VPS11;AHRR;RARB;RELA;RORB;RXRA;SFRP1;SKP2;SNAI2;SRC;BRCA1;STAT3;TCF21;NR2F2;THRA;TLR4;NR2C1;NR2C2;TWIST1;VDR;RNF34;ACTN4;ARID1A;AKR1C3;NCOA1;NR1I2;CLOCK;NCOR1;NR1D2	4.49391	6.24213e-23
GOBP_LEUKOCYTE_APOPTOTIC_PROCESS	ADA;BCL2L11;CDKN2A;LILRB1;CCR7;AKT1;KIFAP3;SIRT1;FOXP1;TNFRSF21;GLI3;CD274;ANXA1;HIF1A;FAS;IL2;IL2RA;FASLG;IL6;IL7R;CXCR2;IL10;IDO1;LGALS3;LGALS9;LYN;KITLG;MIF;PDCD1;PIK3CB;PIK3CD;AXL;PTEN;BAX;BCL2;BCL2L1;BCL6;CCL5;CCL19;CCL21;CXCL12;BMP4;ADAM17;BTK;TP53;CASP3;IRS2;BCL10;CD74	7.94232	6.2718e-23
GOBP_IN_UTERO_EMBRYONIC_DEVELOPMENT	ADA;BCL2L11;YAP1;CEBPA;ADM;CSF2;CTNNB1;EDN1;EDNRA;EGFR;ERCC2;AKT1;ESRRB;FGFR2;HEY1;GABPA;GATA2;GATA3;GATA6;FOXD3;GLI3;ANGPT1;DNMT3L;HIF1A;HSD17B2;IGF1;CCN1;RBPJ;IHH;IL10;AR;ITGB1;LIF;ARNT;SMAD2;SMAD3;SMAD4;MSH2;NOS3;NOTCH1;YBX1;PDGFRA;PLG;POU5F1;MED1;MAPK1;MAP2K1;SALL4;BCL2L1;BMP7;SNAI1;SOX15;BRCA2;HNF1B;NR2F2;TGFB3;TGFBR1;TP53;C5;TWIST1;VEGFA;ZP3;TET1;AXIN1;NCOA1;CCNB1;WNT3A;ACVR1B;COPS2;HAND2;G…	3.63603	6.43722e-23
GOBP_POSITIVE_REGULATION_OF_NF_KAPPAB_TRANSCRIPTION_FACTOR_ACTIVITY	NOD1;CIB1;CHUK;CTH;CX3CR1;AGT;GREM1;AMH;IL1B;IL1RAP;IL6;IL18;AR;LGALS9;LTF;PRKCB;RELA;CX3CL1;STAT3;BTK;TLR2;TLR3;TLR4;TNF;CARD11;CAT;IL18R1;BCL10;CD36;CLOCK;CD40LG	6.37227	7.6796e-23
GOBP_POSITIVE_REGULATION_OF_LEUKOCYTE_MEDIATED_IMMUNITY	KLRC4-KLRK1;RASGRP1;CD226;CD55;F2RL1;KLRK1;CADM1;NCR3;GATA3;TBX21;HLA-B;HLA-DRB1;HLA-G;HSPD1;IL1B;IL1R1;IL2;IL4;IL6;IL12B;IL12RB1;IL18;ITGAM;KIR2DL4;ARG1;LTA;SH2D1A;MLH1;MSH2;NOS2;FOXP3;IL23A;TREM2;B2M;PTPRC;PVR;IL21;STAT6;BTK;TGFB1;TNF;C3;TYROBP;VAV1;ZP3;IL18R1	6.81374	9.38859e-23
GOBP_REGULATION_OF_NERVOUS_SYSTEM_DEVELOPMENT	PLXNC1;YAP1;SEMA3C;CRABP2;IL34;CTNNB1;CX3CR1;ACE;DRD2;MEGF8;EPHB2;AKT1;EZH2;F2;FGF2;KIFAP3;DKK1;PLXND1;FN1;DICER1;HEY1;LPAR3;MTOR;TNFRSF21;GLI3;GPER1;ANXA2;HDAC1;HDAC2;HGF;HIF1A;ID2;IFNG;IL1B;IL1RAP;IL6;ITGB1;KRAS;HES5;L1CAM;LIF;LIMK1;LTA;LYN;MIR142;MIR181C;MAP2;MDK;MECP2;MME;NGF;NOTCH1;NTRK2;NTRK3;OPRM1;OXTR;SERPINF1;TREM2;DLL4;MAP2K1;PSEN1;B2M;PTEN;SEMA6A;PTN;PTPRD;RB1;BDNF;CCL11;CX3CL1;CXCL12;…	3.3732	1.04404e-22
GOBP_NEGATIVE_REGULATION_OF_ADAPTIVE_IMMUNE_RESPONSE	LILRB1;CD55;AHR;ALOX15;TBX21;HLA-G;IL2;IL4;IL7R;KLRC1;ARG1;FOXP3;PTPRC;BCL6;IL33	14.6953	1.1377e-22
GOBP_POSITIVE_REGULATION_OF_PROTEIN_LOCALIZATION	DNM1L;YAP1;CIB1;AGR2;CFTR;UCN3;PARP1;MAPK14;EGF;EGFR;EPHA3;EPHB2;ERBB2;AKT1;F2;F2RL1;FGA;NUP62;ANKRD1;GLI3;ANG;GPER1;GSK3B;HIF1A;HLA-DRB1;IFNG;IGF1;IL1A;IL1B;IL13;ITGAM;ITGB1;RHOG;LEP;LGALS3;LIF;SMAD3;NGFR;PLK1;TREM2;PPARG;VPS11;MAPK8;PSEN1;PSMD9;PTGS2;SRC;TERT;TGFB1;TGFB2;TGFB3;TLR2;TLR4;TNF;TRH;TYROBP;VEGFC;EZR;WNT7A;NR0B2;CASR;IRS2;HYAL2;HDAC3;SQSTM1;WNT3A;CDK1;CDH1	3.39062	1.16879e-22
GOBP_CALCIUM_MEDIATED_SIGNALING	ADA;CIB1;CXCR6;CCR9;CHRM3;LRRK2;CCR1;CCR5;CCR7;CCR8;CX3CR1;AGTR1;EDN1;FCGR3A;FPR2;MTOR;NR5A2;NR5A1;CXCR3;GSK3B;GSTM2;IGF1;CXCL8;CXCR1;CXCR2;KDR;LHCGR;P2RX3;P2RX5;TREM2;ACKR3;PTBP1;PTGFR;PTPRC;SELE;BTK;TNF;CCR2;VCAM1;CXCR4	5.18506	1.24219e-22
GOBP_POSITIVE_REGULATION_OF_VASCULATURE_DEVELOPMENT	PDCD6;PAK4;ADM;CX3CR1;CYP1B1;ETS1;F3;FGF1;FGF2;FLT1;SIRT1;GATA2;GATA6;GREM1;ANGPT2;HGF;HIF1A;IL1A;IL1B;CXCL8;CXCR2;AQP1;IL10;ITGA5;ITGB1;ITGB3;ITGB8;JAK1;KDR;MIRLET7B;MIR126;MIR132;MIR143;MIR20A;MIR21;MIR210;MIR27B;MIR30A;MIR31;MDK;NFE2L2;NINJ1;NOS3;MIR378A;SERPINE1;PGF;PIK3CD;PRKCA;PRKCB;MYDGF;MIR451A;S100A1;CCL11;SMOC2;SFRP2;BRCA1;STAT3;BTG1;TEK;TERT;THBS1;TLR3;C3;C5;TWIST1;VEGFA;VEGFC;XBP1;CXC…	5.55113	1.34021e-22
GOBP_MUSCLE_CELL_PROLIFERATION	CDKN1A;CDKN1B;YAP1;PPARGC1A;MAPK14;CTNNB1;DNMT1;AGT;HBEGF;S1PR1;EDN1;AIF1;AKT1;FGF2;FGF9;FGFR2;FOS;POLDIP2;GATA6;MSTN;GJA1;FOXP1;PDCD4;GLI1;ANG;ANGPT1;GPER1;HDAC1;HGF;HPGD;ID2;IFNG;IGF1;APOE;IGF1R;IGFBP3;RBPJ;IL6;IL10;IL12B;IL13;IL15;IL18;ITGA2;ITGB3;JUN;HES5;MIR143;MIR145;MIR17;MIR20A;MIR200B;MIR204;MIR21;MIR214;MIR27B;MIR34A;MMP2;MMP9;MNAT1;MIR135B;NOS3;NOTCH1;P2RY6;PDGFRB;PIK3CA;PPARG;PTEN;PTG…	4.66	1.34428e-22
GOBP_REGULATION_OF_CELL_CYCLE	SRA1;BCL2L11;KIF20A;CDK4;CDK6;CDKN1A;CDKN1B;CDKN2A;CDKN3;CEBPA;CTCF;LILRB1;BRD8;NUDT6;PHB2;CKS1B;MAPK14;CCN2;CTNNB1;CYP1A1;DRD2;DUSP1;EDN1;EGF;EGFR;EIF4EBP1;AIF1;ERCC2;AKT1;ERCC6;EZH2;FANCD2;FEN1;FGF2;FGFR2;FOXM1;PLCB1;SIRT1;NUP62;POLDIP2;GATA3;GLI1;GPER1;GTF2H1;TMOD3;ANXA1;H2AX;HLA-G;NR4A1;HOXA13;HPGD;APEX1;BIRC2;BIRC3;BIRC5;ID2;IGF1;IGF1R;IL1A;IL1B;IL10;INHA;INHBA;INSR;ITGB1;JUN;USP17L2;LEP;LIF…	2.32451	1.37209e-22
GOBP_POSITIVE_REGULATION_OF_INTERFERON_GAMMA_PRODUCTION	KLRC4-KLRK1;RASGRP1;CD226;LILRB1;F2RL1;KLRK1;IL27;PTPN22;HLA-DPB1;HSPD1;IL1B;IL1R1;IL2;IL12B;IL12RB1;IL18;LGALS9;LTA;IL23A;IL21;TLR3;TLR4;TNF;CCR2;TYK2;ZP3;IL18R1;CD14	11.4833	1.45945e-22
GOBP_DEVELOPMENTAL_PROCESS_INVOLVED_IN_REPRODUCTION	BCL2L11;CDKN1B;FST;CIB1;KHDRBS1;CFTR;PHB2;LRRK2;CNR1;ZFP42;PARP1;CSF1;CTNNB1;CYP1B1;CYP17A1;CYP19A1;ACE;DNMT3A;EDN1;EDNRA;EPOR;ERCC1;AKT1;ESR1;FGF9;FGFR2;FKBP4;FOXO3;SIRT1;CADM1;MTOR;FSHB;FSHR;NR5A1;GALNT3;NECTIN3;GATA3;GATA6;AMH;AMHR2;GJA1;GJB2;GLI1;GLI3;GNRH1;ANG;ANGPT2;GPX4;MSH6;DNMT3L;ANXA1;H2AX;HOXA10;HOXA11;HOXA13;HSD17B3;BIRC3;TNC;IGF1;IHH;IL1A;IL1B;INHA;INHBA;INSR;AR;AREG;KDR;LEP;LHB;LHCG…	2.47025	1.60848e-22
GOBP_LEUKOCYTE_MEDIATED_CYTOTOXICITY	KLRC4-KLRK1;RASGRP1;CD226;LILRB1;CRK;CX3CR1;F2;F2RL1;FCGR3A;KLRK1;CADM1;NCR3;HLA-B;HLA-DRB1;HLA-G;HPRT1;ICAM1;IL7R;IL12B;IL12RB1;IL18;ITGAM;KIR2DL4;KIR3DL1;KLRC1;ARG1;LEP;LGALS9;SH2D1A;NOS2;IL23A;B2M;PTPRC;PVR;IL21;TYROBP;VAV1;ULBP3;ULBP2	7.05484	1.70964e-22
GOBP_REGULATION_OF_MAP_KINASE_ACTIVITY	RASGRP1;AKAP13;LRRK2;CSK;IL34;AGT;DUSP1;EDN1;EGF;EGFR;ERBB2;EZH2;FGF1;FGF2;DKK1;FLT1;NUP62;PTPN22;GBA;GH1;PDCD4;GSTP1;APOE;IL1B;INSR;LYN;KITLG;MIF;MST1R;NTF3;NTRK3;PAK1;PDGFA;PDGFRB;PIK3CB;PIK3CG;PPARG;MAP2K7;PSEN1;PTPRC;CCL19;SFRP1;SFRP2;BMP4;BMP7;SRC;TDGF1;TGFB1;THBS1;TLR4;TNF;UCHL1;VEGFA;AXIN1;HYAL2;ADIPOQ	5.50591	1.86104e-22
GOBP_PHAGOCYTOSIS	OLFM4;CLCN3;CRP;SIRPA;CSK;AHSG;AIF1;F2RL1;FPR2;ALOX15;GATA2;ANXA1;HCK;HMGB1;APOA2;IFNG;TICAM2;IL1B;IL2RB;IL15;ITGA2;ITGAM;ITGAV;ITGB1;ITGB3;RHOG;LEP;LEPR;LIMK1;LYN;MIR17;MIR183;MIR20A;MBL2;MET;MST1R;P2RY6;PAK1;PIK3CA;TREM2;AXL;PTPRC;CCL2;ATG3;SOD1;SRC;BTK;THBS1;TLR2;TLR4;TNF;C3;TYROBP;VAV1;BECN1;CD14;ADIPOQ;CD36;CD47;CDC42	4.09812	1.96792e-22
GOBP_SKIN_DEVELOPMENT	CDH3;ABCB6;YAP1;FST;TXNIP;HPSE;COL1A1;CLDN4;CTNNB1;DLX3;EGFR;ERCC2;EZH2;FGFR2;DKK1;GATA6;GBA;INTU;ANXA1;HDAC1;HDAC2;RBPJ;IL1A;IL18;INHBA;ITGA2;STMN1;SMAD4;MET;NGFR;NOTCH1;PDGFA;ERRFI1;MED1;MAP2K1;PSEN1;BCL2;RELA;ROCK1;SNAI1;SOX9;TGFB2;TNF;VDR;ZFP36;CASP3;LGR5;AKR1C3;CLDN1;ACVR1B	4.14258	1.97109e-22
GOBP_INTERLEUKIN_2_PRODUCTION	GATA3;TBX21;ANXA1;IL1A;IL1B;MIR181C;FOXP3;PTPRC;CCR2;EZR;ZFP36;CARD11;RUNX1;CD86	14.1507	2.43267e-22
GOBP_REGULATION_OF_CELLULAR_CATABOLIC_PROCESS	MIR543;BCL2L11;DNM1L;TOB1;NOD1;CEBPA;DEPP1;LRRK2;CNR1;MAPK14;ADRA1A;DAPK1;DCN;EGF;ELAVL1;AKT1;FOXO1;FOXO3;SIRT1;DAPK2;SH3BP4;MTOR;RNF19A;POLDIP2;PTPN22;GBA;GDNF;CCDC22;MYLIP;GSK3B;ANXA2;HGF;HIF1A;HMGB1;HP;APEX1;IFNG;IGF1;APOE;IL1B;IL4;IL6;IL10;INSR;KDR;LEP;LEPR;ARNT;MIRLET7B;MIR21;MDM2;MET;MLH1;ATM;NFE2L2;YBX1;PIK3CA;PIK3CB;PIK3CG;PLK1;TREM2;PPARA;PRKCA;MAPK3;MAPK8;PSEN1;PSMD10;PTEN;BAX;BCL2;ROCK…	2.62034	3.32369e-22
GOBP_INTERLEUKIN_1_PRODUCTION	NOD1;CCR7;SIRPA;CX3CR1;EGR1;F2R;F2RL1;FOXP1;GSTP1;ANXA1;HDAC2;HK1;HMGB1;IFNG;IGF1;IL6;IL10;IL16;IL17A;LGALS9;MIR132;MIR142;MIR181C;MIR195;MIR204;MIR27B;SMAD3;ERRFI1;TREM2;MIR488;CCL19;CX3CL1;STAT3;TLR4;TNF;TYROBP;IL1R2;CD36	7.09749	3.46661e-22
GOBP_TOLL_LIKE_RECEPTOR_SIGNALING_PATHWAY	FCRL3;ESR1;F2RL1;PTPN22;HMGB1;BIRC2;BIRC3;HSPD1;TICAM2;LGALS9;LTF;LYN;MIR17;NFKBIA;NINJ1;TREM2;BTK;TLR2;TLR3;TLR4;TNF;BCL10;CD14;CD36	7.23757	4.58639e-22
GOBP_RAS_PROTEIN_SIGNAL_TRANSDUCTION	RASGRP1;CDKN1A;CDKN2A;CFL1;AKAP13;CRK;CSF1;ADRA1A;DNMT1;DOK1;AGTR1;AIF1;EPHB2;EPO;F2R;F2RL1;FGF2;FOXM1;NUP62;IGF1;APOE;ITGB1;JUN;KRAS;RHOG;STMN1;LIMK1;MET;KITLG;NGF;NGFR;NOTCH1;NRAS;PDGFRB;PIK3CB;PIK3CG;RAF1;RASA1;RB1;BCL6;ROCK1;SRC;TGFB2;TP53;NRP1;SQSTM1;GRAP2;CDC42	3.76125	4.7609e-22
GOBP_NEGATIVE_REGULATION_OF_GENE_EXPRESSION	CDKN2B-AS1;CDH3;MIR543;MIR1185-1;TOB1;CDKN1A;ADAR;YAP1;CTCF;LILRB1;FCRL3;LRRK2;CCR1;CCR7;CD200R1;CPB2;CLDN3;SIRPA;MAPK14;CSK;CCN2;CTNNB1;CX3CR1;DAPK1;ACE;DDX5;DNMT1;DNMT3A;EDN1;EGFR;EIF4EBP1;AIF1;ELAVL1;EPHB2;AKT1;ESR1;EZH2;F2;F2RL1;HOXA11-AS;FGF2;ZHX2;FN1;DICER1;SIRT1;PTPN22;GATA2;GATA3;GATA6;GBA;GDNF;FOXP1;IL37;TNFRSF21;PDCD4;RBMS3;ANG;ANGPT1;GPER1;CD274;GSK3B;GSTP1;DNMT3L;TBX21;ANXA1;HDAC1;HGF…	2.09525	5.17856e-22
GOBP_REGULATION_OF_PHAGOCYTOSIS	OLFM4;SIRPA;CSK;AHSG;F2RL1;FPR2;ALOX15;GATA2;HCK;HMGB1;APOA2;IFNG;IL1B;IL2RB;IL15;ITGA2;ITGAV;MIR17;MIR183;MIR20A;MBL2;TREM2;PTPRC;CCL2;ATG3;SOD1;BTK;TLR2;TNF;C3;ADIPOQ;CD36;CD47	8.43357	5.69716e-22
GOBP_MESENCHYMAL_CELL_DIFFERENTIATION	PDCD6;SEMA3C;COL1A1;CTNNB1;DDX5;EDN1;EDNRA;EPHA3;EZH2;FGFR2;FN1;HEY1;MTOR;GATA3;GREM1;GDNF;PDCD4;GSK3B;HDAC2;HGF;HIF1A;FOXA2;IGF1;RBPJ;IL1B;IL6;MIR21;SMAD2;SMAD3;SMAD4;MDK;KITLG;MIR342;NOTCH1;NOTCH4;PAX2;WNT4;MAPK1;MAPK3;PTEN;SEMA6A;BCL2;ROCK1;S100A4;SFRP1;SFRP2;BMP4;BMP7;SNAI2;SNAI1;SOX9;TCF21;TGFB1;TGFB1I1;TGFB2;TGFB3;TGFBR1;TWIST1;HMGA2;NRP1;HAND2;SEMA3E;CDC42	4.47705	8.72006e-22
GOBP_POSITIVE_REGULATION_OF_CYTOKINE_PRODUCTION_INVOLVED_IN_IMMUNE_RESPONSE	NOD1;CD226;LILRB1;CD55;F2RL1;SIRT1;GATA3;TBX21;HK1;HLA-G;IL1B;IL1R1;IL4;IL6;IL18;KIR2DL4;MIF;B2M;TLR3;TLR4;IL18R1;BCL10;CD36;CD74	10.6213	9.3355e-22
GOBP_SENSORY_ORGAN_MORPHOGENESIS	TSHZ1;CTHRC1;OSR2;CTNNB1;DLX5;EDN1;EDNRA;EPHB2;FBN1;FGF2;FGF9;FGFR2;ZHX2;FJX1;NECTIN3;GATA2;GATA3;INTU;GLI3;HDAC1;HDAC2;HIF1A;IHH;FASLG;AQP1;AQP5;KCNQ1;KDR;NOTCH1;NTRK2;PAX2;MAPK1;MAPK3;BAX;NECTIN1;RARB;BCL2;RORB;SLC1A1;BMP4;BMP7;SOD1;SOX9;STAT3;ZEB1;THY1;TWIST1;VEGFA;PAX8;BCAR3;PROM1;WNT3A	4.2981	9.93675e-22
GOBP_COGNITION	LILRB2;CNR1;CREB1;CRH;CX3CR1;DRD2;AGT;EGFR;EPHB2;FEN1;DKK1;PLCB1;FOS;GATM;HIF1A;APOE;INSR;ITGA5;ITGB1;KRAS;LHCGR;MDK;MECP2;MME;NGF;NTF3;NTF4;NTRK2;OXTR;SERPINF1;TREM2;PPT1;MAPK1;PSEN1;B2M;PTEN;PTGS2;PTN;BDNF;S100B;CCL11;SLC1A1;SLC2A4;SLC6A4;SRC;BRAF;TACR1;THRA;TLR2;CLDN5;TNF;UCN;VIP;CASP3;MAGT1	3.97131	9.94057e-22
GOBP_REGULATION_OF_NEUROGENESIS	PLXNC1;YAP1;SEMA3C;CRABP2;IL34;CTNNB1;CX3CR1;ACE;DRD2;MEGF8;EPHB2;EZH2;F2;FGF2;KIFAP3;PLXND1;FN1;DICER1;HEY1;LPAR3;MTOR;GLI3;GPER1;ANXA2;HDAC1;HDAC2;HIF1A;ID2;IFNG;IL1B;IL6;ITGB1;KRAS;HES5;L1CAM;LIF;LIMK1;LTA;LYN;MIR142;MIR181C;MAP2;MDK;MECP2;MME;NGF;NOTCH1;NTRK2;NTRK3;OPRM1;SERPINF1;TREM2;DLL4;MAP2K1;PSEN1;B2M;PTEN;SEMA6A;PTN;PTPRD;RB1;BDNF;CCL11;CX3CL1;CXCL12;GORASP1;BMP7;SPP1;BRAF;TGFB1;TSPO;T…	3.60973	1.08876e-21
GOBP_ANTIGEN_RECEPTOR_MEDIATED_SIGNALING_PATHWAY	ADA;KHDRBS1;CD226;FCRL3;CCR7;CSK;CTLA4;PTPN22;GATA3;FOXP1;TNFRSF21;HLA-DPB1;HLA-DQB1;HLA-DRB1;LGALS3;LYN;SH2D1A;MIR34A;FOXP3;PIK3CA;PIK3CD;PRKCB;MAPK1;PSEN1;PTPRC;BAX;BCL2;RELA;WNK1;BRAF;BTK;THY1;EZR;CARD11;SKAP1;BCL10;CD19;MS4A1;CD79A	4.55994	1.29413e-21
GOBP_REGULATION_OF_LEUKOCYTE_APOPTOTIC_PROCESS	ADA;BCL2L11;CDKN2A;LILRB1;CCR7;KIFAP3;SIRT1;FOXP1;CD274;ANXA1;HIF1A;IL2;IL7R;CXCR2;IL10;IDO1;LGALS3;LGALS9;LYN;KITLG;MIF;PDCD1;PIK3CB;PIK3CD;AXL;PTEN;BAX;BCL2;BCL2L1;BCL6;CCL5;CCL19;CCL21;CXCL12;BMP4;ADAM17;BTK;TP53;IRS2;BCL10;CD74	9.13937	1.43969e-21
GOBP_POSITIVE_REGULATION_OF_LIPID_METABOLIC_PROCESS	PPARGC1A;CCR7;ADM;CREB1;AKT1;F2;FGF1;FGF2;FLT1;MTOR;FSHB;ANXA1;APOA2;HSD17B13;IFNG;APOE;IGF1R;CCN1;IL1A;IL1B;LYN;PDGFRA;PDGFRB;WNT4;PPARA;PPARG;PTGS2;CCL19;CCL21;SRC;STAR;TEK;TGFB1;TNF;TWIST1;IRS2;CD19;ADIPOQ;CD74;CDC42	6.14947	1.45397e-21
GOBP_REGULATION_OF_T_CELL_MEDIATED_IMMUNITY	LILRB1;CD55;AHR;GATA3;TBX21;HLA-B;HLA-DRB1;HLA-G;HMGB1;HSPD1;IL1B;IL1R1;IL4;IL6;IL7R;IL12B;IL12RB1;IL18;KLRC1;ARG1;FOXP3;IL23A;B2M;PTPRC;PVR;TNFRSF1B;CCR2;ZP3;IL18R1	9.49478	1.57479e-21
GOBP_MULTI_MULTICELLULAR_ORGANISM_PROCESS	CNR1;ADM;CLDN4;CRH;CRHR1;PARP1;ADRA2B;CYP1A1;ACE;AGRP;AGT;EDN1;EPO;EPOR;AKT1;ESR1;FBLN1;FKBP4;FOS;FSHB;GJA1;GJB2;ANGPT2;HPGD;HSD11B2;IGFBP7;IHH;IL1B;IDO1;AR;ITGA2;ITGA5;ITGB3;ARG1;LEP;LGALS9;LIF;MIR21;STS;MMP2;MMP9;OXTR;PAPPA;PGF;PGR;WNT4;MED1;PRL;PRLR;PTGFR;PTGS2;PTN;RXFP1;BCL2;SLC2A1;SLC6A4;SOD1;SPP1;STC1;BSG;TAC1;TACR1;NR2F2;TGFB3;TIMP1;TRO;UCN;VDR;VEGFA;CALCA;SLC38A1;STC2;ACVR1B	4.8708	1.79544e-21
GOBP_AMIDE_TRANSPORT	ABCC4;CFTR;UCN3;CNR1;CRH;CRHR1;DRD2;EDN1;FGA;FOXO1;GHRH;GHRHR;GJA1;GPER1;ANXA1;HIF1A;HLA-DRB1;FOXA2;IFNG;IL1B;IL1RN;IL6;AQP1;AQP9;KISS1;LEP;SMAD2;NOS2;PSMD9;RAF1;CCL5;SFRP1;HNF1B;TNF;TRH;UCN;VIP;TRPV1;CA2;PAX8;NR0B2;CASR;IRS2;SLC33A1;ACVR2B;CLOCK;CD74	4.04184	2.09815e-21
GOBP_PROTEIN_PROCESSING	LRRK2;CPB2;CPM;PARP1;ACE;DPP4;ENO1;F3;FGA;GLI3;ANXA2;HP;IHH;USP17L2;MME;MMP14;SERPINE1;PLAU;PSEN1;REN;SRC;ADAM17;THBS1;C1R;IL1R2;CASP3;RUNX1	4.4411	2.33258e-21
GOBP_GASTRULATION	CTNNB1;DUSP1;DUSP2;MEGF8;FGFR2;DKK1;FN1;GATA6;GJA1;FOXA2;HOXA11;IL1RN;IL10;INHBA;ITGA2;ITGA5;ITGAV;ITGB1;ITGB3;LAMB1;MIR145;MIR200C;SMAD2;SMAD3;SMAD4;MMP2;MMP9;MMP14;PAX2;POU5F1;MAP2K1;SFRP1;SFRP2;WNK1;BMP4;BMP7;SNAI1;SOX2;HNF1B;TP53;VTN;NANOG;HMGA2;AXIN1;FZD7;WNT3A;ACVR2B;ADIPOQ;GDF3	5.17127	2.33919e-21
GOBP_CALCIUM_ION_TRANSPORT	DNM1L;LILRB2;LILRB1;FCRL3;CCR1;CCR5;CCR7;CRHR1;ADRA1A;CCN2;CTNNB1;ACE;DRD2;AGT;EDN1;EDNRA;EGF;EPO;F2;F2R;FGF2;GPER1;REM1;GSTM2;ANXA2;FASLG;IL13;IL16;CXCL10;ITGAV;ITGB3;LGALS3;LHCGR;LYN;MIR200C;MIR21;MIR34A;CXCL9;NOS1;NOS3;OPRM1;P2RX3;P2RX5;P2RY6;PDGFRB;PIK3CG;PRKCB;PSEN1;PTGS2;PTPRC;BAX;BCL2;RGS4;CCL2;CCL5;CCL19;CCL21;CX3CL1;CXCL12;STC1;TSPO;THY1;TPT1;TRPC6;UCN;VDR;TRPV1;CXCR4;CASR;STC2;WNT3A;CD1…	3.32022	2.43667e-21
GOBP_POSITIVE_REGULATION_OF_LYMPHOCYTE_DIFFERENTIATION	ADA;RASGRP1;LILRB2;FOXO3;GATA3;GLI3;ANXA1;HLA-DRB1;HLA-G;IFNG;IHH;IL2;IL2RA;IL4;IL7;IL7R;IL10;IL12B;IL12RB1;IL15;IL18;LGALS9;MIR21;MDK;MMP14;MYB;FOXP3;IL23A;AXL;PTPRC;ACTB;BCL6;CCL19;SMARCC1;BTK;XBP1;ARID1A;RUNX1;RUNX3;CD86;CD74	6.87168	2.4413e-21
GOBP_LIPOPOLYSACCHARIDE_MEDIATED_SIGNALING_PATHWAY	MAPK14;CD55;AKT1;PTPN22;HCK;IL1B;IL18;LTF;LYN;MIF;NFKBIA;NOS3;PRKCA;MAPK1;MAPK3;CCL2;CCL5;CX3CL1;TGFB1;TLR2;TLR4;TNF;BCL10;CD14;CD36	13.2625	3.33517e-21
GOBP_LYMPHOCYTE_CHEMOTAXIS	KLRC4-KLRK1;CXCL13;KLRK1;CXCL10;PIK3CD;PIK3CG;CXCL16;CCL1;CCL2;CCL5;CCL11;CCL14;CCL16;CCL17;CCL19;CCL21;CCL22;CCL25;CX3CL1;WNK1;ADAM17;CCR2	13.2625	3.33517e-21
GOBP_PEPTIDYL_SERINE_MODIFICATION	CHUK;LRRK2;MAPK14;CSF3;DCN;EGFR;EPO;AKT1;DKK1;MTOR;GALNT3;ANGPT1;GSK3B;HGF;IFNA1;IFNA13;IFNG;IL6;IL11;ILK;LIF;MIR132;MIF;ATM;NGF;NOS1;NTF3;NTF4;NTRK2;NTRK3;PAK1;PIK3CA;PLK1;PRKCA;PRKCB;MAPK1;MAPK8;PTEN;PTGS2;BAX;RAF1;BCL2;ROCK1;BDNF;SFRP2;SLC1A1;WNK1;SRC;BRAF;TDGF1;TGFB1;TGFBR1;TNF;TXN;UCN;VEGFA;NDNF;AXIN1;BCAR3;WNT3A;CD44;RASSF2;CDK1	3.80005	3.46905e-21
GOBP_REGULATION_OF_DEVELOPMENTAL_GROWTH	BCL2L11;CDK4;CDKN1A;CDKN1B;YAP1;SEMA3C;AGR2;CRABP2;CREB1;MAPK14;CSF1;ARX;DPYSL2;DRD2;DUSP6;EDN1;MEGF8;AKT1;FGF2;FGF9;FGFR2;PLCB1;NEDD4L;FN1;LPAR3;GATA6;MSTN;GH1;GHRH;GHRHR;FOXP1;GLI1;GSK3B;IGF1;APOE;RBPJ;IL7;INSR;AR;L1CAM;LEP;LIMK1;MIR200B;MIR204;MAP2;NGF;NOTCH1;PIK3CA;PPARA;PRL;PTEN;SEMA6A;BCL2;RGS4;BDNF;CXCL12;BMP4;SLC6A4;SOD1;SOX15;SPP1;STAT3;SYT1;HNF1B;TGFBR1;VEGFA;EZR;WT1;ZP3;CXCR4;RUNX1;STC…	3.80005	3.46905e-21
GOBP_NEGATIVE_REGULATION_OF_HYDROLASE_ACTIVITY	KLRC4-KLRK1;LRRK2;AGT;AHSG;AKT1;KLRK1;SH3BP4;GSK3B;ANXA1;ANXA2;HGF;NR4A1;BIRC2;BIRC3;BIRC5;APOA2;IL9;AQP1;USP17L2;KNG1;LEPR;LGALS3;LPA;LTF;MIRLET7B;MIR17;MIR195;MIR21;MIR29C;MMP9;NGF;NOS1;NOS3;SERPINE1;SERPINB2;PAX2;SERPINF1;SERPINA1;PTGS2;RAF1;RARRES1;ROCK1;SFRP2;WNK1;SLPI;SRC;TERF1;TGFB2;THBS1;TIMP1;TIMP2;TIMP3;TIMP4;SERPING1;TNF;C3;C5;VEGFA;VTN;RNF34;SERPINH1;CD44;HDAC9	3.59602	3.50827e-21
GOBP_ALPHA_BETA_T_CELL_DIFFERENTIATION	ADA;IL27;MTOR;GATA3;FOXP1;GLI3;TBX21;ANXA1;HLA-DRB1;HMGB1;IFNG;IHH;IL2;IL4;IL6;IL12B;IL12RB1;IL18;LGALS9;MIR21;MYB;FOXP3;IL23A;PTGER4;IL21;BCL2;BCL6;CCL19;BRAF;STAT3;STAT6;RUNX1;RUNX3;IL18R1;CD86	7.39929	3.74484e-21
GOBP_BIOLOGICAL_PROCESS_INVOLVED_IN_SYMBIOTIC_INTERACTION	CFL1;CCR5;CSF1R;CX3CR1;CD55;DPP4;AGTR1;EGFR;F2;F2RL1;FN1;HDAC1;HLA-DRB1;HMGB1;HSPD1;ICAM1;IFI27;IFIT1;APOE;CXCL8;INSR;ITGA2;ITGA5;ITGAV;ITGB1;ITGB3;JUN;ARG1;LGALS1;LGALS9;LTF;MBL2;MRC1;NCAM1;PF4;PLG;SLC52A1;AXL;ST6GALNAC1;PVR;NECTIN1;BCL2L1;CCL5;SRC;BSG;CXCR4;THOC6;HMGA2;NECTIN4;HYAL2;NRP1;CLDN1;CD86;CD74;CDK1;CDC42	3.94509	4.07928e-21
GOBP_POSITIVE_REGULATION_OF_CYSTEINE_TYPE_ENDOPEPTIDASE_ACTIVITY	PDCD6;BCL2L11;NOD1;CCN2;DAPK1;F2R;F3;SIRT1;GPER1;HMGB1;HSPD1;CCN1;FAS;FASLG;LGALS9;MIR27B;SMAD3;MYC;NGFR;PPARG;BAX;SLC1A1;TNF;TNFSF10;BCL10;WNT3A	6.24945	4.2974e-21
GOBP_CARBOXYLIC_ACID_TRANSPORT	ABCC4;ACE;AKR1C1;DRD2;AGT;EDN1;SLC7A8;GJA1;ANXA1;IL1A;IL1B;AQP9;ITGB1;ARG1;LEP;LHCGR;MIR33A;MIF;NOS2;NTRK2;PLA2G2A;PSEN1;PTGS2;RGS4;SLC1A1;SSTR4;TNF;TRH;TRPV1;SLC38A1;NR0B2;CASR;SLC16A6;SFXN1;CD36;PTGES	4.07318	4.31599e-21
GOBP_MUSCLE_CELL_DIFFERENTIATION	MYL9;PDLIM5;AKAP13;ADM;MAPK14;ADRA1A;CTH;CTNNB1;DNMT1;AGT;EDN1;EDNRA;AKT1;EZH2;FGF9;FGFR2;DKK1;SIRT1;HEY1;MTOR;LMOD1;GATA6;GREM1;ANKRD1;FOXP1;PDCD4;GPER1;TMOD3;HDAC1;ERVW-1;ID2;IGF1;RBPJ;IL4;CXCL10;ITGB1;KRAS;LAMB1;LOX;MIR100;MIR145;MIR195;MIR200B;MIR204;MIR21;MIR22;MIR34A;SMAD4;MDM2;MECP2;CXCL9;MMP14;NINJ1;NOS1;NOTCH1;YBX1;PDGFRA;PDGFRB;WNT4;PPARA;PTBP1;RARB;RB1;BCL2;RGS4;BDNF;SDC1;BMP4;SOD2;SOX…	3.40115	5.19714e-21
GOBP_HORMONE_TRANSPORT	CFTR;UCN3;CNR1;ADM;CREB1;CRH;CRHR1;CYP19A1;DRD2;AGT;AGTR1;EDN1;FGA;FOXO1;SLC7A8;GATA3;GHRH;GHRHR;GJA1;GNRHR;GPER1;ANXA1;HIF1A;HLA-DRB1;FOXA2;IFNG;IL1B;IL1RN;IL6;AQP1;IL11;INHA;INHBA;KCNQ1;KISS1;LEP;LIF;LYN;SMAD2;SMAD4;NOS2;PPARG;RETN;PSMD9;RAF1;REN;CCL5;SFRP1;SPP1;TACR1;HNF1B;BTK;TSPO;TNF;TRH;UCN;VIP;PAX8;NR0B2;CASR;IRS2;ACVR2B;ADIPOQ;CLOCK	3.9674	5.25487e-21
GOBP_REGULATION_OF_INTRACELLULAR_TRANSPORT	CIB1;KHDRBS1;LRRK2;MAPK14;ERBB2;GLI3;ANGPT1;GSK3B;ANXA2;IFI27;IFNG;IL1B;ITGAM;USP17L2;LEP;MIR17;MIR27B;SMAD3;MAP2;VPS11;MAPK1;MAPK3;MAPK8;MAP2K1;PSEN1;PTGS2;SLC1A1;BMP4;SRC;TGFB1;TXN;EZR;HYAL2;HDAC3;ADIPOQ;CD36;CDK1;CDH1	3.75386	6.58932e-21
GOBP_REGULATION_OF_TRANSMEMBRANE_RECEPTOR_PROTEIN_SERINE_THREONINE_KINASE_SIGNALING_PATHWAY	TOB1;FST;PARP1;FBN1;FGF9;DKK1;SIRT1;GATA6;GREM1;MSTN;HDAC1;HDAC2;HOXA13;CCN1;RBPJ;ILK;INHA;INHBA;KDR;HES5;LOX;MIR17;MIR20A;MIR21;SMAD2;SMAD3;SMAD4;MIR342;NOTCH1;PPARA;PPARG;HTRA1;SFRP1;SFRP2;BMP4;BMP7;ADAM17;ZEB1;TGFB1;TGFB1I1;TGFB2;TGFB3;LEFTY2;TGFBR1;THBS1;TP53;TET1;AXIN1;ACVR1B;ACVR2B;GDF3	4.03459	6.87688e-21
GOBP_REGULATION_OF_BLOOD_CIRCULATION	ADA;ABCC9;CHRM3;ADM;ADRA1A;CCN2;ADRA2B;ACE;DRD2;AGT;HBEGF;AGTR1;AGTR2;EDN1;EDNRA;F2R;FGA;GJA1;GSTM2;IL2;KCNQ1;LEP;MIR200C;MIR21;MDM2;MMP2;NOS1;NOS3;OXTR;PIK3CG;PTGS2;RGS4;S100A1;SLC1A1;STC1;TACR1;TGFB2;THRA;TNF;UCN;TRPV1;CALCA;CASR	4.26189	8.58056e-21
GOBP_RESPONSE_TO_NUTRIENT	POSTN;CNR1;COL1A1;CYP1A1;CYP1B1;CYP26A1;DNMT3A;EPO;ERCC1;MTOR;FOXA2;IGF1R;IL1A;IL15;CXCL10;ITGA2;ARG1;LEP;LTA;OGG1;TNFRSF11B;UGT1A1;PPARG;MED1;PTGS2;CCND1;RXRA;SFRP1;SFRP2;SLC6A4;BMP7;SNAI2;SOD2;SPP1;SST;STC1;TSPO;USF2;VCAM1;VDR;XBP1;CASR;CAT;STC2;AKR1C3;NCOA1;BECN1;ADIPOQ;LIPG	5.97637	8.89627e-21
GOBP_REGULATION_OF_STRESS_ACTIVATED_PROTEIN_KINASE_SIGNALING_CASCADE	RASGRP1;NOD1;CCR7;CRK;SIRPA;CCN2;DUSP1;EGFR;F2RL1;FOXM1;FOXO1;PLCB1;PTPN22;GREM1;PDCD4;GSTP1;HGF;HMGB1;IGF1R;IGFBP6;FAS;IL1A;IL1B;LEP;LGALS9;LYN;MIR20A;MYC;TREM2;MAPK1;MAPK3;MAP2K1;MAP2K7;CCL19;CCL21;SFRP1;SFRP2;BMP4;TGFB2;TLR3;TLR4;TNF;VEGFA;EZR;WNT7A;AXIN1;FZD7;HDAC3;HAND2;NCOR1;RASSF2	4.98193	1.04949e-20
GOBP_POSITIVE_REGULATION_OF_CATABOLIC_PROCESS	MIR543;BCL2L11;TOB1;CDKN1B;NOD1;CEBPA;LRRK2;DAPK1;DCN;EGF;AKT1;FOXO1;FOXO3;SIRT1;SH3BP4;MTOR;RNF19A;GBA;CCDC22;MYLIP;GSK3B;HIF1A;HMGB1;APOA2;IFNG;IGF1;APOE;IL1B;IL4;IL6;INSR;KDR;ARNT;MIR210;MDM2;MLH1;ATM;NFE2L2;YBX1;PIK3CB;PLK1;TREM2;PPARA;VPS11;MAPK3;PSEN1;PSMD10;PTEN;BAX;ROCK1;SOX9;STX5;TNF;TNFRSF1B;TWIST1;EZR;VIP;ZFP36;BAG6;AXIN1;IRS2;BECN1;IL33	3.0024	1.1214e-20
GOBP_CD4_POSITIVE_ALPHA_BETA_T_CELL_ACTIVATION	CD55;IL27;MTOR;GATA3;FOXP1;CD274;TBX21;ANXA1;HLA-DRB1;HMGB1;IFNG;IL2;IL2RA;IL4;IL6;IL12B;IL12RB1;IL18;LGALS9;MIR21;MYB;FOXP3;IL23A;PTGER4;IL21;BCL6;CCL19;BRAF;STAT3;STAT6;CARD11;RUNX1;RUNX3;IL18R1;CD86	7.3499	1.1643e-20
GOBP_PROTEIN_MATURATION	LRRK2;CPB2;CPM;PARP1;ACE;DPP4;ENO1;F3;FBLN1;FGA;FN1;GLI3;ANXA2;HP;HSPD1;IHH;USP17L2;MME;MMP14;SERPINE1;PLAU;PSEN1;REN;SRC;ADAM17;THBS1;C1R;IL1R2;NAA16;CASP3;RUNX1;SERPINH1	3.70878	1.23991e-20
GOBP_EXTRINSIC_APOPTOTIC_SIGNALING_PATHWAY	BCL2L11;YAP1;CIB1;CSF2;DAPK1;AGT;AGTR2;AKT1;FGA;FOXO3;GDNF;GPER1;PDIA3;GSK3B;GSTP1;HGF;ICAM1;IFI27;IFNG;IGF1;FAS;IL1A;IL1B;IL2;FASLG;IL4;IL7;INHBA;AR;ITGAV;LGALS3;SMAD3;KITLG;NGF;NOS3;SERPINE1;PF4;PPP2R1A;PTEN;PTPRC;BAX;RAF1;BCL2;RELA;BCL2L1;CX3CL1;SFRP1;SFRP2;BMP4;BMPR1B;SNAI2;SRC;BRCA1;TERT;TGFB1;TGFB2;TGFBR1;THBS1;TIMP3;TLR3;TNF;TNFRSF1A;TNFRSF1B;RNF34;PEA15;HYAL2;TNFSF10;NRP1;BCL10;IL33;ACVR1B	4.65147	1.27379e-20
GOBP_POSITIVE_REGULATION_OF_CELL_DEVELOPMENT	PLXNC1;CIB1;OLFM4;CRABP2;CRK;IL34;CTNNB1;CX3CR1;ACE;DRD2;MEGF8;EPHB2;FGA;FGF2;PLXND1;FN1;DICER1;LPAR3;MTOR;GLI3;GPER1;HDAC1;HDAC2;HIF1A;HOXA11;ID2;IFNG;IL1B;IL6;ILK;ITGB1;ITGB3;KRAS;L1CAM;LIF;LIMK1;LTA;LYN;MIR142;MDK;MECP2;MME;NGF;NOTCH1;NTRK2;OPRM1;SERPINF1;MAP2K1;PTN;PTPRD;BCL2;BDNF;CX3CL1;CXCL12;BMP4;BRAF;TGFB1;TSPO;TLR2;CLDN5;TNF;TNFRSF1B;TYROBP;VEGFA;VEGFC;CXCR4;NRP1;WNT3A;IL33;S1PR2;SLIT2;A…	3.89657	1.29066e-20
GOBP_RESPONSE_TO_INSULIN	CDK4;COL1A1;ADM;PARP1;MAPK14;AGRP;AGT;EGR1;AHSG;AKT1;FOXO1;SIRT1;FOS;MTOR;MSTN;GHRHR;GSK3B;HSD11B2;IGF1R;IGFBP1;IL1B;IL10;INSR;KCNQ1;LEP;LYN;MIR195;ENPP1;PIK3CA;ERRFI1;PPARA;PPARG;PRKCB;RETN;RARRES2;RB1;SHC1;SLC2A1;SLC2A4;SMARCC1;SRC;SRD5A1;TLR2;XBP1;BCAR3;CAT;NCOA1;IRS2;TNFSF10;ADIPOQ;HDAC9	4.16416	1.41829e-20
GOBP_NEGATIVE_REGULATION_OF_TRANSFERASE_ACTIVITY	CDKN1A;CDKN1B;CDKN2A;ADAR;CEBPA;CSK;AGT;DUSP1;EPHB2;AKT1;SIRT1;NUP62;PTPN22;GBA;MSTN;PDCD4;GSK3B;GSTP1;FOXA2;IFNG;APOE;IL1B;LIMK1;LYN;MIR20A;MIR27B;MIR34A;PIK3CB;PLK1;ERRFI1;PPARG;PSEN1;PTEN;PTPRC;RB1;SFRP1;SFRP2;BMP4;BMP7;SRC;TERF1;NR2F2;THY1;TP53;UCHL1;ZFP36;CASP3;IRS2;HYAL2;ADIPOQ	4.11412	1.42241e-20
GOBP_SYNAPTIC_SIGNALING	LILRB2;UTS2;PRRT2;CHRM3;CLCN3;LRRK2;CNR1;CRH;CRHR2;ADRA1A;CTNNB1;CX3CR1;ACE;DRD2;AGT;EDN1;EPHB2;AKT1;EZH2;F2R;DKK1;PLCB1;LPAR3;RNF19A;GDNF;GPER1;GSK3B;NR4A1;APOE;IL1B;IL1RAP;ITGB1;KCNQ2;KISS1;KRAS;MIR142;MECP2;MME;MIR342;NGF;NOS1;NTF3;NTF4;NTRK2;OPRM1;OXTR;P2RX3;P2RX5;PLG;PPT1;PRKCB;MAPK1;PSEN1;RETN;PTEN;PTGS2;PTN;PTPRD;RELA;RGS4;BDNF;S100B;CCL2;CX3CL1;SLC1A1;SLC6A4;SNCG;SRC;BRAF;SST;SYP;SYT1;TAC…	2.58034	2.05008e-20
GOBP_NEGATIVE_REGULATION_OF_RESPONSE_TO_WOUNDING	CPB2;CLDN3;CRK;EDN1;F2;FGA;FGF2;ANXA2;APOE;KNG1;MIR200B;MIR34A;SMAD3;MDK;NOS3;SERPINE1;SERPINB2;PDGFA;PDGFRA;PLAU;PLG;WNT4;PTEN;SPP1;THBS1;SERPING1;TNF;VTN	8.58076	2.14736e-20
GOBP_GLIAL_CELL_DIFFERENTIATION	CDK6;NDRG1;MMP24;CSK;IL34;CTNNB1;ERBB2;ERCC2;AKT1;F2;FGF2;DICER1;MTOR;GBA;TNFRSF21;GLI3;HDAC1;HDAC2;ID2;IFNG;IFNGR1;IL1B;IL6;ILK;KRAS;HES5;LIF;LYN;MIR142;MIR181C;MDK;NOTCH1;NTRK2;NTRK3;PAX2;TREM2;MAPK1;MAPK3;MAP2K1;PSEN1;PTEN;PTN;SOD1;SOX2;SOX9;STAT3;TGFB1;TLR2;TLR4;TNF;TNFRSF1B;VIM;VTN;CXCR4;IL33;CDK1	4.59238	2.19036e-20
GOBP_REGULATION_OF_CATION_TRANSMEMBRANE_TRANSPORT	ABCC9;PHB2;CRH;CRHR1;CNIH3;DAPK1;DPP6;DRD2;AGT;EDN1;EDNRA;EPHB2;EPO;F2;F2R;NEDD4L;GPER1;REM1;GSTM2;IFNG;IL13;CXCL10;ITGB1;ITGB3;KCNQ1;ARG1;LHCGR;LYN;MIR200C;MIR21;MIR210;CXCL9;MMP9;NOS1;OPRM1;P2RX3;P2RX5;P2RY6;PIK3CG;TREM2;BAX;BCL2;RGS4;CCL2;CX3CL1;WNK1;THY1;TWIST1;CCR2;UTRN;ACTN4;SLC38A1;CD19;MS4A1	3.41455	2.46968e-20
GOBP_CELLULAR_RESPONSE_TO_ABIOTIC_STIMULUS	CDKN1A;YAP1;COL1A1;PARP1;MAPK14;AGT;EGR1;EPO;ERCC1;FGF2;AKR1B1;SIRT1;MTOR;GATA3;ANKRD1;H2AX;IGF1R;FAS;IL1B;AQP1;AQP2;IL13;AQP5;ITGA2;ITGB3;MIR21;MDM2;MME;MMP1;MMP2;MMP3;MMP9;MYC;ATM;NFKB1;PCNA;PIK3CA;ERRFI1;POLD1;MAPK3;MAPK8;PTEN;PTGER4;PTGS2;BAX;BCL2L1;SAG;SFRP1;SFRP2;SLC2A1;SLC2A4;SNAI2;SOX9;BRCA1;BRCA2;TSPO;TIMP1;TLR3;TLR4;TNFRSF1A;TP53;TRPV1;CASP3;HYAL2;BCL10;IL33;CLOCK	3.67995	3.04893e-20
GOBP_REGULATION_OF_WNT_SIGNALING_PATHWAY	CDH3;YAP1;CTHRC1;LRRK2;COL1A1;MAPK14;CTNNB1;DLX5;EGF;EGFR;EGR1;FGF2;FGF9;FGFR2;DKK1;FOXO1;FOXO3;GREM1;RBMS3;GLI1;GLI3;GSK3B;HDAC1;APOE;IGFBP1;IGFBP6;RBPJ;ILK;MIR145;MIR29C;SMAD3;MDK;NFKB1;NOTCH1;PPP2R1A;SULF2;PSEN1;SFRP1;SFRP2;WNK1;SNAI2;SOX2;SOX9;SRC;HNF1B;TERT;TGFB1;TLR2;AXIN1;FZD7;LGR5;WNT3A	3.66522	3.74912e-20
GOBP_POSITIVE_REGULATION_OF_I_KAPPAB_KINASE_NF_KAPPAB_SIGNALING	NOD1;AKAP13;CHUK;CCR7;CTH;CTNNB1;F2R;F2RL1;NUP62;GJA1;CCDC22;HLA-DRB1;BIRC2;BIRC3;TICAM2;IL1A;IL1B;FASLG;RHOC;LGALS1;LGALS9;LTF;PPP5C;PRKCB;RELA;S100A4;S100B;CCL19;CCL21;CX3CL1;SLC20A1;TLR3;TLR4;TNF;TNFRSF1A;CARD11;TNFSF10;BCL10;ADIPOQ;CD36;CD74	5.0793	3.87533e-20
GOBP_RECEPTOR_SIGNALING_PATHWAY_VIA_STAT	CSF1R;CSF2;CYP1B1;AGT;EGF;EPHB2;EPO;F2;F2R;GH1;HDAC2;IFNA1;IFNA13;IFNG;IGF1;IL2;IL4;IL6;IL7R;IL9;IL10;IL12B;IL13;IL15;IL18;JAK1;HES5;LEP;LIF;LYN;MST1;NOTCH1;IL23A;PPARG;PPP2R1A;PRL;PRLR;PTPRC;PTPRD;IL21;CCL2;CCL5;STAT3;STAT4;STAT6;TGFB1;TNF;TNFRSF1A;CCR2;TYK2;VEGFA;TSLP	5.15631	4.40125e-20
GOBP_REGULATION_OF_SUPRAMOLECULAR_FIBER_ORGANIZATION	CDKN1B;CIB1;AKAP13;CCR7;CSF3;CCN2;S1PR1;EDN1;F2RL1;FKBP4;ALOX15;MTOR;LMOD1;TMOD3;HCK;IAPP;APOE;RHOC;STMN1;LIMK1;MIR20A;MIR21;MIR214;TACSTD2;MIR31;SMAD3;SMAD4;MAP2;MECP2;MET;PAK1;PIK3CA;TREM2;WNT4;PSEN1;PTGER4;RASA1;RB1;RGS4;ROCK1;CCL11;CCL21;CX3CL1;SDC4;CXCL12;SFRP1;BRAF;TACR1;TGFB3;TGFBR1;ARHGAP28;NRP1;SLIT2;CD47;CDC42	3.4337	4.45007e-20
GOBP_REGULATION_OF_ION_TRANSMEMBRANE_TRANSPORT	ABCC9;CFTR;SCN11A;CHRM3;PHB2;CRH;CRHR1;CNIH3;DAPK1;DPP6;DRD2;AGT;EDN1;EDNRA;EPHB2;EPO;F2;F2R;NEDD4L;GPER1;REM1;GSTM2;IFNG;IL13;CXCL10;ITGB1;ITGB3;KCNQ1;KCNQ2;ARG1;LHCGR;LYN;MIR200C;MIR21;MIR210;CXCL9;MMP9;NOS1;OPRM1;P2RX3;P2RX5;P2RY6;PIK3CG;TREM2;PSEN1;BAX;BCL2;RGS4;CCL2;CX3CL1;WNK1;THY1;TNF;TRPC6;TWIST1;CCR2;UTRN;ACTN4;SLC38A1;CD19;MS4A1	2.98785	4.64678e-20
GOBP_TISSUE_REMODELING	SEMA3C;CTHRC1;CSF1R;CSK;CTNNB1;ACE;AGT;AGTR2;S1PR1;EDNRA;F2R;FSHB;GREM1;GJA1;HIF1A;IAPP;RBPJ;IHH;IL1A;IL2;IL6;IL7;IL12B;IL15;IL18;ITGB3;ARG1;LEP;LEPR;LIF;MIR143;MIR17;MIR195;MIR20A;MIR214;MIR27B;MIR34A;MDK;MDM2;MMP2;MMP14;NFKB1;NOS3;TNFRSF11B;IL23A;PLG;DLL4;PPARG;PRKCA;AXL;PTN;BAX;IL21;ROCK1;SFRP1;SPP1;SRC;TGFB1;TGFB3;TIMP1;TP53;CCR2;VDR;CALCA;DCSTAMP;RUNX1;ACVR2B;HAND2;RASSF2	5.23849	4.95003e-20
GOBP_CARBOHYDRATE_DERIVATIVE_BIOSYNTHETIC_PROCESS	ADA;UST;MTCO2P12;PPARGC1A;GALNT6;CCR7;PARP1;CTNNB1;HBEGF;EGF;TET3;ENO1;EXTL3;PLCB1;GALNT3;ANGPT1;HAS1;ACACA;HPRT1;IGF1;IL1B;IL4;IL15;MIR17;MIR20A;MIR31;NFKB1;NME1;NT5E;PDGFRB;TREM2;PPARA;PPT1;ST6GALNAC1;PSEN1;BCL2;CCL19;CCL21;GORASP1;SLC2A4;BMPR1B;TGFB1;TET1;MAGT1;IL33;CHST3;TECR;HS3ST3B1	2.68506	5.1439e-20
GOBP_CELLULAR_KETONE_METABOLIC_PROCESS	PPARGC1A;CNR1;ADM;CYP2B6;CYP11A1;CYP17A1;CYP19A1;AKR1C1;AKR1C2;EGR1;AKT1;AKR1B1;FMO2;SIRT1;FSHB;ANXA1;HSD11B2;HSD17B1;HSD17B3;IL1B;IDO1;LHB;CYP4F3;MIR132;MIR204;MIR21;MIR30C1;MIR33A;WNT4;PPARA;PPARG;PTGS2;SOX9;SRD5A1;SRD5A2;BRCA1;STAR;TWIST1;AKR1C3;IRS2;ADIPOQ;NCOR1;CD74	4.63144	5.46039e-20
GOBP_T_CELL_RECEPTOR_SIGNALING_PATHWAY	ADA;KHDRBS1;CD226;CCR7;CSK;CTLA4;PTPN22;GATA3;TNFRSF21;HLA-DPB1;HLA-DQB1;HLA-DRB1;LGALS3;SH2D1A;FOXP3;PIK3CA;PIK3CD;MAPK1;PSEN1;PTPRC;RELA;WNK1;BRAF;THY1;EZR;CARD11;SKAP1;BCL10	6.23722	5.49559e-20
GOBP_GLAND_MORPHOGENESIS	SEMA3C;PHB2;CPB2;CSF1;CSF1R;EGFR;ESR1;FGF1;FGFR2;PLXND1;GLI1;GLI3;NR3C1;HGF;HOXA13;TNC;IL6;AR;AREG;ARG1;MDK;MMP2;NFKB1;NOTCH1;PDGFA;PGR;WNT4;MED1;PTN;BAX;RXFP1;BCL2;CCL11;SFRP1;BMP4;BMP7;SNAI2;SOX9;SRC;STAT6;TGFB1;TGFB2;TGFB3;TNF;VDR;EZR;XBP1;NRP1;WNT3A	6.71551	6.98159e-20
GOBP_PEPTIDE_TRANSPORT	ABCC4;CFTR;UCN3;CNR1;CRH;CRHR1;DRD2;EDN1;FGA;FOXO1;GHRH;GHRHR;GJA1;GPER1;ANXA1;HIF1A;HLA-DRB1;FOXA2;IFNG;IL1B;IL1RN;IL6;AQP1;KISS1;LEP;SMAD2;NOS2;PSMD9;RAF1;CCL5;SFRP1;HNF1B;TNF;TRH;UCN;VIP;TRPV1;CA2;PAX8;NR0B2;CASR;IRS2;ACVR2B;CLOCK;CD74	4.22354	7.37927e-20
GOBP_CELL_CYCLE_PROCESS	BCL2L11;KIF20A;CDK4;CDK6;CDKN1A;CDKN1B;CDKN2A;CDKN3;KHDRBS1;CTCF;DCTN6;CFL1;PHB2;CKS1B;MAPK14;CCN2;CTNNB1;CYP1A1;DRD2;DUSP1;EDN1;EDNRA;EGF;EGFR;EIF4EBP1;AIF1;ERCC1;ERCC2;AKT1;ERCC6;ESRRB;EZH2;FANCD2;FEN1;FOXM1;PLCB1;SIRT1;NUP62;POLDIP2;GATA6;GJA1;GLI1;GPER1;MSH6;TMOD3;DNMT3L;ANXA1;H2AX;HLA-G;HOXA13;APEX1;BIRC5;ID2;IGF1;IGF1R;IL1A;IL1B;INHBA;INSR;ITGB1;USP17L2;RHOC;STMN1;LIF;MIR195;MIR214;MIR29C;M…	2.13993	7.92931e-20
GOBP_REGULATION_OF_HORMONE_SECRETION	CFTR;UCN3;CNR1;CREB1;CRH;CRHR1;CYP19A1;DRD2;AGT;AGTR1;EDN1;FGA;FOXO1;GHRH;GHRHR;GJA1;GPER1;ANXA1;HIF1A;HLA-DRB1;FOXA2;IFNG;IL1B;IL6;IL11;INHA;INHBA;KISS1;LEP;LIF;SMAD4;NOS2;PPARG;RETN;PSMD9;REN;CCL5;SFRP1;SPP1;TACR1;TSPO;TNF;TRH;UCN;PAX8;NR0B2;CASR;IRS2;ADIPOQ;CLOCK	4.38273	8.64337e-20
GOBP_MORPHOGENESIS_OF_A_BRANCHING_STRUCTURE	YAP1;SEMA3C;PHB2;LRRK2;ADM;CSF1;CTNNB1;DRD2;AGT;AGTR2;EDN1;EDNRA;EGF;ESR1;FGF1;FGF2;FGFR2;PLXND1;GREM1;GDNF;GLI3;HGF;HOXA11;HOXA13;IHH;IL10;ILK;AR;AREG;KDR;KRAS;TACSTD2;SMAD4;MDK;MET;MMP14;MYC;NOTCH1;NOTCH4;PAK1;PAX2;PDGFA;PGR;WNT4;DLL4;MED1;BCL2;CCL11;SFRP1;SFRP2;BMP4;BMP7;SNAI2;SOX9;SRC;HNF1B;TCF21;TDGF1;TNF;VDR;VEGFA;WT1;PAX8;CASR;NRP1;SLIT2;SEMA3E;HS3ST3B1	4.79737	9.22596e-20
GOBP_ADAPTIVE_THERMOGENESIS	PPARGC1A;DECR1;DIO2;GATM;GJA1;IGF1R;RBPJ;IL4;IL13;IL15;IL18;LEP;LEPR;NOTCH1;OXTR;PRLR;RB1;STAT6;ADAM17;THRA;TLR4;CCR2;VEGFA;TRPV1;CXCR4;IL18R1;HDAC3;ACVR2B;ADIPOQ;CD36	5.57703	9.85989e-20
GOBP_DEVELOPMENT_OF_PRIMARY_SEXUAL_CHARACTERISTICS	BCL2L11;FST;ZFP42;CYP1B1;CYP19A1;ACE;ERCC1;ESR1;FGF9;FOXO3;SIRT1;FSHB;FSHR;NR5A1;GATA3;GATA6;AMH;AMHR2;GNRH1;ANG;HOXA10;HOXA11;IL1A;INHA;INHBA;INSR;AR;KDR;LEP;LHB;LHCGR;SMAD4;MAS1;KITLG;MMP2;MMP14;MSH2;ATM;NOS3;PDGFA;PDGFRA;PDGFRB;PGR;WNT4;RETN;BAX;CCND1;BCL2;REN;BCL2L1;SDC1;SFRP1;SFRP2;BMPR1B;SLIT3;SOD1;SOX9;SOX15;SRC;SRD5A1;SRD5A2;SRY;BRCA2;TCF21;NR2F2;TGFB2;TGFBR1;TLR3;VEGFA;WT1;ZP3;CASP3;UTF1…	4.3567	1.11485e-19
GOBP_LYMPHOCYTE_COSTIMULATION	KLRC4-KLRK1;LILRB2;CCR7;CSK;DPP4;AKT1;KLRK1;CD274;IL4;LGALS1;LYN;PIK3CA;CCL19;CCL21;SRC;VAV1;CARD11;CD86;CD40LG	17.0654	1.42911e-19
GOBP_REGULATION_OF_PROTEIN_SECRETION	DNM1L;CFTR;UCN3;CNR1;DRD2;F2R;F2RL1;FGA;FOXO1;ANKRD1;ANG;GPER1;HIF1A;HLA-DRB1;FOXA2;IFNG;IGF1;APOE;IL1A;IL1B;IL6;IL12B;IL13;LEP;MIR17;MIR30C1;CD200;NOS2;OPRM1;TREM2;KRT20;PPARG;PSMD9;CCL5;SFRP1;TGFB1;TGFB2;TGFB3;TLR2;TLR4;TNF;TRH;VEGFC;EZR;NR0B2;CASR;IRS2;CLOCK	4.15479	1.52685e-19
GOBP_POSITIVE_REGULATION_OF_SMALL_MOLECULE_METABOLIC_PROCESS	MTCO2P12;PPARGC1A;ADM;ENO1;AKT1;FGF1;FOXO1;SIRT1;MTOR;GPER1;ANXA1;HIF1A;IFNG;IGF1;APOE;IL1B;IL4;INSR;LHCGR;ARNT;MIR210;MAS1;NOS1;NOS2;NOS3;P2RY6;TREM2;WNT4;PPARA;PPARG;PSEN1;PTGS2;SRC;STAR;TNF;TWIST1;IRS2;ADIPOQ;CD74	5.75517	1.55207e-19
GOBP_NEGATIVE_REGULATION_OF_INFLAMMATORY_RESPONSE	ADA;CD200R1;SIRPA;MAPK14;CYP19A1;FPR2;GATA3;GBA;GPER1;GSTP1;HCK;HGF;HLA-DRB1;IGF1;APOE;IL2;IL2RA;IL4;IL10;IL12B;IL13;LYN;MIR126;MIR141;MIR142;MIR145;MIR181C;MIR195;MIR20A;MIR204;MIR205;MIR30C2;MIR31;SMAD3;MDK;CD200;NFKB1;NT5E;FOXP3;ENPP3;SERPINF1;TREM2;PPARA;PPARG;PTGER4;MIR488;PTPRC;RB1;CX3CL1;SOD1;SRC;TEK;TNFRSF1A;TNFRSF1B;ZFP36;ADIPOQ;NR1D2	5.06901	1.67919e-19
GOBP_POSITIVE_REGULATION_OF_ALPHA_BETA_T_CELL_ACTIVATION	ADA;CD55;PTPN22;GLI3;ANXA1;HLA-DRB1;IFNG;IHH;IL12B;IL12RB1;IL18;LGALS9;MIR21;MYB;FOXP3;IL23A;PTPRC;CCL19;CCR2;TYK2;CARD11;RUNX1;RUNX3;CD86	10.3239	1.81264e-19
GOBP_POSITIVE_REGULATION_OF_INTERLEUKIN_10_PRODUCTION	F2RL1;CD274;HGF;HMGB1;HSPD1;IL4;IL6;IL12B;IL13;LGALS9;MIR145;IL23A;TREM2;STAT3;TLR2;TLR4;TSLP;CD40LG	20.4272	2.10437e-19
GOBP_POSITIVE_REGULATION_OF_STRESS_ACTIVATED_PROTEIN_KINASE_SIGNALING_CASCADE	RASGRP1;NOD1;CCR7;CRK;CCN2;F2RL1;PLCB1;HMGB1;IGFBP6;IL1A;IL1B;LEP;LYN;MAP2K7;CCL19;CCL21;BMP4;TGFB2;TLR3;TLR4;TNF;VEGFA;WNT7A;AXIN1;FZD7;HAND2;RASSF2	6.27863	2.34428e-19
GOBP_REGULATION_OF_RESPONSE_TO_CYTOKINE_STIMULUS	ADAR;CSF1;EDN1;F2RL1;ANGPT1;GSTP1;HIF1A;TICAM2;IL1R1;IL1RN;IL6;IL7;ARG1;MIR21;MIR27B;MMP12;TREM2;PPARG;MED1;AXL;PTPRC;CCL5;SLIT3;ADAM17;TLR2;TLR4;TNFRSF1A;IL1R2;CXCR4;NLRC5;TSLP;SLIT2;ADIPOQ;CD74	5.10565	2.58626e-19
GOBP_REGIONALIZATION	TSHZ1;CDX1;SEMA3C;CTNNB1;EDN1;MEGF8;EMX2;FGF1;FGF2;FGFR2;DKK1;HEY1;GREM1;GDNF;INTU;GLI1;GLI3;FOXA2;HOXA10;HOXA11;HOXB4;RBPJ;AR;ITGAM;HES5;SMAD2;SMAD3;SMAD4;ATM;NOTCH1;NTF4;PAX2;DLL4;PSEN1;SFRP1;SFRP2;BMP4;BMPR1B;SNAI1;HNF1B;TDGF1;NR2F2;TGFBR1;TP53;C3;WNT7A;WT1;PAX8;AXIN1;NRP1;WNT3A;ACVR2B;GDF3	3.46097	2.81593e-19
GOBP_POSITIVE_REGULATION_OF_INTERLEUKIN_1_PRODUCTION	NOD1;EGR1;F2RL1;HDAC2;HK1;HMGB1;IFNG;IL6;IL16;IL17A;LGALS9;SMAD3;CCL19;STAT3;TLR4;TNF;TYROBP;CD36	10.052	3.23491e-19
GOBP_SKELETAL_SYSTEM_MORPHOGENESIS	CDX1;OSR2;COL1A1;MAPK14;CCN2;CTNNB1;DLX5;MEGF8;FGFR2;GREM1;GLI3;HOXA11;HOXB4;IHH;LTF;SMAD2;SMAD3;MMP2;MMP13;MMP14;PDGFRA;PSEN1;RARB;SFRP1;BMP4;BMP7;BMPR1B;SOX9;STC1;ZEB1;TGFB3;TGFBR1;THRA;TWIST1;WNT7A;HYAL2;SERPINH1;ACVR2B	4.42685	3.49056e-19
GOBP_CANONICAL_WNT_SIGNALING_PATHWAY	CDH3;YAP1;CTHRC1;LRRK2;COL1A1;MAPK14;CTNNB1;DLX5;EDN1;EDNRA;EGF;EGFR;EGR1;FGF2;FGF9;FGFR2;DKK1;FOXO1;FOXO3;GATA3;GREM1;RBMS3;GLI1;GLI3;GSK3B;HDAC1;APOE;IGFBP1;IGFBP6;RBPJ;ILK;MIR145;MIR29C;SMAD3;MDK;NFKB1;NOTCH1;WNT4;PSEN1;PTEN;SDC1;SFRP1;SFRP2;WNK1;SNAI2;SOX2;SOX9;SRC;TGFB1;WNT7A;AXIN1;FZD7;LGR5;WNT3A	3.71665	3.64514e-19
GOBP_HEART_PROCESS	ADA;DNM1L;ABCC9;YAP1;AKAP13;ADM;ADRA1A;CCN2;ACE;DRD2;AGT;HBEGF;AGTR2;EDN1;EDNRA;NEDD4L;MTOR;GATA6;GJA1;GSTM2;IL2;KCNQ1;MIR200C;MDM2;NOS1;NOS3;PIK3CA;PIK3CG;RGS4;S100A1;SLC1A1;SOD1;SRC;STC1;TGFB2;THRA;TNF;UCN;TRPV1;CXCR4;CALCA;CDC42	4.06653	3.94187e-19
GOBP_ACUTE_INFLAMMATORY_RESPONSE	CCR7;CNR1;CRP;AHSG;EPO;F2;F3;FCGR3A;FN1;GATA3;GSTP1;HP;APOA2;IL1A;IL1B;IL4;IL6;CXCR2;MBL2;OGG1;OPRM1;IL22;SERPINA1;PIK3CG;UGT1A1;PTGS2;TACR1;BTK;TNF;C3;VCAM1;TRPV1;ZP3;CD163;PTGES	6.93235	3.95783e-19
GOBP_NEGATIVE_REGULATION_OF_HEMOPOIESIS	CDK6;CEBPA;LILRB1;CTLA4;CTNNB1;ERBB2;FBN1;GATA2;GLI3;TBX21;ANXA1;HLA-G;HMGB1;IAPP;ID2;IHH;IL2;IL4;INHA;INHBA;LTF;LYN;MIR21;MDK;MYC;TNFRSF11B;FOXP3;IL17D;BCL6;SFRP1;BMP4;SNAI2;TLR3;TLR4;RUNX1;RUNX3;ADIPOQ;CD74	6.93235	3.95783e-19
GOBP_REGULATION_OF_FIBROBLAST_PROLIFERATION	CDK4;CDK6;CDKN1A;CTNNB1;AGT;EGFR;ESR1;FN1;GSTP1;IGF1;AQP1;IL13;ITGB3;JUN;LIF;LTA;MIR17;MIF;MYC;NGFR;PDGFA;PDGFRA;PDGFRB;BAX;S100A6;SFRP1;SOD2;TP53;CCNB1;CD74;CDC6	8.62575	4.18478e-19
GOBP_TRANSFORMING_GROWTH_FACTOR_BETA_RECEPTOR_SIGNALING_PATHWAY	PARP1;FBN1;SIRT1;FOS;FSHB;MSTN;AMHR2;HDAC1;HDAC2;HPGD;ITGB1;ITGB8;JUN;LOX;MIR183;MIR21;MIR30A;SMAD2;SMAD3;SMAD4;MIR342;PPARA;PPARG;HTRA1;SRC;STAT3;ADAM17;ZEB1;TGFB1;TGFB1I1;TGFB2;TGFB3;TGFBR1;THBS1;CLDN5;TP53;TET1;AXIN1	4.47151	4.27836e-19
GOBP_POSITIVE_REGULATION_OF_LYMPHOCYTE_MEDIATED_IMMUNITY	KLRC4-KLRK1;RASGRP1;CD226;CD55;KLRK1;CADM1;NCR3;GATA3;TBX21;HLA-B;HLA-DRB1;HLA-G;HSPD1;IL1B;IL1R1;IL2;IL4;IL6;IL12B;IL12RB1;IL18;KIR2DL4;LTA;SH2D1A;MLH1;MSH2;FOXP3;IL23A;TREM2;B2M;PTPRC;PVR;IL21;STAT6;BTK;TGFB1;TNF;C3;VAV1;ZP3;IL18R1	6.69713	4.35771e-19
GOBP_MYELOID_CELL_HOMEOSTASIS	BCL2L11;CDK6;ADAR;MAPK14;CSF1;EPO;ERCC2;ETS1;FOXO3;GATA2;GATA3;TMOD3;ANXA1;HIF1A;HMGB1;ID2;IL6;CXCR2;INHA;INHBA;KCNQ1;ARNT;LYN;KITLG;MYB;FOXP3;KLF13;PIK3CB;PIK3CD;MED1;AXL;B2M;BAX;RB1;BCL6;BMP4;SOD1;STAT3;ADAM17;BTK;THRA;VEGFA;ZFP36;CASP3;ACVR1B;SFXN1	5.23038	4.47375e-19
GOBP_REGULATION_OF_CELL_MORPHOGENESIS	PLXNC1;CIB1;OLFM4;CFL1;CLDN4;CLDN3;CRK;CSF1R;EPHB2;F2;FBLN1;FGA;PLXND1;NEDD4L;FN1;ANXA1;HCK;ILK;ITGB3;KDR;RHOC;RHOG;MIR21;TACSTD2;MDK;RHOF;FGD6;PTPRD;RASA1;CCL2;CCL11;SRC;BRAF;SYT1;VEGFA;EZR;CXCR4;ACTN4;NRP1;CD44;SEMA3E;CDC42	3.70049	4.49459e-19
GOBP_REACTIVE_NITROGEN_SPECIES_METABOLIC_PROCESS	KLRC4-KLRK1;SIRPA;CX3CR1;CYP1B1;AGT;AGTR2;EDN1;AIF1;AKT1;KLRK1;IFNG;IL1B;IL10;INSR;MIR132;SMAD3;NOS1;NOS2;NOS3;PTGS2;SOD2;TSPO;TLR2;TLR4;TNF;TRPV1;CD36;CD47	8.96314	4.80085e-19
GOBP_REGULATION_OF_CD4_POSITIVE_ALPHA_BETA_T_CELL_ACTIVATION	CD55;IL27;GATA3;CD274;TBX21;ANXA1;HLA-DRB1;HMGB1;IFNG;IL2;IL2RA;IL4;IL12B;IL12RB1;IL18;LGALS9;MIR21;MYB;FOXP3;IL23A;BCL6;CCL19;CARD11;RUNX1;RUNX3;CD86	9.34883	5.33105e-19
GOBP_REGULATION_OF_SMALL_GTPASE_MEDIATED_SIGNAL_TRANSDUCTION	RASGRP1;AKAP13;CRK;CSF1;ADRA1A;EPHB2;EPO;F2R;F2RL1;FOXM1;NUP62;IGF1;APOE;ITGAV;ITGB1;KRAS;STMN1;MET;KITLG;NGF;NOTCH1;PDGFRB;PIK3CB;PIK3CG;RHOF;RAF1;RASA1;BCL6;SRC;TGFB2;VAV1;ARHGAP28;NRP1;SQSTM1;SLIT2	3.71797	5.90668e-19
GOBP_CELL_CELL_JUNCTION_ORGANIZATION	CLDN4;CLDN3;CLDN7;CSF1R;CSK;CTNNB1;GPBAR1;ACE;AGT;EPHB2;F2R;F2RL1;GJA1;GJB2;IL1B;IL17A;RHOC;MIR142;SMAD3;CLDN11;PRKCA;NECTIN1;ACTB;ROCK1;SNAI2;SNAI1;FSCN1;SRC;TGFB1;TGFB2;TGFB3;TGFBR1;CLDN5;TNF;VEGFA;CLDN1;CDC42;CDH1	4.56819	6.33044e-19
GOBP_TELENCEPHALON_DEVELOPMENT	CDK6;LRRK2;CRK;CSF1R;CTNNB1;ARX;DLX5;DRD2;EGFR;EMX2;EPHB2;EZH2;PLCB1;FOXP1;GLI3;GSK3B;H2AX;HDAC1;HIF1A;HPRT1;HSD3B1;HSD3B2;ID2;IGF1R;AQP1;INHBA;HES5;LAMB1;MAS1;MDK;NTRK2;OXTR;PSEN1;PTEN;BAX;RARB;CXCL12;SLC2A1;BMP4;SLIT3;SRD5A1;SRD5A2;XRCC1;CXCR4;CASP3;WNT3A;SLIT2	4.07393	6.34593e-19
GOBP_CARTILAGE_DEVELOPMENT	OSR2;COL1A1;MAPK14;CCN2;CTNNB1;EDN1;FGF2;FGF9;GREM1;GLI3;HIF1A;HOXA11;CCN1;IHH;ITGB8;HES5;LEP;MIR21;SMAD3;MDK;MMP13;MAPK3;SULF2;RARB;RB1;SFRP2;BMP4;BMP7;BMPR1B;SNAI2;SNAI1;SOX9;STC1;ZEB1;TGFB1;TGFBI;TGFBR1;THRA;TIMP1;WNT7A;HMGA2;RUNX1;RUNX3;HYAL2;SERPINH1;HAND2;CD44	4.71011	6.94837e-19
GOBP_SYNAPSE_ORGANIZATION	LILRB2;PDLIM5;CFL1;LRRK2;MAPK14;CTNNB1;CX3CR1;DRD2;EPHB2;ERBB2;F2R;DKK1;PLXND1;GDNF;TNC;APOE;IGF1R;IL1RAP;IL10;INSR;ITGAM;L1CAM;MECP2;NTRK2;NTRK3;OXTR;TREM2;SYBU;PSEN1;PTEN;PTPRD;NECTIN1;ACTB;BDNF;CX3CL1;SLC1A1;SNCG;TLR2;TNF;C3;WNT7A;YWHAZ;SPARCL1;ACTN1;NRP1;WNT3A;SEMA3E;CDC42;CDH1	3.14242	7.20253e-19
GOBP_NEGATIVE_REGULATION_OF_KINASE_ACTIVITY	CDKN1A;CDKN1B;CDKN2A;ADAR;CEBPA;CSK;AGT;DUSP1;EPHB2;AKT1;SIRT1;NUP62;PTPN22;GBA;MSTN;PDCD4;GSTP1;FOXA2;IFNG;APOE;IL1B;LYN;MIR20A;MIR34A;PIK3CB;PLK1;ERRFI1;PPARG;PSEN1;PTEN;PTPRC;RB1;SFRP1;SFRP2;BMP4;BMP7;NR2F2;THY1;UCHL1;CASP3;IRS2;HYAL2;ADIPOQ	4.21731	7.94475e-19
GOBP_CELLULAR_RESPONSE_TO_OXIDATIVE_STRESS	PPARGC1A;CHUK;LRRK2;SIRPA;PARP1;CTNNB1;CYP1B1;DAPK1;EDN1;EDNRA;EGFR;AIF1;AKT1;EZH2;FANCD2;FOXO1;FOXO3;SIRT1;FOS;GBA;GJB2;FOXP1;ANXA1;HDAC2;HGF;HIF1A;APEX1;IL6;AQP1;IL10;JUN;ARG1;ARNT;MIRLET7B;MIR132;MIR17;MIR195;MIR21;MIR34A;MET;MMP2;MMP3;MMP9;MPO;NFE2L2;NOS3;PAX2;PCNA;PDGFRA;TREM2;AXL;MAPK1;MAPK3;MAPK8;BCL2;RELA;SLC1A1;BMP7;SOD1;SOD2;SRC;STAT6;BTK;TLR4;TNF;TP53;TXN;CAT;AKR1C3;BECN1;CD36;CDK1	3.81	8.63406e-19
GOBP_APPENDAGE_DEVELOPMENT	BCL2L11;SEMA3C;OSR2;CRABP2;CTNNB1;DLX5;MEGF8;FGF9;FGFR2;DKK1;GREM1;INTU;GLI3;HDAC1;HDAC2;HOXA10;HOXA11;HOXA13;IHH;SMAD4;NOTCH1;MED1;PSEN1;SALL4;BAX;RARB;SFRP2;BMP4;BMP7;SOX9;TGFB2;TWIST1;WNT7A;HAND2	5.01628	9.80237e-19
GOBP_ANTIGEN_PROCESSING_AND_PRESENTATION_OF_PEPTIDE_ANTIGEN	ACE;PDIA3;HLA-B;HLA-C;HLA-DPB1;HLA-DQB1;HLA-DRB1;HLA-G;TREM2;B2M;CD74	11.2879	9.816e-19
GOBP_MUSCLE_ORGAN_DEVELOPMENT	CREB1;MAPK14;CTNNB1;DDX5;HBEGF;S1PR1;EDNRA;EGR1;FGFR2;SIRT1;FOS;MSTN;ANKRD1;NR4A1;IGF1;RBPJ;CXCL10;ITGB1;KRAS;LIF;LOX;MIR143;MIR145;MIR195;SMAD3;SMAD4;NOTCH1;DLL4;MED1;RBFOX1;RB1;BCL2;BMP4;SOX15;TAGLN;TCF21;NR2F2;TGFB1;TGFB2;TGFBR1;TWIST1;UTRN;WT1;XBP1;WNT3A;COPS2;IGSF8;HDAC9;NR1D2	3.46863	9.90689e-19
GOBP_IMPORT_INTO_CELL	ABCC9;DRD2;AGT;AKT1;SLC7A8;GDNF;IFNG;ITGB1;ITGB3;KCNQ1;ARG1;MIR200C;MIR210;NOS1;TREM2;PSEN1;RGS4;ACTB;SLC1A1;WNK1;SLC2A1;SLC2A3;SLC6A4;THBS1;TNF;TRPV1;SLC38A1;IRS2;MS4A1;CD36	4.08159	1.02136e-18
GOBP_POSITIVE_REGULATION_OF_ESTABLISHMENT_OF_PROTEIN_LOCALIZATION	DNM1L;CIB1;CFTR;UCN3;MAPK14;ERBB2;F2RL1;FGA;ANKRD1;GLI3;ANG;GPER1;GSK3B;HIF1A;HLA-DRB1;IFNG;IGF1;IL1A;IL1B;IL13;ITGAM;LEP;SMAD3;TREM2;PPARG;VPS11;MAPK8;PSEN1;PSMD9;PTGS2;SRC;TGFB1;TGFB2;TGFB3;TLR2;TLR4;TNF;TRH;VEGFC;EZR;NR0B2;CASR;IRS2;HYAL2;HDAC3;CDK1;CDH1	3.66927	1.10403e-18
GOBP_STEROID_METABOLIC_PROCESS	CEBPA;CETP;CFTR;CYP2R1;ADM;CRH;CYP1A1;CYP1A2;CYP1B1;CYP2B6;CYP2C19;CYP3A4;TTC39B;CYP11A1;CYP17A1;CYP19A1;CYP26A1;AKR1C1;AKR1C2;EGR1;ESR1;FGF1;AKR1B1;SIRT1;FSHB;NR5A2;NR5A1;GBA;GC;NR3C1;HSD3B1;HSD3B2;HSD11B2;HSD17B1;HSD17B3;HSD17B2;APOA2;IFNG;APOE;IGF1R;IGFBP7;IL1A;IL4;LBR;LEP;LEPR;LHB;LHCGR;LIPC;LIPE;MIR30C1;MIR33A;STS;MECP2;NFKB1;HSD17B7;PDGFRA;WNT4;PON1;UGT2B28;UGT1A1;MED1;PRLR;SNAI2;SNAI1;SOD1…	3.59142	1.16496e-18
GOBP_ANATOMICAL_STRUCTURE_MATURATION	CDH3;CEBPA;CFTR;LRRK2;CTNNB1;CX3CR1;S1PR1;EDN1;EDNRA;EPO;ERCC2;FOXO3;AKR1B1;GATA2;GATA3;GBA;GREM1;GH1;GHRHR;ANG;HIF1A;IGF1;RBPJ;IHH;IL15;KDR;HES5;LEP;LTF;MECP2;MMP2;PAEP;PAX2;PGR;PPARG;PPP2R1A;AXL;IL21;RB1;BCL2;REN;CCL19;CCL21;CX3CL1;BRCA2;BTK;TGFB2;C3;VEGFA	4.11246	1.2971e-18
GOBP_REGULATION_OF_MYELOID_LEUKOCYTE_DIFFERENTIATION	CDK6;LILRB1;CCR1;CREB1;CSF1;IL34;CTNNB1;FBN1;FOS;MTOR;FSHB;GATA2;FOXP1;HLA-DRB1;IAPP;ID2;IFNG;IL4;IL12B;IL17A;INHA;INHBA;LIF;LTF;LYN;MIR145;KITLG;MYC;TNFRSF11B;IL23A;PF4;TREM2;PRKCA;RB1;SFRP1;TGFB1;KLF10;TLR3;TLR4;TNF;TYROBP;DCSTAMP;RUNX1;ADIPOQ;CD74;RASSF2	6.43284	1.40728e-18
GOBP_FIBROBLAST_PROLIFERATION	CDK4;CDK6;CDKN1A;CKS1B;CTNNB1;AGT;EGFR;ESR1;FN1;GSTP1;IGF1;AQP1;IL13;ITGB3;JUN;LIF;LTA;MIR17;MIF;MYC;NGFR;PDGFA;PDGFRA;PDGFRB;BAX;S100A6;SFRP1;SOD2;TP53;CCNB1;CD74;CDK1;CDC6	7.31315	1.41417e-18
GOBP_NEGATIVE_REGULATION_OF_PROTEOLYSIS	LRRK2;CPB2;AGT;AHSG;AKT1;F2;ANXA2;HGF;NR4A1;BIRC2;BIRC3;BIRC5;IL9;AQP1;IL10;USP17L2;KNG1;LPA;LTF;MIRLET7B;MIR126;MIR17;MIR195;MIR29C;MMP9;NGF;SERPINE1;SERPINB2;PAX2;SERPINF1;SERPINA1;PLAU;PSEN1;PTGS2;RAF1;RARRES1;ROCK1;SFRP2;SLPI;SMARCC1;SRC;THBS1;TIMP1;TIMP2;TIMP3;TIMP4;SERPING1;TNF;TP53;C3;C5;VEGFA;VTN;IL1R2;BAG6;RNF34;SERPINH1;CD44	3.44218	1.45356e-18
GOBP_PATTERN_SPECIFICATION_PROCESS	TSHZ1;CDX1;FST;SEMA3C;CTNNB1;EDN1;MEGF8;EMX2;FGF1;FGF2;FGFR2;DKK1;HEY1;GREM1;GDNF;INTU;GLI1;GLI3;HIF1A;FOXA2;HOXA10;HOXA11;HOXB4;RBPJ;IHH;AR;ITGAM;HES5;SMAD2;SMAD3;SMAD4;ATM;NOTCH1;NTF4;PAX2;DLL4;PSEN1;SFRP1;SFRP2;BMP4;BMP7;BMPR1B;SNAI1;STC1;HNF1B;ZEB1;TDGF1;NR2F2;TGFBR1;TP53;C3;WNT7A;WT1;PAX8;AXIN1;NRP1;WNT3A;ACVR2B;HAND2;GDF3	2.99933	1.49415e-18
GOBP_BONE_DEVELOPMENT	CDX1;LILRB1;AKAP13;OSR2;COL1A1;MAPK14;DLX5;MEGF8;FBN1;FGFR2;GREM1;GH1;GJA1;FOXP1;GLI3;ANXA2;HOXA11;HOXB4;HSD17B1;IGF1;IHH;KDR;LEP;LEPR;LOX;LTF;MMP13;MMP14;MED1;BNC2;SULF2;PTGER4;PTPRC;RARB;BMP4;BMPR1B;SOX9;SRC;SRD5A1;SRD5A2;STC1;TGFB3;TP53;TWIST1;TYROBP;SERPINH1	4.26534	1.59322e-18
GOBP_NEUROINFLAMMATORY_RESPONSE	LRRK2;CD200R1;CX3CR1;AIF1;IFNG;IFNGR1;IGF1;IL1B;IL4;IL6;IL13;IL18;ITGAM;ITGB1;JUN;MIR142;MIR181C;MIR195;MMP3;MMP9;CD200;ATM;TREM2;PSEN1;PTGS2;PTPRC;CX3CL1;TLR2;TLR3;TNF;TNFRSF1B;TYROBP;TRPV1;IL33	9.77012	1.83233e-18
GOBP_REGULATION_OF_CALCIUM_ION_TRANSPORT	LILRB2;LILRB1;FCRL3;CCR1;CRHR1;CTNNB1;ACE;DRD2;AGT;EGF;EPO;F2;F2R;GPER1;REM1;GSTM2;IL13;IL16;CXCL10;ITGB3;LGALS3;LHCGR;LYN;MIR200C;MIR21;MIR34A;CXCL9;NOS1;NOS3;P2RX3;P2RX5;P2RY6;PDGFRB;PIK3CG;PTGS2;BAX;BCL2;RGS4;CCL2;CCL5;CX3CL1;CXCL12;STC1;TSPO;THY1;TRPC6;UCN;CXCR4;CASR;STC2;CD19;MS4A1	3.91982	1.96096e-18
GOBP_REGENERATION	CDKN1A;CDKN1B;YAP1;ADM;CPB2;ACE;EZH2;MSTN;GLI1;GLI3;ANGPT2;ANXA1;HGF;APOA2;TNC;IGF1;IGF1R;IGFBP1;IHH;IL6;IL10;JUN;MDK;MMP2;NINJ1;NOTCH1;PCNA;PGF;PLG;UGT1A1;MED1;AXL;MAP2K1;PTEN;PTN;CCND1;BCL2;CXCL12;SOX2;SOX15;SPP1;BRAF;TSPO;THY1;TNF;VTN;WNT7A;FZD7;NR0B2;RUNX1;CLDN1;CDK1	4.72499	2.26214e-18
GOBP_EMBRYONIC_ORGAN_MORPHOGENESIS	TSHZ1;YAP1;CTHRC1;OSR2;CTNNB1;DLX5;EDN1;EDNRA;MEGF8;EPHB2;FBN1;FGF9;FGFR2;GATA2;GATA3;GLI1;GLI3;HIF1A;HOXA11;HOXB4;ID2;IHH;KCNQ1;SMAD2;SMAD3;MMP14;NOTCH1;PAX2;PDGFRA;MAPK1;MAPK3;PSEN1;RARB;BMP4;BMP7;SOD1;SOX9;HNF1B;ZEB1;TCF21;TGFB3;TGFBR1;TWIST1;PAX8;WNT3A;HAND2	3.72226	2.51215e-18
GOBP_NEGATIVE_REGULATION_OF_APOPTOTIC_SIGNALING_PATHWAY	YAP1;LRRK2;CSF2;CTH;CTNNB1;CX3CR1;ENO1;EPO;AKT1;FGA;SIRT1;GDNF;GSK3B;GSTP1;HDAC1;HGF;HIF1A;ICAM1;IGF1;IL1A;IL1B;IL4;IL7;IL9;AR;ITGAV;LGALS3;MIR132;MIR17;MIR21;MIR210;MDM2;MIF;MMP9;MUC1;NFE2L2;NOS3;SERPINE1;PF4;PIK3CB;WNT4;PSEN1;ACKR3;PSMD10;PTGS2;BAX;RAF1;RB1;BCL2;RELA;BCL2L1;BDNF;CX3CL1;CXCL12;SFRP2;BMP4;SNAI2;SNAI1;SOD2;SRC;BRCA1;TERT;TGFBR1;THBS1;TNF;TPT1;XBP1;RNF34;PEA15;NRP1;CREB3L1;CD44;CD74	4.21408	2.60617e-18
GOBP_NEGATIVE_REGULATION_OF_WOUND_HEALING	CPB2;CLDN3;CRK;EDN1;F2;FGA;FGF2;ANXA2;APOE;KNG1;MIR200B;MIR34A;SMAD3;NOS3;SERPINE1;SERPINB2;PDGFA;PDGFRA;PLAU;PLG;WNT4;PTEN;THBS1;SERPING1;TNF;VTN	9.09373	2.90801e-18
GOBP_MULTICELLULAR_ORGANISM_REPRODUCTION	ADA;BCL2L11;FST;CIB1;KHDRBS1;CFTR;LRRK2;CNR1;PARP1;CTNNB1;CYP1A1;CYP1B1;ACE;DNMT3A;AGRP;EDN1;EDNRA;EGR1;EPOR;ERCC1;AKT1;ESR1;FANCD2;FOXO3;SIRT1;CADM1;MTOR;FSHB;FSHR;NR5A1;GALNT3;NECTIN3;MSTN;AMH;GHRHR;GJA1;GJB2;HPGDS;GLI1;ANG;ANGPT2;GPX4;NR3C1;MSH6;DNMT3L;ANXA1;H2AX;HDAC2;HOXA10;HOXA11;HPGD;BIRC3;IGF1;IGF1R;IHH;IL1A;INHBA;AR;ITGB1;KISS1;ARG1;LEP;LGALS9;LHCGR;LIF;SMAD4;MAS1;MDK;MLH1;MMP2;MSH2;ATM;…	2.30135	3.18381e-18
GOBP_POSITIVE_REGULATION_OF_PHAGOCYTOSIS	SIRPA;AHSG;F2RL1;FPR2;GATA2;APOA2;IFNG;IL1B;IL2RB;IL15;ITGA2;MIR17;MIR183;MIR20A;MBL2;TREM2;PTPRC;CCL2;SOD1;BTK;TNF;C3;CD36;CD47	9.51936	3.18642e-18
GOBP_POSITIVE_REGULATION_OF_INNATE_IMMUNE_RESPONSE	KLRC4-KLRK1;RASGRP1;CD226;KLRK1;FPR2;CADM1;NCR3;HCK;HLA-G;HMGB1;IL12B;KIR2DL4;LYN;SH2D1A;MBL2;MMP12;PAK1;MED1;PVR;IL21;CCL5;SRC;TLR4;TYROBP;VAV1;NLRC5	5.59756	3.85441e-18
GOBP_CELLULAR_RESPONSE_TO_EXTRACELLULAR_STIMULUS	CDKN1A;POSTN;UCN3;LRRK2;COL1A1;COMT;AIF1;ERCC6;ALB;FOXO1;FOXO3;SIRT1;FOS;MTOR;GBA;FOXA2;IGF1R;FAS;AQP2;IL15;LEP;LYN;NFE2L2;WNT4;KRT20;PPARA;MED1;AXL;MAPK1;MAPK3;MAPK8;PTPRC;BCL2;RXRA;SFRP1;SFRP2;SLC2A1;SNAI2;SRD5A1;KLF10;TP53;USF2;VCAM1;VDR;XBP1;MAP1LC3B;CASR;AKR1C3;NCOA1;BECN1;UCN2;CD68	3.9506	4.08077e-18
GOBP_POSITIVE_REGULATION_OF_CELL_SUBSTRATE_ADHESION	CDK6;CIB1;AGR2;OLFM4;CCR7;CRK;CSF1;CCDC80;FGA;FN1;ALOX15;ABI3BP;POLDIP2;GSK3B;CCN1;ILK;ITGA5;ITGB3;KDR;SMAD3;MDK;WNT4;ROCK1;CCL21;CCL25;CX3CL1;SDC4;SFRP1;BRAF;TEK;THY1;UTRN;VEGFA;VTN;NDNF;SKAP1;NRP1;CD36;CDC42	6.18839	4.34826e-18
GOBP_EPIDERMIS_DEVELOPMENT	CDH3;YAP1;FST;TXNIP;HPSE;CRABP2;CCN2;CTNNB1;DLX3;EGFR;ERCC2;EZH2;FGF2;FGFR2;DKK1;GATA6;INTU;GLI1;ANXA1;HDAC1;HDAC2;HLA-DRB1;RBPJ;IL1A;INHBA;INSR;KCNQ1;HES5;LAMC2;SMAD4;STS;NGFR;NOTCH1;YBX1;NTF4;PDGFA;ERRFI1;PPARA;MED1;MAP2K1;BCL2;RELA;ROCK1;BMP4;SNAI1;SOD1;SOX9;TFDP1;TGFB2;TNF;VDR;ZFP36;CASP3;LGR5;AKR1C3;ACVR1B;GDF3	3.33115	4.81852e-18
GOBP_T_CELL_DIFFERENTIATION_INVOLVED_IN_IMMUNE_RESPONSE	IL27;MTOR;GATA3;FOXP1;TBX21;ANXA1;HLA-DRB1;HMGB1;IFNG;IL2;IL4;IL6;IL12B;IL12RB1;IL18;LGALS9;MIR21;MYB;FOXP3;IL23A;PTGER4;IL21;BCL6;CCL19;STAT3;STAT6;IL18R1;CD86	8.88203	4.89631e-18
GOBP_MUSCLE_CONTRACTION	ADA;ABCC9;MYL9;UTS2;CHRM3;LTB4R;ADRA1A;CCN2;ADRA2B;DRD2;AGT;EDN1;EDNRA;ENO1;F2R;NEDD4L;MTOR;LMOD1;GDNF;GJA1;GPER1;GSTM2;TMOD3;NR4A1;ITGA2;KCNQ1;MIR143;MIR145;MIR200C;MIR21;NOS1;OXTR;P2RX3;PIK3CA;PIK3CG;SULF2;PTGS2;ACTA2;ROCK1;SOD1;STC1;TACR1;TNF;TPM3;UCN;UTRN;TRPV1;CXCR4;CALCA;CALD1	3.38784	5.01489e-18
GOBP_PROTEIN_KINASE_B_SIGNALING	PDCD6;CIB1;HPSE;CCR7;CSF3;CX3CR1;AKR1C2;DRD2;HBEGF;EGF;EGFR;AKT1;F3;FGF2;SIRT1;MTOR;GATA3;MSTN;ANGPT1;GPER1;HLA-G;IAPP;IGF1;IGF1R;IL1B;IL18;ILK;INSR;ITGB1;KDR;LEP;LOX;MIR126;MIR132;MIR143;MIR145;MIR20A;MIR200C;MIR21;MIR29C;MIR34A;MET;MIR342;MST1R;NTRK2;NTRK3;MIR375;PAX2;PDGFA;PIK3CA;PIK3CB;PIK3CD;PIK3CG;PPARA;AXL;MYDGF;PTEN;MIR451A;CCL2;CCL5;CCL19;CCL21;CX3CL1;SOX9;SRC;TEK;TGFB1;TGFBR1;THBS1;TNF;…	4.33167	5.06589e-18
GOBP_POSITIVE_REGULATION_OF_EPITHELIAL_CELL_PROLIFERATION	CDH3;PDCD6;YAP1;OSR2;CTNNB1;GPBAR1;DLX5;AGTR1;EGF;EGFR;ERBB2;AKT1;F3;FGF1;FGF2;FGF9;FGFR2;SIRT1;GATA2;ANG;HIF1A;HMGB1;NR4A1;IGF1;RBPJ;IHH;IL10;AR;ITGB3;JUN;AREG;KDR;ARG1;LAMB1;ARNT;MIRLET7B;MIR10B;MIR126;MIR132;MIR21;MIR27B;MDK;MMP12;MIR135B;MYC;NME1;NOTCH1;NRAS;PAX2;PGF;PIK3CD;MED1;PRKCA;MYDGF;HTRA1;MIR503;PTN;CCND1;CCL11;CXCL12;SFRP1;BMP4;SOX9;STAT3;ADAM17;TACR1;BTK;TEK;TGFBR1;TNF;TWIST1;VEGFA;…	4.26357	5.22625e-18
GOBP_REGULATION_OF_COAGULATION	HPSE;CPB2;EDN1;EPHB2;F2;F2R;F2RL1;F3;FGA;ANXA2;FOXA2;APOE;KNG1;NFE2L2;NOS3;SERPINE1;SERPINB2;PDGFA;PDGFRA;PLAU;PLG;PSEN1;THBS1;SERPING1;VTN;CD36	9.28115	5.47569e-18
GOBP_REGULATION_OF_PROTEIN_BINDING	CDKN1A;CTHRC1;LRRK2;CRK;CRMP1;CSF3;ACE;AKT1;DKK1;PLXND1;POLDIP2;ANGPT1;GSK3B;ANXA2;IFIT1;APOE;IL10;LOX;MIR148A;MIR27B;MAP2;MMP9;PLK1;PPARA;MAPK3;MAPK8;PSEN1;B2M;BAX;ACTB;ROCK1;BDNF;BMP4;SLPI;SRC;TERT;TGFBR1;CLDN5;VTN;NRP1;WNT3A;ADIPOQ;CDC42	4.53282	5.58516e-18
GOBP_REGULATION_OF_PROTEIN_CONTAINING_COMPLEX_ASSEMBLY	BCL2L11;CDKN1B;CXCL13;PRRT2;CCR7;CLDN7;PARP1;CSF2;CSF3;ESR1;FKBP4;DKK1;ALOX15;MTOR;LMOD1;GBA;GSK3B;TMOD3;HCK;HMGB1;BIRC2;IAPP;IFNG;APOE;RHOC;STMN1;LGALS3;MIR17;MIR214;MAP2;MECP2;MET;MMP1;MMP3;ATM;PAK1;TREM2;VPS11;PTGER4;BAX;RAF1;RASA1;RB1;CCL11;CCL21;FSCN1;SOX9;SRC;TERF1;TGFB1;THRA;TLR4;TNF;TP53;VEGFA;ARHGAP28;SKAP1;SLIT2;CD36;CDC42	3.1391	5.61065e-18
GOBP_CELL_ADHESION_MEDIATED_BY_INTEGRIN	ADA;CIB1;CXCL13;CRK;CYP1B1;DPP4;FBN1;ICAM1;ITGA2;ITGA5;ITGAM;ITGAV;ITGB1;ITGB3;ITGB8;LIF;LYN;MUC1;SERPINE1;PIK3CG;PLAU;CCL5;CCL21;SFRP2;WNK1;SNAI2;ADAM17;TGFB2;VTN;SKAP1	8.06585	5.73621e-18
GOBP_INTRINSIC_APOPTOTIC_SIGNALING_PATHWAY	BCL2L11;DNM1L;CDKN1A;LRRK2;PARP1;CYP1B1;DDX5;ENO1;EPO;AKT1;ERCC6;SIRT1;DAPK2;MSH6;HDAC1;HIF1A;MIR132;MIR17;MIR21;MIR27B;MDM2;MIF;MLH1;MMP9;MSH2;MUC1;MYC;ATM;NFE2L2;PIK3CB;TREM2;ACKR3;PTGS2;BAX;BCL2;BCL2L1;CXCL12;SFRP2;SNAI2;SNAI1;SOD1;SOD2;SRC;BRCA1;BRCA2;TNF;TNFRSF1A;TNFRSF1B;TP53;TPT1;XBP1;BAG6;CASP3;BECN1;CREB3L1;CD44;CD74	3.65492	5.77904e-18
GOBP_RESPONSE_TO_FATTY_ACID	CDK4;CCN2;AKR1C1;AKR1C2;EDN1;FOXO1;FOXO3;PLCB1;PIK3CA;PON1;PPP5C;PTGS2;SOX9;SRC;TLR2;CAT;AKR1C3;CLDN1;ADIPOQ;CD36	10.9429	5.88891e-18
GOBP_REGULATION_OF_MYELOID_CELL_DIFFERENTIATION	CDK6;CIB1;LILRB1;H4-16;CCR1;CREB1;MAPK14;CSF1;CSF3;IL34;CTNNB1;ETS1;FBN1;FOXO3;FOS;MTOR;FSHB;GABPA;GATA2;FOXP1;HIF1A;HLA-DRB1;IAPP;ID2;IFNG;IL4;IL12B;IL17A;INHA;INHBA;LIF;LOX;ARNT;LTF;LYN;MIR145;KITLG;MYB;MYC;NFKBIA;TNFRSF11B;IL23A;KLF13;PF4;TREM2;MED1;H4C15;PRKCA;B2M;RB1;SFRP1;STAT3;TGFB1;KLF10;TLR3;TLR4;TNF;TYROBP;ZFP36;DCSTAMP;H4C9;H4C1;H4C4;H4C6;H4C12;H4C11;H4C3;H4C8;H4C2;H4C5;H4C13;H4C14;RUN…	4.37507	6.26898e-18
GOBP_POSITIVE_REGULATION_OF_NEUROGENESIS	PLXNC1;CRABP2;IL34;CTNNB1;CX3CR1;ACE;DRD2;MEGF8;EPHB2;FGF2;PLXND1;FN1;DICER1;LPAR3;MTOR;GLI3;GPER1;HDAC1;HDAC2;HIF1A;ID2;IFNG;IL1B;IL6;ITGB1;KRAS;L1CAM;LIF;LIMK1;LTA;LYN;MIR142;MDK;MECP2;MME;NGF;NOTCH1;NTRK2;OPRM1;SERPINF1;MAP2K1;PTN;PTPRD;BDNF;CX3CL1;CXCL12;BRAF;TGFB1;TSPO;TLR2;TNF;TNFRSF1B;VEGFA;VEGFC;CXCR4;NRP1;WNT3A;IL33;SLIT2	4.17425	6.79612e-18
GOBP_B_CELL_DIFFERENTIATION	ADA;FCRL3;DOCK11;EZH2;ID2;IFNA1;IFNA13;RBPJ;IL2;IL4;IL6;IL7;IL9;IL10;IL11;INHA;INHBA;ITGB1;LGALS1;MMP14;MSH2;ATM;PIK3CD;PTPRC;BAX;IL21;BCL2;BCL6;SFRP1;DCLRE1C;ADAM17;TCF3;BTK;TP53;VCAM1;XBP1;CARD11;CD19;MS4A1;CD40LG;CD79A;HDAC9	5.37158	6.82628e-18
GOBP_REGULATION_OF_BLOOD_PRESSURE	ABCC9;UTS2;CNR1;ADM;ADRA1A;ADRA2B;ACE;DRD2;AGT;AGTR1;AGTR2;EDN1;EDNRA;F2R;F2RL1;HSD11B2;ID2;AR;KCNQ1;LEP;MIR17;MIR27B;SMAD3;MECP2;NOS1;NOS2;NOS3;OXTR;PPARA;PPARG;PTGS2;ACTA2;REN;WNK1;SOD1;SOD2;BRS3;TACR1;NR2F2;TNF;UCN;VEGFC;TRPV1;CALCA;ADIPOQ	4.64368	8.13371e-18
GOBP_RESPONSE_TO_TOXIC_SUBSTANCE	ABCB6;CYP1A1;CYP1B1;DNMT3A;DRD2;AHR;ERCC6;ALB;SLC7A8;FOS;GATA6;GPX3;GPX4;GSTM1;GSTM2;GSTP1;GSTT1;HP;APOE;GSTK1;ARG1;LYN;MIR21;MAOB;MPO;NFE2L2;NOS3;PDGFRB;PON1;PTGS2;MIR451A;BAX;BCL2;CCL5;SDC1;SLC6A4;BMP7;SOD1;SOD2;SRD5A1;TLR2;TNF;TXN;CAT;CLDN1;CD36;PTGES;CDK1;CDH1	3.9848	8.46001e-18
GOBP_FORMATION_OF_PRIMARY_GERM_LAYER	CTNNB1;DUSP1;DUSP2;FGFR2;DKK1;FN1;GATA6;GJA1;HOXA11;INHBA;ITGA2;ITGA5;ITGAV;ITGB1;ITGB3;LAMB1;MIR145;MIR200C;SMAD2;SMAD3;MMP2;MMP9;MMP14;PAX2;POU5F1;MAP2K1;SFRP2;BMP4;BMP7;SNAI1;SOX2;HNF1B;VTN;NANOG;HMGA2;AXIN1;FZD7;WNT3A	6.03539	9.01287e-18
GOBP_ORGANOPHOSPHATE_BIOSYNTHETIC_PROCESS	ADA;MTCO2P12;PPARGC1A;PARP1;ENO1;FGF2;ALOX15;GPER1;ACACA;HPRT1;APOA2;IL4;IMPA2;IDO1;LHCGR;MIR30C1;MAS1;ATM;NME1;NOS1;NOS2;NOS3;P2RY6;PDGFA;PIK3CA;PIK3CB;PIK3CD;PIK3CG;TREM2;PPARA;PPT1;PTEN;TGFB1;BECN1;TECR	2.65011	9.02345e-18
GOBP_NEPHRON_DEVELOPMENT	YAP1;CTNNB1;AGT;AGTR2;EDNRA;EGR1;FGF1;FGF2;GATA3;GREM1;GDNF;GLI3;ANGPT1;ANGPT2;HOXA11;AQP1;ILK;ITGB3;HES5;LIF;TACSTD2;SMAD4;MYC;NOTCH1;PAX2;PDGFA;PDGFRA;PDGFRB;WNT4;SULF2;ACTA2;BCL2;BMP4;BMP7;SOX9;HNF1B;TCF21;TEK;VEGFA;WT1;PAX8;PROM1;ADIPOQ;HS3ST3B1	5.31821	9.38007e-18
GOBP_POSITIVE_REGULATION_OF_INTERLEUKIN_12_PRODUCTION	CCR7;MAPK14;PLCB1;HLA-G;HMGB1;HSPD1;IFNG;IL12B;IL16;IL17A;IDO1;LEP;LGALS9;MDK;IL23A;RELA;CCL19;TLR2;TLR3;TLR4;CD36;CD40LG	17.1988	9.70926e-18
GOBP_CELL_FATE_COMMITMENT	CTNNB1;ARX;EDN1;EDNRA;FGF2;FGFR2;DKK1;MTOR;GATA2;GATA3;GATA6;GLI3;TBX21;HDAC1;HDAC2;FOXA2;HOXA11;HOXA13;ID2;RBPJ;IHH;IL6;IL7;IL12B;IL12RB1;AR;ITGB1;KDR;HES5;SMAD2;SMAD4;NOTCH1;NOTCH4;NTF4;NTRK3;PAX2;FOXP3;IL23A;WNT4;DLL4;POU5F1;PPARG;PSEN1;BCL2;SFRP1;SFRP2;BMP4;SOX2;SOX9;BRAF;STAT3;STAT6;HNF1B;TCF3;NR2F2;TGFB1I1;TGFBR1;TP53;WNT7A;WT1;NANOG;FZD7;CASP3;NRP1;WNT3A;MTA1;MTA2;GDF3;CDC42	3.72711	1.06778e-17
GOBP_ENTRY_INTO_HOST	CCR5;CD55;DPP4;AGTR1;EGFR;HLA-DRB1;HMGB1;ICAM1;CXCL8;INSR;ITGA2;ITGA5;ITGAV;ITGB1;ITGB3;LGALS1;LGALS9;MRC1;NCAM1;SLC52A1;AXL;PVR;NECTIN1;SRC;BSG;CXCR4;NECTIN4;HYAL2;NRP1;CLDN1;CD86;CD74;CDK1	5.16986	1.14633e-17
GOBP_REGULATION_OF_LIPID_BIOSYNTHETIC_PROCESS	CDK4;ADM;CREB1;EGR1;AKT1;FGF1;SIRT1;MTOR;FSHB;NR5A1;GPER1;NR3C1;ANXA1;HSD17B13;IFNG;APOE;IGF1R;IGFBP7;CCN1;IL1A;IL1B;LEP;LHCGR;MIR132;MIR204;MIR30C1;MIR33A;NFKB1;PDGFA;WNT4;PPARA;PTGS2;SNAI2;SNAI1;SOD1;BRCA1;STAR;TSPO;TNF;C3;AKR1C3;CD74	4.76885	1.15359e-17
GOBP_MITOTIC_CELL_CYCLE	SRA1;KIF20A;CDK4;CDK6;CDKN1A;CDKN1B;CDKN2A;CDKN3;CIB1;ZNRD2;KHDRBS1;DCTN6;CFL1;PHB2;CKS1B;CTNNB1;CYP1A1;DNMT3A;DUSP1;EDN1;EDNRA;EGF;EGFR;EIF4EBP1;AIF1;ERCC2;AKT1;ESRRB;EZH2;FANCD2;FOXM1;PLCB1;SIRT1;NUP62;POLDIP2;GJA1;TMOD3;ANXA1;HGF;HOXA13;APEX1;BIRC5;ID2;IGF1;IL1A;IL1B;IL10;INHBA;INSR;ITGB1;RHOC;STMN1;MIR195;MIR21;MIR214;MIR29C;MIR30C2;MDM2;MECP2;MNAT1;MSH2;MUC1;MYB;MYC;ATM;PCNA;RMDN1;PDGFRB;PLK…	2.24945	1.22293e-17
GOBP_REGULATION_OF_T_HELPER_1_TYPE_IMMUNE_RESPONSE	IL27;TBX21;ANXA1;IL1B;IL1R1;IL12B;IL12RB1;IL18;IL23A;CCL19;CCR2;IL18R1;IL33	29.0826	1.2349e-17
GOBP_REGULATION_OF_REACTIVE_OXYGEN_SPECIES_METABOLIC_PROCESS	CDKN1A;MTCO2P12;CLCN3;CRP;MAPK14;CYP1B1;AKR1C1;AGT;AGTR1;F2;F2RL1;FOXM1;FOXO1;FOXO3;FPR2;GSTP1;HIF1A;HP;BIRC2;ITGAM;LEP;MIR21;MIR27B;MMP3;NFE2L2;PAX2;PDGFRB;PPARA;BCL2;BMP7;SOD1;SOD2;BRCA1;TGFB1;THBS1;TSPO;TLR4;TNF;TP53;TYROBP;AKR1C3;BECN1;CD36	5.37146	1.42209e-17
GOBP_REGULATION_OF_GRANULOCYTE_CHEMOTAXIS	DNM1L;CCR7;CSF1;CSF1R;IL34;DPP4;EDN1;DAPK2;MSTN;IL4;CXCL8;CXCR2;MDK;IL23A;MAPK1;MAPK3;RARRES2;CCL5;CCL19;CCL21;THBS1;SLIT2;CD74	12.8011	1.44769e-17
GOBP_INOSITOL_LIPID_MEDIATED_SIGNALING	RASGRP1;CSF1R;CSF3;DCN;AGT;EDN1;EGF;EGFR;ERBB2;AKT1;F2;F2R;F2RL1;FCGR3A;FGF2;FLT1;PLCB1;FN1;SIRT1;FSHR;GATA3;GH1;ANGPT1;GPER1;HGF;IGF1;IGF1R;IL18;INSR;KDR;LEP;MIR126;MIR20A;MIR21;NTRK2;NTRK3;PDGFA;PDGFRA;PDGFRB;PIK3CA;PIK3CB;PIK3CD;PIK3CG;PLCB4;TREM2;MYDGF;PTEN;CCL5;SOX9;SRC;TEK;TGFB2;TNF;TWIST1;EZR;CAT;BECN1;SEMA3E	4.73089	1.52634e-17
GOBP_INTERLEUKIN_8_PRODUCTION	NOD1;CRP;F2R;F2RL1;F3;PTPN22;ANXA1;HMGB1;APOA2;IL1B;IL6;IL10;LEP;LGALS9;MIR100;MIR132;MIR204;NOS2;SERPINE1;IL17D;MIR488;PTPRC;RELA;STAT3;TLR2;TLR3;TLR4;TNF;HYAL2;BCL10;CD14;ADIPOQ;CD74	6.91138	1.54847e-17
GOBP_B_CELL_PROLIFERATION	ADA;RASGRP1;CDKN1A;FCRL3;CTLA4;AHR;EPHB2;TNFRSF21;HSPD1;IFNA1;IFNA13;IL2;IL4;IL7;IL7R;IL9;IL10;IL13;LYN;MIF;ATM;PRLR;PTEN;PTPRC;BAX;IL21;BCL2;BCL6;BTK;TLR4;TYROBP;CASP3;CARD11;IRS2;WNT3A;CD19;MS4A1;CD40LG;CD74;CD79A	6.91138	1.54847e-17
GOBP_EPITHELIAL_TO_MESENCHYMAL_TRANSITION	PDCD6;COL1A1;CTNNB1;DDX5;EDN1;EDNRA;EPHA3;EZH2;FGFR2;HEY1;MTOR;GATA3;GREM1;PDCD4;GSK3B;HDAC2;HGF;HIF1A;FOXA2;IGF1;RBPJ;IL1B;IL6;MIR21;SMAD2;SMAD3;SMAD4;MDK;NOTCH1;NOTCH4;WNT4;PTEN;ROCK1;S100A4;SFRP1;SFRP2;BMP4;BMP7;SNAI2;SNAI1;SOX9;TGFB1;TGFB1I1;TGFB2;TGFB3;TGFBR1;TWIST1;HMGA2	4.91127	1.58661e-17
GOBP_RHYTHMIC_PROCESS	DNM1L;PPARGC1A;CLDN4;CREB1;CRH;PARP1;CSF2;CYP1B1;DDX5;AGRP;DRD2;EGR1;AHR;NR2F6;ESR1;EZH2;FOXO3;SIRT1;MTOR;FSHB;FSHR;NR5A1;MSTN;AMH;GHRH;GHRHR;GSK3B;ANXA1;HDAC1;HDAC2;ID2;IGF1R;INHBA;KISS1;LEP;LHCGR;MDK;MMP2;NGFR;NOS2;NOS3;NTRK2;OPRM1;OXTR;PCNA;PDGFRA;SERPINF1;PGR;PPARA;PPARG;AXL;MAPK8;RETN;PTEN;PTN;RORB;SLC6A4;BMPR1B;SLIT3;SRC;SRD5A1;KLF9;HNF1B;TGFB2;TGFB3;KLF10;TIMP4;TNF;TP53;TWIST1;ZP3;CASP3;NR…	3.57397	1.59576e-17
GOBP_MONOCARBOXYLIC_ACID_BIOSYNTHETIC_PROCESS	CRABP2;CYP1A1;CYP1A2;CYP3A4;EDN1;SIRT1;ALOX15;GATM;HPGDS;GPX4;GSTM1;GSTM2;GSTP1;ANXA1;ACACA;IL1B;IDO1;LIPC;MIR132;MIR204;MIR30C1;MIR33A;MIF;PTGS2;RBP1;SRR;BRCA1;STAR;XBP1;AKR1C3;LIPG;TECR;PTGES;CD74	4.26181	1.71419e-17
GOBP_CELLULAR_RESPONSE_TO_ALCOHOL	CDK4;CFTR;CREB1;CTNNB1;CYP1B1;ACE;AKR1C2;DNMT3A;AHR;AKT1;FOXO3;FOS;ACACA;IGF1R;INHBA;MIR342;P2RY6;UGT1A1;PTGER2;PTGER4;PTGFR;SFRP1;SOD2;BRCA1;KLF9;AKR1C3;CDH1	7.07798	2.07771e-17
GOBP_ANTERIOR_POSTERIOR_PATTERN_SPECIFICATION	TSHZ1;CDX1;SEMA3C;CTNNB1;EMX2;DKK1;HEY1;GLI3;FOXA2;HOXA10;HOXA11;HOXB4;RBPJ;HES5;SMAD2;SMAD3;SMAD4;ATM;NOTCH1;PSEN1;SFRP1;SFRP2;BMP4;HNF1B;TDGF1;NR2F2;TGFBR1;TP53;WT1;WNT3A;ACVR2B;GDF3	4.23441	2.19413e-17
GOBP_ORGANIC_HYDROXY_COMPOUND_TRANSPORT	ABCC4;CETP;CFTR;LILRB1;CNR1;CRH;CRHR1;ADRA2B;TTC39B;CYP19A1;AKR1C1;DRD2;AGT;AGTR1;EGF;SIRT1;GDNF;ANXA2;APOA2;APOE;AQP1;AQP2;AQP9;ITGB3;KCNQ1;LEP;LIPC;MIR148A;MIR17;MIR27B;MIR33A;MAOB;MECP2;NFKB1;NFKBIA;NOS1;OXTR;TREM2;PON1;PPARG;REN;ACTB;RXRA;CXCL12;SLC6A4;SNCG;SPP1;STAR;SYT1;MIR33B;TSPO;VIP;NR0B2;ADIPOQ;LIPG;CD36	3.62245	2.28721e-17
GOBP_CELLULAR_RESPONSE_TO_KETONE	CDK4;POSTN;CFTR;CREB1;CYP1B1;ACE;AKR1C2;AHR;AKT1;FOXO3;SIRT1;FOS;MSTN;GJB2;NR3C1;ACACA;IGF1R;AQP1;AR;ARG1;MIR342;P2RY6;SERPINF1;ERRFI1;TRERF1;PTGER2;PTGER4;PTGFR;SFRP1;SPP1;SRC;SRD5A1;KLF9;AKR1C3	6.80071	2.32782e-17
GOBP_FATTY_ACID_METABOLIC_PROCESS	PPARGC1A;CNR1;MAPK14;CYP1A1;CYP1A2;CYP1B1;CYP2B6;CYP2C19;CYP3A4;AKR1C1;AKR1C2;DECR1;EDN1;AKT1;AKR1B1;FMO2;SIRT1;ALOX15;HPGDS;GPX4;GSTM1;GSTM2;GSTP1;ANXA1;ACACA;HPGD;IL1B;LEP;LIPC;CYP4F3;MIR132;MIR204;MIR30C1;MIR33A;MIF;PPARA;PPARG;PTGS2;SOX9;BRCA1;TNFRSF1A;C3;TWIST1;XBP1;AKR1C3;IRS2;ADIPOQ;LIPG;CD36;TECR;PTGES;NCOR1;CD74	3.12476	2.35202e-17
GOBP_DEFENSE_RESPONSE_TO_BACTERIUM	KLRC4-KLRK1;NOD1;CXCL13;CRP;DEFB4A;F2;F2RL1;FGA;KLRK1;FPR2;FOXP1;ANG;HP;RBPJ;IL1B;IL6;IL7R;AQP1;IL10;IL12B;IL17A;IL18;LGALS4;LTA;LTF;MBL2;MPO;NOS2;SERPINE1;IL23A;PLA2G2A;TREM2;RARRES2;RNASE3;SHC1;SLPI;ADAM17;TLR2;TLR3;TLR4;TNF;TNFRSF1A;CD36	3.19583	2.52283e-17
GOBP_JNK_CASCADE	RASGRP1;NOD1;LRRK2;CCR7;CRK;SIRPA;CCN2;EGFR;ERCC6;F2RL1;PLCB1;PTPN22;PDCD4;GSTP1;HMGB1;IGF1R;IL1A;IL1B;SMAD3;NFKB1;MAPK8;MAP2K7;PTGER4;CCL19;CCL21;SFRP1;SFRP2;TLR3;TLR4;TNF;WNT7A;AXIN1;FZD7;CASR;HDAC3;NCOR1;RASSF2	4.8285	2.82125e-17
GOBP_CELLULAR_RESPONSE_TO_OXYGEN_LEVELS	CDKN1B;NDRG1;PHB2;UCN3;DNMT3A;EDN1;EGR1;ENO1;AKT1;FOXO1;FOXO3;SIRT1;FOS;MTOR;GATA6;HIF1A;RBPJ;FAS;AQP1;MALAT1;MIR126;MIR145;MIR17;MIR21;MIR210;MIR214;MIR34A;MDM2;MYC;NFE2L2;NOTCH1;PIK3CB;TREM2;PPARG;PTEN;PTGS2;BCL2;SFRP1;SLC2A4;BMP7;SRC;STC1;TERT;TP53;TWIST1;VEGFA;NDNF;CASR;STC2	4.8285	2.82125e-17
GOBP_REGULATION_OF_LEUKOCYTE_MEDIATED_CYTOTOXICITY	KLRC4-KLRK1;RASGRP1;CD226;LILRB1;CRK;CX3CR1;F2RL1;KLRK1;CADM1;NCR3;HLA-B;HLA-DRB1;HLA-G;ICAM1;IL7R;IL12B;IL12RB1;ITGAM;KIR2DL4;KLRC1;ARG1;LEP;LGALS9;SH2D1A;NOS2;IL23A;B2M;PTPRC;PVR;IL21;TYROBP;VAV1	7.85149	2.88645e-17
GOBP_KIDNEY_EPITHELIUM_DEVELOPMENT	YAP1;CTNNB1;AGT;AGTR2;EDNRA;FGF1;FGF2;FGFR2;GATA3;GREM1;GDNF;GLI3;HOXA11;CXCR2;AQP1;ILK;HES5;LIF;TACSTD2;EPCAM;SMAD2;SMAD3;SMAD4;MYC;NOTCH1;PAX2;WNT4;RARB;BCL2;SDC1;SDC4;SFRP1;BMP4;BMP7;SOX9;HNF1B;TCF21;VEGFA;WT1;PAX8;CAT;PROM1;SLIT2;ADIPOQ;HS3ST3B1	5.37139	2.96266e-17
GOBP_ALCOHOL_METABOLIC_PROCESS	CEBPA;CETP;CFTR;CYP2R1;SGPP2;CYP1A1;CYP1A2;CYP1B1;CYP3A4;TTC39B;CYP11A1;AKR1C1;AKR1C2;FGF1;FGF2;AKR1B1;PLCB1;GBA;GPER1;HSD11B2;APOA2;IGF1;APOE;IL4;IMPA2;LBR;LEP;LEPR;LHCGR;LIPC;LIPE;MIR30C1;MAS1;MECP2;NFKB1;P2RY6;HSD17B7;WNT4;PON1;PTEN;SOD1;STAR;SULT1E1;SULT1A1;SULT2A1;NR0B2;CAT;AKR1C3	3.23254	3.27507e-17
GOBP_NEGATIVE_REGULATION_OF_PRODUCTION_OF_MOLECULAR_MEDIATOR_OF_IMMUNE_RESPONSE	LILRB1;FCRL3;ANGPT1;TBX21;APOA2;IL10;ARG1;FOXP3;AXL;BCL6;TGFB1;TGFB2;TGFB3;TNF;TWIST1;IL33	14.2956	3.4658e-17
GOBP_HETEROTYPIC_CELL_CELL_ADHESION	LILRB2;CD200R1;SIRPA;FGA;IL1B;IL1RN;IL10;ITGA5;ITGAV;ITGB1;ITGB3;CD200;NINJ1;PTPRC;WNK1;BMP7;THY1;TNF;VCAM1;SKAP1;ADIPOQ;CD44;CD47	10.5981	3.48004e-17
GOBP_REGULATION_OF_HEART_CONTRACTION	ADA;ABCC9;ADM;ADRA1A;CCN2;DRD2;AGT;HBEGF;AGTR2;EDN1;EDNRA;GJA1;GSTM2;IL2;KCNQ1;MIR200C;MDM2;NOS1;NOS3;PIK3CG;RGS4;S100A1;SLC1A1;STC1;TGFB2;THRA;TNF;UCN;TRPV1;CALCA	4.24696	3.513e-17
GOBP_CELLULAR_AMIDE_METABOLIC_PROCESS	ADA;MIR543;TOB1;EIF1;CEBPA;KHDRBS1;SMPDL3A;CPM;CYP1B1;DAPK1;ACE;DIO2;DPP4;EIF4EBP1;ELAVL1;ERBB2;AKT1;FOXO3;MTOR;GBA;HPGDS;ANG;GPX4;GSTM1;GSTM2;GSTP1;GSTT1;ACACA;IFNG;IFNGR1;IGF1;APOE;CCN1;IL6;EIF3E;ITGA2;ITGB8;GSTK1;ARG1;LGALS4;MIR100;MIR10B;MIR132;MIR145;MIR148A;MIR17;MIR181C;MIR20A;MIR200B;MIR200C;MIR204;MIR205;MIR21;MIR210;MIR27B;MIR29C;MIR31;MLH1;MME;MIR135B;MSI1;NFE2L2;YBX1;NTRK2;MIR378A;PPP…	2.05045	3.54909e-17
GOBP_ENDODERM_DEVELOPMENT	CTNNB1;DUSP1;DUSP2;DKK1;FN1;GATA6;HDAC1;INHBA;ITGA5;ITGAV;LAMB1;SMAD2;SMAD3;SMAD4;MMP2;MMP9;MMP14;NOTCH1;POU5F1;MAP2K1;BMP4;SOX2;HNF1B;VTN;NANOG;HMGA2;GDF3	8.12532	3.55872e-17
GOBP_REGULATION_OF_B_CELL_ACTIVATION	ADA;CDKN1A;FCRL3;CTLA4;AHR;EPHB2;TNFRSF21;TBX21;ID2;IL2;IL4;IL6;IL7;IL10;IL13;INHA;INHBA;LYN;MIF;MLH1;MMP14;MSH2;ATM;FOXP3;PRLR;PTEN;PTPRC;IL21;BCL2;BCL6;SFRP1;STAT6;BTK;TGFB1;TLR4;TYROBP;XBP1;CASP3;CARD11;IRS2;WNT3A;CD19;CD74	4.44265	4.02211e-17
GOBP_APPENDAGE_MORPHOGENESIS	BCL2L11;SEMA3C;OSR2;CRABP2;CTNNB1;DLX5;MEGF8;FGF9;FGFR2;DKK1;GREM1;INTU;GLI3;HDAC1;HDAC2;HOXA10;HOXA11;HOXA13;IHH;SMAD4;NOTCH1;MED1;PSEN1;SALL4;BAX;RARB;SFRP2;BMP4;BMP7;SOX9;TGFB2;TWIST1;WNT7A;HAND2	5.42747	4.47589e-17
GOBP_DEVELOPMENTAL_GROWTH_INVOLVED_IN_MORPHOGENESIS	YAP1;SEMA3C;CRABP2;CSF1;CTNNB1;DPYSL2;S1PR1;EDN1;EDNRA;MEGF8;ESR1;FGF1;FGFR2;NEDD4L;FN1;LPAR3;GSK3B;APOE;ITGB1;AREG;L1CAM;LIMK1;MIR195;MAP2;NGF;NOTCH1;NRN1;MED1;SEMA6A;BDNF;CCL11;CXCL12;SFRP1;SFRP2;BMP4;SLIT3;SOX9;SPP1;SYT1;HNF1B;VEGFA;CXCR4;NRP1;WNT3A;SLIT2;SEMA3E;CDH1	4.0358	4.53275e-17
GOBP_RESPONSE_TO_RADIATION	CDKN1A;YAP1;PARP1;MAPK14;DNMT3A;AGRP;DRD2;EGFR;EGR1;NR2F6;ERCC1;ERCC2;AKT1;ERCC6;FANCD2;FEN1;SIRT1;FOS;GATA3;ANGPT2;MSH6;ANXA1;H2AX;HIF1A;ID2;IL1A;AQP1;IL12B;CXCL10;ITGB1;ITGB3;KRAS;MIR21;MDM2;MECP2;MME;MMP1;MMP2;MMP3;MMP9;MSH2;MYC;ATM;OGG1;OPRM1;FOXP3;PCNA;POLD1;MAPK8;MAP2K7;PTGS2;PTPRC;BAX;CCND1;BCL2;RELA;BCL2L1;SAG;CCL11;CXCL12;SFRP1;SFRP2;DCLRE1C;SNAI2;SOD2;BRCA1;BRAF;BRCA2;TIMP1;TNF;TP53;TXN…	2.93216	4.73758e-17
GOBP_RESPONSE_TO_CORTICOSTEROID	BCL2L11;UCN3;COL1A1;ADM;PARP1;CCN2;CYP1B1;ACE;EDN1;AIF1;EPO;FOXO3;FOS;GBA;MSTN;GHRHR;GJB2;GPER1;NR3C1;ANXA1;HSD3B1;HSD3B2;HSD11B2;APOA2;IGF1R;IGFBP7;IL1RN;IL6;AQP1;IL10;AREG;ARG1;MAOB;MDK;NOTCH1;NTRK3;IL22;PAPPA;PCNA;SERPINF1;PIK3CA;ERRFI1;UGT1A1;PTGS2;CCND1;BCL2;SDC1;SLIT3;SRC;SRD5A1;SSTR4;STC1;KLF9;TNF;UCN;ZFP36;CASP3;AKR1C3;CLDN1;SLIT2;ADIPOQ	4.93846	5.12454e-17
GOBP_REGULATION_OF_ACTIN_FILAMENT_ORGANIZATION	CCR7;CSF3;CCN2;S1PR1;F2RL1;ALOX15;MTOR;LMOD1;TMOD3;HCK;RHOC;STMN1;LIMK1;MIR20A;MIR21;MIR214;TACSTD2;SMAD3;MET;PAK1;PIK3CA;WNT4;PTGER4;RASA1;RGS4;ROCK1;CCL11;CCL21;CX3CL1;SDC4;CXCL12;SFRP1;BRAF;TACR1;TGFB3;TGFBR1;ARHGAP28;NRP1;SLIT2;CD47;CDC42	3.67615	5.25178e-17
GOBP_NEGATIVE_REGULATION_OF_LEUKOCYTE_APOPTOTIC_PROCESS	ADA;LILRB1;CCR7;KIFAP3;FOXP1;HIF1A;IL2;IL7R;CXCR2;IDO1;KITLG;MIF;PDCD1;AXL;BCL2;BCL2L1;BCL6;CCL5;CCL19;CCL21;CXCL12;BMP4;IRS2;BCL10;CD74	11.8161	5.56057e-17
GOBP_EYE_MORPHOGENESIS	CTNNB1;EPHB2;FBN1;FGF2;ZHX2;FJX1;NECTIN3;GLI3;HIF1A;IHH;FASLG;AQP1;AQP5;KDR;NOTCH1;NTRK2;PAX2;BAX;NECTIN1;RARB;BCL2;RORB;SLC1A1;BMP4;BMP7;SOX9;STAT3;ZEB1;THY1;TWIST1;VEGFA;BCAR3;PROM1	5.02202	5.9098e-17
GOBP_HEART_MORPHOGENESIS	YAP1;SEMA3C;CTNNB1;S1PR1;EDN1;EDNRA;MEGF8;EPHB4;FGFR2;DKK1;PLXND1;HEY1;MTOR;GATA3;GATA6;ANKRD1;PDCD4;HIF1A;CCN1;RBPJ;IHH;ILK;INSR;JUN;MIR17;MIR195;MIR20A;MIR21;SMAD3;SMAD4;MDM2;NOS3;NOTCH1;DLL4;MED1;PSEN1;SFRP2;BMP4;BMP7;SLIT3;SNAI2;SNAI1;SOX9;TEK;TGFB1;TGFB2;TGFB3;TGFBR1;CLDN5;TP53;TWIST1;VEGFA;NRP1;WNT3A;SLIT2;HAND2;CDC42	3.79551	6.25898e-17
GOBP_MYELOID_CELL_ACTIVATION_INVOLVED_IN_IMMUNE_RESPONSE	RASGRP1;CX3CR1;F2RL1;GATA2;IFNG;IL4;IL13;ITGAM;LGALS9;LYN;ENPP3;PIK3CD;PIK3CG;TREM2;BTK;CCR2;TYROBP;IL33	7.01653	6.40916e-17
GOBP_BIOLOGICAL_PROCESS_INVOLVED_IN_INTERACTION_WITH_HOST	CCR5;CD55;DPP4;AGTR1;EGFR;HLA-DRB1;HMGB1;HSPD1;ICAM1;IFIT1;CXCL8;INSR;ITGA2;ITGA5;ITGAV;ITGB1;ITGB3;LGALS1;LGALS9;LTF;MRC1;NCAM1;SLC52A1;AXL;PVR;NECTIN1;BCL2L1;SRC;BSG;CXCR4;THOC6;NECTIN4;HYAL2;NRP1;CLDN1;CD86;CD74;CDK1	4.30306	7.00586e-17
GOBP_REGULATION_OF_T_CELL_MIGRATION	CXCL13;CD200R1;CRK;AIF1;CXCL10;ITGB3;CD200;CCL5;CCL21;CXCL12;WNK1;ADAM17;CCR2	13.6145	7.26441e-17
GOBP_GLYCEROLIPID_METABOLIC_PROCESS	CETP;PHB2;CSF1R;FGF2;PLCB1;SIRT1;ALOX15;ANG;APOA2;APOE;IMPA2;LIPC;LIPE;MIR30C1;MECP2;ATM;PDGFA;PDGFRB;PIK3CA;PIK3CB;PIK3CD;PIK3CG;PLA2G2A;PON1;PTEN;C3;CAT;BECN1;LIPG	3.06913	8.69132e-17
GOBP_ACTIN_FILAMENT_BUNDLE_ORGANIZATION	CCN2;S1PR1;AIF1;MTOR;ITGB1;RHOC;STMN1;LIMK1;MIR20A;MIR21;TACSTD2;SMAD3;MET;PAK1;WNT4;PTGER4;ROCK1;CX3CL1;SDC4;SFRP1;FSCN1;SRC;BRAF;TACR1;TGFB3;TGFBR1;EZR;ARHGAP28;CALD1;ACTN1;NRP1;CD47;CDC42	4.85159	9.14378e-17
GOBP_CALCIUM_ION_TRANSMEMBRANE_TRANSPORT	CCR5;CCR7;CRHR1;ADRA1A;CCN2;DRD2;EDN1;EDNRA;EPO;F2;F2R;FGF2;GPER1;REM1;GSTM2;ANXA2;FASLG;IL13;CXCL10;ITGAV;ITGB3;LHCGR;LYN;MIR200C;MIR21;CXCL9;NOS1;OPRM1;P2RX3;P2RX5;P2RY6;PIK3CG;PSEN1;PTPRC;BAX;BCL2;CCL19;CCL21;CX3CL1;THY1;TRPC6;TRPV1;WNT3A;CD19;MS4A1	3.27664	9.20959e-17
GOBP_EXOCYTOSIS	RASGRP1;ABCC4;CFTR;PRRT2;LRRK2;CCR1;CNR1;ADRA1A;DRD2;F2RL1;FCGR3A;FGA;GATA2;ANK1;GSK3B;ANXA1;ANXA2;HCK;IFNG;IL4;IL13;ITGAM;LGALS9;LYN;NOTCH1;PAK1;PIK3CD;PIK3CG;PRKCB;VPS11;PSEN1;CCL5;SDC1;SDC4;BRAF;SYP;SYT1;BTK;CCR2;WNT7A;ZP3	3.16449	9.27672e-17
GOBP_MICROTUBULE_BASED_PROCESS	KIF20A;RASGRP1;CDKN1B;CIB1;DCTN6;CFL1;CRMP1;CTNNB1;EPHA3;ERBB2;FKBP4;KIFAP3;SIRT1;NUP62;RNF19A;POLDIP2;GJA1;INTU;GSK3B;HIF1A;BIRC5;ITGB1;STMN1;MAP2;MECP2;MET;MLH1;PAK1;RMDN1;PLK1;PPP2R1A;SYBU;ROCK1;SOD1;BRCA1;BRCA2;TACR1;UCHL1;EZR;XRCC3;AXIN1;HDAC3;CCNB1;WNT3A;NCOR1;CDK1;CDC42	2.20932	9.30614e-17
GOBP_NOTCH_SIGNALING_PATHWAY	CDK6;CDKN1B;YAP1;CEBPA;POSTN;CFD;AKT1;HEY1;GATA2;RBPJ;IL2RA;IL17A;HES5;MIR126;MECP2;MMP14;NFKBIA;NOS3;NOTCH1;NOTCH4;DLL4;PSEN1;BCL6;BMP7;SNAI2;SNAI1;SOX9;SRC;STAT3;ADAM17;HNF1B;TGFB2;TIMP4;NR0B2	4.5724	9.4441e-17
GOBP_NEGATIVE_REGULATION_OF_LYMPHOCYTE_MEDIATED_IMMUNITY	LILRB1;CRK;CD55;AHR;TBX21;HLA-B;HLA-G;IL7R;KIR2DL4;KLRC1;ARG1;LGALS9;FOXP3;PTPRC;BCL6	11.3782	1.05743e-16
GOBP_POSITIVE_REGULATION_OF_CD4_POSITIVE_ALPHA_BETA_T_CELL_ACTIVATION	CD55;ANXA1;HLA-DRB1;IFNG;IL12B;IL12RB1;IL18;LGALS9;MIR21;MYB;FOXP3;IL23A;CCL19;CARD11;CD86	14.4871	1.09669e-16
GOBP_REGULATED_EXOCYTOSIS	RASGRP1;ABCC4;PRRT2;LRRK2;CNR1;ADRA1A;DRD2;F2RL1;FCGR3A;GATA2;GSK3B;HCK;IL4;IL13;ITGAM;LGALS9;LYN;NOTCH1;PIK3CD;PIK3CG;PRKCB;PSEN1;BRAF;SYP;SYT1;BTK;CCR2;WNT7A;ZP3	3.89102	1.10051e-16
GOBP_NEURON_PROJECTION_GUIDANCE	PLXNC1;SEMA3C;CRMP1;CSF1R;ARX;DLX5;DPYSL2;EDN1;EDNRA;MEGF8;EPHA3;EPHB2;EPHB4;ERBB2;PLXND1;GATA3;GDNF;GLI3;L1CAM;RHOG;LAMC2;SMAD4;NCAM1;NGFR;NOTCH1;ROBO4;SEMA6A;NECTIN1;BDNF;CXCL12;BMP7;BMPR1B;SLIT3;BSG;VEGFA;NRP1;WNT3A;ARTN;SLIT2;SEMA3E	3.94124	1.13438e-16
GOBP_CARBOHYDRATE_BIOSYNTHETIC_PROCESS	PPARGC1A;EGF;AKT1;FOXO1;AKR1B1;SIRT1;GPER1;NR3C1;GSK3B;HAS1;IGF1;IMPA2;INSR;LEP;LEPR;LHCGR;MIR195;MAS1;MST1;NFKB1;P2RY6;ENPP1;PPARA;ST6GALNAC1;TGFB1;IRS2;ADIPOQ	4.17627	1.17229e-16
GOBP_MAINTENANCE_OF_LOCATION_IN_CELL	CCR5;CCR7;DRD2;AKT1;ALB;F2;F2R;FGF2;NR5A1;GPER1;GSTM2;HK1;APOE;FASLG;IL13;CXCL10;ITGB3;LHCGR;LYN;CXCL9;NOS1;P2RY6;PSEN1;PTPRC;BAX;CCL19;CCL21;CX3CL1;TSPO;THY1;TXN;TRPV1;CD19	4.05201	1.17525e-16
GOBP_CARDIAC_CHAMBER_DEVELOPMENT	SEMA3C;EDNRA;FGFR2;PLXND1;HEY1;GATA3;GATA6;HIF1A;HOXA13;IGF1R;CCN1;RBPJ;SMAD4;MDM2;NOS3;NOTCH1;DLL4;MED1;SALL4;SFRP2;BMP4;BMP7;SLIT3;TEK;TGFB1;TGFB2;TGFBR1;TP53;PAX8;NRP1;SLIT2;HAND2	4.80929	1.2164e-16
GOBP_TRANSFORMING_GROWTH_FACTOR_BETA_PRODUCTION	CDH3;LILRB1;FN1;GATA6;HIF1A;IL13;ITGAV;ITGB8;LGALS9;SMAD3;SMAD4;CD200;FOXP3;PTGS2;CX3CL1;TGFB2;THBS1;TYROBP	15.5647	1.58161e-16
GOBP_REGULATION_OF_ALPHA_BETA_T_CELL_DIFFERENTIATION	ADA;IL27;GATA3;GLI3;TBX21;ANXA1;HLA-DRB1;HMGB1;IFNG;IHH;IL2;IL4;IL12B;IL12RB1;IL18;LGALS9;MIR21;MYB;FOXP3;IL23A;BCL6;CCL19;RUNX1;RUNX3;CD86	8.74612	1.59176e-16
GOBP_CELLULAR_RESPONSE_TO_MECHANICAL_STIMULUS	COL1A1;AGT;FGF2;ANKRD1;IGF1R;FAS;IL1B;AQP1;IL13;ITGA2;ITGB3;NFKB1;MAPK3;MAPK8;PTGER4;PTGS2;SLC2A1;SOX9;TLR3;TLR4;TNFRSF1A;BCL10;IL33	8.74612	1.59176e-16
GOBP_MYELOID_LEUKOCYTE_MEDIATED_IMMUNITY	RASGRP1;CX3CR1;ACE;F2;F2RL1;FCGR3A;GATA2;IL4;IL6;IL13;ITGAM;ARG1;LGALS9;LYN;PIK3CD;PIK3CG;ADAM17;BTK;C3;CCR2;TYROBP	6.30811	1.63762e-16
GOBP_POSITIVE_REGULATION_OF_PROTEIN_KINASE_B_SIGNALING	HPSE;CCR7;CSF3;CX3CR1;AKR1C2;HBEGF;EGF;EGFR;F3;FGF2;GATA3;ANGPT1;IAPP;IGF1;IGF1R;IL18;INSR;ITGB1;LEP;MIR126;MIR132;MIR143;MIR21;MET;MST1R;PDGFA;PIK3CA;PIK3CB;PIK3CD;PIK3CG;AXL;MYDGF;CCL19;CCL21;CX3CL1;SRC;TEK;TGFB1;TGFBR1;THBS1;TNF;TXN;AKR1C3	5.93072	1.6428e-16
GOBP_BRANCHING_MORPHOGENESIS_OF_AN_EPITHELIAL_TUBE	YAP1;PHB2;CSF1;CTNNB1;AGT;AGTR2;EDN1;EDNRA;EGF;ESR1;FGF1;FGF2;FGFR2;PLXND1;GREM1;GDNF;GLI3;HOXA11;IHH;ILK;AR;AREG;KDR;KRAS;TACSTD2;SMAD4;MDK;MET;MMP14;MYC;NOTCH1;NOTCH4;PAK1;PAX2;PGR;WNT4;DLL4;MED1;BCL2;CCL11;SFRP2;BMP4;BMP7;SOX9;SRC;HNF1B;TCF21;TNF;VDR;VEGFA;WT1;PAX8;CASR;NRP1;SLIT2;SEMA3E;HS3ST3B1	4.96836	1.6531e-16
GOBP_DEVELOPMENTAL_MATURATION	CDH3;CEBPA;CFTR;CLCN3;LRRK2;CTNNB1;CX3CR1;S1PR1;EDN1;EDNRA;EPO;ERCC2;FOXO3;AKR1B1;GATA2;GATA3;GBA;GREM1;GH1;GHRHR;ANG;HIF1A;IGF1;RBPJ;IHH;IL15;KDR;HES5;LEP;LTF;MECP2;MMP2;PAEP;PAX2;PGR;PPARG;PPP2R1A;SYBU;AXL;PTEN;IL21;RB1;BCL2;REN;CCL19;CCL21;CX3CL1;BRCA2;SYP;BTK;TGFB2;C3;VEGFA;YWHAZ	3.4627	1.65944e-16
GOBP_LYMPHOCYTE_HOMEOSTASIS	ADA;BCL2L11;DOCK11;AKT1;SLC40A1;HIF1A;FAS;IL2;IL2RA;IL7R;LGALS9;LYN;MIF;FOXP3;BAX;BCL2;CASP3;BCL10;CD74	9.16697	1.80168e-16
GOBP_REGULATION_OF_CELLULAR_KETONE_METABOLIC_PROCESS	PPARGC1A;CNR1;ADM;EGR1;AKT1;FMO2;SIRT1;ANXA1;IL1B;MIR132;MIR204;MIR21;MIR30C1;MIR33A;WNT4;PPARA;PPARG;PTGS2;SOX9;BRCA1;STAR;TWIST1;AKR1C3;IRS2;ADIPOQ;NCOR1;CD74	5.43013	1.94265e-16
GOBP_POSITIVE_REGULATION_OF_JNK_CASCADE	RASGRP1;NOD1;CCR7;CRK;CCN2;F2RL1;PLCB1;HMGB1;IL1A;IL1B;MAP2K7;CCL19;CCL21;TLR3;TLR4;TNF;WNT7A;AXIN1;FZD7;RASSF2	6.95303	1.97378e-16
GOBP_NEGATIVE_REGULATION_OF_LEUKOCYTE_PROLIFERATION	LILRB2;LILRB1;CRP;CTLA4;ERBB2;GREM1;TNFRSF21;CD274;GSTP1;HLA-DRB1;HLA-G;IHH;IL2;IL2RA;IL10;IDO1;ARG1;LGALS9;LYN;MIR181C;ATM;FOXP3;ENPP3;PTEN;BCL6;SDC4;BMP4;BTK;TYROBP;CASP3;IL33;CD86	6.95303	1.97378e-16
GOBP_OSTEOBLAST_DIFFERENTIATION	TOB1;CDK6;ADAR;YAP1;CEBPA;CTHRC1;COL1A1;MAPK14;VCAN;CTNNB1;DDX5;DLX5;AKT1;FGF2;FGF9;FGFR2;GREM1;GLI1;GLI3;GSK3B;HGF;TNC;IGF1;IGFBP3;CCN1;IHH;IL6;ILK;AREG;LOX;LTF;MIR17;MIR20A;MIR200C;MIR21;MIR210;SMAD3;SMAD4;NOTCH1;WNT4;PPARG;RORB;SFRP1;SFRP2;BMP4;BMP7;BMPR1B;SNAI2;SNAI1;SOX2;SOX9;SPP1;TNF;TWIST1;VEGFC;CAT;WNT3A;CREB3L1;ACVR2B;HAND2;RASSF2	3.82632	2.13245e-16
GOBP_VASCULAR_TRANSPORT	ABCC9;ABCC4;SLC7A8;APOE;INSR;LEPR;SLC1A1;SLC2A1;SLC2A3;SLC2A4;SLC38A1;CD36	7.48732	2.2364e-16
GOBP_CARDIAC_CHAMBER_MORPHOGENESIS	SEMA3C;EDNRA;FGFR2;HEY1;GATA3;GATA6;HIF1A;CCN1;RBPJ;SMAD4;MDM2;NOS3;NOTCH1;DLL4;MED1;SFRP2;BMP4;BMP7;SLIT3;TEK;TGFB1;TGFB2;TGFBR1;TP53;NRP1;SLIT2;HAND2	5.69908	2.23708e-16
GOBP_REACTIVE_OXYGEN_SPECIES_METABOLIC_PROCESS	CDKN1A;MTCO2P12;CLCN3;LRRK2;CRP;MAPK14;CCN2;CYP1A1;CYP1A2;CYP1B1;AKR1C1;AGT;AGTR1;EDN1;F2;F2RL1;FOXM1;FOXO1;FOXO3;FPR2;GPX3;GSTP1;HIF1A;HP;BIRC2;CCN1;ITGAM;LEP;MIR21;MIR27B;MAOB;MMP3;MPO;NFE2L2;NOS2;NOS3;PAX2;PDGFRB;PPARA;BCL2;SLC1A1;BMP7;SOD1;SOD2;BRCA1;TGFB1;THBS1;TSPO;TLR4;TNF;TP53;TYROBP;VAV1;CAT;AKR1C3;BECN1;CD36	3.9242	2.29459e-16
GOBP_POSITIVE_REGULATION_OF_NERVOUS_SYSTEM_DEVELOPMENT	PLXNC1;CRABP2;IL34;CTNNB1;CX3CR1;ACE;DRD2;MEGF8;EPHB2;FGF2;PLXND1;FN1;DICER1;LPAR3;MTOR;GLI3;GPER1;HDAC1;HDAC2;HIF1A;ID2;IFNG;IL1B;IL1RAP;IL6;ITGB1;KRAS;L1CAM;LIF;LIMK1;LTA;LYN;MIR142;MDK;MECP2;MME;NGF;NOTCH1;NTRK2;OPRM1;OXTR;SERPINF1;MAP2K1;PTN;PTPRD;BDNF;CX3CL1;CXCL12;BRAF;TGFB1;TSPO;TLR2;TNF;TNFRSF1B;VEGFA;VEGFC;WNT7A;CXCR4;NRP1;WNT3A;IL33;SLIT2	3.57114	2.89513e-16
GOBP_NEGATIVE_REGULATION_OF_PEPTIDASE_ACTIVITY	AGT;AHSG;AKT1;ANXA2;HGF;NR4A1;BIRC2;BIRC3;BIRC5;IL9;AQP1;KNG1;LPA;LTF;MIRLET7B;MIR17;MIR195;MIR29C;MMP9;NGF;SERPINE1;SERPINB2;PAX2;SERPINF1;SERPINA1;PTGS2;RAF1;RARRES1;ROCK1;SFRP2;SLPI;SRC;THBS1;TIMP1;TIMP2;TIMP3;TIMP4;SERPING1;TNF;C3;C5;VEGFA;VTN;RNF34;SERPINH1;CD44	3.69989	2.93597e-16
GOBP_REGULATION_OF_CANONICAL_WNT_SIGNALING_PATHWAY	CDH3;YAP1;CTHRC1;LRRK2;COL1A1;MAPK14;CTNNB1;DLX5;EGF;EGFR;EGR1;FGF2;FGF9;FGFR2;DKK1;FOXO1;FOXO3;GREM1;RBMS3;GLI1;GLI3;GSK3B;HDAC1;APOE;IGFBP1;IGFBP6;RBPJ;ILK;MIR145;MIR29C;SMAD3;MDK;NFKB1;NOTCH1;PSEN1;SFRP1;SFRP2;WNK1;SNAI2;SOX2;SOX9;SRC;TGFB1;AXIN1;FZD7;LGR5;WNT3A	3.69989	2.93597e-16
GOBP_REGULATION_OF_EPITHELIAL_CELL_MIGRATION	PDCD6;CIB1;CXCL13;MAPK14;DCN;AGT;HBEGF;AGTR2;EDN1;EGF;AKT1;ETS1;FGF1;FGF2;SIRT1;CAPN7;MTOR;GATA2;GATA3;FOXP1;ANGPT1;ANGPT2;ANXA1;HIF1A;HMGB1;IFNG;APOE;IL4;ITGA2;ITGB3;JUN;KDR;MIR10B;MIR126;MIR132;MIR143;MIR20A;MIR200A;MIR200B;MIR200C;MIR204;MIR21;MIR210;TACSTD2;MIR22;MIR27B;MIR29C;MIR30A;MIR31;MECP2;MET;MMP9;MIR135B;MIR342;NFE2L2;NOS3;NOTCH1;SERPINF1;PIK3CB;PIK3CD;PIK3CG;DLL4;PPARG;PRKCA;PTEN;PTG…	3.47456	3.59293e-16
GOBP_REGULATION_OF_MACROPHAGE_ACTIVATION	CEBPA;LRRK2;HSPD1;IL4;IL6;IL10;IL13;MIR142;MIR145;MIF;CD200;ATM;TREM2;PTPRC;CX3CL1;THBS1;TLR4;IL33;CD74	9.93276	3.59584e-16
GOBP_MAMMARY_GLAND_DEVELOPMENT	BCL2L11;MTCO2P12;PHB2;CREB1;CSF1;CSF1R;CYP19A1;EGF;AKT1;ESR1;FGF2;FGFR2;GATA3;GHRHR;GLI3;NR3C1;HIF1A;ID2;AR;ITGA2;AREG;ARG1;NFKB1;NME1;NOTCH4;OXTR;PGR;WNT4;MED1;MAPK1;PRL;PRLR;BAX;RXFP1;CCND1;CCL11;BMP4;SOX9;SRC;BRCA2;STAT6;TDGF1;TGFB3;USF2;VDR;VEGFA;XBP1;IRS2;WNT3A	5.3124	3.68252e-16
GOBP_ENDOTHELIAL_CELL_PROLIFERATION	PDCD6;AGTR1;EGF;AKT1;F3;FGF2;FLT1;SIRT1;GATA2;ANG;ANGPT1;HIF1A;HMGB1;NR4A1;APOE;IL10;IL12B;ITGB3;JUN;KDR;ARG1;LEP;ARNT;MIRLET7B;MIR10B;MIR126;MIR132;MIR200C;MIR21;MIR22;MIR27B;MIR29C;MIR34A;MDK;MMP14;MIR135B;MIR342;NGFR;NRAS;PGF;PIK3CB;PIK3CD;DLL4;PPARG;PRKCA;MYDGF;PRL;MIR503;MIR483;CCL2;CCL11;CXCL12;BMP4;STAT3;ADAM17;TEK;NR2F2;TGFBR1;THBS1;TNF;VEGFA;VEGFC;VIP;PROK1;NRP1	4.17173	3.8435e-16
GOBP_POSITIVE_REGULATION_OF_PROTEIN_SERINE_THREONINE_KINASE_ACTIVITY	RASGRP1;CDKN1B;CIB1;AKAP13;CKS1B;LRRK2;CSF1R;CSK;IL34;EDN1;EGF;EGFR;ERBB2;AKT1;EZH2;FGF1;FGF2;DKK1;FLT1;SIRT1;GH1;IFNG;IL1B;INSR;LTF;KITLG;MIF;MNAT1;MST1R;NTF3;NTRK3;PAK1;PDGFA;PDGFRB;PIK3CG;MAP2K1;MAP2K7;PSEN1;PSMD10;PTPRC;CCND1;CCL19;BMPR1B;SRC;ADAM17;TDGF1;TGFB1;THBS1;TLR4;TNF;VEGFA;HMGA2;CAB39L;AXIN1;CCNB1;ADIPOQ;CD40LG;CDC6	3.90678	4.63767e-16
GOBP_REGULATION_OF_MUSCLE_SYSTEM_PROCESS	ADA;MYL9;CHRM3;PARP1;ADRA1A;CCN2;ADRA2B;AGT;EDN1;AIF1;ENO1;F2R;FOXO1;FOXO3;MSTN;FOXP1;GPER1;GSTM2;NR4A1;IGF1;ITGA2;KCNQ1;MIR143;MIR145;MIR17;MIR20A;MIR200C;MIR21;MIR214;SMAD3;SMAD4;NOS1;NOS3;NOTCH1;OXTR;PIK3CG;ERRFI1;PPARA;PPARG;PRKCA;PTGS2;RGS4;ROCK1;SOD1;STC1;TACR1;TNFRSF1A;TNFRSF1B;UCN;CALCA;BECN1;HAND2	3.70149	4.75531e-16
GOBP_EMBRYONIC_APPENDAGE_MORPHOGENESIS	BCL2L11;OSR2;CRABP2;CTNNB1;DLX5;MEGF8;FGF9;DKK1;GREM1;INTU;GLI3;HDAC1;HDAC2;HOXA10;HOXA11;HOXA13;IHH;SMAD4;NOTCH1;MED1;PSEN1;SALL4;BAX;RARB;SFRP2;BMP4;BMP7;TGFB2;TWIST1;WNT7A;HAND2	5.86774	4.85168e-16
GOBP_CELLULAR_MACROMOLECULE_BIOSYNTHETIC_PROCESS	MIR543;UST;TOB1;EIF1;KHDRBS1;GALNT6;CCR7;CTNNB1;CYP1B1;DAPK1;DIO2;HBEGF;EIF4EBP1;ELAVL1;TET3;EPO;ERBB2;AKT1;EXTL3;FOXO3;PLCB1;MTOR;GALNT3;GBA;ANG;GSK3B;HAS1;HIF1A;IGF1;APOE;IL6;IL15;INHA;INHBA;INSR;EIF3E;ITGA2;MIR100;MIR10B;MIR132;MIR145;MIR148A;MIR17;MIR181C;MIR195;MIR20A;MIR200B;MIR200C;MIR204;MIR205;MIR21;MIR210;MIR27B;MIR29C;MIR31;MLH1;MIR135B;MSI1;YBX1;MIR378A;ENPP1;QRSL1;ST6GALNAC1;PSEN1;MI…	2.00575	5.44966e-16
GOBP_PLATELET_ACTIVATION	MYL9;MAPK14;ADRA2B;F2;F2R;FGA;FN1;APOE;IL6;ILK;ITGB3;LYN;NOS3;PDGFA;PDGFRA;PF4;PF4V1;PIK3CA;PIK3CB;PIK3CG;PRKCA;AXL;ACTB;SRC;TLR4;VAV1;VWF;ACTN1;WNT3A;CD40LG	5.37159	5.58351e-16
GOBP_REGULATION_OF_PEPTIDE_TRANSPORT	CFTR;UCN3;CNR1;CRH;DRD2;FGA;FOXO1;GHRH;GHRHR;GPER1;HIF1A;HLA-DRB1;FOXA2;IFNG;IL1B;IL6;KISS1;LEP;NOS2;PSMD9;CCL5;SFRP1;TNF;TRH;UCN;CA2;PAX8;NR0B2;CASR;IRS2;CLOCK;CD74	4.41887	5.59389e-16
GOBP_MYELOID_LEUKOCYTE_CYTOKINE_PRODUCTION	NOD1;LILRB1;SIRT1;HLA-G;MIF;AXL;BCL6;TGFB1;TGFB2;TGFB3;TLR3;TLR4;TWIST1;BCL10;CD36;CD74	11.9121	5.76401e-16
GOBP_POSITIVE_REGULATION_OF_NIK_NF_KAPPAB_SIGNALING	NOD1;PHB2;EDN1;EGFR;GREM1;PDCD4;IL1B;IL12B;IL18;ILK;LGALS9;NR3C2;IL23A;TREM2;RELA;CCL19;TLR2;TLR3;TLR4;TNF;ACTN4;IL18R1;CD14;CD86	9.12496	5.77261e-16
GOBP_PHOSPHATIDYLINOSITOL_3_KINASE_SIGNALING	RASGRP1;CSF3;DCN;AGT;EDN1;EGF;EGFR;ERBB2;AKT1;F2;F2R;F2RL1;FCGR3A;FGF2;FLT1;FN1;SIRT1;FSHR;GATA3;GH1;ANGPT1;GPER1;HGF;IGF1;IGF1R;IL18;INSR;KDR;LEP;MIR126;MIR20A;MIR21;NTRK2;NTRK3;PDGFA;PDGFRA;PDGFRB;PIK3CA;PIK3CB;PIK3CD;PIK3CG;TREM2;MYDGF;PTEN;CCL5;SOX9;SRC;TEK;TGFB2;TNF;TWIST1;CAT;BECN1;SEMA3E	5.09619	6.08975e-16
GOBP_FEMALE_SEX_DIFFERENTIATION	FST;ZFP42;CYP19A1;ESR1;FOXO3;SIRT1;FSHB;FSHR;NR5A1;AMH;AMHR2;GNRH1;ANG;INHA;INHBA;INSR;KDR;LEP;LHCGR;SMAD4;KITLG;MMP2;MMP14;ATM;NOS3;PDGFRA;PGR;WNT4;AXL;RETN;BAX;BCL2;BCL2L1;SFRP1;BMPR1B;SLIT3;SOD1;SRC;SRD5A1;SRD5A2;BRCA2;NR2F2;VEGFA;WT1;ZP3;CASP3;SLIT2	5.63722	6.52924e-16
GOBP_LIPID_CATABOLIC_PROCESS	CDK4;SMPDL3A;CNR1;CYP1A2;CYP1B1;CYP3A4;CYP19A1;CYP26A1;DECR1;AKT1;PLCB1;GBA;HPGD;APOA2;APOE;IL1B;LEP;LIPC;LIPE;CYP4F3;STS;PIK3CG;PLA2G2A;PLCB4;PPARA;PPT1;RARRES2;SPP1;SRD5A1;SRD5A2;SULT1E1;SULT2A1;THRA;TNF;TWIST1;AKR1C3;IRS2;ADIPOQ;LIPG	3.22652	6.6273e-16
GOBP_POSITIVE_REGULATION_OF_MAP_KINASE_ACTIVITY	RASGRP1;AKAP13;LRRK2;CSK;IL34;EDN1;EGF;EGFR;ERBB2;EZH2;FGF1;FGF2;DKK1;FLT1;GH1;IL1B;INSR;KITLG;MIF;MST1R;NTF3;NTRK3;PAK1;PDGFA;PDGFRB;PIK3CG;MAP2K7;PSEN1;PTPRC;CCL19;SRC;TDGF1;TGFB1;THBS1;TLR4;TNF;VEGFA;AXIN1	5.79223	6.87052e-16
GOBP_ORGAN_GROWTH	BCL2L11;YAP1;PDLIM5;AKAP13;MAPK14;ADRA1A;CYP19A1;ARX;AGT;DUSP6;S1PR1;EDN1;AKT1;ESR1;FGF2;FGF9;FGFR2;GATA6;FOXP1;GLI1;IGF1;RBPJ;IL7;AR;LEP;LEPR;MIR195;MIR200B;MIR204;SMAD2;MMP13;NOTCH1;PDGFRB;PPARA;BNC2;PRLR;PTEN;RARB;BCL2;RGS4;SLC6A4;SOD1;SOX9;STC1;TGFB2;TGFBR1;WT1;RUNX1;ACVR2B;CDK1	4.43861	8.89385e-16
GOBP_LEUKOCYTE_DEGRANULATION	RASGRP1;F2RL1;FCGR3A;GATA2;HCK;IL4;IL13;ITGAM;LGALS9;LYN;PIK3CD;PIK3CG;BTK;CCR2	7.66983	8.94153e-16
GOBP_NEURON_APOPTOTIC_PROCESS	BCL2L11;PPARGC1A;PARP1;CTNNB1;CX3CR1;AGTR2;F2R;FOXO3;PLXND1;GATA3;GBA;GDNF;TNFRSF21;ANGPT1;NR3C1;HIF1A;APOE;FAS;FASLG;IL10;ITGAM;JUN;KDR;KRAS;MIR181C;MIR200A;MDK;MECP2;MSH2;ATM;NGF;NGFR;NTF3;NTF4;NTRK2;PIK3CA;TREM2;PPT1;AXL;MAP2K7;PSEN1;BAX;RASA1;RB1;CCND1;BCL2;BCL2L1;ROCK1;BDNF;CCL2;CX3CL1;SLC1A1;SOD1;SOD2;BRAF;TERT;TGFB2;TGFB3;TNF;TP53;TYROBP;NDNF;CASP3;NRP1;SEMA3E	3.68341	9.49338e-16
GOBP_PROTEIN_LOCALIZATION_TO_ORGANELLE	DNM1L;CDKN1A;YAP1;TXNIP;CTCF;PHB2;LRRK2;H4-16;COL1A1;PARP1;MAPK14;CSE1L;AGT;EGF;ELAVL1;AKT1;ESR1;EZH2;F2;FGF9;NUP62;SH3BP4;NR5A1;INTU;GLI3;ANGPT1;GSK3B;HK1;HSPA4;HSPD1;IFNG;LEP;LHCGR;LIF;LMNB1;SMAD3;MDM2;MMP12;MSH2;NFKBIA;NGFR;NOTCH1;YBX1;PLK1;MED1;H4C15;VPS11;MAPK8;PSEN1;PTGS2;BAX;RB1;BMP4;BMP7;SOX9;SRC;BRCA2;STAT3;TERF1;TERT;TGFB1;TSPO;TP53;TXN;RGPD2;EZR;XRCC4;BAG6;H4C9;H4C1;H4C4;H4C6;H4C12;H4C…	2.18283	9.6758e-16
GOBP_REGULATION_OF_LYMPHOCYTE_MIGRATION	KLRC4-KLRK1;CXCL13;CD200R1;CRK;AIF1;AKT1;KLRK1;CXCL10;ITGB3;CD200;CCL2;CCL5;CCL21;CXCL12;WNK1;ADAM17;CCR2	8.87813	9.7261e-16
GOBP_CELLULAR_RESPONSE_TO_INSULIN_STIMULUS	CDK4;PARP1;AGT;AHSG;AKT1;FOXO1;SIRT1;MSTN;GHRHR;GSK3B;IGF1R;IGFBP1;IL1B;INSR;LEP;MIR195;ENPP1;PIK3CA;ERRFI1;PPARG;PRKCB;RARRES2;RB1;SHC1;SLC2A4;SMARCC1;SRC;SRD5A1;XBP1;BCAR3;NCOA1;IRS2;ADIPOQ;HDAC9	4.06164	9.96857e-16
GOBP_REGULATION_OF_CELLULAR_COMPONENT_SIZE	SEMA3C;CLCN3;CCR7;CRABP2;CREB1;CSF3;DPYSL2;EDN1;MEGF8;F2RL1;FN1;LPAR3;ALOX15;MTOR;LMOD1;GSK3B;TMOD3;HCK;APOE;IL7R;AQP1;L1CAM;LIMK1;MIR214;MAP2;NGF;PIK3CA;PTEN;SEMA6A;RASA1;BDNF;CCL11;CCL21;CXCL12;SPP1;UCN;VAV1;VEGFA;EZR;WNT7A;ARHGAP28;NRP1;WNT3A;SLIT2;SEMA3E;CDH1	3.08277	1.06549e-15
GOBP_MACROPHAGE_MIGRATION	CD200R1;CSF1;CSF1R;IL34;CX3CR1;CYP19A1;MSTN;LGALS3;MDK;MIF;MMP2;MMP14;CD200;TREM2;MAPK1;MAPK3;RARRES2;CCL2;CCL5;CX3CL1;THBS1;C5;CCR2	9.90899	1.15819e-15
GOBP_REGULATION_OF_PROTEIN_CATABOLIC_PROCESS	CDKN1B;CEBPA;LRRK2;EGFR;AKT1;FOXO1;RNF19A;GBA;MYLIP;GSK3B;ANXA2;IFNG;APOE;IL1B;IL10;SMAD3;SMAD4;MDM2;NFE2L2;NOS2;PLK1;TREM2;VPS11;PSEN1;PSMD2;PSMD10;RELA;ROCK1;SMARCC1;SOX9;STX5;TIMP1;TIMP2;TIMP3;TIMP4;TNF;TNFRSF1B;EZR;VIP;BAG6;AXIN1;IL33;CDH1	3.0993	1.23067e-15
GOBP_REGULATION_OF_OSSIFICATION	OSR2;CCR1;MAPK14;CSF1;S1PR1;AHSG;DKK1;GREM1;INTU;HIF1A;CCN1;RBPJ;LTF;SMAD3;MDK;NOTCH1;ENPP1;WNT4;MAPK1;MAPK3;ANKH;PTGER4;PTN;BCL2;RXRA;SFRP1;BMP4;BMP7;BMPR1B;SOX9;TACR1;TGFB1;TGFB2;TGFB3;TWIST1;VDR;CALCA;ACVR2B	5.64427	1.35932e-15
GOBP_POSITIVE_REGULATION_OF_BINDING	CTHRC1;LRRK2;PARP1;CSF3;CTNNB1;ACE;EGF;ERCC2;PLXND1;POLDIP2;GATA3;GSK3B;ANXA2;HMGB1;IFNG;IGF1;APOE;EIF3E;ITGA2;STMN1;MET;MMP9;NGF;NME1;PON1;PPARG;PSEN1;B2M;RB1;BDNF;BMP4;TERT;TGFB1;CLDN5;TWIST1;TXN;VTN;NRP1;WNT3A;HAND2	4.45935	1.4129e-15
GOBP_NEGATIVE_REGULATION_OF_RESPONSE_TO_BIOTIC_STIMULUS	ADAR;LILRB1;CRK;PARP1;DRD2;AHR;HLA-B;HLA-G;KIR2DL4;KLRC1;ARG1;LGALS9;LTF;MIR21;MMP12;FOXP3;PPARG;HTRA1;SERPING1;NLRC5	5.80373	1.42862e-15
GOBP_NEGATIVE_REGULATION_OF_GROWTH	CDKN1A;CDKN1B;CDKN2A;SEMA3C;AGT;AGTR2;ENO1;ESR2;SIRT1;SH3BP4;GREM1;MSTN;GJA1;FOXP1;HIF1A;INHBA;MIR200B;SMAD3;SMAD4;MAP2;ENPP1;PPARA;PPP2R1A;PPT1;PTEN;SEMA6A;RB1;BCL2;RGS4;BCL6;SFRP1;SFRP2;BMP4;SLC6A4;SLIT3;SPP1;BTG1;TGFB1;TGFB2;TP53;WT1;DCSTAMP;STC2;HYAL2;NRP1;WNT3A;ACVR1B;SCGB3A1;SLIT2;SEMA3E;CDH1	3.68483	1.53774e-15
GOBP_EPITHELIAL_CELL_DEVELOPMENT	CDK6;YAP1;CEBPA;HPSE;CLDN3;EDNRA;AKT1;ESR1;F2RL1;AKR1B1;PLCB1;GATA2;GSK3B;HIF1A;HOXA13;ICAM1;IHH;IL1A;IL1B;AR;KDR;MET;NOTCH1;NOTCH4;FOXP3;PGR;ROBO4;ACTA2;RARB;ROCK1;ROS1;SDC1;BMP4;SOX9;SRC;STC1;CLDN5;TNF;TNFRSF1A;VEGFA;EZR;VIM;WNT7A;CXCR4;COL18A1;CLDN1;S1PR2;ADIPOQ;CLOCK	3.94931	1.55694e-15
GOBP_ACTIN_FILAMENT_BASED_MOVEMENT	ABCC9;NEDD4L;GJA1;KCNQ1;PIK3CA;ACTA2;ROCK1;STC1;ACTN4	5.31008	1.59917e-15
GOBP_ANTIGEN_PROCESSING_AND_PRESENTATION_OF_EXOGENOUS_ANTIGEN	HLA-DPB1;HLA-DQB1;HLA-DRB1;B2M;CD74	11.9668	1.85648e-15
GOBP_POSITIVE_REGULATION_OF_CELLULAR_CATABOLIC_PROCESS	MIR543;BCL2L11;TOB1;NOD1;CEBPA;LRRK2;DAPK1;DCN;EGF;AKT1;FOXO1;FOXO3;SIRT1;SH3BP4;MTOR;RNF19A;GBA;CCDC22;GSK3B;HIF1A;HMGB1;IFNG;IGF1;APOE;IL1B;IL4;IL6;INSR;KDR;ARNT;MDM2;MLH1;ATM;NFE2L2;YBX1;PIK3CB;PLK1;PPARA;MAPK3;PSEN1;PSMD10;PTEN;BAX;ROCK1;TNF;TNFRSF1B;TWIST1;ZFP36;AXIN1;IRS2;BECN1;IL33	2.84363	1.94111e-15
GOBP_NEGATIVE_REGULATION_OF_CYTOKINE_PRODUCTION_INVOLVED_IN_IMMUNE_RESPONSE	LILRB1;ANGPT1;TBX21;APOA2;IL10;ARG1;FOXP3;AXL;BCL6;TGFB1;TGFB2;TGFB3;TNF;TWIST1	17.89	2.02567e-15
GOBP_PROCESS_UTILIZING_AUTOPHAGIC_MECHANISM	BCL2L11;DNM1L;NOD1;DEPP1;PHB2;LRRK2;ADRA1A;DAPK1;DCN;DRD2;AKT1;FOXO1;FOXO3;SIRT1;DAPK2;SH3BP4;MTOR;POLDIP2;PTPN22;GBA;GSK3B;HGF;HIF1A;HMGB1;IFNG;IL4;IL10;KDR;LEP;LEPR;MIRLET7B;MET;ATM;VTA1;PIK3CA;PIK3CB;TREM2;VPS11;MAPK3;MAPK8;PSEN1;BCL2;ROCK1;ATG3;SRC;STAT3;TSPO;TP53;UCHL1;XBP1;MAP1LC3B;CASP3;BECN1;SQSTM1;USP10	2.56406	2.26868e-15
GOBP_CD4_POSITIVE_ALPHA_BETA_T_CELL_DIFFERENTIATION	IL27;MTOR;GATA3;FOXP1;TBX21;ANXA1;HLA-DRB1;HMGB1;IFNG;IL2;IL4;IL6;IL12B;IL12RB1;IL18;LGALS9;MIR21;MYB;FOXP3;IL23A;PTGER4;IL21;BCL6;CCL19;BRAF;STAT3;STAT6;RUNX1;RUNX3;IL18R1;CD86	7.00335	2.51669e-15
GOBP_REGULATION_OF_AXONOGENESIS	UST;PLXNC1;SEMA3C;CRABP2;MEGF8;EPHB2;PLXND1;FN1;LPAR3;GSK3B;L1CAM;LIMK1;MAP2;NGF;NTRK2;PAK1;MAP2K1;PSEN1;PTEN;SEMA6A;BDNF;CXCL12;SPP1;BRAF;THY1;VEGFA;WNT7A;NRP1;WNT3A;SLIT2;SEMA3E;CDH1	4.72285	2.989e-15
GOBP_REGULATION_OF_PATTERN_RECOGNITION_RECEPTOR_SIGNALING_PATHWAY	FCRL3;ESR1;F2RL1;PTPN22;HMGB1;BIRC2;BIRC3;TICAM2;USP17L2;LTF;LYN;MIR17;NINJ1;TREM2;TLR2;TLR3;TLR4;CD14;CD36	5.99742	3.04858e-15
GOBP_T_HELPER_1_TYPE_IMMUNE_RESPONSE	IL27;MTOR;TBX21;ANXA1;HLA-DRB1;HMGB1;IL1B;IL1R1;IL12B;IL12RB1;IL18;IL23A;CCL19;STAT6;TLR4;CCR2;IL18R1;IL33	12.5994	3.05223e-15
GOBP_EAR_DEVELOPMENT	BCL2L11;TSHZ1;CDKN1B;CEBPA;CTHRC1;OSR2;DLX5;EDN1;EDNRA;EPHB2;ESRRB;FGF2;FGF9;FGFR2;GATA2;GATA3;GJB2;GLI3;HOXA13;RBPJ;KCNQ1;HES5;NOTCH1;NTRK3;PAX2;PDGFA;PDGFRB;MAPK1;MAPK3;BCL2;SDC4;BMP4;SOD1;SOX2;SOX9;ZEB1;TGFB2;TGFB3;TWIST1;PAX8;LGR5;WNT3A	3.87598	3.0533e-15
GOBP_SMOOTH_MUSCLE_CELL_PROLIFERATION	CDKN1A;CDKN1B;PPARGC1A;CTNNB1;DNMT1;AGT;HBEGF;S1PR1;EDN1;AIF1;AKT1;FGF2;FGF9;FGFR2;POLDIP2;GJA1;FOXP1;PDCD4;ANG;GPER1;HDAC1;HPGD;ID2;IFNG;IGF1;APOE;IGF1R;IGFBP3;IL6;IL10;IL12B;IL13;IL15;IL18;ITGA2;ITGB3;JUN;HES5;MIR143;MIR145;MIR17;MIR20A;MIR21;MIR214;MIR27B;MIR34A;MMP2;MMP9;MNAT1;MIR135B;NOS3;P2RY6;PDGFRB;PIK3CA;PPARG;PTEN;PTGS2;MIR503;CCL5;CX3CL1;BMP4;SOD2;SRC;TACR1;TERT;TGFB1;TGFB3;THBS1;TLR4;…	4.35375	3.06272e-15
GOBP_REGULATION_OF_VIRAL_PROCESS	ADAR;NR5A2;HLA-DRB1;HMGB1;IFIT1;CXCL8;ISG20;LGALS1;LGALS9;LTF;MIR141;MIR30C1;MBL2;NOTCH1;PPARA;AXL;BCL2;CCL5;SLPI;TNF;ZFP36;CXCR4;HMGA2;CD74	4.60862	3.29185e-15
GOBP_REGULATION_OF_ANIMAL_ORGAN_MORPHOGENESIS	PHB2;CTHRC1;CSF1;CTNNB1;AGT;AGTR2;EDN1;FGF1;FGF2;DKK1;GATA3;GREM1;GDNF;HGF;HOXA11;AR;TACSTD2;NGFR;TNFRSF11B;PAX2;PDGFA;WNT4;SFRP1;SFRP2;BMP4;BMP7;SNAI2;SOX9;TNF;VEGFA;WNT7A;WT1;PAX8;FZD7;WNT3A;CDC42	5.30892	3.33292e-15
GOBP_CELLULAR_EXTRAVASATION	OLFM4;CRK;SIRPA;CX3CR1;PLCB1;ICAM1;IL1R1;ITGB1;LEP;MDK;PIK3CD;PIK3CG;PTGER4;ROCK1;CCL2;CCL21;CCL25;CX3CL1;CXCL12;SELE;SELL;THY1;TNF;CCR2;VCAM1;CD47	7.88671	3.5316e-15
GOBP_LEUKOCYTE_ACTIVATION_INVOLVED_IN_INFLAMMATORY_RESPONSE	LRRK2;CX3CR1;AIF1;IFNG;IFNGR1;IL4;IL6;IL13;ITGAM;JUN;MIR142;MIR181C;ATM;TREM2;PTPRC;CX3CL1;TLR2;TLR3;TNF;TYROBP;TRPV1;IL33	11.4679	3.54724e-15
GOBP_EPITHELIAL_CELL_APOPTOTIC_PROCESS	CDKN1B;PAK4;ADAR;YAP1;DNMT3A;EDNRA;ESR1;FGA;FOXO3;GATA2;GATA3;PDCD4;ANGPT1;GPER1;HLA-G;ICAM1;IGF1R;FASLG;IL4;IL6;IL10;IL11;IL13;KDR;MIR126;MIR132;MDK;NFE2L2;MIR375;SERPINE1;PIK3CG;PPARA;BAX;RB1;BCL2;BCL2L1;CCL2;BRAF;TEK;TERT;THBS1;TNF;ZFP36;NDNF;CASP3;AKR1C3;HAND2;CD40LG	5.03109	3.56591e-15
GOBP_CELLULAR_RESPONSE_TO_INORGANIC_SUBSTANCE	ABCB6;CDKN1B;CEBPA;CHUK;LRRK2;CREB1;CRK;PARP1;CYP1A1;CYP1A2;EDN1;EGFR;AKT1;FOXO1;FOS;ALOX15;SLC40A1;HSD17B1;AQP1;AQP2;JUN;MMP3;MMP9;MIR342;NFE2L2;OGG1;SERPINF1;MAPK1;MAPK3;MAPK8;B2M;PTGS2;SLC1A1;SOD1;BRAF;SYT1;TSPO;AKR1C3;BECN1;CLDN1;CDH1	3.80145	3.64756e-15
GOBP_NEGATIVE_REGULATION_OF_COAGULATION	CPB2;EDN1;F2;FGA;ANXA2;APOE;KNG1;NOS3;SERPINE1;SERPINB2;PDGFA;PDGFRA;PLAU;PLG;THBS1;SERPING1;VTN	10.5878	3.76973e-15
GOBP_BIOMINERALIZATION	ADA;CFTR;OSR2;CCR1;COL1A1;S1PR1;AHSG;ERCC2;FGFR2;HEY1;ALOX15;GREM1;HIF1A;IGF1;CCN1;LEP;LOX;LTF;SMAD3;MMP13;NOS3;NOTCH1;NT5E;ENPP1;WNT4;PPARA;ANKH;PTGS2;PTN;NECTIN1;ROCK1;RXRA;BMP4;BMP7;SLC20A1;BMPR1B;SOX9;SPP1;TGFB1;TGFB3;KLF10;TWIST1;VDR;ACVR2B	4.31965	3.94564e-15
GOBP_NEGATIVE_REGULATION_OF_NEURON_DEATH	PPARGC1A;LRRK2;CD200R1;CSF1;CSF3;CTNNB1;CX3CR1;EPO;AKT1;F2R;PLXND1;SIRT1;GBA;GDNF;ANGPT1;GSK3B;HIF1A;APOE;IL10;IL13;JUN;KDR;KIR3DL2;KRAS;MIR181C;MIR200C;MDK;MECP2;CD200;MSH2;NGF;NTF3;NTF4;NTRK2;SERPINF1;PIK3CA;PPARA;PPT1;AXL;PSEN1;BAX;RASA1;CCND1;BCL2;BCL2L1;ROCK1;BDNF;CCL2;CX3CL1;SLC1A1;SOD1;SOD2;BRAF;TERT;TGFB3;TNFRSF1B;UCN;NDNF;NRP1;WNT3A;SEMA3E	3.88142	4.93305e-15
GOBP_REGULATION_OF_B_CELL_PROLIFERATION	ADA;CDKN1A;FCRL3;CTLA4;AHR;EPHB2;TNFRSF21;IL2;IL4;IL7;IL10;IL13;LYN;MIF;ATM;PRLR;PTEN;PTPRC;IL21;BCL2;BCL6;BTK;TLR4;TYROBP;CASP3;CARD11;IRS2;WNT3A;CD74	8.58945	5.16124e-15
GOBP_ESTABLISHMENT_OR_MAINTENANCE_OF_CELL_POLARITY	UST;CCR7;CRK;GATA3;GJA1;ANK1;GSK3B;IGF1R;AQP1;ILK;ITGB1;HES5;RHOC;RHOG;PLK1;RHOF;ACTB;ROCK1;CCL19;CCL21;FSCN1;TEK;EZR;WNT7A;CDC42	3.71069	5.29743e-15
GOBP_NUCLEOBASE_CONTAINING_SMALL_MOLECULE_METABOLIC_PROCESS	ADA;DNM1L;MTCO2P12;PPARGC1A;SMPDL3A;LRRK2;CRMP1;PARP1;DPYSL2;ENO1;FMO2;MTOR;GALT;HIF1A;HK1;ACACA;HPRT1;IFNG;IGF1;IL4;IDO1;INSR;ARNT;NME1;NOS1;NOS2;NOS3;NT5E;OGG1;ENPP1;ENPP3;TREM2;PPARA;PPT1;MAPK1;PSEN1;STAT3;SULT1E1;SULT1A1;SULT2A1;TGFB1;TSPO;TP53;CARD11;SUCLG2;TECR;ENTPD1;NCOR1	2.36526	6.20969e-15
GOBP_NATURAL_KILLER_CELL_ACTIVATION	KLRC4-KLRK1;RASGRP1;FCGR3A;KLRK1;NCR3;PTPN22;GATA3;IFNA1;IFNA13;IL2;IL2RB;IL12B;IL15;IL18;KLRC1;LEP;IL23A;PIK3CD;AXL;PTPRC;TYK2;TYROBP;BAG6;ULBP3;ULBP2;IL18R1	6.22918	6.30875e-15
GOBP_REGULATION_OF_JNK_CASCADE	RASGRP1;NOD1;CCR7;CRK;SIRPA;CCN2;EGFR;F2RL1;PLCB1;PTPN22;PDCD4;GSTP1;HMGB1;IGF1R;IL1A;IL1B;MAP2K7;CCL19;CCL21;SFRP1;SFRP2;TLR3;TLR4;TNF;WNT7A;AXIN1;FZD7;HDAC3;NCOR1;RASSF2	4.92713	6.43675e-15
GOBP_SULFUR_COMPOUND_METABOLIC_PROCESS	UST;HPSE;CTH;DCN;EDNRA;HPGDS;ANGPT1;GPX4;GSTM1;GSTM2;GSTP1;GSTT1;ACACA;GSTK1;MIR21;MAT2A;NFE2L2;ENPP1;PPT1;SLC1A1;SOD1;SOD2;SULT1E1;SULT1A1;SULT2A1;PAX8;NDNF;SUCLG2;CHST3;TECR;HS3ST3B1	3.11777	6.8288e-15
GOBP_NEGATIVE_REGULATION_OF_ORGANELLE_ORGANIZATION	LILRB2;YAP1;CIB1;PRRT2;LRRK2;PARP1;DUSP1;S1PR1;ERCC1;AKT1;FKBP4;LMOD1;TMOD3;HGF;BIRC5;IAPP;IGF1;STMN1;LIF;MIR20A;MIR21;MIR214;TACSTD2;SMAD4;MAP2;MET;MNAT1;ATM;PIK3CA;PLK1;PPARG;PSMD10;BCL2L1;BMP4;BMP7;SRC;BRCA1;TERF1;TSPO;TP53;XRCC1;XRCC3;ARHGAP28;STN1;BECN1;CCNB1;SLIT2	3.00615	7.30302e-15
GOBP_ANTIGEN_PROCESSING_AND_PRESENTATION_OF_EXOGENOUS_PEPTIDE_ANTIGEN	HLA-DPB1;HLA-DQB1;HLA-DRB1;B2M;CD74	14.3125	7.43236e-15
GOBP_CHRONIC_INFLAMMATORY_RESPONSE	CXCL13;CYP19A1;IL4;IL10;IDO1;LTA;FOXP3;CCL5;CCL11;THBS1;TNF;VCAM1	56.3153	7.58238e-15
GOBP_PROTEOLYSIS_INVOLVED_IN_PROTEIN_CATABOLIC_PROCESS	CEBPA;LRRK2;CTNNB1;EGF;AKT1;NEDD4L;SIRT1;RNF19A;GBA;CCDC22;MYLIP;GSK3B;TBX21;BIRC2;IFI27;APOE;USP17L2;MDM2;NFE2L2;HERC5;PLK1;TREM2;PSEN1;PSMD2;PSMD9;PSMD10;PTEN;SKP2;SMARCC1;TGFB1I1;UCHL1;XBP1;BAG6;RNF34;AXIN1;SQSTM1;IL33;USP10;MTA1;CLOCK	2.23917	7.58853e-15
GOBP_NEGATIVE_REGULATION_OF_PROTEIN_SERINE_THREONINE_KINASE_ACTIVITY	CDKN1A;CDKN1B;CDKN2A;CEBPA;AGT;DUSP1;AKT1;SIRT1;NUP62;PTPN22;GBA;PDCD4;GSTP1;APOE;IL1B;LYN;MIR20A;MIR34A;PIK3CB;PLK1;PPARG;PTEN;RB1;SFRP1;SFRP2;BMP4;BMP7;NR2F2;UCHL1;CASP3;HYAL2;ADIPOQ	5.43899	7.63324e-15
GOBP_ENDOTHELIAL_CELL_MIGRATION	PDCD6;CIB1;CXCL13;MAPK14;CYP1B1;DCN;DPP4;AGT;AGTR2;EDN1;EGF;EPHB4;AKT1;ETS1;FGF1;FGF2;PLXND1;SIRT1;GATA2;GATA3;GREM1;FOXP1;ANGPT1;ANGPT2;ANXA1;HIF1A;HMGB1;NR4A1;APOE;ITGB1;ITGB3;KDR;MIR10B;MIR126;MIR132;MIR143;MIR20A;MIR200A;MIR200B;MIR200C;MIR204;MIR21;MIR210;MIR22;MIR27B;MIR29C;MIR30A;MIR31;MECP2;MET;MIR135B;MIR342;NFE2L2;NOS3;NOTCH1;SERPINF1;PIK3CA;PIK3CB;PIK3CD;PIK3CG;DLL4;PPARG;PRKCA;PTEN;PT…	3.36997	7.7398e-15
GOBP_LIPID_STORAGE	CRP;TTC39B;SIRT1;GBA;APOE;IL1B;IL6;ITGAV;ITGB3;LEP;MIR10B;MIR34A;NFKB1;NFKBIA;ENPP1;TREM2;PPARA;PPARG;TNF;C3;CD36	6.93265	7.75318e-15
GOBP_HOMOTYPIC_CELL_CELL_ADHESION	MYL9;FGA;FN1;IL6;ILK;ITGB3;JAK1;LYN;PDGFRA;PIK3CB;PIK3CG;PRKCA;ACTB;CCL5;ACTN1;WNT3A	6.36248	8.95121e-15
GOBP_AMINO_ACID_TRANSPORT	AGT;SLC7A8;SH3BP4;GJA1;ITGB1;ARG1;LEP;NTRK2;PSEN1;RGS4;SLC1A1;TNF;TRH;TRPV1;SLC38A1;SFXN1	4.74382	9.72702e-15
GOBP_REGULATION_OF_T_CELL_RECEPTOR_SIGNALING_PATHWAY	ADA;CD226;CCR7;PTPN22;LGALS3;SH2D1A;RELA;THY1;EZR;CARD11;BCL10	12.6971	9.80543e-15
GOBP_POSITIVE_CHEMOTAXIS	DEFB4A;S1PR1;F2RL1;F3;FGF2;FPR2;GDNF;ANGPT1;ANGPT2;HGF;HMGB1;CXCL8;IL16;CXCL10;ITGA2;KDR;LGALS3;SMAD3;MET;MIF;NTF3;NTRK3;PGF;CCL5;CCL16;CX3CL1;CXCL12;BMP4;VEGFA;VEGFC;CASR;NRP1;ARTN	8.77568	9.93427e-15
GOBP_REGULATION_OF_TRANSPORTER_ACTIVITY	ABCC9;CFTR;CHRM3;PHB2;CRH;CRHR1;CNIH3;DAPK1;DRD2;EDN1;EDNRA;EPHB2;EPO;NEDD4L;REM1;GSTM2;APOA2;IFNG;ITGB1;KCNQ1;MIR17;MIR200C;MIR30C1;MIR33A;MIR34A;MMP9;NOS1;OPRM1;P2RY6;TREM2;PON1;PPARG;MIR451A;BCL2;ACTB;RXRA;CCL2;WNK1;MIR33B;TRPC6;TWIST1;CCR2;UTRN;ACTN4;ADIPOQ	3.14358	1.06791e-14
GOBP_CELLULAR_RESPONSE_TO_VIRUS	ADAR;PHB2;CHUK;MAPK14;HIF1A;BIRC2;BIRC3;IFNA1;IFNA13;IFNG;IFNGR1;IL6;CXCL10;JAK1;USP17L2;LGALS9;MIR21;MIR30C1;SMAD3;MMP12;NFKB1;BAX;IL21;CCL5;CCL19;TLR3;TYK2	5.51245	1.14769e-14
GOBP_IMPORT_ACROSS_PLASMA_MEMBRANE	ABCC9;AGT;AKT1;SLC7A8;IFNG;ITGB1;KCNQ1;ARG1;MIR200C;MIR210;PSEN1;RGS4;SLC1A1;WNK1;SLC2A1;SLC2A3;THBS1;TNF;TRPV1;SLC38A1;IRS2;MS4A1;CD36	3.95202	1.32403e-14
GOBP_GLYCOPROTEIN_METABOLIC_PROCESS	UST;HPSE;GALNT6;CCR7;CTNNB1;DCN;HBEGF;TET3;EXTL3;PLCB1;GALNT3;HIF1A;IGF1;IHH;IL15;LEP;MIR17;MIR20A;MIR31;MMP12;ST6GALNAC1;SULF2;PSEN1;BCL2;CCL19;CCL21;GORASP1;BMPR1B;BTK;NDNF;TET1;MAGT1;IL33;CHST3;HS3ST3B1	2.86472	1.54327e-14
GOBP_AMINOGLYCAN_METABOLIC_PROCESS	UST;HPSE;DCN;EDNRA;EGF;FGF2;ANGPT1;HAS1;IL1B;IL15;NFKB1;PDGFRB;TGFB1;NDNF;HYAL2;CHST3;CD44;HS3ST3B1	5.01662	1.54564e-14
GOBP_REGULATION_OF_T_CELL_APOPTOTIC_PROCESS	ADA;BCL2L11;KIFAP3;CD274;HIF1A;IL7R;IDO1;LGALS3;LGALS9;PDCD1;BCL2;CCL5;BMP4;TP53	13.5171	1.55322e-14
GOBP_REGULATION_OF_NITRIC_OXIDE_METABOLIC_PROCESS	KLRC4-KLRK1;SIRPA;CX3CR1;AGT;AGTR2;EDN1;AIF1;AKT1;KLRK1;IFNG;IL1B;IL10;INSR;MIR132;SMAD3;PTGS2;SOD2;TSPO;TLR4;TNF;TRPV1;CD36;CD47	8.53171	1.6447e-14
GOBP_ADENYLATE_CYCLASE_MODULATING_G_PROTEIN_COUPLED_RECEPTOR_SIGNALING_PATHWAY	AKAP13;CHRM3;UCN3;CNR1;ADM;CRHR1;CRHR2;ADRA1A;ADRA2B;DRD2;S1PR1;EDN1;EDNRA;LPAR3;FPR1;FPR2;FSHR;GHRH;GHRHR;GPER1;IAPP;CXCL10;ITGB3;LHCGR;CXCL9;OPRM1;PF4;PRKCA;PTGER2;PTGER4;PTGFR;RXFP1;SSTR4;VIP;CALCA;CASR;UCN2;LPAR2;S1PR2	3.54852	1.68302e-14
GOBP_DEVELOPMENTAL_CELL_GROWTH	SEMA3C;PDLIM5;AKAP13;CRABP2;ADRA1A;CTNNB1;DPYSL2;AGT;EDN1;EDNRA;MEGF8;NEDD4L;FN1;LPAR3;FOXP1;GSK3B;IGF1;APOE;ITGB1;L1CAM;LIMK1;MIR195;MAP2;NGF;NRN1;PPARA;SEMA6A;RGS4;BDNF;CXCL12;SLIT3;SOX9;SPP1;SYT1;VEGFA;CXCR4;NRP1;WNT3A;SLIT2;SEMA3E;CDH1	3.69309	1.71403e-14
GOBP_DENDRITIC_CELL_ANTIGEN_PROCESSING_AND_PRESENTATION	NOD1;CCR7;HLA-DRB1;CCL19;CCL21;THBS1;CD68;CD74	147.81	1.86014e-14
GOBP_REGULATION_OF_TRANS_SYNAPTIC_SIGNALING	LILRB2;PRRT2;LRRK2;CNR1;CRHR2;ADRA1A;CX3CR1;ACE;DRD2;AGT;EDN1;EPHB2;DKK1;PLCB1;RNF19A;GPER1;GSK3B;APOE;IL1B;ITGB1;KISS1;KRAS;MIR142;MECP2;MME;MIR342;NGF;NTF3;NTF4;NTRK2;OXTR;P2RX3;PRKCB;MAPK1;PSEN1;RETN;PTEN;PTGS2;PTN;PTPRD;RGS4;BDNF;S100B;CCL2;CX3CL1;SLC1A1;SLC6A4;SNCG;SRC;BRAF;SYP;SYT1;TACR1;TNF;CCR2;TYROBP;UCN;WNT7A;CA2;SLC38A1;SQSTM1;WNT3A;S1PR2;ADIPOQ;CDH1	2.71549	1.91147e-14
GOBP_NEGATIVE_REGULATION_OF_INTERLEUKIN_2_PRODUCTION	GATA3;TBX21;MIR181C;FOXP3;PTPRC;EZR;ZFP36	22.3129	2.08489e-14
GOBP_MITOTIC_CELL_CYCLE_PROCESS	KIF20A;CDK4;CDK6;CDKN1A;CDKN1B;CDKN2A;CDKN3;KHDRBS1;DCTN6;CFL1;PHB2;CKS1B;CYP1A1;DUSP1;EDN1;EGF;EGFR;EIF4EBP1;AIF1;ERCC2;AKT1;ESRRB;EZH2;FANCD2;FOXM1;PLCB1;NUP62;POLDIP2;GJA1;TMOD3;ANXA1;HOXA13;APEX1;BIRC5;ID2;IGF1;IL1A;IL1B;INHBA;INSR;ITGB1;RHOC;STMN1;MIR195;MIR214;MIR29C;MIR30C2;MDM2;MECP2;MNAT1;MSH2;MUC1;MYC;ATM;PCNA;RMDN1;PDGFRB;PLK1;POLE;PPP2R1A;PRKCA;PRKCB;PTEN;MIR451A;RASA1;RB1;CCND1;BCL2;…	2.21168	2.08513e-14
GOBP_T_CELL_APOPTOTIC_PROCESS	ADA;BCL2L11;AKT1;KIFAP3;GLI3;CD274;HIF1A;FAS;IL2RA;FASLG;IL7R;IDO1;LGALS3;LGALS9;PDCD1;BAX;BCL2;CCL5;BMP4;TP53;BCL10	9.52828	2.0955e-14
GOBP_CELLULAR_MODIFIED_AMINO_ACID_METABOLIC_PROCESS	DIO2;SARDH;GATA3;GATM;HPGDS;GPX4;GSTM1;GSTM2;GSTP1;GSTT1;GSTK1;NFE2L2;MED1;SLC1A1;SOD1;SOD2;SULT2A1;PAX8	4.17019	2.17378e-14
GOBP_TYPE_2_IMMUNE_RESPONSE	GATA3;TBX21;ANXA1;IL4;IL6;IL10;IL18;IDO1;ARG1;BCL6;STAT6;CCR2;IL33;CD86;CD74	14.5423	2.3576e-14
GOBP_REGULATION_OF_EPITHELIAL_CELL_APOPTOTIC_PROCESS	CDKN1B;PAK4;ADAR;YAP1;ESR1;FGA;FOXO3;GATA2;GATA3;PDCD4;ANGPT1;GPER1;HLA-G;ICAM1;IGF1R;FASLG;IL4;IL6;IL10;IL11;IL13;KDR;MIR126;MIR132;MDK;NFE2L2;MIR375;SERPINE1;PPARA;BAX;RB1;BCL2;CCL2;BRAF;TEK;TERT;THBS1;TNF;ZFP36;NDNF;AKR1C3;HAND2;CD40LG	5.51677	2.39194e-14
GOBP_POSITIVE_REGULATION_OF_TRANSMEMBRANE_TRANSPORT	CFTR;MAPK14;AGT;EDN1;EDNRA;EPHB2;AKT1;F2;F2R;GH1;GPER1;GSTM2;IFNG;IGF1;IL13;CXCL10;INSR;ITGB1;KCNQ1;LHCGR;MIR21;MIR210;CXCL9;NFE2L2;NOS1;P2RX3;P2RX5;P2RY6;TREM2;PSEN1;BAX;CCL2;CX3CL1;WNK1;BRAF;TERT;THY1;C3;TRPC6;CCR2;CA2;ACTN4;SLC38A1;IRS2;CD19;MS4A1;ADIPOQ	3.60754	2.41598e-14
GOBP_FAT_CELL_DIFFERENTIATION	YAP1;CARM1;CEBPA;PPARGC1A;CREB1;MAPK14;DIO2;AKT1;FOXO1;PLCB1;SIRT1;GATA2;GATA3;GPER1;NR4A1;ID2;IL6;IL11;LEP;MIR17;MIR21;MIR27B;SMAD3;PDGFRA;ENPP1;PPARG;MED1;RETN;PTGS2;RARRES2;CCND1;MIR483;SFRP1;SFRP2;SLC2A4;BMP7;SNAI2;SOD2;SULT1E1;TGFB1;TGFB1I1;TNF;XBP1;ZFP36;HMGA2;AXIN1;WNT3A;ADIPOQ;GDF3	3.54784	2.72753e-14
GOBP_REGULATION_OF_MIRNA_METABOLIC_PROCESS	DDX5;EGR1;ETS1;FGF2;FOXO3;FOS;GATA2;GATA3;GATA6;NR3C1;HIF1A;IL10;JUN;SMAD3;SMAD4;MYB;MYC;NFKB1;NGFR;POU5F1;PPARA;PPARG;PRL;RELA;BMP4;SOX9;STAT3;TERT;TGFB1;TGFB2;TNF;TP53;WT1	7.46445	2.74248e-14
GOBP_PROTEIN_LOCALIZATION_TO_CELL_PERIPHERY	CIB1;AGR2;CSK;DPP6;EGFR;EPHA3;EPHB2;AKT1;NECTIN3;GPER1;ANK1;IFNG;AR;ITGB1;RHOG;LGALS3;MMP14;PLK1;TREM2;BCL2L1;ACTB;ROCK1;GORASP1;SLC1A1;BSG;TGFB1;TNF;TNFRSF1A;EZR;SKAP1;SQSTM1;WNT3A;ADIPOQ;CDH1	3.0407	2.96364e-14
GOBP_POSITIVE_REGULATION_OF_LYMPHOCYTE_MIGRATION	CXCL13;AIF1;CXCL10;ITGB3;CCL5;CCL21;CXCL12;WNK1;ADAM17;CCR2	12.8054	3.15015e-14
GOBP_REGULATION_OF_LYMPHOCYTE_APOPTOTIC_PROCESS	ADA;BCL2L11;KIFAP3;FOXP1;CD274;HIF1A;IL2;IL7R;IL10;IDO1;LGALS3;LGALS9;LYN;MIF;PDCD1;PTEN;BAX;BCL2;BCL6;CCL5;BMP4;BTK;TP53;IRS2;BCL10;CD74	8.72016	3.17395e-14
GOBP_LYMPHOCYTE_APOPTOTIC_PROCESS	ADA;BCL2L11;AKT1;KIFAP3;FOXP1;TNFRSF21;GLI3;CD274;HIF1A;FAS;IL2;IL2RA;FASLG;IL7R;IL10;IDO1;LGALS3;LGALS9;LYN;MIF;PDCD1;PTEN;BAX;BCL2;BCL6;CCL5;BMP4;BTK;TP53;IRS2;BCL10;CD74	7.06504	3.21056e-14
GOBP_POSITIVE_REGULATION_OF_T_CELL_MIGRATION	CXCL13;AIF1;CXCL10;ITGB3;CCL5;CCL21;CXCL12;WNK1;ADAM17;CCR2	15.8595	3.3903e-14
GOBP_MALE_SEX_DIFFERENTIATION	BCL2L11;ZFP42;CTNNB1;CYP1B1;ACE;ERCC1;ESR1;FGF9;FKBP4;FSHB;FSHR;NR5A1;GATA3;GATA6;AMH;AMHR2;HOXA10;HOXA11;HOXA13;HSD17B3;IL1A;INHA;INHBA;INSR;AR;LHB;LHCGR;SMAD4;MAS1;KITLG;MMP14;MSH2;PDGFA;PDGFRA;PDGFRB;WNT4;BAX;CCND1;BCL2;REN;BCL2L1;SDC1;SFRP1;SFRP2;SOX9;SOX15;SRD5A1;SRD5A2;SRY;TCF21;TGFB2;TGFBR1;TLR3;WT1;UTF1;AKR1C3;TNFSF10	4.26786	3.41372e-14
GOBP_ENDODERM_FORMATION	CTNNB1;DUSP1;DUSP2;DKK1;FN1;GATA6;INHBA;ITGA5;ITGAV;LAMB1;SMAD2;MMP2;MMP9;MMP14;POU5F1;MAP2K1;SOX2;HNF1B;VTN;NANOG;HMGA2	9.22069	3.59561e-14
GOBP_MESENCHYME_MORPHOGENESIS	HEY1;RBPJ;SMAD2;SMAD3;SMAD4;MDM2;MYC;NOS3;NOTCH1;ACTA2;BMP4;BMP7;SNAI2;SNAI1;SOX9;TGFB1;TGFB2;TGFB3;TGFBR1;TWIST1;WNT3A	9.22069	3.59561e-14
GOBP_GLIAL_CELL_ACTIVATION	LRRK2;CX3CR1;AIF1;IFNG;IFNGR1;IL1B;IL4;IL6;IL13;ITGAM;JUN;MIR142;MIR181C;ATM;TREM2;PSEN1;PTPRC;CX3CL1;TLR2;TLR3;TNF;TYROBP;TRPV1;IL33	9.82862	3.87711e-14
GOBP_OSTEOCLAST_DIFFERENTIATION	LILRB1;CCR1;CREB1;MAPK14;CSF1;CSF1R;CTNNB1;FBN1;FOS;MTOR;FSHB;FOXP1;ANXA2;IAPP;IFNG;IL4;IL12B;IL17A;LTF;TNFRSF11B;IL23A;TREM2;SFRP1;SRC;KLF10;TLR3;TLR4;TNF;TYROBP;DCSTAMP;RASSF2	5.96455	3.89874e-14
GOBP_DIGESTIVE_SYSTEM_DEVELOPMENT	ADA;YAP1;AGR2;CTNNB1;CYP1A1;MEGF8;EGFR;FGF9;FGFR2;GATA6;GLI1;GLI3;HIF1A;HOXA13;ID2;IHH;CXCL8;INSR;KCNQ1;SMAD2;SMAD3;NOTCH1;OXTR;PDGFRA;RARB;RARRES2;RB1;BCL2;SFRP1;SFRP2;BMP4;SOX9;SRC;HNF1B;TCF21;TGFB2;TGFB3;TNF;ACVR2B	4.71885	4.18746e-14
GOBP_ACTIN_CYTOSKELETON_REORGANIZATION	CLDN3;CSF1R;CSF3;S1PR1;ANXA1;HCK;MDK;NTF3;NTRK3;PAK1;PDGFRA;SHC1;TEK;EZR;NRP1;S1PR2;SEMA3E;CDC42	5.5214	4.98579e-14
GOBP_RESPONSE_TO_STARVATION	CDKN1A;PPARGC1A;UCN3;LRRK2;COMT;ADM;ALB;FOXO1;FOXO3;SIRT1;FOS;MTOR;GBA;IGF1R;FAS;NFE2L2;WNT4;KRT20;PPARA;UGT1A1;MAPK1;MAPK3;MAPK8;BCL2;SFRP1;SLC2A1;SRD5A1;SSTR1;KLF10;TP53;XBP1;ZFP36;MAP1LC3B;AKR1C3;BECN1	3.79768	5.01916e-14
GOBP_REGULATION_OF_TISSUE_REMODELING	CSF1R;CSK;AGT;S1PR1;FSHB;GREM1;IAPP;IL2;IL6;IL12B;IL15;IL18;ITGB3;LEP;LEPR;MIR143;MIR17;MIR195;MIR20A;MIR214;MIR27B;MIR34A;MDK;TNFRSF11B;IL23A;PPARG;PRKCA;IL21;ROCK1;SFRP1;SPP1;SRC;TGFB1;TP53;CALCA;DCSTAMP;RUNX1;HAND2	6.59801	5.31386e-14
GOBP_HEPATICOBILIARY_SYSTEM_DEVELOPMENT	ADA;CEBPA;CPB2;CYP1A1;EZH2;FGF1;CADM1;GATA6;GLI1;GLI3;ANXA1;HGF;IHH;IL6;IL10;ITGA2;JUN;ARG1;SMAD3;MDK;MET;NOTCH1;PCNA;PIK3CA;WNT4;UGT1A1;MED1;PTN;CCND1;RELA;SOD2;SOX9;SRD5A1;HNF1B;TNF;VTN;XBP1;WNT3A;CLDN1	4.67156	5.52529e-14
GOBP_BONE_MINERALIZATION	OSR2;CCR1;S1PR1;AHSG;ERCC2;FGFR2;ALOX15;GREM1;HIF1A;IGF1;CCN1;LEP;LOX;LTF;SMAD3;MMP13;ENPP1;WNT4;ANKH;PTGS2;PTN;RXRA;BMP4;BMP7;BMPR1B;SOX9;TGFB1;TGFB3;KLF10;TWIST1;VDR;ACVR2B	5.1758	5.63555e-14
GOBP_POSITIVE_REGULATION_OF_GROWTH	YAP1;CIB1;AGR2;CRABP2;CREB1;MAPK14;CSF1;ARX;DRD2;HBEGF;EDN1;MEGF8;EGFR;ERBB2;AKT1;EXTL3;F2;FGF2;FGF9;FGFR2;PLCB1;NEDD4L;FN1;LPAR3;MTOR;GATA6;GH1;GHRH;GHRHR;GLI1;IGF1;IGFBP1;RBPJ;IL2;IL7;IL9;INSR;L1CAM;LEP;LIMK1;MIR204;MMP14;NGF;NOTCH1;PSMD10;CXCL16;BCL2;BDNF;CXCL12;SFRP1;SFRP2;SOX15;SYT1;ADAM17;TGFB2;TGFBR1;UCN;VEGFA;EZR;WT1;ZP3;CXCR4;NRP1;WNT3A;CDK1;CDC42	3.38713	5.92583e-14
GOBP_MONOSACCHARIDE_METABOLIC_PROCESS	PPARGC1A;MAPK14;ENO1;AKT1;FOXO1;AKR1B1;SIRT1;GALT;NR3C1;HK1;FOXA2;IGF1;IGFBP3;INSR;KCNQ1;LEP;LEPR;MIR210;MST1;PIK3CA;PPARA;SLC2A1;SLC2A3;SRC;BRS3;TFF3;TNF;TP53;IRS2;ADIPOQ	3.4716	5.98802e-14
GOBP_DIGESTION	PPARGC1A;CHRM3;UCN3;AKR1C1;AKR1C2;ARX;APOA2;AQP1;IL17A;AQP5;KCNQ1;LEP;MDK;MUC2;MUC4;OXTR;WNK1;SOX9;SST;TACR1;TFF3;TLR4;UCN;VDR;EZR;TRPV1;UCN2;CD36	4.75479	6.56842e-14
GOBP_T_CELL_SELECTION	CCR7;MTOR;GATA3;GLI3;TBX21;IL6;IL12B;IL12RB1;IL15;FOXP3;IL23A;PTPRC;BCL2;BRAF;STAT3;STAT6;CARD11;CD74	10.1754	7.07799e-14
GOBP_REGULATION_OF_MUSCLE_CONTRACTION	ADA;MYL9;CHRM3;ADRA1A;CCN2;ADRA2B;EDN1;ENO1;F2R;GPER1;GSTM2;NR4A1;ITGA2;KCNQ1;MIR143;MIR145;MIR200C;MIR21;NOS1;OXTR;PIK3CG;PTGS2;SOD1;STC1;TACR1;UCN;CALCA	4.1652	7.12978e-14
GOBP_STEM_CELL_DIFFERENTIATION	PDCD6;CDK6;YAP1;SEMA3C;MAPK14;CTNNB1;ACE;EDN1;EDNRA;ERCC2;ESR1;ESRRB;EZH2;FGF2;FGFR2;FN1;GATA6;GREM1;GDNF;GSK3B;DNMT3L;HDAC1;HDAC2;HIF1A;HOXB4;RBPJ;ITGB1;HES5;LIF;TACSTD2;EPCAM;SMAD4;KITLG;NFE2L2;NOTCH1;PAX2;PDGFRA;MED1;MAPK1;MAPK3;SEMA6A;PTN;PTPRC;BCL2;SFRP1;SFRP2;BMP4;BMP7;SNAI2;SOX9;STAT3;HNF1B;TGFB2;TP53;TWIST1;WNT7A;ZFP36;HMGA2;NRP1;WNT3A;MTA1;MTA2;HAND2;SEMA3E;CDC42	3.45305	7.26488e-14
GOBP_NIK_NF_KAPPAB_SIGNALING	NOD1;PHB2;CHUK;EDN1;EGFR;AKT1;DICER1;PTPN22;GREM1;PDCD4;BIRC2;BIRC3;IL1B;IL12B;IL18;ILK;LGALS9;MIR132;MIR204;MIR21;MIR27B;MIR30C2;MAS1;NR3C2;NFKBIA;IL23A;TREM2;RELA;CCL19;BMP7;TLR2;TLR3;TLR4;TNF;EZR;ACTN4;IL18R1;CD14;CD86;RASSF2	4.62521	7.26851e-14
GOBP_COLLAGEN_METABOLIC_PROCESS	MMP24;COL1A1;CCN2;F2;F2R;HDAC2;HIF1A;IHH;IL6;INHBA;ITGA2;ITGB1;ARG1;MIR145;MIR21;MMP1;MMP2;MMP3;MMP7;MMP9;MMP12;MMP13;MMP14;PDGFRB;ERRFI1;WNT4;BMP4;TGFB1;TGFB3;UCN;VIM;RUNX1;SERPINH1;CREB3L1	5.60547	7.45518e-14
GOBP_REGULATION_OF_DNA_METABOLIC_PROCESS	CDKN1A;PPARGC1A;BRD8;PARP1;CTNNB1;CYP1B1;EGF;EGFR;ERCC1;ERCC2;AKT1;ERCC6;FGF2;FOXM1;SIRT1;GATA3;GREM1;ANKRD1;GLI1;MSH6;DNMT3L;TBX21;H2AX;HGF;HMGB1;IGF1R;IL2;IL4;IL6;IL7R;IL10;MIR29C;MAS1;MECP2;MLH1;MSH2;MYC;ATM;OGG1;FOXP3;PCNA;PDGFA;PDGFRB;PIK3CA;PPP2R1A;MAPK1;MAPK3;MAP2K7;PTPRC;BAX;ACTB;BCL6;SMOC2;SMARCC1;SRC;BRCA1;BRCA2;STAT6;TERF1;TFDP1;TGFB1;TNF;TP53;TWIST1;UCN;WT1;XRCC1;STN1;HMGA2;ARID1A;BCA…	2.47878	7.63718e-14
GOBP_PLACENTA_DEVELOPMENT	ADA;CDKN1B;CEBPA;ADM;PARP1;MAPK14;CSF2;DLX3;EGFR;EPOR;AKT1;ESRRB;FGFR2;HEY1;GATA2;GJB2;ANG;DNMT3L;HIF1A;BIRC2;HSD17B2;CCN1;RBPJ;IL10;ITGB8;LEP;LIF;ARNT;MME;PLG;PPARG;MED1;MAPK1;MAP2K1;HTRA1;PTGS2;PTN;BMP7;SNAI1;SOD1;SOX15;SPP1;STC1;BSG;NR2F2;VDR;STC2;NCOA1	4.50789	7.87038e-14
GOBP_CELL_RECOGNITION	CD226;CCR7;CNR1;CRP;VCAN;MEGF8;EPHA3;EPHB2;CADM1;NCR3;TNFRSF21;LGALS3;MBL2;PAEP;TREM2;ROBO4;CCL19;CCL21;BSG;YWHAZ;ZP3;CXCR4;CASP3;NRP1;CD36	3.63036	8.37901e-14
GOBP_REGULATION_OF_OSTEOBLAST_DIFFERENTIATION	TOB1;CDK6;YAP1;CEBPA;CTHRC1;CTNNB1;DDX5;FGF2;FGFR2;GREM1;GLI1;GLI3;HGF;IGF1;CCN1;IL6;ILK;AREG;LTF;MIR17;MIR20A;MIR200C;MIR21;MIR210;SMAD3;NOTCH1;WNT4;PPARG;RORB;SFRP1;SFRP2;BMP4;BMP7;BMPR1B;SNAI2;SOX9;TNF;TWIST1;VEGFC;ACVR2B;HAND2;RASSF2	4.70566	8.6871e-14
GOBP_CAMERA_TYPE_EYE_MORPHOGENESIS	CTNNB1;EPHB2;ZHX2;FJX1;NECTIN3;GLI3;HIF1A;IHH;AQP1;AQP5;KDR;NOTCH1;NTRK2;PAX2;BAX;NECTIN1;RORB;SLC1A1;BMP4;BMP7;SOX9;STAT3;ZEB1;THY1;TWIST1;VEGFA;BCAR3;PROM1	4.94408	9.0019e-14
GOBP_NEGATIVE_REGULATION_OF_SECRETION	ADA;LILRB1;CNR1;CRH;ADRA2B;ACE;DRD2;EDN1;EGF;F2R;FOXO1;GJA1;ANXA1;APOE;IL1B;IL11;IL12B;INHA;INHBA;LEP;LGALS9;LIF;MIR17;MIR30C1;MIR33A;MAOB;CD200;NOTCH1;OPRM1;OXTR;PSMD9;SFRP1;WNK1;BRAF;TSPO;TNF;TNFRSF1A;TNFRSF1B;TRH;CCR2;UCN;ADIPOQ;CD74	4.13207	9.07264e-14
GOBP_SKELETAL_MUSCLE_ORGAN_DEVELOPMENT	MAPK14;CTNNB1;DDX5;EGR1;FOS;MSTN;ANKRD1;NR4A1;KRAS;NOTCH1;RBFOX1;RB1;BCL2;TCF21;NR2F2;TGFB1;TWIST1;WT1;WNT3A;COPS2;IGSF8;HDAC9;NR1D2	4.13207	9.07264e-14
GOBP_ENDOCRINE_SYSTEM_DEVELOPMENT	CDK6;CREB1;CRH;CRHR1;CYP1B1;DRD2;EDN1;EDNRA;AKT1;FGF2;NR5A1;GATA2;GATA3;GATA6;GHRH;GHRHR;GLI1;NR3C1;GSK3B;ANXA1;FOXA2;RBPJ;IL6;INSR;SMAD2;SMAD3;SMAD4;MDK;PDGFRA;WNT4;MAPK1;MAPK3;MAP2K1;RAF1;BMP4;SOX2;SOX9;SRD5A1;BRAF;TGFBR1;TSPO;THRA;WT1;PAX8;CLOCK;CDH1	4.79309	1.02848e-13
GOBP_ODONTOGENESIS	BCL2L11;FST;CFTR;OSR2;COL1A1;ADM;CSF1;CTNNB1;DLX3;EDN1;FGFR2;GATA6;GLI3;HDAC1;HDAC2;AQP1;AQP5;INHBA;LAMB1;NGFR;TNFRSF11B;SERPINE1;PDGFRA;PPARA;ANKH;HTRA1;BAX;NECTIN1;SDC1;BMP4;BMP7;SRC;BSG;TGFB2;TGFB3;TWIST1;ACVR2B;HAND2	4.79309	1.02848e-13
GOBP_NEGATIVE_REGULATION_OF_ANTIGEN_RECEPTOR_MEDIATED_SIGNALING_PATHWAY	FCRL3;PTPN22;LGALS3;SH2D1A;MIR34A;THY1;EZR	16.261	1.05917e-13
GOBP_GLUCOSE_METABOLIC_PROCESS	PPARGC1A;MAPK14;ENO1;AKT1;FOXO1;SIRT1;NR3C1;HK1;FOXA2;IGF1;IGFBP3;INSR;KCNQ1;LEP;LEPR;MIR210;MST1;PIK3CA;PPARA;SRC;BRS3;TFF3;TNF;TP53;IRS2;ADIPOQ	3.95567	1.12624e-13
GOBP_POSITIVE_REGULATION_OF_COLD_INDUCED_THERMOGENESIS	PPARGC1A;DECR1;DIO2;GATM;GJA1;IGF1R;IL4;IL13;IL18;LEP;LEPR;OXTR;PRLR;STAT6;THRA;CCR2;VEGFA;CXCR4;HDAC3;ADIPOQ;CD36	5.8895	1.15457e-13
GOBP_REGULATION_OF_CD4_POSITIVE_ALPHA_BETA_T_CELL_DIFFERENTIATION	IL27;GATA3;TBX21;ANXA1;HLA-DRB1;HMGB1;IFNG;IL2;IL4;IL12B;IL12RB1;IL18;LGALS9;MIR21;MYB;FOXP3;IL23A;BCL6;CCL19;RUNX1;RUNX3;CD86	9.17293	1.15471e-13
GOBP_REGULATION_OF_TUBE_SIZE	UTS2;CHRM3;ADM;CRP;ADRA1A;ADRA2B;ACE;AGT;AGTR1;AGTR2;EDN1;EDNRA;F2R;F2RL1;FGA;GPER1;APOE;KNG1;LEP;MIR21;MMP2;NOS1;NOS3;OXTR;PTGS2;ACTA2;ROCK1;SLC6A4;SOD1;SOD2;TACR1;TNF;UCN;CALCA;CASR	4.53521	1.24673e-13
GOBP_NEGATIVE_REGULATION_OF_MYELOID_LEUKOCYTE_DIFFERENTIATION	CDK6;LILRB1;CTNNB1;FBN1;GATA2;IAPP;IL4;INHA;INHBA;LTF;LYN;MYC;TNFRSF11B;SFRP1;TLR3;TLR4;ADIPOQ	9.79824	1.25044e-13
GOBP_CHONDROCYTE_DIFFERENTIATION	OSR2;MAPK14;CCN2;CTNNB1;FGF9;GREM1;GLI3;HIF1A;HOXA11;IHH;HES5;SMAD3;MDK;SULF2;RARB;RB1;SFRP2;BMP4;BMPR1B;SNAI2;SOX9;TGFB1;TGFBI;TGFBR1;WNT7A;HMGA2;RUNX1;RUNX3;SERPINH1	5.30314	1.31291e-13
GOBP_REGULATION_OF_MORPHOGENESIS_OF_AN_EPITHELIUM	PHB2;CTNNB1;AGT;AGTR2;EGF;ESR1;FGF1;FGF2;GATA3;GREM1;GDNF;GJA1;FOXP1;HGF;CXCL10;AR;LIF;MIR21;TACSTD2;MDK;PAX2;PDGFA;PIK3CD;WNT4;SFRP1;BMP4;BMP7;SNAI2;SOX9;TNF;VEGFA;PAX8	8.01255	1.37603e-13
GOBP_RETINA_DEVELOPMENT_IN_CAMERA_TYPE_EYE	CYP1B1;ZHX2;FJX1;NECTIN3;HIF1A;IHH;NOTCH1;NTRK2;PAX2;PDGFRA;PDGFRB;SERPINF1;DLL4;MED1;PSEN1;BAX;NECTIN1;RORB;SLC1A1;BMPR1B;SOX9;STAT3;TGFB2;THY1;NRP1;PROM1;ACVR2B	4.32312	1.39285e-13
GOBP_REGULATION_OF_CELL_MATRIX_ADHESION	CDK6;CDKN2A;CIB1;CCR7;CSF1;EPHA3;POLDIP2;GREM1;GSK3B;ITGB3;KDR;MIR29C;SMAD3;MMP12;MMP14;SERPINE1;PIK3CB;PLAU;WNT4;PTEN;RASA1;BCL2;BCL6;ROCK1;CCL21;CCL25;CX3CL1;SDC4;SFRP1;SRC;TEK;THBS1;THY1;UTRN;VEGFA;SKAP1;NRP1;CD36;SEMA3E	4.99276	1.39542e-13
GOBP_MACROPHAGE_CYTOKINE_PRODUCTION	NOD1;LILRB1;SIRT1;HLA-G;AXL;TGFB1;TGFB2;TGFB3;TLR3;TLR4;TWIST1;CD36;CD74	13.8776	1.58489e-13
GOBP_NEGATIVE_REGULATION_OF_T_CELL_MEDIATED_IMMUNITY	LILRB1;AHR;TBX21;HLA-G;IL7R;KLRC1;ARG1;FOXP3;PTPRC	21.133	1.64041e-13
GOBP_BONE_REMODELING	CTHRC1;CSF1R;CSK;CTNNB1;S1PR1;FSHB;GREM1;GJA1;IAPP;IHH;IL6;IL7;ITGB3;LEP;LEPR;MDK;TNFRSF11B;PRKCA;PTN;SFRP1;SPP1;SRC;TGFB1;TGFB3;CALCA;DCSTAMP;RASSF2	6.24462	1.6772e-13
GOBP_CARDIAC_VENTRICLE_DEVELOPMENT	SEMA3C;EDNRA;FGFR2;HEY1;GATA3;HIF1A;HOXA13;CCN1;RBPJ;SMAD4;MDM2;NOS3;NOTCH1;DLL4;MED1;SALL4;SFRP2;BMP4;SLIT3;TGFB1;TGFB2;TGFBR1;PAX8;SLIT2;HAND2	4.93459	1.87363e-13
GOBP_COMPLEMENT_ACTIVATION	PHB2;CD55;CFD;CFI;IL1B;MBL2;TREM2;SERPING1;C1R;C3;C5;C9	4.93459	1.87363e-13
GOBP_PROTEIN_MODIFICATION_BY_SMALL_PROTEIN_CONJUGATION	PDCD6;LRRK2;CTNNB1;EGR1;AKT1;NEDD4L;SIRT1;RNF19A;PTPN22;ANGPT1;MYLIP;HIF1A;BIRC2;BIRC3;IFI27;LIMK1;ARNT;MDM2;NFE2L2;HERC5;PLK1;VPS11;PSEN1;PSMD10;PTEN;BCL2;RELA;ATG3;SKP2;BRCA1;BRCA2;TGFBR1;TSPO;AIMP2;RNF34;AXIN1;HDAC3;SQSTM1;BCL10;MTA1;COPS2;MED17;CDC42	2.06967	2.12858e-13
GOBP_POSITIVE_REGULATION_OF_ALPHA_BETA_T_CELL_DIFFERENTIATION	ADA;GLI3;ANXA1;HLA-DRB1;IFNG;IHH;IL12B;IL12RB1;IL18;LGALS9;MIR21;MYB;FOXP3;IL23A;CCL19;RUNX1;RUNX3;CD86	9.44807	2.17121e-13
GOBP_REGULATION_OF_ANTIGEN_RECEPTOR_MEDIATED_SIGNALING_PATHWAY	ADA;CD226;FCRL3;CCR7;PTPN22;FOXP1;LGALS3;LYN;SH2D1A;MIR34A;PRKCB;PTPRC;RELA;THY1;EZR;CARD11;BCL10;CD19	7.80151	2.19173e-13
GOBP_REGULATION_OF_EXTRINSIC_APOPTOTIC_SIGNALING_PATHWAY	YAP1;CSF2;AGT;AGTR2;AKT1;FGA;GDNF;GPER1;PDIA3;GSK3B;GSTP1;HGF;ICAM1;IGF1;IL1A;IL1B;IL4;IL7;INHBA;AR;ITGAV;LGALS3;NOS3;SERPINE1;PF4;PPP2R1A;PTEN;PTPRC;RAF1;BCL2;RELA;BCL2L1;CX3CL1;SFRP1;SFRP2;BMP4;BMPR1B;SNAI2;SRC;BRCA1;TERT;TGFBR1;THBS1;TIMP3;TNF;RNF34;PEA15;HYAL2;TNFSF10;NRP1;BCL10	4.34363	2.22281e-13
GOBP_REGULATION_OF_LIPID_LOCALIZATION	CETP;CRH;CRHR1;CRP;TTC39B;CYP19A1;AGT;AGTR1;EDN1;EGF;AKT1;SIRT1;ANXA2;APOA2;APOE;IL1A;IL1B;FASLG;IL6;ITGAV;ITGB3;LEP;MIR10B;MIR148A;MIR17;MIR27B;MIR30C1;MIR33A;MIR34A;MIF;NFKB1;NFKBIA;TREM2;PON1;PPARA;PPARG;RETN;REN;RXRA;SPP1;SSTR4;MIR33B;THBS1;TSPO;TNF;C3;IRS2;ADIPOQ;LIPG;CD36;PTGES	3.93473	2.28105e-13
GOBP_T_CELL_DIFFERENTIATION_IN_THYMUS	ADA;RASGRP1;CDK6;CCR7;CTNNB1;ERBB2;GATA3;GBA;GLI3;IHH;IL1A;IL1B;IL7R;FOXP3;WNT4;B2M;PTPRC;BCL2;BMP4;SOD1;BRAF;ADAM17;ZEB1;TP53;FZD7;CARD11;CD74	6.39672	2.37674e-13
GOBP_NEPHRON_EPITHELIUM_DEVELOPMENT	YAP1;CTNNB1;AGT;AGTR2;EDNRA;FGF1;FGF2;GATA3;GREM1;GDNF;GLI3;HOXA11;AQP1;ILK;HES5;LIF;TACSTD2;SMAD4;MYC;NOTCH1;PAX2;WNT4;BCL2;BMP4;SOX9;HNF1B;TCF21;VEGFA;WT1;PAX8;PROM1;ADIPOQ;HS3ST3B1	5.16691	2.44957e-13
GOBP_ACTOMYOSIN_STRUCTURE_ORGANIZATION	MYL9;AKAP13;CCN2;S1PR1;EDN1;MTOR;LMOD1;ANKRD1;TMOD3;ITGB1;RHOC;STMN1;LIMK1;MIR20A;MIR21;TACSTD2;SMAD3;SMAD4;MET;PAK1;PDGFRA;PDGFRB;WNT4;PTGER4;ROCK1;SDC4;SFRP1;SRC;BRAF;TACR1;TGFB3;TGFBR1;ARHGAP28;NRP1;CD47;CDC42	3.73066	2.50326e-13
GOBP_ENDOTHELIUM_DEVELOPMENT	HPSE;CLDN3;CTNNB1;S1PR1;EDNRA;F2RL1;FGF1;PLCB1;HEY1;FOXP1;SLC40A1;HOXA13;ICAM1;RBPJ;IL1B;CXCL10;KDR;MIR200C;MIR21;MIR34A;SMAD4;MET;NOTCH1;NOTCH4;FOXP3;ROBO4;DLL4;ROCK1;BMP4;STC1;ZEB1;BTG1;NR2F2;CLDN5;TNF;TNFRSF1A;VEGFA;EZR;CXCR4;COL18A1;NRP1;CLDN1;S1PR2;ACVR2B	4.51892	2.57721e-13
GOBP_POSITIVE_REGULATION_OF_REACTIVE_OXYGEN_SPECIES_METABOLIC_PROCESS	CDKN1A;MTCO2P12;CLCN3;CRP;MAPK14;CYP1B1;AKR1C1;AGT;AGTR1;F2;F2RL1;FOXO3;FPR2;GSTP1;ITGAM;LEP;NFE2L2;PDGFRB;SOD1;SOD2;TGFB1;THBS1;TSPO;TLR4;TP53;TYROBP;AKR1C3;CD36	7.31185	2.66937e-13
GOBP_PHENOL_CONTAINING_COMPOUND_METABOLIC_PROCESS	CDH3;COMT;DIO2;DRD2;EDNRA;GATA3;HPRT1;ITGAM;MAOA;MAOB;MED1;BCL2;SLC1A1;SRD5A1;SULT1A1;SULT2A1;TGFB2;PAX8;HAND2	5.30198	2.73851e-13
GOBP_STRESS_FIBER_ASSEMBLY	CCN2;S1PR1;MTOR;ITGB1;RHOC;STMN1;LIMK1;MIR20A;MIR21;TACSTD2;SMAD3;MET;PAK1;WNT4;PTGER4;ROCK1;SDC4;SFRP1;SRC;BRAF;TACR1;TGFB3;TGFBR1;ARHGAP28;NRP1;CD47;CDC42	5.30198	2.73851e-13
GOBP_MICROTUBULE_CYTOSKELETON_ORGANIZATION	KIF20A;CDKN1B;CIB1;DCTN6;CFL1;CRMP1;CTNNB1;EPHA3;FKBP4;SIRT1;NUP62;RNF19A;POLDIP2;GJA1;GSK3B;BIRC5;ITGB1;STMN1;MAP2;MECP2;MET;MLH1;PAK1;RMDN1;PLK1;PPP2R1A;ROCK1;BRCA1;BRCA2;EZR;XRCC3;AXIN1;HDAC3;CCNB1;WNT3A;NCOR1;CDK1	2.27005	2.81544e-13
GOBP_CELL_SUBSTRATE_JUNCTION_ORGANIZATION	EPHA3;FN1;POLDIP2;GREM1;ITGA2;ITGA5;ITGB3;KDR;SMAD3;MMP14;WNT4;PTEN;BCL2;ROCK1;SDC4;SFRP1;SRC;TEK;THBS1;THY1;VEGFA;ACTN1;NRP1	5.62136	3.23851e-13
GOBP_T_CELL_CYTOKINE_PRODUCTION	CD55;GATA3;TBX21;IL1B;IL1R1;IL4;IL6;IL18;ARG1;FOXP3;B2M;TNFRSF1B;CCR2;IL18R1	13.061	3.25147e-13
GOBP_REGULATION_OF_FATTY_ACID_METABOLIC_PROCESS	PPARGC1A;CNR1;AKT1;FMO2;SIRT1;ANXA1;IL1B;MIR132;MIR204;MIR30C1;MIR33A;PPARA;PPARG;PTGS2;SOX9;BRCA1;TWIST1;IRS2;ADIPOQ;NCOR1;CD74	5.81294	3.40758e-13
GOBP_NEGATIVE_REGULATION_OF_VIRAL_PROCESS	IFIT1;ISG20;LTF;MIR141;MIR30C1;MBL2;CCL5;SLPI;TNF;ZFP36;HMGA2	6.02914	3.49196e-13
GOBP_POSITIVE_REGULATION_OF_NEURON_DEATH	BCL2L11;PARP1;CTNNB1;EGR1;DKK1;FOXO3;FOS;NR3C1;GSK3B;IFNG;FASLG;ITGAM;MIR200A;ATM;MAP2K7;BAX;TGFB2;TLR4;TNF;TP53;TYROBP;AIMP2;CASP3	6.02914	3.49196e-13
GOBP_REGULATION_OF_CELLULAR_RESPONSE_TO_TRANSFORMING_GROWTH_FACTOR_BETA_STIMULUS	FBN1;SIRT1;HDAC1;HDAC2;IL4;LOX;MIR21;SMAD2;SMAD3;SMAD4;MIR342;PPARA;PPARG;HTRA1;ADAM17;ZEB1;TGFB1;TGFB1I1;TGFB3;THBS1;TP53;TET1;AXIN1	4.36532	3.54473e-13
GOBP_PHOSPHOLIPID_METABOLIC_PROCESS	CETP;SMPDL3A;PHB2;CSF1R;FGF2;PLCB1;ALOX15;GATA6;GPX4;APOA2;IMPA2;LIPC;MIR30C1;MECP2;ATM;PDGFA;PDGFRB;PIK3CA;PIK3CB;PIK3CD;PIK3CG;PLA2G2A;PON1;PTEN;BECN1;LIPG	2.752	3.64694e-13
GOBP_POSITIVE_REGULATION_OF_NEURON_PROJECTION_DEVELOPMENT	CNR1;AGT;EPHA3;EPHB2;EPO;EZH2;HGF;APOE;IGF1R;LYN;MIR200C;MDK;NFE2L2;NTRK2;NTRK3;SERPINF1;PTN;BDNF;CX3CL1;BMP7;BRAF;VEGFA;NDNF;NRP1	4.26591	3.67679e-13
GOBP_FATTY_ACID_BIOSYNTHETIC_PROCESS	CYP1A1;CYP1A2;CYP3A4;EDN1;SIRT1;ALOX15;HPGDS;GPX4;GSTM1;GSTM2;GSTP1;ANXA1;ACACA;IL1B;LIPC;MIR132;MIR204;MIR30C1;MIR33A;MIF;PTGS2;BRCA1;XBP1;AKR1C3;LIPG;TECR;PTGES;CD74	4.17502	3.75338e-13
GOBP_IMMUNOGLOBULIN_PRODUCTION	PHB2;FCRL3;EPHB2;ERCC1;MSH6;TBX21;HLA-DPB1;HLA-DQB1;HLA-DRB1;HSPD1;IL2;IL4;IL6;IL10;IL13;MLH1;MSH2;FOXP3;B2M;PTPRC;IL21;BCL6;STAT6;TCF3;BTK;TGFB1;TNF;XBP1;XRCC4;IL33;CD86;CD40LG	3.56541	4.04627e-13
GOBP_T_CELL_CHEMOTAXIS	CXCL13;CXCL10;PIK3CD;PIK3CG;CXCL16;CCL5;CCL21;WNK1;ADAM17;CCR2	19.0258	4.21787e-13
GOBP_POSITIVE_REGULATION_OF_PROTEIN_SECRETION	DNM1L;CFTR;UCN3;F2RL1;FGA;ANKRD1;ANG;GPER1;HIF1A;HLA-DRB1;IGF1;IL1A;IL13;TREM2;PPARG;PSMD9;TGFB1;TGFB2;TGFB3;TLR2;TLR4;TRH;VEGFC;EZR;NR0B2;CASR;IRS2	4.76793	4.43845e-13
GOBP_EOSINOPHIL_MIGRATION	DAPK2;IL4;LGALS3;PTGER4;CCL1;CCL2;CCL5;CCL11;CCL21;CX3CL1	28.1558	4.52726e-13
GOBP_NEGATIVE_REGULATION_OF_T_CELL_RECEPTOR_SIGNALING_PATHWAY	PTPN22;LGALS3;SH2D1A;THY1;EZR	22.4483	4.77882e-13
GOBP_REGULATION_OF_EPITHELIAL_CELL_DIFFERENTIATION	CDKN1B;YAP1;FST;CTNNB1;EZH2;FGF2;PLCB1;GATA3;GDNF;IFNG;IL1A;IL1B;IL13;KRAS;HES5;LIF;MIR200C;MIR21;MIR34A;MMP9;NOTCH1;NOTCH4;SERPINE1;PAX2;ERRFI1;MED1;PRLR;CCND1;ROCK1;BMP4;BMP7;SOX9;ZEB1;BTG1;CLDN5;TNF;TNFRSF1A;VDR;VEGFA;ZFP36;PAX8;PROM1;S1PR2;GDF3	4.13957	4.77988e-13
GOBP_POSITIVE_REGULATION_OF_ENDOCYTOSIS	LRRK2;DRD2;EGF;F2RL1;NEDD4L;GATA2;GREM1;GH1;ANGPT1;ANXA2;APOE;IL4;INSR;ITGA2;NTF3;SERPINE1;TREM2;PPT1;AXL;B2M;CCL19;CCL21;SELE;C3;VEGFA;VTN;WNT3A;CD14;CD36;CDC42	5.71927	4.8096e-13
GOBP_POSITIVE_REGULATION_OF_APOPTOTIC_SIGNALING_PATHWAY	BCL2L11;DNM1L;AGT;AGTR2;SIRT1;GPER1;PDIA3;FAS;INHBA;MIR210;MIR27B;MYC;NGFR;PPP2R1A;PTEN;PTPRC;BAX;SFRP1;BMPR1B;SOD1;TGFBR1;THBS1;TIMP3;TNF;TP53;BECN1;PEA15;HYAL2;TNFSF10;BCL10	4.62788	4.9193e-13
GOBP_POSITIVE_REGULATION_OF_MYELOID_LEUKOCYTE_CYTOKINE_PRODUCTION_INVOLVED_IN_IMMUNE_RESPONSE	NOD1;LILRB1;SIRT1;HLA-G;MIF;TLR3;TLR4;BCL10;CD36;CD74	14.0945	5.05739e-13
GOBP_CELLULAR_RESPONSE_TO_FATTY_ACID	CDK4;AKR1C1;AKR1C2;EDN1;PLCB1;SRC;AKR1C3;CLDN1	14.0945	5.05739e-13
GOBP_POSITIVE_REGULATION_OF_CYTOSKELETON_ORGANIZATION	CDKN1B;CCR7;CSF3;CCN2;EDN1;F2RL1;NUP62;ALOX15;MTOR;LMOD1;HCK;RHOC;LIMK1;SMAD3;MECP2;MET;NTF3;NTRK3;PAK1;WNT4;CCL11;CCL21;CX3CL1;SDC4;SFRP1;BRAF;TACR1;TEK;TGFB3;TGFBR1;NRP1;CD47;CDC42	3.76298	5.29906e-13
GOBP_RHO_PROTEIN_SIGNAL_TRANSDUCTION	CFL1;AKAP13;ADRA1A;AGTR1;F2R;F2RL1;APOE;ITGB1;RHOG;STMN1;LIMK1;MET;NGFR;PDGFRB;RAF1;BCL6;ROCK1;NRP1;CDC42	4.50202	5.32626e-13
GOBP_REGULATION_OF_ACTIN_FILAMENT_BUNDLE_ASSEMBLY	CCN2;S1PR1;MTOR;RHOC;STMN1;LIMK1;MIR20A;MIR21;TACSTD2;SMAD3;MET;PAK1;WNT4;PTGER4;ROCK1;CX3CL1;SDC4;SFRP1;BRAF;TACR1;TGFB3;TGFBR1;ARHGAP28;NRP1;CD47;CDC42	5.30083	5.71313e-13
GOBP_RESPONSE_TO_RETINOIC_ACID	YAP1;PHB2;COL1A1;CREB1;CYP26A1;EPHA3;FGFR2;DKK1;GATA6;GJB2;GSK3B;HDAC2;HSD17B2;IGFBP7;AQP1;LEP;LYN;MMP2;ATM;NTRK3;PAX2;PDGFA;PDGFRB;SERPINF1;RORB;RXRA;SLC6A4;SOX9;TNF;FZD7;WNT3A;HAND2	5.30083	5.71313e-13
GOBP_REGULATION_OF_CELL_SHAPE	PLXNC1;CRK;CSF1R;F2;PLXND1;FN1;ANXA1;HCK;KDR;RHOC;RHOG;MIR21;RHOF;FGD6;RASA1;CCL2;CCL11;VEGFA;EZR;SEMA3E	4.28507	5.88009e-13
GOBP_PROTEIN_COMPLEX_OLIGOMERIZATION	DNM1L;CTH;ELAVL1;ACACA;HLA-DRB1;HLA-G;HPRT1;AQP2;AQP5;MAT2A;MIF;NINJ1;P2RX3;B2M;SOD2;SYT1;TP53;C9;TRPV1;CARD11;BCL10;CLDN1;MS4A1;CD74	3.33804	5.90984e-13
GOBP_POSITIVE_REGULATION_OF_EPITHELIAL_CELL_MIGRATION	PDCD6;CIB1;MAPK14;AGT;HBEGF;EDN1;EGF;AKT1;ETS1;FGF1;FGF2;SIRT1;CAPN7;MTOR;GATA2;GATA3;FOXP1;ANGPT1;ANXA1;HIF1A;HMGB1;IFNG;ITGA2;ITGB3;JUN;KDR;MIR10B;MIR126;MIR132;MIR143;MIR200A;MIR21;MIR210;MIR27B;MIR30A;MIR31;MET;MMP9;MIR135B;MIR342;NFE2L2;NOS3;PIK3CB;PIK3CD;PIK3CG;PRKCA;PTGS2;SMOC2;BMP4;SOX9;SRC;ADAM17;TACR1;TDGF1;TEK;TGFB1;TGFB2;THBS1;VEGFA;VEGFC;WNT7A;IRS2;NRP1;HDAC9	3.95148	5.94096e-13
GOBP_NEGATIVE_REGULATION_OF_EPITHELIAL_CELL_PROLIFERATION	CDK6;CDKN1B;PHB2;CPB2;DRD2;FGFR2;FLT1;GATA3;INTU;APOE;IL12B;AR;MIR126;MIR132;MIR181C;MIR21;MIR22;MIR29C;MIR34A;MIR342;NGFR;NOTCH1;SERPINF1;DLL4;PPARG;MED1;PRL;B2M;PTEN;MIR503;RB1;MIR483;CCL2;SFRP1;SFRP2;BMP4;SNAI2;SOX2;SOX9;BRCA2;KLF9;ZEB1;NR2F2;TGFB1;TGFB2;TGFBR1;THBS1;TNF;VDR;RUNX3	3.95148	5.94096e-13
GOBP_REGULATION_OF_NIK_NF_KAPPAB_SIGNALING	NOD1;PHB2;EDN1;EGFR;PTPN22;GREM1;PDCD4;BIRC2;IL1B;IL12B;IL18;ILK;LGALS9;MIR132;MIR204;MIR21;MIR27B;MIR30C2;NR3C2;NFKBIA;IL23A;TREM2;RELA;CCL19;BMP7;TLR2;TLR3;TLR4;TNF;EZR;ACTN4;IL18R1;CD14;CD86;RASSF2	5.09504	6.93194e-13
GOBP_LUNG_MORPHOGENESIS	YAP1;CTNNB1;FGFR2;KRAS;LIF;MAPK1;MAPK3;MAP2K1;BMP4;SOX9;TCF21;TNF;CDC42	9.4038	6.99184e-13
GOBP_NEGATIVE_REGULATION_OF_MYELOID_CELL_DIFFERENTIATION	CDK6;CIB1;LILRB1;H4-16;CTNNB1;FBN1;GABPA;GATA2;IAPP;IL4;INHA;INHBA;LTF;LYN;MYB;MYC;NFKBIA;TNFRSF11B;KLF13;PF4;H4C15;SFRP1;TLR3;TLR4;ZFP36;H4C9;H4C1;H4C4;H4C6;H4C12;H4C11;H4C3;H4C8;H4C2;H4C5;H4C13;H4C14;ADIPOQ	5.82861	7.09336e-13
GOBP_REGULATION_OF_T_HELPER_CELL_DIFFERENTIATION	IL27;GATA3;TBX21;ANXA1;HLA-DRB1;IL2;IL4;IL12B;IL12RB1;IL18;MIR21;MYB;FOXP3;IL23A;BCL6;CCL19;CD86	11.0788	7.25697e-13
GOBP_ACTIVATION_OF_PROTEIN_KINASE_ACTIVITY	PHB2;ADRA2B;DRD2;AGT;HBEGF;EGF;EGFR;EPO;FGF1;MTOR;GREM1;GH1;ANG;ANGPT1;IGF1;IL4;IL12B;IL18;INSR;ITGB3;AREG;LEP;MIR143;MIR21;MAS1;NTF3;NTRK3;IL23A;PIK3CA;MAP2K1;PRLR;CCL5;SLC1A1;WNK1;SRC;TGFB2;TLR3;TXN;UCN;VEGFA;CALCA;AXIN1;ACVR2B;CD86	4.34643	7.29578e-13
GOBP_TUMOR_NECROSIS_FACTOR_MEDIATED_SIGNALING_PATHWAY	CHUK;F2RL1;FOXO3;GSTP1;BIRC2;BIRC3;FAS;ILK;MIR27B;MIR34A;NFKBIA;RELA;ADAM17;TNF;TNFRSF1A;TNFRSF1B;TP53;ACTN4;ADIPOQ	5.22809	7.81934e-13
GOBP_DEVELOPMENT_OF_PRIMARY_FEMALE_SEXUAL_CHARACTERISTICS	FST;ZFP42;CYP19A1;ESR1;FOXO3;SIRT1;FSHB;FSHR;NR5A1;AMH;AMHR2;GNRH1;ANG;INHA;INHBA;INSR;KDR;LEP;LHCGR;SMAD4;KITLG;MMP2;MMP14;ATM;NOS3;PDGFRA;PGR;WNT4;RETN;BAX;BCL2;BCL2L1;SFRP1;BMPR1B;SLIT3;SOD1;SRC;BRCA2;NR2F2;VEGFA;WT1;ZP3;CASP3;SLIT2	5.22809	7.81934e-13
GOBP_GLYCOPROTEIN_BIOSYNTHETIC_PROCESS	UST;GALNT6;CCR7;CTNNB1;HBEGF;TET3;EXTL3;PLCB1;GALNT3;IGF1;IL15;MIR17;MIR20A;MIR31;ST6GALNAC1;PSEN1;BCL2;CCL19;CCL21;GORASP1;BMPR1B;TET1;MAGT1;IL33;CHST3;HS3ST3B1	2.93494	8.15614e-13
GOBP_REGULATION_OF_PEPTIDYL_SERINE_PHOSPHORYLATION	CSF3;EGFR;AKT1;DKK1;ANGPT1;HGF;IFNA1;IFNA13;IFNG;IL6;IL11;LIF;MIR132;MIF;NGF;NOS1;NTF3;NTF4;NTRK2;NTRK3;PAK1;PIK3CA;PTEN;PTGS2;BAX;RAF1;BCL2;BDNF;SFRP2;BRAF;TGFB1;TNF;TXN;UCN;VEGFA;AXIN1;BCAR3;WNT3A;CD44;RASSF2	4.4127	8.99295e-13
GOBP_TRANSITION_METAL_ION_HOMEOSTASIS	ABCB6;CCDC22;SLC40A1;HIF1A;IFNG;LTF;MIR210;SMAD4;MYC;B2M;SLC1A1;SOD1;SOD2;HYAL2	4.4127	8.99295e-13
GOBP_REGULATION_OF_CELL_JUNCTION_ASSEMBLY	PDLIM5;CLDN3;GPBAR1;ACE;AGT;EPHA3;EPHB2;DKK1;POLDIP2;GREM1;IL1B;IL1RAP;IL17A;KDR;MIR142;SMAD3;MMP14;NTRK2;NTRK3;OXTR;WNT4;PTEN;PTPRD;NECTIN1;ROCK1;BDNF;SDC4;SFRP1;SNAI2;SNAI1;SRC;TEK;THBS1;THY1;TLR2;CLDN5;TNF;VEGFA;WNT7A;NRP1;WNT3A;CLDN1	3.63522	9.35985e-13
GOBP_IMMUNOGLOBULIN_PRODUCTION_INVOLVED_IN_IMMUNOGLOBULIN_MEDIATED_IMMUNE_RESPONSE	ERCC1;MSH6;TBX21;HLA-DPB1;HLA-DQB1;HLA-DRB1;HSPD1;IL2;IL4;IL10;MLH1;MSH2;FOXP3;B2M;PTPRC;BCL6;STAT6;BTK;TGFB1;CD40LG	6.82252	9.40339e-13
GOBP_CELLULAR_RESPONSE_TO_STARVATION	CDKN1A;LRRK2;COMT;ALB;FOXO1;FOXO3;SIRT1;FOS;MTOR;GBA;IGF1R;FAS;NFE2L2;WNT4;KRT20;PPARA;MAPK1;MAPK3;MAPK8;BCL2;SFRP1;SLC2A1;SRD5A1;KLF10;TP53;XBP1;MAP1LC3B;AKR1C3;BECN1	3.9605	9.58578e-13
GOBP_ANTIGEN_PROCESSING_AND_PRESENTATION_OF_PEPTIDE_OR_POLYSACCHARIDE_ANTIGEN_VIA_MHC_CLASS_II	HLA-DPB1;HLA-DQB1;HLA-DRB1;TREM2;B2M;THBS1;CD74	13.2133	1.04457e-12
GOBP_REGULATION_OF_CARBOHYDRATE_METABOLIC_PROCESS	PPARGC1A;EGF;AKT1;FOXO1;SIRT1;MTOR;GPER1;NR3C1;GSK3B;HIF1A;FOXA2;IFNG;IGF1;IGFBP3;INSR;LEP;LEPR;LHCGR;ARNT;MIR195;MIR210;MAS1;MST1;NFKB1;P2RY6;ENPP1;PPARA;PSEN1;SRC;STAT3;TFF3;TGFB1;TP53;IRS2;ADIPOQ;NCOR1	3.79872	1.1182e-12
GOBP_MITOTIC_CELL_CYCLE_PHASE_TRANSITION	CDK4;CDK6;CDKN1A;CDKN1B;CDKN2A;CDKN3;KHDRBS1;PHB2;CKS1B;CYP1A1;DUSP1;EGFR;EIF4EBP1;AIF1;ERCC2;AKT1;ESRRB;EZH2;FOXM1;PLCB1;TMOD3;ANXA1;APEX1;BIRC5;ID2;INHBA;ITGB1;MIR195;MIR214;MIR29C;MIR30C2;MDM2;MECP2;MNAT1;MUC1;MYC;ATM;PLK1;POLE;PTEN;MIR451A;RB1;CCND1;BCL2;ACTB;CCL2;SKP2;SMARCC1;BRCA1;ADAM17;TERT;TFDP1;TP53;XRCC3;ARID1A;KLF11;CCNB1;CCNE1;ACVR1B;CCNE2;CDK1;CDC6	2.50809	1.15614e-12
GOBP_NEGATIVE_REGULATION_OF_MAPK_CASCADE	SIRPA;CSK;AGT;DUSP1;DUSP2;DUSP6;EPHB2;F2RL1;FBLN1;FOXM1;FOXO1;NUP62;PTPN22;GBA;PDCD4;GPER1;GSTP1;APOE;IGF1R;IL1B;LIF;LYN;MIR20A;MIR200C;MIR21;SMAD4;MYC;PIK3CB;ERRFI1;TREM2;PPARG;PPP2R1A;PSMD10;PTEN;MIR503;SEMA6A;PTPRC;SFRP1;SFRP2;BMP4;BMP7;TIMP3;TLR4;UCHL1;EZR;HYAL2;HDAC3;ADIPOQ;NCOR1	3.86151	1.1659e-12
GOBP_REGULATION_OF_ANTIGEN_PROCESSING_AND_PRESENTATION	LILRB2;NOD1;CCR7;TREM2;CCL19;CCL21;THBS1;CD68;CD74	31.6733	1.18586e-12
GOBP_CELLULAR_DEFENSE_RESPONSE	LILRB2;CCR9;CCR5;CX3CR1;HLA-G;CXCR2;ITGB1;KIR2DL4;KIR3DL2;SH2D1A;CXCL9;RELA;CCR2;TYROBP;BECN1;BCL10;IL33	9.06774	1.1913e-12
GOBP_MACROPHAGE_CHEMOTAXIS	CSF1;CSF1R;IL34;CYP19A1;MSTN;LGALS3;MDK;MIF;MMP2;MAPK1;MAPK3;RARRES2;CCL2;CCL5;THBS1;C5	11.6859	1.24937e-12
GOBP_POSITIVE_REGULATION_OF_INTERLEUKIN_4_PRODUCTION	GATA3;IL1RAP;LGALS9;FOXP3;ZP3;IL33;CD86;CD40LG	19.9568	1.26807e-12
GOBP_ENDOTHELIAL_CELL_DEVELOPMENT	HPSE;CLDN3;EDNRA;F2RL1;PLCB1;HOXA13;ICAM1;IL1B;MET;NOTCH4;FOXP3;ROBO4;ROCK1;STC1;CLDN5;TNF;TNFRSF1A;VEGFA;EZR;COL18A1;CLDN1;S1PR2	7.05859	1.26998e-12
GOBP_REGULATION_OF_PROTEIN_STABILITY	KHDRBS1;PPARGC1A;PHB2;LRRK2;CREB1;NEDD4L;SIRT1;MYLIP;HSPD1;APOA2;IGF1;KRAS;SMAD3;MDM2;PLK1;QRSL1;VPS11;MAPK1;PTEN;BCL2;SRC;TERT;TP53;TYROBP;BAG6;NAA16;CASP3;HDAC3;RASSF2	2.90051	1.29435e-12
GOBP_POSITIVE_REGULATION_OF_PROTEIN_CONTAINING_COMPLEX_ASSEMBLY	BCL2L11;CDKN1B;CXCL13;CCR7;CSF2;CSF3;ESR1;ALOX15;MTOR;LMOD1;GSK3B;HCK;IFNG;RHOC;LGALS3;MECP2;MET;MMP1;MMP3;ATM;PAK1;BAX;CCL11;CCL21;FSCN1;SRC;TERF1;TGFB1;TLR4;TNF;TP53;VEGFA;SKAP1;CD36	3.71416	1.31394e-12
GOBP_NEGATIVE_REGULATION_OF_INTERFERON_GAMMA_PRODUCTION	LILRB1;GATA3;CD274;HLA-DRB1;HMGB1;IL10;INHA;INHBA;LGALS9;FOXP3;AXL;TLR4;IL33	10.5749	1.33193e-12
GOBP_REGULATION_OF_MACROPHAGE_MIGRATION	CD200R1;CSF1;CSF1R;IL34;CX3CR1;CYP19A1;MSTN;MDK;MIF;MMP14;CD200;TREM2;MAPK1;MAPK3;RARRES2;CCL5;CX3CL1;THBS1;C5	10.5749	1.33193e-12
GOBP_REGULATION_OF_MYELOID_LEUKOCYTE_MEDIATED_IMMUNITY	CX3CR1;F2RL1;GATA2;IL4;IL13;ITGAM;ARG1;LGALS9;LYN;BTK;C3;CCR2;TYROBP	7.86158	1.37392e-12
GOBP_REGULATION_OF_PHOSPHATIDYLINOSITOL_3_KINASE_SIGNALING	RASGRP1;CSF3;DCN;AGT;EGF;EGFR;F2;F2R;F2RL1;FGF2;FLT1;FN1;SIRT1;FSHR;GH1;ANGPT1;GPER1;HGF;IGF1;IGF1R;IL18;INSR;KDR;LEP;MIR126;MIR20A;MIR21;NTRK2;NTRK3;PDGFA;PDGFRA;PDGFRB;TREM2;MYDGF;PTEN;CCL5;SOX9;SRC;TEK;TGFB2;TNF;TWIST1;CAT;BECN1;SEMA3E	5.08843	1.44539e-12
GOBP_MIRNA_METABOLIC_PROCESS	DDX5;EGR1;ETS1;FGF2;FOXO3;DICER1;FOS;GATA2;GATA3;GATA6;NR3C1;HIF1A;IL10;JUN;SMAD3;SMAD4;MYB;MYC;NFKB1;NGFR;POU5F1;PPARA;PPARG;PRL;RELA;BMP4;SOX9;STAT3;TERT;TGFB1;TGFB2;TNF;TP53;WT1	5.84542	1.47671e-12
GOBP_REGULATION_OF_REGULATED_SECRETORY_PATHWAY	LRRK2;CNR1;ADRA1A;DRD2;F2RL1;GATA2;GSK3B;IL4;IL13;ITGAM;LGALS9;LYN;NOTCH1;PRKCB;BRAF;SYP;SYT1;CCR2;WNT7A;ZP3	4.32686	1.501e-12
GOBP_CYCLIC_NUCLEOTIDE_MEDIATED_SIGNALING	ADM;CREB1;AHR;GHRHR;APOE;AQP1;SOX9;THBS1;UCN;CD36	6.0806	1.50542e-12
GOBP_MICROTUBULE_ORGANIZING_CENTER_ORGANIZATION	CTNNB1;SIRT1;NUP62;PLK1;BRCA1;BRCA2;XRCC3;CDK1	4.22547	1.54684e-12
GOBP_DIGESTIVE_SYSTEM_PROCESS	CHRM3;AKR1C1;APOA2;AQP1;IL17A;AQP5;KCNQ1;LEP;MDK;MUC2;MUC4;OXTR;WNK1;SOX9;TACR1;TFF3;TLR4;UCN;VDR;EZR;TRPV1;CD36	5.2249	1.63152e-12
GOBP_POSITIVE_REGULATION_OF_CELL_KILLING	KLRC4-KLRK1;RASGRP1;CD226;F2RL1;KLRK1;CADM1;NCR3;HLA-B;HLA-DRB1;HLA-G;IFNG;IL12B;IL12RB1;ITGAM;ARG1;SH2D1A;NOS2;IL23A;MAPK8;B2M;PTPRC;PVR;IL21;TYROBP;VAV1	7.32787	1.68048e-12
GOBP_REGULATION_OF_CALCIUM_ION_TRANSMEMBRANE_TRANSPORT	CRHR1;DRD2;EPO;F2;F2R;GPER1;REM1;GSTM2;IL13;CXCL10;ITGB3;LHCGR;LYN;MIR200C;MIR21;CXCL9;NOS1;P2RX3;P2RX5;P2RY6;PIK3CG;BAX;BCL2;CX3CL1;THY1;CD19;MS4A1	3.74395	1.72046e-12
GOBP_CALCIUM_ION_TRANSMEMBRANE_IMPORT_INTO_CYTOSOL	CCR5;CCR7;ADRA1A;CCN2;DRD2;EPO;F2;F2R;FGF2;GPER1;GSTM2;FASLG;IL13;CXCL10;ITGB3;LHCGR;LYN;MIR200C;CXCL9;NOS1;P2RX3;P2RX5;P2RY6;PTPRC;BAX;BCL2;CCL19;CCL21;CX3CL1;THY1;TRPV1;CD19;MS4A1	3.80376	1.80924e-12
GOBP_POSITIVE_REGULATION_OF_SUPRAMOLECULAR_FIBER_ORGANIZATION	CDKN1B;CCR7;CSF3;CCN2;EDN1;F2RL1;ALOX15;MTOR;LMOD1;HCK;APOE;RHOC;LIMK1;SMAD3;MECP2;MET;PAK1;WNT4;PSEN1;RB1;CCL11;CCL21;CX3CL1;SDC4;SFRP1;BRAF;TACR1;TGFB3;TGFBR1;NRP1;CD47;CDC42	3.86823	1.88458e-12
GOBP_NEGATIVE_REGULATION_OF_TRANSMEMBRANE_RECEPTOR_PROTEIN_SERINE_THREONINE_KINASE_SIGNALING_PATHWAY	TOB1;FST;FBN1;DKK1;SIRT1;GREM1;HDAC1;HDAC2;MIR17;MIR20A;MIR342;NOTCH1;PPARA;PPARG;HTRA1;SFRP1;SFRP2;ADAM17;TGFB1I1;TGFB3;TP53;TET1;GDF3	4.09677	1.99216e-12
GOBP_POSITIVE_REGULATION_OF_FIBROBLAST_PROLIFERATION	CDK4;CDK6;CDKN1A;AGT;EGFR;ESR1;FN1;IGF1;AQP1;IL13;ITGB3;JUN;LIF;MIR17;MIF;MYC;NGFR;PDGFA;PDGFRA;PDGFRB;S100A6;CCNB1;CD74;CDC6	8.75485	1.99753e-12
GOBP_STRIATED_MUSCLE_CELL_DIFFERENTIATION	MYL9;PDLIM5;AKAP13;MAPK14;ADRA1A;AGT;EDN1;AKT1;EZH2;DKK1;MTOR;LMOD1;GATA6;GREM1;ANKRD1;FOXP1;TMOD3;HDAC1;ERVW-1;IGF1;RBPJ;IL4;CXCL10;ITGB1;KRAS;MIR195;MIR200B;MIR204;SMAD4;CXCL9;MMP14;NOS1;NOTCH1;YBX1;PDGFRA;PDGFRB;PPARA;RARB;RB1;BCL2;RGS4;BDNF;SDC1;BMP4;TGFB1;VEGFA;WT1;XBP1;FZD7;CASP3;HDAC3;WNT3A;SCGB3A1;HDAC9;CDK1	3.00784	2.08188e-12
GOBP_NEGATIVE_REGULATION_OF_LYMPHOCYTE_APOPTOTIC_PROCESS	ADA;KIFAP3;FOXP1;HIF1A;IL2;IL7R;IDO1;MIF;PDCD1;BCL2;BCL6;CCL5;BMP4;IRS2;BCL10;CD74	12.4359	2.08701e-12
GOBP_POSITIVE_REGULATION_OF_PROTEIN_CATABOLIC_PROCESS	CDKN1B;CEBPA;LRRK2;AKT1;FOXO1;RNF19A;GBA;MYLIP;GSK3B;IFNG;APOE;IL1B;MDM2;NFE2L2;PLK1;TREM2;VPS11;PSEN1;PSMD10;SOX9;STX5;TNF;TNFRSF1B;EZR;VIP;BAG6;AXIN1;IL33	3.54166	2.10466e-12
GOBP_ACTIVATION_OF_CYSTEINE_TYPE_ENDOPEPTIDASE_ACTIVITY_INVOLVED_IN_APOPTOTIC_PROCESS	PDCD6;NOD1;F2R;F3;HSPD1;FASLG;SMAD3;NGFR;PPARG;BAX;SLC1A1;TNF	6.22928	2.16131e-12
GOBP_REGULATION_OF_MIRNA_TRANSCRIPTION	DDX5;EGR1;ETS1;FGF2;FOXO3;FOS;GATA2;GATA3;GATA6;NR3C1;HIF1A;IL10;JUN;SMAD3;SMAD4;MYB;MYC;NGFR;POU5F1;PPARA;PPARG;PRL;RELA;BMP4;SOX9;STAT3;TERT;TGFB1;TGFB2;TNF;TP53;WT1	7.64302	2.17046e-12
GOBP_INSULIN_SECRETION	CFTR;UCN3;CNR1;DRD2;FOXO1;GPER1;ANXA1;HIF1A;HLA-DRB1;FOXA2;IFNG;IL1B;IL1RN;IL6;LEP;SMAD2;NOS2;PSMD9;RAF1;CCL5;SFRP1;HNF1B;TNF;TRH;NR0B2;CASR;IRS2;ACVR2B;CLOCK	3.77553	2.24717e-12
GOBP_PROSTANOID_METABOLIC_PROCESS	AKR1C1;AKR1C2;EDN1;AKR1B1;SIRT1;HPGDS;GSTM1;GSTP1;ANXA1;HPGD;IL1B;MIR132;MIR204;MIF;PTGS2;TNFRSF1A;AKR1C3;PTGES;CD74	9.35633	2.25227e-12
GOBP_ANTIGEN_PROCESSING_AND_PRESENTATION_OF_EXOGENOUS_PEPTIDE_ANTIGEN_VIA_MHC_CLASS_II	HLA-DPB1;HLA-DQB1;HLA-DRB1;B2M;CD74	15.8475	2.34441e-12
GOBP_REGULATION_OF_SYNAPSE_STRUCTURE_OR_ACTIVITY	LILRB2;PDLIM5;CFL1;LRRK2;MAPK14;DRD2;EPHB2;DKK1;APOE;IL1RAP;IL10;NTRK2;NTRK3;OXTR;TREM2;PPT1;PTEN;PTPRD;NECTIN1;BDNF;TLR2;TNF;WNT7A;YWHAZ;WNT3A	3.47648	2.34485e-12
GOBP_REGULATION_OF_NEUROINFLAMMATORY_RESPONSE	LRRK2;CD200R1;IGF1;IL1B;IL4;IL6;IL18;MIR142;MIR181C;MIR195;MMP3;MMP9;CD200;ATM;TREM2;PTGS2;PTPRC;CX3CL1;TNF;TNFRSF1B;IL33	11.1013	2.35077e-12
GOBP_ORGANELLE_LOCALIZATION	CDH3;PDCD6;DNM1L;RASGRP1;CFL1;CFTR;LRRK2;CTNNB1;ALB;KIFAP3;NUP62;MTOR;GATA2;GJA1;HIF1A;BIRC5;IFNG;IL4;IL13;ITGB1;LGALS9;LMNB1;LYN;MAP2;MLH1;ATM;RMDN1;PIK3CD;PIK3CG;PLK1;SYBU;VPS11;PSEN1;PTEN;SDC1;SDC4;SLC2A4;STX5;SYT1;BTK;TERF1;UCHL1;EZR;YWHAZ;ACTN4;BECN1;CCNB1;CDC42	2.31375	2.61851e-12
GOBP_POSITIVE_REGULATION_OF_LIPID_LOCALIZATION	CETP;CRH;CYP19A1;EDN1;SIRT1;ANXA2;APOE;IL1A;IL1B;FASLG;MIR10B;MIR34A;MIF;NFKB1;NFKBIA;TREM2;PON1;PPARG;RETN;RXRA;SPP1;SSTR4;C3;ADIPOQ;LIPG;CD36;PTGES	4.95603	2.62653e-12
GOBP_GLYCEROPHOSPHOLIPID_METABOLIC_PROCESS	CETP;PHB2;CSF1R;FGF2;PLCB1;ALOX15;APOA2;IMPA2;LIPC;MECP2;ATM;PDGFA;PDGFRB;PIK3CA;PIK3CB;PIK3CD;PIK3CG;PLA2G2A;PON1;PTEN;BECN1	2.92268	2.85949e-12
GOBP_CELLULAR_CARBOHYDRATE_METABOLIC_PROCESS	PPARGC1A;AKT1;FOXO1;SIRT1;MTOR;GPER1;NR3C1;GSK3B;HAS1;HK1;FOXA2;IGF1;IGFBP3;IMPA2;INSR;LEP;LEPR;LHCGR;MIR195;MIR210;MAS1;MECP2;MST1;P2RY6;ENPP1;PPARA;PTEN;SRC;BRAF;STAT3;TFF3;TP53;IRS2;ADIPOQ;NCOR1	2.98182	2.86556e-12
GOBP_RESPONSE_TO_BMP	TOB1;FST;DDX5;DLX3;DLX5;MEGF8;EGR1;FBN1;DKK1;GATA3;GATA6;GREM1;PDCD4;HOXA13;CCN1;RBPJ;ILK;KDR;HES5;MIR17;MIR20A;MIR21;SMAD2;SMAD3;SMAD4;NOTCH1;PPARG;MAPK3;HTRA1;SFRP1;SFRP2;BMP4;BMP7;BMPR1B;SOX9;TGFB1;TGFB2;TGFB3;LEFTY2;ACVR2B;GDF3	3.80907	2.92728e-12
GOBP_EOSINOPHIL_CHEMOTAXIS	DAPK2;IL4;LGALS3;CCL1;CCL2;CCL5;CCL11;CCL21;CX3CL1	36.9458	2.94831e-12
GOBP_REGULATION_OF_PROTEIN_LOCALIZATION_TO_MEMBRANE	CIB1;AGR2;CSK;EGFR;EPHA3;EPHB2;ERBB2;AKT1;GPER1;IFNG;AR;ITGAM;ITGB1;USP17L2;RHOG;LGALS3;MMP14;TREM2;MAPK8;BCL2L1;ACTB;SLC1A1;TGFB1;TNF;EZR;SQSTM1;WNT3A	3.87531	3.04609e-12
GOBP_INTERLEUKIN_4_PRODUCTION	GATA3;HLA-DRB1;IL1RAP;LGALS9;FOXP3;ZP3;IL33;CD86;CD40LG	13.3862	3.35549e-12
GOBP_REGULATION_OF_NEUTROPHIL_CHEMOTAXIS	DNM1L;CCR7;DPP4;EDN1;DAPK2;CXCL8;CXCR2;MDK;IL23A;CCL19;CCL21;SLIT2;CD74	13.3862	3.35549e-12
GOBP_SEQUESTERING_OF_CALCIUM_ION	CCR5;CCR7;DRD2;F2;F2R;FGF2;GPER1;GSTM2;FASLG;IL13;CXCL10;ITGB3;LHCGR;LYN;CXCL9;NOS1;P2RY6;PSEN1;PTPRC;BAX;CCL19;CCL21;CX3CL1;THY1;TRPV1;CD19	4.4957	3.60851e-12
GOBP_STEROID_BIOSYNTHETIC_PROCESS	CFTR;CYP2R1;ADM;CRH;CYP1A1;CYP3A4;CYP11A1;CYP17A1;CYP19A1;EGR1;FGF1;AKR1B1;SIRT1;FSHB;NR5A1;NR3C1;HSD3B1;HSD3B2;HSD17B1;HSD17B3;HSD17B2;IFNG;APOE;IGF1R;IGFBP7;IL1A;LBR;LEP;LHB;LHCGR;MIR30C1;MIR33A;NFKB1;HSD17B7;WNT4;MED1;PRLR;SNAI2;SNAI1;SOD1;SRD5A1;SRD5A2;STAR;TSPO;TNF;DHRS11;AKR1C3	3.78016	3.63731e-12
GOBP_REGULATION_OF_INTRACELLULAR_PROTEIN_TRANSPORT	CIB1;LRRK2;MAPK14;ERBB2;GLI3;ANGPT1;GSK3B;IFI27;IFNG;IL1B;ITGAM;USP17L2;LEP;SMAD3;VPS11;MAPK8;PSEN1;PTGS2;SLC1A1;BMP4;TGFB1;TXN;HYAL2;HDAC3;ADIPOQ;CD36;CDK1;CDH1	3.37562	3.76276e-12
GOBP_NEGATIVE_REGULATION_OF_T_CELL_APOPTOTIC_PROCESS	ADA;KIFAP3;HIF1A;IL7R;IDO1;BCL2;CCL5;BMP4	21.1222	3.76707e-12
GOBP_POSITIVE_REGULATION_OF_SMOOTH_MUSCLE_CELL_PROLIFERATION	DNMT1;AGT;HBEGF;S1PR1;EDN1;AIF1;AKT1;FGF2;FGF9;FGFR2;GJA1;FOXP1;HDAC1;HPGD;ID2;IGF1;IGF1R;IL6;IL10;IL13;IL18;ITGA2;ITGB3;JUN;HES5;MIR17;MIR20A;MIR21;MIR214;MIR27B;MMP2;MMP9;MNAT1;MIR135B;P2RY6;PDGFRB;PIK3CA;PTGS2;CCL5;CX3CL1;BMP4;SRC;TERT;TGFB1;THBS1;TLR4;TNF	5.37954	3.77716e-12
GOBP_ORGANIC_HYDROXY_COMPOUND_BIOSYNTHETIC_PROCESS	CDH3;CFTR;CYP2R1;CYP3A4;CYP19A1;FGF1;FGF2;SIRT1;ALOX15;GATA3;GBA;GPER1;HSD17B1;HSD17B3;IFNG;APOE;IMPA2;LBR;LEP;LHCGR;MIR30C1;MIR33A;MAS1;NFKB1;P2RY6;HSD17B7;WNT4;SNAI2;SNAI1;SOD1;SRD5A2;STAR;TGFB2;TNF;AKR1C3;HAND2	3.24047	3.82666e-12
GOBP_DNA_METABOLIC_PROCESS	CDKN1A;CARM1;CIB1;CTCF;PPARGC1A;BRD8;PARP1;CCN2;CTNNB1;CYP1A1;CYP1B1;DNMT1;DNMT3A;DNMT3B;EGF;EGFR;TET3;ERCC1;ERCC2;AKT1;ERCC6;EZH2;FANCD2;FEN1;FGF2;FOXM1;DICER1;SIRT1;FOS;POLDIP2;GATA3;GREM1;ANKRD1;GLI1;MSH6;GTF2H1;DNMT3L;TBX21;H2AX;HGF;HMGB1;HMGA1;APEX1;HSPD1;IGF1R;IL2;IL4;IL6;IL7R;IL10;ISG20;LOX;MIR29C;MAS1;MECP2;MLH1;MNAT1;MSH2;MYC;ATM;NME1;NT5E;OGG1;FOXP3;PCNA;PDGFA;PDGFRB;PIK3CA;POLD1;POLE;P…	1.91169	3.9891e-12
GOBP_REGULATION_OF_INSULIN_SECRETION	CFTR;UCN3;CNR1;DRD2;FOXO1;GPER1;HIF1A;HLA-DRB1;FOXA2;IFNG;IL1B;IL6;LEP;NOS2;PSMD9;CCL5;SFRP1;TNF;TRH;NR0B2;CASR;IRS2;CLOCK	4.16482	4.04562e-12
GOBP_RESPONSE_TO_REACTIVE_OXYGEN_SPECIES	TXNIP;CHUK;LRRK2;COL1A1;CRK;SIRPA;CYP1B1;EDN1;EGFR;AKT1;ERCC6;EZH2;FOXO3;SIRT1;FOS;FOXP1;GSTP1;ANXA1;HDAC2;HGF;HIF1A;HP;APEX1;APOE;IL1A;IL6;AQP1;IL10;JUN;AREG;ARG1;MIRLET7B;MIR17;MIR21;MIR34A;MET;MMP2;MMP9;MPO;NFE2L2;NOS3;PAX2;PCNA;PDGFRA;PDGFRB;AXL;MAPK1;MAPK3;MAPK8;BCL2;RELA;SDC1;BMP7;SOD1;SOD2;SRC;STAT6;TACR1;BTK;TXN;CASP3;CAT;AKR1C3;BECN1;HYAL2;CD36;CDK1	3.51789	4.16102e-12
GOBP_POSITIVE_REGULATION_OF_ION_TRANSMEMBRANE_TRANSPORT	CFTR;AGT;EDN1;EDNRA;EPHB2;F2;F2R;GPER1;GSTM2;IFNG;IL13;CXCL10;ITGB1;KCNQ1;LHCGR;MIR21;MIR210;CXCL9;NOS1;P2RX3;P2RX5;P2RY6;TREM2;PSEN1;BAX;CCL2;CX3CL1;WNK1;THY1;TRPC6;CCR2;ACTN4;SLC38A1;CD19;MS4A1	3.6933	4.25675e-12
GOBP_REGULATION_OF_CELLULAR_EXTRAVASATION	OLFM4;PLCB1;ICAM1;IL1R1;MDK;PTGER4;CCL21;CCL25;CXCL12;SELE;THY1;CCR2;CD47	10.5724	4.31534e-12
GOBP_REGULATION_OF_TOLL_LIKE_RECEPTOR_SIGNALING_PATHWAY	FCRL3;ESR1;F2RL1;PTPN22;HMGB1;BIRC2;BIRC3;TICAM2;LTF;LYN;MIR17;NINJ1;TREM2;TLR2;TLR3;CD14;CD36	6.26602	4.47721e-12
GOBP_REGULATION_OF_BIOMINERALIZATION	CFTR;OSR2;CCR1;S1PR1;AHSG;HEY1;GREM1;HIF1A;CCN1;LTF;SMAD3;NOS3;NOTCH1;ENPP1;WNT4;ANKH;PTN;ROCK1;RXRA;BMP4;BMP7;BMPR1B;SOX9;TGFB1;TGFB3;TWIST1;VDR;ACVR2B	5.14688	4.63773e-12
GOBP_INTEGRIN_MEDIATED_SIGNALING_PATHWAY	CCN2;FBLN1;FN1;HCK;ILK;ITGA2;ITGA5;ITGAM;ITGAV;ITGB1;ITGB3;ITGB8;LAMB1;PTN;SRC;THY1;TIMP1;VAV1;NRP1;CD40LG;CD47;CDC42	4.83034	4.69548e-12
GOBP_MOLTING_CYCLE	CDH3;FST;HPSE;CTNNB1;DLX3;EGFR;ERCC2;FGFR2;DKK1;INTU;HDAC1;HDAC2;RBPJ;INHBA;SMAD4;NGFR;NOTCH1;PDGFA;PTGS2;BCL2;RELA;SNAI1;SOX9;TERT;TGFB2;TNF;LGR5;ACVR1B;CLOCK	4.83034	4.69548e-12
GOBP_ENSHEATHMENT_OF_NEURONS	NDRG1;CTNNB1;ERBB2;ERCC2;AKT1;DICER1;MTOR;TNFRSF21;HGF;ILK;HES5;NTRK2;CLDN11;PTEN;PTN;SOD1;TLR2;CLDN5;TNF;TNFRSF1B;CXCR4	4.22278	5.08161e-12
GOBP_LEARNING	DRD2;AGT;EPHB2;DKK1;PLCB1;FOS;HIF1A;INSR;ITGB1;KRAS;MECP2;NTRK2;PPT1;PTGS2;PTN;SLC1A1;BRAF;TACR1;TLR2;CLDN5;UCN	4.12619	5.14941e-12
GOBP_EXTRACELLULAR_MATRIX_DISASSEMBLY	DPP4;IL6;MMP1;MMP2;MMP3;MMP7;MMP9;MMP12;MMP13;MMP14;PLG;FSCN1;TGFB1	7.24042	5.23725e-12
GOBP_POTASSIUM_ION_TRANSPORT	ABCC9;CDKN1B;DPP6;DRD2;NEDD4L;AQP1;ITGB1;KCNQ1;KCNQ2;MIR21;NOS1;NOS3;TREM2;RGS4;WNK1;VIP	3.20601	5.44759e-12
GOBP_CELL_DIVISION	KIF20A;CDK4;CDK6;CIB1;ZNRD2;TXNIP;CFL1;CKS1B;DRD2;ERCC2;ESRRB;FGF1;FGF2;FGF9;FGFR2;ITGB3BP;NUP62;POLDIP2;INTU;NR3C1;HOXB4;BIRC5;IGF1R;IL1A;IL1B;RHOC;STMN1;MIR145;MDK;MYC;NOTCH1;YBX1;PDGFA;PGF;PIK3CB;PLK1;POU5F1;PTN;RASA1;RB1;CCND1;BCL2L1;ROCK1;SFRP2;BRCA2;TERF1;TGFB1;TGFB2;TGFB3;VEGFA;VEGFC;WNT7A;HMGA2;FZD7;PROK1;CAT;BECN1;CCNB1;WNT3A;LMLN;CCNE1;CCNE2;CDK1;CDC6;CDC42	2.20667	6.08321e-12
GOBP_RESPONSE_TO_AXON_INJURY	DRD2;AIF1;EPO;FGF2;TNC;IGF1R;JUN;ARG1;LYN;MIR34A;MMP2;NTRK3;TREM2;AXL;MAP2K1;PTEN;PTN;BAX;BCL2;SLC1A1;SOD1;SOD2;SPP1;BRAF;TSPO;THY1;TYROBP;CDK1	5.66063	6.12374e-12
GOBP_TYPE_I_INTERFERON_PRODUCTION	LILRB1;CHUK;SIRPA;PTPN22;HSPD1;IL10;MIR21;MMP12;TLR2;TLR3;TLR4;CD14	5.07427	6.28773e-12
GOBP_POSITIVE_REGULATION_OF_T_CELL_MEDIATED_IMMUNITY	CD55;GATA3;TBX21;HLA-B;HLA-DRB1;HLA-G;HSPD1;IL1B;IL1R1;IL4;IL6;IL12B;IL12RB1;IL18;FOXP3;IL23A;B2M;PTPRC;PVR;ZP3;IL18R1	7.5572	6.81793e-12
GOBP_TRABECULA_MORPHOGENESIS	COL1A1;S1PR1;HEY1;GREM1;SLC40A1;RBPJ;MMP2;NOTCH1;DLL4;MED1;SFRP1;BMP7;TEK;TGFB2;TGFBR1	9.30526	7.25779e-12
GOBP_CELL_PROJECTION_ASSEMBLY	ABCC4;YAP1;CCR7;DOCK11;S1PR1;AIF1;EPHB2;F2RL1;LPAR3;MTOR;MSTN;INTU;GSK3B;ICAM1;ITGB1;USP17L2;KCNQ1;RHOG;MIR214;TACSTD2;NOTCH1;PDGFA;PIK3CA;FGD6;ROCK1;CCL19;CCL21;ATG3;FSCN1;SRC;TGFB3;TGFBR1;EZR;NRP1;S1PR2;SLIT2;CDC42	2.23496	7.57871e-12
GOBP_MUCOPOLYSACCHARIDE_METABOLIC_PROCESS	UST;HPSE;DCN;EDNRA;EGF;FGF2;ANGPT1;HAS1;IL1B;IL15;NFKB1;TGFB1;NDNF;HYAL2;CHST3;CD44	5.38097	7.88701e-12
GOBP_REGULATION_OF_EXOCYTOSIS	CFTR;LRRK2;CNR1;ADRA1A;DRD2;F2RL1;FGA;GATA2;GSK3B;ANXA1;ANXA2;IFNG;IL4;IL13;ITGAM;LGALS9;LYN;NOTCH1;PRKCB;SDC1;SDC4;BRAF;SYP;SYT1;CCR2;WNT7A;ZP3	3.38897	8.17948e-12
GOBP_CEREBRAL_CORTEX_DEVELOPMENT	CRK;CTNNB1;ARX;EGFR;EMX2;PLCB1;GLI3;GSK3B;H2AX;HIF1A;LAMB1;MDK;NTRK2;PSEN1;BAX;SLC2A1;SRD5A1;SLIT2	4.71087	8.26376e-12
GOBP_POSITIVE_REGULATION_OF_MIRNA_METABOLIC_PROCESS	EGR1;ETS1;FGF2;FOXO3;FOS;GATA2;GATA3;NR3C1;HIF1A;IL10;JUN;SMAD3;SMAD4;MYB;MYC;NFKB1;NGFR;PPARG;PRL;RELA;STAT3;TERT;TGFB1;TGFB2;TNF;TP53;WT1	7.93352	8.62214e-12
GOBP_GLOMERULUS_DEVELOPMENT	AGTR2;EDNRA;EGR1;ANGPT1;ANGPT2;AQP1;ITGB3;NOTCH1;PAX2;PDGFA;PDGFRA;PDGFRB;SULF2;ACTA2;BCL2;BMP4;BMP7;TCF21;TEK;WT1;PROM1;ADIPOQ	6.6447	8.83644e-12
GOBP_NEGATIVE_REGULATION_OF_T_CELL_PROLIFERATION	LILRB2;LILRB1;CTLA4;ERBB2;TNFRSF21;CD274;HLA-DRB1;HLA-G;IHH;IL2RA;IL10;IDO1;ARG1;LGALS9;MIR181C;FOXP3;PTEN;SDC4;BMP4;CASP3;CD86	6.6447	8.83644e-12
GOBP_POSITIVE_REGULATION_OF_PHOSPHATIDYLINOSITOL_3_KINASE_SIGNALING	CSF3;DCN;AGT;EGF;F2;F2R;F2RL1;FGF2;FLT1;FN1;SIRT1;FSHR;GH1;ANGPT1;GPER1;HGF;IGF1;IGF1R;IL18;INSR;KDR;LEP;MIR126;MIR21;NTRK2;NTRK3;PDGFA;PDGFRA;PDGFRB;TREM2;MYDGF;CCL5;SOX9;SRC;TEK;TGFB2;TNF;CAT;BECN1;SEMA3E	6.02017	9.33229e-12
GOBP_NEGATIVE_REGULATION_OF_INTERLEUKIN_12_PRODUCTION	LILRB1;CCR7;IL10;MIR21;NFKB1;THBS1	29.5514	1.03003e-11
GOBP_CELLULAR_HORMONE_METABOLIC_PROCESS	ADM;CRABP2;CYP1A1;CYP1A2;CYP1B1;CYP3A4;CYP11A1;CYP17A1;CYP19A1;CYP26A1;AKR1C1;AKR1C2;EGR1;ESR1;AKR1B1;FSHB;HSD3B1;HSD3B2;HSD17B1;HSD17B3;HSD17B2;LHB;LIPE;HSD17B7;PDGFRA;WNT4;UGT2B28;UGT1A1;MED1;RBP1;SPP1;SRD5A1;SRD5A2;SULT1E1;SULT1A1;TSPO;DHRS11;AKR1C3	4.20047	1.04168e-11
GOBP_CELL_CELL_JUNCTION_ASSEMBLY	CLDN4;CLDN3;CLDN7;CTNNB1;GPBAR1;ACE;AGT;EPHB2;GJA1;GJB2;IL1B;IL17A;RHOC;MIR142;CLDN11;PRKCA;ACTB;ROCK1;SNAI2;SNAI1;FSCN1;CLDN5;TNF;CLDN1	4.01448	1.04582e-11
GOBP_REGULATION_OF_PLATELET_ACTIVATION	F2;APOE;IL6;LYN;NOS3;PDGFA;PDGFRA;PRKCA;TLR4	8.38783	1.0525e-11
GOBP_ICOSANOID_BIOSYNTHETIC_PROCESS	EDN1;SIRT1;HPGDS;ANXA1;IL1B;MIR132;MIR204;MIF;PTGS2;AKR1C3;PTGES;CD74	7.34711	1.05985e-11
GOBP_PROTEIN_MODIFICATION_BY_SMALL_PROTEIN_CONJUGATION_OR_REMOVAL	PDCD6;LRRK2;CTNNB1;EGR1;AKT1;NEDD4L;SIRT1;RNF19A;PTPN22;ANGPT1;MYLIP;HIF1A;BIRC2;BIRC3;IFI27;USP17L2;LIMK1;ARNT;MDM2;NFE2L2;HERC5;PLK1;VPS11;PSEN1;PSMD10;PTEN;BCL2;RELA;ATG3;SKP2;BRCA1;BRCA2;TGFBR1;TSPO;UCHL1;AIMP2;RNF34;AXIN1;HDAC3;SQSTM1;BCL10;USP10;MTA1;COPS2;MED17;CDK1;CDC42	1.89578	1.06708e-11
GOBP_REGULATION_OF_CELL_CYCLE_PROCESS	KIF20A;CDK4;CDKN1A;CDKN1B;CDKN2A;CTCF;PHB2;MAPK14;CCN2;CTNNB1;CYP1A1;DRD2;DUSP1;EDN1;EGF;EGFR;AIF1;ERCC2;AKT1;ERCC6;EZH2;FANCD2;FEN1;PLCB1;SIRT1;NUP62;POLDIP2;GLI1;GPER1;TMOD3;ANXA1;H2AX;HLA-G;HOXA13;APEX1;BIRC5;ID2;IGF1;IGF1R;IL1A;IL1B;INHBA;INSR;USP17L2;LIF;MIR195;MIR214;MIR29C;MIR30C2;MDM2;MECP2;MNAT1;MSH2;MUC1;MYC;ATM;PDGFRB;PLK1;WNT4;MED1;PPP2R1A;PTEN;MIR451A;MIR503;RB1;CCND1;BCL2;BCL2L1;ACT…	2.0908	1.18257e-11
GOBP_REGULATION_OF_ACUTE_INFLAMMATORY_RESPONSE	CCR7;CNR1;GSTP1;IL1B;IL4;IL6;PIK3CG;PTGS2;BTK;TNF;C3;ZP3;PTGES	8.94715	1.22969e-11
GOBP_ACUTE_PHASE_RESPONSE	CNR1;CRP;AHSG;EPO;F2;FN1;HP;IL1A;IL1B;IL6;MBL2;IL22;SERPINA1;UGT1A1;PTGS2;TNF;TRPV1;CD163;PTGES	8.94715	1.22969e-11
GOBP_GRANULOCYTE_ACTIVATION	F2RL1;ANXA1;CXCL8;CXCR2;IL15;IL18;ITGAM;ENPP3;PLA2G2A;CCL5;TNF;CCR2;TYROBP	8.94715	1.22969e-11
GOBP_VIRAL_GENOME_REPLICATION	ADAR;CXCR6;NR5A2;IFI27;IFIT1;CXCL8;ISG20;LTF;MIR141;NOTCH1;PPARA;BCL2;CCL2;CCL5;SLPI;TNF;HMGA2	4.37932	1.2552e-11
GOBP_SMOOTH_MUSCLE_CONTRACTION	ADA;CHRM3;ADRA1A;ADRA2B;DRD2;AGT;EDN1;EDNRA;F2R;GDNF;GPER1;ITGA2;MIR143;MIR145;MIR21;OXTR;P2RX3;SULF2;PTGS2;ACTA2;ROCK1;SOD1;TACR1;TRPV1;CALCA	4.75523	1.29755e-11
GOBP_ACTIN_MEDIATED_CELL_CONTRACTION	ABCC9;NEDD4L;GJA1;KCNQ1;PIK3CA;ACTA2;ROCK1;STC1	5.06668	1.31186e-11
GOBP_POSITIVE_REGULATION_OF_NITRIC_OXIDE_METABOLIC_PROCESS	KLRC4-KLRK1;AGT;AGTR2;EDN1;AIF1;AKT1;KLRK1;IFNG;IL1B;INSR;SMAD3;PTGS2;SOD2;TLR4;TNF;TRPV1;CD36	9.65256	1.35943e-11
GOBP_REGULATION_OF_EXTRACELLULAR_MATRIX_ORGANIZATION	CPB2;DPP4;AGT;IL6;ITGB3;LAMB1;SMAD3;NOTCH1;RB1;FSCN1;SOX9;TGFB1;TNFRSF1A;TNFRSF1B;RUNX1	7.69293	1.36644e-11
GOBP_DEPHOSPHORYLATION	LILRB2;CDKN3;FCRL3;SGPP2;DRD2;DUSP1;DUSP2;DUSP6;AGTR2;MTOR;ALPI;ALPP;PTPN22;GBA;GSK3B;IFNG;IMPA2;ITGA2;LGALS3;SMAD3;PDGFRB;ACP1;PPP2R1A;PPP5C;PTBP1;PTEN;PTPRC;PTPRD;BCL2;ROCK1;SRC;TGFB1;TGFB2;TNF;PPP1R2C	2.68048	1.41913e-11
GOBP_NUCLEAR_TRANSPORT	CDKN1A;TXNIP;KHDRBS1;AKAP13;PHB2;LRRK2;MAPK14;CSE1L;AGT;ELAVL1;AKT1;FGF9;NUP210;NUP62;GLI3;ANGPT1;GSK3B;IFI27;IFNG;IL1B;LEP;SMAD3;MMP12;NFKBIA;NOTCH1;MED1;PSEN1;PTGS2;BMP4;STAT3;TGFB1;TP53;TXN;RGPD2;THOC6;AXIN1;HYAL2;HDAC3;SQSTM1;CD36;IPO13;CDK1;CDH1	2.77278	1.44172e-11
GOBP_ESTABLISHMENT_OF_ORGANELLE_LOCALIZATION	CDH3;PDCD6;RASGRP1;CFL1;LRRK2;CTNNB1;KIFAP3;NUP62;GATA2;GJA1;HIF1A;BIRC5;IFNG;IL4;IL13;ITGB1;LGALS9;LMNB1;LYN;MAP2;MLH1;ATM;RMDN1;PIK3CD;PIK3CG;PLK1;SYBU;PSEN1;SDC1;SDC4;SLC2A4;BTK;TERF1;UCHL1;EZR;YWHAZ;ACTN4;BECN1;CCNB1;CDC42	2.47141	1.53579e-11
GOBP_ICOSANOID_METABOLIC_PROCESS	CYP1A1;CYP1A2;CYP1B1;CYP2B6;CYP2C19;AKR1C1;AKR1C2;EDN1;AKR1B1;SIRT1;ALOX15;HPGDS;GPX4;GSTM1;GSTP1;ANXA1;HPGD;IL1B;CYP4F3;MIR132;MIR204;MIF;PTGS2;TLR2;TNFRSF1A;AKR1C3;PTGES;CD74	4.4571	1.54123e-11
GOBP_REGULATION_OF_DNA_BIOSYNTHETIC_PROCESS	CDKN1A;CTNNB1;CYP1B1;FGF2;GREM1;ANKRD1;HGF;MYC;ATM;PCNA;PDGFA;PDGFRB;MAPK1;MAPK3;MAP2K7;SMOC2;SRC;TERF1;TFDP1;TNF;TP53;STN1;ADIPOQ	4.4571	1.54123e-11
GOBP_POSITIVE_REGULATION_OF_CELL_GROWTH	YAP1;CIB1;CRABP2;HBEGF;EDN1;MEGF8;EGFR;ERBB2;AKT1;EXTL3;F2;NEDD4L;FN1;LPAR3;MTOR;IGF1;IGFBP1;IL2;IL9;L1CAM;LIMK1;MMP14;NGF;PSMD10;CXCL16;BCL2;BDNF;CXCL12;SFRP1;SFRP2;SYT1;ADAM17;TGFB2;TGFBR1;UCN;VEGFA;CXCR4;NRP1;WNT3A;CDC42	3.79559	1.54253e-11
GOBP_REGULATION_OF_CELLULAR_CARBOHYDRATE_METABOLIC_PROCESS	PPARGC1A;AKT1;FOXO1;SIRT1;MTOR;GPER1;NR3C1;GSK3B;FOXA2;IGF1;IGFBP3;INSR;LEP;LEPR;LHCGR;MIR195;MIR210;MAS1;MST1;P2RY6;ENPP1;PPARA;SRC;STAT3;TFF3;TP53;IRS2;ADIPOQ;NCOR1	3.94235	1.6567e-11
GOBP_TUBE_FORMATION	BCL2L11;CTHRC1;ADM;CTNNB1;EGF;FGF2;FGFR2;GATA3;GREM1;GDNF;HIF1A;HES5;MIR210;NOTCH1;PAX2;PIK3CD;WNT4;SALL4;BRD2;SDC4;SFRP1;SFRP2;BMP4;BMP7;SOX9;HNF1B;TGFB1;TGFB2;TWIST1;VEGFA;YWHAZ;PAX8;CASP3;BCL10	3.94235	1.6567e-11
GOBP_ESTABLISHMENT_OF_ENDOTHELIAL_BARRIER	HPSE;CLDN3;EDNRA;F2RL1;PLCB1;ICAM1;IL1B;FOXP3;ROBO4;ROCK1;CLDN5;TNF;TNFRSF1A;VEGFA;EZR;CLDN1;S1PR2	8.10805	1.70627e-11
GOBP_CELL_CYCLE_PHASE_TRANSITION	CDK4;CDK6;CDKN1A;CDKN1B;CDKN2A;CDKN3;KHDRBS1;PHB2;CKS1B;MAPK14;CYP1A1;DUSP1;EGFR;EIF4EBP1;AIF1;ERCC2;AKT1;ERCC6;ESRRB;EZH2;FANCD2;FOXM1;PLCB1;GLI1;TMOD3;ANXA1;H2AX;APEX1;BIRC5;ID2;INHBA;ITGB1;USP17L2;MIR195;MIR214;MIR29C;MIR30C2;MDM2;MECP2;MNAT1;MSH2;MUC1;MYC;ATM;PLK1;POLE;PTEN;MIR451A;MIR503;PTPRC;RB1;CCND1;BCL2;ACTB;CCL2;SKP2;SMARCC1;SOX2;BRCA1;BRCA2;ADAM17;TERT;TFDP1;TP53;XRCC3;ARID1A;KLF11;CC…	2.24787	1.7255e-11
GOBP_GENERATION_OF_PRECURSOR_METABOLITES_AND_ENERGY	CEBPA;MTCO2P12;PPARGC1A;PHB2;CYB5A;CYP1A2;CYP19A1;ENO1;AKT1;AKR1B1;MTOR;GBA;GSK3B;HIF1A;HK1;IFNG;IGF1;IL4;IDO1;INSR;LEP;LEPR;ARNT;MIR195;MIR210;MAOB;MSH2;MYC;NOS2;ENPP1;PIK3CA;PPARA;PSEN1;SOD2;SRD5A1;STAT3;TNF;TP53;UCN;CAT;IRS2;SUCLG2;CCNB1;ADIPOQ;NCOR1;CDK1	2.35046	1.75908e-11
GOBP_TYROSINE_PHOSPHORYLATION_OF_STAT_PROTEIN	CSF1R;CSF2;EPO;GH1;HDAC2;IFNG;IGF1;IL2;IL4;IL6;IL12B;IL13;IL15;IL18;JAK1;HES5;LEP;LIF;LYN;IL23A;PPP2R1A;IL21;CCL5;TNF;TNFRSF1A;VEGFA;TSLP	5.5733	1.78831e-11
GOBP_POSITIVE_REGULATION_OF_LIPID_BIOSYNTHETIC_PROCESS	ADM;CREB1;AKT1;FGF1;MTOR;FSHB;ANXA1;HSD17B13;IFNG;APOE;IGF1R;CCN1;IL1A;IL1B;WNT4;PPARA;PTGS2;STAR;TNF;CD74	5.5733	1.78831e-11
GOBP_PALLIUM_DEVELOPMENT	CDK6;CRK;CTNNB1;ARX;EGFR;EMX2;EZH2;PLCB1;GLI3;GSK3B;H2AX;HDAC1;HIF1A;HSD3B1;HSD3B2;IGF1R;LAMB1;MAS1;MDK;NTRK2;PSEN1;PTEN;BAX;SLC2A1;SRD5A1;SRD5A2;XRCC1;CASP3;WNT3A;SLIT2	3.70188	1.81059e-11
GOBP_CARDIAC_VENTRICLE_MORPHOGENESIS	SEMA3C;EDNRA;FGFR2;HEY1;GATA3;HIF1A;RBPJ;SMAD4;NOTCH1;DLL4;MED1;SFRP2;BMP4;TGFB1;TGFB2;TGFBR1;HAND2	6.34959	1.91943e-11
GOBP_PURINE_CONTAINING_COMPOUND_METABOLIC_PROCESS	ADA;DNM1L;MTCO2P12;PPARGC1A;LRRK2;PARP1;ENO1;MTOR;HIF1A;HK1;ACACA;HPRT1;IFNG;IGF1;IL4;INSR;ARNT;NME1;NOS1;NOS2;NOS3;NT5E;ENPP1;ENPP3;TREM2;PPARA;PPT1;PSEN1;STAT3;SULT1E1;SULT1A1;SULT2A1;TGFB1;TSPO;CARD11;SUCLG2;TECR;NCOR1	2.34474	1.96523e-11
GOBP_CELLULAR_MACROMOLECULE_CATABOLIC_PROCESS	MIR543;TOB1;CEBPA;HPSE;LRRK2;MAPK14;CTNNB1;DDX5;EGF;ELAVL1;AKT1;FEN1;ZHX2;NEDD4L;DICER1;SIRT1;RNF19A;GBA;GDNF;ANG;CCDC22;MYLIP;GSK3B;TBX21;APEX1;BIRC2;IFI27;IL6;EIF3E;ISG20;USP17L2;MDM2;MLH1;MMP12;ATM;NFE2L2;YBX1;HERC5;PLK1;PPT1;PRKCA;PSEN1;PSMD2;PSMD9;PSMD10;PTEN;BAX;RNASE3;ROCK1;SKP2;SMARCC1;BTK;TGFB1I1;TNFRSF1B;UCHL1;VIM;VIP;XBP1;ZFP36;BAG6;RNF34;AXIN1;SQSTM1;IL33;USP10;MTA1;CLOCK	1.88574	1.99642e-11
GOBP_MORPHOGENESIS_OF_A_POLARIZED_EPITHELIUM	CTHRC1;DKK1;ASTN2;INTU;ACTB;SFRP1;SFRP2;EZR;WNT7A;FZD7;CDC42	5.13548	2.02069e-11
GOBP_ENDODERMAL_CELL_DIFFERENTIATION	CTNNB1;DKK1;FN1;GATA6;INHBA;ITGA5;ITGAV;LAMB1;MMP2;MMP9;MMP14;POU5F1;MAP2K1;SOX2;HNF1B;VTN;NANOG;HMGA2	8.61557	2.04815e-11
GOBP_REGULATION_OF_LEUKOCYTE_DEGRANULATION	F2RL1;GATA2;IL4;IL13;ITGAM;LGALS9;LYN;CCR2	8.61557	2.04815e-11
GOBP_ERYTHROCYTE_HOMEOSTASIS	CDK6;ADAR;MAPK14;EPO;ERCC2;ETS1;FOXO3;GATA2;GATA3;TMOD3;HIF1A;ID2;INHA;INHBA;KCNQ1;ARNT;LYN;MYB;KLF13;MED1;AXL;B2M;RB1;BCL6;BMP4;STAT3;THRA;VEGFA;ZFP36;CASP3;ACVR1B;SFXN1	4.17731	2.1341e-11
GOBP_NEGATIVE_REGULATION_OF_LYMPHOCYTE_DIFFERENTIATION	CTLA4;ERBB2;GLI3;TBX21;ANXA1;HMGB1;ID2;IHH;IL2;IL4;INHA;INHBA;MIR21;MDK;FOXP3;BCL6;SFRP1;BMP4;RUNX1;RUNX3;CD74	7.46649	2.13876e-11
GOBP_B_CELL_HOMEOSTASIS	ADA;BCL2L11;DOCK11;HIF1A;IL7R;LYN;MIF;FOXP3;BAX;BCL2;CASP3;BCL10;CD74	12.6783	2.1775e-11
GOBP_NEGATIVE_REGULATION_OF_WNT_SIGNALING_PATHWAY	CTHRC1;MAPK14;CTNNB1;EGR1;FGF9;DKK1;FOXO1;FOXO3;GREM1;RBMS3;GLI1;GLI3;GSK3B;HDAC1;APOE;IGFBP1;IGFBP6;MIR29C;MDK;NOTCH1;SFRP1;SFRP2;SNAI2;SOX2;SOX9;AXIN1	3.67335	2.23354e-11
GOBP_POSITIVE_REGULATION_OF_ENDOTHELIAL_CELL_PROLIFERATION	PDCD6;AGTR1;EGF;AKT1;F3;FGF2;SIRT1;GATA2;ANG;HIF1A;HMGB1;NR4A1;IL10;ITGB3;JUN;KDR;ARG1;ARNT;MIRLET7B;MIR10B;MIR126;MIR132;MIR21;MIR27B;MDK;MIR135B;NRAS;PGF;PIK3CD;PRKCA;MYDGF;MIR503;CCL11;CXCL12;BMP4;STAT3;ADAM17;TEK;TGFBR1;VEGFA;VEGFC;VIP;PROK1;NRP1	4.63616	2.26206e-11
GOBP_REGULATION_OF_RECEPTOR_SIGNALING_PATHWAY_VIA_STAT	CYP1B1;AGT;EGF;EPHB2;F2;F2R;GH1;IFNA1;IFNA13;IFNG;IL4;IL6;IL7R;IL9;IL10;IL12B;HES5;LEP;LIF;MST1;NOTCH1;IL23A;PPARG;PPP2R1A;PRL;PRLR;PTPRC;PTPRD;CCL5;TGFB1;TNF;TYK2;TSLP	4.63616	2.26206e-11
GOBP_REGULATION_OF_ANION_TRANSPORT	CFTR;AGT;EDN1;IL1A;IL1B;ITGB1;ARG1;LEP;MIR33A;MIF;PSEN1;RGS4;SSTR4;STC1;TNF;TRH;CA2;SLC38A1;PTGES	5.29506	2.26586e-11
GOBP_POSITIVE_REGULATION_OF_B_CELL_PROLIFERATION	ADA;CDKN1A;FCRL3;EPHB2;IL2;IL4;IL7;IL13;MIF;PRLR;PTPRC;IL21;BCL2;BCL6;BTK;TLR4;CARD11;IRS2;WNT3A;CD74	9.25015	2.33968e-11
GOBP_MULTICELLULAR_ORGANISMAL_SIGNALING	ABCC9;SCN11A;AGT;S1PR1;MTOR;GBA;GJA1;GPER1;ITGA2;KCNQ1;NTRK2;P2RX3;SOD1	3.73476	2.3729e-11
GOBP_REGULATION_OF_ACTOMYOSIN_STRUCTURE_ORGANIZATION	AKAP13;CCN2;S1PR1;EDN1;MTOR;RHOC;STMN1;LIMK1;MIR20A;MIR21;TACSTD2;SMAD3;SMAD4;MET;PAK1;WNT4;PTGER4;ROCK1;SDC4;SFRP1;BRAF;TACR1;TGFB3;TGFBR1;ARHGAP28;NRP1;CD47;CDC42	4.92373	2.37681e-11
GOBP_REGULATION_OF_HOMOTYPIC_CELL_CELL_ADHESION	IL6;JAK1;LYN;PRKCA;CCL5	11.1546	2.47342e-11
GOBP_ADENYLATE_CYCLASE_ACTIVATING_G_PROTEIN_COUPLED_RECEPTOR_SIGNALING_PATHWAY	AKAP13;UCN3;CNR1;ADM;CRHR1;ADRA1A;ADRA2B;DRD2;S1PR1;LPAR3;FSHR;GHRH;GHRHR;GPER1;IAPP;CXCL10;LHCGR;CXCL9;OPRM1;PF4;PRKCA;PTGER2;PTGER4;PTGFR;RXFP1;SSTR4;VIP;CALCA;UCN2;LPAR2;S1PR2	3.87369	2.59959e-11
GOBP_REGULATION_OF_OSTEOCLAST_DIFFERENTIATION	LILRB1;CCR1;CREB1;CSF1;CTNNB1;FBN1;FOS;MTOR;FSHB;IAPP;IFNG;IL4;IL12B;IL17A;LTF;TNFRSF11B;IL23A;TREM2;SFRP1;KLF10;TLR3;TLR4;TNF;TYROBP;RASSF2	6.54957	2.69826e-11
GOBP_RESPONSE_TO_CARBOHYDRATE	CDKN1B;TXNIP;CFTR;UCN3;CPB2;CCN2;ACE;EGR1;ERCC1;FOXO3;PLCB1;GHRHR;ANGPT2;GPER1;HIF1A;HLA-DRB1;FOXA2;APOA2;ICAM1;IGF1R;IL1A;IL1B;ITGA2;LEP;LYN;SMAD2;SMAD4;P2RX3;PAX2;SERPINF1;PIK3CA;TREM2;PRKCB;MAP2K7;PTGS2;RAF1;SOD2;HNF1B;THBS1;TNF;XBP1;CASP3;NR0B2;CASR;CAT;IRS2;ACVR2B;ADIPOQ	3.1696	2.72881e-11
GOBP_POSITIVE_REGULATION_OF_AXONOGENESIS	PLXNC1;CRABP2;MEGF8;PLXND1;FN1;LPAR3;L1CAM;LIMK1;NGF;NTRK2;MAP2K1;BDNF;CXCL12;BRAF;VEGFA;NRP1;WNT3A;SLIT2	5.92743	2.77654e-11
GOBP_ESTABLISHMENT_OF_PROTEIN_LOCALIZATION_TO_ORGANELLE	CDKN1A;TXNIP;PHB2;LRRK2;MAPK14;CSE1L;AGT;ELAVL1;AKT1;FGF9;NUP62;GLI3;ANGPT1;HK1;HSPA4;HSPD1;IFNG;LEP;LHCGR;SMAD3;MMP12;NFKBIA;NOTCH1;MED1;VPS11;MAPK8;PSEN1;PTGS2;BAX;BMP4;BRCA2;STAT3;TERF1;TERT;TGFB1;TSPO;TP53;RGPD2;BAG6;BECN1;HYAL2;HDAC3;SQSTM1;CD36;IPO13;CD68;CDK1;CDH1	2.43706	2.78599e-11
GOBP_OVULATION_CYCLE	CYP1B1;EGR1;ESR1;FOXO3;SIRT1;FSHB;FSHR;NR5A1;MSTN;AMH;ANXA1;IGF1R;INHBA;KISS1;LEP;LHCGR;MDK;MMP2;NOS3;OPRM1;OXTR;PCNA;PDGFRA;SERPINF1;PGR;AXL;RETN;PTN;BMPR1B;SLIT3;SRC;TGFB2;TGFB3;TIMP4;ZP3;CASP3;SLIT2	6.21155	2.79401e-11
GOBP_CELLULAR_TRANSITION_METAL_ION_HOMEOSTASIS	ABCB6;CCDC22;SLC40A1;HIF1A;IFNG;MIR210;SMAD4;MYC;SLC1A1;SOD1	4.57883	2.96982e-11
GOBP_REGULATION_OF_RECEPTOR_MEDIATED_ENDOCYTOSIS	DRD2;EGF;DKK1;GREM1;GH1;ANGPT1;ANXA2;IL4;INSR;ITGAV;ITGB3;MIR17;MIR205;MIR27B;NTF3;SERPINE1;PIK3CB;PPT1;PSEN1;B2M;CCL19;CCL21;SELE;C3;VEGFA;VTN;WNT3A;ADIPOQ	4.57883	2.96982e-11
GOBP_ORGANIC_CYCLIC_COMPOUND_CATABOLIC_PROCESS	ADA;MIR543;TOB1;SMPDL3A;COMT;CRMP1;MAPK14;CYP1A1;CYP1A2;CYP3A4;CYP19A1;DDX5;DIO2;DPYSL2;ELAVL1;TET3;AKT1;FEN1;ZHX2;DICER1;GALT;GDNF;ANG;HPRT1;APEX1;APOE;IL6;IDO1;EIF3E;ISG20;STS;MAOA;MAOB;MLH1;ATM;NFE2L2;YBX1;NT5E;OGG1;ENPP1;ENPP3;UGT1A1;PRKCA;BAX;RNASE3;ROCK1;SPP1;SRD5A1;SRD5A2;SULT1E1;TNFRSF1B;VIM;VIP;ZFP36;TET1;SUCLG2;ENTPD1	2.29671	3.12389e-11
GOBP_RESPONSE_TO_LIGHT_STIMULUS	CDKN1A;PARP1;AGRP;DRD2;EGFR;NR2F6;ERCC1;ERCC2;AKT1;ERCC6;FEN1;SIRT1;FOS;MSH6;HIF1A;ID2;AQP1;IL12B;ITGB1;KRAS;MECP2;MME;MMP1;MMP2;MMP3;MMP9;MSH2;MYC;OGG1;PCNA;POLD1;MAPK8;MAP2K7;PTGS2;BAX;CCND1;BCL2;RELA;SAG;BRAF;BRCA2;TIMP1;TP53;CASP3;CAT;HYAL2;MTA1;CLOCK	2.76439	3.1431e-11
GOBP_RECEPTOR_INTERNALIZATION	LILRB1;ADM;DRD2;EGF;DKK1;GREM1;GH1;ANGPT1;ANXA2;CXCL8;CXCR1;CXCR2;INSR;ITGB1;ITGB3;NTF3;ACKR3;SAG;SELE;VEGFA;EZR;WNT3A;CD36	4.43654	3.18398e-11
GOBP_ENDOCARDIAL_CUSHION_DEVELOPMENT	HEY1;RBPJ;SMAD4;MDM2;NOS3;NOTCH1;BMP4;BMP7;SNAI2;SNAI1;SOX9;TGFB1;TGFB2;TGFB3;TGFBR1;TWIST1	8.30768	3.3567e-11
GOBP_NEGATIVE_REGULATION_OF_DNA_BINDING_TRANSCRIPTION_FACTOR_ACTIVITY	CDKN2A;PHB2;CHUK;CYP1B1;ESR1;EZH2;SIRT1;CCDC22;HDAC2;FOXA2;ID2;IL10;MIR21;MIR30C2;CD200;NFKBIA;FOXP3;PSMD10;RB1;BMP7;TFDP1;TWIST1;NLRC5;NR0B2;CAT;HAND2	3.48858	3.5002e-11
GOBP_REGULATION_OF_B_CELL_MEDIATED_IMMUNITY	CD226;CD55;TBX21;IL2;IL4;IL10;LTA;MLH1;MSH2;FOXP3;TREM2;PTPRC;BCL6;STAT6;BTK;TGFB1;TNF;C3	6.78023	3.73107e-11
GOBP_NEGATIVE_REGULATION_OF_BINDING	CDKN1A;LRRK2;CRMP1;ACE;AKT1;DKK1;HEY1;GSK3B;HDAC2;IFIT1;IL10;JUN;MIR148A;MIR27B;MAP2;NFKBIA;PPARA;MAPK3;MAPK8;PSEN1;B2M;BAX;ACTB;ROCK1;SLPI;ARHGAP28;HMGA2;ADIPOQ;HAND2	3.73891	3.84413e-11
GOBP_ARTERY_MORPHOGENESIS	EDN1;EDNRA;HEY1;HOXA13;HPGD;APOE;RBPJ;MIR143;MIR145;MIR205;MDK;NOTCH1;PDGFRB;DLL4;BMP4;TGFB2;TGFBR1;VEGFA;NRP1;HAND2	5.81196	3.94474e-11
GOBP_NEGATIVE_REGULATION_OF_TUMOR_NECROSIS_FACTOR_SUPERFAMILY_CYTOKINE_PRODUCTION	LILRB1;SIRPA;DICER1;PTPN22;IL37;CD274;GSTP1;IGF1;IL4;IL10;LGALS9;LTF;MIR132;MIR195;MIR204;FOXP3;ERRFI1;TREM2;AXL;MIR488;CX3CL1;TSPO;TLR4;TWIST1;ADIPOQ	5.81196	3.94474e-11
GOBP_MAMMARY_GLAND_EPITHELIUM_DEVELOPMENT	PHB2;CSF1;CSF1R;AKT1;ESR1;FGF2;FGFR2;GATA3;NR3C1;HIF1A;ID2;AR;AREG;PGR;WNT4;MED1;MAPK1;PRLR;BAX;CCND1;CCL11;SRC;BRCA2;STAT6;VDR	6.39735	3.97193e-11
GOBP_MORPHOGENESIS_OF_EMBRYONIC_EPITHELIUM	CTHRC1;ADM;CTNNB1;FGFR2;GATA3;GREM1;GDNF;HIF1A;AR;HES5;PAX2;WNT4;SALL4;BRD2;SDC4;SFRP1;SFRP2;BMP4;BMP7;SOX9;HNF1B;TGFB1;TGFB1I1;TGFB2;TWIST1;VEGFC;PAX8;CASP3;BCL10	3.88199	4.20326e-11
GOBP_SKIN_EPIDERMIS_DEVELOPMENT	CDH3;FST;HPSE;CTNNB1;DLX3;EGFR;ERCC2;FGFR2;DKK1;GATA6;INTU;HDAC1;HDAC2;RBPJ;INHBA;SMAD4;NGFR;NOTCH1;PDGFA;BCL2;RELA;SNAI1;SOX9;TGFB2;TNF;LGR5;ACVR1B	5.12935	4.21969e-11
GOBP_NEGATIVE_REGULATION_OF_LEUKOCYTE_MIGRATION	ADA;KLRC4-KLRK1;CD200R1;CYP19A1;DPP4;DUSP1;AKT1;KLRK1;PLCB1;GREM1;MIF;CD200;PTGER4;CCL2;CCL21;CCL25;CXCL12;C5;IL33;SLIT2	7.60094	4.30185e-11
GOBP_SULFUR_COMPOUND_BIOSYNTHETIC_PROCESS	UST;CTH;ANGPT1;GSTM1;GSTP1;ACACA;MIR21;MAT2A;NFE2L2;PPT1;SLC1A1;CHST3;TECR	3.96361	4.31844e-11
GOBP_NEGATIVE_REGULATION_OF_CANONICAL_WNT_SIGNALING_PATHWAY	CTHRC1;MAPK14;CTNNB1;EGR1;DKK1;FOXO1;FOXO3;GREM1;RBMS3;GLI1;GLI3;GSK3B;HDAC1;APOE;IGFBP1;IGFBP6;MIR29C;MDK;NOTCH1;SFRP1;SFRP2;SNAI2;SOX2;SOX9;AXIN1	4.05426	4.37699e-11
GOBP_REGULATION_OF_INTRINSIC_APOPTOTIC_SIGNALING_PATHWAY	BCL2L11;DNM1L;LRRK2;PARP1;ENO1;EPO;AKT1;SIRT1;DAPK2;HDAC1;HIF1A;MIR132;MIR17;MIR21;MIR27B;MDM2;MIF;MMP9;MUC1;MYC;NFE2L2;PIK3CB;TREM2;ACKR3;PTGS2;BAX;BCL2;BCL2L1;CXCL12;SFRP2;SNAI2;SNAI1;SOD1;SOD2;SRC;TP53;TPT1;XBP1;BECN1;CREB3L1;CD44;CD74	3.64705	4.45818e-11
GOBP_CARDIOCYTE_DIFFERENTIATION	SEMA3C;PDLIM5;AKAP13;ADRA1A;AGT;EDN1;EDNRA;EGFR;DKK1;MTOR;GATA6;GREM1;FOXP1;PDCD4;GPER1;IGF1;RBPJ;INHBA;ITGB1;MIR145;MIR195;MIR200B;MIR204;MIR21;SMAD4;NOTCH1;PDGFRA;PDGFRB;PPARA;MAPK1;MAPK3;RARB;RGS4;BMP4;BMP7;TGFB1;TGFB2;TWIST1;VCAM1;VEGFA;WT1;FZD7;WNT3A;HAND2;CDK1;CDC42	3.77506	5.02265e-11
GOBP_DENDRITIC_CELL_CHEMOTAXIS	CCR1;CCR5;CCR7;HMGB1;CXCR1;CXCR2;LGALS9;PIK3CG;CCL5;CCL19;CCL21;CCR2;CXCR4	15.3603	5.18037e-11
GOBP_T_CELL_MEDIATED_CYTOTOXICITY	LILRB1;CADM1;HLA-B;HLA-DRB1;HLA-G;HPRT1;IL7R;IL12B;IL12RB1;KLRC1;IL23A;B2M;PTPRC;PVR	8.02102	5.4179e-11
GOBP_REGULATION_OF_AUTOPHAGY	BCL2L11;DNM1L;NOD1;DEPP1;LRRK2;ADRA1A;DAPK1;DCN;AKT1;FOXO1;FOXO3;SIRT1;DAPK2;SH3BP4;MTOR;POLDIP2;PTPN22;GBA;GSK3B;HGF;HIF1A;HMGB1;IFNG;IL4;IL10;KDR;LEP;LEPR;MIRLET7B;MET;ATM;PIK3CA;PIK3CB;TREM2;MAPK3;MAPK8;BCL2;ROCK1;STAT3;TSPO;TP53;UCHL1;CASP3;BECN1;USP10	2.65071	5.54408e-11
GOBP_ANIMAL_ORGAN_REGENERATION	ADM;CPB2;ACE;EZH2;GLI1;GLI3;ANGPT2;HGF;APOA2;IHH;IL6;IL10;NOTCH1;PCNA;PGF;UGT1A1;MED1;AXL;CCND1;CXCL12;TNF;VTN;NR0B2;CLDN1;CDK1	6.61099	5.56255e-11
GOBP_REGULATION_OF_EPITHELIAL_TO_MESENCHYMAL_TRANSITION	COL1A1;CTNNB1;EPHA3;EZH2;MTOR;GATA3;GREM1;HDAC2;FOXA2;IL1B;IL6;MIR21;SMAD2;SMAD3;SMAD4;MDK;NOTCH1;PTEN;SFRP1;SFRP2;BMP4;BMP7;SNAI1;TGFB1;TGFB1I1;TGFB2;TGFB3;TGFBR1;TWIST1	4.72381	5.60922e-11
GOBP_ARTERY_DEVELOPMENT	EDN1;EDNRA;PLXND1;HEY1;GLI3;HOXA13;HPGD;APOE;RBPJ;LEP;LOX;LOXL1;MIR143;MIR145;MIR205;MDK;NGFR;NOTCH1;PDGFRB;DLL4;BMP4;TGFB2;TGFBR1;VEGFA;NRP1;ACVR2B;HAND2	4.72381	5.60922e-11
GOBP_CELL_MATURATION	CEBPA;CFTR;LRRK2;CTNNB1;EDN1;EDNRA;EPO;ERCC2;FOXO3;AKR1B1;GATA2;GATA3;GBA;GHRHR;ANG;HIF1A;IHH;IL15;KDR;HES5;MECP2;PAEP;PGR;PPARG;PPP2R1A;AXL;IL21;RB1;BCL2;REN;CCL19;CCL21;CX3CL1;BRCA2;BTK;C3;VEGFA	3.48684	5.67569e-11
GOBP_REGULATION_OF_CELL_PROJECTION_ASSEMBLY	YAP1;CCR7;DOCK11;EPHB2;F2RL1;MTOR;MSTN;INTU;GSK3B;ICAM1;USP17L2;RHOG;MIR214;TACSTD2;PIK3CA;CCL19;CCL21;ATG3;FSCN1;SRC;TGFB3;TGFBR1;NRP1;SLIT2;CDC42	3.17385	5.97963e-11
GOBP_ROOF_OF_MOUTH_DEVELOPMENT	TSHZ1;OSR2;DLX5;EPHB2;INTU;GLI3;INHBA;ITGB8;SMAD2;SMAD4;PDGFRA;BNC2;SNAI2;SNAI1;TCF21;TGFB2;TGFB3;TGFBR1;CLDN5;TWIST1;WNT7A;WNT3A;ACVR2B;HAND2	5.207	6.47741e-11
GOBP_NEGATIVE_REGULATION_OF_CYSTEINE_TYPE_ENDOPEPTIDASE_ACTIVITY	AKT1;HGF;NR4A1;BIRC2;BIRC3;BIRC5;IL9;AQP1;LTF;MIRLET7B;MIR17;MMP9;PAX2;PTGS2;RAF1;SFRP2;SRC;THBS1;TNF;VEGFA;RNF34;CD44	5.207	6.47741e-11
GOBP_ALPHA_BETA_T_CELL_PROLIFERATION	CD55;PTPN22;CD274;IL2;IL2RA;IL12B;IL15;IL18;LGALS9;FOXP3;IL23A;PTPRC;CCR2;TYK2;CARD11	8.5382	6.55718e-11
GOBP_POSITIVE_REGULATION_OF_MIRNA_TRANSCRIPTION	EGR1;ETS1;FGF2;FOXO3;FOS;GATA2;GATA3;NR3C1;HIF1A;IL10;JUN;SMAD3;SMAD4;MYB;MYC;NGFR;PPARG;PRL;RELA;STAT3;TERT;TGFB1;TGFB2;TNF;TP53;WT1	8.5382	6.55718e-11
GOBP_MONOCARBOXYLIC_ACID_TRANSPORT	ABCC4;ACE;AKR1C1;DRD2;EDN1;ANXA1;IL1A;IL1B;AQP9;LEP;LHCGR;MIR33A;MIF;NOS2;PLA2G2A;PTGS2;SSTR4;TNF;NR0B2;CASR;SLC16A6;CD36;PTGES	4.41505	6.57585e-11
GOBP_REGULATION_OF_PHOSPHATIDYLINOSITOL_3_KINASE_ACTIVITY	CCR7;FGF2;FLT1;LYN;PDGFRA;PDGFRB;CCL19;CCL21;SRC;TEK;TGFB1;CD19;CDC42	7.37044	6.69917e-11
GOBP_POSITIVE_REGULATION_OF_MACROPHAGE_CYTOKINE_PRODUCTION	NOD1;LILRB1;SIRT1;HLA-G;TLR3;TLR4;CD36;CD74	17.5887	7.13625e-11
GOBP_POSITIVE_REGULATION_OF_DEVELOPMENTAL_GROWTH	YAP1;AGR2;CRABP2;CREB1;MAPK14;CSF1;ARX;DRD2;EDN1;MEGF8;AKT1;FGF2;FGF9;FGFR2;PLCB1;NEDD4L;FN1;LPAR3;GATA6;GH1;GHRH;GHRHR;GLI1;IGF1;RBPJ;IL7;INSR;L1CAM;LEP;LIMK1;MIR204;NGF;NOTCH1;BCL2;BDNF;CXCL12;SOX15;SYT1;VEGFA;EZR;WT1;ZP3;CXCR4;NRP1;WNT3A;CDK1	3.649	7.22839e-11
GOBP_POSITIVE_REGULATION_OF_PEPTIDYL_SERINE_PHOSPHORYLATION	CSF3;EGFR;AKT1;ANGPT1;IFNA1;IFNA13;IFNG;IL6;IL11;LIF;MIF;NGF;NOS1;NTF3;NTF4;NTRK2;NTRK3;PAK1;PIK3CA;PTGS2;RAF1;BCL2;BDNF;SFRP2;BRAF;TGFB1;TNF;TXN;UCN;VEGFA;AXIN1;BCAR3;WNT3A;CD44	4.66073	7.4059e-11
GOBP_AMINOGLYCAN_BIOSYNTHETIC_PROCESS	UST;EGF;ANGPT1;HAS1;IL1B;NFKB1;PDGFRB;TGFB1;CHST3;HS3ST3B1	5.59153	7.80272e-11
GOBP_PERIPHERAL_NERVOUS_SYSTEM_DEVELOPMENT	NDRG1;ERBB2;AKT1;DICER1;GDNF;ILK;NGF;NTF3;NTF4;NTRK2;BDNF;SOD1;RUNX1;RUNX3;ARTN;CLDN1;HAND2;CDK1	5.59153	7.80272e-11
GOBP_POSITIVE_REGULATION_OF_CD4_POSITIVE_ALPHA_BETA_T_CELL_DIFFERENTIATION	ANXA1;HLA-DRB1;IFNG;IL12B;IL12RB1;IL18;LGALS9;MIR21;MYB;FOXP3;IL23A;CCL19;CD86	11.1865	8.03579e-11
GOBP_FOAM_CELL_DIFFERENTIATION	CETP;CRP;CSF1;CSF2;AGT;AGTR1;IL18;ITGAV;ITGB3;NFKB1;NFKBIA;PF4;PLA2G2A;PPARA;PPARG;TGFB1;ADIPOQ;CD36	10.0387	8.13358e-11
GOBP_UNSATURATED_FATTY_ACID_BIOSYNTHETIC_PROCESS	EDN1;SIRT1;ALOX15;HPGDS;ANXA1;IL1B;MIR132;MIR204;MIF;PTGS2;AKR1C3;PTGES;CD74	7.75347	8.6192e-11
GOBP_RESPONSE_TO_MONOSACCHARIDE	CDKN1B;TXNIP;CFTR;UCN3;CPB2;CCN2;ACE;EGR1;FOXO3;PLCB1;GHRHR;ANGPT2;GPER1;HIF1A;HLA-DRB1;FOXA2;APOA2;ICAM1;IGF1R;IL1A;ITGA2;LEP;SMAD2;SMAD4;PAX2;SERPINF1;PIK3CA;TREM2;PTGS2;RAF1;SOD2;HNF1B;THBS1;TNF;XBP1;CASP3;NR0B2;CASR;CAT;IRS2;ACVR2B;ADIPOQ	3.27148	8.73774e-11
GOBP_POSITIVE_REGULATION_OF_WNT_SIGNALING_PATHWAY	CDH3;YAP1;LRRK2;COL1A1;DLX5;EGF;EGFR;FGF2;FGF9;FGFR2;DKK1;RBPJ;ILK;MIR145;SMAD3;NFKB1;SULF2;SFRP1;SFRP2;WNK1;SRC;TERT;TGFB1;TLR2;LGR5;WNT3A	3.9373	8.76293e-11
GOBP_PRODUCTION_OF_MOLECULAR_MEDIATOR_INVOLVED_IN_INFLAMMATORY_RESPONSE	SIRPA;MAPK14;EPHB2;EZH2;F2;PDCD4;HIF1A;IL6;IL17A;LEP;LYN;MIR17;MIR21;NOS2;MIR378A;SERPINE1;IL17D;TREM2;PPARA;STAT3;BTK;TLR4;TNF;IL1R2;CD36	4.77328	8.80596e-11
GOBP_POST_EMBRYONIC_DEVELOPMENT	BCL2L11;SEMA3C;CYP1A2;ERCC1;ERCC2;FBN1;FGFR2;MTOR;GATA3;KDR;SMAD2;MECP2;ATM;PSEN1;BAX;BCL2;SELENOP;BMP4;SOD2;TGFBR1;VEGFA;ACVR2B	5.12289	8.81453e-11
GOBP_PROTEASOMAL_PROTEIN_CATABOLIC_PROCESS	CEBPA;LRRK2;CTNNB1;AKT1;NEDD4L;SIRT1;RNF19A;GBA;GSK3B;TBX21;BIRC2;IFI27;APOE;MDM2;NFE2L2;PLK1;TREM2;PSEN1;PSMD2;PSMD10;SKP2;SMARCC1;UCHL1;XBP1;BAG6;RNF34;AXIN1;IL33;MTA1;CLOCK	2.26734	8.86775e-11
GOBP_RESPONSE_TO_OSMOTIC_STRESS	EPO;AKR1B1;MTOR;AQP1;AQP5;ITGA2;ERRFI1;MAP2K7;PTGS2;BAX;SLC2A1;SLC2A4;SST;TSPO;TLR3;TNF;TP53;CASP3;CLDN1	5.29276	9.89719e-11
GOBP_CELLULAR_RESPONSE_TO_STEROID_HORMONE_STIMULUS	BCL2L11;YAP1;CARM1;PHB2;PARP1;CYP1B1;ACE;DDX5;EDN1;ESR1;ESR2;ESRRB;FKBP4;FOXO3;SIRT1;MSTN;GHRHR;GJB2;FOXP1;GPER1;NR3C1;ANXA1;HDAC1;IGF1R;AQP1;AR;ARG1;NR3C2;PAK1;SERPINF1;PGR;ERRFI1;PPARA;UGT1A1;MED1;TRERF1;VPS11;RXRA;SFRP1;SKP2;BMP4;BMP7;SRC;SRD5A1;BRCA1;SSTR4;STC1;KLF9;TCF21;NR2C1;ZFP36;ARID1A;AKR1C3;CLOCK;NCOR1	3.25095	1.04586e-10
GOBP_NEGATIVE_REGULATION_OF_T_CELL_DIFFERENTIATION	CTLA4;ERBB2;GLI3;TBX21;ANXA1;HMGB1;IHH;IL2;IL4;MIR21;MDK;FOXP3;BCL6;BMP4;RUNX1;RUNX3;CD74	8.22178	1.07008e-10
GOBP_REGULATION_OF_BONE_REMODELING	CSF1R;CSK;S1PR1;FSHB;GREM1;IAPP;IL6;ITGB3;LEP;LEPR;MDK;TNFRSF11B;PRKCA;SFRP1;SPP1;SRC;CALCA;DCSTAMP	8.22178	1.07008e-10
GOBP_REGULATION_OF_NEUTROPHIL_MIGRATION	DNM1L;OLFM4;CCR7;DPP4;EDN1;DAPK2;IL1A;IL1R1;CXCL8;CXCR2;RHOG;MDK;IL23A;CCL19;CCL21;SLIT2;CD74	8.22178	1.07008e-10
GOBP_RESPONSE_TO_ESTRADIOL	BCL2L11;CDKN1B;TXNIP;COL1A1;CCN2;CTNNB1;CYP1B1;CYP19A1;DNMT3A;AGT;EGFR;ESR1;ESR2;EZH2;GH1;GJB2;GPER1;GPX4;ANXA1;HPGD;IGF1R;IHH;IL10;ITGA2;AREG;LEP;MMP2;OGG1;OXTR;PCNA;PDGFA;PDGFRB;UGT1A1;PTGFR;PTGS2;CCND1;SFRP1;SLC6A4;BMP7;SRD5A1;SSTR1;STAT3;TACR1;NR2F2;TGFB1;UCN;WNT7A;CASP3;CAT	4.31223	1.09783e-10
GOBP_EPITHELIAL_TUBE_FORMATION	CTHRC1;ADM;CTNNB1;EGF;FGF2;FGFR2;GATA3;GREM1;GDNF;HIF1A;HES5;PAX2;PIK3CD;WNT4;SALL4;BRD2;SDC4;SFRP1;SFRP2;BMP4;BMP7;SOX9;HNF1B;TGFB1;TGFB2;TWIST1;PAX8;CASP3;BCL10	3.98755	1.12512e-10
GOBP_PROTEIN_TARGETING	CIB1;LRRK2;ERBB2;HSPA4;HSPD1;ITGAM;USP17L2;LHCGR;VPS11;ATG3;SLC1A1;TSPO;YWHAZ;BAG6;BECN1	2.68982	1.15272e-10
GOBP_REGULATION_OF_IMMUNOGLOBULIN_PRODUCTION	PHB2;FCRL3;EPHB2;TBX21;IL2;IL4;IL6;IL10;IL13;MLH1;MSH2;FOXP3;PTPRC;IL21;BCL6;STAT6;BTK;TGFB1;TNF;XBP1;IL33;CD86;CD40LG	5.71384	1.16236e-10
GOBP_PROTEIN_LOCALIZATION_TO_PLASMA_MEMBRANE	CIB1;AGR2;CSK;DPP6;EGFR;EPHA3;EPHB2;AKT1;NECTIN3;GPER1;ANK1;IFNG;AR;ITGB1;RHOG;LGALS3;MMP14;TREM2;BCL2L1;ACTB;ROCK1;GORASP1;BSG;TGFB1;TNF;TNFRSF1A;EZR;SKAP1;SQSTM1;WNT3A;ADIPOQ;CDH1	2.82184	1.18429e-10
GOBP_REGULATION_OF_PHOSPHOLIPASE_ACTIVITY	RASGRP1;PHB2;ADRA1A;AGT;AGTR1;EDNRA;EGFR;ESR1;FGF2;FGFR2;FLT1;ANG;ANXA1;CCN1;P2RY6;PDGFRA;PDGFRB;PPT1;CCL5;SELE;LPAR2;CD86	6.29637	1.20241e-10
GOBP_NON_CANONICAL_WNT_SIGNALING_PATHWAY	CTHRC1;DKK1;WNT4;SFRP1;SFRP2;WNT7A;FZD7;CDC42	5.98003	1.2048e-10
GOBP_PLATELET_AGGREGATION	MYL9;FGA;FN1;IL6;ILK;ITGB3;LYN;PDGFRA;PIK3CB;PIK3CG;PRKCA;ACTB;ACTN1;WNT3A	5.98003	1.2048e-10
GOBP_T_HELPER_17_TYPE_IMMUNE_RESPONSE	EPHB2;TBX21;IL2;IL4;IL6;IL12B;IL12RB1;MIR21;NOTCH1;FOXP3;IL23A;STAT3;TYK2	8.80733	1.27008e-10
GOBP_POSITIVE_REGULATION_OF_LIPID_TRANSPORT	CETP;CRH;CYP19A1;EDN1;SIRT1;ANXA2;APOE;IL1A;IL1B;FASLG;MIF;NFKBIA;TREM2;PON1;PPARG;RETN;RXRA;SPP1;SSTR4;ADIPOQ;LIPG;PTGES	5.20293	1.35389e-10
GOBP_REGULATION_OF_CELL_SIZE	SEMA3C;CLCN3;CRABP2;CREB1;DPYSL2;EDN1;MEGF8;FN1;LPAR3;MTOR;GSK3B;APOE;IL7R;AQP1;L1CAM;LIMK1;MAP2;NGF;PTEN;SEMA6A;BDNF;CXCL12;SPP1;UCN;VAV1;VEGFA;EZR;NRP1;WNT3A;SEMA3E;CDH1	3.43475	1.35692e-10
GOBP_RENAL_TUBULE_DEVELOPMENT	YAP1;CTNNB1;AGT;AGTR2;FGF1;FGF2;GATA3;GREM1;GDNF;GLI3;HOXA11;AQP1;ILK;HES5;LIF;TACSTD2;SMAD4;MYC;NOTCH1;PAX2;WNT4;BCL2;BMP4;SOX9;HNF1B;TCF21;VEGFA;WT1;PAX8;LGR5;PROM1;HS3ST3B1	4.82718	1.3792e-10
GOBP_NEGATIVE_REGULATION_OF_OSTEOCLAST_DIFFERENTIATION	LILRB1;CTNNB1;FBN1;IAPP;IL4;LTF;TNFRSF11B;SFRP1;TLR3;TLR4	11.971	1.37954e-10
GOBP_PROSTANOID_BIOSYNTHETIC_PROCESS	EDN1;SIRT1;HPGDS;ANXA1;IL1B;MIR132;MIR204;MIF;PTGS2;AKR1C3;PTGES;CD74	11.971	1.37954e-10
GOBP_NEGATIVE_REGULATION_OF_CELL_JUNCTION_ASSEMBLY	ACE;DKK1;IL1B;MIR142;MMP14;PTEN;ROCK1;SRC;THBS1;TLR2;TNF	11.971	1.37954e-10
GOBP_POSITIVE_REGULATION_OF_FATTY_ACID_METABOLIC_PROCESS	PPARGC1A;ANXA1;IL1B;PPARA;PPARG;PTGS2;TWIST1;IRS2;ADIPOQ;CD74	9.56039	1.42264e-10
GOBP_EMBRYONIC_SKELETAL_SYSTEM_DEVELOPMENT	OSR2;COL1A1;CTNNB1;EDNRA;MEGF8;FGF9;FGFR2;GLI3;HOXA11;HOXB4;IHH;SMAD2;SMAD3;MMP14;PDGFRA;SULF2;BMP4;BMP7;ZEB1;TGFB3;TGFBR1;TWIST1;HAND2	4.14679	1.43742e-10
GOBP_MAST_CELL_MEDIATED_IMMUNITY	RASGRP1;GATA2;IL4;IL13;LGALS9;LYN;PIK3CD;PIK3CG;BTK	6.95008	1.5674e-10
GOBP_LOCOMOTORY_BEHAVIOR	CLCN3;LRRK2;CRH;DPP4;DRD2;EGR1;MTOR;GDNF;HPGDS;FOXA2;HPRT1;ID2;APOE;IDO1;MECP2;NTF4;PPT1;ANKH;PTEN;CXCL12;SELENOP;SLC1A1;SNCG;SOD1;SOD2;TRH;UCHL1;MTA1;NCOR1	3.30309	1.59158e-10
GOBP_NATURAL_KILLER_CELL_MEDIATED_IMMUNITY	KLRC4-KLRK1;RASGRP1;CD226;LILRB1;CRK;FCGR3A;KLRK1;CADM1;NCR3;HLA-B;HLA-G;IL12B;IL18;KIR2DL4;KIR3DL1;KLRC1;LEP;LGALS9;SH2D1A;PVR;IL21;VAV1;ULBP3;ULBP2	5.60206	1.63073e-10
GOBP_HOMOPHILIC_CELL_ADHESION_VIA_PLASMA_MEMBRANE_ADHESION_MOLECULES	CDH3;CDH15;CADM1;CADM2;NECTIN3;ITGB1;L1CAM;PIK3CB;ROBO4;PVR;NECTIN1;BSG;TRO;NECTIN4;CDH1	3.53551	1.63089e-10
GOBP_ANION_TRANSMEMBRANE_TRANSPORT	ABCC4;CFTR;CLCN3;ANO4;CLDN4;AGT;SLC7A8;GJA1;ITGB1;ARG1;ANKH;PSEN1;RGS4;SLC1A1;SLC20A1;TNF;SLC38A1;CASR;SFXN1	2.88377	1.68311e-10
GOBP_POSITIVE_REGULATION_OF_TYPE_I_INTERFERON_PRODUCTION	CHUK;PTPN22;HSPD1;MMP12;TLR2;TLR3;TLR4;CD14	6.50791	1.69829e-10
GOBP_BONE_RESORPTION	CSF1R;CSK;CTNNB1;S1PR1;FSHB;IAPP;IHH;IL6;IL7;ITGB3;TNFRSF11B;PRKCA;SPP1;SRC;CALCA;DCSTAMP	6.50791	1.69829e-10
GOBP_POSITIVE_REGULATION_OF_HORMONE_SECRETION	CFTR;UCN3;CREB1;CRH;CYP19A1;DRD2;EDN1;FGA;GHRH;GHRHR;GPER1;HIF1A;HLA-DRB1;INHA;INHBA;KISS1;LEP;SMAD4;PPARG;RETN;PSMD9;SPP1;TACR1;TRH;UCN;NR0B2;CASR;IRS2	4.21409	1.80863e-10
GOBP_RESPONSE_TO_ETHANOL	CNR1;CLDN3;CLDN7;CRHR1;CSF3;DNMT3A;DRD2;FGFR2;FOS;GATA3;MSTN;GNRH1;HDAC2;HPGD;BIRC2;IGF1R;IL2;IL13;LEP;MAOB;NTRK3;OGG1;OPRM1;PPARA;UGT1A1;CCND1;RGS4;SLC2A4;SOD1;SOD2;TACR1;CLDN5;TNF;VCAM1;NR0B2;CAT;CLDN1;CD14;ADIPOQ;CDK1	4.10214	1.82787e-10
GOBP_OLIGODENDROCYTE_DIFFERENTIATION	CSK;IL34;CTNNB1;ERBB2;ERCC2;MTOR;TNFRSF21;GLI3;HDAC1;HDAC2;HES5;LYN;MDK;NOTCH1;NTRK2;PTEN;PTN;SOX9;TLR2;TNFRSF1B;VTN;CXCR4;IL33	4.75712	1.83299e-10
GOBP_ACTIN_POLYMERIZATION_OR_DEPOLYMERIZATION	CFL1;CCR7;CSF3;AIF1;F2RL1;ALOX15;MTOR;LMOD1;ANG;TMOD3;HCK;MIR214;PIK3CA;RASA1;CCL11;CCL21;CXCL12;ARHGAP28;SLIT2	3.28128	1.90948e-10
GOBP_DETOXIFICATION	ABCB6;ALB;GPX3;GPX4;GSTM1;GSTM2;GSTP1;GSTT1;HP;APOE;GSTK1;MIR21;MPO;NFE2L2;NOS3;PTGS2;MIR451A;BMP7;SOD1;SOD2;TXN;CAT;CD36;PTGES	3.71991	2.02451e-10
GOBP_NEGATIVE_REGULATION_OF_ALPHA_BETA_T_CELL_ACTIVATION	LILRB1;GLI3;CD274;TBX21;ANXA1;HMGB1;IHH;IL2;IL4;LGALS9;FOXP3;BCL6;RUNX1;RUNX3	8.45484	2.09897e-10
GOBP_POSITIVE_REGULATION_OF_B_CELL_ACTIVATION	ADA;CDKN1A;FCRL3;EPHB2;TBX21;IL2;IL4;IL6;IL7;IL10;IL13;MIF;MLH1;MMP14;MSH2;PRLR;PTPRC;IL21;BCL2;BCL6;STAT6;BTK;TGFB1;TLR4;XBP1;CARD11;IRS2;WNT3A;CD74	3.79264	2.13392e-10
GOBP_HUMORAL_IMMUNE_RESPONSE_MEDIATED_BY_CIRCULATING_IMMUNOGLOBULIN	CD55;CFI;LTA;MBL2;TREM2;PTPRC;SERPING1;TNF;C1R;C3;C5;C9;ZP3	4.42441	2.16372e-10
GOBP_NEGATIVE_REGULATION_OF_ION_TRANSPORT	LILRB2;LILRB1;CNR1;CRHR1;ADRA2B;ACE;DRD2;EPHB2;EPO;NEDD4L;REM1;GSTM2;LEP;MIR200C;MIR33A;MIR34A;MAOB;MMP9;NOS1;NOS3;PTGS2;BCL2;RGS4;WNK1;STC1;TNF;TRH;TWIST1;VIP	3.56319	2.16508e-10
GOBP_STRIATED_MUSCLE_CONTRACTION	ABCC9;ADRA1A;CCN2;NEDD4L;MTOR;GJA1;GSTM2;NR4A1;KCNQ1;MIR200C;NOS1;PIK3CA;PIK3CG;STC1;TNF;UCN;CXCR4	3.43184	2.20032e-10
GOBP_POSITIVE_REGULATION_OF_VASCULAR_ENDOTHELIAL_GROWTH_FACTOR_PRODUCTION	HPSE;CYP1B1;HIF1A;IL1A;IL1B;IL6;ARNT;MIR132;SULF2;PTGS2;BRCA1;TGFB1;C3;C5	12.9971	2.27682e-10
GOBP_SODIUM_ION_TRANSPORT	SCN11A;DRD2;EDN1;EDNRA;AKT1;NEDD4L;KCNQ1;NOS1;NOS3;WNK1;SLC6A4;SLC20A1;UTRN;ACTN4;SLC38A1	2.92083	2.32786e-10
GOBP_PEPTIDE_ANTIGEN_ASSEMBLY_WITH_MHC_CLASS_II_PROTEIN_COMPLEX	HLA-DPB1;HLA-DQB1;HLA-DRB1;B2M	31.6488	2.3502e-10
GOBP_REGULATION_OF_DEFENSE_RESPONSE_TO_VIRUS	LILRB1;IL27;PTPN22;IFIT1;IL1B;IL4;IL12B;IL12RB1;IL15;USP17L2;MMP12;FOXP3;HERC5;IL23A;HTRA1	5.73014	2.42804e-10
GOBP_REGULATION_OF_DENDRITIC_CELL_ANTIGEN_PROCESSING_AND_PRESENTATION	NOD1;CCR7;CCL19;CCL21;THBS1;CD68;CD74	105.513	2.4349e-10
GOBP_ACTIVATION_OF_INNATE_IMMUNE_RESPONSE	KLRC4-KLRK1;KLRK1;HCK;HMGB1;LYN;MBL2;PAK1;SRC;TLR4;TYROBP	6.3453	2.4934e-10
GOBP_RESPONSE_TO_ESTROGEN	SRA1;EPO;ESR1;GATA3;GATA6;GBA;MSTN;GHRHR;GLI3;HOXA10;HOXA11;APOA2;AR;MME;MMP2;MMP14;TNFRSF11B;PDGFRB;CCND1;SFRP1;SRD5A1;BRCA1;TGFB3;WNT7A	6.01008	2.51019e-10
GOBP_CELLULAR_RESPONSE_TO_LIPOPROTEIN_PARTICLE_STIMULUS	AKT1;APOE;ITGB1;TREM2;PPARG;ADAM17;TLR4;CASR;CD36;CD68	10.0084	2.64021e-10
GOBP_APOPTOTIC_MITOCHONDRIAL_CHANGES	BCL2L11;DNM1L;AKT1;GPER1;GSK3B;HGF;HSPD1;IGF1;MIR17;MIR29C;MMP9;MAPK8;PSMD10;BAX;BCL2;BCL2L1;ATG3;SOD2;TP53;TNFSF10	4.51835	2.64332e-10
GOBP_RESPONSE_TO_VITAMIN	POSTN;COL1A1;CYP1A1;CYP26A1;DNMT3A;EPO;IGF1R;IL1A;IL15;CXCL10;ITGA2;ARG1;LEP;OGG1;MED1;PTGS2;CCND1;RXRA;SFRP1;BMP7;SNAI2;SOD2;SPP1;STC1;TSPO;VDR;CASR;CAT;STC2;BECN1	5.19865	2.831e-10
GOBP_FOCAL_ADHESION_ASSEMBLY	EPHA3;POLDIP2;GREM1;ITGA2;KDR;SMAD3;MMP14;WNT4;PTEN;BCL2;ROCK1;SDC4;SFRP1;SRC;TEK;THBS1;THY1;VEGFA;ACTN1;NRP1	5.19865	2.831e-10
GOBP_RENAL_SYSTEM_PROCESS	ADM;CLDN4;ADRA1A;ACE;DRD2;AGT;AGTR1;AGTR2;EDN1;EDNRA;F2R;F2RL1;AKR1B1;HSD11B2;AQP1;AQP2;KCNQ1;SULF2;BCL2;REN;BMP4;STC1;TACR1;TRPV1;AKR1C3;HYAL2;ADIPOQ	4.12032	2.94179e-10
GOBP_CARBOHYDRATE_TRANSPORT	MAPK14;ACE;EDN1;EDNRA;AKT1;GH1;IGF1;IL1B;AQP1;AQP2;INSR;AQP9;LEP;MIR143;NFE2L2;ENPP1;PRKCB;SLC2A1;SLC2A3;SLC2A4;BRAF;TERT;TNF;C3;EZR;IRS2;PEA15;ADIPOQ	3.65567	3.08308e-10
GOBP_NEPHRON_MORPHOGENESIS	CTNNB1;AGT;AGTR2;FGF1;FGF2;GATA3;GREM1;GDNF;GLI3;HOXA11;ILK;HES5;LIF;TACSTD2;SMAD4;MYC;PAX2;PDGFRB;WNT4;BCL2;BMP4;BMP7;SOX9;HNF1B;TCF21;VEGFA;WT1;PAX8;HS3ST3B1	5.39106	3.14681e-10
GOBP_MESONEPHROS_DEVELOPMENT	OSR2;CTNNB1;AGT;AGTR2;FGF1;FGF2;FGFR2;GATA3;GREM1;GDNF;GLI3;HOXA11;ILK;TACSTD2;EPCAM;SMAD2;SMAD3;SMAD4;MYC;PAX2;WNT4;RARB;BCL2;REN;SDC1;SDC4;SFRP1;BMP4;BMP7;SOX9;HNF1B;TCF21;VEGFA;WT1;PAX8;CAT;SLIT2;HS3ST3B1	4.62293	3.19523e-10
GOBP_HEART_GROWTH	YAP1;PDLIM5;AKAP13;MAPK14;ADRA1A;AGT;DUSP6;S1PR1;EDN1;FGF2;FGF9;FGFR2;GATA6;FOXP1;GLI1;IGF1;RBPJ;MIR195;MIR200B;MIR204;NOTCH1;PPARA;PTEN;RGS4;TGFB2;TGFBR1;WT1;RUNX1;CDK1	4.62293	3.19523e-10
GOBP_REGULATION_OF_LIPASE_ACTIVITY	RASGRP1;PHB2;ADRA1A;AGT;AGTR1;EDNRA;EGFR;ESR1;FGF2;FGFR2;FLT1;ANG;ANXA1;APOA2;CCN1;RHOC;P2RY6;PDGFRA;PDGFRB;PPT1;CCL5;SELE;LPAR2;CD86;HDAC9	4.95083	3.35534e-10
GOBP_CARDIAC_MUSCLE_TISSUE_MORPHOGENESIS	S1PR1;EDNRA;FGFR2;ANKRD1;RBPJ;MIR195;SMAD4;NOTCH1;DLL4;MED1;TGFB1;TGFB2;TGFBR1	6.57232	3.50842e-10
GOBP_NEGATIVE_REGULATION_OF_INTERLEUKIN_6_PRODUCTION	CD200R1;SIRPA;CSK;PTPN22;GBA;IL37;HGF;IL10;MIR132;MIR195;MIR204;CD200;FOXP3;CX3CL1;TLR4;TNF	5.87661	3.58269e-10
GOBP_POSITIVE_REGULATION_OF_DNA_METABOLIC_PROCESS	PPARGC1A;BRD8;PARP1;CTNNB1;CYP1B1;EGF;EGFR;ERCC1;ERCC2;AKT1;ERCC6;FGF2;FOXM1;SIRT1;GREM1;GLI1;DNMT3L;TBX21;H2AX;HGF;HMGB1;IGF1R;IL2;IL4;IL6;MAS1;MECP2;MLH1;MSH2;MYC;ATM;PCNA;PDGFRB;MAPK1;MAPK3;MAP2K7;PTPRC;BAX;ACTB;SMOC2;SMARCC1;SRC;BRCA1;STAT6;TERF1;TGFB1;TNF;UCN;WT1;XRCC1;STN1;ARID1A;BCAR3;CDK1	2.70134	3.59439e-10
GOBP_MITOCHONDRION_ORGANIZATION	BCL2L11;DNM1L;CEBPA;PPARGC1A;PHB2;LRRK2;PARP1;DCN;EDN1;EDNRA;AKT1;POLDIP2;GBA;GPER1;GSK3B;HGF;HIF1A;HSPA4;HSPD1;IAPP;IGF1;KDR;MIR17;MIR29C;MMP9;NOS3;TREM2;PPARG;ATAD3A;VPS11;MAPK8;PSMD10;BAX;BCL2;BCL2L1;ATG3;SOD2;TERT;TSPO;TP53;MAP1LC3B;BECN1;TNFSF10;SQSTM1	2.18441	3.66286e-10
GOBP_REGULATION_OF_NEURON_DIFFERENTIATION	LRRK2;ADRA2B;DPYSL2;EPO;FGF2;ZHX2;DKK1;FOXO3;HEY1;GATA2;GLI3;GSK3B;ID2;ITGB1;HES5;NGF;NOTCH1;NTF3;NTF4;MED1;B2M;BCL2;BCL6;ROCK1;BDNF;CXCL12;SFRP1;SFRP2;BMP4;SLC6A4;BMP7;SOX2;SOX9;TCF3;ZEB1;NCOA1;WNT3A	3.25357	3.70086e-10
GOBP_NEGATIVE_REGULATION_OF_CELLULAR_RESPONSE_TO_GROWTH_FACTOR_STIMULUS	PDCD6;TOB1;CXCL13;DCN;AGT;AGTR2;FBN1;FGF2;DKK1;GATA3;GREM1;IL4;IL12B;MIR17;MIR20A;MIR200C;MIR342;NGFR;NOTCH1;PIK3CB;WNT4;PPARG;SULF2;HTRA1;MIR503;SEMA6A;SFRP1;SFRP2;THBS1;CREB3L1;SLIT2;GDF3	4.188	3.71149e-10
GOBP_POSITIVE_REGULATION_OF_PROTEIN_BINDING	CTHRC1;LRRK2;CSF3;ACE;PLXND1;POLDIP2;GSK3B;ANXA2;APOE;MMP9;PSEN1;B2M;BDNF;BMP4;TERT;CLDN5;VTN;NRP1;WNT3A	5.1089	3.85038e-10
GOBP_KERATINOCYTE_DIFFERENTIATION	CDH3;YAP1;TXNIP;EZH2;INTU;ANXA1;RBPJ;IL1A;NOTCH1;ERRFI1;MED1;MAP2K1;ROCK1;VDR;ZFP36;CASP3;AKR1C3	3.47942	3.92815e-10
GOBP_PEPTIDE_METABOLIC_PROCESS	MIR543;TOB1;EIF1;KHDRBS1;CPM;CYP1B1;DAPK1;ACE;DIO2;DPP4;EIF4EBP1;ELAVL1;ERBB2;AKT1;FOXO3;MTOR;HPGDS;ANG;GPX4;GSTM1;GSTM2;GSTP1;GSTT1;IFNG;IFNGR1;IGF1;APOE;IL6;EIF3E;ITGA2;GSTK1;LGALS4;MIR100;MIR10B;MIR132;MIR145;MIR148A;MIR17;MIR181C;MIR20A;MIR200B;MIR200C;MIR204;MIR205;MIR21;MIR210;MIR27B;MIR29C;MIR31;MLH1;MME;MIR135B;MSI1;NFE2L2;YBX1;NTRK2;MIR378A;QRSL1;PSEN1;MIR503;RELA;REN;ROCK1;MIR483;CCL5;S…	1.84472	3.93462e-10
GOBP_T_CELL_HOMEOSTASIS	BCL2L11;AKT1;FAS;IL2;IL2RA;IL7R;LGALS9;FOXP3;BAX;BCL2;CASP3	8.72863	4.08276e-10
GOBP_ACTIVATED_T_CELL_PROLIFERATION	EPO;CADM1;CD274;HMGB1;IGF1;IL2;IL2RA;IL12B;IL12RB1;IL18;IDO1;ARG1;LGALS9;MIR181C;MIR21;FOXP3;IL23A;CASP3	7.39909	4.24605e-10
GOBP_STRIATED_MUSCLE_CELL_PROLIFERATION	YAP1;MAPK14;FGF2;FGF9;FGFR2;FOS;GATA6;MSTN;GLI1;ANGPT1;HGF;RBPJ;MIR200B;MIR204;NOTCH1;PTEN;SRC;TGFB2;TGFBR1;RUNX1;CDK1	5.29046	4.33008e-10
GOBP_REGULATION_OF_SODIUM_ION_TRANSPORT	DRD2;AKT1;NEDD4L;KCNQ1;NOS1;NOS3;WNK1;UTRN;ACTN4	4.87214	4.49412e-10
GOBP_SYNAPSE_ASSEMBLY	PDLIM5;DRD2;EPHB2;DKK1;PLXND1;IL1RAP;MECP2;NTRK2;NTRK3;OXTR;PTEN;PTPRD;NECTIN1;BDNF;TLR2;WNT7A;WNT3A;CDH1	3.33346	4.68008e-10
GOBP_DENDRITIC_CELL_MIGRATION	CCR1;CCR5;CCR7;HMGB1;CXCR1;CXCR2;LGALS9;PIK3CG;CCL5;CCL19;CCL21;CCR2;CXCR4;CDC42	10.5622	4.80293e-10
GOBP_POSITIVE_REGULATION_OF_EPITHELIAL_TO_MESENCHYMAL_TRANSITION	COL1A1;CTNNB1;EZH2;MTOR;HDAC2;IL1B;IL6;MIR21;SMAD2;SMAD3;SMAD4;MDK;NOTCH1;BMP4;BMP7;SNAI1;TGFB1;TGFB1I1;TGFB2;TGFB3;TGFBR1;TWIST1	6.83925	4.84475e-10
GOBP_MAST_CELL_ACTIVATION	RASGRP1;NDRG1;CD226;CNR1;GATA2;IL4;IL13;LGALS9;LYN;ENPP3;PIK3CD;PIK3CG;BTK;TSLP	5.74793	5.0738e-10
GOBP_MORPHOGENESIS_OF_AN_EPITHELIAL_SHEET	HBEGF;MEGF8;MTOR;HOXB4;CCN1;ITGA5;ITGB1;RHOC;MMP12;NOTCH1;DLL4;PTEN;BMP7;ADAM17;WNT7A;CD44	6.3995	5.16873e-10
GOBP_RESPONSE_TO_FUNGUS	CRK;CX3CR1;DEFB4A;IL17A;ARG1;LTF;MPO;RARRES2;BTK;TLR4;BCL10	6.0431	5.23066e-10
GOBP_POSITIVE_REGULATION_OF_INTRACELLULAR_TRANSPORT	CIB1;KHDRBS1;MAPK14;ERBB2;GLI3;GSK3B;ANXA2;IFNG;IL1B;ITGAM;LEP;SMAD3;MAP2;VPS11;MAPK8;PSEN1;PTGS2;TGFB1;EZR;HYAL2;HDAC3;CDK1;CDH1	3.2106	5.28219e-10
GOBP_REGULATION_OF_HUMORAL_IMMUNE_RESPONSE	CXCL13;PHB2;CCR7;CD55;GATA6;IL1B;IL17A;LTA;TREM2;PTPRC;SERPING1;TNF;C3;ZP3	7.82819	5.44949e-10
GOBP_VESICLE_MEDIATED_TRANSPORT_IN_SYNAPSE	PRRT2;CLCN3;LRRK2;CNR1;ADRA1A;CTNNB1;DRD2;GSK3B;ITGB3;PRKCB;PSEN1;PTEN;ACTB;ROCK1;SLC2A4;SNCG;BRAF;SYP;SYT1;WNT7A;WNT3A	3.10579	5.70323e-10
GOBP_REGULATION_OF_BONE_MINERALIZATION	OSR2;CCR1;S1PR1;AHSG;GREM1;HIF1A;CCN1;LTF;SMAD3;ENPP1;WNT4;ANKH;PTN;RXRA;BMP4;BMP7;BMPR1B;SOX9;TGFB1;TGFB3;TWIST1;VDR;ACVR2B	5.19415	5.92226e-10
GOBP_REGULATION_OF_RELEASE_OF_SEQUESTERED_CALCIUM_ION_INTO_CYTOSOL	F2;F2R;GPER1;GSTM2;IL13;CXCL10;ITGB3;LHCGR;LYN;CXCL9;NOS1;P2RY6;BAX;CX3CL1;THY1;CD19	5.19415	5.92226e-10
GOBP_DICARBOXYLIC_ACID_TRANSPORT	GJA1;ITGB1;NTRK2;PSEN1;SLC1A1;TNF;TRH;TRPV1	4.79591	5.9898e-10
GOBP_RESPONSE_TO_ZINC_ION	CREB1;PARP1;ARG1;SOD2;TSPO;VCAM1	7.16063	6.53853e-10
GOBP_RESPONSE_TO_CALCIUM_ION	PDCD6;TXNIP;EDN1;FGA;FOS;ALOX15;JUN;MNAT1;CCND1;SDC1;BRAF;SYT1;THBS1;CASR;AKR1C3	3.69454	6.57863e-10
GOBP_NEGATIVE_REGULATION_OF_TRANSFORMING_GROWTH_FACTOR_BETA_RECEPTOR_SIGNALING_PATHWAY	FBN1;SIRT1;HDAC1;HDAC2;MIR342;PPARA;PPARG;HTRA1;ADAM17;TGFB1I1;TGFB3;TP53;TET1	4.60249	6.63689e-10
GOBP_PEPTIDE_ANTIGEN_ASSEMBLY_WITH_MHC_PROTEIN_COMPLEX	PDIA3;HLA-DPB1;HLA-DQB1;HLA-DRB1;B2M	19.6024	6.7292e-10
GOBP_TOLL_LIKE_RECEPTOR_3_SIGNALING_PATHWAY	F2RL1;PTPN22;TLR3;TNF	19.6024	6.7292e-10
GOBP_OLEFINIC_COMPOUND_METABOLIC_PROCESS	ADM;CYP1A1;CYP1A2;CYP1B1;CYP2B6;CYP2C19;CYP3A4;CYP11A1;CYP17A1;CYP19A1;AKR1C1;AKR1C2;EGR1;AKR1B1;ALOX15;FSHB;GPX4;GSTM2;GSTP1;HSD11B2;HSD17B1;HSD17B3;LHB;LIPE;CYP4F3;WNT4;PTGS2;SRD5A1;SRD5A2;AKR1C3	3.53346	6.96668e-10
GOBP_B_CELL_ACTIVATION_INVOLVED_IN_IMMUNE_RESPONSE	ADA;DOCK11;ERCC1;MSH6;TBX21;HSPD1;IL2;IL4;IL6;IL10;LGALS1;MLH1;MSH2;FOXP3;PTPRC;IL21;BCL6;STAT6;TGFB1;TLR4;XBP1;CD19;CD40LG	4.93838	7.00657e-10
GOBP_CELL_CELL_ADHESION_MEDIATED_BY_INTEGRIN	ADA;CXCL13;DPP4;ITGA5;ITGB1;CCL5;WNK1;SKAP1	25.3038	7.35356e-10
GOBP_REGULATION_OF_BMP_SIGNALING_PATHWAY	TOB1;FST;FBN1;DKK1;GATA6;GREM1;HOXA13;CCN1;RBPJ;ILK;KDR;HES5;MIR17;MIR20A;SMAD2;SMAD4;NOTCH1;PPARG;HTRA1;SFRP1;SFRP2;BMP4;GDF3	4.28928	7.45013e-10
GOBP_SEXUAL_REPRODUCTION	BCL2L11;FST;CIB1;KHDRBS1;CFTR;LRRK2;CNR1;CTNNB1;ACE;DNMT3A;EDN1;EDNRA;ERCC1;AKT1;FANCD2;FOXO3;PLCB1;SIRT1;CADM1;MTOR;FSHB;FSHR;GALNT3;NECTIN3;AMH;GJA1;HPGDS;GLI1;ANG;ANGPT2;GPX4;MSH6;DNMT3L;H2AX;HOXA10;HOXA11;HPGD;BIRC3;IGF1;IHH;IL1A;IL12B;INHBA;AR;ITGB1;LEP;LEPR;LHCGR;SMAD4;MAS1;MDK;MLH1;MMP2;MSH2;MST1R;ATM;NOS3;NOTCH1;CLDN11;PAEP;PGR;PLK1;WNT4;PPP2R1A;AXL;PTGS2;PTN;BAX;RB1;BCL2;BCL2L1;BCL6;BRD2…	1.86421	7.49134e-10
GOBP_POSITIVE_REGULATION_OF_CALCIUM_ION_TRANSPORT	CCR1;F2;F2R;GPER1;GSTM2;IL13;CXCL10;LGALS3;LHCGR;CXCL9;P2RX3;P2RX5;P2RY6;PDGFRB;BAX;CCL2;CCL5;CX3CL1;CXCL12;STC1;TSPO;THY1;TRPC6;UCN;CASR;CD19;MS4A1	3.94382	7.50438e-10
GOBP_GLIAL_CELL_DEVELOPMENT	CDK6;NDRG1;ERCC2;AKT1;DICER1;IFNG;IFNGR1;IL1B;IL6;ILK;KRAS;HES5;LYN;MIR142;MIR181C;MDK;NTRK2;TREM2;PSEN1;PTEN;SOD1;TLR2;TLR4;TNF;VIM	4.16073	7.61167e-10
GOBP_RESPONSE_TO_TEMPERATURE_STIMULUS	PDCD6;MTCO2P12;MMP24;ADM;CPB2;DIO2;NR2F6;AKT1;FGF1;FOXO1;SIRT1;FOS;MTOR;MSTN;GSK3B;HDAC2;HSPD1;IGF1;IGFBP7;IL1A;CXCL10;LYN;ATM;NFKBIA;NGFR;NOS1;NOS3;P2RX3;MAP2K7;PTGS2;CXCL12;SOD1;SOD2;SST;TACR1;THBS1;THRA;TRPV1;CXCR4;CALCA;RNF34;CD14	3.26328	8.09711e-10
GOBP_EPIDERMAL_CELL_DIFFERENTIATION	CDH3;YAP1;TXNIP;CTNNB1;DLX3;ERCC2;EZH2;FGF2;GATA6;INTU;GLI1;ANXA1;HDAC1;HDAC2;RBPJ;IL1A;KCNQ1;HES5;NOTCH1;ERRFI1;MED1;MAP2K1;ROCK1;BMP4;SOD1;VDR;ZFP36;CASP3;AKR1C3;GDF3	2.94191	8.20446e-10
GOBP_CENTRAL_NERVOUS_SYSTEM_NEURON_DIFFERENTIATION	CSF1R;ARX;DRD2;EPHB2;FGFR2;CHD5;GATA2;GLI3;HPRT1;INHBA;HES5;LEP;MAP2;NTRK2;DLL4;PSEN1;B2M;PTEN;BMPR1B;WNT7A;NDNF;NRP1;WNT3A;SLIT2;SEMA3E	3.37365	8.46393e-10
GOBP_TOLERANCE_INDUCTION	LILRB2;CD274;HLA-B;HLA-G;HMGB1;IL2RA;IDO1;LGALS9;LYN;FOXP3;PDCD1	11.2639	8.51488e-10
GOBP_REGULATION_OF_RAS_PROTEIN_SIGNAL_TRANSDUCTION	RASGRP1;AKAP13;CRK;CSF1;ADRA1A;EPHB2;EPO;F2R;F2RL1;FOXM1;NUP62;IGF1;APOE;ITGB1;KRAS;STMN1;MET;KITLG;NGF;NOTCH1;PDGFRB;PIK3CB;PIK3CG;RAF1;RASA1;BCL6;SRC;TGFB2;NRP1;SQSTM1	3.20343	8.53943e-10
GOBP_MAINTENANCE_OF_BLOOD_BRAIN_BARRIER	CLDN3;GJA1;ANGPT1;IL6;ITGB1;PTGS2;ACTB;SLC1A1;CLDN5;VEGFA;CLDN1	9.97512	8.5801e-10
GOBP_REGULATION_OF_LIPID_TRANSPORT	CETP;CRH;CRHR1;TTC39B;CYP19A1;AGT;AGTR1;EDN1;EGF;AKT1;SIRT1;ANXA2;APOA2;APOE;IL1A;IL1B;FASLG;ITGAV;ITGB3;LEP;MIR148A;MIR17;MIR27B;MIR30C1;MIR33A;MIR34A;MIF;NFKB1;NFKBIA;TREM2;PON1;PPARA;PPARG;RETN;REN;RXRA;SPP1;SSTR4;MIR33B;THBS1;TSPO;IRS2;ADIPOQ;LIPG;PTGES	3.56332	9.25136e-10
GOBP_NEGATIVE_REGULATION_OF_SUPRAMOLECULAR_FIBER_ORGANIZATION	CIB1;S1PR1;FKBP4;LMOD1;TMOD3;IAPP;APOE;STMN1;MIR20A;MIR21;MIR214;TACSTD2;MIR31;SMAD4;MAP2;MET;PIK3CA;TREM2;ARHGAP28;SLIT2	3.42249	9.38825e-10
GOBP_NEGATIVE_REGULATION_OF_CELL_GROWTH	CDKN1A;CDKN1B;CDKN2A;SEMA3C;AGT;AGTR2;ENO1;ESR2;SIRT1;SH3BP4;GREM1;GJA1;FOXP1;INHBA;SMAD3;SMAD4;MAP2;ENPP1;PPARA;PPP2R1A;PPT1;SEMA6A;RB1;BCL2;RGS4;BCL6;SFRP1;SFRP2;SLIT3;SPP1;BTG1;TGFB1;TGFB2;TP53;WT1;DCSTAMP;HYAL2;NRP1;WNT3A;ACVR1B;SCGB3A1;SLIT2;SEMA3E;CDH1	3.24054	9.68862e-10
GOBP_ZYMOGEN_ACTIVATION	CPB2;ENO1;FGA;ANXA2;HP;MMP14;SERPINE1;PLAU;THBS1;C1R;RUNX1	5.76743	1.06068e-09
GOBP_HORMONE_BIOSYNTHETIC_PROCESS	ADM;CYP11A1;CYP17A1;CYP19A1;DIO2;EGR1;AKR1B1;FSHB;NR3C1;HIF1A;HSD3B1;HSD3B2;HSD17B1;HSD17B3;HSD17B2;IGF1R;LHB;LHCGR;ARNT;NFKB1;HSD17B7;WNT4;MED1;SRD5A1;SRD5A2;TSPO;DHRS11;STC2	5.76743	1.06068e-09
GOBP_POSITIVE_REGULATION_OF_TYROSINE_PHOSPHORYLATION_OF_STAT_PROTEIN	CSF1R;CSF2;EPO;GH1;HDAC2;IFNG;IGF1;IL2;IL4;IL6;IL12B;IL13;IL15;IL18;HES5;LEP;LIF;LYN;IL23A;IL21;CCL5;TNF;TNFRSF1A;VEGFA;TSLP	5.76743	1.06068e-09
GOBP_REGULATION_OF_LIPID_KINASE_ACTIVITY	CCR7;F2;FGF2;FLT1;LYN;PDGFRA;PDGFRB;RB1;CCL19;CCL21;SRC;TEK;TGFB1;CD19;CDC42	5.76743	1.06068e-09
GOBP_ENDOTHELIAL_CELL_APOPTOTIC_PROCESS	PAK4;FGA;FOXO3;GATA2;GATA3;PDCD4;ANGPT1;GPER1;HLA-G;ICAM1;FASLG;IL4;IL10;IL11;IL13;KDR;MIR126;MIR132;NFE2L2;MIR375;SERPINE1;CCL2;BRAF;TEK;TERT;THBS1;TNF;NDNF;AKR1C3;CD40LG	5.76743	1.06068e-09
GOBP_MEMBRANE_PROTEIN_PROTEOLYSIS	IFNG;APOE;IL1B;IL10;MMP7;PSEN1;ROCK1;ADAM17;TGFB1;TIMP1;TIMP2;TIMP3;TIMP4;TNF;TNFRSF1B	6.45984	1.07101e-09
GOBP_TOLL_LIKE_RECEPTOR_4_SIGNALING_PATHWAY	F2RL1;PTPN22;TICAM2;LGALS9;LTF;LYN;NFKBIA;NINJ1;TREM2;TLR4;CD14	8.02997	1.08577e-09
GOBP_REGULATION_OF_LIPID_CATABOLIC_PROCESS	CDK4;CNR1;AKT1;HPGD;APOA2;IL1B;PIK3CG;PPARA;RARRES2;THRA;TNF;TWIST1;IRS2	6.07953	1.0901e-09
GOBP_REGULATION_OF_MITOTIC_CELL_CYCLE	SRA1;CDK4;CDKN1A;CDKN1B;CDKN2A;PHB2;CKS1B;CTNNB1;CYP1A1;DUSP1;EDN1;EGF;EGFR;EIF4EBP1;AIF1;ERCC2;AKT1;EZH2;FANCD2;PLCB1;SIRT1;NUP62;POLDIP2;TMOD3;ANXA1;HOXA13;APEX1;BIRC5;ID2;IGF1;IL1A;IL1B;IL10;INHBA;INSR;MIR195;MIR21;MIR214;MIR29C;MIR30C2;MDM2;MECP2;MNAT1;MSH2;MUC1;ATM;PDGFRB;PLK1;PRKCA;PTEN;MIR451A;RB1;CCND1;BCL2;ACTB;BCL6;CCL2;SMOC2;BMP4;BMP7;SMARCC1;BRCA1;BRCA2;ADAM17;BTG1;TERT;TFDP1;TNF;TP53…	2.17037	1.12003e-09
GOBP_ORGANIC_ACID_TRANSMEMBRANE_TRANSPORT	AGT;AKT1;SLC7A8;ITGB1;ARG1;PSEN1;RGS4;SLC1A1;SLC2A1;THBS1;TNF;SLC38A1;IRS2;SFXN1;CD36	3.53278	1.13075e-09
GOBP_FATTY_ACID_TRANSPORT	CRABP2;ACE;DRD2;EDN1;AKT1;ANXA1;APOE;IL1A;IL1B;LHCGR;MIF;PLA2G2A;PPARA;PPARG;RBP1;SLC2A1;SSTR4;THBS1;IRS2;CD36;PTGES	4.47268	1.13452e-09
GOBP_MYD88_DEPENDENT_TOLL_LIKE_RECEPTOR_SIGNALING_PATHWAY	HSPD1;BTK;TLR2;TLR4	14.7773	1.14177e-09
GOBP_REGULATION_OF_POTASSIUM_ION_TRANSPORT	ABCC9;DPP6;DRD2;NEDD4L;ITGB1;KCNQ1;MIR21;NOS1;NOS3;TREM2;RGS4;WNK1;VIP	4.18325	1.22362e-09
GOBP_REGULATION_OF_MITOCHONDRION_ORGANIZATION	BCL2L11;DNM1L;PPARGC1A;LRRK2;DCN;AKT1;GPER1;GSK3B;HGF;HIF1A;IAPP;IGF1;KDR;MMP9;TREM2;PPARG;MAPK8;PSMD10;BAX;BCL2L1;TSPO;TP53;TNFSF10;SQSTM1	3.59535	1.2259e-09
GOBP_MONOSACCHARIDE_BIOSYNTHETIC_PROCESS	PPARGC1A;FOXO1;AKR1B1;SIRT1;NR3C1;LEP;LEPR;MST1;PPARA;ADIPOQ	4.77887	1.24865e-09
GOBP_CIRCADIAN_RHYTHM	PPARGC1A;CLDN4;CREB1;CRH;PARP1;CSF2;AGRP;DRD2;EGR1;AHR;NR2F6;EZH2;SIRT1;MTOR;GHRH;GHRHR;GSK3B;HDAC1;HDAC2;ID2;LEP;NGFR;NOS2;NTRK2;PPARA;PPARG;MAPK8;PTEN;RORB;SLC6A4;SRD5A1;KLF9;HNF1B;KLF10;TNF;TP53;NR0B2;HDAC3;MTA1;ADIPOQ;CLOCK;NCOR1;CDK1;NR1D2	3.05905	1.28336e-09
GOBP_PROTEIN_POLYMERIZATION	DNM1L;CDKN1B;CCR7;CSF3;AIF1;FGA;FKBP4;ALOX15;MTOR;LMOD1;ANG;GPX4;TMOD3;HCK;STMN1;MIR214;MAP2;MECP2;MET;PAK1;RASA1;CCL11;CCL21;VTN;ARHGAP28;SLIT2	2.70268	1.28686e-09
GOBP_CELLULAR_RESPONSE_TO_XENOBIOTIC_STIMULUS	NAT2;ABCC4;CYP2R1;CYP1A1;CYP1A2;CYP1B1;CYP2B6;CYP2C19;CYP3A4;CYP26A1;AKR1C1;EDN1;AHR;FMO2;ANKRD1;GSTM1;GSTM2;GSTP1;IL1B;ITGB3;KCNQ1;MYC;NFE2L2;NOS1;NOS2;PCNA;UGT2B28;UGT1A1;AHRR;RB1;REN;BRAF;SULT1A1;SULT2A1;TLR3;TP53;UCHL1;VAV1;CXCR4;NR1I2;ADIPOQ	3.25682	1.31068e-09
GOBP_REGULATION_OF_ACTIN_FILAMENT_BASED_MOVEMENT	ACTA2;STC1	8.64302	1.31265e-09
GOBP_REGULATION_OF_ENDOTHELIAL_CELL_MIGRATION	PDCD6;CIB1;CXCL13;MAPK14;DCN;AGT;AGTR2;EDN1;EGF;AKT1;ETS1;FGF1;FGF2;SIRT1;GATA2;GATA3;FOXP1;ANGPT1;ANGPT2;ANXA1;HIF1A;HMGB1;APOE;ITGB3;KDR;MIR10B;MIR126;MIR132;MIR143;MIR20A;MIR200A;MIR200B;MIR200C;MIR204;MIR21;MIR210;MIR22;MIR27B;MIR29C;MIR30A;MIR31;MECP2;MET;MIR135B;MIR342;NFE2L2;NOS3;NOTCH1;SERPINF1;PIK3CB;PIK3CD;PIK3CG;DLL4;PPARG;PRKCA;PTGS2;MIR503;PTN;MIR483;SMOC2;BMP4;STC1;ADAM17;TDGF1;TEK;…	2.93148	1.3143e-09
GOBP_REGULATION_OF_CELL_ADHESION_MEDIATED_BY_INTEGRIN	ADA;CIB1;CXCL13;CRK;CYP1B1;DPP4;ITGB3;LIF;LYN;MUC1;SERPINE1;PIK3CG;PLAU;CCL5;CCL21;SFRP2;WNK1;SNAI2;TGFB2;SKAP1	7.28798	1.33077e-09
GOBP_REGULATION_OF_VASCULAR_PERMEABILITY	ADM;ANGPT1;APOE;CXCR2;SRC;TACR1;TEK;TGFB1;CLDN5;UCN;VEGFA;SLIT2	7.28798	1.33077e-09
GOBP_NEGATIVE_REGULATION_OF_MYELOID_LEUKOCYTE_MEDIATED_IMMUNITY	CX3CR1;LGALS9;CCR2	52.7061	1.34601e-09
GOBP_REGULATION_OF_SYSTEMIC_ARTERIAL_BLOOD_PRESSURE	ADM;ADRA1A;ACE;DRD2;AGT;AGTR1;AGTR2;EDN1;F2R;F2RL1;HSD11B2;AR;MIR17;MECP2;NOS3;OXTR;REN;WNK1;SOD2;TACR1;NR2F2;TNF;TRPV1;CALCA	4.58089	1.37857e-09
GOBP_REGULATION_OF_MACROPHAGE_CHEMOTAXIS	CSF1;CSF1R;IL34;CYP19A1;MSTN;MDK;MIF;MAPK1;MAPK3;RARRES2;CCL5;THBS1;C5	12.1818	1.45895e-09
GOBP_POSITIVE_REGULATION_OF_CYTOKINE_PRODUCTION_INVOLVED_IN_INFLAMMATORY_RESPONSE	HIF1A;IL6;IL17A;MIR17;MIR21;IL17D;STAT3;TLR4;TNF	12.1818	1.45895e-09
GOBP_REGULATION_OF_STEROID_METABOLIC_PROCESS	ADM;TTC39B;EGR1;FGF1;SIRT1;FSHB;NR5A1;NR3C1;IFNG;APOE;IGF1R;IGFBP7;IL1A;LEP;LHCGR;MIR30C1;MIR33A;NFKB1;WNT4;UGT1A1;SNAI2;SNAI1;SOD1;STAR;TSPO;TNF;AKR1C3	4.41048	1.4741e-09
GOBP_NEURON_MIGRATION	CRK;CTNNB1;ARX;DRD2;EMX2;ASTN2;GATA2;GATA3;GNRH1;MDK;NTRK2;NTRK3;AXL;PSEN1;SEMA6A;BAX;CX3CL1;CXCL12;STAT3;NR2F2;TWIST1;VEGFA;CXCR4;NDNF;NRP1;SEMA3E	3.29843	1.47678e-09
GOBP_REGULATION_OF_LIPID_STORAGE	CRP;TTC39B;SIRT1;IL6;ITGAV;ITGB3;LEP;MIR10B;MIR34A;NFKB1;NFKBIA;TREM2;PPARA;PPARG;TNF;C3;CD36	6.72491	1.49354e-09
GOBP_NEGATIVE_REGULATION_OF_CYTOSKELETON_ORGANIZATION	CIB1;S1PR1;FKBP4;LMOD1;TMOD3;STMN1;MIR20A;MIR21;MIR214;TACSTD2;SMAD4;MAP2;MET;PIK3CA;BRCA1;ARHGAP28;SLIT2	3.41914	1.52313e-09
GOBP_REGULATION_OF_EXTENT_OF_CELL_GROWTH	SEMA3C;CRABP2;DPYSL2;MEGF8;FN1;LPAR3;GSK3B;APOE;L1CAM;LIMK1;MAP2;NGF;SEMA6A;BDNF;CXCL12;SPP1;VEGFA;NRP1;WNT3A;SEMA3E;CDH1	4.26226	1.53411e-09
GOBP_REGULATION_OF_CYCLIN_DEPENDENT_PROTEIN_KINASE_ACTIVITY	CDKN1A;CDKN1B;CDKN2A;CDKN3;CEBPA;CKS1B;EGFR;AKT1;GTF2H1;MNAT1;HERC5;PLK1;PSMD10;PTEN;CCND1;ACTB;SRC;ADAM17;NR2F2;CASP3;CCNB1;CCNE1;CCNE2;CDC6	4.01709	1.55497e-09
GOBP_UNSATURATED_FATTY_ACID_METABOLIC_PROCESS	CYP1A1;CYP1A2;CYP1B1;CYP2B6;CYP2C19;AKR1C1;AKR1C2;EDN1;AKR1B1;SIRT1;ALOX15;HPGDS;GPX4;GSTM1;GSTM2;GSTP1;ANXA1;HPGD;IL1B;CYP4F3;MIR132;MIR204;MIF;PTGS2;TNFRSF1A;AKR1C3;PTGES;CD74	4.13218	1.56001e-09
GOBP_EPITHELIAL_STRUCTURE_MAINTENANCE	IL17A;MUC2;MUC4;SOX9;TFF3;TLR4	10.5596	1.56502e-09
GOBP_REGULATION_OF_MACROPHAGE_DERIVED_FOAM_CELL_DIFFERENTIATION	CETP;CRP;CSF1;CSF2;AGT;AGTR1;IL18;ITGAV;ITGB3;NFKB1;NFKBIA;PF4;PLA2G2A;PPARA;PPARG;ADIPOQ;CD36	10.5596	1.56502e-09
GOBP_MONOCYTE_CHEMOTACTIC_PROTEIN_1_PRODUCTION	GSTP1;IL1B;LGALS9;TWIST1;ADIPOQ	17.1421	1.62492e-09
GOBP_GLYCEROLIPID_BIOSYNTHETIC_PROCESS	FGF2;ALOX15;ANG;APOA2;IMPA2;MIR30C1;ATM;PDGFA;PIK3CA;PIK3CB;PIK3CD;PIK3CG;PTEN;C3;BECN1	2.79915	1.69932e-09
GOBP_COLLAGEN_CATABOLIC_PROCESS	MMP24;ITGB1;MMP1;MMP2;MMP3;MMP7;MMP9;MMP12;MMP13;MMP14	7.72095	1.72583e-09
GOBP_ALPHA_AMINO_ACID_METABOLIC_PROCESS	CTH;SARDH;IDO1;ARG1;MIR21;MECP2;NOS1;NOS2;NOS3;SRR;SLC38A1	3.06873	1.75095e-09
GOBP_PROTEIN_AUTOPHOSPHORYLATION	LRRK2;CSF1R;CSK;DAPK1;ACE;EGFR;EPHB4;ERBB2;AKT1;FGFR2;FLT1;DAPK2;MTOR;GREM1;GSK3B;HCK;IGF1R;INSR;JUN;KDR;LYN;ATM;NTRK2;PAK1;PDGFA;PDGFRA;PDGFRB;ENPP1;ERRFI1;MAPK3;PRLR;PTPRC;SRC;BTK;TEK;THY1;VEGFA;VEGFC;ACVR1B;ADIPOQ;RASSF2	2.93727	1.80093e-09
GOBP_REGULATION_OF_NOTCH_SIGNALING_PATHWAY	YAP1;POSTN;AKT1;HEY1;GATA2;HES5;MIR126;MMP14;NFKBIA;NOS3;NOTCH1;DLL4;BCL6;BMP7;SRC;STAT3;TGFB2	4.51344	1.80375e-09
GOBP_NEGATIVE_REGULATION_OF_PROTEIN_BINDING	CDKN1A;LRRK2;CRMP1;ACE;AKT1;DKK1;GSK3B;IFIT1;IL10;MIR148A;MIR27B;MAP2;PPARA;MAPK3;MAPK8;B2M;BAX;ACTB;ROCK1;SLPI;ADIPOQ	4.51344	1.80375e-09
GOBP_ESTABLISHMENT_OF_CELL_POLARITY	UST;CCR7;CRK;GATA3;GJA1;GSK3B;IGF1R;ITGB1;HES5;PLK1;ROCK1;CCL19;CCL21;FSCN1;EZR;WNT7A;CDC42	3.5321	1.83562e-09
GOBP_REGULATION_OF_CARBOHYDRATE_BIOSYNTHETIC_PROCESS	PPARGC1A;EGF;AKT1;FOXO1;SIRT1;GPER1;NR3C1;GSK3B;IGF1;INSR;LEP;LEPR;LHCGR;MIR195;MAS1;MST1;NFKB1;P2RY6;ENPP1;PPARA;TGFB1;IRS2;ADIPOQ	4.34999	1.90762e-09
GOBP_HORMONE_MEDIATED_SIGNALING_PATHWAY	YAP1;CARM1;PHB2;UCN3;CRHR1;CRHR2;PARP1;DDX5;AGRP;ESR1;ESR2;ESRRB;FKBP4;SIRT1;FSHR;NR5A2;NR5A1;GHRHR;FOXP1;GPER1;NR3C1;GTF2H1;HDAC1;AR;LHB;LHCGR;NR3C2;PAK1;PGR;PPARA;PPARG;MED1;TRERF1;VPS11;PRLR;RARB;RXFP1;REN;RXRA;SFRP1;SKP2;BMP4;BMP7;SRC;BRCA1;SST;SSTR1;SSTR4;TCF21;THRA;NR2C1;TRH;ARID1A;NCOA1;UCN2;CLOCK;NCOR1;NR1D2	3.15264	1.95471e-09
GOBP_POSITIVE_REGULATION_OF_TYPE_2_IMMUNE_RESPONSE	GATA3;IL4;IL6;IL18;IDO1;IL33;CD86;CD74	21.1007	2.03026e-09
GOBP_LYMPH_NODE_DEVELOPMENT	IL7R;IL15;LTA;TGFB1	21.1007	2.03026e-09
GOBP_MACROPHAGE_DIFFERENTIATION	CEBPA;PARP1;CSF1;CSF1R;CSF2;IL34;SIRT1;GATA2;GBA;HLA-DRB1;ID2;IFNG;IL15;INHA;INHBA;LIF;MIR145;MMP9;PF4;PRKCA;RB1;BMP4;TGFB1;TLR2;VEGFA;ADIPOQ;CDC42	7.04573	2.03657e-09
GOBP_REGULATION_OF_NEUROTRANSMITTER_LEVELS	PRRT2;LRRK2;CNR1;COMT;ADRA1A;DRD2;GDNF;GPER1;GSK3B;NR4A1;ITGB1;ITGB3;MAOA;MAOB;NOS1;PPT1;PRKCB;PSEN1;SLC6A4;SNCG;BRAF;SYP;SYT1;WNT7A;SLC38A1	2.9605	2.1077e-09
GOBP_REGULATION_OF_G_PROTEIN_COUPLED_RECEPTOR_SIGNALING_PATHWAY	ADA;ADM;DRD2;EDN1;F2;PLCB1;GPER1;CXCL8;ITGB3;STMN1;MET;OPRM1;PRKCA;RGS4;ROCK1;SAG;CCL5;SSTR4;SYP;C3;RGS6	3.6669	2.13687e-09
GOBP_ENDOCARDIAL_CUSHION_MORPHOGENESIS	HEY1;RBPJ;SMAD4;MDM2;NOS3;NOTCH1;BMP4;BMP7;SNAI2;SNAI1;SOX9;TGFB1;TGFB2;TGFB3;TGFBR1;TWIST1	8.26705	2.14941e-09
GOBP_SEMI_LUNAR_VALVE_DEVELOPMENT	HEY1;GATA3;RBPJ;NOS3;NOTCH1;DLL4;RB1;ROCK1;BMP4;SLIT3;SNAI2;SNAI1;SOX9;TGFB1;TGFB2;TNFRSF1A;TNFRSF1B;TWIST1;SLIT2	8.26705	2.14941e-09
GOBP_HEART_VALVE_MORPHOGENESIS	HEY1;MTOR;GATA3;CCN1;SMAD4;MDM2;NOS3;NOTCH1;DLL4;RB1;ROCK1;BMP4;SLIT3;SNAI2;SNAI1;SOX9;TGFB1;TGFB2;TWIST1;SLIT2	6.52739	2.21808e-09
GOBP_VENTRICULAR_CARDIAC_MUSCLE_TISSUE_DEVELOPMENT	EDNRA;FGFR2;ID2;RBPJ;SMAD4;NOTCH1;DLL4;MED1;TGFB1;TGFB2;TGFBR1	6.52739	2.21808e-09
GOBP_POSITIVE_REGULATION_OF_PHOSPHOLIPASE_ACTIVITY	PHB2;ADRA1A;AGT;AGTR1;EDNRA;EGFR;ESR1;FGF2;FGFR2;FLT1;ANG;CCN1;P2RY6;PDGFRA;PDGFRB;CCL5;SELE;LPAR2;CD86	6.52739	2.21808e-09
GOBP_FC_RECEPTOR_SIGNALING_PATHWAY	CD200R1;FCGR3A;HCK;LIMK1;LYN;PAK1;MAPK8;MAP2K7;PTPRC;SRC;BTK;VAV1;CD47	6.52739	2.21808e-09
GOBP_HEART_VALVE_DEVELOPMENT	HEY1;MTOR;GATA3;CCN1;RBPJ;SMAD4;MDM2;NOS3;NOTCH1;DLL4;RB1;ROCK1;BMP4;SLIT3;SNAI2;SNAI1;SOX9;TGFB1;TGFB2;TNFRSF1A;TNFRSF1B;TWIST1;SLIT2	5.78888	2.21834e-09
GOBP_ACIDIC_AMINO_ACID_TRANSPORT	GJA1;ITGB1;NTRK2;PSEN1;SLC1A1;TNF;TRH;TRPV1	5.78888	2.21834e-09
GOBP_NEGATIVE_REGULATION_OF_NEURON_APOPTOTIC_PROCESS	PPARGC1A;CX3CR1;F2R;PLXND1;GBA;GDNF;ANGPT1;HIF1A;APOE;IL10;JUN;KDR;KRAS;MIR181C;MDK;MECP2;MSH2;NGF;NTF3;NTF4;NTRK2;PIK3CA;PPT1;AXL;PSEN1;BAX;RASA1;CCND1;BCL2;BCL2L1;ROCK1;BDNF;CCL2;CX3CL1;SLC1A1;SOD1;SOD2;BRAF;TERT;TGFB3;NDNF;NRP1;SEMA3E	3.5013	2.23886e-09
GOBP_MATERNAL_PROCESS_INVOLVED_IN_FEMALE_PREGNANCY	CNR1;PARP1;AGRP;EPOR;AKT1;ESR1;GJB2;ANGPT2;IHH;AR;ARG1;LGALS9;LIF;PGR;WNT4;MED1;PTGS2;PTN;SPP1;STC1;BSG;NR2F2;VDR;STC2	6.11991	2.27212e-09
GOBP_CELLULAR_BIOGENIC_AMINE_METABOLIC_PROCESS	COMT;DRD2;EDNRA;GATA3;HPRT1;IDO1;ITGAM;MAOA;MAOB;MECP2;SLC1A1;SULT1A1;TGFB2;TRH;HAND2	4.44796	2.34987e-09
GOBP_KIDNEY_MORPHOGENESIS	LRRK2;CTNNB1;AGT;AGTR2;FGF1;FGF2;GATA3;GREM1;GDNF;GLI3;HOXA11;ILK;HES5;LIF;TACSTD2;SMAD4;MYC;PAX2;PDGFRB;WNT4;BCL2;BMP4;BMP7;SOX9;HNF1B;TCF21;VEGFA;WT1;PAX8;HS3ST3B1	4.44796	2.34987e-09
GOBP_POSITIVE_REGULATION_OF_ALPHA_BETA_T_CELL_PROLIFERATION	CD55;PTPN22;IL12B;IL18;LGALS9;IL23A;PTPRC;CCR2;TYK2;CARD11	13.4337	2.38622e-09
GOBP_MULTICELLULAR_ORGANISM_GROWTH	CDK4;CREB1;CSF1;DRD2;ERCC1;ERCC2;ERCC6;MTOR;GH1;GHRH;GHRHR;IGF1;IHH;AR;ATM;PIK3CA;PRL;RARB;BCL2;SOD1;STAT3;TP53;EZR;STC2	3.56361	2.43822e-09
GOBP_NEGATIVE_REGULATION_OF_LIPID_METABOLIC_PROCESS	CNR1;AKT1;FMO2;SIRT1;GPER1;APOA2;APOE;IL1B;MIR132;MIR204;MIR30C1;MIR33A;NFKB1;PDGFA;PIK3CG;WNT4;UGT1A1;SNAI2;SNAI1;SOD1;SOX9;BRCA1;TNF;AKR1C3;NCOR1	4.15424	2.51074e-09
GOBP_REGULATION_OF_CHRONIC_INFLAMMATORY_RESPONSE	CYP19A1;IL4;IL10;IDO1;LTA;FOXP3;CCL5;TNF	94.9671	2.55774e-09
GOBP_REGULATION_OF_T_HELPER_1_CELL_DIFFERENTIATION	IL27;ANXA1;CCL19	94.9671	2.55774e-09
GOBP_REGULATION_OF_GLIAL_CELL_DIFFERENTIATION	IL34;CTNNB1;F2;DICER1;MTOR;TNFRSF21;HDAC1;HDAC2;ID2;IL6;HES5;LIF;MIR142;MIR181C;MDK;NOTCH1;NTRK3;TREM2;PTN;TGFB1;TLR2;TNFRSF1B;CXCR4;IL33;CDK1	5.18435	2.59557e-09
GOBP_NEGATIVE_REGULATION_OF_CELL_DEVELOPMENT	SEMA3C;LILRB1;CTNNB1;EPHB2;F2;FBLN1;FBN1;KIFAP3;DICER1;GSK3B;IGF1;IL1A;IL1B;IL6;HES5;LTF;MIR181C;TACSTD2;MAP2;NOTCH1;NTRK3;PAEP;TREM2;PSEN1;B2M;PTEN;SEMA6A;PTN;RB1;CCL11;GORASP1;BMP7;SPP1;TSPO;THY1;TNF;TP53;VEGFA;TRPV1;WNT7A;ACTN4;NRP1;WNT3A;SEMA3E;CDH1	3.16604	2.65634e-09
GOBP_RESPONSE_TO_GONADOTROPIN	CYP1B1;EDN1;EDNRA;FSHR;GATA6;GJB2;INHBA;LHCGR;MAS1;NOTCH1;PAPPA;SRD5A1;SRD5A2;WT1;PAX8	11.3114	2.77816e-09
GOBP_EPITHELIAL_TUBE_BRANCHING_INVOLVED_IN_LUNG_MORPHOGENESIS	YAP1;CTNNB1;FGFR2;KRAS;BMP4;SOX9;TNF	11.3114	2.77816e-09
GOBP_ENDOCRINE_PROCESS	CRH;CRHR1;CYP19A1;ACE;AGT;AGTR1;AGTR2;EDN1;F2R;F2RL1;GATA3;GJA1;GNRHR;HSD11B2;IL1B;AQP1;INHA;INHBA;KCNQ1;KISS1;KRAS;LEP;SMAD4;NOS3;OXTR;PPARG;RETN;REN;SPP1;TACR1;TSPO;UCN	4.55804	2.86347e-09
GOBP_CELLULAR_LIPID_CATABOLIC_PROCESS	SMPDL3A;CNR1;CYP1B1;CYP26A1;DECR1;AKT1;PLCB1;GBA;APOA2;LEP;LIPC;LIPE;PIK3CG;PPARA;PPT1;TWIST1;AKR1C3;IRS2;ADIPOQ;LIPG	2.92639	2.88505e-09
GOBP_NEGATIVE_REGULATION_OF_EXTRINSIC_APOPTOTIC_SIGNALING_PATHWAY	YAP1;CSF2;AKT1;FGA;GDNF;GSK3B;GSTP1;HGF;ICAM1;IGF1;IL1A;IL1B;IL4;IL7;AR;ITGAV;LGALS3;NOS3;SERPINE1;PF4;RAF1;BCL2;RELA;BCL2L1;CX3CL1;SFRP2;BMP4;SNAI2;SRC;BRCA1;TERT;TGFBR1;THBS1;TNF;RNF34;PEA15;NRP1	4.38434	3.04843e-09
GOBP_SMAD_PROTEIN_SIGNAL_TRANSDUCTION	TOB1;PARP1;FOS;MSTN;INHA;INHBA;JUN;SMAD2;SMAD3;SMAD4;PPARG;BMP4;BMP7;TGFB1;TGFB2;TGFB3;LEFTY2;TGFBR1;VIM;GDF3	4.91105	3.05851e-09
GOBP_FACE_DEVELOPMENT	COL1A1;DLX5;EDNRA;DKK1;MMP2;PDGFRA;MAPK1;MAPK3;MAP2K1;RAF1;BRAF;TGFB3;CLDN5;CRISPLD2	6.81614	3.07655e-09
GOBP_PATHWAY_RESTRICTED_SMAD_PROTEIN_PHOSPHORYLATION	DKK1;GREM1;MSTN;AMH;AMHR2;INHA;INHBA;SMAD4;PPARG;BMP4;BMP7;TGFB1;TGFB2;TGFB3;LEFTY2;TGFBR1;GDF3	5.65494	3.12512e-09
GOBP_CELLULAR_NITROGEN_COMPOUND_CATABOLIC_PROCESS	ADA;MIR543;TOB1;SMPDL3A;CRMP1;MAPK14;CYP3A4;DDX5;DPYSL2;ELAVL1;TET3;AKT1;FEN1;ZHX2;DICER1;GALT;GDNF;ANG;HPRT1;APEX1;IL6;IDO1;EIF3E;ISG20;MLH1;ATM;YBX1;NT5E;OGG1;ENPP1;ENPP3;UGT1A1;PRKCA;BAX;RNASE3;ROCK1;TNFRSF1B;VIM;VIP;ZFP36;TET1;SUCLG2;ENTPD1	2.18224	3.16835e-09
GOBP_SUBSTRATE_ADHESION_DEPENDENT_CELL_SPREADING	CIB1;OLFM4;CRK;FBLN1;FGA;FN1;ILK;ITGAV;ITGB3;LAMB1;TACSTD2;MDK;AXL;SRC;BRAF;TEK;ACTN4;FZD7;NRP1;CDC42	4.10226	3.19496e-09
GOBP_POSITIVE_REGULATION_OF_PLASMA_MEMBRANE_BOUNDED_CELL_PROJECTION_ASSEMBLY	CCR7;DOCK11;F2RL1;MTOR;MSTN;GSK3B;PIK3CA;CCL19;CCL21;FSCN1;TGFB3;TGFBR1;NRP1;CDC42	4.10226	3.19496e-09
GOBP_KERATINOCYTE_PROLIFERATION	CDH3;YAP1;FST;FGFR2;INTU;AREG;MIR21;MDK;MED1;SNAI2;KLF9;ZEB1;VDR;ZFP36	6.34102	3.25825e-09
GOBP_RESPONSE_TO_TESTOSTERONE	EDN1;EPO;SIRT1;GBA;MSTN;FOXP1;HOXA10;HOXA11;HOXA13;IGF1R;AR;SPP1;SRD5A1;SRD5A2;THBS1;TSPO	7.9224	3.45525e-09
GOBP_CYTOKINE_PRODUCTION_INVOLVED_IN_INFLAMMATORY_RESPONSE	SIRPA;MAPK14;EPHB2;EZH2;F2;PDCD4;HIF1A;IL6;IL17A;LEP;MIR17;MIR21;NOS2;MIR378A;IL17D;TREM2;PPARA;STAT3;TLR4;TNF;IL1R2	5.08453	3.52681e-09
GOBP_NEGATIVE_REGULATION_OF_INNATE_IMMUNE_RESPONSE	ADAR;LILRB1;CRK;PARP1;DRD2;HLA-B;HLA-G;KIR2DL4;KLRC1;ARG1;LGALS9;MIR21;MMP12;PPARG;SERPING1;NLRC5	5.08453	3.52681e-09
GOBP_CELLULAR_RESPONSE_TO_LOW_DENSITY_LIPOPROTEIN_PARTICLE_STIMULUS	ITGB1;PPARG;CASR;CD36	15.2423	3.65401e-09
GOBP_RESPONSE_TO_HYDROGEN_PEROXIDE	TXNIP;LRRK2;COL1A1;CRK;SIRPA;CYP1B1;EDN1;EZH2;FOXO3;SIRT1;FOXP1;ANXA1;HDAC2;HGF;HP;APEX1;IL6;AQP1;IL10;AREG;ARG1;MIRLET7B;MIR17;MIR21;MIR34A;MET;MMP2;NFE2L2;PAX2;PCNA;PDGFRB;AXL;BCL2;RELA;SDC1;SOD1;SOD2;SRC;STAT6;TXN;CASP3;CAT;BECN1;CDK1	3.75041	3.68211e-09
GOBP_POSITIVE_REGULATION_OF_PEPTIDE_SECRETION	CFTR;UCN3;CRH;DRD2;FGA;GHRH;GHRHR;GPER1;HIF1A;HLA-DRB1;KISS1;PSMD9;TRH;UCN;NR0B2;CASR;IRS2	4.4889	3.74122e-09
GOBP_NEGATIVE_REGULATION_OF_CELL_CYCLE	CDK6;CDKN1A;CDKN1B;CDKN2A;CEBPA;LILRB1;NUDT6;MAPK14;CTNNB1;DUSP1;ERCC6;EZH2;FANCD2;SIRT1;GATA3;GPER1;H2AX;HLA-G;NR4A1;HPGD;BIRC5;IL10;INHA;INHBA;LIF;MIR195;MIR21;MIR29C;MIR30C2;MDM2;MSH2;MUC1;ATM;PLK1;PTEN;PTGS2;MIR451A;MIR503;RB1;CCND1;BCL2;BCL6;CCL2;BMP4;BMP7;SOX2;BRCA1;BRCA2;BTG1;TERF1;NR2F2;TGFB1;TNF;TP53;XRCC3;CASP3;RUNX3;CCNB1;CLOCK;CDK1;CDC6	2.30637	3.83814e-09
GOBP_REGULATION_OF_PROTEIN_MATURATION	LRRK2;CPB2;ENO1;ANXA2;USP17L2;MMP14;SERPINE1;PLAU;SRC;THBS1;IL1R2;RUNX1	5.28702	3.97766e-09
GOBP_AMINE_METABOLIC_PROCESS	COMT;CYP1A1;DRD2;EDNRA;GATA3;HPRT1;IDO1;ITGAM;MIR21;MAOA;MAOB;MECP2;SLC1A1;SULT1A1;TGFB2;TRH;VCAM1;HAND2	3.93884	3.98722e-09
GOBP_POSITIVE_T_CELL_SELECTION	MTOR;TBX21;IL6;IL12B;IL12RB1;FOXP3;IL23A;PTPRC;BCL2;BRAF;STAT3;STAT6;CD74	8.54949	4.22102e-09
GOBP_CARDIAC_EPITHELIAL_TO_MESENCHYMAL_TRANSITION	HEY1;PDCD4;RBPJ;MIR21;SMAD4;NOTCH1;BMP4;SNAI2;SNAI1;TGFB1;TGFB2;TGFB3;TGFBR1;TWIST1	8.54949	4.22102e-09
GOBP_REGULATION_OF_MEMBRANE_POTENTIAL	CFTR;SCN11A;UCN3;LRRK2;CNR1;PARP1;ADRA1A;DCN;DRD2;EDN1;AKT1;NEDD4L;MTOR;GBA;GJA1;GPER1;GSK3B;KCNQ1;KDR;MECP2;NTRK2;OPRM1;P2RX3;P2RX5;TREM2;PSEN1;PTEN;BAX;BCL2;BCL2L1;RGS4;SOD1;SOD2;SRC;TACR1;TSPO;TNF;TRPV1;WNT7A;S1PR2;CD36	2.25377	4.37903e-09
GOBP_CELLULAR_RESPONSE_TO_REACTIVE_OXYGEN_SPECIES	CHUK;LRRK2;SIRPA;CYP1B1;EDN1;EGFR;AKT1;EZH2;FOXO3;SIRT1;FOS;FOXP1;ANXA1;HDAC2;HGF;APEX1;IL6;AQP1;IL10;JUN;ARG1;MIRLET7B;MIR17;MIR21;MIR34A;MET;MMP2;MMP9;MPO;NFE2L2;NOS3;PAX2;PCNA;PDGFRA;AXL;MAPK1;MAPK3;MAPK8;RELA;BMP7;SOD1;SOD2;SRC;STAT6;BTK;TXN;CAT;AKR1C3;BECN1;CD36;CDK1	3.46875	4.42417e-09
GOBP_PROTEIN_DEPHOSPHORYLATION	LILRB2;CDKN3;FCRL3;DRD2;DUSP1;DUSP2;DUSP6;AGTR2;MTOR;PTPN22;GBA;GSK3B;LGALS3;PDGFRB;ACP1;PPP2R1A;PPP5C;PTBP1;PTEN;PTPRC;PTPRD;BCL2;ROCK1;TGFB1;TNF;PPP1R2C	2.70451	4.6101e-09
GOBP_NEURON_PROJECTION_REGENERATION	ADM;HGF;TNC;IGF1R;JUN;MMP2;MAP2K1;PTEN;PTN;BCL2;SPP1;BRAF;TSPO;THY1	5.81463	4.64174e-09
GOBP_POSITIVE_REGULATION_OF_T_CELL_CYTOKINE_PRODUCTION	CD55;GATA3;TBX21;IL1B;IL1R1;IL4;IL6;IL18;B2M;IL18R1	12.3141	4.75448e-09
GOBP_ANTIGEN_PROCESSING_AND_PRESENTATION_OF_ENDOGENOUS_ANTIGEN	HLA-B;HLA-C;HLA-DRB1;HLA-G;B2M;CD74	12.3141	4.75448e-09
GOBP_POSITIVE_REGULATION_OF_MACROPHAGE_MIGRATION	CSF1;CSF1R;IL34;CX3CR1;MSTN;MDK;MMP14;TREM2;MAPK1;MAPK3;RARRES2;CCL5;CX3CL1;THBS1	12.3141	4.75448e-09
GOBP_POSITIVE_REGULATION_OF_INTERLEUKIN_2_PRODUCTION	ANXA1;IL1A;IL1B;PTPRC;CCR2;CARD11;RUNX1;CD86	9.38585	4.84678e-09
GOBP_PROTEIN_LOCALIZATION_TO_NUCLEUS	CDKN1A;YAP1;TXNIP;PHB2;LRRK2;COL1A1;PARP1;MAPK14;CSE1L;AGT;ELAVL1;AKT1;F2;FGF9;NUP62;NR5A1;GLI3;ANGPT1;GSK3B;IFNG;LEP;LIF;LMNB1;SMAD3;MDM2;MMP12;NFKBIA;NGFR;NOTCH1;PLK1;MED1;PSEN1;PTGS2;BMP4;BMP7;SOX9;SRC;STAT3;TERT;TGFB1;TP53;TXN;RGPD2;HYAL2;HDAC3;SQSTM1;CD36;IPO13;CDK1;CDH1	2.53693	4.95085e-09
GOBP_POSITIVE_REGULATION_OF_PROTEIN_LOCALIZATION_TO_MEMBRANE	CIB1;AGR2;EGFR;EPHA3;EPHB2;ERBB2;AKT1;GPER1;IFNG;ITGAM;ITGB1;RHOG;LGALS3;TREM2;MAPK8;TNF;EZR;SQSTM1;WNT3A	4.26243	5.06771e-09
GOBP_CD4_POSITIVE_ALPHA_BETA_T_CELL_CYTOKINE_PRODUCTION	GATA3;TBX21;IL1B;IL1R1;IL4;IL6;IL18;ARG1;IL18R1	18.0951	5.07178e-09
GOBP_ANTIGEN_PROCESSING_AND_PRESENTATION_OF_PEPTIDE_ANTIGEN_VIA_MHC_CLASS_I	ACE;PDIA3;HLA-B;HLA-C;HLA-G;B2M	10.557	5.10799e-09
GOBP_REGULATION_OF_PLATELET_AGGREGATION	IL6;LYN;PRKCA	10.557	5.10799e-09
GOBP_CARDIAC_SEPTUM_DEVELOPMENT	SEMA3C;FGFR2;PLXND1;HEY1;GATA3;GATA6;HOXA13;CCN1;RBPJ;SMAD4;MDM2;NOS3;NOTCH1;SALL4;BMP4;BMP7;SLIT3;TGFB2;TGFBR1;TP53;PAX8;NRP1;SLIT2	4.12379	5.14832e-09
GOBP_NEURAL_TUBE_DEVELOPMENT	SEMA3C;CTHRC1;ADM;INTU;GLI3;HIF1A;HES5;NOTCH1;PAX2;PSEN1;SALL4;BRD2;SDC4;SFRP1;SFRP2;BMP4;BMP7;TGFB1;TGFB2;TWIST1;CASP3;BCL10;WNT3A	3.30603	5.23234e-09
GOBP_LEUKOCYTE_AGGREGATION	IL1B;BMP7;CD44	35.1494	5.37419e-09
GOBP_CARBOHYDRATE_TRANSMEMBRANE_TRANSPORT	MAPK14;ACE;EDN1;EDNRA;AKT1;GH1;IGF1;IL1B;AQP1;AQP2;INSR;AQP9;LEP;MIR143;NFE2L2;ENPP1;PRKCB;SLC2A1;SLC2A3;SLC2A4;BRAF;TERT;TNF;C3;IRS2;PEA15;ADIPOQ	3.6738	5.63191e-09
GOBP_POSITIVE_REGULATION_OF_LIPASE_ACTIVITY	PHB2;ADRA1A;AGT;AGTR1;EDNRA;EGFR;ESR1;FGF2;FGFR2;FLT1;ANG;CCN1;RHOC;P2RY6;PDGFRA;PDGFRB;CCL5;SELE;LPAR2;CD86	5.40424	6.05804e-09
GOBP_ENDOMEMBRANE_SYSTEM_ORGANIZATION	DNM1L;NDRG1;PRRT2;CLCN3;LRRK2;ANO4;CREB1;AKT1;F2R;GPER1;ANXA2;TICAM2;FASLG;AQP1;AR;LMNB1;TMED7;VTA1;PLK1;PRKCA;PRKCB;VPS11;MAPK1;MAPK3;MAP2K1;PTEN;PTPRC;GORASP1;SOD1;STX5;SYP;SYT1;TGFB2;YWHAZ;CXCR4;BAG6;SQSTM1;CDK1;CDC42	2.0165	6.41619e-09
GOBP_CARDIAC_MUSCLE_CONTRACTION	ABCC9;ADRA1A;CCN2;NEDD4L;MTOR;GJA1;GSTM2;KCNQ1;MIR200C;NOS1;PIK3CA;PIK3CG;STC1;UCN;CXCR4	3.56409	6.43147e-09
GOBP_INTRINSIC_APOPTOTIC_SIGNALING_PATHWAY_IN_RESPONSE_TO_DNA_DAMAGE	BCL2L11;CDKN1A;ERCC6;SIRT1;MSH6;MIF;MLH1;MSH2;MUC1;ATM;ACKR3;BAX;BCL2;BCL2L1;CXCL12;SFRP2;SNAI2;SNAI1;SOD2;BRCA1;BRCA2;TNF;TNFRSF1A;TNFRSF1B;TP53;TPT1;BAG6;CD44;CD74	4.20398	6.49532e-09
GOBP_NEGATIVE_REGULATION_OF_VASCULATURE_DEVELOPMENT	CTNNB1;DCN;AGT;ANGPT2;HLA-G;FASLG;CXCL10;MIR143;MIR145;MIR17;MIR20A;MIR200B;MIR21;MIR214;MIR29C;MIR30C1;MIR34A;MECP2;MIR375;SERPINE1;SERPINF1;PF4;PIK3CB;WNT4;PPARG;PRL;MIR503;SEMA6A;ROCK1;TEK;TGFB2;THBS1;CLDN5;TNF;CCR2;CREB3L1;SEMA3E	3.40825	6.51069e-09
GOBP_CAMP_MEDIATED_SIGNALING	ADM;CREB1;AHR;GHRHR;SOX9;UCN	6.4036	6.77046e-09
GOBP_REGULATION_OF_HORMONE_METABOLIC_PROCESS	ADM;EGR1;GATA3;NR3C1;HIF1A;IGF1R;LHCGR;ARNT;NFKB1;WNT4;PAX8;STC2;AKR1C3	8.1607	6.87537e-09
GOBP_REGULATORY_T_CELL_DIFFERENTIATION	LILRB2;CTLA4;FANCD2;FOXO3;HLA-DRB1;HLA-G;IFNG;IL2;LGALS9;MIR21;MDK;FOXP3;BCL6	8.1607	6.87537e-09
GOBP_HEMATOPOIETIC_PROGENITOR_CELL_DIFFERENTIATION	CDK6;ADAR;FST;CSF1R;ACE;ERCC2;FLT1;GATA2;GATA3;HOXB4;INHBA;KDR;HES5;LYN;KITLG;MYB;NFE2L2;NOTCH1;PDGFRA;MED1;PSEN1;PTPRC;BCL2;SFRP1;BMP4;BRAF;TGFB1;TP53;ZFP36;HYAL2	3.6366	6.938e-09
GOBP_CENTRAL_NERVOUS_SYSTEM_NEURON_DEVELOPMENT	ARX;DRD2;EPHB2;FGFR2;GATA2;HPRT1;LEP;MAP2;NTRK2;PTEN;NDNF;NRP1;SLIT2;SEMA3E	4.66105	7.17806e-09
GOBP_CELL_CYCLE_G1_S_PHASE_TRANSITION	CDK4;CDK6;CDKN1A;CDKN1B;CDKN2A;CDKN3;KHDRBS1;PHB2;CYP1A1;EGFR;EIF4EBP1;AIF1;AKT1;ESRRB;EZH2;PLCB1;GLI1;ANXA1;APEX1;ID2;INHBA;ITGB1;MIR214;MIR29C;MIR30C2;MDM2;MNAT1;MUC1;MYC;ATM;POLE;PTEN;MIR451A;MIR503;RB1;CCND1;BCL2;ACTB;CCL2;SKP2;SMARCC1;SOX2;ADAM17;TERT;TFDP1;TP53;ARID1A;KLF11;CCNE1;ACVR1B;CCNE2;CDC6	2.60645	7.18805e-09
GOBP_POSITIVE_REGULATION_OF_DNA_BIOSYNTHETIC_PROCESS	CTNNB1;CYP1B1;FGF2;GREM1;HGF;MYC;ATM;PCNA;PDGFRB;MAPK1;MAPK3;MAP2K7;SMOC2;SRC;TNF	5.0753	7.38695e-09
GOBP_PROTEIN_STABILIZATION	PPARGC1A;PHB2;CREB1;HSPD1;APOA2;IGF1;SMAD3;PTEN;TP53;TYROBP;BAG6;NAA16;RASSF2	2.90352	7.39612e-09
GOBP_CELL_JUNCTION_DISASSEMBLY	CX3CR1;DKK1;ITGAM;TREM2;CX3CL1;SNAI2;TGFB3;TGFBR1;C3	13.7182	7.73165e-09
GOBP_EMBRYONIC_EYE_MORPHOGENESIS	FBN1;IHH;PAX2;RARB;BMP7;ZEB1;TWIST1	8.89165	8.20574e-09
GOBP_NEGATIVE_REGULATION_OF_CD4_POSITIVE_ALPHA_BETA_T_CELL_ACTIVATION	CD274;TBX21;ANXA1;HMGB1;IL2;IL4;LGALS9;FOXP3;BCL6;RUNX1;RUNX3	8.89165	8.20574e-09
GOBP_REGULATION_OF_ORGAN_GROWTH	BCL2L11;YAP1;MAPK14;ARX;DUSP6;EDN1;AKT1;FGF2;FGF9;FGFR2;GATA6;FOXP1;GLI1;IGF1;RBPJ;IL7;MIR200B;MIR204;NOTCH1;PPARA;PTEN;RGS4;SLC6A4;SOD1;TGFBR1;WT1;RUNX1;CDK1	4.14712	8.2932e-09
GOBP_MUSCLE_ORGAN_MORPHOGENESIS	S1PR1;EDNRA;FGFR2;ANKRD1;RBPJ;LIF;MIR143;MIR145;MIR195;SMAD4;NOTCH1;DLL4;MED1;BMP4;TGFB1;TGFB2;TGFBR1	4.80688	8.53464e-09
GOBP_REGULATION_OF_REPRODUCTIVE_PROCESS	ADA;CDKN1B;CIB1;CNR1;CTNNB1;DUSP1;ESR1;FGF9;PLCB1;NR5A1;AMH;GJA1;HPGDS;GNRH1;HDAC2;IGF1;RBPJ;IL1A;INHBA;INSR;AR;ITGB3;USP17L2;LIF;NOTCH1;OXTR;PAEP;SERPINF1;WNT4;PPP2R1A;RETN;BAX;BCL2L1;SFRP1;BMP4;BMP7;SNAI1;SOD1;SOX9;SRC;SRY;TACR1;TIMP1;VEGFA;VIP;WT1;ZP3;ACVR1B	2.92708	8.68612e-09
GOBP_REGULATION_OF_PROTEIN_MODIFICATION_BY_SMALL_PROTEIN_CONJUGATION_OR_REMOVAL	PDCD6;LRRK2;CTNNB1;EGR1;AKT1;PTPN22;ANGPT1;HIF1A;BIRC2;BIRC3;LIMK1;ARNT;PLK1;PSEN1;PSMD10;PTEN;RELA;SKP2;BRCA1;TGFBR1;TSPO;AIMP2;AXIN1;HDAC3;SQSTM1;BCL10;MTA1;COPS2	2.70564	8.72859e-09
GOBP_CD8_POSITIVE_ALPHA_BETA_T_CELL_ACTIVATION	LILRB1;PTPN22;CD274;BCL2;RUNX1;RUNX3	11.3667	9.08114e-09
GOBP_REGULATION_OF_LYMPHOCYTE_CHEMOTAXIS	KLRC4-KLRK1;CXCL13;KLRK1;CXCL10;CCL2;CCL5;CCL21;WNK1;ADAM17;CCR2	11.3667	9.08114e-09
GOBP_PROTEIN_LIPID_COMPLEX_SUBUNIT_ORGANIZATION	CETP;AGT;AGTR1;APOA2;APOE;LIPC;MPO;PLA2G2A;PON1;LIPG	6.68991	9.49365e-09
GOBP_POSITIVE_REGULATION_OF_RECEPTOR_SIGNALING_PATHWAY_VIA_STAT	CYP1B1;AGT;F2;F2R;GH1;IL4;IL6;IL7R;IL10;IL12B;HES5;LEP;NOTCH1;IL23A;PRL;PRLR;CCL5;TGFB1;TNF;TYK2;TSLP	6.68991	9.49365e-09
GOBP_NEGATIVE_REGULATION_OF_MAP_KINASE_ACTIVITY	AGT;DUSP1;NUP62;PTPN22;GBA;PDCD4;GSTP1;APOE;IL1B;LYN;PIK3CB;PPARG;SFRP1;SFRP2;BMP4;BMP7;UCHL1;HYAL2;ADIPOQ	5.84092	9.71766e-09
GOBP_REGULATION_OF_BIOLOGICAL_PROCESS_INVOLVED_IN_SYMBIOTIC_INTERACTION	F2RL1;HLA-DRB1;HMGB1;CXCL8;ITGAV;ARG1;LGALS1;LGALS9;LTF;CD74	5.84092	9.71766e-09
GOBP_POSITIVE_REGULATION_OF_IMMUNOGLOBULIN_PRODUCTION	PHB2;EPHB2;TBX21;IL2;IL4;IL6;IL10;IL13;MLH1;MSH2;PTPRC;IL21;STAT6;BTK;TGFB1;XBP1;IL33;CD86	6.21532	9.87453e-09
GOBP_NUCLEOSIDE_PHOSPHATE_BIOSYNTHETIC_PROCESS	ADA;MTCO2P12;PPARGC1A;PARP1;ENO1;ACACA;HPRT1;IL4;IDO1;NME1;NOS1;NOS2;NOS3;TREM2;PPARA;PPT1;TGFB1;TECR	2.50345	9.90498e-09
GOBP_REGULATION_OF_ORGANIC_ACID_TRANSPORT	AGT;EDN1;AKT1;IL1A;IL1B;ITGB1;ARG1;LEP;MIF;PPARA;PSEN1;RGS4;SSTR4;THBS1;TNF;TRH;SLC38A1;IRS2;PTGES	4.97567	9.96991e-09
GOBP_CARDIAC_MUSCLE_CELL_CONTRACTION	ABCC9;NEDD4L;GJA1;KCNQ1;PIK3CA;STC1	4.97567	9.96991e-09
GOBP_CELLULAR_AMINO_ACID_METABOLIC_PROCESS	CTH;SARDH;IDO1;ARG1;MIR21;MECP2;NOS1;NOS2;NOS3;QRSL1;SRR;SLC38A1	2.55145	9.98894e-09
GOBP_STEROL_TRANSPORT	CETP;CFTR;TTC39B;AKR1C1;EGF;SIRT1;ANXA2;APOA2;APOE;LEP;LIPC;MIR148A;MIR17;MIR27B;MIR33A;NFKB1;NFKBIA;TREM2;PON1;PPARG;RXRA;STAR;MIR33B;TSPO;ADIPOQ;LIPG;CD36	3.56441	1.04493e-08
GOBP_POSITIVE_REGULATION_OF_MYELOID_CELL_DIFFERENTIATION	CCR1;CREB1;MAPK14;CSF1;CSF3;IL34;ETS1;FOXO3;FOS;GATA2;HIF1A;HLA-DRB1;ID2;IFNG;IL12B;IL17A;INHBA;LIF;ARNT;MIR145;KITLG;IL23A;PF4;TREM2;MED1;PRKCA;RB1;STAT3;TGFB1;KLF10;TNF;TYROBP;DCSTAMP;RUNX1;ACVR1B;CD74	4.09178	1.05491e-08
GOBP_VASCULOGENESIS	YAP1;ADM;CTNNB1;HEY1;HOXA13;ITGAV;ITGB8;KDR;NOTCH1;NTRK2;PDGFRB;ACKR3;RASA1;TGFB1;VEGFA;WNT7A;WT1;NRP1	4.72095	1.13285e-08
GOBP_OUTFLOW_TRACT_MORPHOGENESIS	SEMA3C;CTNNB1;EDN1;EDNRA;FGFR2;PLXND1;GATA6;HIF1A;RBPJ;ILK;JUN;MIR17;MIR20A;SMAD4;NOTCH1;SFRP2;BMP4;BMP7;TGFB2;CLDN5;TWIST1;VEGFA;NRP1;HAND2;CDC42	4.72095	1.13285e-08
GOBP_CELLULAR_RESPONSE_TO_TOXIC_SUBSTANCE	ABCB6;ALB;GPX3;GPX4;GSTM1;GSTM2;GSTP1;GSTT1;HP;APOE;GSTK1;MIR21;MPO;NFE2L2;NOS3;PTGS2;BMP7;SOD1;SOD2;TNF;TXN;CAT;CD36;PTGES	3.72226	1.20189e-08
GOBP_MIDGUT_DEVELOPMENT		47.407	1.29718e-08
GOBP_POSITIVE_REGULATION_OF_PATTERN_RECOGNITION_RECEPTOR_SIGNALING_PATHWAY	F2RL1;PTPN22;HMGB1;TICAM2;USP17L2;LTF;NINJ1;TLR2;TLR3;TLR4;CD14	7.04252	1.29949e-08
GOBP_MONOCYTE_DIFFERENTIATION	CDK6;CSF1;CSF1R;CSF2;IL34;FOXP1;HLA-DRB1;JUN;MYC;PPARG;MED1;BMP4;VEGFA;DCSTAMP;CD74	8.44688	1.35754e-08
GOBP_NEGATIVE_REGULATION_OF_B_CELL_ACTIVATION	CTLA4;TNFRSF21;ID2;IL10;INHA;INHBA;LYN;ATM;FOXP3;PTEN;BCL6;SFRP1;BTK;TYROBP;CASP3	8.44688	1.35754e-08
GOBP_BASEMENT_MEMBRANE_ORGANIZATION	ITGB1;LAMB1	8.44688	1.35754e-08
GOBP_POSITIVE_REGULATION_OF_MORPHOGENESIS_OF_AN_EPITHELIUM	CTNNB1;AGT;AGTR2;EGF;FGF2;GATA3;GREM1;GDNF;GJA1;AR;LIF;MDK;PAX2;PIK3CD;WNT4;BMP4;SOX9;VEGFA;PAX8	8.44688	1.35754e-08
GOBP_AMINO_ACID_IMPORT_ACROSS_PLASMA_MEMBRANE	AGT;SLC7A8;ITGB1;ARG1;PSEN1;RGS4;SLC1A1;TNF;SLC38A1	6.47439	1.40641e-08
GOBP_EAR_MORPHOGENESIS	TSHZ1;CTHRC1;OSR2;DLX5;EDN1;EDNRA;EPHB2;FGF9;FGFR2;GATA2;GATA3;KCNQ1;PAX2;MAPK1;MAPK3;SOD1;SOX9;ZEB1;TWIST1;PAX8;WNT3A	3.68177	1.4857e-08
GOBP_ASTROCYTE_DIFFERENTIATION	CDK6;F2;ID2;IFNG;IFNGR1;IL1B;IL6;KRAS;HES5;LIF;MIR142;MIR181C;NOTCH1;NTRK3;TREM2;MAPK1;MAPK3;MAP2K1;PSEN1;SOX9;STAT3;TLR4;TNF;VIM	4.63804	1.49556e-08
GOBP_REGULATION_OF_T_CELL_CHEMOTAXIS	CXCL13;CXCL10;CCL5;CCL21;WNK1;ADAM17;CCR2	19.3421	1.56907e-08
GOBP_RESPONSE_TO_MACROPHAGE_COLONY_STIMULATING_FACTOR	CSF1;CSF1R;DOK1;MST1R;TREM2;SPP1;TLR2;TLR4;TNF;DCSTAMP	19.3421	1.56907e-08
GOBP_INNATE_IMMUNE_RESPONSE_ACTIVATING_SIGNAL_TRANSDUCTION	KLRC4-KLRK1;KLRK1;HCK;LYN;MBL2;PAK1;SRC;TYROBP	9.31459	1.57456e-08
GOBP_POSITIVE_REGULATION_OF_CELL_CYCLE	BCL2L11;CDK4;CDKN1B;PHB2;CKS1B;CCN2;CYP1A1;DRD2;EDN1;EGF;EGFR;EIF4EBP1;AIF1;AKT1;EZH2;FEN1;FGFR2;PLCB1;NUP62;POLDIP2;GLI1;TMOD3;ANXA1;HOXA13;APEX1;BIRC5;IGF1;IGF1R;IL1A;IL1B;IL10;INSR;MIR214;MDM2;MECP2;MNAT1;PDGFRB;WNT4;MED1;PRKCA;PSMD10;RB1;CCND1;SMOC2;SLC6A4;SOX15;SRC;BRCA2;ADAM17;TERT;TFDP1;TGFB2;TNF;XRCC3;BECN1;CCNB1;CDK1;CDC6;CDC42	2.32514	1.58774e-08
GOBP_NEGATIVE_REGULATION_OF_RESPONSE_TO_CYTOKINE_STIMULUS	ADAR;F2RL1;GSTP1;IL1RN;IL6;ARG1;MIR21;MIR27B;MMP12;TREM2;PPARG;PTPRC;CCL5;SLIT3;IL1R2;NLRC5;SLIT2;ADIPOQ	4.26288	1.67682e-08
GOBP_REGULATION_OF_T_CELL_MEDIATED_CYTOTOXICITY	LILRB1;HLA-B;HLA-DRB1;HLA-G;IL7R;IL12B;IL12RB1;KLRC1;IL23A;B2M;PTPRC;PVR	7.4803	1.72469e-08
GOBP_RESPONSE_TO_TUMOR_CELL	TXNIP;CD226;DAPK1;AHR;RBMS3;CD274;HLA-DRB1;HMGB1;HSPD1;IL12B;NOTCH1;PVR;RELA	7.4803	1.72469e-08
GOBP_NEGATIVE_REGULATION_OF_LEUKOCYTE_DEGRANULATION	LGALS9;CCR2	26.35	1.7332e-08
GOBP_NEGATIVE_REGULATION_OF_CELL_SUBSTRATE_ADHESION	CDKN2A;COL1A1;FBLN1;ANGPT2;MIR183;TACSTD2;MIR29C;MMP12;MMP14;NOTCH1;SERPINE1;PLG;PTEN;MIR503;RASA1;BCL6;CX3CL1;SRC;THBS1;ACTN4;FZD7;SEMA3E	5.28472	1.75027e-08
GOBP_REGULATION_OF_PROTEOLYSIS_INVOLVED_IN_PROTEIN_CATABOLIC_PROCESS	CEBPA;LRRK2;EGF;AKT1;RNF19A;GBA;CCDC22;GSK3B;APOE;MDM2;NFE2L2;PLK1;TREM2;PSEN1;PSMD10;PTEN;SMARCC1;BAG6;AXIN1;IL33	2.76888	1.77469e-08
GOBP_POSITIVE_REGULATION_OF_RESPONSE_TO_WOUNDING	HPSE;CPB2;CLDN4;CLDN3;HBEGF;F2;F2R;F3;MTOR;ANXA1;IGF1R;ITGB1;MIR21;MDK;NFE2L2;SERPINE1;PLAU;PLG;MIR451A;PTN;SMOC2;BRAF;THBS1;VTN;XBP1;CXCR4;CLDN1;CD36	4.78771	1.78323e-08
GOBP_REGULATION_OF_PROTEIN_LOCALIZATION_TO_CELL_PERIPHERY	CIB1;AGR2;CSK;EGFR;EPHA3;EPHB2;AKT1;GPER1;IFNG;AR;ITGB1;RHOG;LGALS3;MMP14;PLK1;TREM2;BCL2L1;ACTB;TGFB1;TNF;EZR;SQSTM1;WNT3A	3.6421	1.83145e-08
GOBP_HINDBRAIN_DEVELOPMENT	CRK;CTNNB1;EGF;AIF1;EPHB2;EZH2;FGF2;GATA2;GBA;GLI1;IGF1R;ITGB1;MDK;MECP2;MAP2K1;PSEN1;BCL2;SLC6A4;BMP7;SSTR1;HNF1B;TP53;WNT7A;XRCC1	3.31525	1.85632e-08
GOBP_NEGATIVE_REGULATION_OF_NERVOUS_SYSTEM_DEVELOPMENT	SEMA3C;CTNNB1;EPHB2;F2;KIFAP3;DKK1;DICER1;IL1B;IL6;HES5;MIR181C;MAP2;NOTCH1;NTRK3;TREM2;PSEN1;B2M;PTEN;SEMA6A;PTN;RB1;CCL11;GORASP1;BMP7;SPP1;TSPO;THY1;TLR2;TNF;TP53;WNT7A;NRP1;WNT3A;SEMA3E;CDH1	3.31525	1.85632e-08
GOBP_NEUROTRANSMITTER_TRANSPORT	PRRT2;LRRK2;CNR1;ADRA1A;DRD2;GDNF;GPER1;GSK3B;NR4A1;ITGB1;ITGB3;NOS1;PPT1;PRKCB;PSEN1;SLC1A1;SLC6A4;SNCG;BRAF;SYP;SYT1;WNT7A;SLC38A1	2.83971	1.86442e-08
GOBP_EXTRACELLULAR_MATRIX_ASSEMBLY	AGT;HAS1;IHH;LAMB1;LOX;SMAD3;NOTCH1;SOX9;TGFB1	6.78877	1.96127e-08
GOBP_RESPONSE_TO_TYPE_I_INTERFERON	ADAR;IFI27;IFIT1;IFNA1;IFNA13;JAK1;MIR21;MMP12;TYK2;NLRC5	4.55799	1.96407e-08
GOBP_REGULATION_OF_CALCIUM_MEDIATED_SIGNALING	ADA;CIB1;LRRK2;MTOR;GSK3B;IGF1;LHCGR;P2RX3;P2RX5;TREM2;PTBP1;TNF	4.55799	1.96407e-08
GOBP_POSITIVE_REGULATION_OF_CELL_MATRIX_ADHESION	CDK6;CIB1;CCR7;CSF1;POLDIP2;GSK3B;ITGB3;KDR;SMAD3;WNT4;ROCK1;CCL21;CCL25;CX3CL1;SDC4;SFRP1;TEK;THY1;UTRN;VEGFA;SKAP1;NRP1;CD36	5.87022	2.0356e-08
GOBP_EMBRYONIC_DIGIT_MORPHOGENESIS	BCL2L11;OSR2;CTNNB1;INTU;GLI3;HDAC1;HDAC2;HOXA11;IHH;SMAD4;NOTCH1;BAX;SFRP2;BMP4;TWIST1;WNT7A;HAND2	5.87022	2.0356e-08
GOBP_OVULATION_CYCLE_PROCESS	ESR1;FOXO3;SIRT1;FSHB;FSHR;NR5A1;MSTN;AMH;INHBA;KISS1;LEP;LHCGR;MMP2;NOS3;PDGFRA;PGR;RETN;BMPR1B;SLIT3;SRC;TGFB2;TGFB3;ZP3;CASP3;SLIT2	6.27217	2.0588e-08
GOBP_PROSTATE_GLAND_DEVELOPMENT	CDKN1B;CTNNB1;CYP19A1;ESR1;FGFR2;FKBP4;GLI1;GLI3;ANXA1;HOXA10;HOXA11;HOXA13;TNC;AR;MMP2;NOTCH1;SERPINF1;PRLR;PTEN;SFRP1;BMP4;BMP7;SOX9	6.27217	2.0588e-08
GOBP_REGULATION_OF_MORPHOGENESIS_OF_A_BRANCHING_STRUCTURE	PHB2;LRRK2;CTNNB1;AGT;AGTR2;ESR1;FGFR2;GREM1;GDNF;HGF;AR;TACSTD2;MDK;PAX2;PDGFA;SFRP1;BMP4;BMP7;SNAI2;SOX9;TNF;VEGFA;PAX8	6.27217	2.0588e-08
GOBP_POSITIVE_REGULATION_OF_ANION_TRANSPORT	CFTR;AGT;EDN1;IL1A;IL1B;ITGB1;MIF;PSEN1;SSTR4;TRH;SLC38A1;PTGES	6.27217	2.0588e-08
GOBP_CARDIAC_SEPTUM_MORPHOGENESIS	SEMA3C;FGFR2;HEY1;GATA6;CCN1;RBPJ;SMAD4;MDM2;NOS3;NOTCH1;BMP4;BMP7;SLIT3;TGFB2;TGFBR1;TP53;NRP1;SLIT2	4.9619	2.08815e-08
GOBP_REGULATION_OF_GLUCOSE_METABOLIC_PROCESS	PPARGC1A;AKT1;FOXO1;SIRT1;NR3C1;FOXA2;IGF1;IGFBP3;INSR;LEP;LEPR;MIR210;MST1;PPARA;SRC;TFF3;TP53;IRS2;ADIPOQ	3.93333	2.12467e-08
GOBP_NEURON_PROJECTION_EXTENSION	SEMA3C;CTNNB1;DPYSL2;EDN1;EDNRA;MEGF8;NEDD4L;FN1;GSK3B;APOE;ITGB1;L1CAM;LIMK1;MAP2;NRN1;SEMA6A;CXCL12;SLIT3;SYT1;VEGFA;CXCR4;NRP1;WNT3A;SLIT2;SEMA3E;CDH1	3.10655	2.14608e-08
GOBP_ANTIMICROBIAL_HUMORAL_RESPONSE	CXCL13;DEFB4A;F2;FGA;GATA6;ANG;CXCL1;CXCL8;IL17A;CXCL10;LGALS4;LTF;CXCL9;PF4;PF4V1;RARRES2;RNASE3;CXCL5;SLPI;CXCL14	3.60327	2.25154e-08
GOBP_POSITIVE_REGULATION_OF_TRANSPORTER_ACTIVITY	CFTR;EDN1;EDNRA;EPHB2;GSTM2;IFNG;P2RY6;TREM2;PON1;RXRA;CCL2;WNK1;TRPC6;CCR2;ACTN4;ADIPOQ	3.60327	2.25154e-08
GOBP_PROTEIN_ACYLATION	CTCF;PPARGC1A;BRD8;ERCC6;FOXO1;SIRT1;CHD5;GATA2;GATA3;GSK3B;HDAC2;LIF;MIR34A;SMAD4;MECP2;MUC1;NOS1;FOXP3;ACTB;SNAI2;BRCA1;BRCA2;TWIST1;BAG6;NAA16;NCOA1;CLOCK	2.55623	2.28812e-08
GOBP_LIPOPROTEIN_METABOLIC_PROCESS	GBA;APOA2;APOE;ITGAV;ITGB3;LEP;ATM;PPARA;PPT1;LIPG	3.42829	2.30199e-08
GOBP_LONG_CHAIN_FATTY_ACID_TRANSPORT	ACE;DRD2;AKT1;ANXA1;APOE;LHCGR;MIF;PLA2G2A;PPARG;SLC2A1;SSTR4;THBS1;IRS2;CD36	5.16716	2.39242e-08
GOBP_MESONEPHRIC_TUBULE_MORPHOGENESIS	CTNNB1;AGT;AGTR2;FGF1;FGF2;GATA3;GREM1;GDNF;GLI3;HOXA11;ILK;TACSTD2;SMAD4;MYC;PAX2;WNT4;BCL2;BMP4;SOX9;HNF1B;TCF21;VEGFA;WT1;PAX8;HS3ST3B1	5.16716	2.39242e-08
GOBP_DEFENSE_RESPONSE_TO_GRAM_POSITIVE_BACTERIUM	KLRC4-KLRK1;NOD1;CRP;DEFB4A;KLRK1;ANG;IL1B;IL6;IL7R;IL17A;IL18;LTA;MBL2;PLA2G2A;RARRES2;RNASE3;ADAM17;TLR2;TNF;CD36	3.68622	2.41402e-08
GOBP_POSITIVE_REGULATION_OF_LYMPHOCYTE_CHEMOTAXIS	CXCL13;CCL5;CCL21;WNK1;ADAM17;CCR2	14.0665	2.50636e-08
GOBP_NEGATIVE_REGULATION_OF_FIBROBLAST_PROLIFERATION	GSTP1;LTA;MYC;BAX;SFRP1;SOD2;TP53	8.79691	2.65403e-08
GOBP_REGULATION_OF_NATURAL_KILLER_CELL_ACTIVATION	RASGRP1;FCGR3A;PTPN22;IL12B;IL15;IL18;KLRC1;LEP;IL23A;AXL;TYK2;TYROBP	7.18126	2.66252e-08
GOBP_POSITIVE_REGULATION_OF_ACTIN_FILAMENT_BUNDLE_ASSEMBLY	CCN2;MTOR;RHOC;LIMK1;SMAD3;PAK1;WNT4;CX3CL1;SDC4;SFRP1;BRAF;TACR1;TGFB3;TGFBR1;NRP1;CD47;CDC42	5.41345	2.66879e-08
GOBP_POSITIVE_REGULATION_OF_WOUND_HEALING	HPSE;CPB2;CLDN4;CLDN3;HBEGF;F2;F2R;F3;MTOR;ANXA1;ITGB1;NFE2L2;SERPINE1;PLAU;PLG;MIR451A;SMOC2;THBS1;VTN;XBP1;CXCR4;CLDN1;CD36	5.41345	2.66879e-08
GOBP_STEM_CELL_DEVELOPMENT	PDCD6;SEMA3C;EDN1;EDNRA;FGF2;FN1;GDNF;HIF1A;KITLG;MAPK1;MAPK3;SEMA6A;PTPRC;BCL2;BMP4;BMP7;SNAI2;SOX9;TWIST1;WNT7A;NRP1;HAND2;SEMA3E;CDC42	4.29656	2.69153e-08
GOBP_REGULATION_OF_PROTEIN_TYROSINE_KINASE_ACTIVITY	CSF1R;IL34;ADRA1A;ACE;AGT;HBEGF;EGF;EGFR;ERCC6;GREM1;ITGB3;AREG;ERRFI1;PSEN1;PTPRC;CCL5;SHC1;SRC;ADAM17;THY1;HYAL2;WNT3A	4.13922	2.74384e-08
GOBP_SUPEROXIDE_METABOLIC_PROCESS	CRP;AGT;EDN1;F2RL1;FPR2;GSTP1;ITGAM;MIR21;MIR27B;MPO;NFE2L2;NOS2;NOS3;SLC1A1;BMP7;SOD1;SOD2;TGFB1;TYROBP;CD36	4.86256	2.79853e-08
GOBP_INTERFERON_BETA_PRODUCTION	LILRB1;SIRPA;TLR2;TLR3;TLR4	5.71079	2.8799e-08
GOBP_REGULATION_OF_KERATINOCYTE_PROLIFERATION	CDH3;YAP1;FGFR2;INTU;AREG;MIR21;MDK;MED1;SNAI2;KLF9;ZEB1;VDR;ZFP36	6.55507	2.92023e-08
GOBP_HOMEOSTASIS_OF_NUMBER_OF_CELLS_WITHIN_A_TISSUE	CSF1;F2R;GATA2;IL7;KRAS;NOS3;NOTCH1;BAX;BCL2;SOX9	9.85062	2.97001e-08
GOBP_CYTOSKELETON_DEPENDENT_INTRACELLULAR_TRANSPORT	RASGRP1;KIFAP3;INTU;HIF1A;MAP2;SYBU;SOD1;UCHL1;ACTN4;CDC42	2.82655	2.97454e-08
GOBP_CYTOLYSIS	NINJ1;PLA2G2A;TGFB1;C5;C9	11.4316	2.97476e-08
GOBP_NEGATIVE_REGULATION_OF_INTERLEUKIN_10_PRODUCTION	LILRB1;TNFRSF21;CD274;IL12B;IDO1;FOXP3;IL23A;BTK;TYROBP	11.4316	2.97476e-08
GOBP_REGULATION_OF_DNA_BINDING	PARP1;CTNNB1;EGF;ERCC2;HEY1;GATA3;HDAC2;HMGB1;IFNG;IGF1;ITGA2;JUN;LIF;MMP9;NFKBIA;NGF;NME1;PPARG;MAPK8;PSEN1;RB1;TGFB1;TWIST1;TXN;HMGA2;HAND2	3.64519	2.97689e-08
GOBP_POSITIVE_REGULATION_OF_TRANSMEMBRANE_RECEPTOR_PROTEIN_SERINE_THREONINE_KINASE_SIGNALING_PATHWAY	PARP1;FGF9;GATA6;MSTN;CCN1;RBPJ;ILK;INHA;INHBA;KDR;HES5;MIR20A;MIR21;SMAD2;SMAD4;NOTCH1;PPARG;BMP4;BMP7;ADAM17;TGFB1;TGFB1I1;TGFB2;TGFB3;LEFTY2;TGFBR1;THBS1;AXIN1;ACVR1B;ACVR2B;GDF3	3.64519	2.97689e-08
GOBP_SIGNAL_TRANSDUCTION_BY_P53_CLASS_MEDIATOR	CDKN1A;CDKN1B;NDRG1;DDX5;AKT1;FOXM1;FOXO3;SIRT1;MTOR;CHD5;GREM1;ANKRD1;MIR21;MDM2;MIF;MSH2;MUC1;MYC;ATM;PSMD10;BAX;BCL2;SNAI2;SNAI1;BRCA2;TP53;TWIST1;BAG6;RNF34;USP10;CD44;CD74	3.06042	3.00163e-08
GOBP_MAINTENANCE_OF_CELL_NUMBER	YAP1;MMP24;CTNNB1;ELAVL1;ESRRB;EZH2;FANCD2;ZHX2;FOXO1;FOXO3;GATA2;HDAC1;HDAC2;IGF1;RBPJ;HES5;LIF;MIR145;MYC;NOTCH1;PAX2;POU5F1;SALL4;PTN;RAF1;ACTB;SFRP1;BMP7;SMARCC1;SOX2;SOX9;BRAF;STAT3;HNF1B;KLF10;TPT1;WNT7A;PAX8;NANOG;TET1;HMGA2;ARID1A;FZD7;MED14;MED17	3.00583	3.04849e-08
GOBP_SIGNAL_TRANSDUCTION_IN_ABSENCE_OF_LIGAND	BCL2L11;CSF2;AKT1;FOXO3;GDNF;GSK3B;FAS;IL1A;IL1B;IL2;IL4;IL7;INHBA;ITGAV;KITLG;PF4;PPP2R1A;BAX;BCL2;BCL2L1;CX3CL1;SNAI2;TERT;TNF	5.05472	3.24689e-08
GOBP_PROTEIN_CONTAINING_COMPLEX_DISASSEMBLY	CIB1;CFL1;F2RL1;LMOD1;GBA;GSK3B;TMOD3;HMGA1;IGF1R;INSR;STMN1;MYC;VTA1;PIK3CA;SMARCC1;TNF;MAP1LC3B;ARID1A;BECN1	2.63791	3.2787e-08
GOBP_FEEDING_BEHAVIOR	CNR1;ACE;AGRP;DRD2;AGT;FOS;IAPP;LEP;LEPR;NTRK2;OPRM1;OXTR;RETN;REN;STAT3;BRS3;TACR1;TRH;UCHL1;UCN;CALCA;HAND2	3.83494	3.33056e-08
GOBP_REGULATION_OF_PLASMA_LIPOPROTEIN_PARTICLE_LEVELS	CETP;CSK;AGT;AGTR1;MYLIP;ANXA2;APOA2;APOE;LIPC;MIR148A;MIR17;MIR27B;MIR33A;MPO;PLA2G2A;TREM2;PON1;MIR33B;ADIPOQ;LIPG;CD36	4.40592	3.33638e-08
GOBP_REGULATION_OF_ACTIN_FILAMENT_LENGTH	CCR7;CSF3;F2RL1;ALOX15;MTOR;LMOD1;TMOD3;HCK;MIR214;PIK3CA;RASA1;CCL11;CCL21;CXCL12;ARHGAP28;SLIT2	3.16017	3.35155e-08
GOBP_REGULATION_OF_STRIATED_MUSCLE_CONTRACTION	ADRA1A;CCN2;GSTM2;NR4A1;KCNQ1;MIR200C;NOS1;PIK3CG;STC1;UCN	4.08004	3.48867e-08
GOBP_BONE_MORPHOGENESIS	CDX1;OSR2;COL1A1;DLX5;MEGF8;FGFR2;GLI3;HOXA11;IHH;LTF;MMP13;MMP14;RARB;BMP4;BMPR1B;SOX9;STC1;TGFB3;TWIST1;SERPINH1	4.08004	3.48867e-08
GOBP_SIGNALING_RECEPTOR_LIGAND_PRECURSOR_PROCESSING	ACE;DPP4;MME;REN	7.67863	3.49031e-08
GOBP_NEGATIVE_REGULATION_OF_PROTEIN_LOCALIZATION	LRRK2;CSK;DRD2;F2R;FOXO1;ASTN2;NEDD4L;ANGPT1;GSK3B;APOE;IL1B;IL12B;USP17L2;MIR148A;MIR17;MIR30C1;CD200;OPRM1;PSMD9;BCL2L1;SFRP1;TERF1;TGFB1;TXN;ADIPOQ;CD36	2.84821	3.52041e-08
GOBP_CELLULAR_RESPONSE_TO_RADIATION	CDKN1A;YAP1;PARP1;MAPK14;EGR1;ERCC1;SIRT1;GATA3;H2AX;AQP1;MIR21;MDM2;MME;MMP1;MMP2;MMP3;MMP9;MYC;ATM;PCNA;POLD1;PTGS2;BAX;BCL2L1;SAG;SFRP1;SFRP2;SNAI2;BRCA1;BRCA2;TIMP1;TP53;HYAL2;CLOCK	2.93514	3.5902e-08
[truncated: 563 more rows]
