# Supplementary material for: Molecular Mechanisms of Endometriosis Revealed Using Omics Data
Source: Biomedicines. 2023 Aug 7;11(8):2210. doi: 10.3390/biomedicines11082210 (PMC10452455; doi:10.3390/biomedicines11082210)
Supplement: Supplementary file 1 [file biomedicines-11-02210-s001.zip › Supplementary Table S9.xlsx]

## Sheet: trans.genes.kegg.sig.re
KEGG pathways	genes	OR	P value
KEGG_CYTOKINE_CYTOKINE_RECEPTOR_INTERACTION	CCL26;HGF;TNFSF12;TNFRSF8;TNFSF10;CCL2;TNFSF8;CCL3;TNFSF14;IL21R;CCL5;CCL13;CCL11;CCL8;CCL7;TNFRSF17;CCL15;CD27;CCL18;CCL20;CCL19;CCL21;CCL23;CCL22;CCL16;CSF1R;CSF1;PRLR;PRL;TNFRSF14;CSF2RB;TGFB2;TGFB1;CX3CL1;XCL1;CXCL5;CXCL6;CCR2;TGFBR2;TGFBR1;TGFB3;CSF3R;IL17B;CXCL12;CCR10;XCR1;CXCL10;INHBB;INHBC;INHBA;TNFRSF19;IL1R2;KIT;CD70;TNFRSF11B;LEPR;CXCR6;LTA;IL17A;IL18;TNFRSF9;IL15RA;IL15;CXCL13;TNFRSF…	11.2931	1.82475e-71
KEGG_HEMATOPOIETIC_CELL_LINEAGE	GP1BA;TNF;ITGAM;CD34;CD36;ITGA4;ITGA3;ITGA5;IL1R2;IL7R;MME;IL11RA;CD19;MS4A1;TFRC;CD22;KIT;CR2;CD14;CR1;EPOR;IL11;HLA-DRB4;CD4;CSF1R;CSF1;HLA-DRB3;CD59;CD9;CD8A;CD8B;CD44;CD7;CD5;CD55;IL1B;IL1R1;IL2RA;ITGA6;IL6R;ITGA2;CSF3R;IL7;CD37;CD2;CD3D;CD3E;CD38;ANPEP;CD1D;IL4;IL4R;IL6;HLA-DRB1;HLA-DRA	18.3229	1.10045e-36		KEGG: Koyto Encyclopedia of Genes and Genomics
KEGG_PATHWAYS_IN_CANCER	STAT3;STAT1;HGF;FN1;PML;FZD7;PTGS2;HIF1A;WNT2B;JAK1;WNT10B;LAMC2;LAMC1;AXIN2;STAT5A;LAMA4;LAMA5;NFKB2;CTNNA1;NFKBIA;MYC;CSF1R;NCOA4;TGFB2;TRAF3;TGFB1;TGFBR2;TRAF1;TGFBR1;TGFB3;CSF3R;BCR;PAX8;CASP8;FGF7;FGF2;NOS2;BAX;KIT;CASP3;FGFR1;FGF11;FGF12;WNT4;SMAD3;RUNX1;HRAS;WNT2;WNT5A;CTNNB1;FZD10;FZD5;TCF7L1;MITF;FOS;LAMA1;ITGA3;PDGFRB;MMP2;BRCA2;MMP1;COL4A2;MMP9;MLH1;IKBKB;ARNT2;ITGAV;ITGB1;AKT3;DAPK1;R…	5.43668	1.47473e-36		Gene: common genes between input genes and genes of a gene set
KEGG_CHEMOKINE_SIGNALING_PATHWAY	CCL26;STAT3;STAT1;STAT2;CCL2;GNB4;CCL3;CCL5;CX3CR1;CCL13;CCL11;CCL8;CCL7;CCL3L3;CXCL14;CCL15;IKBKB;JAK3;JAK2;CCL18;CCL20;CCL19;AKT3;CCL21;CCL23;TIAM1;CCL22;NFKBIA;CCL16;RELA;SHC3;GNG4;GNG11;CX3CL1;GNGT2;XCL1;CXCL5;ADCY3;GNG2;ADCY2;CXCL6;CCR2;FOXO3;BCAR1;PRKACB;CXCL12;CCR10;XCR1;CXCL10;PLCB1;ADCY9;CXCL1;ADCY5;WAS;CXCR2;CXCR1;RAC2;RASGRP2;CXCR6;CCR5;CCR6;CCR7;CCR8;CXCL16;SOS1;MAPK1;HRAS;CCR1;CXCL13…	7.52715	1.14515e-33		OR: odds ratio
KEGG_CELL_ADHESION_MOLECULES_CAMS	CDH5;JAM3;CDH3;CD80;CD86;CD28;CD274;PDCD1LG2;ITGA9;ITGAL;NRCAM;ITGAM;CD34;ICOSLG;CADM3;ITGA4;ICOS;PECAM1;CD22;SELL;VCAM1;ITGAV;ITGB1;ITGB2;CDH2;HLA-DRB4;CD4;CNTN1;HLA-DRB3;NRXN3;CD8A;CD8B;CD6;ITGB8;VCAN;HLA-DPA1;HLA-DPB1;HLA-DQA1;HLA-DQB1;NRXN2;CD2;HLA-DRB1;HLA-DRA;HLA-DOB;CLDN10;ICAM2;ICAM3;CLDN6;CLDN1;ICAM1;HLA-C;HLA-DMA;PDCD1;PTPRF;CD99;NCAM2;NCAM1;CD58;CLDN11;ITGA6;CD40LG;CD40;CLDN14	9.61131	1.11183e-31
KEGG_LEISHMANIA_INFECTION	HLA-DOB;STAT1;TNF;ITGAM;ITGA4;FCGR2C;HLA-DMA;PTPN6;MAPK11;NCF4;PTGS2;MAPK13;IL12A;NOS2;JAK1;JAK2;ITGB1;ITGB2;CR1;FCGR2A;NFKBIA;MAPK1;HLA-DRB4;HLA-DRB3;RELA;TGFB2;TGFB1;IFNGR1;IL1B;IRAK1;TGFB3;HLA-DPA1;HLA-DPB1;HLA-DQA1;HLA-DQB1;C3;TLR4;IL4;TLR2;FOS;HLA-DRB1;HLA-DRA	14.881	2.52273e-26
KEGG_TOLL_LIKE_RECEPTOR_SIGNALING_PATHWAY	CD80;CD86;STAT1;TLR9;CCL3;CCL5;IKBKB;LY96;MAP3K8;CD14;CTSK;AKT3;SPP1;IKBKE;NFKBIA;TLR5;TIRAP;RELA;TRAF3;TOLLIP;TLR7;TLR8;CXCL10;CASP8;TICAM1;TNF;IFNA2;FADD;MAPK11;IL12A;MAPK13;MAPK1;IRF3;MAPK8;IFNB1;IFNAR1;IFNAR2;IL1B;IRAK1;CD40;CXCL9;PIK3CD;TLR3;TLR4;TLR1;FOS;TLR2;IRF5;IL6;PIK3R1	10.2372	2.56037e-26
KEGG_NATURAL_KILLER_CELL_MEDIATED_CYTOTOXICITY	ZAP70;TNFSF10;ITGAL;FCER1G;PRF1;ITGB2;GZMB;NFAT5;NCR1;NFATC3;SHC3;CD247;NFATC2;NFATC1;LCK;KLRC3;KLRD1;KLRC1;KLRC2;TNF;ICAM2;IFNA2;ICAM1;HLA-C;PTPN6;RAC2;SH3BP2;KIR2DS5;RAC3;KIR3DL1;KIR3DL2;CASP3;SOS1;MAPK1;KIR2DL1;HRAS;KIR2DS4;CD48;KIR2DS3;KIR2DL4;KIR2DS1;KIR2DL2;IFNGR1;SYK;IFNB1;ARAF;IFNAR1;TNFRSF10C;IFNAR2;NCR3;CD244;FAS;PIK3CD;FYN;PIK3R1;SH2D1A	7.36726	2.45577e-24
KEGG_JAK_STAT_SIGNALING_PATHWAY	STAT3;STAT4;STAT1;STAT2;IL21R;SOCS5;JAK1;JAK3;JAK2;AKT3;STAT5A;MYC;IL24;IL13RA2;PRLR;PRL;CSF2RB;IL22RA2;CSF3R;CCND2;CCND3;IFNA2;SOCS2;CISH;PTPN6;IL9;IL7R;IL12RB1;IL13;IL11RA;IL12A;LEPR;IL26;IL10RA;SOS1;EPOR;IL11;IL2RG;IL2RB;IL15RA;IL15;IFNGR1;IFNB1;IFNAR1;IFNAR2;IL20RB;IL2RA;IL6R;IL6ST;IL7;GHR;PIK3CD;LIF;IL4;IL4R;SOCS7;PIK3R1;IL6	6.37227	7.6796e-23
KEGG_ANTIGEN_PROCESSING_AND_PRESENTATION	HLA-DOB;KLRC3;KLRD1;KLRC1;KLRC2;RFX5;IFNA2;PSME3;CTSS;HLA-C;HLA-DMA;KIR2DS5;KIR3DL1;KIR3DL2;CREB1;CD74;CIITA;HSPA6;HLA-DRB4;CD4;KIR2DL1;LTA;KIR3DL3;HLA-DRB3;KIR2DS4;TAPBP;CD8A;CD8B;TAP1;KIR2DS3;KIR2DL4;CANX;KIR2DS1;KIR2DL2;HSP90AA1;NFYA;HLA-DPA1;HLA-DPB1;HLA-DQA1;HLA-DQB1;B2M;HLA-DRB1;HLA-DRA	10.1561	9.09292e-23
KEGG_COMPLEMENT_AND_COAGULATION_CASCADES	MBL2;F3;PLAUR;F10;TFPI;CR2;MASP1;CR1;F13A1;C8A;C7;CD59;SERPINA5;CD55;C6;C5;BDKRB1;C4BPB;C4BPA;BDKRB2;CFH;CFB;CPB2;CD46;PROS1;SERPINE1;C2;C1S;C3AR1;C3;C1QB;CFD;C1QA;C1R;CFI;SERPING1;MASP2	12.2733	1.30384e-21
KEGG_MAPK_SIGNALING_PATHWAY	JUND;GADD45B;MAP3K3;MAP3K8;CD14;DUSP16;NFKB2;MYC;TGFB2;DUSP1;DUSP2;TGFB1;BDNF;TGFBR2;DUSP7;TGFBR1;TGFB3;PLA2G4E;DUSP4;NF1;PLA2G12A;NFATC2;FGF7;FGF2;PTPN5;IL1R2;MAPK11;RASGRP2;PLA2G2A;PLA2G4A;PLA2G5;MAPK13;MAPK8IP3;CASP3;FGFR1;RPS6KA2;FGF11;FGF12;HRAS;ATF4;FOS;PDGFRB;JMJD7-PLA2G4B;MAP4K3;PLA2G2E;PLA2G10;IKBKB;AKT3;GADD45G;RELA;HSPB1;PTPRR;GADD45A;NGF;PDGFB;PRKACB;CACNB2;TNF;PAK2;RAC2;CACNA1D;RAC3;…	4.25172	5.35702e-21
KEGG_VIRAL_MYOCARDITIS	CASP8;HLA-DOB;CD80;CD86;CD28;ITGAL;ICAM1;CXADR;HLA-C;MYH14;HLA-DMA;RAC2;RAC3;ABL2;CASP3;PRF1;ITGB2;HLA-DRB4;HLA-DRB3;DAG1;CD55;ACTB;CD40LG;HLA-DPA1;CD40;HLA-DPB1;HLA-DQA1;HLA-DQB1;CAV1;CYCS;MYH11;FYN;MYH10;HLA-DRB1;HLA-DRA	10.6084	3.22848e-19
KEGG_INTESTINAL_IMMUNE_NETWORK_FOR_IGA_PRODUCTION	HLA-DRB4;HLA-DOB;HLA-DRB3;CD80;CD86;CD28;TNFSF13B;IL15RA;IL15;ICOSLG;ITGA4;TGFB1;ICOS;TNFRSF17;HLA-DMA;PIGR;CD40LG;HLA-DPA1;CD40;HLA-DPB1;HLA-DQA1;HLA-DQB1;TNFRSF13B;CXCL12;CCR10;IL4;IL6;HLA-DRB1;HLA-DRA	16.1697	3.31002e-19
KEGG_NOD_LIKE_RECEPTOR_SIGNALING_PATHWAY	CASP8;CXCL1;TNF;CCL2;CCL5;NOD1;CCL13;CCL11;CCL8;CCL7;MEFV;MAPK11;MAPK13;IKBKB;NOD2;CASP1;TNFAIP3;SUGT1;PSTPIP1;NFKBIA;MAPK1;CARD9;MAPK8;IL18;RELA;HSP90AA1;PYCARD;NLRC4;IL1B;NLRP3;CXCL2;IL6	11.3079	3.1612e-18
KEGG_GRAFT_VERSUS_HOST_DISEASE	HLA-DRB4;KIR2DL1;HLA-DOB;HLA-DRB3;CD80;CD86;KLRD1;KLRC1;CD28;TNF;KIR2DL2;HLA-C;IL1B;HLA-DMA;HLA-DPA1;HLA-DPB1;HLA-DQA1;KIR3DL1;KIR3DL2;HLA-DQB1;PRF1;FAS;GZMB;IL6;HLA-DRB1;HLA-DRA	18.3611	4.03323e-18
KEGG_PRIMARY_IMMUNODEFICIENCY	ZAP70;CD4;IL2RG;RFX5;CD8A;CD8B;TAP1;ICOS;IL7R;ADA;CD40LG;CD40;BTK;CD19;RAG1;CD3D;CD3E;AIRE;CD79A;TNFRSF13B;JAK3;CIITA;LCK	20.2806	1.07536e-16
KEGG_FOCAL_ADHESION	HGF;FN1;LAMC2;LAMC1;LAMA4;LAMA5;THBS2;THBS1;VTN;PDGFD;RAPGEF1;HRAS;CTNNB1;ACTB;ROCK2;TNC;CAV2;CAV1;COL5A3;COL6A2;COL6A3;COL6A1;LAMA1;ITGA9;ITGA4;ITGA3;ITGA5;COL5A1;PDGFRB;COL3A1;COL4A2;ITGAV;ITGB1;AKT3;SPP1;COL1A2;SHC3;ITGB8;BCL2;PDGFB;BCAR1;CCND2;CCND3;PAK3;PAK2;RAC2;RAC3;ARHGAP35;SOS1;MAPK1;MAPK8;ITGA6;ITGA2;SRC;PIK3CD;FYN;PIK3R1	4.30283	2.29744e-16
KEGG_NEUROACTIVE_LIGAND_RECEPTOR_INTERACTION	PTGFR;PTGER2;PTGER4;PTGER3;ADRB3;ADRA2A;TACR2;GPR35;THRB;THRA;PTH2R;PTH1R;PRSS3;PRSS2;CGA;RXFP1;PRLR;PRL;BDKRB1;BDKRB2;NPBWR1;C3AR1;TSHB;GRIA4;MC1R;S1PR5;LEPR;GABRD;GABRE;ADORA1;ADORA2B;GIPR;HTR2B;GABRA5;AVPR1A;GABRA2;PTGDR;GABBR1;GHR;LPAR3;PTAFR;ADORA3;HRH1;MAS1;CRHR2;GLRB;CCKAR;F2RL1;F2RL2;S1PR1;LPAR1;S1PR3;EDNRA;CTSG;HTR1A;GZMA;EDNRB;CHRM2;TAAR2;GRIK5;GRIN2C;GRIN2D;NR3C1;LTB4R;CHRNB3;S1PR4;TBX…	3.62374	2.55763e-16
KEGG_P53_SIGNALING_PATHWAY	CASP8;TSC2;CDK1;GADD45B;IGFBP3;TP73;PPM1D;BAX;CASP3;PMAIP1;PERP;GADD45G;ATM;CDKN2A;RRM2;CDKN1A;GADD45A;CDK2;CHEK1;CDK4;SERPINE1;TP53;CCNE2;FAS;CDK6;CYCS;CCND2;CCNB1;THBS1;CCNG2;CCND3	8.87813	9.7261e-16
KEGG_ASTHMA	HLA-DRB4;HLA-DOB;HLA-DRB3;TNF;CCL11;FCER1G;FCER1A;HLA-DMA;IL9;CD40LG;HLA-DPA1;CD40;HLA-DPB1;IL13;HLA-DQA1;HLA-DQB1;PRG2;IL4;HLA-DRB1;HLA-DRA	21.1437	7.17909e-15
KEGG_ALLOGRAFT_REJECTION	HLA-DRB4;HLA-DOB;HLA-DRB3;CD80;CD86;CD28;TNF;HLA-C;HLA-DMA;CD40LG;HLA-DPA1;CD40;HLA-DPB1;HLA-DQA1;IL12A;HLA-DQB1;PRF1;FAS;GZMB;IL4;HLA-DRB1;HLA-DRA	15.5115	1.0818e-14
KEGG_T_CELL_RECEPTOR_SIGNALING_PATHWAY	ZAP70;CD28;ICOS;IKBKB;MAP3K8;AKT3;NFAT5;NFKBIA;CD4;NFATC3;RELA;CD8A;CD8B;CD247;CD3D;CD3E;NFATC2;NFATC1;LCK;PAK3;TNF;PAK2;PTPN6;PDCD1;MAPK11;PRKCQ;MAPK13;SOS1;MAPK1;HRAS;CD40LG;CDK4;PIK3CD;BCL10;IL4;FYN;FOS;PIK3R1	5.75776	1.81602e-14
KEGG_ECM_RECEPTOR_INTERACTION	GP1BA;COL6A2;COL6A3;COL6A1;LAMA1;FN1;ITGA9;CD36;VTN;ITGA4;ITGA3;ITGA5;COL5A1;COL3A1;COL4A2;LAMC2;ITGAV;ITGB1;SPP1;LAMC1;LAMA4;LAMA5;COL1A2;CD47;CD44;DAG1;ITGB8;ITGA6;ITGA2;TNC;COL5A3;THBS2;THBS1	6.85925	2.38398e-14
KEGG_SMALL_CELL_LUNG_CANCER	LAMA1;FN1;ITGA3;COL4A2;PTGS2;NOS2;IKBKB;SKP2;ITGAV;LAMC2;ITGB1;AKT3;LAMC1;LAMA4;LAMA5;NFKBIA;MYC;RELA;TRAF3;TRAF1;ITGA6;ITGA2;TRAF4;BCL2;CDK2;CDK4;TP53;E2F3;CCNE2;CYCS;CDK6;PIK3CD;PIK3R1	6.85925	2.38398e-14
KEGG_TYPE_I_DIABETES_MELLITUS	HLA-DRB4;LTA;HLA-DOB;HLA-DRB3;CD80;CD86;CD28;TNF;HLA-C;IL1B;HLA-DMA;HLA-DPA1;HLA-DPB1;HLA-DQA1;IL12A;CPE;HLA-DQB1;GAD2;PRF1;FAS;GZMB;HLA-DRB1;HLA-DRA	12.165	6.2141e-14
KEGG_VASCULAR_SMOOTH_MUSCLE_CONTRACTION	CALD1;JMJD7-PLA2G4B;PLA2G2E;PLA2G10;EDNRA;GNA13;GUCY1A2;ADCY3;MYL6;ADCY2;PLA2G4E;PRKACB;GNAS;PLA2G12A;MYH11;PLCB1;ADCY9;PPP1R12B;ADCY5;KCNMB1;PRKCE;PLA2G2A;CACNA1D;PLA2G4A;PRKCQ;PLA2G5;CACNA1C;ACTG2;MAPK1;RAMP1;ACTA2;RAMP2;ITPR1;ADORA2B;ARAF;AVPR1A;ROCK2;KCNMB4	5.23414	1.79715e-13
KEGG_COLORECTAL_CANCER	RAC2;RAC3;MLH1;BAX;CASP3;AKT3;AXIN2;SMAD3;MYC;TCF7L2;MAPK1;MAPK8;APPL1;CTNNB1;TGFB2;TGFB1;ARAF;TGFBR2;TGFBR1;TGFB3;BCL2;TCF7L1;TP53;CYCS;PIK3CD;FOS;PIK3R1	8.16611	2.71025e-13
KEGG_REGULATION_OF_ACTIN_CYTOSKELETON	FN1;ENAH;CD14;TIAM1;CFL1;BDKRB1;BDKRB2;MYH10;FGF7;WAS;PDGFD;FGF2;FGFR1;FGF11;FGF12;HRAS;ACTB;ROCK2;MSN;ITGA9;ITGAL;ITGAM;ITGAE;ITGA4;ITGA3;ITGA5;MYH14;PDGFRB;WASF2;SLC9A1;DIAPH3;PIP5K1B;ITGAV;ITGB1;ITGB2;GNA13;CHRM2;ITGB8;PDGFB;BCAR1;EZR;PAK3;PAK2;RAC2;RAC3;ARHGAP35;SOS1;MAPK1;GSN;ARAF;ITGA6;ITGA2;PIK3CD;PIK3R1	3.63309	3.56459e-13
KEGG_PRION_DISEASES	NCAM2;EGR1;NCAM1;NOTCH1;C6;CCL5;C5;IL1B;STIP1;BAX;PRKACB;PRNP;C1QB;C1QA;LAMC1;FYN;C8A;C7;IL6;MAPK1	14.0945	5.05739e-13
KEGG_B_CELL_RECEPTOR_SIGNALING_PATHWAY	PTPN6;RAC2;RAC3;CD19;CD22;CD72;IKBKB;CD79A;CR2;CD79B;AKT3;NFAT5;NFKBIA;SOS1;FCGR2B;MAPK1;HRAS;IFITM1;RELA;NFATC3;SYK;BTK;LILRB3;PIK3CD;BCL10;NFATC2;FOS;NFATC1;PIK3R1	6.67445	1.40595e-12
KEGG_DILATED_CARDIOMYOPATHY	CACNB2;ADCY9;ADCY5;TNF;ITGA9;ATP2A2;ITGA4;ITGA3;ITGA5;CACNA1D;SLC8A1;CACNA1C;TNNC1;ITGAV;ITGB1;ACTC1;MYBPC3;DAG1;PLN;TGFB2;TNNT2;TGFB1;ADCY3;ADCY2;ITGB8;ACTB;ITGA6;TGFB3;ITGA2;PRKACB;GNAS;DES	5.84542	1.47671e-12
KEGG_CHRONIC_MYELOID_LEUKEMIA	IKBKB;AKT3;SMAD3;STAT5A;NFKBIA;SOS1;MYC;MAPK1;RUNX1;HRAS;RELA;CDKN2A;SHC3;CDKN1A;TGFB2;TGFB1;ARAF;TGFBR2;TGFBR1;TGFB3;CDK4;TP53;E2F3;CDK6;PIK3CD;HDAC1;BCR;PIK3R1	6.58611	4.29392e-12
KEGG_LEUKOCYTE_TRANSENDOTHELIAL_MIGRATION	CDH5;JAM3;ITGAL;ITGAM;ITGA4;MMP2;NCF4;MMP9;PECAM1;VCAM1;ITGB1;THY1;ITGB2;CTNNA1;RAPGEF3;BCAR1;EZR;CXCL12;CLDN10;CLDN6;CLDN1;ICAM1;RAC2;MAPK11;MAPK13;CD99;ARHGAP35;CTNNB1;CLDN11;ACTB;ROCK2;CLDN14;MSN;PIK3CD;CYBB;PIK3R1	4.83034	4.69548e-12
KEGG_AUTOIMMUNE_THYROID_DISEASE	HLA-DOB;CD80;CD86;CD28;IFNA2;TSHB;HLA-C;HLA-DMA;CGA;PRF1;GZMB;HLA-DRB4;HLA-DRB3;CD40LG;HLA-DPA1;CD40;HLA-DPB1;HLA-DQA1;HLA-DQB1;FAS;IL4;HLA-DRB1;HLA-DRA	8.38783	1.0525e-11
KEGG_CALCIUM_SIGNALING_PATHWAY	PTGFR;BST1;PTGER3;ATP2A1;ADRB3;ATP2A2;TACR2;SPHK1;CCKAR;PDGFRB;SLC8A1;EDNRA;EDNRB;GNA15;CHRM2;PLN;BDKRB1;ADCY3;ADCY2;BDKRB2;GNA14;PRKACB;GNAS;SLC25A4;ATP2B2;ATP2B3;PLCB1;ADCY9;PDE1A;ERBB3;NOS3;CACNA1D;GRIN2C;GRIN2D;NOS2;CACNA1C;NOS1;TNNC1;ADORA2B;ITPR1;HTR2B;AVPR1A;CD38;PTAFR;TBXA2R;HRH1	3.69885	1.11742e-11
KEGG_CELL_CYCLE	CDC7;GADD45B;GADD45G;ATM;MYC;CDC14B;TGFB2;TGFB1;GADD45A;PLK1;TGFB3;MCM4;MAD1L1;CCNA2;MCM7;CHEK1;MCM2;CCND2;CCNB1;CCND3;CDK1;BUB1B;ANAPC11;SKP2;SMAD3;CDKN2A;CDKN1A;CDKN2C;CDK2;CDK4;E2F3;TP53;ORC2;CCNE2;CDK6;MAD2L2;HDAC1	4.4571	1.54123e-11
KEGG_APOPTOSIS	CASP10;CASP8;PRKAR2B;TNF;TNFSF10;FADD;BAX;IKBKB;CASP6;CASP3;AKT3;ATM;NFKBIA;RELA;CSF2RB;NGF;TNFRSF10C;IL1RAP;IL1B;IRAK2;IL1R1;IRAK1;BCL2;IRAK3;PRKACB;TP53;FAS;CYCS;PIK3CD;PIK3R1	5.5733	1.78831e-11
KEGG_FC_EPSILON_RI_SIGNALING_PATHWAY	TNF;FCER1G;FCER1A;PRKCE;JMJD7-PLA2G4B;RAC2;IL13;PLA2G2E;PLA2G10;MAPK11;PLA2G2A;RAC3;PLA2G4A;MAPK13;PLA2G5;AKT3;SOS1;MAPK1;HRAS;MAPK8;SYK;PLA2G4E;BTK;PIK3CD;PLA2G12A;IL4;FYN;PIK3R1	5.81196	3.94474e-11
KEGG_PANCREATIC_CANCER	STAT3;STAT1;RAC2;BRCA2;RAC3;IKBKB;JAK1;AKT3;SMAD3;MAPK1;MAPK8;RELA;CDKN2A;TGFB2;TGFB1;ARAF;TGFBR2;TGFBR1;TGFB3;CDK4;TP53;E2F3;CDK6;PIK3CD;PIK3R1	5.87661	3.58269e-10
KEGG_NEUROTROPHIN_SIGNALING_PATHWAY	TP73;MAP3K3;IKBKB;AKT3;NFKBIA;RELA;SHC3;NGF;BDNF;NGFR;SH2B3;BCL2;FOXO3;ARHGDIB;MAPK11;MAPK13;BAX;RPS6KA2;RAPGEF1;SOS1;MAPK1;HRAS;MAPK8;IRAK2;NTF3;IRAK1;IRAK3;TP53;PIK3CD;GAB1;ATF4;IRS1;ZNF274;NTRK2;PIK3R1	4.07499	3.73446e-10
KEGG_TGF_BETA_SIGNALING_PATHWAY	NOG;TNF;INHBB;INHBC;INHBA;SMAD3;MYC;MAPK1;SMURF1;BMP8A;TGFB2;TGFB1;FST;TGFBR2;AMHR2;LTBP1;TGFBR1;SMAD9;LEFTY2;ROCK2;TGFB3;BMPR2;BMP2;ACVR1C;BMP8B;ZFYVE16;THBS2;THBS1	5.1089	3.85038e-10
KEGG_WNT_SIGNALING_PATHWAY	SFRP1;FZD7;DAAM2;TBL1XR1;WNT2B;WNT10B;AXIN2;NFAT5;MYC;NFATC3;WNT5B;PRKACB;DAAM1;FRAT1;CCND2;NFATC2;NFATC1;CCND3;PLCB1;FRAT2;RAC2;RAC3;DKK1;WNT4;SMAD3;TCF7L2;MAPK8;WNT2;WNT5A;CTNNB1;TBL1X;ROCK2;FZD10;FZD5;NKD2;TCF7L1;TP53;PPP2R5C;SFRP4	3.69092	4.05608e-10
KEGG_VEGF_SIGNALING_PATHWAY	SPHK1;JMJD7-PLA2G4B;RAC2;PLA2G2E;PLA2G10;NOS3;MAPK11;PLA2G2A;RAC3;PLA2G4A;PTGS2;PLA2G5;MAPK13;AKT3;NFAT5;MAPK1;HRAS;NFATC3;HSPB1;PLA2G4E;SRC;PIK3CD;PLA2G12A;NFATC2;NFATC1;PIK3R1	5.50095	4.7546e-10
KEGG_HYPERTROPHIC_CARDIOMYOPATHY_HCM	CACNB2;TNF;ITGA9;ATP2A2;ITGA4;ITGA3;ITGA5;PRKAG2;CACNA1D;SLC8A1;CACNA1C;TNNC1;ITGAV;ITGB1;ACTC1;MYBPC3;DAG1;TGFB2;TNNT2;TGFB1;ITGB8;ACTB;ITGA6;TGFB3;ITGA2;DES;IL6	5.10127	8.05234e-10
KEGG_PROSTATE_CANCER	PDGFD;CREB3;PDGFRB;IKBKB;CREB1;FGFR1;AKT3;CREB5;NFKBIA;SOS1;TCF7L2;MAPK1;HRAS;RELA;CDKN1A;CTNNB1;HSP90AA1;ARAF;BCL2;PDGFB;TCF7L1;CDK2;TP53;E2F3;CCNE2;PIK3CD;ATF4;PIK3R1	4.85731	9.37723e-10
KEGG_ARACHIDONIC_ACID_METABOLISM	AKR1C3;PTGIS;JMJD7-PLA2G4B;PLA2G2E;PLA2G10;PLA2G2A;PLA2G4A;PLA2G5;PTGS2;PTGS1;ALOX12;GPX7;CBR3;LTA4H;PTGES;GPX5;GPX2;GPX3;PLA2G4E;LTC4S;HPGDS;PLA2G12A	6.45984	1.07101e-09
KEGG_ARRHYTHMOGENIC_RIGHT_VENTRICULAR_CARDIOMYOPATHY_ARVC	CACNB2;ITGA9;ATP2A2;ITGA4;ITGA3;ITGA5;DSG2;CACNA1D;SLC8A1;CACNA1C;ITGAV;ITGB1;PKP2;CTNNA1;CDH2;TCF7L2;DAG1;CTNNB1;GJA1;ITGB8;ACTB;ITGA6;ITGA2;TCF7L1;DES	5.39692	1.37909e-09
KEGG_GNRH_SIGNALING_PATHWAY	JMJD7-PLA2G4B;MMP2;PLA2G2E;PLA2G10;MAP3K3;CGA;ADCY3;ADCY2;PLA2G4E;PRKACB;GNAS;PLA2G12A;ADCY9;PLCB1;ADCY5;MAPK11;PLA2G2A;CACNA1D;PLA2G4A;PLA2G5;MAPK13;CACNA1C;SOS1;MAPK1;HRAS;MAPK8;ITPR1;SRC;ATF4	4.26243	5.06771e-09
KEGG_ENDOCYTOSIS	IQSEC1;ADRB3;EPN2;PIP5K1B;RAB11FIP1;AP2A1;CSF1R;SMURF1;DNM2;PARD6B;RAB31;ASAP2;AGAP1;RAB22A;SH3GLB2;HLA-C;CXCR2;SH3GL3;CXCR1;ERBB3;RAB11FIP4;EPS15;TFRC;SH3GL2;KIT;RET;CCR5;PSD3;HSPA6;HRAS;IL2RG;VPS37B;IL2RB;NEDD4;PARD6G;RAB4A;IL2RA;SRC;RABEP1;PARD3;GRK5	3.10368	9.75577e-09
KEGG_MELANOGENESIS	FZD7;CREB3;CREB1;WNT2B;WNT10B;EDNRB;ADCY3;ADCY2;WNT5B;PRKACB;GNAS;GNAO1;ADCY9;PLCB1;ADCY5;MC1R;KIT;WNT4;MAPK1;TCF7L2;HRAS;WNT2;WNT5A;CTNNB1;FZD10;FZD5;TCF7L1;MITF	4.05807	2.15985e-08
KEGG_AXON_GUIDANCE	UNC5B;PLXNC1;SLIT2;ROBO2;PLXNB1;ITGB1;NFAT5;RHOD;NFATC3;CFL1;RND1;SEMA3C;CXCL12;NFATC2;NFATC1;SEMA6B;PAK3;EPHB6;SEMA4D;PAK2;RAC2;EFNA5;RAC3;EFNB2;MAPK1;HRAS;ABLIM1;ROCK2;EPHA1;EPHA3;EPHA4;FYN	3.49157	4.11785e-08
KEGG_PURINE_METABOLISM	ENPP1;XDH;POLR2K;PDE11A;AK4;GUCY2D;NME3;PDE4B;PDE3B;NUDT2;PDE4D;PRIM2;AK5;PDE7B;PDE5A;GUCY1A2;ADCY3;ADCY2;ADA;PDE9A;PRPS1;POLR1E;DCK;ADCY9;AK7;ADCY5;PDE1A;HPRT1;PAPSS1;PAPSS2;GUCY2C;RRM2;PDE8B;ENTPD2;ENTPD1;PFAS	3.09901	7.63174e-08
KEGG_MELANOMA	HGF;FGF7;PDGFD;FGF2;PDGFRB;FGFR1;AKT3;FGF11;FGF12;MAPK1;HRAS;CDKN2A;CDKN1A;ARAF;PDGFB;CDK4;TP53;E2F3;CDK6;PIK3CD;MITF;PIK3R1	4.74495	7.79517e-08
KEGG_ADIPOCYTOKINE_SIGNALING_PATHWAY	STAT3;NPY;TNF;CD36;SLC2A1;PRKAG2;PRKCQ;IKBKB;TNFRSF1B;JAK2;LEPR;AKT3;NFKBIA;MAPK8;CPT1A;PCK2;RELA;PPARA;IRS1;ACSL3;ACSL4	4.82371	1.22759e-07
KEGG_ADHERENS_JUNCTION	SORBS1;WAS;PTPN6;WASF2;RAC2;RAC3;PTPRF;FGFR1;SMAD3;CTNNA1;TCF7L2;MAPK1;CTNNB1;TGFBR2;TGFBR1;ACTB;SSX2IP;SRC;TCF7L1;FYN;PTPN1;PARD3	4.55871	1.35449e-07
KEGG_PROGESTERONE_MEDIATED_OOCYTE_MATURATION	ADCY9;ADCY5;CDK1;ANAPC11;MAPK11;MAPK13;RPS6KA2;AKT3;CPEB1;MAPK1;PDE3B;MAPK8;ADCY3;HSP90AA1;ARAF;ADCY2;PLK1;CCNA2;CDK2;PRKACB;PIK3CD;MAD2L2;CCNB1;PIK3R1	4.15932	1.46816e-07
KEGG_BLADDER_CANCER	HRAS;CDKN2A;CDKN1A;TYMP;ARAF;MMP2;MMP1;MMP9;CDK4;RASSF1;TP53;E2F3;DAPK1;THBS1;MYC;MAPK1	6.49618	1.86579e-07
KEGG_RENAL_CELL_CARCINOMA	PAK3;HGF;PAK2;SLC2A1;HIF1A;ARNT2;RAPGEF1;AKT3;SOS1;MAPK1;HRAS;EPAS1;TGFB2;TGFB1;FH;ARAF;TGFB3;PDGFB;PIK3CD;GAB1;PIK3R1	4.52815	2.82478e-07
KEGG_LYSOSOME	GGA1;CTSZ;IGF2R;CTSW;CTSS;AP4S1;LAMP2;LAPTM5;AP4B1;ABCB9;AP1B1;CTSK;GNPTAB;SMPD1;CTSH;CTSG;CTSE;GM2A;CTSC;AP3D1;ABCA2;ARSB;PPT2;GLA;CD68;CTNS;LIPA;LAPTM4B;AP1S1	3.37067	3.16627e-07
KEGG_ARGININE_AND_PROLINE_METABOLISM	ARG2;GLS;P4HA2;NOS3;NOS2;NOS1;GOT2;AGMAT;ASS1;SAT1;AMD1;MAOA;CPS1;ALDH1B1;GATM;OTC;CKM;CKMT1B	5.28014	3.42483e-07
KEGG_RIG_I_LIKE_RECEPTOR_SIGNALING_PATHWAY	CASP10;CASP8;CXCL10;TNF;IFNA2;FADD;MAPK11;IL12A;MAPK13;IKBKB;IKBKE;NFKBIA;IRF3;IFIH1;MAPK8;RELA;TRAF3;IFNB1;ATG5;AZI2;RNF125	4.43752	3.68379e-07
KEGG_ABC_TRANSPORTERS	ABCA6;TAP1;ABCA3;ABCB11;ABCA2;ABCC3;ABCC9;ABCC5;ABCG1;ABCB1;ABCA8;ABCC10;ABCB9;ABCA13;ABCA9;ABCG5	6.03233	3.94634e-07
KEGG_STEROID_HORMONE_BIOSYNTHESIS	AKR1C4;CYP3A5;HSD3B1;CYP11A1;AKR1C3;HSD11B2;HSD11B1;HSD17B2;CYP19A1;CYP17A1;UGT1A4;UGT1A1;UGT1A7;AKR1C2;AKR1C1;CYP1B1;SRD5A1;CYP3A43	5.13732	4.67812e-07
KEGG_PPAR_SIGNALING_PATHWAY	SORBS1;ACADL;CD36;APOA1;SCD;NR1H3;MMP1;GK;LPL;CPT1A;PCK2;FABP4;PPARA;FABP3;HMGCS2;EHHADH;PPARG;SCD5;ACSL3;ACSL4	4.3115	9.91955e-07
KEGG_AMYOTROPHIC_LATERAL_SCLEROSIS_ALS	TNF;ALS2;MAPK11;GRIN2C;GRIN2D;MAPK13;NOS1;BAX;NEFM;SLC1A2;NEFH;TNFRSF1B;CASP1;CASP3;BCL2;TP53;CYCS	4.9855	1.33501e-06
KEGG_SYSTEMIC_LUPUS_ERYTHEMATOSUS	CD80;CD86;CD28;CTSG;FCGR2A;C8A;C7;FCGR2B;HLA-DRB4;HLA-DRB3;C6;C5;HLA-DPA1;HLA-DPB1;HLA-DQA1;HLA-DQB1;C2;C1S;C3;C1QB;C1QA;C1R;HLA-DRB1;HLA-DRA;HLA-DOB;TNF;FCGR2C;HLA-DMA;CD40LG;CD40	2.99339	1.59584e-06
KEGG_GLUTATHIONE_METABOLISM	GSTT2;GSTT1;MGST1;GSTM1;GPX7;GSTM4;GGCT;GSTM2;GSR;RRM2;GPX5;GPX2;GPX3;GCLM;ANPEP;G6PD	4.96718	2.81699e-06
KEGG_GLYCOLYSIS_GLUCONEOGENESIS	ACSS2;PGK1;PGM2;FBP1;HK2;PGAM1;ADH1A;ENO1;PCK2;ALDH1B1;AKR1A1;ENO3;ENO2;PGAM4;ALDH1A3;LDHA;PGM1;GPI	4.31953	3.32408e-06
KEGG_ACUTE_MYELOID_LEUKEMIA	STAT3;PML;KIT;IKBKB;AKT3;STAT5A;MYC;SOS1;TCF7L2;MAPK1;RUNX1;HRAS;RELA;ARAF;TCF7L1;PIK3CD;PIK3R1	4.48666	4.12085e-06
KEGG_ENDOMETRIAL_CANCER	MLH1;AKT3;AXIN2;CTNNA1;MYC;SOS1;MAPK1;TCF7L2;HRAS;CTNNB1;ARAF;TCF7L1;FOXO3;TP53;PIK3CD;PIK3R1	4.69106	5.01366e-06
KEGG_LONG_TERM_DEPRESSION	PLCB1;CRH;JMJD7-PLA2G4B;PLA2G2E;PLA2G10;PLA2G2A;PLA2G4A;PLA2G5;NOS1;MAPK1;HRAS;ITPR1;GNA13;GUCY1A2;ARAF;PLA2G4E;GNAS;GNAO1;PLA2G12A	3.93346	5.3891e-06
KEGG_VASOPRESSIN_REGULATED_WATER_REABSORPTION	ADCY9;DYNLL1;AQP3;ADCY3;CREB3;DCTN5;AVP;PRKACB;CREB1;GNAS;DYNC2H1;DCTN1;CREB5;ARHGDIB	4.92366	1.26023e-05
KEGG_LINOLEIC_ACID_METABOLISM	CYP3A5;AKR1B10;PLA2G4E;JMJD7-PLA2G4B;PLA2G2E;PLA2G10;PLA2G2A;PLA2G4A;CYP3A43;PLA2G5;PLA2G12A	6.44386	1.63834e-05
KEGG_THYROID_CANCER	PAX8;HRAS;NCOA4;CTNNB1;TCF7L1;PPARG;TP53;RET;MYC;MAPK1;TCF7L2	6.44386	1.63834e-05
KEGG_TIGHT_JUNCTION	JAM3;MYH14;CTTN;AKT3;CTNNA1;LLGL2;PARD6B;MAGI1;ASH1L;MYH11;MYH10;CLDN10;CGN;CLDN6;CLDN1;PRKCE;PRKCQ;HRAS;PARD6G;SPTAN1;CTNNB1;CLDN11;ACTB;SRC;CDK4;CLDN14;PARD3	2.74357	1.93395e-05
KEGG_FC_GAMMA_R_MEDIATED_PHAGOCYTOSIS	SPHK1;WASF2;AMPH;PIP5K1B;AKT3;FCGR2A;FCGR2B;DNM2;CFL1;PLA2G4E;ASAP2;WAS;FCGR2C;PRKCE;RAC2;PLA2G4A;PLA2G4F;MAPK1;GSN;SYK;PIK3CD;PIK3R1	3.13997	1.9893e-05
KEGG_METABOLISM_OF_XENOBIOTICS_BY_CYTOCHROME_P450	AKR1C4;CYP3A5;GSTT2;GSTT1;AKR1C3;ADH1A;MGST1;GSTM1;GSTM4;GSTM2;UGT1A4;UGT1A1;UGT1A7;AKR1C2;AKR1C1;CYP1B1;ALDH1A3;CYP3A43	3.65407	2.12558e-05
KEGG_ALDOSTERONE_REGULATED_SODIUM_REABSORPTION	NR3C2;FXYD4;SCNN1G;ATP1B2;ATP1B1;HSD11B2;HSD11B1;ATP1A1;PIK3CD;IRS1;SGK1;PIK3R1;MAPK1	4.72853	3.56462e-05
KEGG_INSULIN_SIGNALING_PATHWAY	PRKAG2;FBP1;HK2;IKBKB;EXOC7;AKT3;PDE3B;SHC3;PRKACB;FLOT1;RHOQ;PTPN1;PRKAR2B;TSC2;SORBS1;SOCS2;PTPRF;RAPGEF1;SOS1;MAPK1;HRAS;MAPK8;PCK2;ARAF;PIK3CD;IRS1;PIK3R1	2.59349	4.44457e-05
KEGG_CYTOSOLIC_DNA_SENSING_PATHWAY	CXCL10;IFNA2;CCL5;IKBKB;CASP1;IKBKE;NFKBIA;IRF3;IL18;RELA;IFNB1;IL33;PYCARD;IL1B;IL6	3.95619	4.83852e-05
KEGG_BASAL_CELL_CARCINOMA	FZD7;WNT2B;WNT10B;WNT4;AXIN2;TCF7L2;WNT2;WNT5A;CTNNB1;FZD10;WNT5B;FZD5;TCF7L1;BMP2;TP53	3.95619	4.83852e-05
KEGG_GAP_JUNCTION	PLCB1;ADCY9;ADCY5;CDK1;PDGFD;PDGFRB;LPAR1;SOS1;MAPK1;HRAS;ITPR1;GJA1;GUCY1A2;HTR2B;ADCY3;ADCY2;SRC;PDGFB;PRKACB;GNAS	3.01652	7.40047e-05
KEGG_GLYCEROPHOSPHOLIPID_METABOLISM	PEMT;MBOAT2;PCYT1A;JMJD7-PLA2G4B;PLA2G2E;PLA2G10;LPCAT3;PLA2G2A;ETNK2;PLA2G4A;PLA2G5;CDS1;DGKB;PLA2G4E;PLA2G12A;GPAT2;LCAT;CRLS1	3.22	8.32294e-05
KEGG_ALPHA_LINOLENIC_ACID_METABOLISM	JMJD7-PLA2G4B;PLA2G2E;PLA2G10;PLA2G2A;PLA2G4A;PLA2G5;PLA2G12A;PLA2G4E	7.6644	0.000100719
KEGG_GLIOMA	PDGFRB;AKT3;SOS1;MAPK1;HRAS;CDKN2A;SHC3;CDKN1A;ARAF;PDGFB;CDK4;TP53;E2F3;CDK6;PIK3CD;PIK3R1	3.44536	0.000105782
KEGG_TYPE_II_DIABETES_MELLITUS	MAPK8;TNF;MAFA;SOCS2;PRKCE;HK2;CACNA1D;CACNA1C;IKBKB;PIK3CD;IRS1;PIK3R1;MAPK1	4.03311	0.000130152
KEGG_NON_SMALL_CELL_LUNG_CANCER	RASSF1;AKT3;SOS1;MAPK1;HRAS;CDKN2A;ARAF;FOXO3;CDK4;TP53;E2F3;CDK6;PIK3CD;PIK3R1	3.69183	0.00015538
KEGG_PATHOGENIC_ESCHERICHIA_COLI_INFECTION	WAS;CLDN1;CTTN;LY96;CD14;ITGB1;TLR5;CTNNB1;ACTB;ROCK2;EZR;ARHGEF2;TLR4;FYN	3.51588	0.000235615
KEGG_HEDGEHOG_SIGNALING_PATHWAY	GAS1;ZIC2;CSNK1G1;WNT2B;WNT10B;WNT4;CSNK1G3;BMP8A;WNT2;WNT5A;WNT5B;PRKACB;BMP2;BMP8B	3.51588	0.000235615
