# Supplementary material for: Molecular Mechanisms of Endometriosis Revealed Using Omics Data
Source: Biomedicines. 2023 Aug 7;11(8):2210. doi: 10.3390/biomedicines11082210 (PMC10452455; doi:10.3390/biomedicines11082210)
Supplement: Supplementary file 1 [file biomedicines-11-02210-s001.zip › Supplementary Table S10.xlsx]

## Sheet: Supplementary Table S10
DEGs from single cell RNA-sequencing data analysis
MGP
FTL
MALAT1
MT-ND2
MT-ND1
JUND
NFKBIZ
ARC
ATF3
PPP1R15A
MT-ND3
CEBPB
FOSB
TNFAIP3
IER2
LUM
DUSP1
MT-ND5
IGFBP2
SOD2
MT-CO3
SAT1
MT-CYB
IER3
GNLY
MT-ND4
MT-CO2
NFKBIA
MT-ATP6
MT-CO1
RND3
CXCL8
APOE
NEAT1
TIMP3
C11orf96
PAEP
IGFBP1
KLF6
FOS
HBA2
PNRC1
TRIB1
RRAD
EEF1A1
JUN
VCAN
COL1A2
DKK1
TGM2
IFITM3
RBP1
TNFAIP2
CRYAB
CD81
TOMM7
XBP1
ECM1
CCNI
SUMO2
EMP1
EID1
GADD45G
MEG3
CCDC71L
GADD45A
CXCL2
GEM
RPL21
BASP1
NR4A1
ULK4
KLF4
RPS27
HSPA5
NPM1
AC016831.1
SLC2A1
SERTAD1
RPS26
RPL17
CRABP2
RPL22
CDKN1C
COX6C
MMP11
UBC
IGFBP3
YBX3
SLPI
JUNB
TMSB4X
CRISPLD2
RPS23
SOCS3
RPS29
C1QTNF6
SNHG29
HSP90B1
CCNL1
WNT2
RTN4
HMGN2
PPP1R14B
IRS2
MCL1
IGKC
WTAP
PDLIM1
MAP1LC3B
ZFAND5
GPRC5A
RPS25
MAFF
RBBP6
TXN
PLIN2
LEFTY2
EMILIN2
TUBB4B
RHOB
CFD
EIF3E
CIRBP
PGRMC1
ANXA2
CALR
C12orf57
RPL9
ZFP36
RBP7
TMEM165
IGFBP7
HNRNPA1
RAC1
SSR4
RAMP1
ID4
TMEM37
RPL15
MXRA8
MAP3K8
MIR222HG
BAG3
WFDC2
ADIRF
MTDH
PEBP1
PIM3
MYL6
COMMD6
CARMN
DNAJA1
MRPS24
HSPH1
BGN
BTG2
MYADM
ERN1
RASD1
MRFAP1
RPS27A
HSP90AA1
RASGRP2
MGST1
RPL38
EEF1G
IFITM1
HMGB1
CLDN4
INSR
SFRP4
ARID5B
NFIL3
IGFBP5
MYDGF
TUBA1B
S100A6
GAS5
ACTG1
KDM6B
CD44
NME2
RPL30
CCN1
UQCRB
CD55
KCNQ1OT1
WNT4
REL
RGCC
CDK2AP2
PRLR
EIF4B
SCGB2A1
IGFBP4
SERPINE1
CD83
FOXO1
HBA1
CITED2
RPL5
EIF4A2
HOXA10
PDIA6
FBLN1
BTG3
ADRA2C
MANF
GADD45B
CLDN3
THBS1
RPL23A
ABL2
BEX3
RNASEK
AKAP13
MFAP4
PRDX2
SERPING1
AC058791.1
INAFM1
RPS3A
SPARC
S100A4
CXCL14
CPXM1
SLC3A2
B2M
RPL34
ACTA2
RPS18
RPS27L
C7
CCDC80
CYR61
ST13
DNAJB1
TWIST2
SPARCL1
ALDH1A1
PPIB
RPL12
RPS13
CTGF
F3
ADAMTS5
RPL19
LRRC75A
AXL
BST2
PLPP1
C20orf27
TAGLN
CALD1
SERPINH1
RPL37A
IFITM2
MFGE8
HSPA1A
CD151
SERPINF1
GAPDH
RPS20
S100A16
S100A10
ZFAND2A
RPL6
CUX1
RPS6
TCF4
CALM2
EEF1D
RARRES2
APOD
FERMT2
MEG8
C6orf48
RPL24
NID1
PAGE4
IGF1
CD248
EIF4A1
RPL27A
GNG11
COX7C
HSPB1
RPL3
BTF3
LY6E
CALM1
RPL31
RAP1B
COL3A1
CRIP1
VIM
NUCKS1
FAU
TIMP1
GPX3
SRP14
NACA
HNRNPA2B1
PERP
ZFP36L1
H3F3A
TSC22D1
EEF2
MT-ND4L
CD24
IGFBP6
HSPA6
KRT8
TFPI2
KRT19
PTGDS
MIF
COL1A1
CLU
MGP
CCDC80
SPARCL1
COL1A2
SFRP2
IGFBP5
C7
GSN
DCN
SERPINF1
ADIRF
SFRP1
S100A4
COL6A2
COL14A1
OGN
ADH1B
DPT
PTMA
RPS18
TNFAIP3
NFKBIA
RND3
GNLY
APOE
RBP1
TIMP3
C11orf96
PAEP
IGFBP1
MFAP4
SFRP4
CXCL8
IER3
IGFBP2
COL6A3
IFITM3
SRPX
WISP2
SAT1
CFD
MYL6
PRELP
GPNMB
CEBPB
TXN
FBLN1
IGF1
LRP1
HBA2
HBB
TGM2
COX6C
CST3
FXYD1
C1R
FTL
NR2F1
RPS2
RPL12
SOD2
PDGFRL
ARC
CXCL12
MATN2
NEAT1
DKK1
CRABP2
RRAD
TSHZ2
RAMP1
C3
RPLP0
PTGIS
PODN
COL6A1
RPS7
PDLIM1
NFKBIZ
PBX1
C1S
RARRES2
LHFPL6
AEBP1
DUSP1
PNRC1
PLTP
LAPTM4A
TMSB10
ULK4
ITM2B
BASP1
S100A10
TNXB
CCDC71L
PI16
RPL29
SLIT3
SGCE
CTHRC1
C1QTNF6
MEIS2
PLAC9
VCAN
COL1A1
RPS14
SSPN
PPP1R14B
TSC22D3
ARL6IP5
SELENOP
GPC3
TIMP1
TMEM37
CD99
ATF3
MRC2
TRIB1
PTGDS
COL3A1
TXNIP
JUND
ASPN
C20orf27
ABCA8
CYR61
FCGRT
BGN
SNHG29
TNFAIP2
PPP1R15A
LGALS3BP
ALDH2
AHNAK
LEFTY2
CXCL2
SVEP1
MT-CO3
IGFBP3
NFIB
CYBRD1
GADD45A
SLPI
GADD45G
MT-CO1
EEF1G
ITM2A
WFDC2
OLFML3
CFH
RPS19
SLC2A1
LUM
TCF4
PNISR
44811
ADRA2C
LIMA1
IGFBP6
GNG11
NUCKS1
MT-CO2
RPL3
YBX1
TSPAN4
PRRX1
PRLR
PSAP
TOMM7
S100A16
PDK4
NME2
AC016831.1
MYL9
YBX3
MT-ATP6
RPL36A
HMGB1
WTAP
KLF6
CRYAB
GAS5
LEPR
SCGB2A1
PIM3
MANF
RPL17
EMILIN2
PDLIM3
PLIN2
CARMN
RASGRP2
SERTAD1
CD24
NFIA
ABI3BP
CPQ
HSPA1B
RPL18A
FOXO1
N4BP2L2
EID1
RPL4
INAFM1
PRDM1
RPL39
MGST3
TWIST2
CCN1
PIK3R1
XBP1
RPL28
CTSB
PFN1
RAC1
DDIT4
ZBTB20
TACC1
CD55
ID3
RPS3
NPW
DNAJA1
RPS4X
MIR99AHG
PPP1R14A
NFIL3
CTSK
CLDN4
RPS24
MAP1LC3B
RPL7
MRPS24
PDIA6
HBA1
HSPA5
CLU
ID4
C12orf57
THBS2
CDK2AP2
ZNF106
CDKN1C
LY6E
CFL1
ACTB
FSTL1
RPL10A
RPL26
RAP1B
NFIC
EIF5A
GEM
HSPA1A
LUC7L3
IRS2
VIM
CIRBP
SPINT2
PGRMC1
EIF4A1
APCDD1
CALR
TUBB4B
MBNL1
SSR4
COL18A1
WNT4
B2M
RBBP6
LITAF
SPRY1
CUX1
PMP22
ALDH1A1
CITED2
ADAMTS9
RPS17
CD83
SOCS3
RPS5
NDUFS5
MT-ND5
FGF7
ZFAND5
CD81
BTG1
SRSF5
MT-CYB
RHOB
MYDGF
DDX17
DDAH2
S100A11
RPL8
PDLIM4
THY1
ARID5B
EZR
CALM1
GNAS
HLA-B
FKBP1A
FAM213A
WSB1
MXRA8
SEC61G
SON
PCOLCE
KRT18
XIST
EMP1
HINT1
NPC2
MIF
SPARC
OSTC
ADAMTS5
CPXM1
NBL1
RPS26
SRSF7
PLPP1
KRT8
PAGE4
MMP11
TFPI2
TM4SF1
ACTA2
MT2A
IFI27
GPX3
KRT19
HP
S100A10
KRT19
ITLN1
TIMP1
KRT18
C3
PRG4
KRT8
CLU
SLPI
TFPI2
MT1E
CLDN1
TM4SF1
MT2A
FN1
ADIRF
CHI3L1
MSLN
NNMT
IFITM3
CALB2
TXNIP
RARRES1
PLA2G2A
RARRES2
UPK3B
LXN
CCDC80
PROCR
KRT7
LY6E
CLDN15
CD9
COL8A1
ANXA3
ANXA1
C19orf33
EZR
KLK11
SULF1
VCAM1
CFH
CLIC3
PNOC
PTGIS
CPA4
BCAM
IL18
PDLIM3
BCHE
CPE
SBSPON
CFB
SEMA3C
SELENBP1
MST1
NFIB
CST6
PTPRF
DMKN
PHGDH
RARRES3
TCEAL2
SCG5
LGALS2
LINC01133
DSC3
INMT
PTGER3
AC245041.2
DSG2
AOX1
CRB2
ANXA8
BNC1
TGM1
MDK
TXN
RAMP1
IGFBP3
VCAN
RBP1
APOE
TIMP3
LUM
C11orf96
IGFBP1
LAMA4
MT1X
PLA2G16
MEST
TGM2
HCFC1R1
TPT1
CFI
ITGA3
PIEZO2
COX6C
HEG1
GNLY
IGFL2
CXADR
IFITM2
ALDH1A3
PLOD2
COBLL1
IGFBP2
GNG11
PRDX6
SPINT2
PDZK1IP1
HAS1
GAS1
PERP
EMB
RPS12
VAMP8
PRR9
SERPING1
MT-ATP6
CGN
ARHGAP18
CD24
BST2
SLC12A8
CD81
PODXL
BCO2
WFDC2
GATA6
PDLIM5
CYSTM1
TNFSF10
ALDH2
SLC39A8
FABP5
ASPHD1
PRLR
SPON2
RND3
MEIS2
GADD45G
HMGN3
REC8
BASP1
MT-CYB
MT-CO2
SERPINE1
DAPL1
CD151
PKHD1L1
LGALS3BP
PPP1R15A
FAM162A
SLC9A3R1
PCP4
ARC
ISLR
MGP
RGS4
GAPDH
DKK1
APCDD1
AAMDC
ADRA2C
TMEM98
IFITM1
MT-CO3
APOD
NID1
CPB1
SPRY1
LGALS1
LEFTY2
SLC16A1
NFKBIA
MGST1
ARHGAP29
PLS3
ATP1A1
LITAF
PLPP1
PPP1R14A
RERG
FIS1
EPHB6
TPD52L1
SPOCK2
CFD
TMSB4X
FBLN1
PAEP
PLSCR4
CRIM1
RORB
TWIST2
COL4A2
TOMM7
PRDM1
CD248
CLEC2B
JUND
MXRA8
C20orf27
PKM
GSTM3
MEDAG
INAFM1
MYL6
NPM1
MT-ND4
XBP1
MEG3
H3F3B
ADH1B
ANXA2
THY1
UGP2
COX7C
OSR1
DES
ULK4
VSIR
CD82
MT1M
MMP2
TMEM176B
CKB
ALKBH7
CRISPLD2
SLC2A1
KIF22
PLXDC2
IFI27
BICC1
S100A4
DUSP6
CMYA5
EEF1A1
SLC40A1
IGFBP4
C1QTNF6
ESR1
SLIT3
DSP
ZEB1
EFHD1
NEAT1
DAB2
CYR61
TNFRSF1A
TMEM14C
COL15A1
PGR
CAPN2
CCNG1
HINT1
TSPAN4
CYBRD1
COL4A1
CYB5A
SPRR2F
OSR2
FRMD4B
C1R
F3
TBX3
RAP1B
TNFAIP2
ISOC2
AC016831.1
MFGE8
SPARCL1
C1S
SERTAD1
MXRA5
EIF1
MDH1
MT-ND2
DNAJA1
MT-ND1
DCBLD2
FOXO1
BIRC3
MXRA7
MRPS6
UQCRB
CCL2
IFI16
HBB
APOC1
RPS6
EMILIN2
INSR
ZFAS1
ATP5MC2
ENG
CISD1
LDHA
EIF4B
MITF
HSPB6
TCIM
RASGRP2
NR2F1
NDUFC1
ATP2B1
NR2F2
TMEM123
BGN
CHCHD10
RPL22
PLIN2
CXCL12
SDC4
POSTN
ACTB
NPW
AXL
PPP1R14B
RPS27L
EFEMP1
PCOLCE
CFL1
POLR2L
RPLP1
PHPT1
RBBP6
GEM
MANF
MAP1LC3B
AREG
FBLN2
TPST1
CLMP
RPL5
WTAP
CALR
TMEM14B
CPXM1
SLC5A3
WNT4
C8orf59
BTG1
EVA1B
COMMD6
UQCR10
SMTN
PRDX2
FOSB
SH3GLB1
COL1A1
MT-ND5
SLC6A8
KCNQ1OT1
GAS6
CD55
S100A13
CLDN4
SGK1
GYPC
MGST3
CNN1
CXCL14
TPM2
PIM3
RASD1
RPS23
FBLN5
ERN1
SERPINF1
SNHG29
CD44
SCGB2A1
PTN
S100A6
MTDH
EIF4A1
YBX1
LGALS3
HSPA5
CDKN1C
IRS2
NDUFA4
FAM213A
TRIB1
MYDGF
EIF3M
SNHG8
TUBA1A
AC058791.1
DIO2
RNH1
TSC22D1
CUX1
SDC2
FERMT2
RPS27A
TSC22D3
MYL9
ZYX
NUPR1
MMP11
CXCL8
HBA2
MYL12B
PRDX5
RPL34
ENO1
CCDC71L
RRAD
COL1A2
CALM2
KLF4
ARL4D
ADAMTS5
SSR2
SELENOM
SSR4
RPS25
CD83
COX4I1
CXCL1
HSPA1B
REV3L
TIMP2
PALLD
DDX5
RPS28
PDIA6
CTSB
ETS2
CTHRC1
APLP2
RPL17
RCN1
UBE2S
PMEPA1
SLC25A3
FUS
PDLIM2
RPSA
BTG3
EIF4A3
SEC61B
IER5L
H2AFZ
TGFBI
MRPS24
RPS20
EEF1G
RAC1
IGFBP5
LTBP4
EMP1
TGFB1I1
GNAS
CALU
SLC3A2
CTSC
MEG8
ERRFI1
SPARC
SFRP4
EIF3E
EMP3
SELENOK
TPM4
THBS2
TCEAL7
RPS7
RPS18
SELENOS
KRT10
HNRNPC
MAFF
SEC61G
SSR3
SELENOP
EIF5A
STMN1
SFPQ
AKAP13
NME2
PNRC1
ARF1
CAV1
TNFAIP3
ATP6V1G1
H3F3A
NFKBIZ
LRPAP1
CCN1
COL6A3
EGR1
CRYAB
RPL36A
OGN
CTSK
ARF4
PTMS
XIST
SOX4
HSPA1A
SAT1
TCEAL4
RHOB
RPS26
ACTG1
SOCS3
CXCL2
KLF6
TUBB4B
IER2
HBA1
SFRP1
RPS17
HSPA6
CTGF
GPX3
HBB
HBA2
SLPI
HBA1
SCGB3A1
WFDC2
TFF3
MUC5B
SCGB2A1
DEFB1
PIGR
LTF
AGR2
TMEM260
MALAT1
ACTG1
ACTB
CALD1
IGFBP2
RAMP1
RND3
LGALS1
VCAN
DCN
LUM
RBP1
TIMP3
APOE
C11orf96
IGFBP1
MEG3
SCGB1D2
NEAT1
TXN
TGM2
COX6C
TUBA1A
IGFBP7
RPS18
SPARC
MYL9
PAEP
MMP2
MT-ND4L
SPON2
FOLR1
VIM
ARC
CRISPLD2
THSD4
C1R
IGFBP3
IGFBP4
CRYAB
TMSB10
PTMA
CD81
GNLY
NFKBIA
SOD2
TPM1
MXRA8
UBC
SERPING1
ARID5B
GEM
CPXM1
MFGE8
TIMP2
EIF1
FXYD3
RPS29
PLIN2
RPS2
PPP1R15A
RPL10
SORD
CAPS
KIAA1324
TAGLN
SERPINH1
GADD45G
C1S
EGR1
GADD45A
DKK1
BASP1
SORL1
CCDC71L
C20orf27
COL1A1
PLPP1
COL6A2
KRT18
PAM
TNFAIP3
KCNQ1OT1
LCN2
ST6GALNAC1
CD74
SELENOM
PNRC1
PLAT
ATP6V1C2
CD63
TUBB
AXL
LEFTY2
ADRA2C
TRIB1
NID1
CSTB
CD248
NFKBIZ
ISLR
PRR15
FOSB
IGFBP6
PCOLCE
APOC1
SLC51B
S100A2
RPS26
EMP1
ATF3
RPS5
KLF6
ASRGL1
PPP1R14A
COL4A2
APCDD1
PPDPF
SERTAD1
ITGB1
RAP1B
LAPTM4A
ZEB1
RPLP0
FOXO1
TPM4
RPS7
EHF
HTRA1
SELENOP
DNAJA1
RPL18A
HSP90AB1
MSX1
C1QTNF6
CLU
PTGS2
TPM2
EIF4A1
CALU
THBS1
TWIST2
JUN
CDKN1C
RPL13A
DMKN
RORB
MAP1LC3B
CEBPB
SSR2
RPL38
SLC39A8
LMNA
TGFB1I1
ULK4
PRLR
EMILIN2
JUNB
ADAMTS9
INAFM1
CUX1
SNHG8
SMTN
SOCS3
MCL1
EMP3
APOD
RPL28
SNHG29
COL4A1
EFEMP1
FERMT2
THY1
CLMP
STARD10
SERPINF1
OSTC
CFL1
PDLIM1
KRT8
ARPC2
WNT4
RABAC1
MTDH
CD151
PDLIM2
CALR
RPL13
RCN1
ANTXR1
CAVIN1
EVA1B
PPIB
TMSB4X
DYNLL1
AKAP13
LRPAP1
COX7C
PRDM1
CLEC2B
NUPR1
PDLIM4
TRH
TUBB4B
PMP22
RPL18
INSR
IER2
PSMA7
MRPS6
ATP5ME
AC016831.1
HSPA5
FUS
HMGN1
TMEM37
H3F3B
SLC2A1
FLNA
RPS14
VASN
IER3
SLC25A37
BSG
TBX3
WTAP
LGALS3
RBBP6
RTN4
ADAMTS5
TWIST1
TCEAL4
PXDN
RPL12
PDGFRA
MYC
RRAD
RPL29
SPHK1
SOX17
ZFAND5
TUBB6
SMIM22
FKBP1A
EEF1G
MYDGF
ZYX
RNASET2
ALDH1A2
ITGA6
OSR2
EPCAM
MXRA7
SLC3A2
GPX4
COL6A1
FBN1
HAND2-AS1
RPS3
CARHSP1
FBLN2
GAS5
CNN1
MYADM
MDK
HAND2
BHLHE41
RAB13
RPL7A
SOX4
MANF
MIR222HG
CTSB
DAXX
RASGRP2
RPL17
SAT1
BTG3
AKAP12
SERPINE1
LDHB
CXCL1
RACK1
NAP1L1
TUBA1B
ENG
LMCD1
UQCRB
BAG3
CAV1
SPINT2
NME2
FILIP1L
ARPC5
NPW
STMN1
RPS19
NBL1
RAB31
COL15A1
AEBP1
MAP1B
ATP5F1E
S100A13
RPL8
CCN1
GJA1
MT-ND3
FBLN5
ETS2
RPS8
SPSB1
TNFAIP2
CLIC4
MRPS24
DUSP1
YBX3
ACTN1
S100A11
B2M
PHLDA1
JUND
COL3A1
CD59
CCDC85B
MT-CYB
KANK2
LITAF
SRM
GPRC5A
GABARAPL1
EIF1B
NR2F2
ABL2
EIF4E
CDC42
PTN
RPL7
RNH1
ANXA5
LTBP4
MAP4
CXCL8
MAP3K8
MEG8
NAMPT
RAC1
KDM6B
PIM1
KLF4
ADAMTS1
PALLD
IRS2
MT-ND5
RPSA
NFIL3
PSMD8
RAN
TMEM45A
PNRC2
RPL22L1
RNASEK
RPS25
PKM
TOB1
HLA-DRB1
YWHAQ
MORF4L2
COTL1
MT-ND4
PDIA6
SLC5A3
RHEB
44815
TWISTNB
CLIC1
FOS
VCL
TCEAL9
TUBA1C
ACTA2
BST2
SEC61B
CITED2
EEF1B2
EIF4A3
EIF1AX
LIMS1
RHOB
HSPH1
DST
LDHA
CTSL
ZBTB20
SMDT1
CD44
EIF5A
SPRY1
C19orf33
TNFRSF12A
MTCH1
ARF4
TOMM7
SNRPB
GAS1
S100A16
CYB5A
PPP1R14B
F3
CLDN10
CFD
RPL37
DEPP1
RCAN1
HSPA8
SELENOS
CD83
KDELR2
HSPA1A
P4HB
SSR3
ADIRF
EEF2
MUC1
CTSK
CYBA
UQCR10
MGST1
NDUFC1
CD9
IGF1
HLA-DRA
TSC22D3
RPS17
SPARCL1
H2AFZ
DNAJB1
HES1
RPS21
ANXA1
ELF3
SGK1
CXCL3
ATP5IF1
RASD1
ZFP36
RPS28
RPL34
EZR
HSPA6
CCL4
RPS27
CYR61
MMP11
TPT1
PTGDS
GPX3
CXCL14
MT-CO3
MGP
MT2A
IGFBP5
MMP7
WFDC2
ELF3
MMP26
CPM
CLDN4
CLDN3
SAT1
SCGB2A1
ASRGL1
CD24
KRT18
SPINT2
TACSTD2
KRT8
UCA1
LINC01541
MSX1
RNASET2
EPCAM
TMEM101
SOX17
STX18
CMTM6
MECOM
DLX5
CCND1
OCIAD2
CADM1
NEDD9
CLDN7
C2orf88
PLPP2
UGT2B7
EHF
SOX9
S100A6
RAMP1
COL1A1
RBP1
APOE
TIMP3
DCN
LGALS1
LUM
C11orf96
MUC1
IGFBP7
CD9
CD74
PLCB1
GALNT4
MSX2
PPA1
MYL9
SERPINA5
DMKN
CALD1
IGFBP1
SLC26A2
PMAIP1
SH3YL1
GABRP
SELENOM
SERINC2
IHH
RPL10
CAPS
DSP
TFPI2
SERPINA1
TPM2
TSC22D1
DCDC2
KIAA1324
AGR2
TGM2
PAPSS1
CXADR
MIF
USP53
ATP1B1
NME2
AL365259.1
RAB11FIP1
PODXL
TMSB4X
TRH
CA12
ACSL5
SPARC
CNDP2
PGR
MMP2
VCAN
MGST2
TAGLN
DNAJC10
CDH1
TRMT9B
KRT19
MXRA8
IGFBP3
LAMC2
SNHG29
F11R
EEF1G
PRR15
KLF5
COL3A1
C1R
IRF6
PERP
TSPAN1
TMEM123
VMP1
ESR1
MPZL2
COL6A2
SPON2
MT-ND4L
NPAS3
MFSD2A
SPDEF
LIMS1
MUC16
ADAMTS6
EDN1
SCGB1D2
COX6C
DLX6-AS1
ITGA6
ZNF592
ID3
RAB25
TPD52L1
MEG3
DANCR
CLDN10
EZR
SINHCAF
IGFBP6
SLC47A1
FTL
GAS5
TCIM
PAX8
CD81
PCDH7
IGFBP4
TIMP2
TPT1
PIGR
HMGCR
SPINT1
PKP4
ADAM28
HMGA1
CRISPLD2
S100A14
TSTD1
TUBA1A
BIRC3
CPXM1
LGR5
SPRY1
UGCG
AC020916.1
ANAPC4
IGFBP2
DUSP1
RPS17
C19orf33
CRIP2
LAPTM4B
HMGCS1
SEMA3B
C12orf45
HSP90B1
SCNN1A
PPP1R9A
MIA2
CEBPB
EMP3
CFD
DUSP2
DEFB1
CRIP1
EIF1
HOMER2
GEM
SORBS2
PAM
SYNGR2
DSG2
TPM3
RND3
GNLY
SERPING1
SLC9A3R1
MYL6
MGP
SLFN5
HOXB7
RESF1
IFI27
SRGAP3
PNN
MT-CO1
EPB41L2
MT-ND3
B4GALT1
SMAD9
FRMD4B
RPL21
SHROOM3
C1S
EFNA1
NBL1
HLA-DRA
GCLC
TES
GTF2I
VAMP8
ABHD11
SPATA13
CAV1
MAP2K6
SLC34A2
MICOS10
AL121944.1
CYB5A
C20orf27
CCDC146
ZMYND8
PLPP1
MED24
CP
RPL36A
BHLHE40
AMD1
PLIN2
EEF1E1
SNHG6
TPM1
CD248
LEFTY2
HMGB1
ZFHX3
SERPINF1
APOD
PCOLCE
SFN
MT-CO2
EVA1B
PTGDS
ISLR
PRLR
ARC
ADRA2C
TWIST2
OXR1
PFKFB3
ACTB
SNHG3
GALNT7
CD63
SOX4
DKK1
TGFB1I1
TIMP1
NUCKS1
CCDC71L
RBM47
ANXA1
JUNB
ATP5IF1
JUP
APCDD1
WDR77
CCN1
FTH1
SDC4
HSPD1
ARID5B
TNFRSF10B
DNAJC15
XPR1
BTG2
S100A4
SLPI
LDHB
ELP3
MCCC2
SERINC5
PHACTR4
TNFSF10
NUPR1
CLEC2B
COL6A1
PLAT
TKT
MYL6B
EPHA2
ZEB1
MT-ATP8
GADD45G
EFEMP1
ABRACL
PAEP
CRYAB
PNRC1
MT-ND4
RPL17
ATP5MC3
MIDN
PDLIM2
TXN
H3F3A
GAPDH
CAVIN1
MRPL33
WNT4
MT1G
LGMN
PPP1R14A
AXL
THSD4
HMGN3
VIM
INAFM1
NID1
LIF
RPS21
GABPB1-AS1
GCNT1
ALCAM
RAP1B
GGCT
RPS26
PKM
HTRA1
SEPTIN2
SPARCL1
SEC14L1
HNRNPA3
CDKN1C
LDLR
[truncated: 7,393 more rows]
