# Supplementary material for: Molecular Mechanisms of Endometriosis Revealed Using Omics Data
Source: Biomedicines. 2023 Aug 7;11(8):2210. doi: 10.3390/biomedicines11082210 (PMC10452455; doi:10.3390/biomedicines11082210)
Supplement: Supplementary file 1 [file biomedicines-11-02210-s001.zip › Supplementary Table S11.xlsx]

## Sheet: scs.genes.gobp.sig.re
GOBP	Gene	OR	P value
GOBP_REGULATION_OF_CELL_DEATH	DNAJB6;PPIF;HIPK3;CDKN1A;NET1;SAP18;CITED2;RACK1;CFDP1;GPNMB;CEBPB;CIB1;LAMTOR5;ARL6IP5;AGR2;IVNS1ABP;TXNIP;PDPN;CFL1;CTSC;RUVBL2;GADD45G;MORF4L1;PRDX3;ERP29;FERMT2;CHGA;CORO1A;FSTL1;PARK7;PHB2;CARD16;PTPMT1;OMA1;ADCYAP1R1;TWIST2;CLU;PLK3;HSPB6;OSR1;COMP;ADM;NCOA7;PACRG;CLDN7;CRYAB;CSF1R;CCN2;CTNNA1;CTNNB1;CTSB;CTSD;CTSH;CTSZ;CYP1B1;AGR3;DAB2;DAD1;DAPK1;DAXX;GADD45A;DDX3X;TLE5;RASSF6;NQO1;TSC22D3…	4.9549	1.87e-125
GOBP_CELL_MOTILITY	CDH2;CD24;PDCD6;ARPC5;ARPC3;ARPC2;WASF2;TRIB1;NET1;CITED2;RACK1;GPNMB;SEMA6B;SEMA3C;CIB1;CXCL13;PDPN;SPINT2;GIPC1;SDCCAG8;TUBGCP2;FERMT2;CHGA;CORO1A;FSTL1;PHB2;EFHC1;CTHRC1;LRG1;TWIST2;JAML;PODN;COL1A1;COL3A1;COL5A1;LRRC15;CLDN4;CLDN3;CLDN7;CSF1R;CSF3R;CFAP54;CSNK2B;CFAP52;APCDD1;CCN2;CTNNA1;CTNNB1;ADRA2A;TEKT4;CTSH;CXADR;CFAP206;CYP1B1;DAB2;DNAAF4;DCN;TTLL9;GADD45A;DDT;DEFB1;ARX;DNAH5;DNAH6;DPP4…	4.76649	3.18e-124		GOBP: gene ontology biological process
GOBP_TISSUE_DEVELOPMENT	CDH2;CD24;PDCD6;NAMPT;SPRY1;CCNO;KLF2;CITED2;TUBB3;BASP1;SEMA6B;CEBPB;SEMA3C;DDX17;AGR2;DNPH1;PDLIM5;TXNIP;PDPN;POSTN;SPINT2;KDM5B;VAMP5;TMED2;FERMT2;TRIOBP;PLAAT3;CHI3L1;FSTL1;AKAP13;PHB2;VASN;CTHRC1;OSR2;LRG1;DNAAF1;CCDC78;CNN3;COL1A1;COL1A2;COL3A1;COL4A1;PIFO;COL4A2;COL5A1;COL5A2;COL6A1;COL8A1;COL11A1;COL12A1;OSR1;COL15A1;COMP;ADM;MTPN;CLDN3;CRABP2;CRIP1;MYL6B;SELENOM;CSF1R;CSNK2B;CSRP1;CSRP2;…	4.50185	7.47e-124		Gene: common genes between input genes and genes of a gene set
GOBP_APOPTOTIC_PROCESS	CD24;PDCD6IP;PDCD6;DNAJB6;PPIF;HIPK3;CDKN1A;NET1;SAP18;CITED2;RACK1;CFDP1;C1D;CEBPB;CIB1;LAMTOR5;ARL6IP5;SIVA1;IVNS1ABP;TXNIP;PDPN;CFL1;CTSC;AHCYL1;RUVBL2;BLCAP;GADD45G;MORF4L1;PRDX3;KDELR1;ERP29;CORO1A;CHI3L1;FSTL1;PARK7;PHB2;GABARAP;NLRP3;CARD16;PTPMT1;OMA1;TWIST2;CLU;PLK3;HSPB6;DRAM2;OSR1;COMP;ADM;CLDN7;CRIP1;CRYAB;CSF1R;CTNNA1;CTNNB1;CTSB;CTSD;CTSH;CTSL;CYP1B1;PRUNE2;DAB2;DAD1;DAPK1;DAXX;GADD…	4.574	1.14e-123		OR: odds ratio
GOBP_ORGANONITROGEN_COMPOUND_BIOSYNTHETIC_PROCESS	OST4;NAMPT;TOB1;AASS;EIF1;RAMP1;EIF1B;TNIP1;AKR1A1;ABCA8;RACK1;CDS1;ST3GAL6;ATP5PD;EIF3M;ATP5MG;IGF2BP2;OGA;PGRMC1;TMED2;RPL35;PARK7;CKB;CIRBP;MRPL54;CHCHD1;MRPL52;SLC51B;MSI2;NDUFA11;MTPN;CTNNB1;CYP1B1;DAD1;DAPK1;DBI;DDX3X;SGMS2;SPTSSA;DIO2;SLC26A2;EEF1A1;EEF1B2;EEF1D;EEF1G;EEF2;EIF1AX;EIF4A1;EIF4A2;EIF4B;EIF4E;EIF4G2;EIF5;EIF5A;KRTCAP2;RPL22L1;ENO1;ALAS2;ALDH1A1;ALDH2;FABP5;ACSL1;ACSL3;ACSL4;PT…	4.41451	8.35e-111
GOBP_CELL_ADHESION	CDH2;CD24;DNAJB6;CDH11;ARPC2;MPZL2;MSLN;LILRB2;TNIP1;CITED2;MYL9;SPON2;SPON1;CFDP1;GPNMB;CEBPB;FBLN5;CIB1;AGR2;CXCL13;SORBS1;PDLIM5;MYL12A;PDPN;POSTN;SPINT2;HSPH1;FGL2;FERMT2;TRIOBP;CORO1A;NLRP3;LRG1;CLIC1;JAML;CNN3;COL1A1;COL3A1;COL5A1;COL6A1;COL6A2;COL6A3;COL8A1;COL12A1;COL15A1;COL16A1;COMP;MAP3K8;EMB;CLDN4;CLDN3;CLDN7;CSF3R;C2CD4A;VCAN;CSRP1;CSTA;CCN2;CTNNA1;CTNNB1;CTNND1;CCDC80;IGSF11;CXADR;C…	4.66424	2.35e-105
GOBP_RESPONSE_TO_OXYGEN_CONTAINING_COMPOUND	ARPC1B;ACTR2;PPIF;NAMPT;AKAP9;TRIB1;NET1;LILRB2;TNIP1;AKR1A1;KLF2;RACK1;SPON2;CEBPB;FBLN5;LAMTOR5;CXCL13;SORBS1;TXNIP;POSTN;NUDC;AHCYL1;RUVBL2;PRDX3;HNRNPA0;RAB31;IRAK3;PARK7;PHB2;NLRP3;CARD16;FBXO32;ADCYAP1R1;TWIST2;PLK3;COL1A1;COL1A2;ADH5;COL3A1;COL4A1;COL5A2;COL6A1;COL6A2;OSR1;COL16A1;ADM;CLDN4;CLDN3;CLDN7;ROMO1;CRYAB;CCN2;CTNNA1;CTNNB1;ADRA2A;CTSH;CTSK;CYBA;CYBB;CYP1B1;CD55;DAPK1;NQO1;DIO2;JA…	4.29889	1.02e-99
GOBP_BIOLOGICAL_PROCESS_INVOLVED_IN_INTERSPECIES_INTERACTION_BETWEEN_ORGANISMS	TANK;CD24;ACTR2;TRIB1;IGHV1-69D;LILRB2;TNIP1;CRISP3;TUBB4B;WFDC2;IFITM3;SPON2;CLEC10A;CEBPB;DDX17;LAMTOR5;CXCL13;SIVA1;NPC2;GNLY;IFITM2;HEXIM1;IVNS1ABP;CFL1;MASP2;FGL2;PRDX3;HNRNPA0;ADAMTS5;CHGA;PLAAT3;CORO1A;CHIT1;IRAK3;PHB2;NLRP3;CARD16;LRG1;CLU;SLC15A4;ADH5;LRRC15;OCIAD2;ADM;CLDN3;ROMO1;CSF1R;SLFN13;CTSB;CTSL;CCDC80;CXADR;CYBA;CYBB;CD55;DAPK1;DDX3X;DEFB1;CFD;DIO2;DPP4;EDN1;EDNRB;EEF1A1;EEF1G;E…	4.23343	1.48e-98
GOBP_REGULATION_OF_CELL_POPULATION_PROLIFERATION	CDH2;CD24;PDCD6;COX17;NAMPT;TOB1;TRIB1;SPRY1;CDKN1A;CDKN1C;LILRB2;CITED2;CFDP1;IFI30;N4BP2L2;GPNMB;CEBPB;CIB1;PRDX4;TXNIP;PDPN;SPINT2;KDM5B;PRDX3;BTG3;FERMT2;CORO1A;PHB2;CTHRC1;OSR2;LRG1;CLU;JAML;CNN1;PODN;OSR1;COMP;ADM;CLDN3;CLDN7;CRIP2;ROMO1;CSF1R;CSF2RA;CSNK2B;CCN2;CTNNA1;CTNNB1;ADRA2A;COPS9;CTSH;CXADR;CYBA;CYP1B1;FMC1;DAB2;CD55;ARX;DLX5;DPP4;DPT;JAG1;DUSP1;GPR183;ECM1;EDN1;EDNRB;EGR1;AHR;EGR3…	4.12521	6.22e-97
GOBP_RESPONSE_TO_ENDOGENOUS_STIMULUS	CD24;ARPC1B;ACTR2;NAMPT;TOB1;AKAP9;SPRY1;RAMP1;STUB1;CDKN1C;KLF2;CITED2;CEBPB;CIB1;DDX17;LAMTOR5;CXCL13;SLC34A2;SORBS1;TXNIP;SPINT2;NUDC;PTGES3;GIPC1;KDM5B;AHCYL1;EHD1;FERMT2;RAB31;CORO1A;FSTL1;PARK7;PHB2;FBXO32;VASN;LRG1;TWIST2;COL1A1;COL1A2;COL3A1;COL4A1;COL4A2;COL5A2;COL6A1;COL16A1;COMP;ADM;CLDN4;CSNK2B;CCN2;CTNNA1;SRARP;CTNNB1;ADRA2A;CTSB;CTSH;CTSK;CTSL;CTSS;CYBA;CYBB;CYP1B1;DAB2;DNAAF4;DAXX;…	4.1145	4.22e-90
GOBP_CELL_PROJECTION_ORGANIZATION	CDH2;CDH11;ARPC5;ACTR2;ARPC2;WASF2;CCNO;TUBB3;SEMA6B;SEMA3C;CIB1;CDC42EP3;PDLIM5;PDPN;CFL1;SDCCAG8;EHD1;IFT27;TRIOBP;KIF3A;CORO1A;IFT43;C12orf57;CTHRC1;RAB3IP;CFAP70;FGD4;AK7;DNAAF1;CCDC78;UBXN10;PIFO;ADM;EMB;CRABP2;CSF1R;CFAP54;CFAP52;CTNNA1;CTNNB1;LCA5L;TEKT4;CUX1;CFAP206;IQUB;DAB2;DNAAF4;LCA5;ARX;DLX5;DNAH5;DNAH9;DPYSL2;DPYSL3;EDN1;EDNRA;EFNA1;RILPL2;EPHA2;AIF1;DZIP1L;SPAG17;CFAP221;EMP1;EMP3;…	4.19384	6.5e-90
GOBP_NEGATIVE_REGULATION_OF_CELL_DEATH	DNAJB6;PPIF;HIPK3;CITED2;RACK1;CFDP1;GPNMB;CEBPB;CIB1;LAMTOR5;AGR2;IVNS1ABP;PDPN;CFL1;PRDX3;FERMT2;CHGA;CORO1A;FSTL1;PARK7;PHB2;CARD16;ADCYAP1R1;TWIST2;CLU;PLK3;HSPB6;OSR1;COMP;NCOA7;PACRG;CLDN7;CRYAB;CSF1R;CCN2;CTNNA1;CTNNB1;CTSH;AGR3;DAB2;DAD1;DAPK1;DDX3X;NQO1;TSC22D3;EDN1;EDNRB;HIGD2A;EFNA1;EGR3;AIF1;CTTN;ENO1;ERBB3;MECOM;EVI2B;EYA2;PTK2B;DKK1;FOXO1;FLNA;ARL6IP1;PRAME;DDAH2;ALOX12;RNF144B;TNFA…	5.18778	1.51e-87
GOBP_CELLULAR_RESPONSE_TO_STRESS	TANK;PDCD6;DNAJB6;ACTR2;PPIF;HIPK3;PDIA6;PIGBOS1;TRIB1;CDKN1A;STUB1;NET1;KLF2;CITED2;RACK1;CLGN;CEBPB;FBLN5;CIB1;CEBPD;PRDX4;ARL6IP5;AGR2;CETN2;RUVBL2;GADD45G;MORF4L1;PRDX3;SEC61B;TMED2;ERP29;PARK7;PHB2;GABARAP;GABARAPL2;NLRP3;CARD16;VASN;OMA1;CLU;ERP27;PLIN2;PLK3;UBXN10;COMT;SPATA18;ADM;NCOA7;PACRG;CRIP1;ROMO1;CRYAB;CREB3L4;CCN2;CTNNA1;CTNNB1;CTSK;CYBB;CYP1B1;MCMDC2;DAPK1;DAXX;GADD45A;DDX3X;DDX5…	3.67129	8.27e-86
GOBP_DEFENSE_RESPONSE	TANK;ACTR2;IGHV1-69D;LILRB2;TNIP1;CRISP3;TUBB4B;WFDC2;IFITM3;SPON2;CLEC10A;CEBPB;DDX17;CXCL13;GNLY;IFITM2;HEXIM1;MASP2;CTSC;FGL2;HNRNPA0;ADAMTS5;CHGA;CORO1A;CHI3L1;IRAK3;PARK7;PHB2;MGLL;NLRP3;CLU;SLC15A4;ADM;ROMO1;CSF1R;CSF3R;C2CD4A;SLFN13;CST3;ADRA2A;CYBA;CYBB;CD55;DAPK1;DDT;DDX3X;DEFB1;CFD;DPP4;AGTR2;ECM1;EDN1;AHCY;EDNRB;EPHA2;EIF4E;AIF1;ELF3;A2M;TUBB;EREG;ESR1;F3;PTK2B;FAU;MPEG1;FCER1G;FCN1;FG…	3.81592	8.95e-86
GOBP_EPITHELIUM_DEVELOPMENT	CDH2;CD24;SPRY1;CCNO;KLF2;CITED2;BASP1;CEBPB;SEMA3C;AGR2;DNPH1;TXNIP;PDPN;SPINT2;KDM5B;TMED2;FERMT2;TRIOBP;PLAAT3;FSTL1;PHB2;CTHRC1;LRG1;DNAAF1;CCDC78;CNN3;COL4A1;PIFO;COL5A1;OSR1;COL15A1;ADM;CLDN3;CSF1R;CSNK2B;APCDD1;CSTA;CTNNB1;CTSB;CTSH;CTSZ;DAB2;ARX;DLX5;JAG1;DSP;AGTR2;EDN1;EDNRA;EDNRB;RILPL2;EPHA2;DZIP1L;ELF3;ENG;TUBB;EREG;ESR1;STOX1;ALDH1A3;FGF7;DKK1;FOXJ1;PALLD;CLUAP1;FLG;KDM6B;FLNA;FLNB;S…	4.57175	1.24e-82
GOBP_CIRCULATORY_SYSTEM_DEVELOPMENT	CDH2;PDCD6;WASF2;SPRY1;CDKN1A;RAMP1;KLF2;CITED2;BASP1;GPNMB;SEMA3C;CIB1;CXCL13;PDLIM5;HEXIM1;PDPN;TMED2;CNTRL;CHI3L1;ADAMTS6;AKAP13;LRG1;DNAAF1;HSPB6;COL1A1;COL1A2;COL3A1;COL4A1;PIFO;COL4A2;COL5A1;COL8A1;COL11A1;OSR1;COL15A1;COMP;ADM;CPE;CRIP1;CCN2;CTNNB1;CTSH;CXADR;CYBB;CYP1B1;DNAAF4;DCN;GADD45A;DNAH5;JAG1;DSG2;DSP;DUSP6;ECM1;EDN1;EDNRA;EFNA1;EGR1;AHR;EGR3;EPHA2;ELN;ENG;HIPK1;ERBB3;EREG;F3;PTK2B…	4.56663	1.53e-82
GOBP_REGULATION_OF_IMMUNE_SYSTEM_PROCESS	CD24;TRIB1;CDKN1A;IGHV1-69D;LILRB2;TNIP1;SPON2;GPNMB;CEBPB;CIB1;CXCL13;HEXIM1;MASP2;CTSC;HSPH1;HCST;FGL2;CORO1A;IRAK3;PARK7;PHB2;NLRP3;CLU;SLC15A4;COL3A1;MAP3K8;CSF1R;CSF3R;CTNNB1;CTSH;CTSS;CYBA;BTNL9;CD55;DDT;DDX3X;CFD;DPP4;JAG1;TSC22D3;DUSP1;GPR183;ECM1;EDN1;AHR;EGR3;AIF1;ELF1;A2M;EREG;ESR1;EVI2B;PTK2B;FBN1;FCER1A;FCER1G;FCGR2A;FCGR3B;FCN1;FGR;FKBP1A;ZBTB1;FOXJ1;FOXO3;PLCB1;FN1;FOS;FPR1;LY96;CA…	4.05799	3.25e-82
GOBP_CYTOSKELETON_ORGANIZATION	PDCD6IP;DNAJB6;ARPC5;ARPC3;ARPC1B;ACTR2;ARPC2;AKAP9;WASF2;SPRY1;CDK2AP2;TUBA1B;TUBB3;TUBB4B;MYL9;CIB1;TACC2;SORBS1;CDC42EP3;PDLIM5;CETN2;CFL1;NUDC;IQGAP2;SDCCAG8;TUBGCP2;FERMT2;DSTN;CNTRL;TRIOBP;KIF3A;CORO1A;AKAP13;CAVIN3;GABARAP;SYNPO;EFHC1;ADD3;FGD4;DNAAF1;CCDC78;PLK3;CNN1;CNN3;PLEKHH2;MTPN;CLDN3;CRYAB;CSF1R;CSRP1;CSRP2;CCN2;CTNNA1;CTNNB1;ADRA2A;CXADR;CFAP206;DNAAF4;TTLL9;GADD45A;TOGARAM2;DES;D…	4.05445	3.9e-82
GOBP_IMMUNE_RESPONSE	TANK;CD24;ACTR2;PRG4;IGSF6;IGHV1-69D;LILRB2;TNIP1;CRISP3;TUBB4B;WFDC2;IFITM3;SPON2;CLEC10A;CEBPB;SEMA3C;CXCL13;GNLY;IFITM2;HEXIM1;MASP2;CTSC;HCST;FGL2;CHGA;CORO1A;CHIT1;IRAK3;PARK7;PHB2;NLRP3;CLU;SLC15A4;COL3A1;CRIP1;ROMO1;CSF1R;CTSH;CTSK;CTSL;CTSS;CYBA;BTNL9;CYBB;CD55;DAPK1;DDX3X;DEFB1;CFD;JAG1;GPR183;ECM1;EDN1;AHCY;AHR;AIF1;ELF1;A2M;GAPT;TUBB;EREG;ESR1;ALCAM;PTK2B;FAU;MPEG1;FCER1A;FCER1G;FCGR2A…	3.56439	6.91e-80
GOBP_NEGATIVE_REGULATION_OF_RESPONSE_TO_STIMULUS	CDH2;TANK;PDCD6;PPIF;HIPK3;TOB1;TRIB1;SPRY1;STUB1;TNIP1;RACK1;SEMA6B;SEMA3C;CIB1;CXCL13;IVNS1ABP;RUVBL2;FGL2;IRAK3;CAVIN3;PARK7;PHB2;NLRP3;CARD16;VASN;CTHRC1;CLU;COL3A1;ADM;NCOA7;CLDN3;APCDD1;CTNNA1;CTNNB1;ADRA2A;CTNND1;CNKSR3;ADRB3;DAB2;CD55;DCN;DDT;DDX3X;TLE5;DPP4;RCAN1;DUSP1;DUSP2;DUSP6;AGTR2;ECM1;EDN1;EFNA1;EGR1;AHR;EPHA2;AIF1;ELF1;A2M;CTTN;ENDOG;ENO1;ERBB3;ESR1;MECOM;EYA2;FBLN1;FBN1;FGR;FKBP…	3.77679	8.01e-80
GOBP_TUBE_DEVELOPMENT	CDH2;CD24;PDCD6;WASF2;SPRY1;RAMP1;KLF2;CITED2;BASP1;GPNMB;SEMA3C;CIB1;AGR2;CXCL13;PDPN;SPINT2;PTGES3;KDM5B;SDCCAG8;TMED2;CHI3L1;PHB2;CTHRC1;LRG1;DNAAF1;HSPB6;COL3A1;COL4A1;PIFO;COL4A2;COL8A1;OSR1;COL15A1;COMP;ADM;CSF1R;CSNK2B;CCN2;CTNNB1;CTSH;CTSZ;CYBB;CYP1B1;DCN;GADD45A;JAG1;AGTR2;ECM1;EDN1;EDNRA;EDNRB;EFNA1;EGR3;EPHA2;EIF4E;DZIP1L;EMX2;ENG;HIPK1;EREG;ESR1;F3;PTK2B;STOX1;FGF7;FOXJ1;CLUAP1;FLNA;S…	4.5892	8.49e-80
GOBP_LOCOMOTION	PDCD6;TRIB1;CITED2;TUBB3;RACK1;GPNMB;SEMA6B;SEMA3C;CIB1;CXCL13;PDPN;SPINT2;FERMT2;CHGA;CORO1A;TWIST2;JAML;PODN;COL1A1;COL3A1;LRRC15;EMB;CLDN4;CLDN3;CLDN7;CSF1R;CSF3R;CSNK2B;CTNNA1;ADRA2A;CTSH;CXADR;CFAP206;CYP1B1;DAB2;DCN;GADD45A;DDT;DEFB1;ARX;DLX5;DPP4;DPYSL2;DPYSL3;JAG1;RCAN1;DUSP1;AGTR2;GPR183;ECM1;EDN1;EDNRA;EDNRB;EFNA1;EGR3;EPHA2;AIF1;ENG;EPHB6;ALCAM;F3;PTK2B;FBLN1;FCER1G;SPATA13;PHACTR1;FGF…	4.0623	6.48e-79
GOBP_POSITIVE_REGULATION_OF_MULTICELLULAR_ORGANISMAL_PROCESS	PDCD6;ACTR2;TRIB1;SPRY1;LILRB2;CITED2;RACK1;BASP1;SPON2;CEBPB;CIB1;LAMTOR5;PDPN;CFL1;KDM5B;GADD45G;FERMT2;CHGA;CHI3L1;IRAK3;PARK7;NLRP3;OMA1;OSR2;LRG1;CLU;HSPB6;COL1A1;OSR1;ADM;MTPN;CRABP2;CSF1R;CCN2;CTNNB1;ADRA2A;CTSH;CUX1;CYBA;CYBB;CYP1B1;ADRB3;DAB2;CD55;DDT;DDX3X;ARX;DIO2;JAG1;AGTR2;ECM1;EDN1;EDNRB;EGR1;EGR3;AIF1;CTTN;ENG;ENO1;HIPK1;ERBB3;EREG;EVI2B;F3;FABP5;ACSL1;PTK2B;STOX1;FCER1G;FCN1;FGR;E…	3.91795	8.48e-79
GOBP_REGULATION_OF_CELL_DIFFERENTIATION	CD24;ACTR2;ARPC2;TOB1;TRIB1;SPRY1;LILRB2;CDS1;N4BP2L2;SEMA6B;CEBPB;SEMA3C;CIB1;CEBPD;DDX17;PDPN;FGL2;ADIRF;FERMT2;CCDC85B;TRIOBP;NLRP3;VASN;CTHRC1;LRG1;TWIST2;CLIC1;COL1A1;COL5A1;COL5A2;OSR1;ADM;CRABP2;CSF3R;CCN2;CTNNA1;CTNNB1;TCF23;ADRA2C;CUX1;DAB2;DDX5;CCDC71L;DPYSL2;JAG1;EDN1;EDNRB;EFNA1;EGR3;EIF4E;ENG;EREG;EVI2B;PTK2B;FBLN1;FBN1;EFEMP1;PI16;ZBTB1;DKK1;FOXJ1;FOXO1;FOXO3;FLNA;PLCB1;ATP11A;FN1;M…	3.81273	1.96e-78
GOBP_CYTOPLASMIC_TRANSLATION	RACK1;EIF3M;RPL35;EIF4A1;EIF4A2;EIF4B;EIF5;RPL22L1;FAU;RPL13A;RPL36;PABPC1;EIF3K;HNRNPU;EIF3E;RPSA;RPL10A;YBX1;RPL26L1;EIF3L;PKM;RBM4;RPL3;RPL4;RPL5;RPL6;RPL7;RPL7A;RPL8;RPL9;RPL10;RPL11;RPL12;RPL13;RPL15;RPL17;RPL18;RPL18A;RPL19;RPL21;RPL22;RPL23A;RPL24;RPL26;RPL27;RPL30;RPL27A;RPL28;RPL29;RPL31;RPL32;RPL34;RPL35A;RPL37;RPL37A;RPL38;RPL39;RPL41;RPL36A;RPLP0;RPLP1;RPLP2;RPS2;RPS3;RPS3A;RPS4X;RPS5…	24.5038	3.95e-78
GOBP_POSITIVE_REGULATION_OF_DEVELOPMENTAL_PROCESS	CD24;PDCD6;ACTR2;ARPC2;TRIB1;SPRY1;LILRB2;CITED2;RACK1;CDS1;BASP1;CEBPB;CIB1;CEBPD;AGR2;PDPN;CFL1;KDM5B;EHD1;ADIRF;FERMT2;TRIOBP;CHI3L1;NLRP3;CTHRC1;OSR2;LRG1;CLIC1;HSPB6;COL1A1;OSR1;ADM;CRABP2;CCN2;CTNNB1;CTSH;ADRA2C;CUX1;CYBB;CYP1B1;DAB2;DCN;CCDC71L;ARX;JAG1;AGTR2;ECM1;EDN1;EGR3;ENG;HIPK1;ERBB3;EVI2B;F3;PTK2B;STOX1;ZBTB1;DKK1;FOXJ1;FOXO3;FLNA;PLCB1;COBL;ATP11A;FN1;MACF1;FOS;DDAH1;PLXNB2;NR5A1;X…	4.09876	2.12e-77
GOBP_PEPTIDE_METABOLIC_PROCESS	TOB1;EIF1;EIF1B;TNIP1;RACK1;CPQ;SPON1;EIF3M;ARL6IP5;IGF2BP2;TMED2;RPL35;PARK7;CIRBP;MRPL54;CHCHD1;CLU;MRPL52;MSI2;CPE;MTPN;CPM;CTSH;CTSL;CTSZ;CYP1B1;DAPK1;AEBP1;DDX3X;DIO2;DPP4;EEF1A1;EEF1B2;EEF1D;EEF1G;EEF2;EFNA1;EIF1AX;EIF4A1;EIF4A2;EIF4B;EIF4E;EIF4G2;EIF5;EIF5A;RPL22L1;LVRN;PTK2B;FAU;FOXO3;TNRC6B;TUT4;SEC11A;RPL13A;PPP1R15A;PLXNB2;BACE2;RPL36;GAPDH;PABPC1;SERP1;LSM1;GCLC;GCLM;EIF3K;ANG;GPX4;MR…	4.96232	3.49e-77
GOBP_PROTEIN_CONTAINING_COMPLEX_ORGANIZATION	PET100;PDCD6IP;PDCD6;COX17;ARPC5;ARPC3;ARPC1B;ARPC2;AKAP9;STUB1;RACK1;CLGN;PFDN6;EIF3M;CIB1;CXCL13;CDC42EP3;CELF2;CFL1;PTGES3;TUBGCP2;RUVBL2;EHD1;TMED2;FERMT2;DSTN;TRIOBP;CORO1A;IRAK3;PARK7;NLRP3;KCTD12;OMA1;COX20;AP2M1;CLU;ADD3;PIH1D2;CLNS1A;CLTA;DNAAF1;TRAPPC5;NDUFA11;COL1A2;PLEKHH2;COL16A1;COMP;COX7A2;MTPN;CLDN7;CRYAB;CRYZ;CSNK2B;CYBA;FMC1;DAB2;DNAAF4;DAXX;DDX3X;DNAH5;HIGD2A;EIF4B;EIF5;EIF5A;A…	3.57974	6.77e-77
GOBP_CELLULAR_AMIDE_METABOLIC_PROCESS	TOB1;AASS;EIF1;EIF1B;TNIP1;ABCA8;RACK1;CPQ;SPON1;EIF3M;ARL6IP5;IGF2BP2;TMED2;PLAAT3;RPL35;PARK7;CIRBP;MRPL54;CHCHD1;CLU;MRPL52;MSI2;CPE;MTPN;CPM;CTSH;CTSL;CTSZ;CYP1B1;DAPK1;AEBP1;DDX3X;SGMS2;SPTSSA;DIO2;DPP4;EEF1A1;EEF1B2;EEF1D;EEF1G;EEF2;EFNA1;EIF1AX;EIF4A1;EIF4A2;EIF4B;EIF4E;EIF4G2;EIF5;EIF5A;RPL22L1;LVRN;ACSL1;ACSL3;ACSL4;PTK2B;FAU;FOXO3;TNRC6B;TUT4;SEC11A;FOLR1;RPL13A;PPP1R15A;PLXNB2;BACE2;RP…	4.30803	1.58e-76
GOBP_CELLULAR_RESPONSE_TO_OXYGEN_CONTAINING_COMPOUND	ACTR2;PPIF;NAMPT;AKAP9;TRIB1;NET1;LILRB2;TNIP1;AKR1A1;KLF2;RACK1;SPON2;CEBPB;FBLN5;LAMTOR5;CXCL13;SORBS1;POSTN;AHCYL1;RUVBL2;PRDX3;RAB31;PARK7;PHB2;NLRP3;CARD16;FBXO32;COL1A1;COL1A2;ADH5;COL3A1;COL4A1;COL5A2;COL6A1;OSR1;COL16A1;ROMO1;CTNNA1;CTNNB1;ADRA2A;CYBA;CYBB;CYP1B1;CD55;DAPK1;NQO1;AGTR2;EDN1;EDNRA;EDNRB;EGR1;AHR;EIF4E;AIF1;ENDOG;ERN1;ESD;ESR1;ALDH1A1;PTK2B;FBN1;FOXO1;FOXO3;KDM6B;FLNA;PLCB1;…	4.32918	3.51e-76
GOBP_POSITIVE_REGULATION_OF_SIGNALING	CDH2;CD24;NET1;CDKN1C;LILRB2;KLF2;CITED2;RACK1;GPNMB;CIB1;LAMTOR5;ARL6IP5;AGR2;SORBS1;HEXIM1;CTSC;GIPC1;HCST;GADD45G;ERP29;FERMT2;CHGA;CHI3L1;AKAP13;CAVIN3;PARK7;PHB2;CARD16;LRG1;ADCYAP1R1;SLC15A4;COL1A1;COL3A1;OCIAD2;CSF1R;CSNK2B;CCN2;CTNNA1;SRARP;CTNNB1;ADRA2A;CTSH;ADRA2C;NEK10;IGSF11;CYBA;CYP1B1;ADRB3;DAB2;DCN;GADD45A;DDT;DDX3X;DDX5;DLX5;JAG1;AGTR2;GPR183;ECM1;EDN1;EEF1D;EFNA1;EIF5A;ENG;ERBB3;…	3.61946	1.25e-75
GOBP_REGULATION_OF_INTRACELLULAR_SIGNAL_TRANSDUCTION	CDH2;TANK;CD24;PDCD6;PPIF;HIPK3;SPRY1;NET1;TNIP1;RACK1;GPNMB;CIB1;LAMTOR5;ARL6IP5;HEXIM1;IVNS1ABP;HCST;GADD45G;ERP29;FERMT2;CHI3L1;IRAK3;AKAP13;CAVIN3;PARK7;PHB2;GABARAP;NLRP3;CARD16;PTPMT1;ADCYAP1R1;TAGAP;CLU;SLC15A4;FGD4;PLK3;COL3A1;CSF1R;CCN2;CTNNB1;ADRA2A;EFHB;ADRA2C;NEK10;CNKSR3;ADRB3;DAB2;DCN;GADD45A;DDT;DDX3X;DDX5;RCAN1;DUSP1;DUSP2;DUSP6;GPR183;ECM1;EDN1;EEF1D;EFNA1;EPHA2;EIF5A;ENDOG;ENG;E…	3.55885	1.75e-73
GOBP_CELL_ACTIVATION	CD24;CDKN1A;IGHV1-69D;LILRB2;MYL9;GPNMB;CEBPB;MYL12A;PDPN;CTSC;HSPH1;FGL2;KDELR1;CHGA;CORO1A;PHB2;NLRP3;CLU;CLIC1;JAML;SLC15A4;COL3A1;COMP;KLF6;MAP3K8;CSRP1;CCN2;CTNNB1;ADRA2A;CTSL;ADRA2C;CXADR;CD55;DGKH;DPP4;GPR183;EDN1;EGR1;AHR;EGR3;AIF1;GAPT;PTK2B;FCER1G;FGR;FKBP1A;ZBTB1;CD93;FOXJ1;FOXO3;FLNA;PLCB1;FN1;CADM1;ALOX12;XRCC6;TMEM98;GAS6;GATA2;CLEC4E;ABL2;PRELID1;GCLC;GCLM;GNAS;IGHV6-1;IGHV5-51;IGH…	4.37435	2.95e-73
GOBP_CELLULAR_RESPONSE_TO_ENDOGENOUS_STIMULUS	ACTR2;NAMPT;TOB1;AKAP9;SPRY1;RAMP1;STUB1;CDKN1C;KLF2;CITED2;CEBPB;CIB1;DDX17;LAMTOR5;CXCL13;SORBS1;SPINT2;PTGES3;GIPC1;KDM5B;AHCYL1;EHD1;FERMT2;RAB31;CORO1A;FSTL1;PARK7;PHB2;FBXO32;VASN;LRG1;COL1A1;COL1A2;COL3A1;COL4A1;COL4A2;COL5A2;COL6A1;COL16A1;COMP;CSNK2B;CCN2;CTNNA1;SRARP;CTNNB1;ADRA2A;CTSB;CTSH;CTSK;CTSL;CTSS;CYBA;CYBB;CYP1B1;DAB2;DNAAF4;DAXX;DDX5;DLX5;AGTR2;EDN1;EDNRA;EEF1A1;EGR1;AHR;EGR3;…	3.87996	2.19e-70
GOBP_POSITIVE_REGULATION_OF_GENE_EXPRESSION	FTX;TOB1;LILRB2;CITED2;SPON2;SPON1;CEBPB;LAMTOR5;AGR2;IGF2BP2;KDM5B;HNRNPA0;TMED2;ERP29;KCNQ1OT1;CHI3L1;IRAK3;PARK7;PHB2;NLRP3;CIRBP;OSR2;CLU;CLNS1A;OSR1;CLDN3;CSF1R;CCN2;CTNNB1;ADRA2A;TCF23;CTSH;CYBA;CYBB;CYP1B1;CD55;DDT;DDX3X;DDX5;ARX;DLX5;EEF2;EGR1;EIF5A;AIF1;ENG;ENO1;ERBB3;EREG;ERN1;ESR1;F3;PTK2B;STOX1;FCER1G;FCN1;FGF7;FGR;DKK1;SULF1;PLCB1;FN1;LY96;PPP1R15A;PLXNB2;CADM1;NR5A1;FUS;GAPDH;ZBTB20…	4.21866	2.78e-70
GOBP_TUBE_MORPHOGENESIS	CDH2;PDCD6;WASF2;SPRY1;RAMP1;KLF2;CITED2;GPNMB;CIB1;AGR2;CXCL13;SPINT2;KDM5B;SDCCAG8;TMED2;CHI3L1;PHB2;CTHRC1;LRG1;DNAAF1;HSPB6;COL3A1;COL4A1;COL4A2;COL8A1;OSR1;COL15A1;COMP;ADM;CSF1R;CSNK2B;CCN2;CTNNB1;CTSH;CTSZ;CYBB;CYP1B1;DCN;GADD45A;JAG1;AGTR2;ECM1;EDN1;EDNRA;EFNA1;EGR3;EPHA2;EMX2;ENG;HIPK1;EREG;ESR1;F3;PTK2B;STOX1;CLUAP1;FLNA;STAB1;SULF1;COBL;FN1;FOLR1;TSPAN12;DDAH1;PLXNB2;CLIC4;TIPARP;IFT17…	4.72031	8.96e-70
GOBP_REGULATION_OF_RESPONSE_TO_STRESS	DNAJB6;ACTR2;HIPK3;PIGBOS1;TNIP1;RACK1;CEBPB;FBLN5;ARL6IP5;AGR2;HEXIM1;CTSC;RUVBL2;FGL2;GADD45G;MORF4L1;TMED2;ERP29;FERMT2;IRAK3;PARK7;MGLL;NLRP3;CLU;SLC15A4;NCOA7;CLDN4;CLDN3;C2CD4A;CCN2;CTNNB1;ADRA2A;CYBA;GADD45A;DDT;DDX5;DUSP1;EDN1;EDNRB;A2M;ENDOG;ENO1;EREG;ERN1;ESR1;MECOM;EYA2;F3;PTK2B;STOX1;FCN1;FGR;ENPP4;FOXO1;FOXO3;FLNA;PLCB1;DDAH1;PPP1R15A;CADM1;ALOX12;ALOX5AP;FUS;XRCC6;SVIP;SAMHD1;TRAF3I…	3.79742	1.72e-69
GOBP_AMIDE_BIOSYNTHETIC_PROCESS	TOB1;EIF1;EIF1B;TNIP1;ABCA8;RACK1;EIF3M;IGF2BP2;TMED2;RPL35;CIRBP;MRPL54;CHCHD1;MRPL52;MSI2;MTPN;CYP1B1;DAPK1;DDX3X;SGMS2;SPTSSA;DIO2;EEF1A1;EEF1B2;EEF1D;EEF1G;EEF2;EIF1AX;EIF4A1;EIF4A2;EIF4B;EIF4E;EIF4G2;EIF5;EIF5A;RPL22L1;ACSL1;ACSL3;ACSL4;PTK2B;FAU;FOXO3;TNRC6B;TUT4;RPL13A;PPP1R15A;PLXNB2;RPL36;MPC2;GAPDH;PABPC1;SERP1;LSM1;GCLC;GCLM;EIF3K;ANG;MRPS28;COA3;DCPS;MRPL42;MRPL13;MRPL18;ORMDL2;HAGH;H…	4.70311	1.96e-68
GOBP_CELLULAR_MACROMOLECULE_BIOSYNTHETIC_PROCESS	OST4;TOB1;EIF1;RAMP1;EIF1B;TNIP1;RACK1;ST3GAL6;EIF3M;SORBS1;IGF2BP2;OGA;PTGES3;TMED2;RPL35;CIRBP;MRPL54;CHCHD1;MRPL52;SLC51B;MSI2;MTPN;CTNNB1;CYP1B1;DAD1;DAPK1;DBI;DDX3X;DIO2;EEF1A1;EEF1B2;EEF1D;EEF1G;EEF2;EIF1AX;EIF4A1;EIF4A2;EIF4B;EIF4E;EIF4G2;EIF5;EIF5A;KRTCAP2;RPL22L1;ALAS2;PTK2B;FAU;PHLDA1;FOXO3;TNRC6B;PLCB1;TUT4;RPL13A;PPP1R15A;PLXNB2;NUDT14;SVIP;BACE2;RPL36;GALNT3;GAPDH;GCNT1;B4GALT1;PABPC…	4.04333	4.89e-68
GOBP_PEPTIDE_BIOSYNTHETIC_PROCESS	TOB1;EIF1;EIF1B;TNIP1;RACK1;EIF3M;IGF2BP2;TMED2;RPL35;CIRBP;MRPL54;CHCHD1;MRPL52;MSI2;MTPN;CYP1B1;DAPK1;DDX3X;DIO2;EEF1A1;EEF1B2;EEF1D;EEF1G;EEF2;EIF1AX;EIF4A1;EIF4A2;EIF4B;EIF4E;EIF4G2;EIF5;EIF5A;RPL22L1;PTK2B;FAU;FOXO3;TNRC6B;TUT4;RPL13A;PPP1R15A;PLXNB2;RPL36;GAPDH;PABPC1;SERP1;LSM1;GCLC;GCLM;EIF3K;ANG;MRPS28;COA3;DCPS;MRPL42;MRPL13;MRPL18;HAGH;HNRNPU;HSPB1;IGFBP5;EIF3E;RHOA;KRT17;RPSA;CAPRIN1;…	5.09387	8.31e-68
GOBP_NEGATIVE_REGULATION_OF_SIGNALING	CDH2;TANK;PDCD6;PPIF;HIPK3;TOB1;TRIB1;SPRY1;STUB1;LILRB2;TNIP1;RACK1;CIB1;IVNS1ABP;RUVBL2;CHGA;IRAK3;CAVIN3;PARK7;PHB2;NLRP3;CARD16;VASN;CTHRC1;CLU;ADM;APCDD1;CTNNA1;CTNNB1;ADRA2A;CTNND1;CNKSR3;ADRB3;DAB2;DCN;DDX3X;TLE5;RCAN1;DUSP1;DUSP2;DUSP6;AGTR2;ECM1;EDN1;EFNA1;EGR1;EPHA2;ELF1;CTTN;ENDOG;ENO1;ERBB3;ESR1;MECOM;EYA2;PTK2B;FBLN1;FBN1;FKBP1A;DKK1;FOXO1;FOXO3;SULF1;ARC;WWC1;RPGRIP1L;PRAME;TSPAN15;…	3.75185	1.08e-67
GOBP_REGULATION_OF_TRANSPORT	CDH2;PDCD6IP;MRLN;COX17;PPIF;AKAP9;LILRB2;ABCA8;RACK1;LYPLA1;CEBPB;CIB1;ARL6IP5;SORBS1;GIPC1;KDM5B;AHCYL1;EHD1;LMAN2;ERP29;RAB31;CHGA;PKIG;CORO1A;PARK7;PHB2;ADCYAP1R1;AP2M1;CLU;CLIC1;CLIC2;SLC51B;SLC43A2;PLK3;OSR1;CLDN3;TMEM37;CRYAB;CTNNB1;ADRA2A;EFHB;ADRA2C;CTSS;CYBA;CYBB;CNKSR3;DAB2;DAPK1;DBI;EDN1;EDNRA;EDNRB;GRAMD2A;ERBB3;FABP5;ACSL1;ACSL3;ACSL4;PTK2B;LRRC55;FCER1G;FCN1;MAPK15;FGR;FKBP1A;DKK1;…	3.37643	2.99e-67
GOBP_REGULATION_OF_MULTICELLULAR_ORGANISMAL_DEVELOPMENT	CD24;PDCD6;ACTR2;TRIB1;SPRY1;LILRB2;KLF2;CITED2;RACK1;BASP1;GPNMB;SEMA6B;CEBPB;SEMA3C;CIB1;CXCL13;CFL1;CTSC;RUVBL2;FGL2;CHI3L1;NLRP3;OSR2;LRG1;HSPB6;COL4A2;OSR1;COMP;ADM;CRABP2;CSF3R;CCN2;CTNNA1;CTNNB1;CTSH;CTSK;CUX1;CXADR;CYBB;CYP1B1;PHOSPHO1;DCN;GADD45A;SGMS2;JAG1;DUSP6;ECM1;EDN1;EFNA1;EGR3;EPHA2;ENG;HIPK1;EVI2B;F3;PTK2B;FBN1;EFEMP1;PI16;ZBTB1;DKK1;FOXJ1;FOXO3;STAB1;SULF1;PLCB1;FN1;MACF1;FOS;TS…	3.68912	3.73e-67
GOBP_REGULATION_OF_LOCOMOTION	PDCD6;TRIB1;CITED2;RACK1;GPNMB;SEMA6B;SEMA3C;CIB1;CXCL13;PDPN;SPINT2;FERMT2;CORO1A;TWIST2;PODN;COL1A1;COL3A1;LRRC15;CLDN4;CLDN3;CLDN7;CSF1R;CSNK2B;CTNNA1;ADRA2A;CTSH;CFAP206;CYP1B1;DAB2;DCN;GADD45A;DDT;DEFB1;DPP4;DPYSL3;JAG1;DUSP1;AGTR2;GPR183;ECM1;EDN1;EFNA1;EPHA2;AIF1;ENG;F3;PTK2B;FBLN1;SPATA13;PHACTR1;FGF7;MAPK15;FGR;FOXO3;FLNA;SULF1;SYNE2;PLCB1;FN1;MACF1;ZMYND8;FAM89B;PLXNB2;CFAP45;CLIC4;GAS6…	4.18963	3.93e-67
GOBP_RESPONSE_TO_LIPID	ARPC1B;TRIB1;LILRB2;TNIP1;SPON2;CEBPB;DDX17;CXCL13;TXNIP;PTGES3;RUVBL2;PRDX3;HNRNPA0;IRAK3;PARK7;PHB2;NLRP3;CARD16;FBXO32;ADCYAP1R1;COL1A1;ADH5;OSR1;ADM;CLDN4;CRYAB;CCN2;SRARP;CTNNB1;CTSH;CYBA;CYBB;CYP1B1;DAB2;CD55;DNAAF4;DAXX;DDX5;NQO1;DIO2;EDN1;EDNRB;AHR;EIF4E;AIF1;A2M;ENDOG;ENG;ESR1;ACSL1;PTK2B;DKK1;FOXO1;FOXO3;PLCB1;FOS;FOSB;LY96;KANK2;GATA2;GATA4;GATA6;GCH1;ABL2;GJB2;PDCD4;GPX3;GPX4;PYCARD;C…	4.67866	5.31e-67
GOBP_ANATOMICAL_STRUCTURE_FORMATION_INVOLVED_IN_MORPHOGENESIS	PDCD6;WASF2;SPRY1;RAMP1;KLF2;CITED2;MYL9;GPNMB;SEMA3C;CIB1;CXCL13;PDPN;SPINT2;SDCCAG8;EHD1;TMED2;ADAMTS5;CHI3L1;AKAP13;CTHRC1;LRG1;HSPB6;COL1A1;COL3A1;COL4A1;COL4A2;COL5A1;COL5A2;COL6A1;COL8A1;COL11A1;COL12A1;OSR1;COL15A1;ADM;MTPN;CSRP1;CSRP2;CCN2;CTNNB1;CTSH;CYBB;CYP1B1;DCN;GADD45A;DLX5;JAG1;DUSP1;DUSP2;ECM1;EDN1;EDNRA;EFNA1;EGR3;EPHA2;ENG;HIPK1;EREG;ETS2;EYA2;F3;PTK2B;ALDH1A3;FKBP1A;DKK1;FOXJ1;…	3.97617	1.48e-66
GOBP_POSITIVE_REGULATION_OF_MOLECULAR_FUNCTION	TANK;CD24;PDCD6;COX17;AKAP9;RASGRP2;CDKN1A;STUB1;NET1;CNPY2;RACK1;SPON1;CIB1;LAMTOR5;ARL6IP5;CXCL13;AHSA1;PTGES3;PRDX3;ERP29;FERMT2;CHI3L1;IRAK3;AKAP13;PARK7;PHB2;GABARAPL2;NLRP3;CARD16;CTHRC1;CKS2;ADCYAP1R1;CLU;CLIC2;PIFO;MTPN;CLDN4;CLDN3;CSF1R;CCN2;CTNNB1;ADRA2A;CTSD;CTSH;ADRA2C;CTSS;NEK10;RASGEF1B;CYBA;CNKSR3;ADRB3;DAPK1;DAXX;DBI;DDX3X;AGTR2;EDN1;EDNRA;EFNA1;EGR1;EPHA2;C9orf72;EPHB6;ERBB3;EREG…	3.53806	1.78e-66
GOBP_POSITIVE_REGULATION_OF_PROTEIN_METABOLIC_PROCESS	TANK;CD24;PDCD6;TOB1;AKAP9;TRIB1;CDKN1A;RAMP1;STUB1;LILRB2;TNIP1;KLF2;RACK1;SPON1;GPNMB;CIB1;ARL6IP5;CTSC;RUVBL2;ERP29;FERMT2;CHI3L1;AKAP13;PARK7;PHB2;GABARAP;NLRP3;CIRBP;CKS2;CLU;SLC51B;PLK3;MTPN;CLDN4;CLDN3;CSF1R;CSNK2B;CCN2;CTNNB1;ADRA2A;CTSD;CTSH;ADRA2C;NEK10;CYP1B1;DAB2;DAPK1;DAXX;DDX3X;AGTR2;EDN1;EDNRB;EEF2;EFNA1;EGR1;EIF5A;AIF1;CENPX;ENG;ENO1;ERBB3;EREG;ERN1;F3;ACSL1;PTK2B;FBLN1;STOX1;FGF7…	3.61205	1.94e-66
GOBP_REGULATION_OF_CELL_ADHESION	CD24;ARPC2;LILRB2;CITED2;GPNMB;CEBPB;CIB1;AGR2;CXCL13;PDPN;SPINT2;HSPH1;FGL2;FERMT2;TRIOBP;CORO1A;NLRP3;COL1A1;COL8A1;COL16A1;MAP3K8;CLDN7;C2CD4A;CCDC80;CYP1B1;DAB2;CD55;DPP4;JAG1;DUSP1;EFNA1;EGR3;EPHA2;AIF1;ERBB3;PTK2B;FBLN1;FBLN2;ZBTB1;FOXJ1;FOXO3;FLNA;FN1;MACF1;PLXNB2;ALOX12;ABI3BP;GBP1;GCNT1;ABL2;ANK3;RGCC;PYCARD;EFEMP2;ANXA1;HLA-A;HLA-DMA;HLA-DMB;HLA-DPA1;HLA-DPB1;HLA-DQA1;HLA-DQA2;HLA-DQB1;…	4.9907	5.6e-66
GOBP_PROTEOLYSIS	TANK;PDCD6IP;PDCD6;DNAJB6;TRIB1;STUB1;TNIP1;RACK1;CPQ;WFDC2;SPON1;CLGN;LAMTOR5;ARL6IP5;SPINT2;MASP2;CTSC;GIPC1;ADAM28;PRDX3;SEC61B;KLK11;ADAMTS5;PRSS23;ADAMTS6;PARK7;GABARAP;GABARAPL2;LACTB;NLRP3;CARD16;OMA1;CLU;ANAPC16;PLK3;UBXN10;COL6A3;COMP;CPB1;CPE;CLDN4;CLDN3;CPM;CRYAB;CST3;CST6;CSTA;CSTB;CCN2;CTNNB1;ADRA2A;CTSB;CTSD;CTSH;CTSK;CTSL;CTSS;CTSZ;DAB2;DAPK1;DNAAF4;AEBP1;DDX3X;CFD;DPP4;ECM1;EFNA1;…	3.33633	1.14e-65
GOBP_RESPONSE_TO_ABIOTIC_STIMULUS	CDH2;TANK;CD24;PDCD6;DNAJB6;AKAP9;CDKN1A;STUB1;NET1;CITED2;CDS1;TXNIP;PDPN;MAP3K2;RUVBL2;DNAJB4;CHI3L1;PHB2;NLRP3;CARD16;VASN;CIRBP;PLK3;HSPB6;COL1A1;COL3A1;COL11A1;ADM;MTPN;CLDN3;CRIP1;CRYAB;CCN2;CTNNB1;COPS9;CTSS;CYBA;CYBB;ADRB3;DAXX;GADD45A;DDX3X;NQO1;DIO2;DPP4;TSC22D3;EDN1;EDNRA;AHCY;EEF1D;EGR1;AIF1;ENDOG;ENG;ENO1;ALAS2;PTK2B;STOX1;TFEC;ZBTB1;FOXO1;FOXO3;FOS;FOSB;DDAH1;ABCA4;XRCC6;GATA4;GATA6…	4.07802	9.83e-65
GOBP_RESPONSE_TO_CYTOKINE	TANK;CD24;ACTR2;LILRB2;KLF2;TUBA1B;ST3GAL6;IFITM3;CEBPB;CIB1;CXCL13;IFITM2;GIPC1;KDM5B;CORO1A;CHI3L1;IRAK3;CARD16;COL1A1;COL3A1;CSF1R;CSF2RA;CSF3R;CSNK2B;CTSK;CYBA;CYP1B1;DAPK1;TLE5;DPYSL3;DUSP1;ECM1;EDN1;EGR1;EIF4A2;EIF5A;AIF1;ENDOG;HIPK1;EPS8;EREG;ETV3;F3;ACSL1;PTK2B;FCER1G;FOXO3;FLNB;PLCB1;RPL13A;FOS;SAMHD1;GAPDH;GAS6;GBP1;GBP2;GBP3;GCH1;CACYBP;GCLC;GCLM;RBMX;GPD1;GPR17;GPS2;PYCARD;CXCL1;CXCL2…	4.44442	2.18e-62
GOBP_SMALL_MOLECULE_METABOLIC_PROCESS	TSTD1;NAMPT;AASS;AKR1A1;LYPLA1;FAM3C;ECI2;ATP5PD;NPC2;SORBS1;DNPH1;ATP5MG;PTGES3;AHCYL1;ALDH1L1;PLAAT3;SLC2A6;PARK7;MGLL;OMA1;ADCYAP1R1;AK7;ADH1B;NDUFA11;ADH5;MDH1B;ADM;CRABP2;CYP1B1;CYP4B1;DAB2;DBI;SPTSSA;NQO1;DPYSL2;DPYSL3;SLC26A2;ECH1;ECHS1;EDN1;AHCY;EDNRB;EGR1;EPHA2;ENO1;EPHX1;ERH;ESD;ETFB;ALDH1A1;ALDH2;FABP5;ACSL1;ACSL3;ACSL4;PTK2B;ALDH1A3;ALDH3B1;AK9;FDFT1;FDPS;FDXR;ENPP4;SEPHS2;PTGR1;FOXO1…	3.21033	3.67e-62
GOBP_POSITIVE_REGULATION_OF_CELL_DIFFERENTIATION	CD24;ACTR2;ARPC2;TRIB1;LILRB2;CDS1;CEBPB;CIB1;CEBPD;PDPN;ADIRF;FERMT2;TRIOBP;NLRP3;CTHRC1;LRG1;CLIC1;COL1A1;ADM;CRABP2;CCN2;CTNNB1;ADRA2C;CUX1;DAB2;CCDC71L;JAG1;EDN1;EGR3;ENG;EVI2B;ZBTB1;DKK1;FOXJ1;FOXO3;FLNA;PLCB1;ATP11A;FN1;MACF1;FOS;PLXNB2;XRCC6;SPDEF;GAS6;GATA2;GATA4;GATA6;GJA1;GOLGA4;SFN;CRB2;AAMDC;RGCC;EFEMP2;ANXA1;HCLS1;HIF1A;HLA-DRA;HLA-DRB1;HMGB1;HMGB2;HNRNPU;PRMT1;HES1;HSPA1A;HSPA1B;HSP…	4.45842	8.3e-62
GOBP_ORGANELLE_ASSEMBLY	PDCD6IP;ACTR2;CCNO;MYL9;CDS1;CETN2;SDCCAG8;TUBGCP2;EHD1;IFT27;KIF3A;CORO1A;AKAP13;IFT43;GABARAP;GABARAPL2;SYNPO;CIRBP;RAB3IP;CFAP70;DNAAF1;CCDC78;UBXN10;CFAP54;CSRP1;CSRP2;CFAP52;TEKT4;CTSD;CFAP206;IQUB;DNAAF4;TOGARAM2;DDX3X;DNAH5;EDN1;RILPL2;DZIP1L;SPAG17;CFAP221;CENPX;TUBB;C9orf72;CFAP53;RSPH9;PPP1R35;MAPK15;CEP162;MAPRE3;FOXJ1;CLUAP1;FLNA;FLNC;PRRC2C;SYNE2;RPGRIP1L;GABARAPL1;CFAP65;CCDC96;CBY1…	4.30721	1.15e-61
GOBP_CELL_CELL_ADHESION	CDH2;CD24;DNAJB6;CDH11;MPZL2;LILRB2;TNIP1;CITED2;MYL9;GPNMB;CEBPB;CXCL13;PDLIM5;MYL12A;PDPN;SPINT2;HSPH1;FGL2;CORO1A;NLRP3;LRG1;CLIC1;JAML;CNN3;COMP;MAP3K8;EMB;CLDN4;CLDN3;CLDN7;CSRP1;CSTA;CTNNA1;CTNNB1;CTNND1;IGSF11;CXADR;CYP1B1;CD55;DPP4;JAG1;DSC3;DSG2;DSP;EGR3;AIF1;ALCAM;FAT2;CDHR3;ZBTB1;CD93;FOXJ1;PALLD;FOXO3;FLNA;FN1;CD2AP;PLXNB2;CADM1;ALOX12;CLDN15;NEGR1;GCNT1;ABL2;PCDH17;GNAS;CRB2;ANK3;RGC…	4.32411	3.64e-61
GOBP_APOPTOTIC_SIGNALING_PATHWAY	CD24;PDCD6;PPIF;CDKN1A;RACK1;CEBPB;CIB1;ARL6IP5;SIVA1;IVNS1ABP;CTSC;ERP29;PARK7;GABARAP;PTPMT1;CLU;CRIP1;CTNNA1;CTNNB1;CTSH;CYP1B1;DAPK1;DAXX;DDX3X;DDX5;AGTR2;EPHA2;EIF5A;CTTN;ENO1;HIPK1;ERBB3;ERN1;EYA2;FOXO3;PPP1R15A;GATA4;FAM162A;NUPR1;BEX3;PRELID1;GCLC;GCLM;GNAI2;SFN;SLC25A4;PYCARD;SLC25A5;PDIA3;SLC25A6;GSTP1;HIC1;HIF1A;HINT1;HMGB2;HNRNPK;DNAJA1;HSPA1A;HSPA1B;HSPB1;ICAM1;IFI16;IFI27;IGF1;IL1A;…	5.61336	2.17e-60
GOBP_NEUROGENESIS	CDH2;CDH11;ACTR2;TUBB3;SEMA6B;CEBPB;SEMA3C;CIB1;PDLIM5;CFL1;SDCCAG8;TUBGCP2;EHD1;IFT27;TRIOBP;C12orf57;CTHRC1;CLU;COL3A1;ADM;EMB;MTPN;CRABP2;CSF1R;APCDD1;CTNNA1;CTNNB1;ADRA2C;CUX1;DAB2;DNAAF4;ARX;DLX5;DPYSL2;DPYSL3;JAG1;GPR183;EDN1;EDNRA;EDNRB;EFNA1;EPHA2;EIF4E;CTTN;EMX2;C9orf72;HIPK1;EPHB6;ERBB3;ALCAM;ACSL3;ACSL4;PTK2B;PHACTR1;DKK1;PALLD;FOXO3;EPB41L3;FLNA;SYNE2;ARC;COBL;DENND5A;RPGRIP1L;FN1;SUN…	3.29848	2.4e-60
GOBP_RESPONSE_TO_HORMONE	CD24;ARPC1B;NAMPT;RAMP1;CITED2;DDX17;SLC34A2;SORBS1;TXNIP;NUDC;PTGES3;AHCYL1;RAB31;PARK7;PHB2;FBXO32;TWIST2;COL1A1;COL3A1;ADM;CLDN4;CSNK2B;CCN2;CTNNA1;SRARP;ADRA2A;CTSB;CTSH;CTSK;CTSL;CTSS;CYBA;CYBB;CYP1B1;DAB2;DNAAF4;DAXX;CITED4;DDX5;NQO1;AGTR2;EDN1;EDNRA;EDNRB;EGR1;EIF4E;AIF1;A2M;ENG;EREG;ESR1;ACSL1;PTK2B;FBN1;FOXO1;FOXO3;PLCB1;FOS;FOSB;NR5A1;KANK2;GATA6;GCNT1;DNAI1;GJB2;GCLC;GCLM;GNAI2;ANG;TRA…	4.53782	2.95e-60
GOBP_MICROTUBULE_BASED_PROCESS	PDCD6IP;ACTR2;DNAL4;AKAP9;SPRY1;CDK2AP2;TUBA1B;TUBB3;TUBB4B;CIB1;TACC2;CETN2;CFL1;NUDC;SDCCAG8;TUBGCP2;IFT27;KIF3A;IFT43;KIF12;GABARAP;EFHC1;CFAP70;DNAAF1;CCDC78;PLK3;CRYAB;CFAP54;CFAP52;CTNNB1;LCA5L;TEKT4;NEK10;CFAP206;DNAAF4;TTLL9;GADD45A;TOGARAM2;DEFB1;LCA5;DNAH5;DNAH6;DNAH9;DYNC1I2;DNAH10;SPAG17;CFAP221;DNAH12;TUBB;ENKUR;CFAP53;RSPH9;PPP1R35;MAPK15;MAPRE3;FOXJ1;CLUAP1;FLNA;SYNE2;SUN1;MACF1;CF…	4.29661	9.17e-60
GOBP_CELL_PROJECTION_ASSEMBLY	ACTR2;ARPC2;WASF2;CCNO;CDC42EP3;SDCCAG8;EHD1;IFT27;KIF3A;IFT43;RAB3IP;CFAP70;FGD4;DNAAF1;UBXN10;CFAP54;CFAP52;TEKT4;CFAP206;IQUB;DNAAF4;DNAH5;DPYSL3;RILPL2;EPHA2;AIF1;DZIP1L;SPAG17;CFAP221;EMP1;EMP3;CTTN;EPS8;CFAP53;SPATA13;RSPH9;PPP1R35;MAPK15;CEP162;FOXJ1;CLUAP1;FLNA;SYNE2;COBL;RPGRIP1L;CD2AP;CFAP65;CCDC96;CBY1;SPEF1;TRAF3IP1;IFT172;GAS8;SH3YL1;DNAI1;B9D1;INTU;TEKT2;CFAP157;CFAP47;IFT81;CCDC113…	5.47537	8.02e-59
GOBP_POSITIVE_REGULATION_OF_MACROMOLECULE_BIOSYNTHETIC_PROCESS	TSTD1;ACTR2;NAMPT;TOB1;RAMP1;CDKN1C;ZNF267;TNIP1;KLF2;CITED2;CEBPB;CEBPD;DDX17;SORBS1;PTGES3;HSPH1;RUVBL2;SUB1;MORF4L1;ADIRF;PARK7;NLRP3;CIRBP;OSR2;SLC51B;METTL23;COL1A1;OSR1;KLF6;NCOA7;MTPN;CREB3L4;CTNNB1;CYP1B1;DAB2;DAXX;DCN;CITED4;DDX3X;GLIS3;SSBP4;DLX5;JAG1;AGTR2;EDN1;EEF2;EGR1;AHR;EGR3;EIF5A;ELF1;ELF3;ENG;ESR1;ETS2;MECOM;PTK2B;STOX1;FGF7;MAPK15;TFEC;MAPRE3;ELL2;FOXJ1;FOXO1;FOXO3;KDM6B;PLCB1;…	3.0798	8.82e-59
GOBP_VASCULATURE_DEVELOPMENT	CDH2;PDCD6;WASF2;RAMP1;KLF2;CITED2;GPNMB;SEMA3C;CIB1;CXCL13;PDPN;TMED2;CNTRL;CHI3L1;ADAMTS6;LRG1;HSPB6;COL1A1;COL1A2;COL3A1;COL4A1;COL4A2;COL5A1;COL8A1;OSR1;COL15A1;COMP;ADM;CCN2;CTNNB1;CTSH;CYBB;CYP1B1;DCN;GADD45A;JAG1;ECM1;EDN1;EDNRA;EFNA1;EGR1;AHR;EGR3;EPHA2;ENG;HIPK1;EREG;F3;PTK2B;FOXO1;FLNA;STAB1;SULF1;FN1;FOLR1;TSPAN12;DDAH1;CLIC4;TIPARP;GATA2;GATA4;GATA6;B4GALT1;GJA5;B9D1;GPC3;PDCD4;GLUL;A…	4.57731	2.32e-58
GOBP_REGULATION_OF_PROTEOLYSIS	TANK;PDCD6;DNAJB6;TRIB1;STUB1;TNIP1;RACK1;WFDC2;SPON1;LAMTOR5;ARL6IP5;SPINT2;CTSC;GIPC1;PRDX3;PARK7;GABARAP;GABARAPL2;NLRP3;CARD16;CLU;PLK3;COL6A3;CLDN4;CLDN3;CRYAB;CST3;CST6;CSTA;CSTB;CCN2;ADRA2A;CTSB;CTSD;CTSH;CTSZ;DAB2;DAPK1;DNAAF4;DDX3X;ECM1;EFNA1;SERPINB1;A2M;ENO1;F3;PTK2B;FBLN1;PI16;ARL6IP1;FN1;RYBP;HSPBP1;MTCH1;RNF144B;SVIP;TNFAIP8;ARIH1;PRDX5;RNF19A;GAPDH;TMEM98;GAS1;GAS6;FAM162A;NUPR1;BE…	4.80738	2.36e-58
GOBP_POSITIVE_REGULATION_OF_IMMUNE_SYSTEM_PROCESS	CD24;TRIB1;CDKN1A;IGHV1-69D;LILRB2;SPON2;CXCL13;HEXIM1;MASP2;CTSC;HSPH1;CORO1A;IRAK3;PARK7;PHB2;NLRP3;CLU;SLC15A4;MAP3K8;CSF1R;BTNL9;CD55;CFD;DPP4;GPR183;EDN1;EGR3;AIF1;ELF1;A2M;EREG;EVI2B;PTK2B;FCER1G;FCN1;FGR;ZBTB1;FOXJ1;FOXO3;FOS;FPR1;CADM1;FYB1;XRCC6;GAS6;GATA2;GBP1;ABL2;IGHV6-1;IGHV5-51;IGHV4-61;IGHV4-59;IGHV4-39;IGHV4-34;IGHV4-4;IGHV3-74;IGHV3-53;IGHV3-49;IGHV3-48;IGHV3-33;IGHV3-30;IGHV3-23…	4.19011	3.28e-58
GOBP_RESPONSE_TO_BACTERIUM	CD24;TRIB1;IGHV1-69D;LILRB2;TNIP1;WFDC2;SPON2;CEBPB;CXCL13;GNLY;PRDX3;HNRNPA0;ADAMTS5;CHGA;PLAAT3;CHIT1;IRAK3;NLRP3;CARD16;LRG1;ADH5;OCIAD2;ADM;CLDN3;ROMO1;CCDC80;CYBA;CD55;DEFB1;CFD;DIO2;EDN1;EDNRB;EPHA2;FAU;MPEG1;FCER1G;FGR;FKBP5;STAB1;FOS;LY96;LSM5;CLEC4E;GBP2;GCH1;GJB2;GPC3;PDCD4;ANG;IGHV6-1;IGHV5-51;IGHV4-61;IGHV4-59;IGHV4-39;IGHV4-34;IGHV4-4;IGHV3-74;IGHV3-53;IGHV3-49;IGHV3-48;IGHV3-33;IGHV…	4.68169	5.27e-58
GOBP_GENERATION_OF_PRECURSOR_METABOLITES_AND_ENERGY	COX17;PPIF;ATP5PD;SORBS1;ATP5MG;PTGES3;ALDH1L1;UQCR11;SLC2A6;CAVIN3;PARK7;PHB2;ADH1B;NDUFA11;ADH5;MDH1B;COX4I1;COX5B;COX6A1;COX6B1;COX6C;COX7A2;COX7B;COX7C;COX8A;CYB5A;CYB561;CYBA;CYBB;ADRB3;ENO1;ETFB;ALDH2;AK9;FDXR;GABARAPL1;PGLS;GAPDH;ZBTB20;PHGDH;NIPSNAP2;BLOC1S1;NUPR1;UQCRQ;PRELID1;GPD1;SLC25A4;DNAJC15;UQCR10;NOP53;HIF1A;IDH2;IGF1;IL6ST;IDO1;INSR;NDUFS7;RHOA;LDHA;LEP;LEPR;CHCHD10;ARL2;MDH1;MD…	6.08371	9.74e-58
GOBP_NEGATIVE_REGULATION_OF_PROTEIN_METABOLIC_PROCESS	DNAJB6;HIPK3;TOB1;AASS;TRIB1;SPRY1;CDKN1A;CDKN1C;LILRB2;RACK1;WFDC2;SPON1;PFDN6;CIB1;LAMTOR5;HEXIM1;IVNS1ABP;IGF2BP2;SPINT2;GIPC1;PRDX3;TMED2;PKIG;IRAK3;PARK7;GABARAPL2;CARD16;CIRBP;CLU;COL6A3;NCOA7;CRYAB;CST3;CST6;CSTA;CSTB;CTNNB1;COPS9;CTSB;CTSZ;CNKSR3;DAPK1;DBI;GADD45A;DDX3X;NQO1;DUSP1;DUSP6;ECM1;EDN1;EDNRB;EFNA1;EIF4E;SERPINB1;A2M;ENG;C9orf72;FBLN1;PI16;FKBP1A;DKK1;TNRC6B;FLNA;ARL6IP1;TUT4;RY…	3.83012	1.65e-57
GOBP_HOMEOSTATIC_PROCESS	CDH2;CD24;KLF2;CITED2;RACK1;CEBPB;PRDX4;SLC34A2;NPC2;GADD45G;PRDX3;EHD1;CYB561D2;ADAMTS5;CORO1A;FSTL1;PARK7;CKB;OMA1;CLIC2;CLNS1A;SLC15A4;COL3A1;DRAM2;COMP;OCIAD2;ADM;CP;CLDN4;CLDN3;CSF1R;CCN2;CTNNB1;ADRA2A;CTSH;CTSK;CXADR;CYB561;CYBA;ADRB3;NXNL2;DDX3X;LCA5;NQO1;DIO2;TSC22D3;GPR183;EDN1;EDNRA;EDNRB;EGR1;ENDOG;GAPT;ERN1;ALAS2;ALDH1A1;FABP5;ACSL1;PTK2B;FKBP1A;FOXO1;FOXO3;FLG;KDM6B;FLNA;PRND;ALOX12;…	3.18905	1.81e-57
GOBP_ANIMAL_ORGAN_MORPHOGENESIS	CDH2;SPRY1;CITED2;BASP1;CEBPB;SEMA3C;KDM5B;TMED2;TRIOBP;ADAMTS5;C12orf57;PHB2;CTHRC1;OSR2;DNAAF1;COL1A1;COL1A2;COL3A1;COL5A1;COL5A2;COL8A1;COL11A1;OSR1;COMP;ADM;CPE;CRIP1;CSF1R;APCDD1;CCN2;CTNNA1;CTNNB1;CTSH;CTSZ;DAB2;PHOSPHO1;DCN;DLX5;JAG1;DSP;AGTR2;EDN1;EDNRA;EFNA1;EPHA2;ELF3;ELN;EMX2;ENG;HIPK1;STX2;EREG;ESR1;STOX1;ALDH1A3;FBN1;EFEMP1;PPP1R35;FGF7;FGR;FKBP1A;DKK1;FOXJ1;CLUAP1;FOXO3;FLNA;SULF1;R…	3.97304	1.89e-57
GOBP_ACTIN_FILAMENT_BASED_PROCESS	PDCD6IP;DNAJB6;ARPC5;ARPC3;ARPC1B;ACTR2;ARPC2;AKAP9;WASF2;MYL9;SORBS1;CDC42EP3;PDLIM5;PDPN;CFL1;IQGAP2;FERMT2;DSTN;TRIOBP;CORO1A;AKAP13;CAVIN3;SYNPO;ADD3;FGD4;CNN1;CNN3;PLEKHH2;MTPN;CLDN3;MYL6B;CSF1R;CSRP1;CSRP2;CCN2;CTNNA1;ADRA2A;CXADR;DPYSL3;DSG2;DSP;EDN1;AIF1;ELN;CTTN;C9orf72;EPB41L2;EPS8;PTK2B;PHACTR1;FGF7;FOXJ1;PALLD;EPB41L3;FLNA;FLNB;FLNC;SYNE2;COBL;COTL1;CD2AP;GATA4;GJA1;ABL2;GJA5;PDLIM3;A…	4.52953	3.14e-57
GOBP_NEGATIVE_REGULATION_OF_MOLECULAR_FUNCTION	DNAJB6;MRLN;PPIF;HIPK3;AKAP9;TRIB1;SPRY1;CDKN1A;STUB1;CDKN1C;RACK1;WFDC2;CIB1;LAMTOR5;HEXIM1;TXNIP;SPINT2;IQGAP2;PRDX3;TMED2;PKIG;IRAK3;PARK7;PHB2;NLRP3;CARD16;CLIC2;COL6A3;OSR1;CRYAB;PPP1R36;CST3;CST6;CSTA;CSTB;ADRA2A;CTSB;EFHB;CTSZ;CYP1B1;ADRB3;DAB2;GADD45A;DDX3X;TLE5;COMMD6;NQO1;DUSP1;AGTR2;ECM1;EDNRB;EIF4A2;SERPINB1;A2M;C9orf72;ESR1;PI16;PHACTR1;PPP1R35;FKBP1A;DKK1;FOXJ1;FLNA;ARL6IP1;HSPBP1;P…	3.7507	9e-57
GOBP_VESICLE_MEDIATED_TRANSPORT	CDH2;PDCD6IP;PDCD6;AP1M2;ARL4C;WASF2;PRG4;RAMP1;IGHV1-69D;RACK1;SPON2;LYPLA1;CLEC10A;GIPC1;VAMP5;YIF1A;EHD1;KDELR1;TMED2;LMAN2;KDELR2;IFT27;RAB31;CHGA;CORO1A;COPE;GABARAPL2;MAL2;RAB3IP;AP2M1;CLU;CLTA;CLTB;TRAPPC5;OCIAD2;ADM;CTNNB1;ADRA2A;CTSL;CYBA;ADRB3;DAB2;DPP4;DPYSL2;AIF1;CTTN;C9orf72;STX2;ACSL3;FCER1G;FCGRT;FCN1;MAPK15;FGR;COPZ1;SEC31A;CD93;DKK1;FLNA;STAB1;ARC;DENND5A;FOLR1;MACF1;TMEM50A;CD2A…	3.23815	1.19e-56
GOBP_INTRACELLULAR_TRANSPORT	CD24;PDCD6;TOMM6;MRLN;AP1M2;ACTR2;PPIF;ARL4C;CDKN1A;RAMP1;TUBA1B;CIB1;NPC2;TXNIP;MTX2;NUDC;GIPC1;AHCYL1;YIF1A;EHD1;KDELR1;SEC61B;TMED2;LMAN2;ERP29;YWHAQ;KDELR2;IFT27;RAB31;KIF3A;PKIG;CORO1A;RABL2A;AKAP13;IFT43;PARK7;COPE;PHB2;GABARAP;RAB3IP;AP2M1;CLU;CLTA;CLTB;SLC51B;TRAPPC5;PLK3;ROMO1;CRYAB;LCA5L;DAB2;LCA5;DYNC1I2;RILPL2;SPAG17;CTTN;TUBB;C9orf72;STX2;EYA2;MAPK15;COPZ1;SEC31A;CLUAP1;FLNA;ARL6IP1;…	3.26555	1.3e-56
GOBP_REGULATION_OF_HYDROLASE_ACTIVITY	TANK;PDCD6;DNAJB6;RASGRP2;SPRY1;NET1;RACK1;WFDC2;LAMTOR5;ARL6IP5;CXCL13;SPINT2;IQGAP2;PRDX3;TMED2;FERMT2;PARK7;PHB2;NLRP3;CARD16;ADCYAP1R1;FGD4;COL6A3;CLDN4;CLDN3;CRYAB;PPP1R36;CSNK2B;CST3;CST6;CSTA;CSTB;CCN2;CTSB;CTSD;CTSH;RASGEF1B;DAPK1;DDX3X;RCAN1;AGTR2;ECM1;EDNRA;EFNA1;EPHA2;SERPINB1;A2M;C9orf72;ESR1;F3;PTK2B;FBLN1;PI16;PPP1R35;FKBP1A;FOXJ1;ARL6IP1;FN1;PPP1R15A;PLXNB2;MTCH1;TNFAIP8;PRDX5;GAPD…	3.98809	2.55e-56
GOBP_RESPONSE_TO_ORGANIC_CYCLIC_COMPOUND	ARPC1B;ACTR2;AKAP9;KLF2;CEBPB;DDX17;ARL6IP5;TXNIP;PTGES3;RUVBL2;IRAK3;PARK7;PHB2;FBXO32;ADCYAP1R1;TWIST2;PLIN2;COL1A1;ADM;CLDN4;CRYAB;CCN2;CTNNA1;SRARP;CTNNB1;CTSK;CYBA;CYBB;CYP1B1;DAB2;DNAAF4;DAXX;DDX5;NQO1;DUSP6;EDN1;EDNRB;EGR1;AHR;EIF4E;AIF1;A2M;ENDOG;ENG;EPHX1;ESR1;ACSL1;PTK2B;FOXO3;FLNA;PLCB1;FOLR1;FOS;FOSB;KANK2;TIPARP;GATA6;GJB2;GCLC;GCLM;GNA15;GNAS;GPD1;GPX4;RAPGEF1;ANXA1;ANXA3;HMGB2;HNRN…	4.18557	3.35e-56
GOBP_SUPRAMOLECULAR_FIBER_ORGANIZATION	DNAJB6;ARPC5;ARPC3;ARPC1B;ACTR2;ARPC2;AKAP9;WASF2;MYL9;PFDN6;FBLN5;CIB1;SORBS1;CDC42EP3;CFL1;IQGAP2;TUBGCP2;FERMT2;DSTN;TRIOBP;CORO1A;AKAP13;PARK7;SYNPO;CLU;ADD3;PLK3;COL1A1;COL1A2;COL3A1;COL5A1;COL5A2;COL11A1;PLEKHH2;COL12A1;COMP;MTPN;CRYAB;CSRP1;CSRP2;CST3;CCN2;CTNNA1;CYP1B1;AEBP1;DES;DPT;DPYSL3;DSP;EDN1;AIF1;ELN;CTTN;C9orf72;EPS8;PTK2B;PHACTR1;FKBP1A;MAPRE3;FLNA;FLNC;COBL;COTL1;CD2AP;FUS;SPEF1…	4.47442	5.17e-56
GOBP_RESPONSE_TO_WOUNDING	MRLN;CDKN1A;MYL9;PROCR;MYL12A;PDPN;FERMT2;PHB2;LRG1;CLIC1;JAML;COL1A1;COL3A1;COL5A1;COMP;DCBLD2;ADM;CLDN4;CLDN3;CSRP1;CCN2;CTNNA1;ADRA2A;ADRA2C;DGKH;DPYSL3;DSP;EDN1;EDNRA;AIF1;ERBB3;EREG;F3;FBLN1;FCER1G;JMJD1C;FGF7;ENPP4;FLNA;FN1;FOLR1;MACF1;ALOX12;GAS6;GATA2;GATA4;MYOF;B4GALT1;CHMP2A;GNAS;GRN;CHMP4A;ANXA1;ANXA2;HBB;ANXA5;HIF1A;HSPB1;ID3;APOD;IGF1;APOE;CCN1;IL1A;IL6ST;IL10;ILK;ITGA5;ITGB1;ITGB4;J…	5.40321	2.66e-55
GOBP_AEROBIC_RESPIRATION	PPIF;ATP5PD;ATP5MG;UQCR11;PARK7;NDUFA11;MDH1B;COX4I1;COX5B;COX6A1;COX6B1;COX6C;COX7A2;COX7B;COX7C;COX8A;NIPSNAP2;BLOC1S1;NUPR1;UQCRQ;DNAJC15;UQCR10;NOP53;HIF1A;IDH2;NDUFS7;RHOA;CHCHD10;ARL2;MDH1;MDH2;MT-ATP6;MT-ATP8;MT-CO1;MT-CO2;MT-CO3;MT-CYB;MT-ND1;MT-ND2;MT-ND3;MT-ND4;MT-ND4L;MT-ND5;MT-ND6;NDUFA1;NDUFA2;NDUFA3;NDUFA4;NDUFA5;NDUFA7;NDUFA8;NDUFAB1;NDUFB1;NDUFB2;NDUFB3;NDUFB4;NDUFB5;NDUFB6;NDUFB7…	12.57	5.16e-55
GOBP_REGULATION_OF_PROTEIN_MODIFICATION_PROCESS	TANK;CD24;PDCD6;HIPK3;AKAP9;AASS;TRIB1;SPRY1;CDKN1A;RAMP1;STUB1;CDKN1C;LILRB2;CCNO;TNIP1;RACK1;GPNMB;CIB1;HEXIM1;IVNS1ABP;RUVBL2;TMED2;ERP29;FERMT2;CCNI;PKIG;CHI3L1;IRAK3;AKAP13;PARK7;PHB2;GABARAP;CKS2;CLU;SLC51B;NCOA7;CLDN3;CSF1R;CSNK2B;CCN2;CTNNB1;ADRA2A;COPS9;ADRA2C;NEK10;CNKSR3;DAB2;DAXX;DBI;GADD45A;DDX3X;RCAN1;DUSP1;DUSP6;AGTR2;EDN1;EDNRB;EFNA1;EGR1;AIF1;CENPX;ENG;C9orf72;ERBB3;EREG;ERN1;ACS…	3.22013	7.23e-55
GOBP_DEFENSE_RESPONSE_TO_OTHER_ORGANISM	TANK;ACTR2;IGHV1-69D;CRISP3;TUBB4B;WFDC2;IFITM3;SPON2;CLEC10A;CEBPB;DDX17;CXCL13;GNLY;IFITM2;HEXIM1;MASP2;FGL2;ADAMTS5;CHGA;CORO1A;IRAK3;PHB2;NLRP3;CLU;SLC15A4;ROMO1;CSF1R;SLFN13;CYBA;CYBB;CD55;DAPK1;DDX3X;DEFB1;CFD;EDN1;EPHA2;AIF1;A2M;TUBB;EREG;PTK2B;FAU;MPEG1;FCER1G;FCN1;FGR;ZBTB1;STAB1;FLNB;COTL1;RPL13A;LY96;CADM1;XRCC6;SERINC5;SAMHD1;GAPDH;TRAF3IP1;CLEC4E;GATA6;GBP1;GBP2;GBP3;GCH1;PPP1R14B;AN…	3.66525	1.27e-54
GOBP_OXIDATIVE_PHOSPHORYLATION	PPIF;ATP5PD;ATP5MG;UQCR11;PARK7;NDUFA11;COX4I1;COX5B;COX6A1;COX6B1;COX6C;COX7A2;COX7B;COX7C;COX8A;NIPSNAP2;NUPR1;UQCRQ;DNAJC15;UQCR10;NDUFS7;RHOA;CHCHD10;MT-ATP6;MT-ATP8;MT-CO1;MT-CO2;MT-CO3;MT-CYB;MT-ND1;MT-ND2;MT-ND3;MT-ND4;MT-ND4L;MT-ND5;MT-ND6;NDUFA1;NDUFA2;NDUFA3;NDUFA4;NDUFA5;NDUFA7;NDUFA8;NDUFAB1;NDUFB1;NDUFB2;NDUFB3;NDUFB4;NDUFB5;NDUFB6;NDUFB7;NDUFB8;NDUFB9;NDUFC1;NDUFC2;NDUFS5;NDUFS6;NDU…	16.8155	1.62e-54
GOBP_CILIUM_ORGANIZATION	ACTR2;CCNO;SDCCAG8;EHD1;IFT27;KIF3A;IFT43;RAB3IP;CFAP70;DNAAF1;UBXN10;PIFO;CFAP54;CFAP52;LCA5L;TEKT4;CFAP206;IQUB;DNAAF4;LCA5;DNAH5;RILPL2;DZIP1L;SPAG17;CFAP221;CFAP53;RSPH9;PPP1R35;MAPK15;CEP162;FOXJ1;CLUAP1;FLNA;SYNE2;RPGRIP1L;CFAP65;CFAP126;CCDC96;CBY1;SPEF1;TRAF3IP1;IFT172;GAS8;DNAI1;B9D1;INTU;TEKT2;CFAP157;CFAP47;IFT81;CCDC113;GSN;CCDC39;RSPH4A;CFAP100;DNAAF3;DNAJB13;CATIP;ARF4;CFAP73;LAMA5;…	6.6325	1.99e-54
GOBP_REGULATION_OF_ANATOMICAL_STRUCTURE_MORPHOGENESIS	CDH2;PDCD6;ACTR2;ARPC2;SPRY1;KLF2;CITED2;MYL12B;RACK1;CFDP1;GPNMB;SEMA6B;SEMA3C;CIB1;CXCL13;CDC42EP3;PDLIM5;MYL12A;PDPN;CFL1;FERMT2;TRIOBP;CORO1A;CHI3L1;PHB2;OMA1;CTHRC1;LRG1;FGD4;HSPB6;COL4A2;OSR1;ADM;CLDN4;CLDN3;CRABP2;CSF1R;CST3;APCDD1;CTNNB1;CTSH;CUX1;CYBB;CYP1B1;DAB2;DCN;GADD45A;JAG1;AGTR2;ECM1;EDN1;EFNA1;EPHA2;ENG;HIPK1;EPS8;ESR1;F3;PTK2B;FBLN1;STOX1;FGF7;FGR;DKK1;FOXJ1;EPB41L3;FLNA;STAB1;S…	3.95724	8.64e-54
GOBP_REGULATION_OF_PHOSPHORUS_METABOLIC_PROCESS	CD24;HIPK3;AKAP9;TRIB1;SPRY1;CDKN1A;CDKN1C;LILRB2;CCNO;RACK1;GPNMB;CIB1;HEXIM1;PTGES3;PRDX3;TMED2;ERP29;FERMT2;CCNI;PKIG;CHI3L1;SLC2A6;IRAK3;AKAP13;PARK7;PHB2;CKS2;ADCYAP1R1;CLU;PIFO;CLDN3;CSF1R;PPP1R36;CSNK2B;CCN2;ADRA2A;ADRA2C;NEK10;CNKSR3;DAB2;DAXX;GADD45A;DDX3X;RCAN1;DUSP1;DUSP6;AGTR2;EDN1;EDNRB;EEF1A1;EFNA1;EGR1;EPHA2;AIF1;ENG;ENO1;C9orf72;EPHB6;ERBB3;EREG;ERN1;ACSL1;ACSL3;PTK2B;FBLN1;STOX1;…	3.3336	9.9e-54
GOBP_POSITIVE_REGULATION_OF_INTRACELLULAR_SIGNAL_TRANSDUCTION	CDH2;CD24;NET1;RACK1;GPNMB;CIB1;LAMTOR5;ARL6IP5;HEXIM1;HCST;GADD45G;ERP29;FERMT2;CHI3L1;AKAP13;CAVIN3;PARK7;PHB2;CARD16;ADCYAP1R1;SLC15A4;COL3A1;CSF1R;CCN2;CTNNB1;ADRA2A;ADRA2C;NEK10;ADRB3;DCN;GADD45A;DDT;DDX3X;DDX5;GPR183;ECM1;EDN1;EEF1D;EFNA1;EIF5A;ENG;ERBB3;ERN1;F3;PTK2B;STOX1;FGR;FKBP1A;DKK1;FLNA;PLCB1;WWC1;FN1;GAPDH;GAS6;GATA4;NUPR1;GJA1;PDCD4;GNAI2;H19;GPR17;LAMTOR2;PYCARD;GUCY1A2;LMCD1;HCL…	3.90108	1.32e-53
GOBP_REGULATION_OF_CELL_ACTIVATION	CD24;CDKN1A;IGHV1-69D;LILRB2;GPNMB;CEBPB;PDPN;CTSC;HSPH1;FGL2;CORO1A;NLRP3;SLC15A4;MAP3K8;CCN2;CTNNB1;CD55;DPP4;GPR183;AHR;EGR3;AIF1;FCER1G;FGR;ZBTB1;FOXJ1;FOXO3;FLNA;FN1;ALOX12;XRCC6;GAS6;GATA2;ABL2;PRELID1;GCLC;IGHV6-1;IGHV5-51;IGHV4-61;IGHV4-59;IGHV4-39;IGHV4-34;IGHV4-4;IGHV3-74;IGHV3-53;IGHV3-49;IGHV3-48;IGHV3-33;IGHV3-30;IGHV3-23;IGHV3-21;IGHV3-20;IGHV3-15;IGHV3-13;IGHV3-11;IGHV3-7;IGHV2-5;I…	4.65445	2.71e-53
GOBP_RESPONSE_TO_NITROGEN_COMPOUND	ACTR2;NAMPT;AKAP9;STUB1;KLF2;CLGN;CEBPB;LAMTOR5;SORBS1;NUDC;AHCYL1;SEC61B;RAB31;IRAK3;TWIST2;COL1A1;UBXN10;COL1A2;COL3A1;COL4A1;COL5A2;COL6A1;COL16A1;ADM;CCN2;CTNNA1;CTNNB1;CTSK;CYBA;CYBB;CYP1B1;DAXX;NQO1;JAG1;AGTR2;EDN1;EDNRA;EDNRB;EGR1;AHR;AIF1;EREG;PTK2B;FBN1;FCER1G;FOXO1;FOXO3;FLNA;UBXN4;PLCB1;FOLR1;FOS;FOSB;SDF2L1;NR5A1;SVIP;GATA6;GCNT1;GJA1;DNAI1;GJB2;GCLC;GCLM;GNA15;GNAI2;GNAS;GPD1;TRARG1;…	3.66969	2.94e-53
GOBP_POSITIVE_REGULATION_OF_LOCOMOTION	PDCD6;RACK1;GPNMB;SEMA6B;SEMA3C;CIB1;CXCL13;PDPN;FERMT2;CORO1A;TWIST2;COL1A1;LRRC15;CLDN4;CLDN3;CLDN7;CSF1R;ADRA2A;CTSH;CYP1B1;DAB2;DEFB1;EDN1;EPHA2;AIF1;F3;PTK2B;FGF7;FGR;SYNE2;FN1;FAM89B;GAS6;GATA2;ABL2;GNAI2;CAVIN1;GRN;PHPT1;PYCARD;ANXA1;ANXA3;HIF1A;HMGB1;HSPA5;HSPB1;ICAM1;IGF1;IGFBP5;CCN1;IL1A;IL1B;IL1R1;CXCL8;INSR;ITGA6;ITGA3;ITGA5;ITGAX;ITGB1;JUN;MALAT1;RHOA;RHOB;RHOC;LAMB1;LAMC2;LGALS3;MAZ…	5.11472	5.08e-53
GOBP_EPITHELIAL_CELL_DIFFERENTIATION	CDH2;CD24;SPRY1;CCNO;KLF2;BASP1;CEBPB;AGR2;DNPH1;TXNIP;PDPN;SPINT2;KDM5B;TRIOBP;PLAAT3;FSTL1;CCDC78;CNN3;COL4A1;OSR1;COL15A1;CLDN3;CSTA;CTNNB1;CTSB;DAB2;ARX;DLX5;JAG1;DSP;EDNRA;EDNRB;RILPL2;EPHA2;ELF3;TUBB;EREG;ESR1;FOXJ1;PALLD;FLG;KDM6B;FLNB;PLCB1;KAZN;FOSL2;MAFF;NR5A1;SPDEF;CLIC4;GATA2;GATA4;GATA6;EHF;B4GALT1;B9D1;INTU;SFN;RAPGEF1;GSTM3;ANXA1;ANXA4;HIF1A;ANXA7;HNRNPH3;HOXB5;HES1;ICAM1;ID1;ID2;I…	4.61	1.58e-52
GOBP_CELLULAR_RESPIRATION	PPIF;ATP5PD;ATP5MG;UQCR11;PARK7;NDUFA11;MDH1B;COX4I1;COX5B;COX6A1;COX6B1;COX6C;COX7A2;COX7B;COX7C;COX8A;ETFB;NIPSNAP2;BLOC1S1;NUPR1;UQCRQ;PRELID1;GPD1;DNAJC15;UQCR10;NOP53;HIF1A;IDH2;NDUFS7;RHOA;CHCHD10;ARL2;MDH1;MDH2;MT-ATP6;MT-ATP8;MT-CO1;MT-CO2;MT-CO3;MT-CYB;MT-ND1;MT-ND2;MT-ND3;MT-ND4;MT-ND4L;MT-ND5;MT-ND6;NDUFA1;NDUFA2;NDUFA3;NDUFA4;NDUFA5;NDUFA7;NDUFA8;NDUFAB1;NDUFB1;NDUFB2;NDUFB3;NDUFB4;ND…	9.80132	5.33e-52
GOBP_ENERGY_DERIVATION_BY_OXIDATION_OF_ORGANIC_COMPOUNDS	PPIF;ATP5PD;SORBS1;ATP5MG;PTGES3;UQCR11;CAVIN3;PARK7;NDUFA11;MDH1B;COX4I1;COX5B;COX6A1;COX6B1;COX6C;COX7A2;COX7B;COX7C;COX8A;ADRB3;ETFB;GABARAPL1;NIPSNAP2;BLOC1S1;NUPR1;UQCRQ;PRELID1;GPD1;DNAJC15;UQCR10;NOP53;HIF1A;IDH2;IGF1;IL6ST;INSR;NDUFS7;RHOA;LEP;LEPR;CHCHD10;ARL2;MDH1;MDH2;MT-ATP6;MT-ATP8;MT-CO1;MT-CO2;MT-CO3;MT-CYB;MT-ND1;MT-ND2;MT-ND3;MT-ND4;MT-ND4L;MT-ND5;MT-ND6;MYC;NDUFA1;NDUFA2;NDUFA3;…	7.51292	7.38e-52
GOBP_POSITIVE_REGULATION_OF_CATALYTIC_ACTIVITY	TANK;CD24;PDCD6;COX17;RASGRP2;CDKN1A;STUB1;NET1;RACK1;CIB1;ARL6IP5;CXCL13;PTGES3;ERP29;FERMT2;CHI3L1;AKAP13;PARK7;PHB2;NLRP3;CKS2;ADCYAP1R1;CLU;PIFO;CLDN4;CLDN3;CSF1R;CCN2;CTNNB1;ADRA2A;CTSD;CTSH;ADRA2C;NEK10;RASGEF1B;CYBA;ADRB3;DAPK1;DAXX;DBI;DDX3X;AGTR2;EDN1;EDNRA;EFNA1;EGR1;EPHA2;C9orf72;EPHB6;ERBB3;EREG;ERN1;ESR1;F3;ACSL1;PTK2B;FBLN1;STOX1;MAPK15;FGR;MAPRE3;DKK1;FOXJ1;FN1;PPP1R15A;MTCH1;XRCC6…	3.53534	1.11e-51
GOBP_REGULATION_OF_IMMUNE_RESPONSE	CD24;IGHV1-69D;LILRB2;TNIP1;CXCL13;HEXIM1;MASP2;HCST;FGL2;IRAK3;PARK7;PHB2;NLRP3;CLU;SLC15A4;COL3A1;CTSH;CTSS;CYBA;BTNL9;CD55;DDX3X;CFD;ECM1;AHR;ELF1;A2M;EREG;ESR1;FCER1A;FCER1G;FCGR2A;FCGR3B;FCN1;FGR;FKBP1A;ZBTB1;FOXJ1;FPR1;LY96;CADM1;FYB1;XRCC6;SAMHD1;GATA2;CLEC4E;GATA6;GBP1;IGHV6-1;IGHV5-51;IGHV4-61;IGHV4-59;IGHV4-39;IGHV4-34;GPR17;IGHV4-4;IGHV3-74;IGHV3-53;IGHV3-49;IGHV3-48;IGHV3-33;IGHV3-30;…	4.01683	1.14e-51
GOBP_ESTABLISHMENT_OF_PROTEIN_LOCALIZATION	CD24;PDCD6IP;PDCD6;TOMM6;AP1M2;ARL4C;CDKN1A;RAMP1;RACK1;LYPLA1;CIB1;ARL6IP5;TXNIP;MTX2;CETN2;GIPC1;AHCYL1;VAMP5;RUVBL2;YIF1A;EHD1;KDELR1;SEC61B;TMED2;LMAN2;ERP29;YWHAQ;KDELR2;IFT27;RAB31;KIF3A;CHGA;PKIG;RABL2A;PARK7;COPE;SCAMP4;PHB2;GABARAP;GABARAPL2;RAB3IP;AP2M1;CLU;CLTA;CLTB;SLC15A4;SLC51B;PLK3;COL1A1;COMP;ROMO1;ADRA2A;CTSD;DAB2;LCA5;EDNRA;EDNRB;RILPL2;SPAG17;CTTN;STX2;ACSL3;ACSL4;LRWD1;COPZ1;S…	3.05194	2.36e-51
GOBP_POSITIVE_REGULATION_OF_RNA_METABOLIC_PROCESS	TSTD1;ACTR2;NAMPT;TOB1;CDKN1C;ZNF267;TNIP1;KLF2;CITED2;CEBPB;CEBPD;DDX17;RUVBL2;SUB1;MORF4L1;ADIRF;KCNQ1OT1;PARK7;BUD23;NLRP3;CIRBP;OSR2;CLNS1A;METTL23;COL1A1;OSR1;KLF6;NCOA7;CREB3L4;CTNNB1;DAB2;DAXX;DCN;CITED4;DDX3X;DDX5;GLIS3;SSBP4;DLX5;JAG1;AGTR2;EDN1;EGR1;AHR;EGR3;EIF5A;ELF1;ELF3;ENG;ERN1;ESR1;ETS2;MECOM;STOX1;FGF7;TFEC;MAPRE3;ELL2;FOXJ1;FOXO1;FOXO3;TNRC6B;KDM6B;PLCB1;WWC1;TUT4;RYBP;SF3B1;FOS…	2.93502	2.91e-51
GOBP_EMBRYO_DEVELOPMENT	PDCD6;DNAJB6;KLF2;CITED2;RACK1;BASP1;EMG1;N4BP2L2;CEBPB;SEMA3C;SLC34A2;SPINT2;CFL1;RUVBL2;TMED2;TRIOBP;CTHRC1;OSR2;DNAAF1;METTL23;COL1A1;COL3A1;PIFO;COL4A2;COL5A1;COL5A2;COL6A1;COL8A1;COL11A1;COL12A1;OSR1;ADM;CRABP2;CCDC24;CTNNB1;DAD1;DLX5;JAG1;DSC3;DUSP1;DUSP2;EDN1;EDNRA;EFNA1;EPHA2;DZIP1L;ELF3;A2M;SMIM14;ENDOG;ENG;HIPK1;ETS2;EYA2;ACSL4;STOX1;ALDH1A3;FBN1;EFEMP1;PPP1R35;DKK1;CLUAP1;KDM6B;SULF1;P…	3.59933	5.09e-51
GOBP_POSITIVE_REGULATION_OF_CELL_DEATH	CDKN1A;NET1;SAP18;RACK1;ARL6IP5;TXNIP;CTSC;GADD45G;PARK7;OMA1;CLU;ADM;CCN2;CTNNA1;CTNNB1;CTSD;CTSH;CYP1B1;DAPK1;DAXX;GADD45A;DDX3X;TLE5;NQO1;DUSP6;AGTR2;EGR1;EIF5A;ENDOG;ALDH1A3;PHLDA1;DKK1;FOXO1;FOXO3;RYBP;FOS;MTCH1;SPDEF;TNFAIP8;GATA6;FAM162A;NUPR1;B4GALT1;PRELID1;PDCD4;H19;GRN;RGCC;PYCARD;PDIA3;GSN;ANXA1;HBA1;HBA2;HBB;HMGB1;NR4A1;HP;DNAJA1;HSPD1;ID3;IGFBP3;CCN1;IL10;IDO1;ITGA6;ITGAM;ITGB1;ITGB…	4.90393	3.54e-50
GOBP_LYMPHOCYTE_ACTIVATION	CD24;CDKN1A;IGHV1-69D;LILRB2;GPNMB;CEBPB;HSPH1;FGL2;KDELR1;CORO1A;PHB2;NLRP3;JAML;SLC15A4;KLF6;MAP3K8;CTNNB1;CTSL;CXADR;CD55;DPP4;GPR183;EGR1;AHR;EGR3;AIF1;GAPT;PTK2B;FCER1G;FGR;FKBP1A;ZBTB1;FOXJ1;FOXO3;CADM1;XRCC6;TMEM98;GAS6;CLEC4E;ABL2;PRELID1;IGHV6-1;IGHV5-51;IGHV4-61;IGHV4-59;IGHV4-39;IGHV4-34;IGHV4-4;IGHV3-74;IGHV3-53;IGHV3-49;IGHV3-48;IGHV3-33;IGHV3-30;IGHV3-23;IGHV3-21;IGHV3-20;IGHV3-15;I…	4.13395	3.58e-50
GOBP_TISSUE_MORPHOGENESIS	SPRY1;CITED2;SEMA3C;PDPN;SPINT2;KDM5B;TMED2;FERMT2;PHB2;CTHRC1;LRG1;DNAAF1;COL3A1;COL4A1;COL5A1;COL11A1;OSR1;ADM;CSF1R;CSNK2B;CTNNB1;CTSH;CTSZ;DAB2;JAG1;DSP;AGTR2;EDN1;EDNRA;EPHA2;ENG;ESR1;EYA2;STOX1;ALDH1A3;FGF7;FKBP1A;DKK1;CLUAP1;KDM6B;FLNA;SULF1;COBL;RPGRIP1L;FOLR1;PLXNB2;SPEF1;CLIC4;TRAF3IP1;IFT172;GATA4;GCNT1;GJA1;INTU;GPC3;CRB2;GRB2;EFEMP2;HIF1A;HOXB7;HES1;CCDC39;ID4;IGFBP5;CCN1;RBPJ;IHH;IL…	4.79492	5.36e-50
GOBP_NEGATIVE_REGULATION_OF_MULTICELLULAR_ORGANISMAL_PROCESS	CD24;TRIB1;SPRY1;KLF2;CITED2;GPNMB;SEMA6B;SEMA3C;PROCR;PRDX4;CXCL13;CTSC;FGL2;ADAMTS5;IRAK3;PHB2;NLRP3;CARD16;VASN;COL4A2;OSR1;ADM;CSNK2B;CST3;CTNNA1;CTNNB1;ADRA2A;CTSK;CXADR;CYBA;ADRB3;DCN;GADD45A;AGTR2;ECM1;EDN1;EFNA1;EPHA2;SERPINB1;ALDH1A1;PTK2B;FBN1;EFEMP1;PI16;DKK1;FOXJ1;FOXO1;STAB1;SULF1;WWC1;FN1;CD2AP;ALOX12;NR5A1;TMEM98;TRAF3IP1;GAS6;GATA2;GATA6;GBP1;GJA1;GJA5;PDCD4;GNAI2;TMEM176B;GRN;RGC…	3.49703	1.26e-49
GOBP_MICROTUBULE_BASED_MOVEMENT	ACTR2;DNAL4;IFT27;KIF3A;IFT43;KIF12;CFAP70;DNAAF1;CFAP54;CFAP52;LCA5L;TEKT4;NEK10;CFAP206;DNAAF4;TTLL9;DEFB1;LCA5;DNAH5;DNAH6;DNAH9;DYNC1I2;DNAH10;SPAG17;CFAP221;DNAH12;ENKUR;CFAP53;RSPH9;CLUAP1;SYNE2;SUN1;CFAP65;CATSPERD;CFAP45;SPEF1;DPCD;TRAF3IP1;IFT172;GAS8;BLOC1S1;DNAI1;INTU;TEKT2;TSSK4;CFAP157;CFAP47;IFT81;HIF1A;HNRNPU;HSBP1;DNAJA1;HSPA8;HSPB1;CCDC39;RSPH4A;CFAP100;KIF2A;KIF5B;KIF22;CFAP73;K…	6.15155	2.61e-49
GOBP_REPRODUCTION	DNAJB6;ACTR2;CITED2;WFDC2;BASP1;CLGN;CEBPB;CIB1;PRDX4;SMC2;SPINT2;CETN2;KDM5B;TUBGCP2;ADAM28;MAGED2;PRDX3;TMED2;CCNI;IFT27;PARK7;PHB2;CKS2;ADCYAP1R1;ANAPC16;OSR1;COL16A1;ADM;PACRG;CLDN4;CREM;CRIP1;CFAP54;CFAP52;CREB3L4;CTNNA1;CTNNB1;ADRA2A;CTSB;TCF23;CXADR;CFAP206;CYP1B1;MCMDC2;TTLL9;DDX3X;DEFB1;DNAH5;JAG1;DUSP1;EDN1;EDNRA;EDNRB;EGR1;A2M;SPAG17;CFAP221;CENPX;STX2;EREG;ESR1;ACSL4;PTK2B;FBLN1;ENKUR…	3.12317	3.58e-49
GOBP_GENERATION_OF_NEURONS	CDH2;CDH11;ACTR2;TUBB3;SEMA6B;CEBPB;SEMA3C;CIB1;PDLIM5;CFL1;SDCCAG8;TUBGCP2;EHD1;IFT27;TRIOBP;C12orf57;CTHRC1;COL3A1;ADM;EMB;MTPN;CRABP2;CSF1R;CTNNA1;CTNNB1;ADRA2C;CUX1;DAB2;DNAAF4;ARX;DLX5;DPYSL2;DPYSL3;JAG1;EDN1;EDNRA;EDNRB;EFNA1;EPHA2;EIF4E;CTTN;EMX2;C9orf72;HIPK1;EPHB6;ALCAM;ACSL3;ACSL4;PTK2B;PHACTR1;DKK1;PALLD;FOXO3;EPB41L3;FLNA;ARC;COBL;DENND5A;RPGRIP1L;FN1;FOLR1;MACF1;PLXNB2;MTCH1;NEGR1;IF…	3.15785	6.13e-49
GOBP_REGULATION_OF_PEPTIDASE_ACTIVITY	TANK;PDCD6;DNAJB6;RACK1;WFDC2;LAMTOR5;ARL6IP5;SPINT2;PRDX3;PARK7;NLRP3;CARD16;COL6A3;CLDN4;CLDN3;CRYAB;CST3;CST6;CSTA;CSTB;CCN2;CTSB;CTSD;CTSH;DAPK1;DDX3X;ECM1;EFNA1;SERPINB1;A2M;F3;FBLN1;PI16;ARL6IP1;FN1;MTCH1;TNFAIP8;PRDX5;GAPDH;GAS6;FAM162A;BEX3;PRELID1;GPC3;SFN;CRB2;GRN;PYCARD;GSN;ANXA2;HMGB1;NR4A1;BIRC3;HSPD1;HSPE1;APLP2;IFI16;CCN1;RHOA;LRP1;LTF;ARRB2;MBP;MAP3K5;MGMT;MYC;PEBP1;SERPINE1;SERPI…	5.74015	9.78e-49
GOBP_POSITIVE_REGULATION_OF_CELL_POPULATION_PROLIFERATION	CD24;PDCD6;COX17;NAMPT;CDKN1A;LILRB2;N4BP2L2;CIB1;KDM5B;PRDX3;FERMT2;CORO1A;CTHRC1;OSR2;LRG1;JAML;OSR1;COMP;ADM;CLDN7;CRIP2;ROMO1;CSF1R;CSF2RA;CCN2;CTNNB1;ADRA2A;COPS9;CTSH;CYBA;CD55;DLX5;DPP4;GPR183;ECM1;EDN1;EDNRB;EGR1;EGR3;AIF1;HIPK1;ERBB3;EREG;ERN1;ESR1;F3;PTK2B;FGF7;MAPK15;FN1;PRAME;FOSL2;SYF2;GAS6;GATA2;GATA6;B4GALT1;GJA1;GLUL;GNAI2;GNG5;ANG;NEAT1;GRN;PYCARD;SLC25A5;SERTAD1;ANXA1;HCK;HCLS1;…	3.75367	9.85e-49
GOBP_POSITIVE_REGULATION_OF_CELLULAR_COMPONENT_ORGANIZATION	PDCD6IP;ACTR2;PPIF;ARPC2;AKAP9;WASF2;STUB1;RACK1;CXCL13;SMC2;CDC42EP3;PDPN;RUVBL2;EHD1;FERMT2;RAB31;DSTN;PARK7;SYNPO;AP2M1;CLU;COL16A1;CLDN3;CRABP2;CCN2;CTNNB1;CUX1;DAB2;DCN;DDX3X;DPYSL3;EDN1;EPHA2;EIF5A;CTTN;ENDOG;EPS8;EREG;ESR1;PTK2B;PPP1R35;MAPK15;FLNA;PLCB1;COBL;FN1;MACF1;PPP1R15A;PLXNB2;NEGR1;GATA2;FAM162A;ABL2;GPC3;GOLGA4;GRB2;RAPGEF1;GRN;RGCC;SLC25A4;PYCARD;SLC25A5;GSN;EFEMP2;ANXA1;ANXA2;H…	3.62838	1.87e-48
GOBP_INFLAMMATORY_RESPONSE	TNIP1;CEBPB;CXCL13;CTSC;HNRNPA0;CHI3L1;PARK7;MGLL;NLRP3;CLU;ADM;CSF1R;C2CD4A;ADRA2A;CYBA;CYBB;DDT;AGTR2;ECM1;AHCY;EDNRB;EPHA2;AIF1;ELF3;A2M;ESR1;F3;FGR;KDM6B;STAB1;FN1;FOS;FPR1;LY96;ALOX5AP;PRDX5;NUPR1;B4GALT1;PDCD4;H19;NEAT1;GPR17;GPS2;GPX4;GRN;PYCARD;CXCL1;CXCL2;CXCL3;GSTP1;ANXA1;HCK;HIF1A;HLA-DRB1;AOAH;HLA-E;HMGB1;HMGB2;HP;BIRC3;IFI16;IFNGR1;APOD;IGF1;APOE;IGFBP4;IGHG1;RBPJ;IL1A;IL1B;IL1R1;IL1…	4.01282	4.04e-48
GOBP_BLOOD_VESSEL_MORPHOGENESIS	CDH2;PDCD6;WASF2;RAMP1;KLF2;CITED2;GPNMB;CIB1;CXCL13;CHI3L1;LRG1;HSPB6;COL3A1;COL4A1;COL4A2;COL8A1;COL15A1;COMP;ADM;CCN2;CTNNB1;CTSH;CYBB;CYP1B1;DCN;GADD45A;JAG1;ECM1;EDN1;EDNRA;EFNA1;EGR3;EPHA2;ENG;HIPK1;EREG;F3;PTK2B;FLNA;STAB1;SULF1;FN1;FOLR1;TSPAN12;DDAH1;CLIC4;TIPARP;GATA2;GATA4;GATA6;B4GALT1;GJA5;GLUL;ANG;GRN;RGCC;GTF2I;EFEMP2;ANXA1;ANXA2;ANXA3;HIF1A;NR4A1;HES1;HSPB1;ID1;APOD;APOE;CCN1;RBPJ…	4.40827	1.18e-47
GOBP_IMMUNE_EFFECTOR_PROCESS	IGHV1-69D;TUBB4B;SPON2;MASP2;CTSC;FGL2;CHGA;CORO1A;IRAK3;PHB2;NLRP3;CLU;SLC15A4;CTSH;CD55;CFD;JAG1;GPR183;AHR;A2M;GAPT;TUBB;PTK2B;FCER1G;FCN1;FGR;ZBTB1;FOXJ1;CADM1;TMEM98;GATA2;CLEC4E;IGHV6-1;IGHV5-51;IGHV4-61;IGHV4-59;IGHV4-39;IGHV4-34;IGHV4-4;IGHV3-74;IGHV3-53;IGHV3-49;IGHV3-48;IGHV3-33;IGHV3-30;IGHV3-23;IGHV3-21;IGHV3-20;IGHV3-15;IGHV3-13;IGHV3-11;IGHV3-7;IGHV2-5;IGHV1-18;IGHV1-3;GRN;RGCC;PYCA…	4.40455	4.28e-47
GOBP_MORPHOGENESIS_OF_AN_EPITHELIUM	SPRY1;CITED2;SEMA3C;PDPN;SPINT2;KDM5B;TMED2;FERMT2;PHB2;CTHRC1;LRG1;DNAAF1;COL4A1;COL5A1;OSR1;ADM;CSF1R;CSNK2B;CTNNB1;CTSH;CTSZ;DAB2;JAG1;AGTR2;EDN1;EDNRA;EPHA2;ENG;ESR1;STOX1;ALDH1A3;FGF7;DKK1;CLUAP1;FLNA;SULF1;COBL;RPGRIP1L;FOLR1;PLXNB2;SPEF1;CLIC4;TRAF3IP1;IFT172;GATA4;GJA1;INTU;GPC3;GRB2;HIF1A;HOXB7;HES1;CCDC39;ID4;IGFBP5;CCN1;RBPJ;IHH;IL10;ILK;AR;ITGA5;ITGAX;ITGB1;AREG;KRT10;RHOA;KRT17;RHOB;…	5.16867	4.34e-47
GOBP_GROWTH	RASGRP2;SPRY1;CDKN1A;NET1;KLF2;CITED2;RACK1;CPQ;BASP1;SEMA6B;SEMA3C;FBLN5;CIB1;AGR2;DNPH1;PDLIM5;KDM5B;TMED2;CCDC85B;AKAP13;COL3A1;COMP;DCBLD2;ADM;MTPN;CRABP2;SELENOM;CRYAB;CTNNB1;CXADR;CYBA;ADRB3;DAB2;DDX3X;TLE5;ARX;DPYSL2;DUSP6;AGTR2;ECM1;EDN1;EDNRA;EIF4G2;CTTN;ENO1;C9orf72;EREG;ESR1;ALCAM;PTK2B;PI16;FGF7;FOXO3;EPB41L3;PLCB1;COBL;WWC1;FN1;MACF1;CLIC4;GAS1;GATA4;GATA6;GJA1;GPC3;SERP1;GNAS;GOLGA4…	3.80064	4.83e-47
GOBP_PHOSPHORYLATION	CD24;HIPK3;AKAP9;TRIB1;SPRY1;CDKN1A;CDKN1C;CCNO;RACK1;GPNMB;CIB1;PRDX4;HEXIM1;PTGES3;MAP3K2;HCST;PRDX3;TMED2;ERP29;FERMT2;CCNI;PKIG;CHI3L1;SLC2A6;IRAK3;AKAP13;PARK7;PHB2;CKB;CKS2;CLU;CLK1;AK7;PLK3;PIFO;MAP3K8;CLDN3;CSF1R;CSF2RA;CSNK2B;CCN2;ADRA2A;ADRA2C;NEK10;CNKSR3;DAB2;DGKH;DAPK1;DAXX;GADD45A;DDX3X;SGMS2;DUSP1;DUSP6;EDN1;EDNRA;EDNRB;EEF1A1;EFNA1;EGR1;EPHA2;AIF1;ENG;ENO1;C9orf72;HIPK1;EPHB6;ERBB…	2.80358	8.13e-47
GOBP_NEGATIVE_REGULATION_OF_BIOSYNTHETIC_PROCESS	DNAJB6;TOB1;AASS;CDKN1A;CDKN1C;SAP18;KLF2;CITED2;RACK1;BASP1;C1D;N4BP2L2;FAM3C;CEBPB;CEBPD;HEXIM1;TXNIP;IGF2BP2;KDM5B;RUVBL2;MAGED2;YWHAQ;CCDC85B;PKIG;PARK7;PHB2;CIRBP;OSR2;TWIST2;CDYL2;PLK3;OSR1;CREM;CRYAB;CTNNB1;TCF23;CUX1;DAB2;DAPK1;DAXX;DBI;GADD45A;AEBP1;DDX3X;DDX5;TLE5;GLIS3;ARX;EDN1;EDNRB;EFNA1;EGR1;AHR;EIF4A2;EIF4E;ELF3;ENO1;EREG;ESR1;ETS2;ETV3;MECOM;JAZF1;TFEC;ZBTB1;DKK1;FOXJ1;FOXO1;FOXO3…	2.89036	1.66e-46
GOBP_NEGATIVE_REGULATION_OF_CELL_POPULATION_PROLIFERATION	TOB1;TRIB1;SPRY1;CDKN1A;CDKN1C;LILRB2;CITED2;IFI30;GPNMB;CEBPB;CIB1;PRDX4;PDPN;SPINT2;BTG3;PHB2;CNN1;PODN;ADM;CLDN3;CSF1R;CSNK2B;CTNNA1;CTNNB1;CXADR;CYP1B1;DAB2;DPT;DUSP1;AIF1;EREG;ETV3;FABP6;PTK2B;FBLN1;FOXJ1;PDS5B;SULF1;DDAH1;FTH1;KANK2;TES;IFT172;GAS8;GATA2;GATA6;NUPR1;B4GALT1;INTU;GPC3;PDCD4;SFN;ANG;RGCC;CXCL1;GSTP1;EFEMP2;TAX1BP3;HLA-DRB1;HMGA1;HES1;HSPA1A;HSPA1B;APOD;APOE;IGFBP3;IGFBP5;IGFB…	4.06553	3.38e-46
GOBP_REGULATION_OF_APOPTOTIC_SIGNALING_PATHWAY	PPIF;RACK1;IVNS1ABP;CTSC;ERP29;PARK7;PTPMT1;CLU;CTNNA1;CTNNB1;CTSH;DDX3X;AGTR2;EIF5A;CTTN;ENO1;EYA2;GATA4;NUPR1;PRELID1;GCLC;GCLM;GNAI2;SLC25A4;PYCARD;SLC25A5;PDIA3;SLC25A6;GSTP1;HIF1A;HMGB2;HNRNPK;DNAJA1;HSPA1A;HSPA1B;HSPB1;ICAM1;IGF1;IL1A;IL1B;ITGA6;AR;LGALS3;LMNA;ARRB2;MAZ;MCL1;MDM2;MIF;MSX1;MUC1;MYC;ATF3;NFE2L2;NR4A2;P4HB;RRM2B;G0S2;SERPINE1;FIS1;NDUFA13;TNFRSF12A;PLAUR;PMAIP1;IL20RA;WNT4;PPI…	6.26892	1.18e-45
GOBP_REGULATION_OF_LYMPHOCYTE_ACTIVATION	CD24;CDKN1A;IGHV1-69D;LILRB2;GPNMB;CEBPB;HSPH1;FGL2;CORO1A;NLRP3;SLC15A4;MAP3K8;CTNNB1;CD55;DPP4;GPR183;AHR;EGR3;AIF1;FGR;ZBTB1;FOXJ1;FOXO3;XRCC6;GAS6;ABL2;PRELID1;IGHV6-1;IGHV5-51;IGHV4-61;IGHV4-59;IGHV4-39;IGHV4-34;IGHV4-4;IGHV3-74;IGHV3-53;IGHV3-49;IGHV3-48;IGHV3-33;IGHV3-30;IGHV3-23;IGHV3-21;IGHV3-20;IGHV3-15;IGHV3-13;IGHV3-11;IGHV3-7;IGHV2-5;IGHV1-18;IGHV1-3;PYCARD;ANXA1;HLA-A;HLA-DMA;HLA-DM…	4.84103	1.49e-45
GOBP_CARBOHYDRATE_DERIVATIVE_METABOLIC_PROCESS	OST4;AASS;RAMP1;TNIP1;AKR1A1;ST3GAL6;ATP5PD;DNPH1;ATP5MG;OGA;CHI3L1;CHIT1;SLC2A6;PARK7;SLC51B;NDUFA11;COL11A1;CST3;CTNNB1;CTSL;DAD1;DCN;SLC26A2;EDNRA;AHCY;EDNRB;EPHA2;KRTCAP2;ENO1;ERH;ALDH1A1;ACSL1;ACSL3;ACSL4;AK9;PHLDA1;ENPP4;SULF1;PLCB1;FUCA1;NUDT14;PGLS;BACE2;MPC2;GALNT3;SAMHD1;GAPDH;ZBTB20;NUPR1;GCNT1;B4GALT1;GK;GLA;SERP1;GPD1;H19;GUCY1A2;GUK1;NME7;DSE;HAS1;NT5C;HIF1A;HINT1;AOAH;HMGCR;HMGCS1;…	3.42387	1.75e-45
GOBP_POSITIVE_REGULATION_OF_CELL_ADHESION	CD24;ARPC2;LILRB2;CITED2;CIB1;AGR2;CXCL13;PDPN;HSPH1;FERMT2;TRIOBP;CORO1A;NLRP3;COL8A1;COL16A1;MAP3K8;CCDC80;DAB2;CD55;DPP4;EGR3;AIF1;PTK2B;FBLN2;ZBTB1;FOXO3;FLNA;FN1;ABI3BP;GCNT1;ABL2;ANK3;PYCARD;EFEMP2;ANXA1;HLA-A;HLA-DMA;HLA-DMB;HLA-DPA1;HLA-DPB1;HLA-DQA1;HLA-DQA2;HLA-DQB1;HLA-DRA;HLA-DRB1;HLA-DRB5;HLA-E;HMGB1;HES1;HSPD1;IGF1;IGFBP2;CCN1;IHH;IL1A;IL1B;IL6ST;IL7R;IL10;IL18;ILK;IRAK1;ITGA3;ITGA5…	5.28389	3.62e-45
GOBP_NUCLEOSIDE_TRIPHOSPHATE_METABOLIC_PROCESS	ATP5PD;ATP5MG;SLC2A6;AK7;NDUFA11;ENO1;AK9;SAMHD1;GAPDH;ZBTB20;NUPR1;GPD1;H19;NME7;HIF1A;HSPA1A;HSPA1B;HSPA8;IGF1;INSR;ITPA;NDUFS7;RHOA;LDHA;ARL2;MT-ATP6;MT-ATP8;MT-CO2;MT-ND1;MT-ND2;MT-ND3;MT-ND4;MT-ND4L;MT-ND5;MT-ND6;NDUFA1;NDUFA2;NDUFA3;NDUFA5;NDUFA7;NDUFA8;NDUFAB1;NDUFB1;NDUFB2;NDUFB3;NDUFB4;NDUFB5;NDUFB6;NDUFB7;NDUFB8;NDUFB9;NDUFC1;NDUFC2;NDUFS5;NDUFS6;NDUFV2;ATP1B1;NME1;NME2;NME3;NT5E;ATP5F1…	7.92778	4.93e-45
GOBP_INNATE_IMMUNE_RESPONSE	TANK;ACTR2;IGHV1-69D;CRISP3;TUBB4B;WFDC2;IFITM3;SPON2;CLEC10A;IFITM2;HEXIM1;MASP2;CHGA;CORO1A;IRAK3;PHB2;NLRP3;CLU;SLC15A4;CSF1R;CYBA;CYBB;CD55;DAPK1;DDX3X;DEFB1;CFD;EDN1;AIF1;A2M;TUBB;EREG;PTK2B;FAU;MPEG1;FCER1G;FCN1;FGR;ZBTB1;FLNB;RPL13A;LY96;CADM1;XRCC6;SERINC5;SAMHD1;GAPDH;CLEC4E;GBP1;GBP2;GBP3;GCH1;PPP1R14B;ANG;IGHV6-1;IGHV5-51;IGHV4-61;IGHV4-59;IGHV4-39;IGHV4-34;IGHV4-4;IGHV3-74;IGHV3-53;IG…	3.70954	6.91e-45
GOBP_REGULATION_OF_RESPONSE_TO_EXTERNAL_STIMULUS	TRIB1;TNIP1;SEMA6B;CEBPB;SEMA3C;CXCL13;HEXIM1;CTSC;FGL2;IRAK3;PARK7;MGLL;NLRP3;CARD16;SLC15A4;CLDN3;CSF1R;C2CD4A;CYBA;CD55;DDT;DPP4;DUSP1;GPR183;EDN1;EDNRB;AIF1;A2M;EREG;ESR1;F3;PTK2B;FCN1;FGR;ENPP4;FLNA;LY96;CADM1;ALOX12;ALOX5AP;XRCC6;SAMHD1;KANK2;TRAF3IP1;GAS6;GATA6;NUPR1;PDCD4;NEAT1;GPR17;GPS2;GPX4;GRN;PYCARD;GSTP1;NOP53;ANXA1;ANXA2;HCK;CFH;HLA-A;HLA-B;HLA-DRB1;AOAH;HLA-E;HMGB1;HMGB2;BIRC3;HSP…	3.53819	8.29e-45
GOBP_PROTON_MOTIVE_FORCE_DRIVEN_ATP_SYNTHESIS	ATP5PD;ATP5MG;NDUFA11;NDUFS7;MT-ATP6;MT-ATP8;MT-ND1;MT-ND2;MT-ND3;MT-ND4;MT-ND4L;MT-ND5;MT-ND6;NDUFA1;NDUFA2;NDUFA3;NDUFA5;NDUFA7;NDUFA8;NDUFAB1;NDUFB1;NDUFB2;NDUFB3;NDUFB4;NDUFB5;NDUFB6;NDUFB7;NDUFB8;NDUFB9;NDUFC1;NDUFC2;NDUFS5;NDUFS6;NDUFV2;ATP5F1A;ATP5F1B;ATP5F1C;NDUFA13;ATP5F1D;ATP5F1E;ATP5PB;ATP5MC1;ATP5MC2;ATP5MC3;ATP5ME;ATP5PF;ATP6V1A;ATP6V0C;ATP5PO;NDUFB11;NDUFA12;SDHA;SDHC;ATP5MF	32.4198	1.26e-44
GOBP_RESPONSE_TO_GROWTH_FACTOR	PDCD6;TOB1;SPRY1;STUB1;CDKN1C;CITED2;RACK1;CIB1;CXCL13;SPINT2;GIPC1;KDM5B;EHD1;FERMT2;CORO1A;FSTL1;VASN;LRG1;COL1A1;COL1A2;COL3A1;COL4A2;COMP;CCN2;CTNNB1;CTSK;DAB2;DCN;DDX5;DLX5;DUSP6;AGTR2;EDN1;EEF1A1;EGR1;EGR3;EPHA2;ENG;ERN1;FBN1;FGF7;FKBP1A;DKK1;FOXO3;SULF1;FOLR1;FOS;TSPAN12;FAM89B;MXRA5;GALNT3;GAS1;GAS6;GATA4;GATA6;GPC3;PDCD4;GCLC;GCLM;CRB2;GRB2;RAPGEF1;ANXA1;HAS1;ANXA3;HIF1A;NR4A1;HES1;HSPA1…	4.10557	1.61e-44
GOBP_POSITIVE_REGULATION_OF_TRANSPORT	CDH2;PDCD6IP;COX17;AKAP9;ABCA8;RACK1;CEBPB;CIB1;SORBS1;AHCYL1;EHD1;LMAN2;RAB31;PARK7;ADCYAP1R1;AP2M1;CLU;SLC51B;PLK3;ADRA2A;CTSS;CYBA;CNKSR3;DAB2;DBI;EDN1;EDNRA;EDNRB;ACSL1;ACSL3;ACSL4;LRRC55;FCER1G;FCN1;FGR;FLNA;ARL6IP1;ARC;CD2AP;MPC2;GAS6;GATA2;NIPSNAP2;PRELID1;GPC3;SERP1;CHMP2A;GLUL;GNAI2;SFN;ANG;GPS2;ANK3;RGCC;PYCARD;ANXA1;ANXA2;HCLS1;HIF1A;HLA-DRB1;HNRNPK;HSP90AA1;HSP90AB1;IGF1;APOE;IL1A;IL1…	3.72786	1.66e-44
GOBP_REGULATION_OF_ORGANELLE_ORGANIZATION	CDH2;PDCD6IP;ARPC5;ARPC3;ARPC1B;PPIF;ARPC2;AKAP9;WASF2;CDK2AP2;LILRB2;CIB1;SMC2;CDC42EP3;IQGAP2;SDCCAG8;RUVBL2;FERMT2;DSTN;CNTRL;TRIOBP;CORO1A;AKAP13;PARK7;SYNPO;OMA1;CLU;ADD3;PLEKHH2;MTPN;CSF1R;CCN2;CTNNB1;DCN;DUSP1;EDN1;ELN;CTTN;ENDOG;C9orf72;EPS8;EREG;PTK2B;STOX1;PPP1R35;MAPK15;MAPRE3;FLNA;ARL6IP1;SYNE2;PLCB1;COTL1;CD2AP;CDC26;SPEF1;CLIC4;TRAF3IP1;FAM162A;NUPR1;ABL2;INTU;PRELID1;CHMP2A;GCLC;GR…	3.25957	1.94e-44
GOBP_NEGATIVE_REGULATION_OF_CATALYTIC_ACTIVITY	DNAJB6;MRLN;HIPK3;AKAP9;TRIB1;SPRY1;CDKN1A;CDKN1C;RACK1;WFDC2;CIB1;LAMTOR5;HEXIM1;TXNIP;SPINT2;IQGAP2;PRDX3;TMED2;PKIG;IRAK3;PARK7;CARD16;COL6A3;CRYAB;PPP1R36;CST3;CST6;CSTA;CSTB;CTSB;GADD45A;DDX3X;NQO1;DUSP1;ECM1;EDNRB;EIF4A2;SERPINB1;A2M;PI16;PHACTR1;PPP1R35;FKBP1A;ARL6IP1;HSPBP1;PPP1R15A;TNFAIP8;PRDX5;GAPDH;GAS6;GCHFR;PPP1R14B;CHORDC1;GLA;GPC3;PDCD4;GNAI2;SFN;H19;PPP1R42;CRB2;GPS2;PHPT1;PYCARD…	3.95494	3.88e-44
GOBP_CELLULAR_RESPONSE_TO_LIPID	TRIB1;LILRB2;TNIP1;SPON2;CEBPB;DDX17;CXCL13;PTGES3;RUVBL2;PARK7;PHB2;NLRP3;CARD16;FBXO32;COL1A1;OSR1;SRARP;CYP1B1;DAB2;CD55;DNAAF4;DAXX;DDX5;EDN1;EDNRB;AHR;EIF4E;ESR1;PTK2B;FOXO3;PLCB1;FOS;LY96;KANK2;ABL2;GJB2;PDCD4;PYCARD;CXCL1;CXCL2;CXCL3;GSTP1;ANXA1;HCK;HMGB1;HMGB2;HNRNPU;HES1;DNAJA1;HSPA1A;HSPA1B;HSPA8;IRF8;ID3;IL1A;IL1B;CXCL8;IL10;IL18;INSIG1;IRAK1;IRAK2;AR;RHOA;LDLR;LEP;LPL;LTF;SCGB2A1;MGST…	4.55681	4.18e-44
GOBP_RESPONSE_TO_OXIDATIVE_STRESS	PPIF;NET1;KLF2;RACK1;FBLN5;PRDX4;ARL6IP5;TXNIP;PRDX3;PARK7;PLK3;COL1A1;NCOA7;ROMO1;CRYAB;CTNNB1;CYP1B1;DAPK1;NQO1;RCAN1;EDN1;EDNRA;AIF1;ENDOG;STX2;ERN1;PTK2B;STOX1;ALDH3B1;FOXO1;FOXO3;KDM6B;FOS;PRDX5;GATA4;GCH1;GJB2;GCLC;GCLM;H19;GPX3;GPX4;GSTP1;PYCR2;SLC25A24;ANXA1;HBA1;HBA2;HBB;HIF1A;HP;APEX1;HSPA1A;HSPA1B;HSPB1;APOD;APOE;IL1A;IL10;JUN;AREG;RHOB;MCL1;MAP3K5;MET;MGMT;MGST1;MMP2;MMP14;MT-CO1;MT-N…	5.52851	5.51e-44
GOBP_MACROMOLECULE_CATABOLIC_PROCESS	PDCD6IP;TOB1;TRIB1;STUB1;RACK1;LYPLA1;CLGN;IGF2BP2;OGA;CTSC;GIPC1;HNRNPA0;SEC61B;KCNQ1OT1;CHI3L1;CHIT1;IRAK3;PARK7;GABARAP;GABARAPL2;OMA1;CIRBP;CLU;ANAPC16;PLK3;UBXN10;SPATA18;SLFN13;CST3;CTNNB1;ADRA2A;CTSB;CTSD;CTSH;CTSK;CTSL;CTSS;CTSZ;DAB2;DNAAF4;DDX5;NQO1;EEF1A1;EFNA1;ENDOG;ERN1;PTK2B;USP12;FBXO21;FOXO1;TNRC6B;FLNA;UBXN4;TUT4;TRIM2;RYBP;PRAME;CARHSP1;CD2AP;HSPBP1;EDC4;LSM5;GABARAPL1;SDF2L1;CDC…	3.0487	1.47e-43
GOBP_POSITIVE_REGULATION_OF_CELL_ACTIVATION	CD24;CDKN1A;IGHV1-69D;LILRB2;CTSC;HSPH1;CORO1A;NLRP3;MAP3K8;CCN2;CD55;DPP4;GPR183;EGR3;AIF1;FGR;ZBTB1;FOXO3;FLNA;XRCC6;GAS6;GATA2;ABL2;IGHV6-1;IGHV5-51;IGHV4-61;IGHV4-59;IGHV4-39;IGHV4-34;IGHV4-4;IGHV3-74;IGHV3-53;IGHV3-49;IGHV3-48;IGHV3-33;IGHV3-30;IGHV3-23;IGHV3-21;IGHV3-20;IGHV3-15;IGHV3-13;IGHV3-11;IGHV3-7;IGHV2-5;IGHV1-18;IGHV1-3;PYCARD;ANXA1;HLA-A;HLA-DMA;HLA-DMB;HLA-DPA1;HLA-DPB1;HLA-DQA1;…	5.31831	1.59e-43
GOBP_CELL_CYCLE	PDCD6IP;ACTR2;SPRY1;CDKN1A;CDK2AP2;CDKN1C;CCNO;CITED2;TUBA1B;TUBB3;TUBB4B;RACK1;GPNMB;CIB1;TACC2;SMC2;HEXIM1;TXNIP;CETN2;CFL1;NUDC;GIPC1;SDCCAG8;TUBGCP2;RUVBL2;BLCAP;GADD45G;MORF4L1;BTG3;CCNI;CNTRL;TRIOBP;KIF3A;PHB2;EFHC1;CKS2;CLIC1;ANAPC16;CLTA;PLK3;MAP3K8;CCN2;CTNNB1;NEK10;MCMDC2;GADD45A;TOGARAM2;DDX3X;DUSP1;EDN1;EDNRA;AHR;EIF4E;EIF4G2;AIF1;CENPX;TUBB;EPB41L2;EPS8;EREG;ERH;MECOM;EVI2B;STOX1;PPP…	2.71689	3.21e-43
GOBP_ORGANOPHOSPHATE_METABOLIC_PROCESS	NAMPT;AASS;AKR1A1;ABCA8;CDS1;ATP5PD;DNPH1;ATP5MG;ALDH1L1;PLAAT3;SLC2A6;PARK7;PHB2;PTPMT1;CKB;ADCYAP1R1;AK7;NDUFA11;CSF1R;DGKH;DBI;SGMS2;NQO1;SLC26A2;EPHA2;ENO1;FABP5;ACSL1;ACSL3;ACSL4;PTK2B;AK9;FDFT1;FDPS;PLCB1;SLC44A1;QPRT;NUDT14;SERINC5;PGLS;MPC2;SAMHD1;GAPDH;REXO2;ZBTB20;GATA6;GCH1;NUPR1;SH3YL1;GK;GMPR;GPD1;H19;PGP;GPX4;GUCY1A2;GUK1;NME7;NT5C;HIF1A;HINT1;HMGCR;HMGCS1;HSPA1A;HSPA1B;HSPA8;APOC1;…	3.42393	1.24e-42
GOBP_ATP_BIOSYNTHETIC_PROCESS	ATP5PD;ATP5MG;NDUFA11;ENO1;AK9;H19;NDUFS7;MT-ATP6;MT-ATP8;MT-CO2;MT-ND1;MT-ND2;MT-ND3;MT-ND4;MT-ND4L;MT-ND5;MT-ND6;NDUFA1;NDUFA2;NDUFA3;NDUFA5;NDUFA7;NDUFA8;NDUFAB1;NDUFB1;NDUFB2;NDUFB3;NDUFB4;NDUFB5;NDUFB6;NDUFB7;NDUFB8;NDUFB9;NDUFC1;NDUFC2;NDUFS5;NDUFS6;NDUFV2;ATP5F1A;ATP5F1B;ATP5F1C;NDUFA13;ATP5F1D;ATP5F1E;ATP5PB;ATP5MC1;ATP5MC2;ATP5MC3;ATP5ME;ATP5PF;ATP6V1A;ATP6V0C;ATP5PO;NDUFB11;NDUFA12;SDHA…	17.9529	5.31e-42
GOBP_NUCLEOSIDE_TRIPHOSPHATE_BIOSYNTHETIC_PROCESS	ATP5PD;ATP5MG;AK7;NDUFA11;ENO1;AK9;H19;NME7;NDUFS7;MT-ATP6;MT-ATP8;MT-CO2;MT-ND1;MT-ND2;MT-ND3;MT-ND4;MT-ND4L;MT-ND5;MT-ND6;NDUFA1;NDUFA2;NDUFA3;NDUFA5;NDUFA7;NDUFA8;NDUFAB1;NDUFB1;NDUFB2;NDUFB3;NDUFB4;NDUFB5;NDUFB6;NDUFB7;NDUFB8;NDUFB9;NDUFC1;NDUFC2;NDUFS5;NDUFS6;NDUFV2;NME1;NME2;NME3;ATP5F1A;ATP5F1B;ATP5F1C;NDUFA13;ATP5F1D;ATP5F1E;ATP5PB;ATP5MC1;ATP5MC2;CMPK1;ATP5MC3;ATP5ME;ATP5PF;ATP6V1A;ATP6V…	13.6706	7.67e-42
GOBP_ATP_METABOLIC_PROCESS	ATP5PD;ATP5MG;SLC2A6;NDUFA11;ENO1;AK9;GAPDH;ZBTB20;NUPR1;GPD1;H19;HIF1A;HSPA1A;HSPA1B;HSPA8;IGF1;INSR;NDUFS7;LDHA;ARL2;MT-ATP6;MT-ATP8;MT-CO2;MT-ND1;MT-ND2;MT-ND3;MT-ND4;MT-ND4L;MT-ND5;MT-ND6;NDUFA1;NDUFA2;NDUFA3;NDUFA5;NDUFA7;NDUFA8;NDUFAB1;NDUFB1;NDUFB2;NDUFB3;NDUFB4;NDUFB5;NDUFB6;NDUFB7;NDUFB8;NDUFB9;NDUFC1;NDUFC2;NDUFS5;NDUFS6;NDUFV2;ATP1B1;NT5E;ATP5F1A;ATP5F1B;ATP5F1C;FIS1;NDUFA13;ATP5F1D;AT…	8.74963	8.3e-42
GOBP_NUCLEOBASE_CONTAINING_SMALL_MOLECULE_METABOLIC_PROCESS	NAMPT;AASS;ATP5PD;DNPH1;ATP5MG;ALDH1L1;SLC2A6;PARK7;AK7;NDUFA11;NQO1;DPYSL2;DPYSL3;SLC26A2;AHCY;EPHA2;ENO1;ERH;ACSL1;ACSL3;ACSL4;AK9;ENPP4;QPRT;NUDT14;PGLS;MPC2;SAMHD1;GAPDH;REXO2;ZBTB20;NUPR1;GMPR;GPD1;H19;GUCY1A2;GUK1;NME7;NT5C;HIF1A;HINT1;HMGCR;HMGCS1;HSPA1A;HSPA1B;HSPA8;IDH2;IGF1;APRT;IDO1;INSR;ITPA;NDUFS7;RHOA;LDHA;LDHB;ARL2;MDH1;MGAT1;MTHFD2L;MT-ATP6;MT-ATP8;MT-CO2;MT-ND1;MT-ND2;MT-ND3;MT-N…	4.16871	8.36e-42
GOBP_ENZYME_LINKED_RECEPTOR_PROTEIN_SIGNALING_PATHWAY	PDCD6;NAMPT;TOB1;SPRY1;STUB1;CDKN1C;CITED2;AGR2;SORBS1;TXNIP;GIPC1;SUB1;FERMT2;FSTL1;VASN;LRG1;COL1A1;COL1A2;COL3A1;COL4A1;COL4A2;COMP;CSF1R;CSNK2B;CCN2;CTNNB1;ADRA2A;DAB2;DCN;DDX5;DLX5;AGTR2;EFNA1;EGR1;EPHA2;ENG;EPHB6;ERBB3;EREG;F3;PTK2B;FBN1;EFEMP1;FGF7;FGR;FKBP1A;DKK1;FOXO1;SULF1;PLCB1;FOLR1;FOS;TSPAN12;FAM89B;GALNT3;TIPARP;GAS6;GATA4;GATA6;GFRA3;DNAI1;GPC3;PDCD4;GNAI2;CRB2;GRB2;RAPGEF1;SLC2A8…	3.40365	1.49e-41
GOBP_CYTOKINE_PRODUCTION	CD24;LILRB2;KLF2;SPON2;GPNMB;CEBPB;LAMTOR5;IGF2BP2;CHI3L1;IRAK3;PARK7;NLRP3;CARD16;CLU;COL3A1;CSF1R;ADRA2A;CYBA;BTNL9;CYBB;CYP1B1;CD55;DDT;DDX3X;EGR1;EPHA2;AIF1;SERPINB1;ELF1;EREG;F3;FCER1G;FCN1;FGR;FOXJ1;SULF1;PLCB1;FN1;CD2AP;LY96;CADM1;GAPDH;ZBTB20;TRAF3IP1;GAS6;CLEC4E;GATA4;GATA6;GBP1;PDCD4;H19;RGCC;PYCARD;GSTP1;ANXA1;ANXA4;HIF1A;HLA-A;HLA-B;HLA-DPA1;HLA-DPB1;HLA-DRB1;HLA-E;HMGB1;HMGB2;HSPA1A;…	3.71957	2.13e-41
GOBP_RESPONSE_TO_INORGANIC_SUBSTANCE	PDCD6;PPIF;RASGRP2;NET1;KLF2;RACK1;FBLN5;TXNIP;AHCYL1;PRDX3;PARK7;COL1A1;CRIP1;S100A16;SELENOM;CRYAB;CYBB;CYP1B1;DAXX;NQO1;EDN1;EDNRB;ENDOG;ERN1;PTK2B;SEC31A;FOXO1;FOXO3;KDM6B;PLCB1;FOS;FOSB;ALOX5AP;CLIC4;GCH1;GCLC;H19;ANK3;SLC25A24;SLC40A1;ANXA1;HBA1;HBA2;HBB;HIF1A;ANXA11;HNRNPA1;HP;APEX1;HSPA5;IGFBP2;IL1A;IL10;AQP3;IMPA2;JUN;JUNB;JUND;AREG;RHOB;MAP1B;MBP;MAP3K5;MET;MMP2;MT1E;MT1F;MT1G;MT1H;MT1M…	4.58044	2.53e-41
GOBP_ATP_SYNTHESIS_COUPLED_ELECTRON_TRANSPORT	UQCR11;PARK7;COX4I1;COX5B;COX6A1;COX6B1;COX6C;COX7A2;COX7B;COX7C;COX8A;UQCRQ;DNAJC15;UQCR10;NDUFS7;MT-CO1;MT-CO2;MT-CO3;MT-CYB;MT-ND1;MT-ND2;MT-ND3;MT-ND4;MT-ND4L;MT-ND5;MT-ND6;NDUFA1;NDUFA2;NDUFA3;NDUFA4;NDUFA5;NDUFA7;NDUFA8;NDUFAB1;NDUFB1;NDUFB2;NDUFB3;NDUFB4;NDUFB5;NDUFB6;NDUFB7;NDUFB8;NDUFB9;NDUFC1;NDUFC2;NDUFS5;NDUFS6;NDUFV2;CHCHD2;CYCS;NDUFA12;BID;SDHA;SDHC;UQCRB;UQCRC2;UQCRH;UQCC3;COX5A	18.5939	3.42e-41
GOBP_ORGANONITROGEN_COMPOUND_CATABOLIC_PROCESS	PDCD6IP;AASS;TRIB1;STUB1;RACK1;CPQ;LYPLA1;CLGN;DNPH1;OGA;CTSC;GIPC1;ALDH1L1;SEC61B;CHI3L1;CHIT1;IRAK3;PARK7;GABARAP;GABARAPL2;OMA1;CLU;ANAPC16;PLK3;UBXN10;COMT;SPATA18;CST3;CTNNB1;ADRA2A;CTSB;CTSD;CTSH;CTSK;CTSL;CTSS;CTSZ;DAB2;DNAAF4;NQO1;DIO2;DPYSL2;DPYSL3;ECHS1;AHCY;EEF1A1;EFNA1;LVRN;ETFB;PTK2B;USP12;ENPP4;FBXO21;FOXO1;FLNA;UBXN4;TRIM2;RYBP;SLC44A1;QPRT;PRAME;DDAH2;DDAH1;CD2AP;HSPBP1;SDF2L1;CDC…	2.96956	5.18e-41
GOBP_WOUND_HEALING	CDKN1A;MYL9;PROCR;MYL12A;PDPN;FERMT2;LRG1;CLIC1;JAML;COL1A1;COL3A1;COL5A1;COMP;DCBLD2;CLDN4;CLDN3;CSRP1;ADRA2A;ADRA2C;DGKH;DSP;EDN1;ERBB3;EREG;F3;FBLN1;FCER1G;JMJD1C;ENPP4;FLNA;FN1;MACF1;ALOX12;GAS6;GATA2;GATA4;MYOF;B4GALT1;CHMP2A;GNAS;CHMP4A;ANXA1;ANXA2;HBB;ANXA5;HIF1A;HSPB1;IGF1;APOE;CCN1;IL1A;IL6ST;ILK;ITGA5;ITGB1;RHOA;RHOC;LCP1;LMAN1;MAP3K5;MSX2;NFE2L2;DDR2;SERPINE1;SERPINB2;F11R;TNFRSF12A;CH…	5.2056	7.16e-41
GOBP_ION_TRANSPORT	MRLN;COX17;PPIF;AKAP9;RAMP1;LILRB2;ATP5PD;CEBPB;ARL6IP5;SLC34A2;PDPN;ATP5MG;GIPC1;AHCYL1;MAGED2;CORO1A;SLC2A6;PARK7;PHB2;ADCYAP1R1;SLC16A10;CLIC1;CLIC2;CLNS1A;SLC15A4;SLC25A29;SLC51B;SLC43A2;OSR1;COX4I1;COX5B;EMB;COX6A1;COX6B1;COX7B;COX8A;CP;CLDN4;TMEM37;TMC4;CCN2;CTNNB1;ADRA2A;EFHB;ADRA2C;CTSS;CYB5A;CYBA;CYBB;CNKSR3;DAPK1;SLC26A2;EDN1;EDNRA;EDNRB;GRAMD2A;PTK2B;LRRC55;MAPK15;FKBP1A;FLNA;ARL6IP1;A…	2.80127	9.69e-41
GOBP_EPITHELIAL_CELL_PROLIFERATION	PDCD6;CDKN1C;CEBPB;KDM5B;PHB2;OSR2;LRG1;JAML;COL8A1;OSR1;CTNNB1;CYBA;FMC1;DAB2;ARX;DLX5;JAG1;ECM1;EDNRB;EGR3;EPHA2;SERPINB1;EREG;ERN1;ESR1;F3;FGF7;SULF1;IFT172;GATA2;EHF;NUPR1;B4GALT1;INTU;GPC3;GLUL;SFN;ANG;NEAT1;GRN;RGCC;HIF1A;HMGB1;HMGB2;HMGN1;NR4A1;HES1;ID1;ID2;IGF1;APOE;IGFBP3;IGFBP4;IGFBP5;RBPJ;IHH;IL10;IRF6;AR;JUN;AREG;LAMA5;LAMB1;LEP;LIMS1;LIPA;TACSTD2;MDK;MMP14;MYC;NFIB;NME1;NME2;ATP5F1A;…	4.88158	1.17e-40
GOBP_MUSCLE_STRUCTURE_DEVELOPMENT	CDH2;CITED2;MYL9;BASP1;DDX17;PDLIM5;VAMP5;EHD1;ADAMTS5;AKAP13;COL3A1;COL6A3;COL11A1;COMP;ADM;MTPN;MYL6B;CRYAB;CSRP1;CSRP2;CTNNB1;TCF23;CXADR;DDX5;DES;JAG1;RCAN1;DSP;EDN1;EDNRA;EDNRB;EGR1;EGR3;ELN;ENG;ERBB3;EREG;PI16;FKBP1A;DKK1;KDM6B;FLNB;FLNC;PLCB1;ATP11A;SYNE1;FOS;MAFF;CBY1;GATA4;GATA6;NUPR1;MYOF;SERP1;PDCD4;PDLIM3;EFEMP2;NR4A1;HNRNPU;HES1;ID2;ID3;IFRD1;IGF1;IGFBP3;IGFBP5;RBPJ;IL18;ITGB1;RHOA;K…	4.05726	1.27e-40
GOBP_REGULATION_OF_CELLULAR_RESPONSE_TO_STRESS	DNAJB6;ACTR2;HIPK3;PIGBOS1;RACK1;FBLN5;ARL6IP5;AGR2;RUVBL2;GADD45G;MORF4L1;TMED2;ERP29;PARK7;CLU;NCOA7;CCN2;CTNNB1;GADD45A;DDX5;DUSP1;ENDOG;ENO1;ERN1;MECOM;EYA2;PTK2B;FOXO1;FOXO3;FLNA;PLCB1;DDAH1;PPP1R15A;FUS;SVIP;GATA4;GCH1;NUPR1;CHORDC1;PDCD4;H19;GPS2;GRN;PYCARD;GSTP1;HIC1;HIF1A;HMGB1;HNRNPK;PRMT1;DNAJA1;HSPA1A;HSPA5;HSPB1;DNAJB1;IGFBP6;IL1A;IL1B;IL10;INSIG1;LEP;MCL1;DNAJB9;MDM2;MAP3K5;MET;MGMT…	3.92898	2.23e-40
GOBP_REGULATION_OF_CELLULAR_LOCALIZATION	CDH2;DNAJB6;MRLN;RACK1;LYPLA1;CIB1;LAMTOR5;AGR2;SORBS1;EHD1;ERP29;FERMT2;CHGA;PKIG;PARK7;ADCYAP1R1;AP2M1;SLC51B;PLK3;LRRC15;CRYAB;CTNNA1;CTNNB1;ADRA2A;CTSD;DAB2;EDNRA;EPHA2;DZIP1L;C9orf72;EPB41L2;ACSL3;ACSL4;MAPK15;FKBP1A;FOXO1;FLNA;WWC1;CD2AP;SVIP;MPC2;TMEM98;GAS1;GAS6;GAS8;GBP1;B9D1;GPC3;SERP1;GLUL;SFN;ANG;ANK3;RANGRF;GSN;ANXA2;HCLS1;TAX1BP3;HIF1A;HLA-DRB1;HMGCR;HNRNPAB;DNAJA1;HSPA8;HSP90AA1;HS…	3.44972	2.48e-40
GOBP_HEART_DEVELOPMENT	SPRY1;CDKN1A;CITED2;BASP1;SEMA3C;PDLIM5;HEXIM1;TMED2;CNTRL;ADAMTS6;AKAP13;DNAAF1;COL3A1;PIFO;COL5A1;COL11A1;OSR1;ADM;CPE;CRIP1;CTNNB1;CXADR;DNAAF4;DNAH5;JAG1;DSG2;DSP;DUSP6;EDN1;EDNRA;EFNA1;ELN;ENG;ERBB3;FBN1;PI16;FKBP1A;DKK1;FOXJ1;CLUAP1;KDM6B;FLNA;RPGRIP1L;FN1;FOLR1;CBY1;IFT172;GATA4;GATA6;GJA1;DNAI1;GJA5;CACYBP;GPC3;PDCD4;PDLIM3;GNG5;HIF1A;HNRNPU;PRMT1;HES1;ID2;CCDC39;ID3;IGF1;CCN1;RBPJ;DNAAF3…	4.30219	4.01e-40
GOBP_REGULATION_OF_PROTEIN_PHOSPHORYLATION	CD24;HIPK3;AKAP9;TRIB1;SPRY1;CDKN1A;CDKN1C;CCNO;RACK1;GPNMB;CIB1;HEXIM1;TMED2;ERP29;FERMT2;CCNI;PKIG;CHI3L1;IRAK3;AKAP13;PARK7;PHB2;CKS2;CLU;CLDN3;CSF1R;CSNK2B;CCN2;ADRA2A;ADRA2C;NEK10;CNKSR3;DAB2;DAXX;GADD45A;DDX3X;DUSP1;DUSP6;EDN1;EDNRB;EFNA1;EGR1;AIF1;ENG;C9orf72;ERBB3;EREG;ERN1;ACSL1;PTK2B;FBLN1;STOX1;FGF7;FGR;MAPRE3;DKK1;FN1;ARL2BP;PLXNB2;XRCC6;TRAF3IP1;GAS6;CHORDC1;PDCD4;SFN;ANG;RGCC;PYCARD…	3.19745	5.02e-40
GOBP_CENTRAL_NERVOUS_SYSTEM_DEVELOPMENT	CDH2;CDH11;ARPC5;CITED2;BASP1;SEMA6B;TACC2;TUBGCP2;YWHAQ;C12orf57;EFHC1;CKB;CLU;MSI2;COL3A1;COL4A1;COX6B1;COX7B;MTPN;CLDN3;CSF1R;VCAN;CTNNB1;CTNND1;ARX;DLX5;DNAH5;DPYSL2;AGTR2;AIF1;EMX2;EPHB6;ALDH1A3;PHACTR1;DKK1;FOXJ1;CLUAP1;FOXO3;SYNE2;PLCB1;RPGRIP1L;SUN1;PLXNB2;CADM1;NEGR1;DPCD;TMEM98;IFT172;GAS8;PHGDH;GATA2;UQCRQ;INTU;GPR17;GRN;GSN;GSTP1;ANXA3;HIF1A;HES1;HSPA5;HSP90AA1;HSP90AB1;DNAJB1;APLP2;I…	3.27104	7.87e-40
GOBP_CELL_MORPHOGENESIS	CDH2;CDH11;ACTR2;ARPC2;WASF2;KLF2;TUBB3;MYL12B;CFDP1;SEMA6B;SEMA3C;CIB1;CDC42EP3;PDLIM5;MYL12A;PDPN;SPINT2;CFL1;FERMT2;TRIOBP;CORO1A;C12orf57;CLU;FGD4;COL15A1;EMB;CLDN4;CLDN3;CRABP2;CSF1R;CTNNB1;CUX1;DAB2;ARX;DLX5;DPYSL2;EDN1;EDNRA;EFNA1;RILPL2;EPHA2;CTTN;C9orf72;EPHB6;EPS8;ALCAM;PTK2B;FBLN1;PHACTR1;CDHR3;FGR;DKK1;PALLD;EPB41L3;FLNA;FLNB;ARC;COBL;FN1;MACF1;PLXNB2;CLIC4;GBP1;GFRA3;GOLGA4;ANK3;ANXA…	3.32483	9e-40
GOBP_NEURON_DEVELOPMENT	CDH2;CDH11;ACTR2;TUBB3;SEMA6B;SEMA3C;CIB1;PDLIM5;CFL1;EHD1;IFT27;TRIOBP;C12orf57;CTHRC1;ADM;EMB;CRABP2;CSF1R;CTNNA1;CTNNB1;CUX1;DAB2;ARX;DLX5;DPYSL2;DPYSL3;EDN1;EDNRA;EDNRB;EFNA1;EPHA2;CTTN;C9orf72;EPHB6;ALCAM;PTK2B;PHACTR1;DKK1;PALLD;EPB41L3;FLNA;ARC;COBL;DENND5A;RPGRIP1L;FN1;FOLR1;MACF1;PLXNB2;MTCH1;NEGR1;PHGDH;GATA2;BLOC1S1;ADGRF1;GFRA3;ABL2;UQCRQ;GOLGA4;CRB2;ANK3;RAPGEF1;GRN;MYLIP;HMGB1;PRMT1…	3.19398	1.27e-39
GOBP_EMBRYONIC_MORPHOGENESIS	DNAJB6;CITED2;RACK1;SPINT2;TMED2;TRIOBP;CTHRC1;OSR2;DNAAF1;COL4A2;COL5A1;COL5A2;COL6A1;COL8A1;COL11A1;COL12A1;OSR1;ADM;CRABP2;CTNNB1;DLX5;DUSP1;DUSP2;EDN1;EDNRA;EFNA1;EPHA2;ENG;HIPK1;ETS2;EYA2;STOX1;ALDH1A3;FBN1;EFEMP1;PPP1R35;DKK1;CLUAP1;KDM6B;SULF1;COBL;RPGRIP1L;FN1;FOLR1;PLXNB2;SYF2;IFT172;GATA2;GATA4;GATA6;GJA1;B9D1;INTU;GPC3;CRB2;GRB2;HIF1A;HOXA10;HOXB5;HOXB6;HOXB7;HES1;HSBP1;ID2;CCDC39;CCN1…	4.24631	1.36e-39
GOBP_ELECTRON_TRANSPORT_CHAIN	UQCR11;PARK7;ADH5;COX4I1;COX5B;COX6A1;COX6B1;COX6C;COX7A2;COX7B;COX7C;COX8A;CYB5A;CYB561;CYBA;CYBB;ETFB;ALDH2;PHGDH;UQCRQ;GPD1;DNAJC15;UQCR10;IDO1;NDUFS7;MT-CO1;MT-CO2;MT-CO3;MT-CYB;MT-ND1;MT-ND2;MT-ND3;MT-ND4;MT-ND4L;MT-ND5;MT-ND6;NCF2;NDUFA1;NDUFA2;NDUFA3;NDUFA4;NDUFA5;NDUFA7;NDUFA8;NDUFAB1;NDUFB1;NDUFB2;NDUFB3;NDUFB4;NDUFB5;NDUFB6;NDUFB7;NDUFB8;NDUFB9;NDUFC1;NDUFC2;NDUFS5;NDUFS6;NDUFV2;CHCHD2;…	9.96676	1.82e-39
GOBP_REGULATION_OF_CATABOLIC_PROCESS	TOB1;TRIB1;STUB1;RACK1;IGF2BP2;GIPC1;HNRNPA0;KCNQ1OT1;DEPP1;SLC2A6;IRAK3;PARK7;GABARAP;GABARAPL2;CIRBP;CLU;PLK3;DRAM2;CST3;ADRA2A;FMC1;DAB2;DAPK1;DNAAF4;DCN;NQO1;EEF1A1;EIF4E;EIF4G2;CTTN;ENDOG;C9orf72;ERN1;PTK2B;MAPK15;FOXO1;FOXO3;TNRC6B;FLNA;TUT4;RYBP;CARHSP1;HSPBP1;ATP6V1C2;FUS;RNF144B;SVIP;ARIH1;RNF19A;GAPDH;TIPARP;SERBP1;ZBTB20;GATA4;HSPB8;NUPR1;PABPC1;ABL2;GPC3;LSM1;GCLC;GPD1;DCPS;CHMP4A;SLC…	3.33387	2.33e-39
GOBP_MAPK_CASCADE	CDH2;CD24;HIPK3;TRIB1;SPRY1;TNIP1;GPNMB;CIB1;ARL6IP5;MAP3K2;GADD45G;ERP29;FERMT2;CHI3L1;IRAK3;AKAP13;CAVIN3;PHB2;MAP3K8;CRYAB;CSF1R;CCN2;CTNNB1;ADRA2A;CTSH;ADRA2C;NEK10;CNKSR3;ADRB3;DAB2;DAXX;GADD45A;DDT;DUSP1;DUSP2;DUSP6;GPR183;EDN1;EFNA1;EPHA2;ERN1;MECOM;PTK2B;FBLN1;MAPK15;DKK1;FOXO1;PLCB1;WWC1;FN1;GAS6;GATA4;GBP1;PDCD4;GNAI2;RNF149;GPS2;GRB2;LAMTOR2;PYCARD;GSTP1;HLA-DRB1;HMGB1;HMGCR;PRMT1;DNAJ…	3.7061	2.66e-39
GOBP_REGULATION_OF_TRANSFERASE_ACTIVITY	CD24;HIPK3;TRIB1;SPRY1;CDKN1A;STUB1;CDKN1C;CCNO;RACK1;CIB1;HEXIM1;PTGES3;PRDX3;ERP29;FERMT2;CCNI;PKIG;CHI3L1;IRAK3;AKAP13;PARK7;PHB2;CKS2;CLU;PIFO;CSF1R;CTNNB1;ADRA2A;ADRA2C;NEK10;DAB2;DAXX;DBI;GADD45A;DDX3X;DUSP1;EDN1;EEF1A1;EFNA1;EGR1;EPHA2;EIF4A2;EPHB6;ERBB3;EREG;ERN1;ACSL1;PTK2B;STOX1;MAPK15;FGR;MAPRE3;DKK1;XRCC6;SERINC5;PARM1;GAS6;CHORDC1;PDCD4;UBE2S;SFN;ANG;RGCC;PHPT1;PYCARD;GSTP1;SERTAD1;H…	3.46015	4.02e-39
GOBP_NEGATIVE_REGULATION_OF_DEVELOPMENTAL_PROCESS	TOB1;TRIB1;SPRY1;CDKN1A;KLF2;CITED2;N4BP2L2;SEMA6B;SEMA3C;CIB1;FGL2;FERMT2;CCDC85B;VASN;OMA1;TWIST2;COL4A2;COL5A1;COL5A2;OSR1;CST3;CTNNA1;CTNNB1;TCF23;CTSK;CXADR;ADRB3;DCN;GADD45A;JAG1;ECM1;EDNRB;EFNA1;EPHA2;EIF4E;EREG;PTK2B;FBLN1;FBN1;EFEMP1;PI16;DKK1;FOXJ1;FOXO1;FOXO3;STAB1;SULF1;WWC1;PRAME;NR5A1;SPDEF;TMEM98;GAS6;GATA2;GBP1;PDCD4;LSM1;GPS2;TMEM176B;RGCC;GTF2I;ANXA1;HIF1A;HMGB1;HNRNPU;PRMT1;HES…	3.32002	5.8e-39
GOBP_RESPIRATORY_ELECTRON_TRANSPORT_CHAIN	UQCR11;PARK7;COX4I1;COX5B;COX6A1;COX6B1;COX6C;COX7A2;COX7B;COX7C;COX8A;ETFB;UQCRQ;GPD1;DNAJC15;UQCR10;NDUFS7;MT-CO1;MT-CO2;MT-CO3;MT-CYB;MT-ND1;MT-ND2;MT-ND3;MT-ND4;MT-ND4L;MT-ND5;MT-ND6;NDUFA1;NDUFA2;NDUFA3;NDUFA4;NDUFA5;NDUFA7;NDUFA8;NDUFAB1;NDUFB1;NDUFB2;NDUFB3;NDUFB4;NDUFB5;NDUFB6;NDUFB7;NDUFB8;NDUFB9;NDUFC1;NDUFC2;NDUFS5;NDUFS6;NDUFV2;CHCHD2;CYCS;NDUFA12;BID;SDHA;SDHC;SOD2;UQCRB;UQCRC2;UQCRH…	13.9179	1.34e-38
GOBP_NEGATIVE_REGULATION_OF_RNA_METABOLIC_PROCESS	DNAJB6;TOB1;AASS;CDKN1C;SAP18;KLF2;CITED2;BASP1;C1D;N4BP2L2;CEBPB;CEBPD;HEXIM1;TXNIP;IGF2BP2;KDM5B;RUVBL2;MAGED2;HNRNPA0;YWHAQ;CCDC85B;PKIG;PHB2;CIRBP;OSR2;TWIST2;CDYL2;PLK3;OSR1;CREM;CRYAB;CTNNB1;TCF23;CUX1;DAB2;DAXX;GADD45A;AEBP1;DDX5;TLE5;GLIS3;ARX;EDN1;EDNRB;EFNA1;EGR1;AHR;EIF4A2;ELF3;ENO1;EREG;ESR1;ETS2;ETV3;MECOM;JAZF1;TFEC;ZBTB1;DKK1;FOXJ1;FOXO1;FOXO3;FLNA;PLCB1;WWC1;RYBP;PRAME;FOSB;ZMYND8…	2.84777	2.28e-38
GOBP_IMMUNE_SYSTEM_DEVELOPMENT	WASF2;TRIB1;LILRB2;KLF2;CITED2;N4BP2L2;CEBPB;CIB1;CEBPD;PDPN;FGL2;PRDX3;KDELR1;IRAK3;NLRP3;SLC15A4;KLF6;CRIP2;CSF1R;CSF3R;TMEM190;CTNNB1;CTSK;CTSL;JAG1;GPR183;EEF2;EGR1;EGR3;EPHA2;HIPK1;ALAS2;MECOM;EVI2B;PTK2B;FBN1;FCER1G;ZBTB1;FOXJ1;FOXO3;FLNA;PRRC2C;FOS;XRCC6;SAMHD1;TIPARP;TMEM98;GAS6;GATA2;CLEC4E;PRELID1;GPC3;GPS2;TMEM176B;SLC25A5;SLC40A1;ANXA1;ANXA2;HCLS1;HIF1A;HLA-B;HLA-DRA;HLA-DRB1;HLA-E;HM…	3.25282	2.73e-38
GOBP_MEMBRANE_ORGANIZATION	CDH2;CD24;PDCD6IP;PDCD6;TOMM6;PPIF;IGHV1-69D;NPC2;MTX2;TMED2;RAB31;PLAAT3;CORO1A;OMA1;AP2M1;CLU;MICOS13;TRAPPC5;COL5A1;ROMO1;CTSL;DPP4;RILPL2;AIF1;STX2;EYA2;MAPK15;SEC31A;EPB41L3;ARL6IP1;ATP11A;SUN1;TRAM1;FOLR1;MTCH1;ABCA4;SAMM50;GAS6;GATA2;ARFGAP3;MYOF;TIMM13;TIMM8B;PRELID1;SERP1;CHMP2A;GCLC;IGHV6-1;IGHV5-51;IGHV4-61;IGHV4-59;IGHV4-39;IGHV4-34;IGHV4-4;IGHV3-74;IGHV3-53;IGHV3-49;IGHV3-48;IGHV3-33…	3.49744	2.93e-38
GOBP_PHAGOCYTOSIS	IGHV1-69D;RACK1;SPON2;LMAN2;RAB31;CORO1A;CYBA;AIF1;FCER1G;FCN1;FGR;CD93;GAS6;GATA2;IGHV6-1;IGHV5-51;IGHV4-61;IGHV4-59;IGHV4-39;IGHV4-34;IGHV4-4;IGHV3-74;IGHV3-53;IGHV3-49;IGHV3-48;IGHV3-33;IGHV3-30;IGHV3-23;IGHV3-21;IGHV3-20;IGHV3-15;IGHV3-13;IGHV3-11;IGHV3-7;IGHV2-5;IGHV1-18;IGHV1-3;PYCARD;GSN;ANXA1;HCK;ANXA3;ANXA11;HMGB1;ICAM3;IRF8;IGHA1;IGHA2;IGHG1;IGHG2;IGHG4;IGHM;IGKC;IL1B;ITGAM;ITGB1;ITGB2;…	6.26194	6.01e-38
GOBP_REGULATION_OF_CELLULAR_COMPONENT_BIOGENESIS	PDCD6IP;DNAJB6;ARPC5;ARPC3;ARPC1B;ACTR2;ARPC2;AKAP9;WASF2;STUB1;RACK1;CXCL13;CDC42EP3;PDLIM5;SDCCAG8;FERMT2;TRIOBP;CHGA;CORO1A;PARK7;SYNPO;RAB3IP;CLU;ADD3;COL16A1;MTPN;CLDN3;CLDN7;CRYAB;CCN2;DDX3X;DPYSL3;EPHA2;ELN;CTTN;C9orf72;EPS8;ESR1;PTK2B;PPP1R35;MAPK15;MAPRE3;DKK1;FLNA;SYNE2;COBL;COTL1;MACF1;RPL13A;NEGR1;SVIP;TRAF3IP1;NUPR1;SH3YL1;INTU;CHMP2A;GRB2;RAPGEF1;RGCC;CHMP4A;ORMDL2;RANGRF;DNAJC15;PY…	3.29805	6.71e-38
GOBP_HUMORAL_IMMUNE_RESPONSE	IGHV1-69D;WFDC2;SPON2;CXCL13;GNLY;MASP2;PHB2;CLU;ROMO1;CD55;DEFB1;CFD;GPR183;A2M;FAU;FCN1;FOXJ1;GAPDH;GATA6;ANG;IGHV6-1;IGHV5-51;IGHV4-61;IGHV4-59;IGHV4-39;IGHV4-34;IGHV4-4;IGHV3-74;IGHV3-53;IGHV3-49;IGHV3-48;IGHV3-33;IGHV3-30;IGHV3-23;IGHV3-21;IGHV3-20;IGHV3-15;IGHV3-13;IGHV3-11;IGHV3-7;IGHV2-5;IGHV1-18;IGHV1-3;IGKV3-20;RGCC;CXCL1;CXCL2;CXCL3;CFH;HLA-A;HLA-DQB1;HLA-DRB1;HLA-E;HMGN2;CFI;IGHA1;IGH…	6.12201	1.14e-37
GOBP_INTRINSIC_APOPTOTIC_SIGNALING_PATHWAY	CD24;PPIF;CDKN1A;RACK1;CEBPB;ARL6IP5;IVNS1ABP;ERP29;PARK7;PTPMT1;CLU;CRIP1;CYP1B1;DDX3X;DDX5;EPHA2;EIF5A;ENO1;HIPK1;ERN1;PPP1R15A;NUPR1;SFN;PYCARD;HIC1;HIF1A;HINT1;HNRNPK;DNAJA1;HSPA1A;HSPB1;IFI16;MCL1;MDM2;MAP3K5;MIF;MSX1;MUC1;MYC;NFE2L2;P4HB;RRM2B;FIS1;RPS27L;NDUFA13;PIK3R1;PLAUR;PMAIP1;IL20RA;CYCS;DNAJC10;DDIT4;PPIA;USP47;SELENOS;PTGS2;FNIP2;PTPN1;SELENOK;BCL2;BCL2A1;RPL11;RPL26;RPS3;RPS7;S100…	6.34358	1.42e-37
GOBP_PURINE_CONTAINING_COMPOUND_METABOLIC_PROCESS	AASS;ATP5PD;DNPH1;ATP5MG;SLC2A6;NDUFA11;SLC26A2;AHCY;EPHA2;ENO1;ACSL1;ACSL3;ACSL4;AK9;ENPP4;MPC2;SAMHD1;GAPDH;ZBTB20;NUPR1;GMPR;GPD1;H19;GUCY1A2;GUK1;NME7;NT5C;HIF1A;HINT1;HMGCR;HMGCS1;HSPA1A;HSPA1B;HSPA8;IGF1;APRT;INSR;ITPA;NDUFS7;RHOA;LDHA;ARL2;MTHFD2L;MT-ATP6;MT-ATP8;MT-CO2;MT-ND1;MT-ND2;MT-ND3;MT-ND4;MT-ND4L;MT-ND5;MT-ND6;NDUFA1;NDUFA2;NDUFA3;NDUFA5;NDUFA7;NDUFA8;NDUFAB1;NDUFB1;NDUFB2;NDUFB3;…	4.56095	2.47e-37
GOBP_CELL_CELL_SIGNALING	CDH2;CD24;CDH11;NAMPT;AKAP9;LILRB2;RACK1;GPNMB;CXCL13;GIPC1;KDM5B;RUVBL2;FERMT2;CHGA;PARK7;GABARAP;CTHRC1;SLC16A10;COL1A1;ADM;CPE;SELENOM;CSNK2B;APCDD1;CTNNB1;ADRA2A;CTNND1;ADRA2C;IGSF11;CXADR;DAB2;DDX3X;TLE5;NQO1;DLX5;EDN1;EDNRA;EDNRB;EFNA1;EGR1;EGR3;EIF4E;STX2;EREG;FABP5;ACSL4;PTK2B;FGF7;DKK1;FOXO1;FOXO3;FLNA;STAB1;SULF1;PLCB1;ARC;FOLR1;MACF1;ATP6V1C2;GABRP;CBY1;MPC2;SPEF1;RNF19A;PNKD;GATA4;GAT…	2.63562	3.76e-37
GOBP_NEGATIVE_REGULATION_OF_NUCLEOBASE_CONTAINING_COMPOUND_METABOLIC_PROCESS	DNAJB6;TOB1;AASS;CDKN1A;CDKN1C;SAP18;KLF2;CITED2;BASP1;C1D;N4BP2L2;CEBPB;CEBPD;HEXIM1;TXNIP;IGF2BP2;KDM5B;RUVBL2;MAGED2;SUB1;HNRNPA0;YWHAQ;CCDC85B;PKIG;PHB2;CIRBP;OSR2;TWIST2;CDYL2;PLK3;OSR1;CREM;CRYAB;CTNNB1;TCF23;CUX1;DAB2;DAXX;GADD45A;AEBP1;DDX5;TLE5;GLIS3;ARX;EDN1;EDNRB;EFNA1;EGR1;AHR;EIF4A2;ELF3;ENO1;EREG;ESR1;ETS2;ETV3;MECOM;JAZF1;TFEC;ZBTB1;DKK1;FOXJ1;FOXO1;FOXO3;FLNA;PLCB1;WWC1;RYBP;PRAME…	2.6999	1.03e-36
GOBP_CELLULAR_RESPONSE_TO_HORMONE_STIMULUS	NAMPT;RAMP1;DDX17;SORBS1;PTGES3;AHCYL1;RAB31;PARK7;PHB2;FBXO32;CSNK2B;SRARP;ADRA2A;CTSB;CTSH;CTSL;CTSS;CYBA;CYP1B1;DAB2;DNAAF4;DAXX;DDX5;AGTR2;EDN1;EDNRA;EIF4E;AIF1;ESR1;ACSL1;FBN1;FOXO1;FOXO3;PLCB1;FOS;FOSB;NR5A1;KANK2;GATA6;DNAI1;GJB2;GCLC;GCLM;GNAI2;TRARG1;GRB2;SLC2A8;ANXA1;NR4A1;HNRNPU;APEX1;DNAJA1;HSPA1A;HSPA1B;HSPA8;IGFBP1;IGFBP2;IGFBP7;APRT;IL1B;INSIG1;INSR;AR;RHOA;LEP;LEPR;LPL;MAP1B;SCGB2…	4.12393	1.07e-36
GOBP_RESPONSE_TO_OXYGEN_LEVELS	CD24;STUB1;CITED2;PDPN;PHB2;CARD16;VASN;PLK3;COL1A1;ADM;CLDN3;CRYAB;CCN2;CYBA;CYBB;DPP4;EDN1;EDNRA;AHCY;EGR1;ENDOG;ENO1;ALAS2;PTK2B;STOX1;FOXO1;FOXO3;FOS;DDAH1;GATA6;FAM162A;ANG;RGCC;GUCY1A2;SLC2A8;NOP53;HIF1A;RBPJ;IL1A;AQP3;IRAK1;JUND;MALAT1;RHOA;LEP;LMNA;MDM2;MMP2;MMP14;MT-ATP6;MT-ND4;MT-ND5;MYC;NFE2L2;ATP1B1;DDR2;NR4A2;P4HB;PAM;HP1BP3;CHCHD2;ATP6V1A;PGK1;PLAT;PLOD2;PMAIP1;DDIT4;AGTRAP;PTGIS;PT…	5.76584	1.19e-36
GOBP_MITOCHONDRION_ORGANIZATION	PET100;TOMM6;COX17;PPIF;MTX2;PRDX3;PARK7;PHB2;GABARAP;GABARAPL2;OMA1;COX20;CLU;SPATA33;MICOS13;NDUFA11;SPATA18;COX7A2;ROMO1;CTSK;CXADR;FMC1;DCN;EDN1;EDNRA;HIGD2A;CTTN;ENDOG;EYA2;STOX1;GABARAPL1;SAMM50;NIPSNAP2;FAM162A;TIMM13;TIMM8B;PRELID1;GCLC;GCLM;SFN;NDUFAF8;COA3;SLC25A4;DNAJC15;PYCARD;SLC25A5;SLC25A6;HIF1A;HSPA1A;HSPA9;HSP90AA1;HSPD1;IGF1;NDUFS7;LMAN1;LMNA;CHCHD10;TOMM5;MARCKS;ARRB2;MICOS10;M…	4.33794	1.4e-36
GOBP_DEVELOPMENTAL_PROCESS_INVOLVED_IN_REPRODUCTION	DNAJB6;CITED2;WFDC2;BASP1;CEBPB;CIB1;PRDX4;SPINT2;CETN2;KDM5B;ADAM28;PRDX3;TMED2;CCNI;IFT27;PHB2;ADCYAP1R1;OSR1;PACRG;CREM;CRIP1;CFAP54;CREB3L4;CTNNA1;CTNNB1;CTSB;TCF23;CFAP206;CYP1B1;DEFB1;EDN1;EDNRA;A2M;SPAG17;CFAP221;EREG;ESR1;PTK2B;FOXJ1;FOXO3;SULF1;TUT4;SYNE1;SUN1;CADM1;NR5A1;CFAP65;CATSPERD;GALNT3;DPCD;TIPARP;RAI14;SPAG8;GATA4;GATA6;MYCBP;NUPR1;B4GALT1;GJA1;GJB2;ANG;TSSK4;CFAP157;CFAP47;GPX…	3.26844	2.25e-36
GOBP_LEUKOCYTE_MEDIATED_IMMUNITY	IGHV1-69D;TUBB4B;SPON2;MASP2;CTSC;CHGA;CORO1A;NLRP3;CLU;SLC15A4;CTSH;CD55;JAG1;AHR;GAPT;TUBB;FCER1G;FGR;ZBTB1;FOXJ1;CADM1;GATA2;IGHV6-1;IGHV5-51;IGHV4-61;IGHV4-59;IGHV4-39;IGHV4-34;IGHV4-4;IGHV3-74;IGHV3-53;IGHV3-49;IGHV3-48;IGHV3-33;IGHV3-30;IGHV3-23;IGHV3-21;IGHV3-20;IGHV3-15;IGHV3-13;IGHV3-11;IGHV3-7;IGHV2-5;IGHV1-18;IGHV1-3;ANXA3;HLA-A;HLA-B;HLA-DMA;HLA-DMB;HLA-DPA1;HLA-DPB1;HLA-DQA1;HLA-DQA2…	4.71979	5.17e-36
GOBP_HEAD_DEVELOPMENT	CDH2;ARPC5;BASP1;SEMA6B;TACC2;TUBGCP2;YWHAQ;C12orf57;EFHC1;CKB;OSR2;COL1A1;COL3A1;COL4A1;COX6B1;MTPN;CSF1R;CTNNB1;CTNND1;ARX;DLX5;DNAH5;DPYSL2;AGTR2;EDNRA;AIF1;EMX2;ALDH1A3;PHACTR1;DKK1;FOXJ1;FOXO3;SYNE2;PLCB1;RPGRIP1L;SUN1;PLXNB2;CADM1;NEGR1;DPCD;TIPARP;IFT172;GAS8;PHGDH;GATA2;UQCRQ;ANKRD11;ANXA3;HIF1A;HES1;HSPA5;DNAJB1;ID1;ID2;CCDC39;ID4;APOD;RBPJ;IHH;ITGAM;ITGB1;KCNE1;RHOA;LAMB1;LRP2;ARRB2;MBP…	3.48979	8.8e-36
GOBP_CELLULAR_RESPONSE_TO_CHEMICAL_STRESS	PPIF;NET1;KLF2;RACK1;FBLN5;ARL6IP5;PRDX3;PARK7;NLRP3;NCOA7;ROMO1;CTNNB1;CYP1B1;DAPK1;DDX3X;NQO1;EDN1;EDNRA;AIF1;ENDOG;STX2;ERN1;STOX1;ALDH3B1;FOXO1;FOXO3;KDM6B;FOS;PRDX5;GATA4;GCH1;GJB2;H19;PYCARD;PYCR2;SLC25A24;ANXA1;HIF1A;APEX1;DNAJA1;HSPA1A;HSPA1B;HSPB1;IL10;JUN;RHOB;MCL1;MAP3K5;MET;MGMT;MGST1;MMP2;NFE2L2;ATP2A2;DDR2;NR4A2;P4HB;PRDX1;PAWR;CHCHD2;OSER1;PDGFRA;SERPINB6;ERRFI1;PPIA;OXR1;AXL;SELEN…	5.50586	2.59e-35
GOBP_REGULATION_OF_ACTIN_FILAMENT_BASED_PROCESS	ARPC5;ARPC3;ARPC1B;ARPC2;AKAP9;WASF2;CDC42EP3;PDPN;IQGAP2;FERMT2;DSTN;TRIOBP;CORO1A;AKAP13;SYNPO;ADD3;PLEKHH2;MTPN;CSF1R;CCN2;DSG2;DSP;EDN1;ELN;CTTN;C9orf72;EPS8;PTK2B;FLNA;COTL1;CD2AP;GATA4;ABL2;GJA5;GRB2;RGCC;PHPT1;RANGRF;PYCARD;GSN;HCK;HCLS1;ID1;IL1A;JUP;ARF1;RHOA;RHOB;RHOC;RND3;STMN1;ARHGDIB;LRP1;TACSTD2;MDK;MET;SMIM22;NEDD9;ATP2A2;PAM;F11R;SHANK1;PDE4B;LIMA1;PDGFRA;PFN1;PFN2;PIK3R1;PKP2;PLEK…	4.97216	4.49e-35
GOBP_POSITIVE_REGULATION_OF_TRANSCRIPTION_BY_RNA_POLYMERASE_II	TSTD1;ACTR2;NAMPT;ZNF267;TNIP1;KLF2;CITED2;CEBPB;CEBPD;DDX17;RUVBL2;SUB1;ADIRF;PARK7;NLRP3;OSR2;METTL23;OSR1;KLF6;NCOA7;CREB3L4;CTNNB1;DAB2;DCN;DDX3X;GLIS3;SSBP4;DLX5;JAG1;EDN1;EGR1;AHR;EGR3;EIF5A;ELF1;ELF3;ENG;ESR1;ETS2;MECOM;STOX1;TFEC;ELL2;FOXJ1;FOXO1;FOXO3;KDM6B;SF3B1;FOS;FOSB;FOSL2;MAFF;NR5A1;ZBTB38;XRCC6;SPDEF;SPAG8;GATA2;GATA4;GATA6;EHF;RBMX;GPS2;RGCC;GTF2I;SERTAD1;SLC40A1;ANXA2;HCLS1;HDGF…	2.88746	4.59e-35
GOBP_CELL_SUBSTRATE_ADHESION	ARPC2;MSLN;FBLN5;CIB1;AGR2;SORBS1;PDPN;FERMT2;TRIOBP;CORO1A;COL1A1;COL3A1;COL8A1;COL16A1;CCN2;CTNNB1;CCDC80;DAB2;JAG1;EFNA1;CTTN;PTK2B;FBLN1;FAT2;FBLN2;FLNA;FN1;MACF1;ABI3BP;GAS6;GBP1;EFEMP2;ID1;APOD;CCN1;ILK;ITGA6;ITGA3;ITGA5;ITGAM;ITGAX;ITGB1;ITGB2;ITGB4;ITGB8;JUP;RHOA;LAMA5;LAMB1;LAMB3;LIMS1;ARL2;BCAM;TACSTD2;MDK;MMP14;NEDD9;NID1;P4HB;SERPINE1;PIK3R1;PKP2;WNT4;AXL;PRKX;ADAMTS9;RAC1;RAC2;NTN4;B…	5.24389	7.46e-35
GOBP_MICROTUBULE_CYTOSKELETON_ORGANIZATION	PDCD6IP;AKAP9;SPRY1;CDK2AP2;TUBA1B;TUBB3;TUBB4B;CIB1;TACC2;CETN2;CFL1;NUDC;SDCCAG8;TUBGCP2;KIF3A;GABARAP;EFHC1;DNAAF1;CCDC78;PLK3;CRYAB;CTNNB1;CFAP206;DNAAF4;TTLL9;GADD45A;TOGARAM2;DNAH5;SPAG17;TUBB;RSPH9;PPP1R35;MAPK15;MAPRE3;FOXJ1;CLUAP1;FLNA;SYNE2;SUN1;CFAP65;SPEF1;RNF19A;GAPDH;CCDC69;TRAF3IP1;IFT172;GAS8;GJA1;CHORDC1;DNAI1;CHMP2A;TEKT2;CFAP157;CFAP47;NTMT1;CHMP4A;RANGRF;HNRNPU;HSPA1A;HSPA1B;C…	3.76837	2.28e-34
GOBP_REGULATION_OF_CYTOSKELETON_ORGANIZATION	PDCD6IP;ARPC5;ARPC3;ARPC1B;ARPC2;AKAP9;WASF2;CDK2AP2;CIB1;CDC42EP3;IQGAP2;FERMT2;DSTN;CNTRL;TRIOBP;CORO1A;AKAP13;SYNPO;ADD3;PLEKHH2;MTPN;CSF1R;CCN2;EDN1;ELN;CTTN;C9orf72;EPS8;PTK2B;PPP1R35;MAPK15;MAPRE3;FLNA;COTL1;CD2AP;SPEF1;CLIC4;TRAF3IP1;ABL2;CHMP2A;GRB2;RGCC;CHMP4A;PHPT1;RANGRF;PYCARD;GSN;HCK;HCLS1;HNRNPU;HSPA1A;HSPA1B;ID1;IL1A;ARF1;RHOA;RHOB;RHOC;RND3;STMN1;ARHGDIB;STMND1;ARL2;LRP1;TACSTD2;M…	4.17002	3.82e-34
GOBP_POSITIVE_REGULATION_OF_IMMUNE_RESPONSE	IGHV1-69D;HEXIM1;MASP2;PARK7;PHB2;NLRP3;CLU;SLC15A4;BTNL9;CD55;CFD;ELF1;A2M;EREG;FCER1G;FCN1;FGR;ZBTB1;FPR1;CADM1;FYB1;XRCC6;GATA2;GBP1;IGHV6-1;IGHV5-51;IGHV4-61;IGHV4-59;IGHV4-39;IGHV4-34;IGHV4-4;IGHV3-74;IGHV3-53;IGHV3-49;IGHV3-48;IGHV3-33;IGHV3-30;IGHV3-23;IGHV3-21;IGHV3-20;IGHV3-15;IGHV3-13;IGHV3-11;IGHV3-7;IGHV2-5;IGHV1-18;IGHV1-3;GPS2;RGCC;PHPT1;PYCARD;ANXA1;HCK;CFH;HLA-A;HLA-B;HLA-DMB;HLA-…	3.93983	5.14e-34
GOBP_VIRAL_PROCESS	PDCD6IP;TNIP1;IFITM3;LAMTOR5;SIVA1;IFITM2;HEXIM1;CFL1;LRRC15;CSF1R;CTSB;CTSL;CXADR;CD55;DDX3X;DPP4;EEF1A1;EPHA2;FCN1;CDHR3;GAS6;PABPC1;CHMP2A;SPCS1;CHMP4A;GSN;HLA-DRB1;HMGB1;PRMT1;HSPA1A;HSPA1B;HSPA8;HSP90AB1;ICAM1;IFI16;IFI27;APOE;CXCL8;INSR;ISG20;ITGA5;ITGB1;JUN;RPSA;LDLR;LGALS1;LTF;LY6E;CD46;MGAT1;MGAT2;MRC1;RNASEK;NFIA;P4HB;F11R;PCBP1;PCBP2;EIF3L;CHMP5;PLSCR1;PPIA;PPIB;PPID;RESF1;ARL8B;AXL;TM…	4.76134	9.97e-34
GOBP_AMEBOIDAL_TYPE_CELL_MIGRATION	CDH2;PDCD6;WASF2;SEMA6B;SEMA3C;CIB1;CXCL13;GIPC1;CORO1A;FSTL1;LRG1;CSNK2B;CTSH;CYP1B1;DCN;GADD45A;DPP4;AGTR2;EDN1;EDNRA;EDNRB;EFNA1;EGR3;EPHA2;ENG;PTK2B;FAT2;FGF7;FN1;FOLR1;MACF1;KANK2;GATA2;GJA1;GPC3;GLUL;CRB2;LAMTOR2;GRN;RGCC;ANXA1;HAS1;ANXA3;HIF1A;HMGB1;NR4A1;HSPB1;ID1;APOE;ILK;ITGA3;ITGB1;ITGB4;JUN;JUP;RHOA;RHOB;LAMA5;ARHGDIB;TACSTD2;MET;NFE2L2;DDR2;ATP5F1A;ATP5F1B;ENPP2;SERPINF1;PFN1;PFN2;DN…	4.33629	1.03e-33
GOBP_PROTEIN_LOCALIZATION_TO_ORGANELLE	TOMM6;DNAJB6;CDKN1A;LAMTOR5;TXNIP;MTX2;RUVBL2;EHD1;KDELR1;SEC61B;FERMT2;KDELR2;CHGA;PKIG;PARK7;PHB2;GABARAPL2;CLU;COL1A1;CPE;ROMO1;CTNNA1;DDX3X;DZIP1L;ESR1;LRWD1;MAPK15;MAPRE3;FLNA;SYNE1;SUN1;TRAM1;SEC61G;ARL2BP;CD2AP;PPP1R15A;NR5A1;SAMM50;TMEM98;GAS8;GBP1;GBP2;TIMM13;TIMM8B;INTU;GLUL;GOLGB1;SPCS1;CHMP4A;RANGRF;DNAJC15;SEC61A1;NOP53;HCLS1;HDGF;HNRNPU;DNAJA1;HSPA5;HSPA8;HSP90AA1;HSP90AB1;HSPD1;CCD…	3.20746	1.53e-33
GOBP_CELLULAR_RESPONSE_TO_NITROGEN_COMPOUND	ACTR2;NAMPT;AKAP9;KLF2;CEBPB;LAMTOR5;SORBS1;AHCYL1;RAB31;COL1A1;COL1A2;COL3A1;COL4A1;COL5A2;COL6A1;COL16A1;CTNNA1;CTNNB1;CYBA;CYBB;CYP1B1;DAXX;AGTR2;EDN1;EDNRA;EGR1;AHR;AIF1;FBN1;FOXO1;FOXO3;FLNA;PLCB1;FOLR1;FOS;GJA1;DNAI1;GJB2;GCLC;GCLM;GNA15;GNAI2;GNAS;GPD1;TRARG1;GRB2;RAPGEF1;LAMTOR2;SLC2A8;NR4A1;HNRNPAB;APEX1;HSPA5;ICAM1;ID1;IGF1;IGFBP1;IGFBP5;APRT;IL1B;INSIG1;INSR;AQP9;JUN;JUP;KCNE1;LAMTOR4;…	3.58255	1.94e-33
GOBP_LEUKOCYTE_MIGRATION	CXCL13;CHGA;CORO1A;JAML;CSF1R;CSF3R;CXADR;DDT;DPP4;DUSP1;GPR183;ECM1;EDN1;EDNRB;AIF1;EPS8;PTK2B;FCER1G;FOXJ1;PLCB1;GAS6;GCNT1;B4GALT1;ABL2;PYCARD;CXCL1;CXCL2;CXCL3;ANXA1;HCK;HMGB1;ICAM1;APOD;IL1A;IL1B;IL1R1;CXCL8;IL10;ITGA6;ITGA3;ITGB1;ITGB2;RHOA;LEP;LGALS3;MDK;CD99;MIF;MMP2;MMP14;MSN;NBL1;NEDD9;NINJ1;SERPINE1;F11R;SBDS;CKLF;PDE4B;PIK3R1;TREM1;PPIA;PPIB;LGMN;S100A14;PTN;SELENOK;RAC1;RAC2;RARRES2;…	4.86766	3.06e-33
GOBP_REGULATION_OF_CELLULAR_CATABOLIC_PROCESS	TOB1;TRIB1;STUB1;RACK1;IGF2BP2;GIPC1;HNRNPA0;KCNQ1OT1;DEPP1;PARK7;GABARAP;CIRBP;CLU;PLK3;DRAM2;CST3;ADRA2A;DAB2;DAPK1;DCN;EEF1A1;EIF4E;EIF4G2;CTTN;ENDOG;C9orf72;ERN1;PTK2B;MAPK15;FOXO1;FOXO3;TNRC6B;TUT4;RYBP;CARHSP1;HSPBP1;ATP6V1C2;FUS;RNF144B;SVIP;ARIH1;RNF19A;GAPDH;SERBP1;ZBTB20;GATA4;HSPB8;NUPR1;PABPC1;ABL2;LSM1;GCLC;GPD1;DCPS;CHMP4A;SLC25A4;PYCARD;MYLIP;SLC25A5;NOP53;ANXA2;HIF1A;HMGB1;HNRNPAB…	3.37876	3.15e-33
GOBP_CARBOHYDRATE_DERIVATIVE_BIOSYNTHETIC_PROCESS	OST4;RAMP1;TNIP1;AKR1A1;ST3GAL6;ATP5PD;ATP5MG;OGA;SLC51B;NDUFA11;CTNNB1;DAD1;SLC26A2;KRTCAP2;ENO1;ACSL1;ACSL3;ACSL4;AK9;PHLDA1;PLCB1;NUDT14;BACE2;MPC2;GALNT3;GCNT1;B4GALT1;GK;SERP1;H19;GUCY1A2;GUK1;NME7;DSE;HAS1;IGF1;APRT;IL1B;NDUFS7;CHST6;MGAT1;MGAT2;MT-ATP6;MT-ATP8;MT-CO2;MT-ND1;MT-ND2;MT-ND3;MT-ND4;MT-ND4L;MT-ND5;MT-ND6;NDUFA1;NDUFA2;NDUFA3;NDUFA5;NDUFA7;NDUFA8;NDUFAB1;NDUFB1;NDUFB2;NDUFB3;NDU…	3.67654	3.41e-33
GOBP_CATION_TRANSPORT	MRLN;COX17;PPIF;AKAP9;RAMP1;LILRB2;ATP5PD;SLC34A2;ATP5MG;AHCYL1;MAGED2;CORO1A;PARK7;PHB2;ADCYAP1R1;SLC16A10;CLIC2;SLC15A4;SLC25A29;SLC43A2;OSR1;COX4I1;COX5B;COX6A1;COX6B1;COX7B;COX8A;CP;TMEM37;CCN2;CTNNB1;ADRA2A;EFHB;ADRA2C;CTSS;CYB5A;CYBA;CNKSR3;DAPK1;EDN1;EDNRA;EDNRB;GRAMD2A;PTK2B;LRRC55;MAPK15;FKBP1A;FLNA;ARC;COMMD3;SLC44A1;ATP6V1C2;FTH1;FTL;SERINC5;GAS6;NIPSNAP2;GEM;GJA5;GNAI2;GNB2;ANK3;RANGR…	2.82719	4.25e-33
GOBP_ACTIN_FILAMENT_ORGANIZATION	ARPC5;ARPC3;ARPC1B;ACTR2;ARPC2;WASF2;SORBS1;CDC42EP3;CFL1;IQGAP2;FERMT2;DSTN;TRIOBP;CORO1A;SYNPO;ADD3;PLEKHH2;MTPN;CCN2;CTNNA1;DPYSL3;AIF1;ELN;CTTN;C9orf72;EPS8;PTK2B;PHACTR1;FLNA;COBL;COTL1;CD2AP;ANG;GRB2;RGCC;PYCARD;GSN;HCK;HCLS1;ID1;ITGB1;ARF1;CATIP;RHOA;RHOB;RHOC;RND3;STMN1;LCP1;TACSTD2;MARCKS;MET;MYO6;NEDD9;PAWR;F11R;SHANK1;LIMA1;PFN1;PFN2;PIK3R1;PLEK;PLS3;WNT4;PPP1R9A;CCDC88A;ENAH;BRK1;MICA…	4.48717	5.62e-33
GOBP_INTRACELLULAR_PROTEIN_TRANSPORT	CD24;PDCD6;TOMM6;AP1M2;ARL4C;CDKN1A;RAMP1;CIB1;TXNIP;MTX2;GIPC1;AHCYL1;EHD1;SEC61B;TMED2;ERP29;YWHAQ;IFT27;RAB31;PKIG;RABL2A;PARK7;PHB2;GABARAP;RAB3IP;AP2M1;CLU;CLTA;CLTB;SLC51B;PLK3;ROMO1;RILPL2;SPAG17;CTTN;STX2;COPZ1;SEC31A;FLNA;ARL6IP1;TRAM1;SEC61G;SVIP;SAMM50;GAS6;ARFGAP3;TIMM13;TIMM8B;SFN;TRARG1;ANK3;SPCS1;CHMP4A;RANGRF;DNAJC15;SEC61A1;HCLS1;HSPA5;HSPA8;HSPA9;HSPB1;HSP90AA1;HSP90AB1;HSPD1;IF…	3.25585	5.96e-33
GOBP_PURINE_CONTAINING_COMPOUND_BIOSYNTHETIC_PROCESS	ATP5PD;ATP5MG;NDUFA11;SLC26A2;ENO1;ACSL1;ACSL3;ACSL4;AK9;MPC2;H19;GUCY1A2;GUK1;NME7;APRT;NDUFS7;MTHFD2L;MT-ATP6;MT-ATP8;MT-CO2;MT-ND1;MT-ND2;MT-ND3;MT-ND4;MT-ND4L;MT-ND5;MT-ND6;NDUFA1;NDUFA2;NDUFA3;NDUFA5;NDUFA7;NDUFA8;NDUFAB1;NDUFB1;NDUFB2;NDUFB3;NDUFB4;NDUFB5;NDUFB6;NDUFB7;NDUFB8;NDUFB9;NDUFC1;NDUFC2;NDUFS5;NDUFS6;NDUFV2;NME1;NME2;NME3;PNP;NT5E;ATP5F1A;ATP5F1B;ATP5F1C;NDUFA13;ATP5F1D;ATP5F1E;AT…	6.49027	6.35e-33
GOBP_EPITHELIAL_TUBE_MORPHOGENESIS	SPRY1;CITED2;SPINT2;KDM5B;TMED2;PHB2;CTHRC1;DNAAF1;COL4A1;OSR1;ADM;CSF1R;CSNK2B;CTNNB1;CTSH;CTSZ;AGTR2;EDN1;EDNRA;EPHA2;ENG;ESR1;STOX1;CLUAP1;COBL;FOLR1;PLXNB2;CLIC4;IFT172;GATA4;GPC3;HIF1A;HOXB7;HES1;CCDC39;RBPJ;IHH;ILK;AR;ITGAX;AREG;RHOA;RHOB;LAMA5;LRP2;TACSTD2;MDK;MET;MMP14;MSX2;MYC;PBX1;PFN1;PGR;PODXL;WNT4;AHI1;PPP1CA;CCDC40;IFT57;LGR4;PRKX;PTCH1;CC2D2A;SHROOM3;BCL2;BRD2;RPS7;SDC4;SFRP1;SFRP2…	5.35672	6.5e-33
GOBP_ENDOCYTOSIS	WASF2;PRG4;RAMP1;IGHV1-69D;SPON2;CLEC10A;EHD1;RAB31;AP2M1;CLU;CLTA;CLTB;OCIAD2;ADM;CTSL;ADRB3;DAB2;DPP4;DPYSL2;AIF1;CTTN;C9orf72;FCER1G;FCN1;DKK1;STAB1;ARC;FOLR1;CD2AP;GATA2;ABL2;GPC3;IGHV6-1;IGHV5-51;IGHV4-61;IGHV4-59;IGHV4-39;IGHV4-34;IGHV4-4;IGHV3-74;IGHV3-53;IGHV3-49;IGHV3-48;IGHV3-33;IGHV3-30;IGHV3-23;IGHV3-21;IGHV3-20;IGHV3-15;IGHV3-13;IGHV3-11;IGHV3-7;IGHV2-5;IGHV1-18;IGHV1-3;GRB2;PYCARD;G…	3.71033	6.73e-33
GOBP_NUCLEOSIDE_PHOSPHATE_BIOSYNTHETIC_PROCESS	NAMPT;ATP5PD;ATP5MG;AK7;NDUFA11;SLC26A2;ENO1;ACSL1;ACSL3;ACSL4;AK9;QPRT;MPC2;H19;GUCY1A2;GUK1;NME7;APRT;IDO1;NDUFS7;MTHFD2L;MT-ATP6;MT-ATP8;MT-CO2;MT-ND1;MT-ND2;MT-ND3;MT-ND4;MT-ND4L;MT-ND5;MT-ND6;NDUFA1;NDUFA2;NDUFA3;NDUFA5;NDUFA7;NDUFA8;NDUFAB1;NDUFB1;NDUFB2;NDUFB3;NDUFB4;NDUFB5;NDUFB6;NDUFB7;NDUFB8;NDUFB9;NDUFC1;NDUFC2;NDUFS5;NDUFS6;NDUFV2;NME1;NME2;NME3;NNMT;PNP;ATP5F1A;RRM2B;ATP5F1B;ATP5F1C;…	5.69129	6.94e-33
GOBP_GLAND_DEVELOPMENT	CITED2;CEBPB;SEMA3C;KDM5B;PHB2;DNAAF1;CRIP1;CSF1R;CTNNB1;CYP1B1;EDN1;EDNRA;EPHA2;ELF3;ESR1;ALDH1A3;FGF7;ZBTB1;SULF1;COBL;RPGRIP1L;CADM1;NR5A1;GATA2;GATA6;ANXA1;HIF1A;HOXA10;HES1;ID2;CCDC39;ID4;IGFBP5;RBPJ;APRT;IHH;IL10;INSR;IRF6;AR;JARID2;JUN;AREG;LAMA5;MDK;MET;MGMT;MMP2;MPST;MSN;MSX1;MSX2;MT-CO2;NFIB;NFKB1;NME1;PAM;PBX1;PDGFRA;SERPINF1;PGR;WNT4;CCDC40;MAP2K1;MAP2K2;PRLR;PSAP;RTN4;PTCH1;PTN;NTN4;…	4.54011	8.37e-33
GOBP_POSITIVE_REGULATION_OF_PROTEIN_MODIFICATION_PROCESS	TANK;CD24;PDCD6;AKAP9;CDKN1A;RAMP1;STUB1;LILRB2;TNIP1;RACK1;GPNMB;CIB1;RUVBL2;ERP29;FERMT2;CHI3L1;AKAP13;PARK7;PHB2;GABARAP;CKS2;CLU;SLC51B;CLDN3;CSF1R;CSNK2B;CCN2;CTNNB1;ADRA2A;ADRA2C;NEK10;DAB2;DAXX;DDX3X;AGTR2;EDN1;EDNRB;EFNA1;EGR1;AIF1;CENPX;ENG;ERBB3;EREG;ERN1;ACSL1;PTK2B;STOX1;FGF7;FKBP1A;MAPRE3;DKK1;SF3B1;ARL2BP;HSPBP1;PPP1R15A;XRCC6;SVIP;GAS6;NUPR1;UBE2S;ANG;PPP1R42;RGCC;NOP53;HCLS1;HLA-D…	3.02813	8.85e-33
GOBP_PROTON_TRANSMEMBRANE_TRANSPORT	COX17;PPIF;ATP5PD;ATP5MG;PARK7;PHB2;SLC15A4;COX4I1;COX5B;COX6A1;COX6B1;COX7B;COX8A;CYB5A;ATP6V1C2;SLC25A4;SLC25A5;UQCR10;NDUFS7;RNASEK;MT-ATP6;MT-ATP8;MT-CO1;MT-CO2;MT-CO3;MT-CYB;MT-ND4;MT-ND5;NDUFA4;ATP1A1;ATP1B1;FXYD2;ATP5F1A;ATP5F1B;ATP5F1C;ATP5F1D;ATP6V1D;ATP5F1E;ATP5PB;ATP5MC1;ATP5MC2;ATP5MC3;ATP5ME;ATP5PF;ATP6V1A;SLC25A3;ATP6V1B2;ATP6V0C;ATP6V0B;ATP5PO;SLC47A1;SLC11A1;SLC15A1;TMSB4X;TWIST1;…	9.06395	1.05e-32
GOBP_POSITIVE_REGULATION_OF_CYTOKINE_PRODUCTION	LILRB2;SPON2;CEBPB;LAMTOR5;CHI3L1;IRAK3;PARK7;NLRP3;CLU;CSF1R;ADRA2A;CYBA;CYBB;CYP1B1;CD55;DDT;DDX3X;EGR1;AIF1;EREG;F3;FCER1G;FCN1;FGR;SULF1;PLCB1;LY96;CADM1;GAPDH;ZBTB20;CLEC4E;GATA4;GATA6;H19;RGCC;PYCARD;ANXA1;HIF1A;HLA-A;HLA-DPA1;HLA-DPB1;HLA-E;HMGB1;HMGB2;HSPA1A;HSPA1B;HSPB1;HSP90AA1;HSPD1;IRF8;IFI16;IFNGR1;IL1A;IL1B;IL1R1;IL6ST;IL10;IL18;IDO1;IRAK1;IRF1;LEP;LPL;LUM;MBP;CD46;MDK;MIF;MNDA;PNP;…	4.29406	1.3e-32
GOBP_RESPONSE_TO_STEROID_HORMONE	DDX17;TXNIP;PTGES3;PARK7;PHB2;FBXO32;COL1A1;ADM;CLDN4;CCN2;SRARP;CYBA;CYBB;CYP1B1;DAB2;DNAAF4;DAXX;DDX5;EDN1;EIF4E;AIF1;A2M;ENG;ESR1;FOXO3;FOS;FOSB;KANK2;GJB2;ANXA1;ANXA3;HMGB2;HNRNPU;DNAJA1;HSPA1A;HSPA1B;HSPA8;IGFBP2;IGFBP7;IL1RN;IL10;AR;AREG;RHOA;MBP;MDK;SCGB2A1;MT-ND3;ATP1A1;ATP2B1;ATP5F1A;PAM;SERPINF1;PER1;PGR;PLAT;ERRFI1;POR;DDIT4;PMEPA1;PTGDS;PTGER2;PTGS2;BCHE;RBBP7;CCND1;BCL2;RPL27;SCNN1A;…	5.28907	1.44e-32
GOBP_RIBOSE_PHOSPHATE_BIOSYNTHETIC_PROCESS	ATP5PD;ATP5MG;NDUFA11;SLC26A2;ENO1;ACSL1;ACSL3;ACSL4;AK9;MPC2;H19;GUCY1A2;NME7;APRT;NDUFS7;MT-ATP6;MT-ATP8;MT-CO2;MT-ND1;MT-ND2;MT-ND3;MT-ND4;MT-ND4L;MT-ND5;MT-ND6;NDUFA1;NDUFA2;NDUFA3;NDUFA5;NDUFA7;NDUFA8;NDUFAB1;NDUFB1;NDUFB2;NDUFB3;NDUFB4;NDUFB5;NDUFB6;NDUFB7;NDUFB8;NDUFB9;NDUFC1;NDUFC2;NDUFS5;NDUFS6;NDUFV2;NME1;NME2;NME3;ATP5F1A;ATP5F1B;ATP5F1C;NDUFA13;ATP5F1D;ATP5F1E;ATP5PB;ATP5MC1;PDK4;ATP5…	6.60404	1.44e-32
GOBP_POSITIVE_REGULATION_OF_PHOSPHORUS_METABOLIC_PROCESS	CD24;AKAP9;CDKN1A;LILRB2;RACK1;GPNMB;CIB1;PTGES3;ERP29;FERMT2;CHI3L1;AKAP13;PARK7;PHB2;CKS2;ADCYAP1R1;CLU;PIFO;CLDN3;CSF1R;CSNK2B;CCN2;ADRA2A;ADRA2C;NEK10;DAB2;DAXX;DDX3X;AGTR2;EDN1;EDNRB;EFNA1;EGR1;EPHA2;AIF1;ENG;ENO1;EPHB6;ERBB3;EREG;ERN1;ACSL1;ACSL3;PTK2B;STOX1;FGF7;FGR;MAPRE3;DKK1;ARL2BP;PPP1R15A;XRCC6;ZBTB20;GAS6;GPD1;ANG;PPP1R42;RGCC;HCLS1;HIF1A;HLA-DRB1;HES1;HSP90AA1;HSP90AB1;IGF1;CCN1;IL1…	3.15556	1.8e-32
GOBP_CELL_JUNCTION_ORGANIZATION	CDH2;PDCD6IP;CDH11;ACTR2;WASF2;LILRB2;SORBS1;PDLIM5;CFL1;FERMT2;SYNPO;COL4A1;COL16A1;CLDN4;CLDN3;CLDN7;FRMPD2;CSF1R;CTNNA1;CTNNB1;CTNND1;CXADR;DSG2;DSP;EFNA1;EPHA2;CTTN;TUBB;HIPK1;PTK2B;CDHR3;DKK1;EPB41L3;FLNA;ARC;FN1;MACF1;PLXNB2;CLDN15;NEGR1;ADGRF1;GJA1;GJA5;GJB2;PCDH17;ANK3;RAPGEF1;LAMTOR2;HSPA8;APOD;APOE;IL1B;IL10;IL10RA;INSR;ITGA6;ITGA3;ITGA5;ITGAM;ITGB4;JUP;ARF1;ARF4;RHOA;RHOC;LIMS1;CHCHD10…	3.53274	2.83e-32
GOBP_MICROTUBULE_BASED_TRANSPORT	IFT27;KIF3A;IFT43;DNAAF1;CFAP54;LCA5L;NEK10;DNAAF4;LCA5;DNAH5;DNAH9;DYNC1I2;SPAG17;CFAP221;CFAP53;CLUAP1;SYNE2;SUN1;CFAP45;DPCD;TRAF3IP1;IFT172;GAS8;BLOC1S1;DNAI1;INTU;IFT81;HIF1A;HNRNPU;HSBP1;HSPA8;HSPB1;CCDC39;KIF5B;ARL3;MAP1B;PCM1;DYNC2LI1;HSPB11;SPA17;CCDC40;IFT57;ARL8B;KIF27;IFT46;IFT80;RFX3;RPGR;BICD1;SFPQ;IFT22;SOD1;DST;STAU1;UBB;SPAG16;DYNC2H1;TTC21B;SPEF2;TTC26;IFT74;FUZ;CFAP43;IFT88;NME…	7.22177	3.58e-32
GOBP_REGULATION_OF_CELL_CELL_ADHESION	CD24;LILRB2;CITED2;GPNMB;CEBPB;CXCL13;PDPN;SPINT2;HSPH1;FGL2;CORO1A;NLRP3;MAP3K8;CD55;DPP4;JAG1;EGR3;AIF1;ZBTB1;FOXJ1;FOXO3;ALOX12;GCNT1;ABL2;ANK3;RGCC;PYCARD;ANXA1;HLA-A;HLA-DMA;HLA-DMB;HLA-DPA1;HLA-DPB1;HLA-DQA1;HLA-DQA2;HLA-DQB1;HLA-DRA;HLA-DRB1;HLA-DRB5;HLA-E;HMGB1;HES1;HSPD1;IGF1;IGFBP2;IHH;IL1A;IL1B;IL1RN;IL6ST;IL7R;IL10;IL18;IDO1;IRAK1;IRF1;ITGB2;ARG2;RHOA;LEP;LGALS1;LGALS3;EPCAM;MBP;CD46;…	4.23601	3.64e-32
GOBP_PROTEIN_CATABOLIC_PROCESS	PDCD6IP;TRIB1;STUB1;RACK1;LYPLA1;CLGN;OGA;CTSC;GIPC1;SEC61B;IRAK3;PARK7;GABARAP;GABARAPL2;OMA1;CLU;ANAPC16;PLK3;UBXN10;SPATA18;CST3;CTNNB1;ADRA2A;CTSB;CTSD;CTSH;CTSK;CTSL;CTSS;CTSZ;DAB2;DNAAF4;NQO1;EEF1A1;EFNA1;PTK2B;USP12;FBXO21;FOXO1;FLNA;UBXN4;TRIM2;RYBP;PRAME;CD2AP;HSPBP1;SDF2L1;CDC26;RNF144B;SVIP;ARIH1;RNF19A;TIPARP;NUPR1;GPC3;CHMP2A;GCLC;UBE2S;RNF149;CHMP4A;MYLIP;ANAPC4;NOP53;ANXA2;HMGCR;HS…	3.00828	3.72e-32
GOBP_ADAPTIVE_IMMUNE_RESPONSE_BASED_ON_SOMATIC_RECOMBINATION_OF_IMMUNE_RECEPTORS_BUILT_FROM_IMMUNOGLOBULIN_SUPERFAMILY_DOMAINS	IGHV1-69D;CXCL13;MASP2;CTSC;NLRP3;CLU;SLC15A4;CTSH;CD55;JAG1;AHR;GAPT;FCER1G;ZBTB1;FOXJ1;CADM1;TMEM98;IGHV6-1;IGHV5-51;IGHV4-61;IGHV4-59;IGHV4-39;IGHV4-34;IGHV4-4;IGHV3-74;IGHV3-53;IGHV3-49;IGHV3-48;IGHV3-33;IGHV3-30;IGHV3-23;IGHV3-21;IGHV3-20;IGHV3-15;IGHV3-13;IGHV3-11;IGHV3-7;IGHV2-5;IGHV1-18;IGHV1-3;ANXA1;HLA-A;HLA-B;HLA-DMA;HLA-DMB;HLA-DPA1;HLA-DPB1;HLA-DQA1;HLA-DQA2;HLA-DQB1;HLA-DRA;HLA-DRB1…	4.97924	4.06e-32
GOBP_NEGATIVE_REGULATION_OF_PROTEOLYSIS	DNAJB6;WFDC2;LAMTOR5;SPINT2;GIPC1;PRDX3;PARK7;GABARAPL2;CARD16;COL6A3;CRYAB;CST3;CST6;CSTA;CSTB;CTSB;CTSZ;DDX3X;ECM1;EFNA1;SERPINB1;A2M;PI16;ARL6IP1;RYBP;SVIP;TNFAIP8;PRDX5;GAPDH;TMEM98;GAS1;GAS6;GPC3;SFN;CRB2;NOP53;ANXA2;NR4A1;BIRC3;HSP90AB1;APLP2;IFI16;IL10;LRP1;LTF;ARRB2;PEBP1;SERPINE1;SERPINB2;UBXN1;SERPINA5;CRIM1;SERPINF1;SERPINA1;SERPINB6;SERPINB8;SERPINB9;PLAT;PLAUR;POR;USP47;LXN;PTGS2;RAR…	5.13326	4.67e-32
GOBP_CELLULAR_RESPONSE_TO_ORGANIC_CYCLIC_COMPOUND	ACTR2;AKAP9;KLF2;CEBPB;DDX17;ARL6IP5;PTGES3;RUVBL2;PARK7;PHB2;FBXO32;COL1A1;CTNNA1;SRARP;CTNNB1;CYBA;CYP1B1;DAB2;DNAAF4;DAXX;DDX5;EDN1;EGR1;AHR;EIF4E;AIF1;ESR1;FOXO3;FLNA;PLCB1;FOLR1;KANK2;TIPARP;GJB2;GCLC;GCLM;GNA15;GNAS;GPD1;RAPGEF1;ANXA1;HNRNPU;APEX1;DNAJA1;HSPA1A;HSPA1B;HSPA5;HSPA8;HSP90AB1;ID1;ID3;IGFBP5;IL1B;IL10;IL18;INSIG1;AQP9;AR;JUP;KCNE1;RHOA;LEP;ARRB2;SMAD5;SCGB2A1;MGMT;MMP2;MN1;MSN;M…	3.87584	4.77e-32
GOBP_EXTERNAL_ENCAPSULATING_STRUCTURE_ORGANIZATION	DNAJB6;FBLN5;PRDX4;PDPN;POSTN;SPINT2;ADAMTS5;ADAMTS6;COL1A1;COL1A2;COL3A1;COL4A1;COL4A2;COL5A1;COL5A2;COL8A1;COL10A1;COL11A1;COL12A1;COL15A1;COL16A1;COMP;CST3;CCN2;CTSK;CCDC80;CTSS;CYP1B1;AEBP1;DPP4;DPT;ELF3;ELN;ENG;FBLN1;FBLN2;SULF1;ABI3BP;GAS6;B4GALT1;RGCC;GSN;EFEMP2;ANXA2;HAS1;CCN1;IHH;ITGB1;LAMB1;LAMB3;LCP1;LRP1;LUM;MATN2;MFAP4;MMP2;MMP7;MMP11;MMP14;MYH11;NFKB2;NID1;DDR2;PDGFRA;MMP26;ADAMTS9;…	5.36464	5.47e-32
GOBP_ACTIVATION_OF_IMMUNE_RESPONSE	IGHV1-69D;HEXIM1;MASP2;PHB2;CLU;BTNL9;CD55;CFD;ELF1;A2M;FCER1G;FCN1;FGR;FPR1;FYB1;XRCC6;GBP1;IGHV6-1;IGHV5-51;IGHV4-61;IGHV4-59;IGHV4-39;IGHV4-34;IGHV4-4;IGHV3-74;IGHV3-53;IGHV3-49;IGHV3-48;IGHV3-33;IGHV3-30;IGHV3-23;IGHV3-21;IGHV3-20;IGHV3-15;IGHV3-13;IGHV3-11;IGHV3-7;IGHV2-5;IGHV1-18;IGHV1-3;GPS2;RGCC;PHPT1;PYCARD;HCK;CFH;HLA-A;HLA-DPB1;HLA-DQB1;HLA-DRB1;HMGB1;HSP90AA1;CFI;IFI16;IGHA1;IGHA2;IGH…	4.7915	6.7e-32
GOBP_TRANSMEMBRANE_TRANSPORT	MRLN;COX17;PPIF;AKAP9;ABCA10;ABCA8;ATP5PD;ARL6IP5;SLC34A2;SORBS1;ATP5MG;AHCYL1;SEC61B;CYB561D2;CORO1A;SLC2A6;PARK7;PHB2;ADCYAP1R1;SLC16A10;CLIC1;CLIC2;SLC15A4;SLC25A29;SLC51B;SLC43A2;OSCP1;OSR1;COX4I1;COX5B;EMB;COX6A1;COX6B1;COX7B;COX8A;CLDN4;TMEM37;ROMO1;TMC4;CCN2;ADRA2A;CTSS;CYB5A;CYBA;CYBB;CNKSR3;DAPK1;SLC26A2;EDN1;EDNRA;EDNRB;FABP5;ACSL1;PTK2B;LRRC55;FKBP1A;FLNA;ARL6IP1;ARC;SLC44A1;TRAM1;FOLR…	2.52976	7.51e-32
GOBP_LYMPHOCYTE_MEDIATED_IMMUNITY	IGHV1-69D;TUBB4B;MASP2;CTSC;CORO1A;NLRP3;CLU;SLC15A4;CTSH;CD55;JAG1;AHR;GAPT;TUBB;FCER1G;ZBTB1;FOXJ1;CADM1;IGHV6-1;IGHV5-51;IGHV4-61;IGHV4-59;IGHV4-39;IGHV4-34;IGHV4-4;IGHV3-74;IGHV3-53;IGHV3-49;IGHV3-48;IGHV3-33;IGHV3-30;IGHV3-23;IGHV3-21;IGHV3-20;IGHV3-15;IGHV3-13;IGHV3-11;IGHV3-7;IGHV2-5;IGHV1-18;IGHV1-3;HLA-A;HLA-B;HLA-DMA;HLA-DMB;HLA-DPA1;HLA-DPB1;HLA-DQA1;HLA-DQA2;HLA-DQB1;HLA-DRA;HLA-DRB1;…	5.00848	1.12e-31
GOBP_CELL_MORPHOGENESIS_INVOLVED_IN_DIFFERENTIATION	CDH2;CDH11;ACTR2;ARPC2;TUBB3;SEMA6B;SEMA3C;CIB1;PDLIM5;PDPN;SPINT2;CFL1;FERMT2;TRIOBP;C12orf57;COL15A1;EMB;CLDN3;CRABP2;CSF1R;CTNNB1;CUX1;DAB2;ARX;DLX5;DPYSL2;EDN1;EDNRA;EFNA1;RILPL2;EPHA2;CTTN;C9orf72;EPHB6;ALCAM;FBLN1;PHACTR1;DKK1;PALLD;FLNA;FLNB;ARC;COBL;FN1;MACF1;PLXNB2;CLIC4;GBP1;GFRA3;GOLGA4;ANK3;HES1;HSP90AA1;HSP90AB1;APLP2;ID1;IFRD1;APOE;IHH;ILK;AR;ITGB1;KIF5B;RHOA;LAMA5;LAMB1;LAMB3;LAMC2…	3.45775	1.22e-31
GOBP_LEUKOCYTE_CELL_CELL_ADHESION	CD24;LILRB2;TNIP1;GPNMB;CEBPB;HSPH1;FGL2;CORO1A;NLRP3;LRG1;MAP3K8;CD55;DPP4;EGR3;AIF1;ZBTB1;FOXJ1;FOXO3;GCNT1;ABL2;PYCARD;ANXA1;HLA-A;HLA-DMA;HLA-DMB;HLA-DPA1;HLA-DPB1;HLA-DQA1;HLA-DQA2;HLA-DQB1;HLA-DRA;HLA-DRB1;HLA-DRB5;HLA-E;HMGB1;HES1;HSPD1;ICAM1;IGF1;IGFBP2;IHH;IL1A;IL1B;IL6ST;IL7R;IL10;IL18;IDO1;IRAK1;IRF1;ITGA5;ITGB1;ITGB2;ARG2;RHOA;LEP;LGALS1;LGALS3;CD46;MDK;MSN;PNP;NT5E;OLR1;PAWR;F11R;PRK…	4.61216	1.25e-31
GOBP_OSSIFICATION	CDH11;TOB1;CEBPB;CEBPD;FERMT2;CTHRC1;OSR2;TWIST2;CLIC1;COL1A1;COL1A2;COL5A2;COL6A1;COL11A1;OSR1;COMP;VCAN;CCN2;CTNNB1;CTSK;PHOSPHO1;DDX5;SGMS2;DLX5;JAG1;SLC26A2;ECM1;EPHA2;PTK2B;FGR;DKK1;INTU;GPC3;RBMX;HIF1A;HNRNPC;HNRNPU;HSPE1;ID3;ID4;IGF1;IGFBP3;IGFBP5;CCN1;RBPJ;IHH;IL6ST;ILK;JUNB;JUND;AREG;RHOA;LEP;LTF;SMAD5;MDK;MGP;MMP2;MMP14;MN1;MSX2;ATP2B1;DDR2;ATP5F1B;PBX1;SBDS;CRIM1;PLXNB1;WNT4;ASPN;LGR4;…	4.52411	1.33e-31
GOBP_REGULATION_OF_GROWTH	RASGRP2;CDKN1A;NET1;CITED2;RACK1;BASP1;SEMA6B;SEMA3C;FBLN5;CIB1;AGR2;DNPH1;CCDC85B;DCBLD2;MTPN;CRABP2;CRYAB;CXADR;CYBA;ADRB3;DAB2;DDX3X;TLE5;ARX;DPYSL2;DUSP6;AGTR2;EDN1;EIF4G2;CTTN;ENO1;PTK2B;PI16;EPB41L3;PLCB1;WWC1;FN1;MACF1;GATA6;GJA1;GPC3;SERP1;GOLGA4;SFN;LAMTOR2;HIF1A;HSPA1A;HSPA1B;IFRD1;IGF1;APOE;IGFBP1;IGFBP3;IGFBP4;IGFBP5;IGFBP7;RBPJ;IHH;INSR;AR;JARID2;RHOA;KRT17;LEP;MAP1B;MMP14;MSX1;MT1E;…	3.69155	2.05e-31
GOBP_REGULATION_OF_INTRINSIC_APOPTOTIC_SIGNALING_PATHWAY	PPIF;RACK1;IVNS1ABP;ERP29;PARK7;PTPMT1;CLU;DDX3X;EIF5A;ENO1;NUPR1;PYCARD;HIF1A;HNRNPK;DNAJA1;HSPA1A;HSPB1;MCL1;MDM2;MIF;MSX1;MUC1;MYC;NFE2L2;P4HB;RRM2B;FIS1;NDUFA13;PLAUR;PMAIP1;IL20RA;PPIA;USP47;SELENOS;PTGS2;PTPN1;BCL2;RPL11;RPL26;RPS3;RPS7;S100A8;S100A9;BID;CXCL12;SFPQ;SFRP2;SKIL;SNAI2;SOD1;SOD2;TMBIM6;TPT1;UBB;VDAC2;XBP1;PTTG1IP;NME5;YBX3;CAV1;ARHGEF2;SLC9A3R1;EIF2AK3;CD44;HERPUD1;CD74	8.24849	2.08e-31
GOBP_VIRAL_LIFE_CYCLE	PDCD6IP;TNIP1;IFITM3;LAMTOR5;SIVA1;IFITM2;LRRC15;CTSB;CTSL;CXADR;CD55;DDX3X;DPP4;EEF1A1;EPHA2;FCN1;CDHR3;GAS6;PABPC1;CHMP2A;SPCS1;CHMP4A;GSN;HLA-DRB1;HMGB1;HSPA1A;HSPA1B;HSPA8;HSP90AB1;ICAM1;IFI16;IFI27;APOE;CXCL8;INSR;ISG20;ITGA5;ITGB1;RPSA;LDLR;LGALS1;LTF;LY6E;CD46;MRC1;RNASEK;NFIA;P4HB;F11R;PCBP1;PCBP2;CHMP5;PLSCR1;PPIA;PPIB;PPID;RESF1;ARL8B;AXL;TMPRSS4;ZC3HAV1;CHMP1B;PTX3;NECTIN2;BCL2;CCL2;CC…	5.29112	5.47e-31
GOBP_NEGATIVE_REGULATION_OF_CELLULAR_COMPONENT_ORGANIZATION	DNAJB6;PPIF;WASF2;LILRB2;PFDN6;SEMA6B;SEMA3C;CIB1;TRIOBP;CORO1A;IRAK3;PARK7;OMA1;RAB3IP;CLU;ADD3;PLEKHH2;MTPN;CLDN7;CRYAB;CST3;DAB2;DDX3X;DPP4;DPYSL3;DUSP1;EFNA1;EPS8;DKK1;FLNA;DENND5A;RPL13A;SVIP;SPEF1;TRAF3IP1;NUPR1;PRELID1;GCLC;CHMP4A;SLC25A4;DNAJC15;MYLIP;SLC25A5;SLC25A6;GSN;NOP53;ANXA2;HMGB1;HNRNPA1;HNRNPC;HNRNPU;HES1;HSPA1A;HSPA1B;HSPA5;HSPA8;DNAJB1;ID1;APOC1;APOD;IFRD1;IGF1;APOE;IK;IL1B;AR…	3.43289	5.7e-31
GOBP_UROGENITAL_SYSTEM_DEVELOPMENT	CD24;SPRY1;BASP1;IFT27;CNTRL;ADAMTS6;OSR2;COL4A1;OSR1;CRIP1;CTNNB1;CTSH;JAG1;AGTR2;EDNRA;EDNRB;EGR1;EMX2;ESR1;FBN1;FOXJ1;SULF1;RPGRIP1L;KANK2;TIPARP;TRAF3IP1;GATA2;GCNT1;GPC3;SEC61A1;ANXA1;HOXA10;HOXB7;HES1;ID3;ID4;ILK;AR;ITGA3;ARG2;RHOA;LAMA5;LIF;ARL3;LRP2;TACSTD2;EPCAM;SMAD5;MME;MMP2;MPST;MYC;NFIA;NID1;RRM2B;PBX1;PDGFRA;HSPB11;SERPINF1;PODXL;WNT4;AHI1;LGR4;PRKX;PRLR;PSAP;PTCH1;CC2D2A;ACTA2;BCL2…	4.91723	7.13e-31
GOBP_COMPLEMENT_ACTIVATION	IGHV1-69D;MASP2;PHB2;CLU;CD55;CFD;A2M;FCN1;IGHV6-1;IGHV5-51;IGHV4-61;IGHV4-59;IGHV4-39;IGHV4-34;IGHV4-4;IGHV3-74;IGHV3-53;IGHV3-49;IGHV3-48;IGHV3-33;IGHV3-30;IGHV3-23;IGHV3-21;IGHV3-20;IGHV3-15;IGHV3-13;IGHV3-11;IGHV3-7;IGHV2-5;IGHV1-18;IGHV1-3;RGCC;CFH;CFI;IGHA1;IGHA2;IGHG1;IGHG2;IGHG4;IGHM;IGKC;IL1B;CD46;MFAP4;CFP;CFB;SERPING1;C1R;C1S;C3;C4A;C4B;C4BPA;C6;C7;CD59	10.5724	7.7e-31
GOBP_RESPONSE_TO_PEPTIDE	NAMPT;KLF2;SORBS1;NUDC;AHCYL1;RAB31;TWIST2;COL1A1;COL3A1;ADM;CCN2;CTSK;CYBA;CYBB;CYP1B1;JAG1;AGTR2;EDN1;EDNRA;EDNRB;EGR1;EREG;FBN1;FOXO1;FOXO3;PLCB1;FOS;NR5A1;GCNT1;GJA1;DNAI1;GJB2;GCLC;GNAI2;TRARG1;GRB2;SLC2A8;ANXA1;NR4A1;APEX1;ICAM1;ID1;IGF1;IGFBP1;IGFBP5;APRT;IL1B;IL10;INSIG1;INSR;JUND;AREG;LEP;LPL;LRP1;MAP1B;MDM2;MMP2;NCL;NFE2L2;NFKB1;NFKBIA;ATP2B1;DDR2;NR4A2;CHMP5;PDK4;SERPINF1;PIK3R1;PKM;PL…	4.03328	8.21e-31
GOBP_POSITIVE_REGULATION_OF_PROTEOLYSIS	TANK;PDCD6;TRIB1;STUB1;TNIP1;RACK1;SPON1;ARL6IP5;CTSC;GABARAP;NLRP3;CLU;PLK3;CLDN4;CLDN3;CCN2;ADRA2A;CTSD;CTSH;DAB2;DAPK1;DDX3X;EFNA1;ENO1;F3;PTK2B;FBLN1;FN1;HSPBP1;MTCH1;RNF144B;ARIH1;RNF19A;FAM162A;NUPR1;BEX3;PRELID1;GCLC;GRN;PYCARD;GSN;NOP53;ANXA2;HMGB1;HSPA1A;HSPA1B;HSPD1;HSPE1;IFI16;APOE;CCN1;IL1B;RHOA;MBP;MDM2;MAP3K5;MMP14;MYC;NFE2L2;FIS1;RPS27L;NDUFA13;PCOLCE;PMAIP1;CYCS;AURKAIP1;UACA;IFT5…	4.78389	1.07e-30
GOBP_T_CELL_ACTIVATION	CD24;LILRB2;GPNMB;CEBPB;HSPH1;FGL2;KDELR1;CORO1A;NLRP3;JAML;MAP3K8;CTNNB1;CTSL;CXADR;CD55;DPP4;GPR183;EGR1;EGR3;AIF1;FCER1G;FKBP1A;ZBTB1;FOXJ1;FOXO3;CADM1;TMEM98;CLEC4E;ABL2;PRELID1;PYCARD;GSN;ANXA1;HLA-A;HLA-DMA;HLA-DMB;HLA-DPA1;HLA-DPB1;HLA-DQA1;HLA-DQA2;HLA-DQB1;HLA-DRA;HLA-DRB1;HLA-DRB5;HLA-E;HMGB1;HES1;HSPD1;ICAM1;IGF1;IGFBP2;IHH;IL1A;IL1B;IL6ST;IL7R;IL10;IL18;IDO1;IRF1;JUNB;ARG2;RHOA;LCP1;L…	3.88537	1.59e-30
GOBP_RESPONSE_TO_TOXIC_SUBSTANCE	AKR1A1;FBLN5;PRDX4;KDM5B;PRDX3;INMT;PARK7;CLIC2;OSCP1;ADH5;CYP1B1;NQO1;AHR;EPHX1;ESD;ALDH1A1;FOS;ALOX5AP;PRDX5;GATA6;GCH1;NUPR1;H19;GPX3;GPX4;GSTM3;GSTP1;HBA1;HBA2;HBB;HP;APOE;GSTK1;MAP1B;MBP;MGMT;MGST1;MGST2;MGST3;MPST;MT1E;MT1F;MT1G;MT1H;MT1M;MT1X;MT2A;NFE2L2;PRDX1;PIM1;SLC47A1;SELENOS;PTGS2;BCL2;S100A9;CCL3;CCL4;CCL5;SELENOW;SLC18A2;SLC22A5;SOD1;SOD2;SOD3;PRDX2;TLR2;TNF;TXN;SLC30A1;PXDN;PRXL2A…	6.13678	1.63e-30
GOBP_EMBRYO_DEVELOPMENT_ENDING_IN_BIRTH_OR_EGG_HATCHING	PDCD6;DNAJB6;KLF2;CITED2;EMG1;N4BP2L2;CEBPB;SEMA3C;SLC34A2;SPINT2;TMED2;CTHRC1;OSR2;COL1A1;COL3A1;COL11A1;OSR1;ADM;CCDC24;CTNNB1;DAD1;DSC3;EDN1;EDNRA;EPHA2;DZIP1L;ELF3;SMIM14;ENDOG;ACSL4;DKK1;CLUAP1;SULF1;COBL;ATP11A;RPGRIP1L;FOLR1;PLXNB2;MAFF;CBY1;SYF2;IFT172;PHGDH;GATA2;GATA6;B9D1;INTU;CRB2;GRB2;HIF1A;HOXB5;HOXB6;HOXB7;PRMT1;HES1;IGF1;CCN1;RBPJ;IHH;IL10;AR;ITGB1;JUNB;KRT19;LIF;LRP2;TM4SF1;MARCK…	3.48915	2.15e-30
GOBP_RESPONSE_TO_MOLECULE_OF_BACTERIAL_ORIGIN	CD24;TRIB1;LILRB2;TNIP1;SPON2;CEBPB;CXCL13;PRDX3;HNRNPA0;IRAK3;NLRP3;CARD16;ADH5;ADM;CD55;DIO2;EDN1;EDNRB;FOS;LY96;GCH1;GJB2;PDCD4;PYCARD;CXCL1;CXCL2;CXCL3;GSTP1;HCK;HMGB1;HMGB2;NR4A1;IRF8;IL1A;IL1B;CXCL8;IL10;IL10RA;IL18;IDO1;IRAK1;IRAK2;JUND;RHOA;LTF;MIF;MRC1;NFKB1;NFKBIA;SERPINE1;PDE4B;CHMP5;AXL;SELENOS;MAP2K3;B2M;PLSCR4;PELI1;PTGER2;S100A14;PTGS2;S100A8;S100A9;CCL2;CCL3;CCL5;SLC11A1;SLPI;SOD2…	4.86492	2.76e-30
GOBP_CILIUM_MOVEMENT	CFAP70;DNAAF1;CFAP54;CFAP52;TEKT4;NEK10;CFAP206;DNAAF4;TTLL9;DEFB1;DNAH5;DNAH9;SPAG17;CFAP221;ENKUR;CFAP53;RSPH9;CFAP65;CATSPERD;CFAP45;SPEF1;DPCD;GAS8;DNAI1;TEKT2;TSSK4;CFAP157;CFAP47;IFT81;DNAJA1;CCDC39;RSPH4A;CFAP100;CFAP73;ZMYND10;SPA17;PLTP;LZTFL1;HYDIN;CFAP46;CCDC40;MNS1;KIF27;CFAP44;DNAH7;CFAP298;RFX3;KIF9;DNAI2;SORD;TMF1;UBE2B;SPAG16;ZBBX;CFAP69;SPEF2;CFAP43;SLIRP;TEKT1;NME5;ROPN1L;TTC29;…	7.25803	3.19e-30
GOBP_LOCALIZATION_WITHIN_MEMBRANE	CDH2;CD24;TOMM6;ARL4C;RAMP1;RACK1;LYPLA1;CIB1;ARL6IP5;AGR2;SORBS1;MYL12A;MTX2;VAMP5;EHD1;SEC61B;TMED2;FERMT2;RAB31;RAB3IP;AP2M1;SLC51B;LRRC15;CPE;ROMO1;DAB2;RILPL2;EPHA2;ACSL3;EPB41L3;FLNA;ARL6IP1;TRAM1;SEC61G;MACF1;TSPAN15;FYB1;SAMM50;GAS6;GBP1;TIMM13;TIMM8B;GPC3;GOLGA4;TRARG1;ANK3;CHMP4A;RANGRF;GSN;SEC61A1;HSPA5;HSP90AA1;APOE;AR;ITGA3;ITGAM;ITGB1;ITGB2;JUP;KCNE1;KIF5B;KRT18;LAMA5;LGALS3;LMNA;TO…	3.47613	4.67e-30
GOBP_REGULATION_OF_SUPRAMOLECULAR_FIBER_ORGANIZATION	ARPC5;ARPC3;ARPC1B;ARPC2;AKAP9;WASF2;PFDN6;CIB1;CDC42EP3;FERMT2;DSTN;TRIOBP;CORO1A;AKAP13;PARK7;SYNPO;CLU;ADD3;PLEKHH2;MTPN;CRYAB;CCN2;AEBP1;EDN1;ELN;CTTN;C9orf72;EPS8;PTK2B;MAPRE3;FLNA;COTL1;SPEF1;GRB2;RGCC;RANGRF;PYCARD;GSN;EFEMP2;HCK;HCLS1;HSPA1A;HSPA1B;HSPA8;ID1;APOE;ARF1;RHOA;RHOC;STMN1;LDLR;ARL2;TACSTD2;MAP1B;MET;F11R;SHANK1;LIMA1;PFDN5;PFN1;PFN2;PIK3R1;PLEK;WNT4;CCDC88A;BRK1;TWF1;SLAIN2;RA…	4.64822	6.78e-30
GOBP_NEGATIVE_REGULATION_OF_HYDROLASE_ACTIVITY	DNAJB6;SPRY1;WFDC2;LAMTOR5;SPINT2;PRDX3;TMED2;PARK7;CARD16;COL6A3;CRYAB;PPP1R36;CST3;CST6;CSTA;CSTB;CTSB;DDX3X;ECM1;SERPINB1;A2M;PI16;PPP1R35;FKBP1A;ARL6IP1;PPP1R15A;TNFAIP8;PRDX5;GAPDH;GAS6;GCHFR;GPC3;GNAI2;SFN;CRB2;ANXA1;ANXA2;NR4A1;BIRC3;APLP2;APOC1;IFI16;LEPR;LGALS3;ARL2;LRP1;LTF;ARRB2;PEBP1;SERPINE1;SERPINB2;F11R;UBXN1;SERPINA5;CRIM1;SERPINF1;SERPINA1;SERPINB6;SERPINB8;SERPINB9;PLAUR;PLXNB3;…	4.73595	7.64e-30
GOBP_SECRETION	PDCD6IP;AP1M2;FBLN5;AGR2;GIPC1;KDM5B;ERP29;RAB31;CHGA;CORO1A;PARK7;RAB3IP;SLC16A10;SLC51B;COMP;ADM;CPE;SELENOM;CCN2;ADRA2A;ADRA2C;CYBA;DAB2;EDN1;EDNRB;ENG;STX2;ERBB3;ACSL3;ACSL4;FGF7;FGR;FOXO1;CD2AP;MPC2;PNKD;GATA2;ARFGAP3;GJA1;SERP1;CHMP2A;GLUL;GNAI2;ANG;CAVIN1;TRARG1;RGCC;ANXA1;ANXA2;HCK;ANXA3;HIF1A;HLA-DRB1;HMGCR;NR4A1;ICA1;IGF1;APOE;APRT;IL1A;IL1B;IL1RN;AQP9;ITGAM;ITGB2;ARL4D;LEP;LIF;LLGL2;LT…	2.96874	1.15e-29
GOBP_REGULATION_OF_PROTEIN_KINASE_ACTIVITY	CD24;HIPK3;TRIB1;SPRY1;CDKN1A;CDKN1C;CCNO;RACK1;CIB1;HEXIM1;ERP29;FERMT2;CCNI;PKIG;CHI3L1;IRAK3;AKAP13;PARK7;PHB2;CKS2;CLU;CSF1R;ADRA2A;ADRA2C;NEK10;DAB2;DAXX;GADD45A;DDX3X;DUSP1;EDN1;EFNA1;EGR1;ERBB3;EREG;ERN1;ACSL1;PTK2B;STOX1;FGR;MAPRE3;DKK1;XRCC6;GAS6;CHORDC1;PDCD4;SFN;ANG;RGCC;PYCARD;GSTP1;SERTAD1;HMGCR;DNAJA1;HSPB1;HSP90AA1;HSP90AB1;IGF1;APOE;CCN1;IL1B;IL18;INSR;IRAK1;AREG;RHOA;LCP2;LEP;LTF…	3.45648	1.19e-29
GOBP_NEGATIVE_REGULATION_OF_APOPTOTIC_SIGNALING_PATHWAY	PPIF;IVNS1ABP;PARK7;CLU;CTNNA1;CTNNB1;DDX3X;CTTN;ENO1;EYA2;GATA4;PRELID1;GCLC;GCLM;GNAI2;SLC25A4;SLC25A5;SLC25A6;GSTP1;HIF1A;HMGB2;DNAJA1;HSPA1A;HSPA1B;HSPB1;ICAM1;IGF1;IL1A;IL1B;ITGA6;AR;LGALS3;LMNA;ARRB2;MAZ;MCL1;MDM2;MIF;MUC1;NFE2L2;NR4A2;RRM2B;SERPINE1;NDUFA13;PLAUR;WNT4;PPIA;USP47;FAIM;SELENOS;PTGS2;PTPN1;BCL2;BID;CXCL12;SFRP2;SNAI2;SOD2;PRDX2;TMBIM6;THBS1;TNF;TNFAIP3;TPT1;VDAC2;XBP1;PTTG1IP…	6.29888	1.25e-29
GOBP_IMMUNE_RESPONSE_REGULATING_SIGNALING_PATHWAY	CD24;IGHV1-69D;LILRB2;TNIP1;IRAK3;PHB2;NLRP3;SLC15A4;CTSH;CTSS;CYBA;BTNL9;DDX3X;ELF1;ESR1;FCER1G;FCN1;FGR;FPR1;LY96;FYB1;CLEC4E;GBP1;IGHV6-1;IGHV5-51;IGHV4-61;IGHV4-59;IGHV4-39;IGHV4-34;IGHV4-4;IGHV3-74;IGHV3-53;IGHV3-49;IGHV3-48;IGHV3-33;IGHV3-30;IGHV3-23;IGHV3-21;IGHV3-20;IGHV3-15;IGHV3-13;IGHV3-11;IGHV3-7;IGHV2-5;IGHV1-18;IGHV1-3;GPS2;PHPT1;PYCARD;NOP53;HCK;HLA-A;HLA-DPB1;HLA-DQB1;HLA-DRB1;HMG…	4.00512	1.25e-29
GOBP_DEVELOPMENTAL_GROWTH	SPRY1;CDKN1A;KLF2;CITED2;CPQ;BASP1;SEMA6B;SEMA3C;AGR2;PDLIM5;KDM5B;TMED2;AKAP13;COL3A1;COMP;ADM;MTPN;CRABP2;SELENOM;CTNNB1;CXADR;ADRB3;ARX;DPYSL2;DUSP6;ECM1;EDN1;EDNRA;CTTN;C9orf72;EREG;ESR1;ALCAM;PI16;FGF7;FOXO3;PLCB1;COBL;WWC1;FN1;MACF1;CLIC4;GAS1;GATA4;GATA6;SERP1;GNAS;GOLGA4;ANXA1;HSP90AA1;HSP90AB1;APOD;IFRD1;IGF1;APOE;IGFBP1;RBPJ;IHH;INSR;AR;ITGB1;JARID2;AREG;LEP;LEPR;MAP1B;MDK;MSX2;NINJ1;DD…	3.50373	1.54e-29
GOBP_RESPONSE_TO_REACTIVE_OXYGEN_SPECIES	PPIF;NET1;KLF2;RACK1;FBLN5;TXNIP;PRDX3;PARK7;PLK3;COL1A1;ROMO1;CRYAB;CYP1B1;NQO1;EDN1;ENDOG;ERN1;PTK2B;FOXO3;KDM6B;FOS;PRDX5;GCH1;H19;GSTP1;ANXA1;HBA1;HBA2;HBB;HIF1A;HP;APEX1;APOD;APOE;IL1A;IL10;JUN;AREG;RHOB;MAP3K5;MET;MMP2;MT-ND5;MT-ND6;NFE2L2;DDR2;PRDX1;PAWR;OSER1;PDGFRA;AXL;PLEKHA1;BCL2;RPS3;SOD1;SOD2;SOD3;PRDX2;TNFAIP3;TPM1;TXN;UCP2;NR4A3;CAPN2;MAP1LC3A;CAT;PPP1R15B;AKR1C3;SPHK1;CD36	6.87308	1.55e-29
GOBP_ORGANOPHOSPHATE_BIOSYNTHETIC_PROCESS	NAMPT;AKR1A1;ABCA8;CDS1;ATP5PD;ATP5MG;PLAAT3;PTPMT1;CKB;ADCYAP1R1;AK7;NDUFA11;DGKH;SGMS2;SLC26A2;ENO1;FABP5;ACSL1;ACSL3;ACSL4;PTK2B;AK9;FDPS;SLC44A1;QPRT;SERINC5;MPC2;GCH1;SH3YL1;GK;H19;GUCY1A2;GUK1;NME7;HMGCS1;APRT;IMPA2;IDO1;NDUFS7;MTHFD2L;MT-ATP6;MT-ATP8;MT-CO2;MT-ND1;MT-ND2;MT-ND3;MT-ND4;MT-ND4L;MT-ND5;MT-ND6;NDUFA1;NDUFA2;NDUFA3;NDUFA5;NDUFA7;NDUFA8;NDUFAB1;NDUFB1;NDUFB2;NDUFB3;NDUFB4;NDUFB5…	3.62506	1.71e-29
GOBP_B_CELL_MEDIATED_IMMUNITY	IGHV1-69D;MASP2;CLU;SLC15A4;CD55;GAPT;FCER1G;FOXJ1;IGHV6-1;IGHV5-51;IGHV4-61;IGHV4-59;IGHV4-39;IGHV4-34;IGHV4-4;IGHV3-74;IGHV3-53;IGHV3-49;IGHV3-48;IGHV3-33;IGHV3-30;IGHV3-23;IGHV3-21;IGHV3-20;IGHV3-15;IGHV3-13;IGHV3-11;IGHV3-7;IGHV2-5;IGHV1-18;IGHV1-3;HLA-DMA;HLA-DMB;HLA-DPA1;HLA-DPB1;HLA-DQA1;HLA-DQA2;HLA-DQB1;HLA-DRA;HLA-DRB1;HLA-DRB5;HLA-E;HSPD1;CFI;IGHA1;IGHA2;IGHG1;IGHG2;IGHG4;IGHM;IGKC;IL1…	6.72368	1.75e-29
GOBP_POSITIVE_REGULATION_OF_HYDROLASE_ACTIVITY	TANK;PDCD6;RASGRP2;NET1;RACK1;ARL6IP5;CXCL13;FERMT2;PHB2;NLRP3;ADCYAP1R1;CLDN4;CLDN3;CCN2;CTSD;CTSH;RASGEF1B;DAPK1;DDX3X;AGTR2;EDNRA;EFNA1;EPHA2;C9orf72;ESR1;F3;PTK2B;FBLN1;FOXJ1;FN1;PPP1R15A;MTCH1;FAM162A;ABL2;BEX3;PRELID1;GNA15;ANG;RAPGEF1;GRN;PYCARD;GSN;TAX1BP3;HMGB1;HMGB2;HSPA1A;HSP90AB1;HSPD1;HSPE1;IFI16;CCN1;ITGA6;ITGB1;ARF4;RHOA;RHOC;LIMS1;ARL1;MBP;MAP3K5;AFDN;MYC;NEDD9;F11R;FIS1;RPS27L;ND…	3.66749	1.82e-29
GOBP_TAXIS	TUBB3;GPNMB;SEMA6B;SEMA3C;CXCL13;CHGA;CORO1A;JAML;EMB;CSF1R;CSF3R;CXADR;DDT;DEFB1;ARX;DLX5;DPP4;DPYSL2;DUSP1;GPR183;EDN1;EDNRA;EDNRB;EFNA1;EGR3;EPHA2;AIF1;EPHB6;ALCAM;F3;PTK2B;FCER1G;FGF7;PALLD;FPR1;PLXNB2;GAS6;GFRA3;CXCL1;CXCL2;CXCL3;ANXA1;HMGB1;HMGB2;NR4A1;HSPB1;CCN1;IL1B;CXCL8;IL10;ITGB2;KIF5B;RHOA;LAMA5;LAMC2;LGALS3;LSP1;ARRB2;MDK;MET;MIF;MMP2;NBL1;NEDD9;NFIB;NINJ1;SERPINE1;SBDS;CKLF;PDE4B;PD…	3.57745	1.87e-29
GOBP_CELLULAR_RESPONSE_TO_OXIDATIVE_STRESS	PPIF;NET1;KLF2;RACK1;FBLN5;ARL6IP5;PRDX3;PARK7;NCOA7;ROMO1;CTNNB1;CYP1B1;DAPK1;NQO1;EDN1;EDNRA;AIF1;ENDOG;STX2;ERN1;ALDH3B1;FOXO1;FOXO3;KDM6B;FOS;PRDX5;GATA4;GCH1;GJB2;H19;PYCR2;SLC25A24;ANXA1;HIF1A;APEX1;HSPA1A;HSPA1B;HSPB1;IL10;JUN;RHOB;MCL1;MAP3K5;MET;MGMT;MGST1;MMP2;NFE2L2;ATP2A2;DDR2;NR4A2;P4HB;PRDX1;PAWR;CHCHD2;OSER1;PDGFRA;PPIA;OXR1;AXL;SELENOS;PLEKHA1;BCL2;GAS5;RPS3;SFPQ;SLC1A1;SOD1;SOD2;…	5.44719	1.89e-29
GOBP_NEGATIVE_REGULATION_OF_INTRACELLULAR_SIGNAL_TRANSDUCTION	TANK;PDCD6;PPIF;HIPK3;SPRY1;TNIP1;RACK1;CIB1;IVNS1ABP;IRAK3;CAVIN3;PARK7;NLRP3;CLU;CNKSR3;DAB2;DDX3X;RCAN1;DUSP1;DUSP2;DUSP6;EFNA1;EPHA2;ENDOG;ENO1;ESR1;MECOM;FBLN1;FOXO1;WWC1;CD2AP;GBP1;ABL2;PDCD4;RNF149;GPS2;PYCARD;GSTP1;NOP53;HIF1A;HMGCR;PRMT1;DNAJA1;HSPA1A;HSPB1;APOE;IL1B;ITGA3;ITGB1;RHOA;STMN1;LIF;ARRB2;MCL1;MDM2;MET;MIF;MUC1;MYC;ATF3;NDUFC2;NFE2L2;PEBP1;RRM2B;NDUFA13;TAOK3;PER1;PLAUR;PLEK;E…	3.76595	4.83e-29
GOBP_POSITIVE_REGULATION_OF_PHOSPHORYLATION	CD24;AKAP9;CDKN1A;RACK1;GPNMB;CIB1;PTGES3;ERP29;FERMT2;CHI3L1;AKAP13;PARK7;PHB2;CKS2;CLU;PIFO;CLDN3;CSF1R;CSNK2B;CCN2;ADRA2A;ADRA2C;NEK10;DAB2;DAXX;DDX3X;EDN1;EDNRB;EFNA1;EGR1;EPHA2;AIF1;ENG;EPHB6;ERBB3;EREG;ERN1;ACSL1;PTK2B;STOX1;FGF7;FGR;MAPRE3;DKK1;ARL2BP;XRCC6;ZBTB20;GAS6;GPD1;ANG;RGCC;HCLS1;HIF1A;HLA-DRB1;HES1;HSP90AA1;HSP90AB1;IGF1;CCN1;IL1B;IL6ST;IL18;ILK;INSR;IRAK1;ITGA6;AR;ITGA5;AREG;RHO…	3.11551	5.01e-29
GOBP_PEPTIDYL_AMINO_ACID_MODIFICATION	OST4;CD24;PPIF;HIPK3;AKAP9;RACK1;PRDX4;RUVBL2;MORF4L1;PRDX3;CHI3L1;PARK7;CLK1;CLNS1A;METTL23;ADH5;NCOA7;CSF1R;CSNK2B;CTNNB1;ADRA2A;CNKSR3;DAD1;DCN;TTLL9;GADD45A;EFNA1;EGR1;EPHA2;KRTCAP2;HIPK1;EPHB6;ERBB3;EREG;ERN1;PTK2B;STOX1;EFEMP1;FGF7;FGR;FKBP1A;FKBP2;FKBP5;DKK1;SF3B1;ARL2BP;EID1;ASPHD1;TTLL10;NUDT14;GALNT3;GAPDH;GAS6;GATA2;BLOC1S1;GCSH;ABL2;TSSK4;PPIL6;NTMT1;HCK;HCLS1;HINT1;PRMT1;HES1;HSP90AA…	2.61205	6.35e-29
GOBP_REGULATION_OF_CELL_DEVELOPMENT	ACTR2;ARPC2;TRIB1;SEMA6B;SEMA3C;CIB1;FERMT2;TRIOBP;CRABP2;CTNNA1;CTNNB1;CUX1;DAB2;EDNRB;FBLN1;FBN1;FLNA;PLCB1;FN1;MACF1;PLXNB2;TMEM98;GBP1;GOLGA4;GRN;ANXA2;HIF1A;HMGB2;HES1;ID1;ID2;ID4;IFRD1;IGF1;IL1A;IL1B;IL6ST;ILK;ITGB1;LDLR;LIF;LIMS1;LRP2;LTF;TACSTD2;CAPRIN1;MAP1B;MBP;MDK;MME;NAP1L1;NEDD9;P4HB;PAEP;F11R;PCM1;SERPINF1;PLXNB1;PLXNB3;FAIM;HES6;MAP2K1;MAP2K2;RELN;B2M;SEMA3G;RTN4;PTN;SHTN1;PTPRS;RA…	3.87733	7.54e-29
GOBP_SKELETAL_SYSTEM_DEVELOPMENT	CDH11;WASF2;CITED2;CHI3L1;AKAP13;OSR2;COL1A1;COL1A2;COL3A1;COL5A2;COL10A1;COL11A1;OSR1;COMP;VCAN;CCN2;CTNNB1;CTSK;PHOSPHO1;TLE5;DLX5;ECM1;EDN1;EDNRA;EPHA2;ENG;ETS2;FBN1;EFEMP1;FGR;FLNA;SULF1;TIPARP;IFT172;GJA1;SERP1;GNAS;ANKRD11;ANXA2;HIF1A;HOXA10;HOXB5;HOXB6;HOXB7;IGF1;CCN1;IHH;INSIG1;ITGB8;RHOA;LEP;LEPR;LTF;SMAD5;MAF;MDK;MGP;MMP2;MMP14;MSX1;MSX2;NFIB;DDR2;OGN;PRDX1;PBX1;SBDS;PDGFRA;HSPB11;PLS3;…	3.79025	8.33e-29
GOBP_MUSCLE_SYSTEM_PROCESS	AKAP9;MYL9;PDLIM5;CHGA;AKAP13;C12orf57;FBXO32;CLIC2;CCDC78;CNN1;COMP;MTPN;MYL6B;CRYAB;CCN2;ADRA2A;ADRA2C;CYBA;DES;DSG2;DSP;EDN1;EDNRA;EDNRB;AIF1;CTTN;ENO1;PI16;FOXO1;FOXO3;FLNA;SULF1;GATA4;GATA6;MYOF;GJA1;GJA5;RANGRF;GSN;LMCD1;NR4A1;HSBP1;HSP90AA1;IGF1;IGFBP5;IL1B;IL6ST;JARID2;JUP;KCNE1;ARG2;RHOA;LEP;LMNA;SMAD5;MYH2;MYH11;MYL6;ATP1A1;ATP1B1;ATP2A2;ATP2B1;PDE4B;PKP2;FXYD1;ERRFI1;MAP2K3;MAP2K6;PTGE…	4.1285	1.31e-28
GOBP_CELL_CHEMOTAXIS	CXCL13;CHGA;CORO1A;JAML;CSF1R;CSF3R;CXADR;DDT;DPP4;DUSP1;GPR183;EDN1;EDNRB;EGR3;EPHA2;AIF1;PTK2B;FCER1G;GAS6;CXCL1;CXCL2;CXCL3;ANXA1;HMGB1;HMGB2;NR4A1;HSPB1;IL1B;CXCL8;IL10;ITGB2;LGALS3;ARRB2;MDK;MET;MIF;MMP2;NBL1;NEDD9;NINJ1;SERPINE1;SBDS;CKLF;PDE4B;PDGFRA;PLXNB3;TREM1;PPIA;PPIB;LGMN;S100A14;PTN;RAB13;RAC1;RAC2;RARRES2;RPS19;S100A8;S100A9;S100A12;SAA1;CCL2;CCL3;CCL3L1;CCL4;CCL5;CCL20;CCL21;CXCL1…	5.00905	2.37e-28
GOBP_NEGATIVE_REGULATION_OF_CELL_DIFFERENTIATION	TOB1;TRIB1;SPRY1;N4BP2L2;SEMA6B;SEMA3C;CIB1;FGL2;FERMT2;CCDC85B;VASN;TWIST2;COL5A1;COL5A2;OSR1;CTNNA1;CTNNB1;TCF23;JAG1;EDNRB;EFNA1;EIF4E;EREG;PTK2B;FBLN1;FBN1;EFEMP1;PI16;DKK1;FOXJ1;FOXO1;FOXO3;PRAME;SPDEF;TMEM98;GATA2;GBP1;PDCD4;LSM1;GPS2;TMEM176B;ANXA1;HMGB1;HNRNPU;PRMT1;HES1;HSPA9;ID1;ID2;ID3;ID4;IFRD1;IGF1;IGFBP5;RBPJ;IHH;IL1A;IL1B;IL18;INSIG1;IRF1;ITGB1;AREG;RHOA;LDLR;LTF;TACSTD2;MBP;MDK;ME…	3.262	6.15e-28
GOBP_REACTIVE_OXYGEN_SPECIES_METABOLIC_PROCESS	CDKN1A;FBLN5;PRDX4;PRDX3;PARK7;ROMO1;CRYAB;CCN2;CYBA;CYBB;CYP1B1;GADD45A;NQO1;EDN1;PTK2B;FOXO1;FOXO3;ALOX12;PRDX5;GCH1;GNAI2;H19;GPX3;GRB2;GSTP1;HBA1;HBA2;HBB;HIF1A;HP;CCN1;ITGAM;ITGB2;ARF4;ARG2;RHOA;LEP;MT-CO2;MT-ND2;NCF2;NDUFC2;NFE2L2;PRDX1;NDUFA13;PDK4;PMAIP1;DDIT4;RAC1;RAC2;BCL2;CLEC7A;SLC1A1;SLC5A3;SLC18A2;SOD1;SOD2;SOD3;PRDX2;TGFB1;THBS1;TSPO;TNF;TYROBP;VDAC1;PXDN;BCO2;CAT;AKR1C3;CFLAR;ATP5…	6.01311	6.54e-28
GOBP_NEGATIVE_REGULATION_OF_PEPTIDASE_ACTIVITY	DNAJB6;WFDC2;LAMTOR5;SPINT2;PRDX3;PARK7;CARD16;COL6A3;CRYAB;CST3;CST6;CSTA;CSTB;CTSB;DDX3X;ECM1;SERPINB1;A2M;PI16;ARL6IP1;TNFAIP8;PRDX5;GAPDH;GAS6;GPC3;SFN;CRB2;ANXA2;NR4A1;BIRC3;APLP2;IFI16;LRP1;LTF;ARRB2;PEBP1;SERPINE1;SERPINB2;UBXN1;SERPINA5;CRIM1;SERPINF1;SERPINA1;SERPINB6;SERPINB8;SERPINB9;PLAUR;POR;USP47;LXN;PTGS2;RARRES1;ROCK1;SFRP2;ANXA8;SLPI;SORL1;SPINT1;BST2;TFPI;THBS1;TIMP1;TIMP2;TIMP3…	5.5835	1.06e-27
GOBP_CIRCULATORY_SYSTEM_PROCESS	AKAP9;KLF2;CELF2;FERMT2;CHGA;AKAP13;CLIC2;COL1A2;ADH5;COMP;ADM;C2CD4A;CCN2;ADRA2A;ADRA2C;CTSZ;CXADR;CYBA;ADRB3;DES;DSG2;DSP;AGTR2;EDN1;EDNRA;EDNRB;ELN;LVRN;FABP5;FLNA;SLC44A1;DDAH1;GAS6;GATA4;GATA6;GCH1;MYOF;GJA1;GJA5;GCLC;GCLM;GNAI2;RANGRF;GSN;HBB;HSP90AA1;ID2;APOE;INSR;AR;JUP;KCNE1;RHOA;C2CD4B;LEP;LEPR;LRP1;LRP2;SMAD5;MDM2;MMP2;ATP1A1;ATP1B1;ATP2A2;ATP2B1;OLR1;PDE4B;PKP2;FXYD1;SLC38A2;MAP2K3;MA…	3.50004	1.09e-27
GOBP_POSITIVE_REGULATION_OF_RESPONSE_TO_EXTERNAL_STIMULUS	TNIP1;CEBPB;CXCL13;HEXIM1;CTSC;PARK7;NLRP3;SLC15A4;CSF1R;C2CD4A;CYBA;DDT;EDN1;AIF1;EREG;F3;PTK2B;FCN1;FLNA;LY96;CADM1;ALOX5AP;XRCC6;GAS6;NUPR1;PDCD4;NEAT1;GRN;PYCARD;HCK;HLA-E;HMGB1;HMGB2;HSPB1;HSP90AA1;IFI16;IL1B;IL6ST;CXCL8;IL18;IDO1;C2CD4B;LDLR;LGALS1;LGALS2;LPL;MDK;MET;MGST2;MIF;MNDA;NEDD9;NFKBIA;NINJ1;OSM;SERPINE1;PLA2G2A;PLA2G5;PLAT;PLSCR1;LGMN;PTGER3;S100A14;PTGS2;PTN;NECTIN2;RAC1;RAC2;RAR…	4.00032	1.11e-27
GOBP_EXTRINSIC_APOPTOTIC_SIGNALING_PATHWAY	CIB1;SIVA1;PARK7;GABARAP;CTNNA1;DAPK1;DAXX;DDX3X;AGTR2;CTTN;HIPK1;ERBB3;EYA2;FOXO3;BEX3;GCLC;GCLM;PYCARD;PDIA3;GSTP1;HMGB2;HSPA1A;HSPA1B;ICAM1;IFI27;IGF1;IL1A;IL1B;ITGA6;AR;KRT18;LGALS3;LMNA;MCL1;ATF3;G0S2;SERPINE1;NDUFA13;TNFRSF12A;PIK3R1;PMAIP1;PPP1CA;FAIM;PTPRC;BCL2;BCL2A1;BID;SFRP1;SFRP2;DEPTOR;SKIL;BMPR1B;SNAI2;SPI1;STK4;PRDX2;TGFB1;THBS1;TIMP3;TNF;TNFAIP3;TNFRSF1A;TNFRSF1B;SRPX;CAV1;TNFSF10…	6.1506	1.16e-27
GOBP_LIPID_METABOLIC_PROCESS	STUB1;AKR1A1;ABCA8;CDS1;ST3GAL6;LYPLA1;ECI2;NPC2;SORBS1;PTGES3;PLAAT3;PHB2;MGLL;LACTB;PTPMT1;OMA1;CLU;ADH1B;ADH5;COMT;ADM;CRABP2;CSF1R;ADRA2A;CYP1B1;FMC1;CYP4B1;DAB2;DGKH;DBI;SGMS2;CCDC71L;SPTSSA;DIO2;ECH1;ECHS1;EDN1;EDNRB;EGR1;EPHX1;ESR1;ETFB;ALDH1A1;FABP5;FABP6;ACSL1;ACSL3;ACSL4;PTK2B;ALDH1A3;ALDH3B1;JAZF1;FDFT1;FDPS;FDXR;FGR;PTGR1;PLCB1;SLC44A1;ALOX12;ABCA4;ALOX5AP;NR5A1;FUCA1;SERINC5;TIPARP;Z…	2.47751	1.49e-27
GOBP_REGULATION_OF_CELL_CYCLE	PDCD6IP;CDKN1A;CDK2AP2;CDKN1C;CCNO;CITED2;RACK1;GPNMB;SMC2;HEXIM1;CETN2;GIPC1;RUVBL2;GADD45G;MORF4L1;BTG3;CCNI;PHB2;CKS2;CLIC1;ANAPC16;PLK3;CCN2;CTNNB1;NEK10;GADD45A;DDX3X;DUSP1;EDN1;EIF4E;EIF4G2;AIF1;EREG;MECOM;EVI2B;STOX1;PPP1R35;MAPK15;MAPRE3;PLCB1;PPP1R15A;CDC26;SYF2;KANK2;GAS1;NUPR1;CHORDC1;CHMP2A;SFN;RGCC;CHMP4A;GPR132;ANAPC4;SERTAD1;NOP53;ANXA1;NR4A1;HNRNPU;APEX1;HES1;BIRC3;HSPA1A;HSPA1B;H…	2.67217	1.55e-27
GOBP_BIOLOGICAL_PROCESS_INVOLVED_IN_SYMBIOTIC_INTERACTION	IFITM3;SIVA1;IFITM2;CFL1;LRRC15;ROMO1;CSF1R;CTSB;CTSL;CXADR;CD55;DPP4;EEF1A1;EPHA2;FCN1;CDHR3;FN1;GAPDH;GAS6;CHMP2A;CHMP4A;GSN;HLA-DRB1;HMGB1;HSPA1A;HSPA1B;HSPA8;HSP90AB1;HSPD1;ICAM1;IFI27;APOE;CXCL8;INSR;ITGA5;ITGB1;JUN;RPSA;LDLR;LGALS1;LTF;LY6E;CD46;MRC1;RNASEK;P4HB;F11R;CHMP5;PLSCR1;TREM1;PPIA;PPIB;PPID;ARL8B;AXL;ST6GALNAC1;TMPRSS4;CHMP1B;PTX3;NECTIN2;CCL3;CCL4;CCL5;NUCKS1;SLC3A2;BSG;TCP1;DYNL…	4.98293	2.56e-27
GOBP_MULTICELLULAR_ORGANISM_REPRODUCTION	CITED2;WFDC2;CIB1;PRDX4;CETN2;ADAM28;PRDX3;TMED2;CCNI;IFT27;ADCYAP1R1;PACRG;CREM;CFAP54;CREB3L4;CTNNB1;CTSB;TCF23;CXADR;CFAP206;CYP1B1;DDX3X;DEFB1;EDN1;EDNRA;EDNRB;EGR1;A2M;SPAG17;CFAP221;EREG;ESR1;ACSL4;PTK2B;FOXJ1;FOXO3;TUT4;SYNE1;SUN1;FOLR1;CADM1;NR5A1;CFAP65;CATSPERD;GALNT3;DPCD;RAI14;SPAG8;MYCBP;B4GALT1;GJA1;GJB2;ANG;TSSK4;CFAP157;CFAP47;GPX4;IFT81;SLC2A8;ANXA1;HMGB2;HOXA10;BIRC3;DNAJA1;HSPA…	2.89536	3.05e-27
GOBP_ADAPTIVE_IMMUNE_RESPONSE	IGHV1-69D;LILRB2;CLEC10A;CXCL13;MASP2;CTSC;NLRP3;CLU;SLC15A4;CTSH;CTSL;CTSS;CD55;JAG1;GPR183;AHR;GAPT;ALCAM;PTK2B;FCER1G;ZBTB1;FOXJ1;CADM1;TMEM98;IGKV1-5;IGHV6-1;IGHV5-51;IGHV4-61;IGHV4-59;IGHV4-39;IGHV4-34;IGHV4-4;IGHV3-74;IGHV3-53;IGHV3-49;IGHV3-48;IGHV3-33;IGHV3-30;IGHV3-23;IGHV3-21;IGHV3-20;IGHV3-15;IGHV3-13;IGHV3-11;IGHV3-7;IGHV2-5;IGHV1-18;IGHV1-3;IGLV7-46;IGLV6-57;IGLV5-52;IGLV3-25;IGLV3-2…	3.18896	4e-27
GOBP_REGULATION_OF_BODY_FLUID_LEVELS	MYL9;PROCR;AGR2;MYL12A;PDPN;CLIC1;COL3A1;COMP;ADM;CLDN4;CSRP1;ADRA2A;ADRA2C;CYBA;DGKH;EDN1;EDNRB;F3;FBLN1;FCER1G;JMJD1C;ENPP4;FLG;FLNA;FN1;ALOX12;GAS6;GJA5;GNAI2;GNAS;SFN;ANXA2;HBB;ANXA5;HIF1A;HSPB1;APOE;APRT;IL6ST;AQP3;IL18;ILK;STMN1;LMAN1;MET;MT-CO2;NFE2L2;NME1;SERPINE1;SERPINB2;PAM;F11R;PDGFRA;SERPINA1;PLAT;PLAUR;PLEK;PLSCR1;PPIA;AXL;PRLR;HEG1;CCND1;ACTB;RPLP0;SAA1;SCNN1A;ANXA8;PRDX2;TFPI;THBD…	4.31913	4.43e-27
GOBP_POSITIVE_REGULATION_OF_ORGANELLE_ORGANIZATION	PDCD6IP;PPIF;ARPC2;AKAP9;WASF2;SMC2;CDC42EP3;RUVBL2;FERMT2;DSTN;PARK7;SYNPO;CCN2;CTNNB1;DCN;EDN1;CTTN;ENDOG;EREG;PTK2B;PPP1R35;MAPK15;PLCB1;FAM162A;GRB2;GRN;RGCC;SLC25A4;PYCARD;SLC25A5;GSN;ANXA1;ANXA2;HCK;HCLS1;HIF1A;HNRNPA1;HNRNPA2B1;HSPA1A;HSPA1B;ID1;IGF1;IL1A;IL1B;INSR;RHOA;RHOC;LCP1;LMAN1;CHCHD10;ARL2;MAP1B;MET;MSN;MSX1;MSX2;FIS1;SH3GLB1;ZMYND10;ANAPC5;ANAPC11;PFN1;PFN2;PLA2G5;PLAUR;STX18;PLE…	3.76732	4.69e-27
GOBP_CHEMICAL_HOMEOSTASIS	CD24;RACK1;SLC34A2;NPC2;EHD1;CYB561D2;CORO1A;PARK7;CKB;CLIC2;ADM;CP;CLDN4;ADRA2A;CTSH;CYB561;CYBA;DDX3X;EDN1;EDNRA;EDNRB;ENDOG;ERN1;ALAS2;FABP5;PTK2B;FKBP1A;FOXO1;FOXO3;FLG;FLNA;PRND;ALOX12;FTH1;FTL;BACE2;MPC2;CLIC4;ZBTB20;GAS6;GATA4;GCLC;GCLM;GLS;GNAI2;SFN;ANK3;GRN;ORMDL2;MYLIP;GSTP1;SLC40A1;HIF1A;HLA-DRB1;ICAM1;APOE;IGFBP5;IL1A;AQP3;IL18;INSIG1;INSR;ARF1;STMN1;LCN2;LDLR;LEP;LEPR;LPL;LTF;PIM3;ME…	2.71943	7.98e-27
GOBP_HUMORAL_IMMUNE_RESPONSE_MEDIATED_BY_CIRCULATING_IMMUNOGLOBULIN	IGHV1-69D;MASP2;CLU;CD55;FOXJ1;IGHV6-1;IGHV5-51;IGHV4-61;IGHV4-59;IGHV4-39;IGHV4-34;IGHV4-4;IGHV3-74;IGHV3-53;IGHV3-49;IGHV3-48;IGHV3-33;IGHV3-30;IGHV3-23;IGHV3-21;IGHV3-20;IGHV3-15;IGHV3-13;IGHV3-11;IGHV3-7;IGHV2-5;IGHV1-18;IGHV1-3;CFI;IGHA1;IGHA2;IGHG1;IGHG2;IGHG4;IGHM;IGKC;CD46;PTPRC;SERPING1;TNF;C1R;C1S;C3;C4A;C4B;C4BPA;C6;C7;CD81	10.2569	8.81e-27
GOBP_POSITIVE_REGULATION_OF_CELL_CELL_ADHESION	CD24;LILRB2;CITED2;CXCL13;PDPN;HSPH1;CORO1A;NLRP3;MAP3K8;CD55;DPP4;EGR3;AIF1;ZBTB1;FOXO3;GCNT1;ABL2;ANK3;PYCARD;ANXA1;HLA-A;HLA-DMA;HLA-DMB;HLA-DPA1;HLA-DPB1;HLA-DQA1;HLA-DQA2;HLA-DQB1;HLA-DRA;HLA-DRB1;HLA-DRB5;HLA-E;HMGB1;HES1;HSPD1;IGF1;IGFBP2;IHH;IL1A;IL1B;IL6ST;IL7R;IL10;IL18;IRAK1;ITGB2;RHOA;LEP;LGALS1;CD46;MDK;AFDN;PNP;F11R;PLAUR;PODXL;B2M;PTPRC;SELENOK;ACTB;RPS3;CCL2;CCL5;CCL21;VSIR;NFKBIZ…	4.78597	1.19e-26
GOBP_REGULATION_OF_CYSTEINE_TYPE_ENDOPEPTIDASE_ACTIVITY	PDCD6;DNAJB6;RACK1;LAMTOR5;ARL6IP5;PRDX3;PARK7;NLRP3;CARD16;CRYAB;CST3;CCN2;CTSD;CTSH;DAPK1;DDX3X;F3;ARL6IP1;MTCH1;TNFAIP8;PRDX5;GAS6;FAM162A;BEX3;SFN;PYCARD;GSN;HMGB1;NR4A1;BIRC3;HSPD1;HSPE1;IFI16;CCN1;RHOA;LTF;ARRB2;MAP3K5;MGMT;MYC;FIS1;RPS27L;NDUFA13;SERPINB9;PLAUR;PMAIP1;CYCS;POR;USP47;UACA;IFT57;LGMN;PTGS2;RPS3;S100A8;S100A9;BID;PERP;SFRP2;CLEC7A;SLC1A1;THBS1;TNF;VEGFA;LAPTM5;CAST;TNFSF10;CF…	5.74825	1.26e-26
GOBP_REGULATION_OF_DEFENSE_RESPONSE	TNIP1;CEBPB;HEXIM1;CTSC;FGL2;IRAK3;PARK7;MGLL;NLRP3;SLC15A4;C2CD4A;CYBA;DDT;EDNRB;A2M;EREG;ESR1;FCN1;FGR;CADM1;ALOX5AP;XRCC6;SAMHD1;TRAF3IP1;GATA6;NUPR1;PDCD4;NEAT1;GPR17;GPS2;GPX4;GRN;PYCARD;GSTP1;ANXA1;HCK;CFH;HLA-A;HLA-B;HLA-DRB1;AOAH;HLA-E;HMGB1;HMGB2;BIRC3;HSP90AA1;IFI16;IGF1;APOE;IL1B;IL1R1;IL6ST;IL10;IL18;IDO1;IRF1;ARG2;C2CD4B;LDLR;LEP;LGALS1;LGALS2;LPL;ARRB2;MDK;MGST2;MNDA;NDUFC2;NFE2L2;N…	3.24582	1.74e-26
GOBP_EXPORT_FROM_CELL	PDCD6IP;AP1M2;GIPC1;KDM5B;ERP29;RAB31;CHGA;CORO1A;PARK7;RAB3IP;SLC16A10;OSCP1;COMP;ADM;CPE;SELENOM;CCN2;ADRA2A;ADRA2C;DAB2;EDN1;EDNRB;ENG;STX2;ACSL4;FGF7;FGR;FOXO1;CD2AP;MPC2;PNKD;GATA2;ARFGAP3;GJA1;SERP1;CHMP2A;GLUL;GNAI2;ANG;CAVIN1;TRARG1;RGCC;SLC40A1;ANXA1;ANXA2;HCK;ANXA3;HIF1A;HLA-DRB1;HMGCR;NR4A1;ICA1;IGF1;APOE;IL1A;IL1B;IL1RN;ITGAM;ITGB2;KCNE1;ARL4D;LEP;LIF;LLGL2;LTBP2;M6PR;PIM3;MIA2;MIF;MY…	2.89513	1.77e-26
GOBP_REGULATION_OF_VASCULATURE_DEVELOPMENT	PDCD6;KLF2;GPNMB;CXCL13;CHI3L1;LRG1;HSPB6;COL4A2;ADM;CTNNB1;CTSH;CYBB;CYP1B1;DCN;GADD45A;ECM1;EFNA1;EPHA2;ENG;HIPK1;F3;PTK2B;STAB1;SULF1;TSPAN12;DDAH1;GATA2;GATA4;GATA6;GLUL;GRN;RGCC;GTF2I;ANXA3;HIF1A;HSPB1;ID1;IL1A;IL1B;CXCL8;IL10;ITGA5;ITGAX;ITGB1;ITGB8;JUP;RHOB;LEP;MDK;NFE2L2;NINJ1;SERPINE1;ENPP2;SERPINF1;PGK1;PKM;WNT4;MYDGF;ADAMTS9;PTGIS;RNH1;ROCK1;RRAS;S100A1;SFRP1;SFRP2;NIBAN2;SPARC;STAT3;B…	4.48319	1.9e-26
GOBP_DEFENSE_RESPONSE_TO_BACTERIUM	IGHV1-69D;WFDC2;SPON2;CEBPB;CXCL13;GNLY;ADAMTS5;CHGA;ROMO1;CYBA;DEFB1;EPHA2;FAU;MPEG1;FCER1G;FGR;STAB1;CLEC4E;GBP2;ANG;IGHV6-1;IGHV5-51;IGHV4-61;IGHV4-59;IGHV4-39;IGHV4-34;IGHV4-4;IGHV3-74;IGHV3-53;IGHV3-49;IGHV3-48;IGHV3-33;IGHV3-30;IGHV3-23;IGHV3-21;IGHV3-20;IGHV3-15;IGHV3-13;IGHV3-11;IGHV3-7;IGHV2-5;IGHV1-18;IGHV1-3;IGKV3-20;GRN;PYCARD;ANXA3;HLA-A;HLA-E;HMGB2;HP;IRF8;IGHA1;IGHA2;IGHG1;IGHG2;IG…	4.34249	1.95e-26
GOBP_RESPONSE_TO_EXTRACELLULAR_STIMULUS	CDKN1A;POSTN;GABARAP;GABARAPL2;OMA1;PLIN2;COL1A1;COMT;ADM;CTSK;CYBA;CYBB;CYP1B1;ADRB3;DAD1;TLE5;NQO1;AHCY;AIF1;A2M;ACSL1;FOXO1;FOXO3;FOLR1;FOS;GABARAPL1;KANK2;GAS6;GATA4;GCLC;GCLM;GLUL;GNAI2;DCPS;DNAJC15;HNRNPA1;HSPA5;HSPA8;IFI16;APOE;IGFBP2;IL1A;AQP3;LDLR;LEP;LPL;MAP1B;MAP3K5;MGMT;MN1;ASL;MAP1LC3C;ATF3;NFE2L2;ATP2B1;NUCB2;NR4A2;SH3GLB1;PDK4;PIM1;PMAIP1;WNT4;SLC38A2;POR;AXL;WDR45B;PTGS2;PTPRC;BCH…	3.74524	1.96e-26
GOBP_REGULATION_OF_CELL_PROJECTION_ORGANIZATION	CDH2;ACTR2;ARPC2;WASF2;SEMA6B;SEMA3C;CIB1;CDC42EP3;PDLIM5;PDPN;CFL1;SDCCAG8;EHD1;RAB3IP;PIFO;CRABP2;CUX1;DAB2;DPYSL3;EFNA1;EPHA2;EPS8;PTK2B;PPP1R35;MAPK15;DKK1;FLNA;SYNE2;ARC;COBL;DENND5A;FN1;MACF1;PLXNB2;NEGR1;SH3YL1;ABL2;INTU;GOLGA4;RAPGEF1;GRN;MYLIP;HES1;HSPA5;HSP90AA1;ICAM1;ID1;IFRD1;APOE;ITGA6;ITGA3;RHOA;TACSTD2;CAPRIN1;MAP1B;MAP4;MBP;MDK;NEDD9;NFE2L2;ZMYND10;DCDC2;DYNC2LI1;ENPP2;SERPINF1;PF…	3.23984	2.01e-26
GOBP_LEUKOCYTE_DIFFERENTIATION	TRIB1;LILRB2;CITED2;CEBPB;FGL2;KDELR1;NLRP3;KLF6;CSF1R;CTNNB1;CTSK;CTSL;GPR183;EGR1;EGR3;EPHA2;EVI2B;PTK2B;FBN1;FCER1G;ZBTB1;FOXJ1;FOXO3;FOS;XRCC6;TMEM98;GAS6;GATA2;CLEC4E;PRELID1;GPC3;GPS2;TMEM176B;SLC25A5;ANXA1;ANXA2;HCLS1;HLA-B;HLA-DRA;HLA-DRB1;HMGB1;IRF8;ID2;IFI16;RBPJ;IHH;IL1A;IL1B;IL7R;IL10;IRF2BP2;IL18;IRF1;ITGB1;ITGB8;JUN;JUNB;RHOA;LEP;LEPR;LGALS1;LGALS3;LIF;LTF;CD46;DNAJB9;MDK;MITF;MMP14…	3.44218	2.42e-26
GOBP_BIOLOGICAL_PROCESS_INVOLVED_IN_INTERACTION_WITH_HOST	IFITM3;SIVA1;IFITM2;LRRC15;CTSB;CTSL;CXADR;CD55;DPP4;EPHA2;FCN1;CDHR3;GAS6;CHMP2A;CHMP4A;GSN;HLA-DRB1;HMGB1;HSPA1A;HSPA1B;HSP90AB1;HSPD1;ICAM1;CXCL8;INSR;ITGA5;ITGB1;RPSA;LDLR;LGALS1;LTF;LY6E;CD46;MRC1;RNASEK;P4HB;F11R;CHMP5;PLSCR1;PPIA;PPID;ARL8B;AXL;TMPRSS4;CHMP1B;PTX3;NECTIN2;SLC3A2;BSG;TCP1;DYNLT1;TFRC;CXCR4;DDX39B;IFITM1;CAV1;VAMP8;SNX3;NRP1;CH25H;CLDN1;JPT2;XPR1;VAPA;CD74;CD81	6.28493	2.98e-26
GOBP_MULTICELLULAR_ORGANISMAL_HOMEOSTASIS	CEBPB;GADD45G;ADAMTS5;CORO1A;OMA1;COL3A1;DRAM2;COMP;CLDN4;CLDN3;CSF1R;CCN2;CTNNB1;CTSH;CTSK;CXADR;ADRB3;NXNL2;LCA5;DIO2;EDNRB;EGR1;ALDH1A1;FABP5;ACSL1;PTK2B;FOXO1;FLG;KDM6B;ALOX12;ABCA4;GATA2;GJA1;GNAS;SFN;CRB2;SLC40A1;HSPB1;ID1;IGHA1;IGHA2;IGKC;RBPJ;IHH;IL1A;IL1B;AQP3;IL18;ITGB1;LAMA4;STMN1;LCN2;LEP;LEPR;LIPA;LTF;LYZ;MBP;MET;MUC6;G0S2;PRDX1;F11R;PDK4;PIGR;IL20RA;LGR4;MAP2K6;PRLR;MUC13;B2M;PTGER3…	3.61647	3.01e-26
GOBP_CELLULAR_MACROMOLECULE_CATABOLIC_PROCESS	TOB1;TRIB1;STUB1;RACK1;CLGN;IGF2BP2;OGA;GIPC1;HNRNPA0;SEC61B;KCNQ1OT1;PARK7;GABARAP;CIRBP;CLU;ANAPC16;PLK3;UBXN10;SLFN13;CST3;CTNNB1;CTSL;DAB2;DDX5;ENDOG;ERN1;PTK2B;USP12;FBXO21;TNRC6B;UBXN4;TUT4;TRIM2;RYBP;PRAME;CARHSP1;CD2AP;HSPBP1;EDC4;LSM5;CDC26;FUS;RNF144B;SVIP;LSM4;ARIH1;RNF19A;SERBP1;PABPC1;CHMP2A;LSM1;GCLC;UBE2S;ANG;RNF149;DCPS;CHMP4A;MYLIP;ANAPC4;NOP53;HNRNPAB;HNRNPC;HNRNPU;APEX1;HSPA1A;…	2.72036	3.71e-26
GOBP_PROTEIN_FOLDING	DNAJB6;PPIF;PDIA6;CLGN;PFDN6;PRDX4;AHSA1;NUDC;PTGES3;HSPH1;RUVBL2;ERP29;DNAJB4;CLU;ERP27;HSPB6;CRYAB;FKBP1A;FKBP2;FKBP5;HSPBP1;SDF2L1;CHORDC1;PPIL6;GRN;PDIA3;DNAJA1;HSPA1A;HSPA1B;HSPA5;HSPA6;HSPA8;HSPA9;HSPB1;HSP90AA1;HSP90AB1;HSPD1;HSPE1;DNAJB1;DNAJB13;LMAN1;ARL2;NKTR;P4HB;ZMYND10;WDR83OS;PFDN5;DNAJC10;PPIA;PPIB;PPIC;PPID;DNAJA4;B2M;RANBP2;ST13;TBCA;TCP1;HSP90B1;CCT3;CALR;CANX;LTBP4;CCT6A;PDCD5;…	5.89503	4.28e-26
GOBP_ION_TRANSMEMBRANE_TRANSPORT	MRLN;COX17;PPIF;AKAP9;ATP5PD;ARL6IP5;SLC34A2;ATP5MG;AHCYL1;CORO1A;PARK7;PHB2;ADCYAP1R1;CLIC1;CLIC2;SLC15A4;SLC25A29;SLC43A2;OSR1;COX4I1;COX5B;EMB;COX6A1;COX6B1;COX7B;COX8A;CLDN4;TMEM37;TMC4;CCN2;ADRA2A;CTSS;CYB5A;CYBA;CYBB;CNKSR3;DAPK1;SLC26A2;EDN1;EDNRA;EDNRB;PTK2B;LRRC55;FKBP1A;FLNA;ARL6IP1;ARC;FOLR1;ATP6V1C2;GABRP;MPC2;CLIC4;GAS6;NIPSNAP2;GEM;GJA1;GNB2;ANK3;GRIK3;RANGRF;SLC25A4;SLC25A5;SLC25A6…	2.5932	4.33e-26
GOBP_REGULATION_OF_T_CELL_ACTIVATION	CD24;LILRB2;GPNMB;CEBPB;HSPH1;FGL2;CORO1A;NLRP3;MAP3K8;CTNNB1;CD55;DPP4;EGR3;AIF1;ZBTB1;FOXJ1;FOXO3;ABL2;PRELID1;PYCARD;ANXA1;HLA-A;HLA-DMA;HLA-DMB;HLA-DPA1;HLA-DPB1;HLA-DQA1;HLA-DQA2;HLA-DQB1;HLA-DRA;HLA-DRB1;HLA-DRB5;HLA-E;HMGB1;HES1;HSPD1;IGF1;IGFBP2;IHH;IL1A;IL1B;IL6ST;IL7R;IL10;IL18;IDO1;IRF1;JUNB;ARG2;RHOA;LEP;LGALS1;LGALS3;CD46;MDK;PNP;PAWR;PRKAR1A;B2M;PELI1;PTPRC;SELENOK;RAC2;ACTB;RPS3;CC…	4.32494	4.54e-26
GOBP_REGULATION_OF_ANATOMICAL_STRUCTURE_SIZE	ARPC5;ARPC3;ARPC1B;ARPC2;KLF2;SEMA6B;SEMA3C;LAMTOR5;CDC42EP3;DSTN;TRIOBP;CORO1A;TMEM123;AP2M1;ADD3;CLNS1A;PLEKHH2;COMP;ADM;MTPN;CRABP2;ADRA2A;ADRA2C;ADRB3;DPYSL2;AGTR2;EDN1;EDNRA;EDNRB;ELN;CTTN;EPS8;PTK2B;FN1;COTL1;MACF1;PPP1R15A;GCH1;BLOC1S1;GJA5;GCLC;GCLM;GOLGA4;GRB2;PYCARD;GSN;HBB;HCK;HCLS1;HSP90AA1;HSP90AB1;IFRD1;APOE;IL7R;RHOA;LAMTOR4;LEP;MAP1B;MMP2;MSN;NPM1;ATP2B1;HP1BP3;LIMA1;PFN1;PFN2;PLE…	3.68832	5.56e-26
GOBP_AXONEME_ASSEMBLY	DNAAF1;CFAP206;DNAAF4;DNAH5;SPAG17;RSPH9;FOXJ1;CLUAP1;CFAP65;SPEF1;GAS8;DNAI1;TEKT2;CFAP157;CFAP47;CCDC39;RSPH4A;CFAP100;DNAAF3;DNAJB13;CFAP73;ZMYND10;HYDIN;CFAP46;CCDC40;MNS1;CFAP44;DNAH7;CC2D2A;RP1;DNAI2;SPAG1;UBE2B;SPAG16;CFAP69;SPEF2;TTC26;CFAP43;DNAL1;CCDC65;RSPH1;TPGS1;DRC1;SPAG6	11.826	6.05e-26
GOBP_LEUKOCYTE_CHEMOTAXIS	CXCL13;CHGA;CORO1A;JAML;CSF1R;CSF3R;CXADR;DDT;DPP4;DUSP1;GPR183;EDN1;EDNRB;AIF1;PTK2B;FCER1G;GAS6;CXCL1;CXCL2;CXCL3;ANXA1;HMGB1;IL1B;CXCL8;IL10;ITGB2;LGALS3;MDK;MIF;MMP2;NBL1;NEDD9;NINJ1;SERPINE1;SBDS;CKLF;PDE4B;TREM1;PPIA;PPIB;LGMN;S100A14;PTN;RAC1;RAC2;RARRES2;RPS19;S100A8;S100A9;S100A12;SAA1;CCL2;CCL3;CCL3L1;CCL4;CCL5;CCL20;CCL21;CXCL12;GPSM3;SPI1;BSG;THBS1;TNFAIP6;C3AR1;C5AR1;VEGFA;CXCR4;CALR…	5.59905	9.57e-26
GOBP_POSITIVE_REGULATION_OF_TRANSFERASE_ACTIVITY	CD24;CDKN1A;STUB1;CIB1;PTGES3;ERP29;FERMT2;CHI3L1;AKAP13;PARK7;PHB2;CKS2;CLU;PIFO;CSF1R;CTNNB1;ADRA2A;ADRA2C;NEK10;DAXX;DBI;DDX3X;EDN1;EFNA1;EGR1;EPHA2;EPHB6;ERBB3;EREG;ERN1;ACSL1;PTK2B;STOX1;MAPK15;FGR;MAPRE3;DKK1;XRCC6;SERINC5;PARM1;GAS6;UBE2S;ANG;RGCC;HLA-DRB1;HMGN1;HNRNPA2B1;HSP90AA1;HSP90AB1;IGF1;APOE;CCN1;IL1B;IL18;INSR;IRAK1;AREG;RHOA;LCP2;LEP;LTF;MAP3K5;MET;MIF;MYC;NEDD9;NPM1;DDR2;TAOK3;P…	3.41261	1.13e-25
GOBP_RESPONSE_TO_PEPTIDE_HORMONE	NAMPT;SORBS1;NUDC;AHCYL1;RAB31;TWIST2;COL1A1;COL3A1;ADM;CCN2;CTSK;CYBA;CYBB;CYP1B1;AGTR2;EDN1;EDNRA;EDNRB;EGR1;EREG;FBN1;FOXO1;PLCB1;FOS;NR5A1;GCNT1;DNAI1;GJB2;GCLC;GNAI2;TRARG1;GRB2;SLC2A8;ANXA1;NR4A1;APEX1;IGFBP1;IGFBP5;APRT;IL1B;IL10;INSIG1;INSR;JUND;AREG;LEP;LPL;MAP1B;NCL;NFE2L2;NFKB1;ATP2B1;DDR2;NR4A2;PDK4;PIK3R1;PKM;PLAT;ERRFI1;POR;LEPROT;VPS13C;SELENOS;AGTRAP;PTGS2;PTPN1;PTPRE;RAB13;RARRES…	4.0157	1.25e-25
GOBP_DETOXIFICATION	AKR1A1;FBLN5;PRDX4;PRDX3;PARK7;CLIC2;OSCP1;ADH5;NQO1;ESD;ALDH1A1;ALOX5AP;PRDX5;GCH1;H19;GPX3;GPX4;GSTM3;GSTP1;HBA1;HBA2;HBB;HP;APOE;GSTK1;MGST1;MGST2;MGST3;MT1E;MT1F;MT1G;MT1H;MT1M;MT1X;MT2A;NFE2L2;PRDX1;PIM1;SLC47A1;SELENOS;PTGS2;S100A9;SELENOW;SLC22A5;SOD1;SOD2;SOD3;PRDX2;TXN;SLC30A1;PXDN;PRXL2A;CAT;TXNDC17;CD36;PRDX6	7.54645	1.72e-25
GOBP_PATTERN_SPECIFICATION_PROCESS	SPRY1;CITED2;BASP1;SEMA3C;TMED2;DNAAF1;PIFO;OSR1;CFAP52;CTNNB1;DNAAF4;DNAH5;EDN1;DZIP1L;EMX2;ENG;HIPK1;ETS2;ENKUR;CFAP53;DKK1;FOXJ1;CLUAP1;ARC;COBL;RPGRIP1L;FOLR1;CFAP45;DPCD;IFT172;GAS8;GATA4;DNAI1;INTU;GPC3;CRB2;HIF1A;HOXA10;HOXB5;HOXB6;HOXB7;HES1;CCDC39;RBPJ;DNAAF3;IHH;AR;ITGAM;LAMA5;LRP2;SMAD5;MEIS2;MSX1;MSX2;NBL1;PBX1;DYNC2LI1;HSPB11;AHI1;CCDC40;IFT57;MNS1;HES6;RELN;PTCH1;CC2D2A;SHROOM3;RFX3…	3.77689	2.42e-25
GOBP_NEGATIVE_REGULATION_OF_IMMUNE_SYSTEM_PROCESS	TRIB1;LILRB2;GPNMB;CEBPB;FGL2;IRAK3;COL3A1;CTNNB1;CD55;DDT;DPP4;TSC22D3;DUSP1;AHR;ELF1;A2M;FBN1;FGR;FOXJ1;PLCB1;SAMHD1;GATA2;GBP1;GPR17;GPS2;TMEM176B;GRN;PHPT1;ANXA1;HCK;HLA-A;HLA-B;HLA-DRB1;HLA-E;HMGB1;HSPA9;ID2;IFI16;APOD;IHH;IL7R;IL10;IDO1;IRF1;ARG2;LDLR;LGALS3;LTF;ARRB2;CD46;MDK;MIF;MNDA;MYC;NBL1;PAWR;SERPINB9;PIK3R1;PARP14;PRKAR1A;AXL;SELENOS;PSMA1;PELI1;PTPRC;RPS19;CCL2;CCL3;CCL21;SDC4;CXCL…	3.86601	2.61e-25
GOBP_MITOTIC_CELL_CYCLE	PDCD6IP;SPRY1;CDKN1A;CDK2AP2;CDKN1C;CCNO;TUBA1B;TUBB3;TUBB4B;GPNMB;CIB1;TACC2;SMC2;CETN2;CFL1;NUDC;TUBGCP2;BTG3;CCNI;PHB2;EFHC1;CKS2;ANAPC16;PLK3;CTNNB1;TOGARAM2;DDX3X;DUSP1;EDN1;EDNRA;EIF4E;AIF1;TUBB;EPS8;EREG;STOX1;PDS5B;FLNA;PLCB1;CDC26;SYF2;KANK2;GAS1;GEM;GJA1;CHMP2A;UBE2S;ANK3;RGCC;CHMP4A;GPR132;ANAPC4;NOP53;ANXA1;HNRNPU;APEX1;HES1;HSPA1A;HSPA1B;ID2;ID4;DCDC1;IGF1;IK;IL1A;IL1B;IL10;INSR;ITGB…	2.76483	2.8e-25
GOBP_MYELOID_LEUKOCYTE_MIGRATION	CXCL13;CHGA;JAML;CSF1R;CSF3R;CXADR;DDT;DPP4;DUSP1;EDN1;EDNRB;AIF1;PTK2B;FCER1G;PLCB1;B4GALT1;CXCL1;CXCL2;CXCL3;ANXA1;HMGB1;IL1A;IL1B;IL1R1;CXCL8;ITGB2;LGALS3;MDK;CD99;MIF;MMP2;MMP14;NBL1;SERPINE1;CKLF;PDE4B;PIK3R1;TREM1;PPIA;PPIB;LGMN;S100A14;SELENOK;RAC1;RAC2;RARRES2;RPS19;S100A8;S100A9;S100A12;SAA1;CCL2;CCL3;CCL3L1;CCL4;CCL5;CCL20;CCL21;CXCL12;SPI1;BSG;THBS1;TNFAIP6;C3AR1;C5AR1;VEGFA;TRIM55;CD9…	5.46841	2.89e-25
GOBP_CELL_GROWTH	RASGRP2;CDKN1A;NET1;RACK1;SEMA6B;SEMA3C;FBLN5;CIB1;DNPH1;PDLIM5;CCDC85B;AKAP13;DCBLD2;MTPN;CRABP2;CRYAB;CTNNB1;CYBA;DAB2;DDX3X;DPYSL2;AGTR2;EDN1;EDNRA;EIF4G2;CTTN;ENO1;C9orf72;ALCAM;PTK2B;PI16;EPB41L3;COBL;FN1;MACF1;GATA4;GJA1;GOLGA4;SFN;LAMTOR2;HSPA1A;HSPA1B;HSP90AA1;HSP90AB1;IFRD1;IGF1;APOE;IGFBP1;IGFBP3;IGFBP4;IGFBP5;IGFBP7;ITGB1;RHOA;KRT17;MAP1B;MMP14;MSX1;NPM1;NDUFA13;USP47;PPT1;MEG3;SEMA3G;…	3.67744	3.03e-25
GOBP_MUSCLE_TISSUE_DEVELOPMENT	CITED2;SEMA3C;DDX17;PDLIM5;VAMP5;AKAP13;COL3A1;COL11A1;OSR1;MTPN;MYL6B;CSRP1;CSRP2;CTNNB1;CXADR;DDX5;RCAN1;DSG2;DSP;EDN1;EDNRA;EGR1;ELN;ENG;ERBB3;EYA2;PI16;FKBP1A;DKK1;KDM6B;FLNB;FOS;MAFF;CBY1;TIPARP;GATA4;GATA6;NUPR1;GJA1;GJA5;EFEMP2;NR4A1;HNRNPU;PRMT1;ID2;IFRD1;IGF1;IGFBP5;RBPJ;IHH;ITGB1;JARID2;RHOA;LMNA;LRP2;ARRB2;SMAD5;MSX1;MSX2;MYH11;MYL6;ATF3;NDUFV2;PDGFRA;PIM1;PKP2;PRKAR1A;GPCPD1;ADAMTS9;P…	3.97345	4.16e-25
GOBP_CATION_TRANSMEMBRANE_TRANSPORT	MRLN;COX17;PPIF;AKAP9;ATP5PD;SLC34A2;ATP5MG;CORO1A;PARK7;PHB2;ADCYAP1R1;CLIC2;SLC15A4;SLC25A29;SLC43A2;OSR1;COX4I1;COX5B;COX6A1;COX6B1;COX7B;COX8A;TMEM37;CCN2;ADRA2A;CTSS;CYB5A;CYBA;CNKSR3;DAPK1;EDN1;EDNRA;EDNRB;PTK2B;LRRC55;FKBP1A;FLNA;ARC;ATP6V1C2;GAS6;NIPSNAP2;GEM;GNB2;ANK3;RANGRF;SLC25A4;SLC25A5;UQCR10;SEC61A1;SLC40A1;ANXA2;ITGB1;NDUFS7;KCNE1;KCNN3;C4orf3;RNASEK;MT-ATP6;MT-ATP8;MT-CO1;MT-CO2;…	2.75041	6.17e-25
GOBP_REGULATION_OF_ESTABLISHMENT_OF_PROTEIN_LOCALIZATION	RACK1;LYPLA1;CIB1;ERP29;CHGA;PKIG;PARK7;SLC51B;PLK3;ADRA2A;CTSD;ACSL3;ACSL4;FOXO1;FLNA;CD2AP;SVIP;MPC2;GAS6;SERP1;GLUL;SFN;ANG;ANK3;HCLS1;HIF1A;HLA-DRB1;HMGCR;DNAJA1;HSPA8;HSP90AA1;HSP90AB1;ICA1;IFI27;APOD;IGF1;APOE;IL1A;IL1B;INSIG1;ITGAM;ITGB2;JUP;KCNE1;LCP1;LEP;LLGL2;LMAN1;PIM3;MYH10;OAZ1;PAM;FIS1;PCM1;SH3GLB1;ERGIC3;PFKL;PIK3R1;TOMM7;LEPROT;PPIA;PPID;VPS35;PTGS2;PTPN1;RHOU;SELENOK;RAC2;RAN;UBL…	3.53582	9.66e-25
GOBP_NEGATIVE_REGULATION_OF_TRANSCRIPTION_BY_RNA_POLYMERASE_II	AASS;KLF2;CITED2;N4BP2L2;CEBPB;HEXIM1;TXNIP;MAGED2;PKIG;OSR2;PLK3;OSR1;CREM;CTNNB1;TCF23;CUX1;DAB2;GADD45A;AEBP1;DDX5;TLE5;GLIS3;ARX;EDN1;EDNRB;EFNA1;EGR1;ENO1;ESR1;ETS2;ETV3;JAZF1;TFEC;ZBTB1;DKK1;FOXJ1;FOXO1;FOXO3;WWC1;RYBP;FOSB;EID1;MAFF;SPDEF;KANK2;ZBTB20;GATA2;GATA4;GATA6;GPS2;LMCD1;NOP53;HCLS1;HDGF;HIC1;HMGB1;HMGB2;HNRNPA2B1;HNRNPU;HES1;HSBP1;HSPA1A;DNAJB1;IRF8;ID1;ID2;ID3;ID4;IFI16;IFI27;RB…	2.7257	1.37e-24
GOBP_EMBRYONIC_ORGAN_DEVELOPMENT	DNAJB6;CITED2;CEBPB;SPINT2;TMED2;TRIOBP;CTHRC1;OSR2;DNAAF1;PIFO;COL11A1;OSR1;ADM;CTNNB1;DLX5;EDN1;EDNRA;EFNA1;EPHA2;A2M;ENG;HIPK1;STOX1;ALDH1A3;FBN1;EFEMP1;PPP1R35;CLUAP1;COBL;FOLR1;SYF2;IFT172;GATA2;GATA4;CRB2;GRB2;HIF1A;HOXB5;HOXB6;HOXB7;HES1;ID2;CCDC39;ID3;CCN1;RBPJ;IHH;CXCL8;IL10;INSIG1;JUNB;KRT19;LIF;MMP14;MSX1;MYO6;PBX1;PDGFRA;PRRX1;AHI1;CCDC40;IFT57;MAP2K1;PTCH1;CC2D2A;RARRES2;RBBP6;RPL10;…	3.79359	1.45e-24
GOBP_CELL_RECOGNITION	IGHV1-69D;SPON2;CLGN;CORO1A;EMB;VCAN;FCN1;PALLD;FOLR1;CADM1;B4GALT1;IGHV6-1;IGHV5-51;IGHV4-61;IGHV4-59;IGHV4-39;IGHV4-34;IGHV4-4;IGHV3-74;IGHV3-53;IGHV3-49;IGHV3-48;IGHV3-33;IGHV3-30;IGHV3-23;IGHV3-21;IGHV3-20;IGHV3-15;IGHV3-13;IGHV3-11;IGHV3-7;IGHV2-5;IGHV1-18;IGHV1-3;IGHA1;IGHA2;IGHG1;IGHG2;IGHG4;IGHM;IGKC;LGALS3;MFGE8;MSN;NEDD9;OVGP1;PAEP;CFP;PLA2G5;SPA17;RTN4;PTX3;CCL21;CLEC7A;BSG;TCP1;CCT3;C…	5.64781	1.45e-24
GOBP_POSITIVE_REGULATION_OF_MAPK_CASCADE	CDH2;CD24;GPNMB;CIB1;ARL6IP5;GADD45G;ERP29;FERMT2;CHI3L1;AKAP13;CAVIN3;PHB2;CSF1R;CCN2;CTNNB1;ADRA2A;ADRA2C;NEK10;ADRB3;GADD45A;DDT;GPR183;EDN1;EFNA1;ERN1;PTK2B;DKK1;PLCB1;WWC1;GAS6;GATA4;GNAI2;LAMTOR2;PYCARD;HLA-DRB1;HMGB1;PRMT1;ICAM1;IGF1;APOE;IGFBP3;IGFBP4;IGFBP6;IL1A;IL1B;INSR;IRAK1;AR;JUN;LEP;LIF;ARRB2;MAP3K5;MIF;GADD45B;DDR2;OSM;TAOK3;PDGFRA;PLA2G2A;PLA2G5;PPIA;MYDGF;MAP2K1;MAP2K2;MAP2K3;MA…	3.60441	1.85e-24
GOBP_MITOCHONDRIAL_ELECTRON_TRANSPORT_NADH_TO_UBIQUINONE	PARK7;DNAJC15;NDUFS7;MT-ND1;MT-ND2;MT-ND3;MT-ND4;MT-ND4L;MT-ND5;MT-ND6;NDUFA1;NDUFA2;NDUFA3;NDUFA4;NDUFA5;NDUFA7;NDUFA8;NDUFAB1;NDUFB1;NDUFB2;NDUFB3;NDUFB4;NDUFB5;NDUFB6;NDUFB7;NDUFB8;NDUFB9;NDUFC1;NDUFC2;NDUFS5;NDUFS6;NDUFV2	22.1059	2.28e-24
GOBP_CELLULAR_COMPONENT_MORPHOGENESIS	CDH2;CDH11;ACTR2;WASF2;TUBB3;MYL9;SEMA6B;SEMA3C;PDLIM5;PDPN;CFL1;AKAP13;C12orf57;EMB;CRABP2;CSF1R;CSRP1;CSRP2;CTNNB1;CUX1;ARX;DLX5;DPYSL2;EDN1;EDNRA;EFNA1;EPHA2;CTTN;C9orf72;EPHB6;ALCAM;PHACTR1;PALLD;EPB41L3;FLNC;ARC;COBL;FN1;MACF1;PLXNB2;GFRA3;GOLGA4;ANK3;HSP90AA1;HSP90AB1;APLP2;ID1;IFRD1;APOE;IHH;ITGB1;ITGB4;KIF5B;RHOA;KRT19;LAMA5;LAMC2;STMN1;LRP2;CAPRIN1;MAP1B;MBP;MDK;MYH11;NBL1;NFIB;NR4A2;SHA…	2.96085	2.4e-24
GOBP_REGULATION_OF_PROTEIN_CONTAINING_COMPLEX_ASSEMBLY	ARPC5;ARPC3;ARPC1B;ARPC2;AKAP9;STUB1;RACK1;CXCL13;CDC42EP3;FERMT2;TRIOBP;CORO1A;PARK7;CLU;ADD3;MTPN;CLDN7;CRYAB;DDX3X;ELN;CTTN;EPS8;ESR1;PTK2B;MAPK15;MAPRE3;DKK1;COTL1;RPL13A;SVIP;TRAF3IP1;GRB2;RANGRF;DNAJC15;PYCARD;GSN;NOP53;HCK;HCLS1;HMGB1;HES1;HSPA1A;HSPA1B;HSPA5;HSPA8;HSP90AA1;APOE;RHOA;RHOC;STMN1;LCP1;LGALS3;ARL2;MAP1B;MET;MSN;SH3GLB1;TPPP3;PFN1;PFN2;PLEK;VPS35;BRK1;PMEPA1;TWF1;FNIP2;SLAIN2;…	3.95718	2.75e-24
GOBP_NEGATIVE_REGULATION_OF_LOCOMOTION	TRIB1;CITED2;SEMA6B;SEMA3C;CXCL13;SPINT2;PODN;COL3A1;CLDN3;CSNK2B;CTNNA1;CYP1B1;DCN;GADD45A;DDT;DPP4;DPYSL3;JAG1;DUSP1;AGTR2;AIF1;ENG;FBLN1;MAPK15;FOXO3;SULF1;PLCB1;ZMYND8;CLIC4;GJA1;RGCC;HAS1;HMGB1;APEX1;APOD;APOE;IGFBP3;IGFBP5;JUP;RHOA;RHOB;ARHGDIB;LRP1;TACSTD2;MIF;MITF;AFDN;NBL1;NEDD9;NFE2L2;SERPINE1;SERPINF1;PFN2;PLXNB3;WNT4;DNAJA4;SEMA3G;ADAMTS9;SINHCAF;RAC1;RBBP4;RBBP7;BCL2;RRAS;CCL2;CCL21;…	3.90019	3.73e-24
GOBP_POSITIVE_REGULATION_OF_PEPTIDASE_ACTIVITY	TANK;PDCD6;RACK1;ARL6IP5;NLRP3;CLDN4;CLDN3;CCN2;CTSD;CTSH;DAPK1;DDX3X;EFNA1;F3;FBLN1;FN1;MTCH1;FAM162A;BEX3;PRELID1;GRN;PYCARD;GSN;HMGB1;HSPD1;HSPE1;IFI16;CCN1;RHOA;MBP;MAP3K5;MYC;FIS1;RPS27L;NDUFA13;PCOLCE;PMAIP1;CYCS;UACA;IFT57;PSENEN;LGMN;PSME1;PSME2;RPS3;S100A8;S100A9;BID;PERP;VSIR;SFRP2;CLEC7A;SLC1A1;STAT3;TNF;LAPTM5;ANTXR1;CAV1;TNFSF10;CFLAR;PDCD5;EIF2AK3	6.07219	3.74e-24
GOBP_MORPHOGENESIS_OF_A_BRANCHING_STRUCTURE	SPRY1;SEMA3C;SPINT2;KDM5B;TMED2;PHB2;COL4A1;ADM;CTNNB1;CTSH;CTSZ;AGTR2;EDN1;EDNRA;EPHA2;ENG;ESR1;FGF7;SULF1;CLIC4;GPC3;GRB2;HOXB7;IHH;IL10;ILK;AR;AREG;LAMA5;TACSTD2;MDK;MET;MMP14;MSX2;MYC;PBX1;PGR;WNT4;PPP1CA;LGR4;RTN4;PTCH1;NTN4;BCL2;PRDM1;SFRP1;SFRP2;SNAI2;SOX9;SOX10;SPINT1;STK4;TBX3;HNF1B;TGM2;TNF;VEGFA;WNT2;DDR1;PAX8;NRP1;SOCS3;DLG5	5.94934	3.78e-24
GOBP_REGULATION_OF_CELLULAR_MACROMOLECULE_BIOSYNTHETIC_PROCESS	TOB1;EIF1;RAMP1;EIF1B;RACK1;SORBS1;IGF2BP2;TMED2;CIRBP;SLC51B;MSI2;MTPN;CTNNB1;CYP1B1;DAPK1;DBI;DDX3X;DIO2;EEF2;EIF4A2;EIF4B;EIF4E;EIF4G2;EIF5;EIF5A;PTK2B;FOXO3;TNRC6B;PLCB1;TUT4;RPL13A;PPP1R15A;PLXNB2;SVIP;BACE2;GAPDH;PABPC1;SERP1;LSM1;EIF3K;ANG;COA3;DCPS;MRPL13;HNRNPU;PRMT1;HSPB1;IGF1;IGFBP5;INSR;EIF3E;RHOA;KRT17;CAPRIN1;NCL;NPM1;YBX1;PA2G4;PAWR;RPS27L;PAIP2;SLC25A37;NGRN;PER1;PKM;POLR2G;PPP1CA…	3.34411	4.38e-24
GOBP_NEGATIVE_REGULATION_OF_PROTEIN_MODIFICATION_PROCESS	HIPK3;AASS;TRIB1;SPRY1;CDKN1A;CDKN1C;RACK1;CIB1;HEXIM1;IVNS1ABP;TMED2;PKIG;IRAK3;PARK7;NCOA7;CTNNB1;COPS9;CNKSR3;DBI;GADD45A;DUSP1;DUSP6;ENG;C9orf72;FBLN1;FKBP1A;DKK1;PPP1R15A;TRAF3IP1;CHORDC1;PDCD4;GCLC;GNAI2;SFN;GPS2;PYCARD;GSTP1;HMGCR;DNAJA1;HSPA1A;HSPA1B;HSPB1;APOE;IGFBP3;IL1B;JARID2;JUN;LGALS3;LRP1;ARRB2;MLLT1;GADD45B;NPM1;UBXN1;RTRAF;FXYD1;ERRFI1;DNAJC10;DDIT4;PARP14;TRIM44;PPIA;OXR1;PRKAR1…	3.50332	4.58e-24
GOBP_REGULATION_OF_PROTEIN_STABILITY	TSPAN1;SERF2;STUB1;IFI30;PFDN6;PTGES3;GIPC1;RUVBL2;PARK7;PHB2;CLU;PIH1D2;SLC51B;CRYAB;CTNND1;CTSH;DAD1;EFNA1;FLNA;GAPDH;RNF149;GRN;PYCARD;MYLIP;GSN;NOP53;HSPA1A;HSPA1B;HSPA8;HSP90AA1;HSP90AB1;HSPD1;IGF1;LMNA;MDM2;CCDC88C;MSX1;ATP1B1;ATP1B3;NPM1;SH3GLB1;PFDN5;PFN1;PFN2;PIM1;PIK3R1;DPM3;TOMM7;CTSA;TRIM44;PPIB;CMTM6;USP47;VPS35;IFT46;RTN4;BCL2;RPL5;RPL11;RPS7;SOX17;SOX4;SPAG1;STK4;TBX3;TCP1;CCT3;TYR…	4.4421	4.65e-24
GOBP_REGULATION_OF_CELL_SUBSTRATE_ADHESION	ARPC2;CIB1;AGR2;PDPN;FERMT2;TRIOBP;COL1A1;COL8A1;COL16A1;CCDC80;DAB2;JAG1;PTK2B;FBLN1;FBLN2;FLNA;FN1;MACF1;ABI3BP;GBP1;EFEMP2;APOD;CCN1;ILK;ITGA3;ITGA5;JUP;RHOA;LIMS1;ARL2;TACSTD2;MDK;MMP14;NEDD9;NID1;P4HB;SERPINE1;PIK3R1;PKP2;WNT4;RAC1;RAC2;BCL2;ROCK1;RRAS;S100A10;CCL21;SDC4;SFRP1;STK4;THBS1;THY1;TLN1;ACTG1;UTRN;VCL;VEGFA;DDR1;DOCK5;ACTN4;CALR;NRP1;MYADM;CD36;SPOCK2;CDC42	5.59754	4.69e-24
GOBP_NEGATIVE_REGULATION_OF_TRANSPORT	MRLN;PPIF;LILRB2;RACK1;LYPLA1;ARL6IP5;ERP29;CHGA;PKIG;CORO1A;PARK7;CLIC2;SLC43A2;OSR1;CRYAB;ADRA2A;ADRA2C;EDN1;ERBB3;FABP5;PTK2B;FKBP1A;FOXO1;SVIP;PNKD;GEM;GJA1;GNAI2;ANK3;ANXA1;ANXA2;HMGB1;HMGCR;HES1;APOC1;APOD;APOE;IL1B;INSIG1;KCNE1;LEP;LGALS3;LIF;LMAN1;C4orf3;LRPAP1;MAP1B;PIM3;NFKB1;OAZ1;OSM;FIS1;PFKL;PLSCR1;VPS35;SELENOS;PTGER3;PTGS2;RAC1;RAP1A;RAP1B;BCL2;RGS2;RGS4;RRAD;SDCBP;SFRP1;SFRP4;SPI1…	3.62974	5.11e-24
GOBP_CELL_CYCLE_PROCESS	PDCD6IP;ACTR2;SPRY1;CDKN1A;CDK2AP2;CCNO;GPNMB;TACC2;SMC2;CETN2;CFL1;NUDC;GIPC1;SDCCAG8;TUBGCP2;CCNI;KIF3A;PHB2;EFHC1;CKS2;PLK3;CCN2;CTNNB1;NEK10;GADD45A;TOGARAM2;DDX3X;DUSP1;EDN1;EDNRA;EIF4E;AIF1;CENPX;TUBB;EPS8;EREG;STOX1;PPP1R35;MAPK15;MAPRE3;PDS5B;FLNA;PLCB1;SUN1;CDC26;SYF2;KANK2;CCDC69;PHGDH;GATA6;GEM;GJA1;CHORDC1;CHMP2A;UBE2S;ANK3;RGCC;NTMT1;CHMP4A;GPR132;ANAPC4;SLC2A8;NOP53;ANXA1;ANXA11;HNR…	2.4245	7e-24
GOBP_EPITHELIAL_CELL_DEVELOPMENT	CDH2;SPINT2;COL15A1;CLDN3;JAG1;EDNRA;EDNRB;RILPL2;EPHA2;ESR1;FOXJ1;PALLD;FLNB;PLCB1;FOSL2;SPDEF;CLIC4;GATA2;B4GALT1;SFN;RAPGEF1;GSTM3;HIF1A;ICAM1;IHH;IL1A;IL1B;IL6ST;AR;KCNE1;MET;AFDN;CCDC88C;MSN;F11R;PGR;PODXL;HYDIN;RAB25;HEG1;SHROOM3;RAB13;ACTA2;RAP1A;RAP1B;RFX3;RHEB;ROCK1;PRDM1;SOX9;STC1;KLF5;TJP1;TNF;TNFRSF1A;VCL;VEGFA;EZR;VIM;CXCR4;IFT74;COL18A1;CLDN1;MYADM;TJP2	5.61936	8.62e-24
GOBP_IN_UTERO_EMBRYONIC_DEVELOPMENT	DNAJB6;KLF2;CITED2;EMG1;N4BP2L2;CEBPB;SLC34A2;SPINT2;TMED2;COL3A1;ADM;CCDC24;CTNNB1;DAD1;DSC3;EDN1;EDNRA;ELF3;SMIM14;ENDOG;ATP11A;RPGRIP1L;MAFF;SYF2;GATA2;GATA6;B9D1;GRB2;HIF1A;PRMT1;HES1;IGF1;CCN1;RBPJ;IHH;IL10;AR;ITGB1;JUNB;KRT19;LIF;TM4SF1;MBNL1;MGAT1;MSX1;MT-ND4;NASP;NDUFA2;YBX1;SBDS;PDGFRA;SF3B6;BRK1;MAP2K1;RTN4;PTCH1;HEG1;RBBP6;RBBP8;RCN1;RPL13;PRDM1;SOX17;SKIL;SOX10;SPINT1;ZFP36L1;STK4;TBX…	3.97929	1.03e-23
GOBP_REGULATION_OF_VESICLE_MEDIATED_TRANSPORT	PDCD6IP;RACK1;LYPLA1;GIPC1;EHD1;LMAN2;RAB31;CORO1A;AP2M1;CLU;ADRA2A;CYBA;DAB2;ACSL3;FCER1G;FCN1;MAPK15;FGR;DKK1;ARC;CD2AP;GAS1;GAS6;GATA2;ABL2;GPC3;CHMP2A;GNAI2;PYCARD;ANXA1;ANXA2;HCK;HMGB1;HNRNPK;APOC1;APOE;IL1B;INSR;ITGAM;ITGB2;ARF1;LGALS3;LRP1;LRPAP1;ARRB2;MFGE8;MSN;SEPTIN2;ATP2A2;SERPINE1;CFP;PFN2;PLA2G5;STX18;PLSCR1;AHI1;PPT1;AXL;MAP2K1;MAP2K2;B2M;RAB25;PTPN1;PTPRC;PTX3;RAB13;RAC1;RAC2;RAP1A…	3.37979	1.25e-23
GOBP_SEXUAL_REPRODUCTION	WFDC2;CLGN;CIB1;PRDX4;CETN2;KDM5B;ADAM28;CCNI;IFT27;PARK7;ADCYAP1R1;PACRG;CREM;CFAP54;CREB3L4;CTNNB1;CXADR;CFAP206;DDX3X;DEFB1;EDN1;EDNRA;SPAG17;CFAP221;STX2;EREG;PTK2B;FOXJ1;FOXO3;PLCB1;TUT4;SYNE1;SUN1;FOLR1;PRND;CADM1;CFAP65;CATSPERD;GALNT3;DPCD;CLIC4;RAI14;SPAG8;MYCBP;B4GALT1;GJA1;ANG;TSSK4;CFAP157;CFAP47;GPX4;IFT81;SLC2A8;HMGB2;HOXA10;BIRC3;DNAJA1;IGF1;IHH;IL1A;AR;ITGB1;LEP;LEPR;SMAD5;CD46;MD…	2.74132	1.49e-23
GOBP_CELLULAR_HOMEOSTASIS	RACK1;PRDX4;SLC34A2;PRDX3;CORO1A;CKB;CLIC2;CLNS1A;CP;ADRA2A;CYB561;CYBA;NQO1;EDN1;EDNRA;ENDOG;ERN1;ALAS2;PTK2B;FKBP1A;FOXO1;FOXO3;FLNA;PRND;FTH1;FTL;PRDX5;MPC2;CLIC4;ZBTB20;GAS6;GATA4;GCLC;GCLM;UBE2S;GRN;ORMDL2;SLC40A1;HIF1A;HLA-DRB1;APEX1;ICAM1;APOE;IL1A;ARF1;LCN2;PIM3;MCL1;RNASEK;MT1E;MT1F;MT1G;MT1H;MT1M;MT1X;MT2A;MYC;ATOX1;ATP1A1;NFE2L2;ATP1B1;ATP1B3;NPM1;ATP2A2;ATP2B1;PRDX1;ATP5F1B;FIS1;ATP6V…	2.90107	1.72e-23
GOBP_RESPONSE_TO_HYDROGEN_PEROXIDE	PPIF;NET1;KLF2;RACK1;TXNIP;PRDX3;PARK7;COL1A1;CRYAB;CYP1B1;NQO1;EDN1;ENDOG;ERN1;PTK2B;FOXO3;KDM6B;ANXA1;HBA1;HBA2;HBB;HP;APEX1;IL10;AREG;RHOB;MAP3K5;MET;MMP2;MT-ND5;MT-ND6;NFE2L2;DDR2;PAWR;OSER1;AXL;PLEKHA1;BCL2;RPS3;SOD1;SOD2;TNFAIP3;TXN;NR4A3;CAPN2;MAP1LC3A;CAT;PPP1R15B;SPHK1	7.97406	2.73e-23
GOBP_POSITIVE_REGULATION_OF_LEUKOCYTE_CELL_CELL_ADHESION	CD24;LILRB2;HSPH1;CORO1A;NLRP3;MAP3K8;CD55;DPP4;EGR3;AIF1;ZBTB1;FOXO3;GCNT1;ABL2;PYCARD;ANXA1;HLA-A;HLA-DMA;HLA-DMB;HLA-DPA1;HLA-DPB1;HLA-DQA1;HLA-DQA2;HLA-DQB1;HLA-DRA;HLA-DRB1;HLA-DRB5;HLA-E;HMGB1;HES1;HSPD1;IGF1;IGFBP2;IHH;IL1A;IL1B;IL6ST;IL7R;IL18;IRAK1;ITGB2;RHOA;LEP;LGALS1;CD46;MDK;PNP;B2M;PTPRC;SELENOK;ACTB;RPS3;CCL2;CCL5;CCL21;VSIR;NFKBIZ;SMARCE1;SOX4;TFRC;THY1;TNF;VCAM1;XBP1;ZBTB16;NR4A3…	4.81105	2.91e-23
GOBP_B_CELL_ACTIVATION	CDKN1A;IGHV1-69D;PHB2;SLC15A4;KLF6;GPR183;AHR;GAPT;PTK2B;ZBTB1;FOXJ1;IGHV6-1;IGHV5-51;IGHV4-61;IGHV4-59;IGHV4-39;IGHV4-34;IGHV4-4;IGHV3-74;IGHV3-53;IGHV3-49;IGHV3-48;IGHV3-33;IGHV3-30;IGHV3-23;IGHV3-21;IGHV3-20;IGHV3-15;IGHV3-13;IGHV3-11;IGHV3-7;IGHV2-5;IGHV1-18;IGHV1-3;GPS2;SLC25A5;HSPD1;IRF8;ID2;IGHA1;IGHA2;IGHG1;IGHG2;IGHG4;IGHM;IGKC;RBPJ;IL7R;IL10;IRF2BP2;ITGB1;LGALS1;DNAJB9;MIF;MMP14;MNDA;PA…	4.23681	3.1e-23
GOBP_TRANSMEMBRANE_RECEPTOR_PROTEIN_SERINE_THREONINE_KINASE_SIGNALING_PATHWAY	TOB1;SPRY1;STUB1;CDKN1C;CITED2;GIPC1;SUB1;FERMT2;FSTL1;VASN;LRG1;COL1A2;COL3A1;COMP;CSNK2B;DAB2;DDX5;DLX5;EGR1;ENG;FBN1;FKBP1A;DKK1;SULF1;FOLR1;FOS;FAM89B;GATA4;GATA6;GPC3;PDCD4;CRB2;HES1;HSPA1A;HSPA5;HSP90AB1;ID1;CCN1;RBPJ;ILK;ITGA3;ITGB1;ITGB8;JUN;LRP1;LRP2;LTBP1;LTBP2;ARRB2;SMAD5;SMAD9;MSX1;MSX2;NBL1;CRIM1;ASPN;C20orf27;HTRA1;PMEPA1;SINHCAF;RBBP4;RBBP7;SDCBP;SFRP1;SFRP2;SFRP4;SKIL;BMPR1B;SORL1…	3.93431	3.4e-23
GOBP_MEMBRANE_INVAGINATION	IGHV1-69D;RAB31;AIF1;GATA2;CHMP2A;IGHV6-1;IGHV5-51;IGHV4-61;IGHV4-59;IGHV4-39;IGHV4-34;IGHV4-4;IGHV3-74;IGHV3-53;IGHV3-49;IGHV3-48;IGHV3-33;IGHV3-30;IGHV3-23;IGHV3-21;IGHV3-20;IGHV3-15;IGHV3-13;IGHV3-11;IGHV3-7;IGHV2-5;IGHV1-18;IGHV1-3;CHMP4A;GSN;IGHA1;IGHA2;IGHG1;IGHG2;IGHG4;IGHM;IGKC;ITGAM;ITGB2;ARF1;RHOA;MFGE8;FNBP1L;RAC1;RAC2;THBS1;C3;SNX3;CD36;CDC42	7.66524	3.64e-23
GOBP_POSITIVE_REGULATION_OF_VASCULATURE_DEVELOPMENT	PDCD6;CHI3L1;LRG1;HSPB6;ADM;CTSH;CYBB;CYP1B1;ECM1;ENG;HIPK1;F3;PTK2B;DDAH1;GATA2;GATA4;GATA6;GRN;ANXA3;HIF1A;HSPB1;IL1A;IL1B;CXCL8;IL10;ITGA5;ITGAX;ITGB1;ITGB8;JUP;RHOB;MDK;NFE2L2;NINJ1;SERPINE1;PKM;MYDGF;PTGIS;RRAS;S100A1;SFRP2;STAT3;BTG1;THBS1;TJP1;C3;C3AR1;C5AR1;TWIST1;VEGFA;XBP1;CXCR4;ADAM12;EMILIN2;NRP1;SPHK1;SEMA5A;MTDH;KLF4	6.08934	4.06e-23
GOBP_MUSCLE_CELL_DIFFERENTIATION	CDH2;MYL9;PDLIM5;EHD1;ADAMTS5;AKAP13;COMP;ADM;MTPN;CSRP1;CSRP2;CTNNB1;TCF23;CXADR;RCAN1;EDN1;EDNRA;EDNRB;ENG;EREG;PI16;DKK1;KDM6B;FLNC;ATP11A;SYNE1;CBY1;GATA4;GATA6;MYOF;PDCD4;EFEMP2;HNRNPU;HES1;ID2;IFRD1;IGF1;IGFBP5;RBPJ;ITGB1;KRT19;LAMB1;LMNA;ARRB2;MDM2;MMP14;MSX1;MYH11;NID1;NINJ1;ATP2A2;YBX1;MYEF2;PDGFRA;WNT4;RBM38;PRKAR1A;RBM4;BCL2;RGS2;RGS4;NIBAN2;SOD2;SOX9;KLF5;TBX3;ZEB1;TGFB1;ACTG1;TPM1;VE…	3.83298	5.1e-23
GOBP_CELLULAR_RESPONSE_TO_EXTERNAL_STIMULUS	CDKN1A;POSTN;MAP3K2;GABARAP;GABARAPL2;PLIN2;COL1A1;COMT;MTPN;CTSK;CYBA;GADD45A;TLE5;AIF1;ENG;FOXO1;FOXO3;FOLR1;FOS;GABARAPL1;KANK2;GAS6;GCLC;GLUL;DCPS;DNAJC15;HNRNPA1;HSPA5;HSPA8;IFI16;IL1B;AQP3;IRF1;LEP;LPL;MAP3K5;MN1;MAP1LC3C;ATF3;NFE2L2;NFKB1;ATP2B1;NR4A2;F11R;SH3GLB1;PDK4;PIM1;PMAIP1;WNT4;SLC38A2;AXL;WDR45B;PTGS2;PTPRC;BCL2;PIEZO2;SFRP1;SFRP2;SLC2A1;SNAI2;SOX9;KLF10;TNFRSF1A;UCP2;UPP1;VCAM1;X…	4.33094	5.94e-23
GOBP_RESPONSE_TO_TUMOR_NECROSIS_FACTOR	TANK;KLF2;CIB1;CHI3L1;CARD16;COL1A1;CTSK;CYBA;CYP1B1;EDN1;EIF5A;ENDOG;HIPK1;PTK2B;FOXO3;FOS;GAS6;GBP1;GBP2;GBP3;GCH1;GPD1;GPS2;PYCARD;GSTP1;HES1;BIRC3;HSPA1A;HSPA1B;CXCL8;ILK;KRT18;LIMS1;MBP;MAP3K5;ASAH1;NFE2L2;NFKB1;NFKBIA;PTGS2;RPS3;CCL2;CCL3;CCL3L1;CCL4;CCL5;CCL20;CCL21;SFRP1;ZFP36L1;ZFP36L2;THBS1;TMSB4X;TNF;TNFAIP3;TNFRSF1A;TNFRSF1B;VCAM1;ZFP36;LAPTM5;ACTN4;TXNDC17;SPPL2A;YBX3;SPHK1;CLDN1;ARH…	4.99041	8.36e-23
GOBP_REGULATION_OF_HEMOPOIESIS	TRIB1;LILRB2;CEBPB;CIB1;FGL2;NLRP3;CSF3R;CTNNB1;JAG1;EGR3;EVI2B;PTK2B;FBN1;ZBTB1;FOXJ1;FOXO3;FOS;XRCC6;GAS6;GATA2;PRELID1;TMEM176B;ANXA1;HCLS1;HIF1A;HLA-B;HLA-DRA;HLA-DRB1;HMGB1;HMGB2;PRMT1;HSPA1A;HSPA1B;HSPA9;ID2;IHH;IL7R;IL10;IL18;IRF1;JUNB;RHOA;LGALS1;LGALS3;LIF;LTF;CD46;MDK;MEIS2;MITF;MMP14;RHEX;MYC;NEDD9;NFKBIA;PNP;PIK3R1;P4HTM;AXL;B2M;TCIM;PTN;PTPRC;ACTB;CCL3;PRDM1;VSIR;SFRP1;NFKBIZ;MEAF6;S…	3.79704	8.77e-23
GOBP_PROTEIN_LOCALIZATION_TO_PLASMA_MEMBRANE	CDH2;RAMP1;RACK1;LYPLA1;CIB1;ARL6IP5;AGR2;SORBS1;MYL12A;VAMP5;EHD1;TMED2;RAB31;AP2M1;LRRC15;DAB2;RILPL2;EPHA2;ACSL3;EPB41L3;FLNA;MACF1;TSPAN15;FYB1;GAS6;GBP1;GOLGA4;TRARG1;ANK3;RANGRF;AR;ITGA3;ITGB1;JUP;KIF5B;KRT18;LAMA5;LGALS3;LRP1;AFDN;MMP14;ATP1B1;ATP1B3;F11R;PIK3R1;PKP2;PPP2R5A;CCDC88A;VPS35;PTCH1;RAB13;RAP1A;ACTB;ROCK1;S100A10;SPTBN1;BSG;TGFB1;TNF;TNFRSF1A;EZR;RAB34;NUMB;VAMP8;RAB11A;SQSTM1;…	4.6242	9.94e-23
GOBP_CELLULAR_RESPONSE_TO_BIOTIC_STIMULUS	TRIB1;LILRB2;TNIP1;SPON2;CEBPB;CXCL13;TXNIP;NLRP3;CARD16;CD55;EDNRB;LY96;PDCD4;PYCARD;CXCL1;CXCL2;CXCL3;GSTP1;HCK;HMGB1;HMGB2;HSPA5;IRF8;IL1A;IL1B;CXCL8;IL10;IL18;IRAK1;IRAK2;RHOA;LTF;MIF;MRC1;NFKB1;NFKBIA;SERPINE1;PDE4B;CHMP5;AXL;SELENOS;MAP2K3;PLSCR4;CCL2;CCL3;CCL5;CLEC7A;SPI1;PRDX2;TGFB1;TSPO;TLR2;TNF;TNFAIP3;TNFRSF1B;VIM;XBP1;ZFP36;PABPN1;SLC7A5;CAPN2;PPP1R15B;KMO;MTDH;CD14;LY86;EIF2AK3;CD36;…	4.87691	1.19e-22
GOBP_CELL_CELL_JUNCTION_ORGANIZATION	CDH2;PDCD6IP;CDH11;FERMT2;CLDN4;CLDN3;CLDN7;FRMPD2;CSF1R;CTNNA1;CTNNB1;CTNND1;CXADR;DSG2;DSP;EPHA2;HIPK1;CDHR3;EPB41L3;FLNA;CLDN15;GJA1;GJA5;GJB2;IL1B;JUP;RHOA;RHOC;LIMS1;ARL2;AFDN;NPHP1;F11R;PKP2;HEG1;RAB13;ACTB;ROCK1;PERP;SNAI2;TGFB1;TJP1;TLN1;ACTG1;TNF;VCL;VEGFA;IRX3;OCEL1;SVEP1;PARD6B;PKP4;CAV1;NUMB;CLDN10;CLDN1;MYADM;DLG5;CD9;TJP2;CDC42;CDH1	5.53638	1.64e-22
GOBP_NEGATIVE_REGULATION_OF_GENE_EXPRESSION	CD24;TOB1;CDKN1A;SAP18;CNPY2;KLF2;CITED2;RACK1;GPNMB;DDX17;UPK3B;IGF2BP2;HNRNPA0;ERP29;KCNQ1OT1;IRAK3;PARK7;NLRP3;MIR155HG;CARD16;CIRBP;CLDN3;CRYAB;CCN2;CTNNB1;CTSZ;DAPK1;DAXX;DDX3X;DDX5;TLE5;EDN1;EPHA2;EIF4E;AIF1;SERPINB1;ENG;ERN1;ESR1;STOX1;FOXJ1;TNRC6B;TUT4;FN1;RPL13A;CARHSP1;CD2AP;EDC4;LSM5;FUS;LSM4;GAPDH;TIPARP;TMEM98;SERBP1;ZBTB20;TRAF3IP1;GAS1;GAS6;GATA2;GATA6;GBP1;PABPC1;PDCD4;LSM1;RBMS3;…	2.22344	1.9e-22
GOBP_PROTEIN_LOCALIZATION_TO_CELL_PERIPHERY	CDH2;RAMP1;RACK1;LYPLA1;CIB1;ARL6IP5;AGR2;SORBS1;MYL12A;VAMP5;EHD1;TMED2;RAB31;AP2M1;LRRC15;DAB2;RILPL2;EPHA2;EPB41L2;ACSL3;EPB41L3;FLNA;MACF1;TSPAN15;FYB1;GAS6;GBP1;GOLGA4;TRARG1;ANK3;RANGRF;AR;ITGA3;ITGB1;JUP;KIF5B;KRT18;LAMA5;LGALS3;ARL3;LRP1;AFDN;MMP14;ATP1B1;ATP1B3;F11R;PIK3R1;PKP2;LZTFL1;PPP2R5A;CCDC88A;VPS35;PTCH1;IFT80;RAB13;RAP1A;ACTB;ROCK1;S100A10;SLC1A1;SPTBN1;BSG;TGFB1;TNF;TNFRSF1A;EZ…	4.18056	2.02e-22
GOBP_MULTI_MULTICELLULAR_ORGANISM_PROCESS	CITED2;MAGED2;PRDX3;TMED2;COL16A1;ADM;CLDN4;ADRA2A;CTSB;TCF23;EDN1;ESR1;ACSL4;FBLN1;FOS;FOSB;MAFF;B4GALT1;GJA1;GJB2;IGFBP2;IGFBP5;IGFBP7;IHH;IL1B;IDO1;AR;ITGA3;ITGA5;ITGB4;JUNB;LEP;ARHGDIB;LIF;MMP2;OVGP1;PAM;TPPP3;PGR;PNOC;WNT4;SLC38A2;PRLR;PTGS2;PTN;BCL2;RGS2;RPL29;PRDM1;SLC2A1;SOD1;SPP1;STC1;BSG;NR2F2;THBD;TIMP1;UCP2;VEGFA;DDR1;CALR;VMP1;CAPN2	5.40755	2.02e-22
GOBP_AGING	CTSC;COL4A2;COMP;ADM;CRYAB;CCN2;CTNNA1;ADRB3;NQO1;EDN1;EDNRA;EDNRB;ENDOG;FOXO3;FOS;NR5A1;GJB2;SERP1;GCLC;GCLM;GPX4;GRB2;APEX1;APOD;IGFBP1;IGFBP2;IGFBP5;IL10;IRAK1;JUND;MBP;MME;MMP2;MT-ATP6;MT-CO1;MT-ND4;NFE2L2;ATP2B1;ATP5F1A;SERPINF1;PTGS2;SOD1;SOD2;TFRC;TSPO;TIMP1;SERPING1;TNFRSF1B;UCP2;VCAM1;CANX;CAT;KMO;CLDN1;CD68	6.36684	2.24e-22
GOBP_REGULATION_OF_CELL_MORPHOGENESIS	ACTR2;ARPC2;MYL12B;CFDP1;CIB1;CDC42EP3;MYL12A;PDPN;CFL1;FERMT2;TRIOBP;CORO1A;FGD4;CLDN4;CLDN3;CSF1R;CUX1;DAB2;EPS8;PTK2B;FBLN1;FGR;EPB41L3;FLNA;ARC;FN1;MACF1;PLXNB2;GBP1;ANXA1;HCK;ILK;ITGB2;RHOA;RHOB;RHOC;RND3;LIMS1;TACSTD2;CAPRIN1;MDK;MSN;MYH10;NEDD9;P4HB;F11R;ENPP2;PKP2;PLXNB1;PLXNB3;RELN;CDC42SE2;SHROOM3;RHOU;RAC1;RAC2;S100A10;CCL2;CCL3;SPARC;TPM1;VEGFA;EZR;CXCR4;LST1;DOCK5;ACTN4;CALR;MFSD2A;N…	4.36132	2.59e-22
GOBP_REGULATION_OF_ACTIN_FILAMENT_ORGANIZATION	ARPC5;ARPC3;ARPC1B;ARPC2;WASF2;CDC42EP3;FERMT2;DSTN;TRIOBP;CORO1A;SYNPO;ADD3;PLEKHH2;MTPN;CCN2;ELN;CTTN;C9orf72;EPS8;PTK2B;FLNA;COTL1;GRB2;RGCC;PYCARD;GSN;HCK;HCLS1;ID1;ARF1;RHOA;RHOC;STMN1;TACSTD2;MET;F11R;SHANK1;LIMA1;PFN1;PFN2;PIK3R1;PLEK;WNT4;CCDC88A;BRK1;TWF1;RAC1;RGS4;ROCK1;S100A10;CCL21;SDC4;CXCL12;SFRP1;SPTBN1;SPTBN2;TJP1;ACTG1;TMSB4X;TPM1;VASP;WAS;CAPZA2;RHPN2;NRP1;SEMA5A;MYADM;TMSB10;AR…	4.65058	2.8e-22
GOBP_TRANSMEMBRANE_RECEPTOR_PROTEIN_TYROSINE_KINASE_SIGNALING_PATHWAY	PDCD6;NAMPT;SPRY1;STUB1;AGR2;SORBS1;TXNIP;COL1A1;COL4A1;COL4A2;CSF1R;CCN2;CTNNB1;ADRA2A;DCN;AGTR2;EFNA1;EPHA2;EPHB6;ERBB3;EREG;F3;PTK2B;EFEMP1;FGF7;FGR;FOXO1;SULF1;PLCB1;TSPAN12;GALNT3;TIPARP;GFRA3;DNAI1;GNAI2;GRB2;RAPGEF1;SLC2A8;HCK;HIF1A;HSPB1;APOD;IGF1;IGFBP1;IGFBP2;IGFBP3;IGFBP4;IGFBP5;IGFBP6;RBPJ;IL1B;INSR;AR;ITGA5;AREG;STMN1;LCP2;LEP;LRP1;MET;MMP2;NCL;NEDD9;DDR2;CRIM1;PDGFRA;PDGFRL;PDK4;PIG…	3.0509	3.23e-22
GOBP_PHAGOCYTOSIS_RECOGNITION	IGHV1-69D;SPON2;FCN1;IGHV6-1;IGHV5-51;IGHV4-61;IGHV4-59;IGHV4-39;IGHV4-34;IGHV4-4;IGHV3-74;IGHV3-53;IGHV3-49;IGHV3-48;IGHV3-33;IGHV3-30;IGHV3-23;IGHV3-21;IGHV3-20;IGHV3-15;IGHV3-13;IGHV3-11;IGHV3-7;IGHV2-5;IGHV1-18;IGHV1-3;IGHA1;IGHA2;IGHG1;IGHG2;IGHG4;IGHM;IGKC;MFGE8;CFP;PLA2G5;PTX3;CLEC7A;C4B;C4BPA;CD36	9.80703	3.68e-22
GOBP_HEMOSTASIS	MYL9;PROCR;MYL12A;PDPN;CLIC1;COL3A1;COMP;CSRP1;ADRA2A;ADRA2C;DGKH;EDN1;F3;FBLN1;FCER1G;JMJD1C;ENPP4;FLNA;FN1;ALOX12;GAS6;GNAS;ANXA2;HBB;ANXA5;HSPB1;APOE;IL6ST;ILK;LMAN1;NFE2L2;SERPINE1;SERPINB2;F11R;PDGFRA;SERPINA1;PLAT;PLAUR;PLEK;PLSCR1;PPIA;AXL;ACTB;SAA1;ANXA8;PRDX2;TFPI;THBD;THBS1;TLN1;ACTG1;SERPING1;TSPAN8;VCL;VWF;WAS;VKORC1;TFPI2;EMILIN2;CAV1;ACTN1;PABPC4;CD9;CD36;CD59	5.14666	3.71e-22
GOBP_CELLULAR_RESPONSE_TO_PEPTIDE	NAMPT;KLF2;SORBS1;AHCYL1;RAB31;CYBA;CYP1B1;AGTR2;EDN1;EDNRA;FBN1;FOXO1;FOXO3;PLCB1;FOS;GJA1;DNAI1;GJB2;GCLC;GNAI2;TRARG1;GRB2;SLC2A8;NR4A1;APEX1;ICAM1;ID1;IGF1;IGFBP1;APRT;IL1B;INSIG1;INSR;LEP;LPL;LRP1;MAP1B;MDM2;NCL;NFE2L2;NFKB1;ATP2B1;DDR2;NR4A2;CHMP5;PDK4;PIK3R1;PKM;PLAT;ERRFI1;POR;LEPROT;SELENOS;LGMN;AGTRAP;PTPN1;PTPRE;RAB13;RARRES2;RBM4;ROCK1;SCNN1A;SRSF5;ZNF106;NUCKS1;SORL1;ZFP36L1;STAT3;TN…	3.90902	4.19e-22
GOBP_CELL_JUNCTION_ASSEMBLY	CDH2;PDCD6IP;CDH11;SORBS1;PDLIM5;FERMT2;COL16A1;CLDN4;CLDN3;CLDN7;FRMPD2;CTNNA1;CTNNB1;CTNND1;EPHA2;CTTN;HIPK1;PTK2B;CDHR3;DKK1;EPB41L3;FN1;MACF1;PLXNB2;CLDN15;NEGR1;ADGRF1;GJA1;GJA5;GJB2;PCDH17;RAPGEF1;APOD;IL1B;ITGA6;ITGA5;ITGB4;JUP;RHOA;RHOC;LIMS1;ARL2;MAP1B;AFDN;MMP14;NPHP1;F11R;PKP2;PLXNB1;WNT4;VPS35;HEG1;RAB13;RAC1;RAP1A;RAP1B;BCL2;ACTB;ROCK1;S100A10;SDC4;SDCBP;CLSTN2;SFRP1;SNAI2;DST;SPTBN2…	3.65662	4.6e-22
GOBP_RIBONUCLEOPROTEIN_COMPLEX_BIOGENESIS	NSA2;EMG1;C1D;EIF3M;DDX17;CELF2;PTGES3;RUVBL2;DDX52;RPL35;BUD23;PIH1D2;CLNS1A;DDX3X;EIF4B;EIF5;SF3B1;RPL13A;LSM4;RBMX;EIF3K;GLUL;NOP53;HSP90AA1;HSP90AB1;EIF3E;ISG20;RPSA;RBIS;GTF2H5;RPL10A;SNU13;NPM1;PA2G4;RPS27L;MRPS2;SBDS;RPL26L1;RSL24D1;NGRN;EIF3L;TRMT112;SF3B6;LUC7L3;PIN4;MRPL20;NOP10;NHP2;RAN;RPL5;RPL6;RPL7;RPL7A;RPL10;RPL11;RPL23A;RPL24;RPL26;RPL27;RPL35A;RPL38;RPLP0;RPS5;RPS6;RPS7;RPS8;RPS…	3.44684	5.27e-22
GOBP_ACTIN_FILAMENT_BUNDLE_ORGANIZATION	WASF2;SORBS1;FERMT2;SYNPO;CCN2;DPYSL3;AIF1;ELN;EPS8;PTK2B;PHACTR1;FLNA;RGCC;ID1;ITGB1;RHOA;RHOC;STMN1;LCP1;TACSTD2;MARCKS;MET;NEDD9;PAWR;F11R;SHANK1;LIMA1;PFN1;PFN2;PIK3R1;PLEK;PLS3;WNT4;CCDC88A;SHTN1;RAC1;ROCK1;S100A10;SDC4;SFRP1;TJP1;ACTG1;TPM1;HSP90B1;EZR;WAS;ZYX;CALD1;RHPN2;ACTN1;NRP1;PDLIM1;CD47;CDC42	6.36093	5.5e-22
GOBP_CYTOKINE_MEDIATED_SIGNALING_PATHWAY	TANK;CD24;LILRB2;IFITM3;CIB1;CXCL13;IFITM2;IRAK3;CARD16;CSF1R;CSF2RA;CSF3R;CSNK2B;ECM1;EDN1;EGR1;EIF5A;HIPK1;EREG;F3;ACSL1;PTK2B;FCER1G;FOXO3;PLCB1;SAMHD1;GAS6;GPR17;GPS2;PYCARD;CXCL1;CXCL2;CXCL3;GSTP1;HCK;HIF1A;BIRC3;HSPA1A;HSPA1B;IFI27;IFNGR1;IL1A;IL1B;IL1R1;IL1RN;IL6ST;IL7R;CXCL8;IL10RA;IL18;ILK;IRAK1;IRAK2;IRF1;KRT18;LEP;LEPR;LIMS1;RHEX;NFKBIA;OSM;P4HB;IL20RA;PARP14;TRIM44;AXL;PRLR;PTPN1;PTPR…	3.41108	6.29e-22
GOBP_INORGANIC_ION_TRANSMEMBRANE_TRANSPORT	MRLN;COX17;PPIF;AKAP9;ATP5PD;SLC34A2;ATP5MG;CORO1A;PARK7;PHB2;ADCYAP1R1;CLIC1;CLIC2;SLC15A4;OSR1;COX4I1;COX5B;COX6A1;COX6B1;COX7B;COX8A;CLDN4;TMEM37;CCN2;ADRA2A;CYB5A;CYBA;CNKSR3;SLC26A2;EDN1;EDNRA;EDNRB;PTK2B;LRRC55;FKBP1A;FLNA;ATP6V1C2;GABRP;CLIC4;GAS6;NIPSNAP2;GEM;GNB2;ANK3;RANGRF;SLC25A4;SLC25A5;UQCR10;SEC61A1;SLC40A1;ANXA2;ITGB1;NDUFS7;KCNE1;KCNN3;C4orf3;RNASEK;MT-ATP6;MT-ATP8;MT-CO1;MT-CO2;…	2.61935	6.45e-22
GOBP_ENDOTHELIUM_DEVELOPMENT	PDPN;FSTL1;COL15A1;CLDN3;CSNK2B;CTNNB1;JAG1;EDNRA;EDNRB;KDM6B;PLCB1;CLIC4;GJA5;RAPGEF1;GSTM3;SLC40A1;HOXB5;ICAM1;ID1;RBPJ;IL1B;ITGAX;RHOA;RHOB;MET;AFDN;MSN;F11R;HEG1;RAP1A;RAP1B;ROCK1;SOX17;STC1;ZEB1;BTG1;NR2F2;TJP1;TNF;TNFRSF1A;VCL;VEGFA;EZR;CXCR4;COL18A1;EDF1;NRP1;CLDN1;MYADM;TJP2	7.01145	6.94e-22
GOBP_REGULATION_OF_B_CELL_ACTIVATION	CDKN1A;IGHV1-69D;SLC15A4;GPR183;AHR;FOXJ1;IGHV6-1;IGHV5-51;IGHV4-61;IGHV4-59;IGHV4-39;IGHV4-34;IGHV4-4;IGHV3-74;IGHV3-53;IGHV3-49;IGHV3-48;IGHV3-33;IGHV3-30;IGHV3-23;IGHV3-21;IGHV3-20;IGHV3-15;IGHV3-13;IGHV3-11;IGHV3-7;IGHV2-5;IGHV1-18;IGHV1-3;ID2;IGHA1;IGHA2;IGHG1;IGHG2;IGHG4;IGHM;IGKC;IL10;MIF;MMP14;MNDA;PAWR;PRLR;PELI1;PTPRC;BCL2;SAMSN1;SFRP1;ZFP36L1;ZFP36L2;TFRC;TGFB1;TNFAIP3;TYROBP;XBP1;LAPT…	5.64596	7.72e-22
GOBP_CELLULAR_RESPONSE_TO_TOXIC_SUBSTANCE	AKR1A1;FBLN5;PRDX4;PRDX3;PARK7;CLIC2;ADH5;NQO1;ESD;ALDH1A1;ALOX5AP;PRDX5;GCH1;H19;GPX3;GPX4;GSTM3;GSTP1;HBA1;HBA2;HBB;HP;APOE;GSTK1;MGST1;MGST2;MGST3;NFE2L2;PRDX1;PIM1;SELENOS;PTGS2;S100A9;SELENOW;SOD1;SOD2;SOD3;PRDX2;TNF;TXN;PXDN;PRXL2A;CAT;TXNDC17;CD36;PRDX6	7.86773	8.65e-22
GOBP_REGULATION_OF_PROTEIN_CATABOLIC_PROCESS	TRIB1;STUB1;RACK1;GIPC1;IRAK3;PARK7;GABARAP;GABARAPL2;CLU;PLK3;CST3;ADRA2A;DAB2;DNAAF4;NQO1;EEF1A1;FOXO1;FLNA;RYBP;HSPBP1;RNF144B;SVIP;ARIH1;RNF19A;TIPARP;NUPR1;GPC3;GCLC;MYLIP;NOP53;ANXA2;HMGCR;HSPA1A;HSPA1B;HSP90AA1;HSP90AB1;APOE;IL1B;IL10;LDLR;LRP1;LRP2;MDM2;MSN;NFE2L2;OAZ1;UBXN1;NDUFA13;AZIN1;CTSA;LAPTM4B;VPS35;PSME1;PSME2;ROCK1;RPL11;SDCBP;SOX17;SUMO2;SORL1;SOX9;ELOB;TIMP1;TIMP2;TIMP3;TMF1;T…	3.97535	8.91e-22
GOBP_POSITIVE_REGULATION_OF_KINASE_ACTIVITY	CD24;CDKN1A;CIB1;ERP29;FERMT2;CHI3L1;AKAP13;PARK7;PHB2;CKS2;CLU;PIFO;CSF1R;ADRA2A;ADRA2C;NEK10;DAXX;DDX3X;EDN1;EFNA1;EGR1;EPHA2;EPHB6;ERBB3;EREG;ERN1;ACSL1;PTK2B;STOX1;FGR;MAPRE3;DKK1;XRCC6;GAS6;ANG;RGCC;HLA-DRB1;HSP90AA1;HSP90AB1;IGF1;CCN1;IL1B;IL18;INSR;IRAK1;AREG;RHOA;LCP2;LEP;LTF;MAP3K5;MET;MIF;NEDD9;NPM1;DDR2;TAOK3;PDGFRA;PPIA;CCDC88A;AXL;GPRC5C;MAP2K1;MAP2K2;MAP2K3;MAP2K6;PRLR;RELN;TCIM;PTP…	3.38505	1e-21
GOBP_TISSUE_MIGRATION	PDCD6;CIB1;CXCL13;GIPC1;CORO1A;FSTL1;LRG1;CSNK2B;CTSH;CYP1B1;DCN;GADD45A;DPP4;AGTR2;EDN1;EFNA1;EGR3;EPHA2;PTK2B;FAT2;FGF7;MACF1;KANK2;GATA2;GLUL;GRN;RGCC;ANXA1;ANXA3;HIF1A;HMGB1;NR4A1;HSPB1;ID1;APOE;ITGA3;ITGB1;JUN;JUP;RHOA;RHOB;TACSTD2;MET;NFE2L2;ATP5F1A;ATP5F1B;ENPP2;SERPINF1;PFN1;PFN2;DNAJA4;MAP2K3;PRKX;LGMN;ADAMTS9;RAB25;RTN4;PTGS2;PTN;RAB13;RAC1;ACTA2;ROCK1;RRAS;S100A2;SNAI2;SOX9;SPARC;STC1;…	3.8757	1.14e-21
GOBP_REGULATION_OF_DNA_BINDING_TRANSCRIPTION_FACTOR_ACTIVITY	TRIB1;CIB1;LAMTOR5;PRDX3;IRAK3;PARK7;PHB2;NLRP3;CARD16;CLU;MTPN;CTNNB1;CYP1B1;COMMD6;EDN1;ESR1;FOXJ1;FLNA;GAS6;NUPR1;ADGRF1;TSSK4;NWD1;RGCC;PYCARD;HCK;HCLS1;ANXA3;ANXA4;HES1;HSPA1A;HSPA1B;ID1;ID2;ID3;IL1B;IL10;IL18;IRAK1;IRAK2;AR;JUP;LTF;ARRB2;MSX2;NFKBIA;NPM1;DDR2;PIM1;PPIA;HES6;MAPK10;RELN;TCEAL7;PSMA6;PELI1;PTCH1;PTGIS;RPS3;S100A8;S100A9;S100A12;SFRP4;SGK1;CLEC7A;SPI1;SRI;STAT3;PRDX2;TFRC;TLR2…	3.51727	1.64e-21
GOBP_RESPONSE_TO_CORTICOSTEROID	FBXO32;COL1A1;ADM;CCN2;CYBA;CYBB;CYP1B1;EDN1;EIF4E;AIF1;A2M;ENG;FOXO3;FOS;FOSB;GJB2;ANXA1;ANXA3;HNRNPU;IGFBP2;IGFBP7;IL1RN;IL10;AREG;RHOA;MDK;MT-ND3;ATP2B1;ATP5F1A;PAM;SERPINF1;PLAT;ERRFI1;POR;DDIT4;PTGDS;PTGS2;BCHE;CCND1;BCL2;RPL27;SCNN1A;SGK1;SLIT3;ZFP36L1;ZFP36L2;STC1;KLF9;TNF;ZFP36;AKR1C3;CFLAR;CLDN1	6.29747	1.86e-21
GOBP_MICROTUBULE_BUNDLE_FORMATION	DNAAF1;CFAP206;DNAAF4;DNAH5;SPAG17;RSPH9;FOXJ1;CLUAP1;CFAP65;SPEF1;GAS8;DNAI1;TEKT2;CFAP157;CFAP47;CCDC39;RSPH4A;CFAP100;DNAAF3;DNAJB13;CFAP73;MAP1B;ZMYND10;TPPP3;HYDIN;CFAP46;CCDC40;MNS1;CFAP44;DNAH7;CC2D2A;RP1;DNAI2;SPAG1;UBE2B;SPAG16;CFAP69;SPEF2;TTC26;CFAP43;DNAL1;CCDC65;RSPH1;TPGS1;DRC1;SPAG6	7.66814	1.89e-21
GOBP_POSITIVE_REGULATION_OF_CELL_DEVELOPMENT	ACTR2;ARPC2;TRIB1;CIB1;FERMT2;TRIOBP;CRABP2;CTNNB1;CUX1;DAB2;FLNA;FN1;MACF1;PLXNB2;GOLGA4;HIF1A;HES1;ID2;ID4;IL1B;IL6ST;ILK;ITGB1;LIF;LIMS1;LRP2;CAPRIN1;MAP1B;MDK;MME;NAP1L1;NEDD9;P4HB;F11R;SERPINF1;PLXNB1;PLXNB3;FAIM;MAP2K1;MAP2K2;RELN;PTN;SHTN1;RAC1;BCL2;RFX3;RHEB;S100A10;CXCL12;CLEC7A;BNC1;NIBAN2;SKIL;SOX10;SPINT1;TGFB1;TGM2;TSPO;TLR2;TNF;TNFRSF1B;TP73;TYROBP;VEGFA;WNT2;CXCR4;METRN;DOCK5;CALR;…	4.28209	2.13e-21
GOBP_REGULATION_OF_CELLULAR_AMIDE_METABOLIC_PROCESS	TOB1;EIF1;EIF1B;RACK1;SPON1;IGF2BP2;TMED2;CIRBP;CLU;MSI2;MTPN;CYP1B1;DAPK1;DDX3X;DIO2;EEF2;EFNA1;EIF4A2;EIF4B;EIF4E;EIF4G2;EIF5;EIF5A;PTK2B;FOXO3;TNRC6B;TUT4;RPL13A;PPP1R15A;PLXNB2;GAPDH;PABPC1;SERP1;LSM1;EIF3K;ANG;COA3;DCPS;MRPL13;ORMDL2;HNRNPU;HSPB1;IFNGR1;IGF1;APOE;IGFBP5;CCN1;EIF3E;RHOA;KRT17;CAPRIN1;NCL;NFE2L2;NPM1;YBX1;PA2G4;RPS27L;PAIP2;NGRN;PDK4;PER1;PKM;POLR2G;PPP1CA;ELP3;RTN4;RBM3;RBM4;…	3.2019	2.38e-21
GOBP_CILIUM_OR_FLAGELLUM_DEPENDENT_CELL_MOTILITY	EFHC1;CFAP54;CFAP52;TEKT4;CFAP206;TTLL9;DEFB1;DNAH5;DNAH6;CFAP221;ENKUR;RSPH9;CFAP65;CATSPERD;CFAP45;DPCD;GAS8;DNAI1;TEKT2;TSSK4;CFAP157;CFAP47;IFT81;DNAJA1;CCDC39;RSPH4A;PLTP;LZTFL1;CFAP46;CCDC40;MNS1;DNAH3;CFAP44;DNAH7;RFX3;KIF9;SORD;TMF1;UBE2B;SPAG16;CFAP69;SPEF2;CFAP43;EFHC2;SLIRP;TEKT1;ROPN1L;CCDC65;DNAH11;TPGS1;DRC1;SPAG6	6.40815	2.4e-21
GOBP_ENTRY_INTO_HOST	IFITM3;SIVA1;IFITM2;CTSB;CTSL;CXADR;CD55;DPP4;EPHA2;FCN1;CDHR3;GAS6;GSN;HLA-DRB1;HMGB1;HSPA1A;HSPA1B;ICAM1;CXCL8;INSR;ITGA5;ITGB1;RPSA;LDLR;LGALS1;LY6E;CD46;MRC1;RNASEK;P4HB;F11R;PLSCR1;AXL;TMPRSS4;PTX3;NECTIN2;SLC3A2;BSG;DYNLT1;TFRC;CXCR4;IFITM1;CAV1;VAMP8;SNX3;NRP1;CH25H;CLDN1;JPT2;XPR1;CD74;CD81	6.40815	2.4e-21
GOBP_ORGANIC_ACID_METABOLIC_PROCESS	AASS;AKR1A1;LYPLA1;ECI2;PTGES3;ALDH1L1;SLC2A6;PARK7;MGLL;ADH1B;ADH5;MDH1B;CRABP2;CYP1B1;CYP4B1;DBI;SLC26A2;ECH1;ECHS1;EDN1;AHCY;ENO1;EPHX1;ETFB;ALDH1A1;FABP5;ACSL1;ACSL3;ACSL4;ALDH1A3;SEPHS2;PTGR1;QPRT;FOLR1;DDAH2;DDAH1;ALOX12;ALOX5AP;SERINC5;MPC2;PNKD;GAPDH;ZBTB20;PHGDH;NUPR1;GCSH;PPA2;GCLC;GCLM;GLS;GLUL;GPD1;GPX4;PYCARD;GSTP1;PYCR2;ANXA1;HAGH;HGD;HIF1A;AOAH;HNMT;APOC1;IDH2;IGF1;IL1B;IDO1;INSIG1…	2.55509	2.75e-21
GOBP_RESPONSE_TO_METAL_ION	PDCD6;PPIF;RASGRP2;TXNIP;AHCYL1;PARK7;CRIP1;S100A16;CYBB;DAXX;NQO1;EDN1;ENDOG;PTK2B;SEC31A;FOS;FOSB;ALOX5AP;CLIC4;GCLC;ANK3;SLC25A24;SLC40A1;HIF1A;ANXA11;HSPA5;IGFBP2;IL1A;AQP3;IMPA2;JUN;JUNB;JUND;MBP;MT1E;MT1F;MT1G;MT1H;MT1M;MT1X;MT2A;MT-CO1;NFE2L2;PAM;ATP5F1D;CUTA;SERPINF1;PLSCR1;PPP1CA;LGMN;B2M;PTGS2;CCND1;BCL2;S100A8;SLC1A1;SOD1;SOD2;SOD3;SORD;BSG;TFRC;THBS1;TSPO;ACTG1;SUMO1;VCAM1;SLC30A1;SLC…	3.92621	2.94e-21
GOBP_RESPONSE_TO_TRANSFORMING_GROWTH_FACTOR_BETA	SPRY1;STUB1;CDKN1C;CITED2;GIPC1;FERMT2;VASN;LRG1;COL1A1;COL1A2;COL3A1;COL4A2;CTSK;DAB2;EDN1;ENG;FBN1;FKBP1A;FOLR1;FOS;FAM89B;MXRA5;HSPA1A;HSPA5;HSP90AB1;ID1;ITGA3;ITGB1;ITGB8;JUN;LIMS1;LTBP1;LTBP2;ARRB2;SMAD5;SMAD9;ZFHX3;DDR2;WNT4;ASPN;C20orf27;HTRA1;PMEPA1;SINHCAF;RBBP4;RBBP7;ROCK1;SDCBP;SFRP1;SKIL;SOX9;SPI1;ZFP36L1;STAT3;ZFP36L2;ZEB1;TGFB1;TGFB1I1;THBS1;WNT2;ZYX;LTBP4;CILP;CAV1;CFLAR;CLDN1;PDCD…	4.47481	3.15e-21
GOBP_MESENCHYMAL_CELL_DIFFERENTIATION	CDH2;PDCD6;SPRY1;CITED2;SEMA6B;SEMA3C;DDX17;PDPN;FERMT2;VASN;LRG1;COL1A1;OSR1;CTNNB1;DAB2;DDX5;JAG1;EDN1;EDNRA;EDNRB;EFNA1;ENG;FLNA;FN1;FOLR1;PDCD4;CRB2;RGCC;HIF1A;HNRNPAB;HES1;IGF1;RBPJ;IL1B;LAMA5;LIMS1;MDK;MSX1;MSX2;WNT4;SEMA3G;RTN4;BCL2;ROCK1;RPS7;S100A4;SDCBP;SFRP1;SFRP2;SNAI2;PHACTR4;SOX9;SOX10;TBX3;TGFB1;TGFB1I1;TWIST1;WNT2;SEMA3B;FUZ;AKNA;NRP1;ALDH1A2;SEMA5A;DLG5;HAND2;CDC42	4.73846	3.26e-21
GOBP_CYTOSKELETON_DEPENDENT_INTRACELLULAR_TRANSPORT	TUBA1B;IFT27;KIF3A;IFT43;LCA5L;LCA5;DYNC1I2;SPAG17;TUBB;CLUAP1;SYNE2;SUN1;TRAF3IP1;IFT172;BLOC1S1;INTU;IFT81;HIF1A;HNRNPU;HSBP1;HSPA8;HSPB1;KIF5B;ARL3;MAP1B;CCDC88C;MYO6;PCM1;HOOK1;DYNC2LI1;HSPB11;FNBP1L;IFT57;CCDC186;ARL8B;CCDC88A;IFT46;IFT80;RPGR;BICD1;MYO1G;SFPQ;IFT22;SOD1;DST;STAU1;UBB;TUBA1A;DYNC2H1;TTC21B;TTC26;IFT74;FUZ;ACTN4;IFT88;UXT;TUBA1C;DYNLL1;BAG3;CDC42	5.31745	3.76e-21
GOBP_POSITIVE_REGULATION_OF_CELLULAR_COMPONENT_BIOGENESIS	PDCD6IP;ACTR2;ARPC2;AKAP9;WASF2;STUB1;RACK1;CXCL13;CDC42EP3;FERMT2;CHGA;PARK7;SYNPO;CLU;COL16A1;CLDN3;CCN2;DDX3X;DPYSL3;EPHA2;CTTN;EPS8;ESR1;PTK2B;PPP1R35;MAPK15;COBL;CHMP2A;GRB2;RGCC;PYCARD;HCK;HSPA1A;HSPA1B;HSP90AA1;ID1;RHOA;RHOC;LCP1;LGALS3;LIMS1;ARL2;MAP1B;MET;MSN;NPHP1;SH3GLB1;ZMYND10;TPPP3;PFN1;PFN2;PIK3R1;STX18;PLEK;WNT4;FNBP1L;RESF1;MNS1;CCDC88A;BRK1;FNIP2;SLAIN2;RAC1;RAC2;RAP1B;ROCK1;RP1…	3.33346	3.97e-21
GOBP_ERK1_AND_ERK2_CASCADE	SPRY1;TNIP1;GPNMB;CIB1;FERMT2;CHI3L1;CAVIN3;PHB2;CSF1R;CCN2;CTSH;NEK10;CNKSR3;DAB2;DDT;DUSP6;GPR183;EDN1;EPHA2;PTK2B;FBLN1;FN1;GAS6;GATA4;GBP1;GNAI2;PYCARD;GSTP1;HLA-DRB1;HMGB1;ICAM1;IGF1;APOE;CCN1;IL1A;IL1B;JUN;LIF;ARRB2;MIF;MYC;ATF3;DDR2;PDGFRA;PLA2G2A;PLA2G5;ERRFI1;MAP2K1;MAP2K2;NDRG2;PTPN1;PTPRC;ACTA2;RAP1A;RAP1B;RRAS;CCL2;CCL3;CCL3L1;CCL4;CCL5;CCL20;CCL21;SOX9;ZFP36L1;ZFP36L2;TGFB1;TIMP3;TNF…	3.98722	4.01e-21
GOBP_REGULATION_OF_EXTRINSIC_APOPTOTIC_SIGNALING_PATHWAY	PARK7;CTNNA1;DDX3X;AGTR2;CTTN;EYA2;GCLC;GCLM;PYCARD;PDIA3;GSTP1;HMGB2;HSPA1A;HSPA1B;ICAM1;IGF1;IL1A;IL1B;ITGA6;AR;LGALS3;LMNA;MCL1;ATF3;G0S2;SERPINE1;TNFRSF12A;PMAIP1;PPP1CA;FAIM;PTPRC;BCL2;BID;SFRP1;SFRP2;DEPTOR;SKIL;BMPR1B;SNAI2;STK4;PRDX2;THBS1;TIMP3;TNF;TNFAIP3;SRPX;CAV1;TNFSF10;NRP1;CFLAR;ARHGEF2	6.46456	4.27e-21
GOBP_PROTEOLYSIS_INVOLVED_IN_PROTEIN_CATABOLIC_PROCESS	PDCD6IP;TRIB1;STUB1;RACK1;CLGN;CTSC;GIPC1;SEC61B;PARK7;GABARAP;GABARAPL2;OMA1;CLU;ANAPC16;PLK3;UBXN10;CTNNB1;CTSB;CTSH;CTSK;CTSL;CTSS;CTSZ;DAB2;DNAAF4;EFNA1;PTK2B;USP12;FBXO21;UBXN4;TRIM2;RYBP;PRAME;CD2AP;HSPBP1;SDF2L1;CDC26;RNF144B;SVIP;ARIH1;RNF19A;NUPR1;CHMP2A;GCLC;UBE2S;RNF149;CHMP4A;MYLIP;ANAPC4;NOP53;HSPA1A;HSPA1B;HSPA5;HSP90AB1;IFI27;APOE;C17orf97;ARRB2;DNAJB9;MDM2;NEDD8;NFE2L2;PCBP2;UBXN1…	2.73877	5.31e-21
GOBP_RESPONSE_TO_TOPOLOGICALLY_INCORRECT_PROTEIN	PIGBOS1;STUB1;RACK1;AGR2;HSPH1;TMED2;DNAJB4;CLU;ERP27;COMP;PACRG;CREB3L4;DAXX;ERN1;UBXN4;TRAM1;PPP1R15A;SDF2L1;HSPB8;SERP1;DNAJA1;HSPA1A;HSPA1B;HSPA5;HSPA6;HSPA8;HSPA9;HSPB1;HSP90AA1;HSP90AB1;HSPD1;HSPE1;DNAJB1;DNAJB9;ATF3;NFE2L2;PIK3R1;DNAJC10;SELENOS;PTPN1;CCND1;TMBIM6;THBS1;XBP1;MANF;PPP1R15B;SERPINH1;MBTPS1;DERL3;EIF2AK3;BAG3;HERPUD1	6.23292	6.25e-21
GOBP_REACTIVE_NITROGEN_SPECIES_METABOLIC_PROCESS	KLF2;CLU;CYP1B1;NQO1;AGTR2;EDN1;AIF1;PTK2B;DDAH2;DDAH1;GCH1;GCHFR;GLA;HBB;HSP90AA1;HSP90AB1;IL1B;IL10;INSR;ARG2;ASL;POR;SELENOS;PTGIS;PTGS2;PTX3;RAC1;CLEC7A;SOD2;TSPO;TLR2;TNF;CYB5B;CAV1;KLF4;CD36;CD47	10.57	6.32e-21
GOBP_PROCESS_UTILIZING_AUTOPHAGIC_MECHANISM	STUB1;DEPP1;PARK7;PHB2;GABARAP;GABARAPL2;CLU;SPATA33;PLK3;DRAM2;SPATA18;CTSD;CTSK;DAPK1;DCN;EEF1A1;EIF4E;EIF4G2;CTTN;ENDOG;C9orf72;ERN1;MAPK15;FOXO1;FOXO3;GABARAPL1;ATP6V1C2;SVIP;GAPDH;GATA4;HSPB8;NUPR1;ABL2;CHMP2A;CHMP4A;SLC25A4;TMEM208;PYCARD;SLC25A5;HIF1A;ANXA7;HMGB1;HSPA8;HSPB1;HSP90AA1;IRF8;IFI16;IL10;IL10RA;ITGB4;LEP;LEPR;MCL1;MET;MAP1LC3C;ATP2A2;FIS1;SH3GLB1;ATP6V1D;UFC1;CHMP5;ATP6V1A;ATP6…	3.15176	6.43e-21
GOBP_MUSCLE_CONTRACTION	AKAP9;MYL9;CHGA;C12orf57;CLIC2;CCDC78;CNN1;COMP;MYL6B;CRYAB;CCN2;ADRA2A;ADRA2C;DES;DSG2;DSP;EDN1;EDNRA;EDNRB;CTTN;ENO1;FLNA;SULF1;GATA4;MYOF;GJA1;GJA5;RANGRF;GSN;NR4A1;HSBP1;HSP90AA1;JUP;KCNE1;ARG2;RHOA;SMAD5;MYH2;MYH11;MYL6;ATP1A1;ATP1B1;ATP2A2;ATP2B1;PDE4B;PKP2;FXYD1;MAP2K3;MAP2K6;PTGER3;PTGS2;ACTA2;RGS2;ROCK1;SCN4A;SCN7A;SMTN;SLC6A8;SOD1;SRI;STC1;TBX3;TNF;TPM1;TPM2;TPM3;TPM4;SUMO1;UTRN;CXCR4;C…	3.94252	7.08e-21
GOBP_REGULATION_OF_SYSTEM_PROCESS	AKAP9;MYL9;CELF2;CTSC;KDM5B;CHGA;C12orf57;MGLL;FBXO32;CLIC2;CNN1;ADM;MTPN;CCN2;ADRA2A;ADRA2C;IGSF11;CXADR;CYBA;DAB2;DES;DSG2;DSP;AGTR2;EDN1;EDNRA;EDNRB;AIF1;CTTN;ENO1;FABP5;PTK2B;PI16;FOXO1;FOXO3;FLNA;TMEM98;GAS6;GATA4;GCH1;GJA1;GJA5;GLS;GNAI2;RANGRF;LMCD1;NR4A1;HSP90AA1;IGF1;APOE;IGFBP5;IL1A;IL6ST;IL10;ITGAX;JARID2;JUP;KCNE1;RHOA;LEP;LMNA;MDM2;MMP2;ATP1A1;ATP1B1;ATP2A2;ATP2B1;SHANK1;PDE4B;PKP2;F…	3.06788	7.31e-21
GOBP_REGULATION_OF_BINDING	MRLN;CDKN1A;STUB1;RACK1;SPON1;LAMTOR5;PARK7;CARD16;CTHRC1;CLIC2;CSNK2B;CTNNB1;EFHB;CTSZ;ADRB3;DAB2;TLE5;C9orf72;FKBP1A;MAPRE3;DKK1;SPAG8;GAS8;ANXA2;HMGB1;HMGB2;HES1;HSP90AB1;ID1;IFI16;IGF1;APOE;IL10;EIF3E;JUN;STMN1;LIF;C4orf3;LRP1;LRPAP1;ARRB2;MET;MSX1;MSX2;NFKBIA;NME1;ATP2A2;ZNF593;GMNN;PLAUR;PPP1CA;B2M;PTPRF;RAN;ACTB;ROCK1;RPL11;S100A10;NUCKS1;NIBAN2;SLPI;SORL1;SRI;STK4;TMBIM6;TGFB1;TMSB4X;PHLD…	3.80847	8.23e-21
GOBP_RESPONSE_TO_TEMPERATURE_STIMULUS	PDCD6;DNAJB6;STUB1;DNAJB4;CIRBP;HSPB6;ADM;CRYAB;ADRB3;DAXX;DIO2;TFEC;FOXO1;FOS;CHORDC1;GCLC;GMPR;HSBP1;DNAJA1;HSPA1A;HSPA1B;HSPA6;HSPB1;HSP90AA1;HSP90AB1;HSPD1;DNAJB1;IGF1;IGFBP7;IL1A;IRAK1;LPL;ARRB2;MT-CO2;NFKBIA;ATP2B1;IER5;PLIN1;DNAJA4;TCIM;LXN;PTGS2;RBBP7;CXCL12;SOD1;SOD2;THBS1;SUMO1;UCP2;YWHAE;CXCR4;LRP11;CD14;EIF2AK3;BAG3;ZNF516	5.64065	8.41e-21
GOBP_NEGATIVE_REGULATION_OF_PHOSPHORUS_METABOLIC_PROCESS	HIPK3;TRIB1;SPRY1;CDKN1A;CDKN1C;RACK1;CIB1;HEXIM1;PRDX3;TMED2;PKIG;IRAK3;PARK7;PPP1R36;CNKSR3;GADD45A;DUSP1;DUSP6;ENG;C9orf72;FBLN1;PPP1R35;FKBP1A;DKK1;PPP1R15A;TRAF3IP1;NUPR1;CHORDC1;PDCD4;GNAI2;SFN;H19;PYCARD;GSTP1;HMGCR;HNRNPU;DNAJA1;HSPB1;APOC1;APOE;IGFBP3;IL1B;JUN;LGALS3;LRP1;ARRB2;MLLT1;GADD45B;NPM1;DDR2;FIS1;RTRAF;PLEK;ERRFI1;DNAJC10;DDIT4;PARP14;PPIA;PPP2R5A;PRKAR1A;PMEPA1;HEG1;PTPN1;PTPR…	3.50118	8.79e-21
GOBP_MESENCHYME_DEVELOPMENT	CDH2;PDCD6;SPRY1;CITED2;BASP1;SEMA6B;SEMA3C;DDX17;PDPN;FERMT2;VASN;LRG1;COL1A1;OSR1;CTNNB1;DAB2;DDX5;JAG1;EDN1;EDNRA;EDNRB;EFNA1;ENG;ERBB3;FLNA;FN1;FOLR1;GATA4;PDCD4;CRB2;RGCC;HIF1A;HNRNPAB;HES1;IGF1;RBPJ;IL1B;LAMA5;LIMS1;MDK;MDM2;MSX1;MSX2;MYC;WNT4;BNC2;SEMA3G;RTN4;ACTA2;BCL2;ROCK1;RPS7;S100A4;SDCBP;SFRP1;SFRP2;SNAI2;PHACTR4;SOX9;SOX10;ZFP36L1;TBX3;TGFB1;TGFB1I1;TWIST1;WNT2;SEMA3B;FUZ;AKNA;NRP1;…	4.15604	8.91e-21
GOBP_CELL_DIVISION	PDCD6IP;ACTR2;CDK2AP2;CCNO;TUBA1B;RACK1;CIB1;SMC2;TXNIP;CETN2;CFL1;NUDC;GIPC1;CNTRL;TRIOBP;EFHC1;CKS2;ANAPC16;CLTA;PLK3;CENPX;TUBB;EPB41L2;EREG;EVI2B;STOX1;FGF7;MAPRE3;PDS5B;ITGB3BP;CD2AP;CDC26;INTU;CHMP2A;UBE2S;GNAI2;SFN;ANK3;CHMP4A;ANAPC4;ANXA11;HNRNPU;DCDC1;IL1A;IL1B;ARF1;KIF2A;RHOA;RHOB;RHOC;STMN1;LLGL2;ARL3;MAP4;MDK;MYC;MYH10;SEPTIN2;NEDD9;NEK1;YBX1;OSM;SH3GLB1;ANAPC5;CHMP5;ANAPC11;PPP1CA;PP…	2.96816	9.53e-21
GOBP_HEART_MORPHOGENESIS	SPRY1;CITED2;SEMA3C;TMED2;DNAAF1;COL5A1;COL11A1;CPE;CTNNB1;JAG1;DSP;EDN1;EDNRA;EFNA1;ELN;ENG;FKBP1A;DKK1;CLUAP1;FLNA;FOLR1;IFT172;GATA4;GATA6;GJA5;PDCD4;GNG5;HIF1A;HES1;CCDC39;CCN1;RBPJ;IHH;ILK;INSR;JUN;LRP2;MDM2;MSX1;MSX2;PIM1;PKP2;AHI1;CCDC40;IFT57;RTN4;PTCH1;HEG1;SFRP2;SOX17;SLIT3;SNAI2;SOX4;SOX9;TBX3;TGFB1;TPM1;TWIST1;VEGFA;WNT2;DNAH11;NRP1;ALDH1A2;DHRS3;HAND2;ADAMTS1;CDC42	4.61451	1.03e-20
GOBP_REGULATION_OF_PROTEIN_SERINE_THREONINE_KINASE_ACTIVITY	CD24;HIPK3;TRIB1;SPRY1;CDKN1A;CDKN1C;CCNO;CIB1;HEXIM1;ERP29;FERMT2;CCNI;PKIG;IRAK3;AKAP13;CKS2;CSF1R;ADRA2A;NEK10;DAB2;GADD45A;DDX3X;DUSP1;EDN1;ERN1;ACSL1;PTK2B;MAPRE3;DKK1;CHORDC1;PDCD4;SFN;RGCC;PYCARD;GSTP1;SERTAD1;HMGCR;DNAJA1;HSP90AB1;APOE;IL1B;INSR;IRAK1;RHOA;LTF;MAP3K5;MIF;MST1;TAOK3;PRKAR1A;MAP2K1;MAP2K2;MAP2K6;TCIM;CCNL1;HEG1;PTPN1;PTPRC;CCND1;RGS2;ACTB;RPS3;S100A12;SFRP1;SFRP2;BMPR1B;SOR…	3.66886	1.26e-20
GOBP_POSITIVE_REGULATION_OF_CELL_SUBSTRATE_ADHESION	ARPC2;CIB1;AGR2;FERMT2;TRIOBP;COL8A1;COL16A1;CCDC80;DAB2;PTK2B;FBLN2;FLNA;FN1;ABI3BP;EFEMP2;CCN1;ILK;ITGA3;ITGA5;JUP;LIMS1;ARL2;MDK;NEDD9;NID1;P4HB;WNT4;RAC1;ROCK1;RRAS;S100A10;CCL21;SDC4;SFRP1;STK4;THY1;UTRN;VEGFA;DOCK5;CALR;NRP1;MYADM;CD36;SPOCK2;CDC42	7.40503	1.43e-20
GOBP_CELL_PART_MORPHOGENESIS	CDH2;CDH11;ACTR2;WASF2;TUBB3;SEMA6B;SEMA3C;PDLIM5;PDPN;CFL1;C12orf57;EMB;CRABP2;CSF1R;CTNNB1;CUX1;ARX;DLX5;DPYSL2;EDN1;EDNRA;EFNA1;EPHA2;CTTN;C9orf72;EPHB6;ALCAM;PHACTR1;PALLD;EPB41L3;ARC;COBL;FN1;MACF1;PLXNB2;GFRA3;GOLGA4;ANK3;HSP90AA1;HSP90AB1;APLP2;ID1;IFRD1;APOE;ITGB1;KIF5B;RHOA;LAMA5;LAMC2;STMN1;LRP2;CAPRIN1;MAP1B;MBP;MDK;NBL1;NFIB;NR4A2;SHANK1;FIS1;TAOK3;DCDC2;ENPP2;PLXNB1;PLXNB3;ENAH;MAP2K…	2.90122	1.48e-20
GOBP_INTEGRIN_MEDIATED_SIGNALING_PATHWAY	FERMT2;COL3A1;COL16A1;CCN2;CTNNA1;DAB2;PTK2B;FBLN1;FGR;FLNA;FN1;FYB1;HCK;ILK;ITGA6;ITGA3;ITGA5;ITGAM;ITGAX;ITGB1;ITGB2;ITGB4;ITGB8;LAMA5;LAMB1;LIMS1;NEDD9;NID1;NME2;PLEK;PTN;PHACTR4;DST;THY1;TIMP1;TLN1;ZYX;PLPP3;NRP1;ADAMTS1;CD47;CD63;CDC42	7.85859	1.84e-20
GOBP_LEUKOCYTE_PROLIFERATION	CD24;CDKN1A;LILRB2;GPNMB;CEBPB;CORO1A;CLU;CSF1R;CSF2RA;CTNNB1;CD55;GPR183;AHR;AIF1;GAPT;FOXJ1;CADM1;PYCARD;GSTP1;ANXA1;HLA-A;HLA-DMB;HLA-DPA1;HLA-DPB1;HLA-DRB1;HLA-E;HMGB1;HES1;HSPD1;IGF1;IGFBP2;IHH;IL1A;IL1B;IL6ST;IL7R;IL10;IL18;IDO1;IRF1;JUNB;ARG2;LEP;LGALS3;CD46;MIF;MNDA;MSN;PNP;PAWR;WNT4;PRKAR1A;PRLR;PELI1;PTPRC;SELENOK;RAC2;BCL2;RPS3;RPS6;CCL5;BID;SDC4;VSIR;SLC11A1;BST2;PRDX2;TFRC;TNFAIP3;TN…	3.90568	1.93e-20
GOBP_CELLULAR_COMPONENT_DISASSEMBLY	CIB1;PDPN;CFL1;BLCAP;DSTN;TRIOBP;ADAMTS5;PLAAT3;IRAK3;PARK7;PHB2;GABARAP;GABARAPL2;ADD3;PLIN2;SPATA33;PLK3;PLEKHH2;SPATA18;MTPN;CST3;CTSK;CTSS;DPP4;EIF5A;CTTN;ENDOG;EPS8;DKK1;GABARAPL1;SPEF1;CHMP2A;CHMP4A;SLC25A4;SLC25A5;GSN;HIF1A;HMGA1;HSPA8;INSR;ITGAM;KIF2A;KIF5B;STMN1;LCP1;STMND1;LRP1;MAP1B;MMP2;MMP7;MMP11;MMP14;MAP1LC3C;MYC;NEDD9;ATP2A2;DDR2;FIS1;LIMA1;UFC1;CHMP5;PIK3R1;PLEK;RETREG1;DDIT4;TOM…	3.31409	2.09e-20
GOBP_NEGATIVE_REGULATION_OF_GROWTH	CDKN1A;CITED2;RACK1;SEMA6B;SEMA3C;CCDC85B;DCBLD2;CRYAB;CXADR;ADRB3;DAB2;DDX3X;AGTR2;ENO1;PI16;WWC1;GJA1;GPC3;HIF1A;HSPA1A;HSPA1B;IFRD1;IGFBP5;JARID2;MSX1;MT1E;MT1F;MT1G;MT1H;MT1M;MT1X;MT2A;NDUFA13;PPT1;MEG3;LGMN;TMPRSS4;SEMA3G;RTN4;PTCH1;PTPRS;RBBP7;BCL2;RGS2;RGS4;TSPYL2;SFRP1;SFRP2;SOX17;SLIT3;SPP1;STK4;BST2;BTG1;TGFB1;TP73;SEMA3B;RERG;NRP1;SOCS2;SEMA5A;SPAG9;SCGB3A1;GDF15;CDH1	4.66924	2.31e-20
GOBP_MONONUCLEAR_CELL_DIFFERENTIATION	LILRB2;CEBPB;FGL2;KDELR1;NLRP3;KLF6;CSF1R;CTNNB1;CTSK;CTSL;GPR183;EGR1;EGR3;PTK2B;FCER1G;ZBTB1;FOXJ1;FOXO3;FOS;XRCC6;TMEM98;GAS6;CLEC4E;PRELID1;GPS2;TMEM176B;SLC25A5;ANXA1;HLA-B;HLA-DRA;HLA-DRB1;HMGB1;IRF8;ID2;IFI16;RBPJ;IHH;IL1A;IL1B;IL7R;IL10;IRF2BP2;IL18;IRF1;ITGB1;ITGB8;JUN;JUNB;RHOA;LEP;LEPR;LGALS1;LGALS3;CD46;DNAJB9;MDK;MMP14;MT1G;MYC;NFIL3;PNP;PBX1;PIK3R1;WNT4;POU2AF1;AXL;B2M;PTPRC;BCL2;AC…	3.3389	3.28e-20
GOBP_NEGATIVE_REGULATION_OF_INTRINSIC_APOPTOTIC_SIGNALING_PATHWAY	PPIF;IVNS1ABP;PARK7;CLU;DDX3X;ENO1;HIF1A;DNAJA1;HSPA1A;HSPB1;MCL1;MDM2;MIF;MUC1;NFE2L2;RRM2B;NDUFA13;PLAUR;PPIA;USP47;SELENOS;PTGS2;PTPN1;BCL2;BID;CXCL12;SFRP2;SNAI2;SOD2;TMBIM6;TPT1;VDAC2;XBP1;PTTG1IP;NME5;YBX3;ARHGEF2;CD44;HERPUD1;CD74	8.62275	3.32e-20
GOBP_POSITIVE_REGULATION_OF_EPITHELIAL_CELL_PROLIFERATION	PDCD6;KDM5B;OSR2;LRG1;JAML;OSR1;CTNNB1;CYBA;DLX5;ECM1;EGR3;F3;FGF7;GATA2;B4GALT1;GLUL;ANG;NEAT1;GRN;HIF1A;HMGB1;HMGB2;NR4A1;ID1;IGF1;RBPJ;IHH;IL10;AR;JUN;AREG;LAMB1;MDK;MYC;NME1;NME2;PLXNB3;MYDGF;HTRA1;RTN4;PTN;CCND1;CXCL12;SFRP1;SOX9;STAT3;TGM1;TNF;TNFAIP3;C5AR1;TWIST1;VEGFA;WNT2;XBP1;NR4A3;IRS2;NRP1;CFLAR;SEMA5A;CLDN1;CDC42	4.94247	3.36e-20
GOBP_CELLULAR_RESPONSE_TO_REACTIVE_OXYGEN_SPECIES	PPIF;NET1;KLF2;RACK1;FBLN5;PRDX3;PARK7;ROMO1;CYP1B1;NQO1;EDN1;ENDOG;ERN1;FOXO3;KDM6B;FOS;PRDX5;GCH1;H19;ANXA1;APEX1;IL10;JUN;RHOB;MAP3K5;MET;MMP2;NFE2L2;DDR2;PRDX1;PAWR;OSER1;PDGFRA;AXL;PLEKHA1;RPS3;SOD1;SOD2;SOD3;PRDX2;TNFAIP3;TPM1;TXN;NR4A3;MAP1LC3A;CAT;AKR1C3;SPHK1;CD36	6.39182	3.56e-20
GOBP_POSITIVE_REGULATION_OF_PROTEIN_LOCALIZATION	RACK1;CIB1;LAMTOR5;AGR2;SORBS1;FERMT2;PARK7;SLC51B;PLK3;EPHA2;EPB41L2;ACSL3;ACSL4;FLNA;CD2AP;MPC2;GAS6;GAS8;SERP1;GLUL;SFN;ANG;ANK3;RANGRF;HCLS1;HIF1A;HLA-DRB1;HSP90AA1;HSP90AB1;IGF1;IL1A;IL1B;ITGA3;ITGAM;ITGB1;ITGB2;JUP;KIF5B;LEP;LGALS3;LIF;LRP1;MSN;MYH10;NEDD9;NPM1;OAZ1;FIS1;PCM1;SH3GLB1;ERGIC3;PIK3R1;TOMM7;LEPROT;PPIA;PPID;CCDC88A;VPS35;RTN4;PTGS2;RHOU;RAC2;RAN;UBL5;BICD1;SLC5A3;SORL1;SOX4;SPT…	3.4124	3.7e-20
GOBP_CELL_CELL_SIGNALING_BY_WNT	CDH2;CD24;RACK1;RUVBL2;FERMT2;CTHRC1;COL1A1;CPE;CSNK2B;APCDD1;CTNNB1;CTNND1;DAB2;DDX3X;TLE5;DLX5;EDN1;EDNRA;EDNRB;EGR1;DKK1;FOXO1;FOXO3;SULF1;FOLR1;MACF1;ATP6V1C2;CBY1;SPEF1;GPC3;RBMS3;TAX1BP3;HIC1;APOE;IGFBP1;IGFBP2;IGFBP4;IGFBP6;RBPJ;ILK;ITGA3;JUP;RHOA;LRP1;MDK;MITF;CCDC88C;NFKB1;NR4A2;DCDC2;PFDN5;ATP6V0C;WNT4;PPP1CA;USP47;LGR4;VPS35;NDRG2;IFT80;RAC1;CCND1;RPS12;SFRP1;SFRP2;SFRP4;SOX17;SNAI2;SO…	3.38387	3.76e-20
GOBP_NEGATIVE_REGULATION_OF_RESPONSE_TO_EXTERNAL_STIMULUS	TRIB1;SEMA6B;SEMA3C;CXCL13;FGL2;IRAK3;NLRP3;CARD16;CLDN3;DDT;DPP4;DUSP1;EDN1;AIF1;A2M;FGR;ALOX12;SAMHD1;TRAF3IP1;GPR17;GPS2;GRN;GSTP1;ANXA2;HCK;HLA-A;HLA-B;HLA-DRB1;AOAH;HLA-E;IFI16;IGF1;APOE;IL10;ARG2;LDLR;LEP;LTF;ARRB2;MDK;MIF;NBL1;NFKB1;NT5E;NUCB2;SERPINE1;SERPINB2;PCBP2;PDGFRA;SERPINF1;SERPINB9;PLAT;PLAUR;WNT4;PARP14;VPS35;SELENOS;HTRA1;MMP26;PSMA1;SEMA3G;PTGIS;PTPRC;PTPRS;RPS19;SAA1;CCL2;SEC…	3.46281	4.13e-20
GOBP_EXTRACELLULAR_TRANSPORT	DNAAF1;CFAP54;NEK10;DNAAF4;DNAH5;DNAH9;SPAG17;CFAP221;CFAP53;CFAP45;DPCD;GAS8;DNAI1;CCDC39;SPA17;CCDC40;KIF27;RFX3;SPAG16;SPEF2;CFAP43;NME5;ROPN1L;OFD1;DNAH11;SLC9A3R1;SPAG6	19.6679	4.9e-20
GOBP_MYELOID_CELL_DIFFERENTIATION	WASF2;TRIB1;KLF2;CITED2;CEBPB;CIB1;PRDX3;CSF1R;CSF3R;CTNNB1;JAG1;GPR183;EPHA2;ALAS2;EVI2B;PTK2B;FBN1;FOXO3;FLNA;FOS;GATA2;GPC3;SLC25A5;ANXA2;HCLS1;HIF1A;HLA-DRB1;HMGB2;HOXB7;PRMT1;HSPA1A;HSPA1B;HSPA9;IRF8;ID2;IFI16;RBPJ;ITGB8;JUN;JUNB;LIF;LTF;SMAD5;MAF;MEIS2;MITF;RHEX;MT1G;MYC;NEDD9;NFKBIA;TMEM14C;PIK3R1;P4HTM;TET2;KMT2E;PRKX;B2M;RPS6;RPS14;RPS19;CCL3;SFRP1;SPI1;ZFP36L1;STAT3;TFRC;TGFB1;KLF10;TLR…	3.56491	5.78e-20
GOBP_POSITIVE_REGULATION_OF_PROTEIN_KINASE_ACTIVITY	CD24;CDKN1A;CIB1;ERP29;FERMT2;CHI3L1;AKAP13;PARK7;PHB2;CKS2;CLU;CSF1R;ADRA2A;ADRA2C;NEK10;DAXX;DDX3X;EDN1;EFNA1;EGR1;ERBB3;EREG;ERN1;ACSL1;PTK2B;STOX1;MAPRE3;DKK1;XRCC6;GAS6;ANG;RGCC;HSP90AA1;HSP90AB1;IGF1;CCN1;IL1B;IL18;INSR;IRAK1;AREG;RHOA;LCP2;LEP;LTF;MAP3K5;MIF;NEDD9;NPM1;DDR2;TAOK3;PPIA;CCDC88A;GPRC5C;MAP2K1;MAP2K2;MAP2K3;MAP2K6;PRLR;RELN;TCIM;PTPN1;PTPRC;RAP1A;CCND1;RPLP1;RPS3;S100A12;CCL5;…	3.49601	6.29e-20
GOBP_REPRODUCTIVE_SYSTEM_DEVELOPMENT	CITED2;BASP1;CEBPB;PRDX4;KDM5B;OSR1;CRIP1;CTNNA1;CTNNB1;CYP1B1;A2M;EREG;ESR1;FOXO3;SULF1;NR5A1;TIPARP;GATA4;GATA6;NUPR1;ANG;ANXA1;HMGB2;HOXA10;HSPA5;ID4;IL1A;INSR;AR;KCNE1;LEP;LRP2;ARRB2;MMP2;MMP14;NASP;PDGFRA;SERPINF1;PGR;WNT4;PLEKHA5;LGR4;AXL;PRLR;PSAP;PTCH1;PTX3;RAB13;PLEKHA1;CCND1;BCL2;SFRP1;SFRP2;BMPR1B;SLIT3;SOD1;SOX9;TBX3;NR2F2;TMF1;TNFAIP6;C3;UBB;VEGFA;WDR77;NCOA4;ARID5B;YBX3;AKR1C3;TNFSF…	4.07693	6.96e-20
GOBP_MOTILE_CILIUM_ASSEMBLY	DNAAF1;CFAP54;CFAP206;SPAG17;CFAP221;RSPH9;FOXJ1;CFAP65;INTU;CFAP157;CFAP47;IFT81;CCDC39;DNAAF3;ZMYND10;SPATA6;AHI1;CCDC40;IFT57;MNS1;CFAP44;CC2D2A;UBE2B;SPAG16;CFAP69;SPEF2;BBOF1;CFAP43;DYNLL1;TPGS1;SPAG6	13.5572	7.1e-20
GOBP_REGULATION_OF_LEUKOCYTE_PROLIFERATION	CD24;CDKN1A;LILRB2;GPNMB;CEBPB;CORO1A;CSF1R;CSF2RA;CTNNB1;CD55;GPR183;AHR;AIF1;FOXJ1;PYCARD;GSTP1;ANXA1;HLA-A;HLA-DMB;HLA-DPA1;HLA-DPB1;HLA-DRB1;HLA-E;HMGB1;HES1;IGF1;IGFBP2;IHH;IL1A;IL1B;IL6ST;IL10;IL18;IDO1;IRF1;ARG2;LEP;LGALS3;CD46;MIF;MNDA;PNP;PAWR;PRKAR1A;PRLR;PELI1;PTPRC;SELENOK;RAC2;BCL2;RPS3;CCL5;BID;SDC4;VSIR;BST2;TFRC;TNFAIP3;TNFRSF1B;TYROBP;VCAM1;LST1;RASSF5;IRS2;DLG5;CD74;CD81	4.40697	7.57e-20
GOBP_REGULATION_OF_INFLAMMATORY_RESPONSE	TNIP1;CEBPB;CTSC;PARK7;MGLL;NLRP3;C2CD4A;DDT;EDNRB;ESR1;FGR;ALOX5AP;NUPR1;PDCD4;NEAT1;GPR17;GPS2;GPX4;GRN;PYCARD;GSTP1;ANXA1;HCK;HLA-DRB1;AOAH;HLA-E;BIRC3;IGF1;APOE;IL1B;IL1R1;IL6ST;IL10;IL18;IDO1;C2CD4B;LDLR;LGALS1;LGALS2;LPL;MDK;MGST2;NDUFC2;NFKB1;NFKBIA;NINJ1;NT5E;OSM;SERPINE1;SERPINF1;PLA2G2A;VPS35;SELENOS;MMP26;PSMA1;PSMA6;PTGER3;PTGIS;PTGS2;PTPRC;RPS19;S100A8;S100A9;S100A12;SAA1;CCL3;CCL5;G…	3.50808	8.39e-20
GOBP_IMMUNE_RESPONSE_REGULATING_CELL_SURFACE_RECEPTOR_SIGNALING_PATHWAY	CD24;IGHV1-69D;LILRB2;BTNL9;ELF1;FCER1G;FCN1;FGR;FPR1;FYB1;CLEC4E;GBP1;IGHV6-1;IGHV5-51;IGHV4-61;IGHV4-59;IGHV4-39;IGHV4-34;IGHV4-4;IGHV3-74;IGHV3-53;IGHV3-49;IGHV3-48;IGHV3-33;IGHV3-30;IGHV3-23;IGHV3-21;IGHV3-20;IGHV3-15;IGHV3-13;IGHV3-11;IGHV3-7;IGHV2-5;IGHV1-18;IGHV1-3;GPS2;PHPT1;HCK;HLA-A;HLA-DPB1;HLA-DQB1;HLA-DRB1;IGHA1;IGHA2;IGHG1;IGHG2;IGHG4;IGHM;IGKC;LCP2;LGALS3;MNDA;PAWR;PDE4B;PIGR;PLSCR…	3.91535	8.71e-20
GOBP_RESPONSE_TO_XENOBIOTIC_STIMULUS	CCNO;SEMA3C;TXNIP;ADCYAP1R1;PLIN2;COL1A1;CRYZ;CTNNB1;CYBA;CYBB;CYP1B1;DAD1;NQO1;DUSP6;EDN1;AHR;EMX2;ENG;EPHX1;ACSL1;PTK2B;FOXO3;FOS;FOSB;GAS6;GATA4;GATA6;GCLC;GCLM;RNF149;GSTA3;GSTM3;GSTP1;GUK1;AOX1;APEX1;HSPA5;HSP90AA1;HSP90AB1;IGFBP2;IL1B;IL10;ITGA3;JUN;RHOA;LPL;MAP1B;MDK;MGMT;MMP2;MYC;ATP1A1;NFE2L2;NNMT;PNP;PAM;PDE4A;PDE4B;POR;USP47;MAP2K6;PTCH1;PTGS2;BCHE;CCND1;BCL2;S100A12;SFRP1;SFRP2;SLC1A1…	3.44333	8.93e-20
GOBP_STEM_CELL_DIFFERENTIATION	CDH2;PDCD6;CITED2;N4BP2L2;SEMA6B;SEMA3C;MSI2;OSR1;CTNNB1;JAG1;EDN1;EDNRA;EDNRB;A2M;ENG;ESR1;FN1;FOLR1;GATA4;GATA6;HIF1A;HNRNPU;HES1;HSPA9;RBPJ;ITGB1;JARID2;LAMA5;LIF;TACSTD2;EPCAM;MSX1;MSX2;NFE2L2;OSM;PDGFRA;OCIAD1;SEMA3G;PTN;PTPRC;RBBP4;RBBP7;BCL2;RPS7;SFRP1;SFRP2;SOX17;SNAI2;PHACTR4;SOX9;SOX10;STAT3;ZFP36L2;TBX3;HNF1B;TWIST1;ZFP36;SEMA3B;LBH;NRP1;ALDH1A2;SEMA5A;HAND2;CDC42	4.57095	1.08e-19
GOBP_MITOCHONDRIAL_RESPIRATORY_CHAIN_COMPLEX_ASSEMBLY	PET100;COX17;OMA1;COX20;NDUFA11;SAMM50;NDUFAF8;COA3;NDUFS7;MT-ND1;MT-ND2;MT-ND4;MT-ND5;MT-ND6;NDUFA1;NDUFA2;NDUFA3;NDUFA5;NDUFA8;NDUFAB1;NDUFB1;NDUFB2;NDUFB3;NDUFB4;NDUFB5;NDUFB6;NDUFB7;NDUFB8;NDUFB9;NDUFC1;NDUFC2;NDUFS5;NDUFA13;NDUFB11;NDUFA12;SDHAF3;UQCC3;COX14;DMAC1	8.54467	1.22e-19
GOBP_RNA_SPLICING	MBNL2;SRRM1;SAP18;DDX17;IVNS1ABP;CELF2;CIRBP;CLK1;CLNS1A;DDX5;ERN1;HNRNPA3;SF3B1;SRRM2;LSM5;FUS;LSM4;SYF2;PABPC1;LSM1;LSM3;RBMX;DCPS;TRA2A;HNRNPA1;HNRNPA2B1;HNRNPC;HNRNPF;HNRNPH1;HNRNPH2;HNRNPH3;HNRNPK;HNRNPU;PRMT1;HSPA1A;HSPA8;IK;LGALS3;MBNL1;NCL;SNU13;NPM1;YBX1;RTRAF;SF3B6;LSM7;LUC7L3;PIK3R1;PNN;SLC38A2;RBM38;CCNL1;RBM25;UBL5;RBM3;RBM4;RPS13;RPS26;SFPQ;SRSF2;SRSF3;SRSF5;SRSF7;TRA2B;SNRPB;SNRPB2…	3.31063	1.28e-19
GOBP_REGULATION_OF_CELLULAR_COMPONENT_SIZE	ARPC5;ARPC3;ARPC1B;ARPC2;SEMA6B;SEMA3C;LAMTOR5;CDC42EP3;DSTN;TRIOBP;CORO1A;TMEM123;AP2M1;ADD3;CLNS1A;PLEKHH2;MTPN;CRABP2;DPYSL2;EDN1;ELN;CTTN;EPS8;PTK2B;FN1;COTL1;MACF1;PPP1R15A;BLOC1S1;GOLGA4;GRB2;PYCARD;GSN;HCK;HCLS1;HSP90AA1;HSP90AB1;IFRD1;APOE;IL7R;RHOA;LAMTOR4;MAP1B;MSN;NPM1;HP1BP3;LIMA1;PFN1;PFN2;PLEK;PPP1CA;BRK1;SEMA3G;RTN4;TWF1;SHTN1;PTPRS;RAC1;CCL21;CXCL12;DEPTOR;SPP1;SPTBN1;SPTBN2;TMSB4…	3.70609	1.55e-19
GOBP_REGULATION_OF_RNA_SPLICING	MBNL2;SRRM1;SAP18;DDX17;CELF2;CIRBP;CLK1;CLNS1A;DDX5;ERN1;FUS;RBMX;TRA2A;HNRNPA1;HNRNPA2B1;HNRNPF;HNRNPH1;HNRNPH2;HNRNPH3;HNRNPK;HNRNPU;HSPA1A;HSPA8;MBNL1;NCL;NPM1;PIK3R1;SLC38A2;RBM38;CCNL1;RBM25;RBM3;RBM4;RPS13;RPS26;SRSF2;SRSF3;SRSF5;SRSF7;TRA2B;SON;TMBIM6;AHNAK;WDR77;FXR1;SF3B5;SRSF9;QKI;RBM39;PRDX6;WTAP;RBM8A;PTBP3	5.54564	1.61e-19
GOBP_CELLULAR_RESPONSE_TO_OXYGEN_LEVELS	STUB1;CITED2;PHB2;CARD16;VASN;PLK3;CYBB;EDN1;EGR1;ENDOG;ENO1;STOX1;FOXO1;FOXO3;FOS;DDAH1;GATA6;FAM162A;RGCC;NOP53;HIF1A;RBPJ;AQP3;IRAK1;JUND;MALAT1;LMNA;MDM2;MYC;NFE2L2;DDR2;P4HB;HP1BP3;CHCHD2;ATP6V1A;PGK1;PMAIP1;PTGIS;PTGS2;BCL2;SFRP1;BNIP3L;ZFP36L1;STC1;TMBIM6;TWIST1;VEGFA;CPEB4;CAV1;CFLAR;ATP6V0D1;ATP6V1G1	5.66454	1.68e-19
GOBP_REGULATION_OF_LEUKOCYTE_MIGRATION	CXCL13;CORO1A;CSF1R;DDT;DPP4;DUSP1;ECM1;EDN1;AIF1;PTK2B;PLCB1;GAS6;GCNT1;ABL2;PYCARD;ANXA1;HMGB1;ICAM1;APOD;IL1A;IL1R1;CXCL8;RHOA;LGALS3;MDK;CD99;MIF;MMP14;MSN;NBL1;NEDD9;SERPINE1;PIK3R1;LGMN;S100A14;PTN;SELENOK;RAC1;RAC2;RARRES2;CCL2;CCL3;CCL4;CCL5;CCL20;CCL21;CXCL12;GPSM3;SPI1;THBS1;THY1;TNF;TNFAIP6;C3AR1;C5AR1;VEGFA;CALR;CD9;CD47;CD74;CD81	4.73815	1.8e-19
GOBP_CELLULAR_OXIDANT_DETOXIFICATION	FBLN5;PRDX4;PRDX3;PARK7;CLIC2;NQO1;ALOX5AP;PRDX5;GCH1;H19;GPX3;GPX4;GSTP1;HBA1;HBA2;HBB;HP;APOE;GSTK1;MGST1;MGST2;MGST3;NFE2L2;PRDX1;SELENOS;PTGS2;S100A9;SELENOW;SOD1;SOD2;SOD3;PRDX2;TXN;PXDN;PRXL2A;CAT;TXNDC17;CD36;PRDX6	8.40431	1.87e-19
GOBP_REGULATION_OF_CELLULAR_RESPONSE_TO_GROWTH_FACTOR_STIMULUS	PDCD6;TOB1;SPRY1;STUB1;CDKN1C;CITED2;CXCL13;GIPC1;FSTL1;VASN;LRG1;CTNNB1;DAB2;DCN;AGTR2;ENG;FBN1;FKBP1A;DKK1;SULF1;FOLR1;TSPAN12;FAM89B;GATA4;GATA6;GPC3;CRB2;HIF1A;HES1;HSPA1A;HSPA5;HSP90AB1;CCN1;RBPJ;IL1B;ILK;ITGA3;ITGA5;LRP2;LTBP1;MSX1;MSX2;NBL1;CRIM1;WNT4;ASPN;C20orf27;HTRA1;PMEPA1;PTPN1;SINHCAF;RBBP4;RBBP7;SDCBP;SFRP1;SFRP2;SFRP4;NIBAN2;SKIL;SORL1;ZEB1;TGFB1;TGFB1I1;THBS1;TNFAIP6;UBE2D3;FBXL1…	3.8256	2.63e-19
GOBP_NADH_DEHYDROGENASE_COMPLEX_ASSEMBLY	NDUFA11;NDUFAF8;NDUFS7;MT-ND1;MT-ND2;MT-ND4;MT-ND5;MT-ND6;NDUFA1;NDUFA2;NDUFA3;NDUFA5;NDUFA8;NDUFAB1;NDUFB1;NDUFB2;NDUFB3;NDUFB4;NDUFB5;NDUFB6;NDUFB7;NDUFB8;NDUFB9;NDUFC1;NDUFC2;NDUFS5;NDUFA13;NDUFB11;NDUFA12;DMAC1	13.5682	2.74e-19
GOBP_AXON_DEVELOPMENT	CDH2;CDH11;TUBB3;SEMA6B;SEMA3C;C12orf57;EMB;CRABP2;CSF1R;CTNNA1;ARX;DLX5;DPYSL2;EDN1;EDNRA;EFNA1;EPHA2;CTTN;C9orf72;EPHB6;ALCAM;PALLD;FLNA;COBL;FN1;FOLR1;MACF1;PLXNB2;GFRA3;GOLGA4;ANK3;GRN;HSP90AA1;HSP90AB1;APLP2;APOD;IFRD1;APOE;ITGB1;JUN;KIF5B;LAMA5;LAMC2;STMN1;MAP1B;MBP;MMP2;NFIB;NR4A2;PLP1;PLXNB1;PLXNB3;ENAH;MAP2K1;MAP2K2;RELN;SEMA3G;RTN4;PTCH1;PTN;SHTN1;PTPRF;PTPRS;RAC1;RAC2;BCL2;ACTB;RPL24;S…	3.19384	4.07e-19
GOBP_GLAND_MORPHOGENESIS	CEBPB;SEMA3C;KDM5B;PHB2;CRIP1;CSF1R;EPHA2;ELF3;ESR1;FGF7;SULF1;ID4;IGFBP5;AR;AREG;LAMA5;MDK;MMP2;MSN;MSX2;NFIB;NFKB1;PGR;WNT4;PTCH1;PTN;NTN4;BCL2;SFRP1;SNAI2;SOX9;TBX3;TGFB1;TGM2;TNF;TNFAIP3;EZR;XBP1;DDR1;CAV1;NRP1;CFLAR;SLC9A3R1	6.9838	5.28e-19
GOBP_REGULATION_OF_WNT_SIGNALING_PATHWAY	CDH2;RACK1;RUVBL2;CTHRC1;COL1A1;APCDD1;CTNNB1;CTNND1;DAB2;DDX3X;TLE5;DLX5;EGR1;DKK1;FOXO1;FOXO3;SULF1;FOLR1;MACF1;ATP6V1C2;CBY1;SPEF1;GPC3;RBMS3;TAX1BP3;HIC1;APOE;IGFBP1;IGFBP2;IGFBP4;IGFBP6;RBPJ;ILK;ITGA3;JUP;LRP1;MDK;CCDC88C;NFKB1;DCDC2;PFDN5;ATP6V0C;PPP1CA;USP47;LGR4;VPS35;IFT80;RPS12;SFRP1;SFRP2;SFRP4;SOX17;SNAI2;SOX4;SOX9;SOX10;STK4;HNF1B;TGFB1;TLR2;TNFAIP3;UBE2B;TTC21B;WLS;BICC1;FUZ;LGR5;CA…	3.78857	7.06e-19
GOBP_REGULATION_OF_RESPONSE_TO_WOUNDING	FERMT2;CLDN4;CLDN3;ADRA2A;EDN1;F3;ENPP4;FLNA;ALOX12;GRN;ANXA1;ANXA2;APOE;IL10;ITGB1;MDK;NFE2L2;DDR2;SERPINE1;SERPINB2;TNFRSF12A;PDGFRA;PLAT;PLAUR;WNT4;MAP2K1;MAP2K2;PTN;PTPRF;PTPRS;ACTA2;CLEC7A;SPP1;PRDX2;TFPI;THBD;THBS1;ACTG1;SERPING1;TSPAN8;TNF;TNFAIP3;XBP1;CXCR4;VKORC1;EMILIN2;CAV1;CLDN1;CD9;KLF4;CD36	5.55391	7.19e-19
GOBP_RESPONSE_TO_MECHANICAL_STIMULUS	CDH2;CITED2;TXNIP;MAP3K2;CHI3L1;COL1A1;COL11A1;MTPN;CTNNB1;CYBA;GADD45A;EDN1;ENDOG;ENG;PTK2B;FOS;FOSB;GATA4;GCLC;GSN;IGFBP2;IHH;IL1B;IRF1;JUN;JUND;JUP;RHOA;MAP1B;MDK;MEIS2;MMP2;MMP14;NFKB1;NFKBIA;DDR2;F11R;SLC38A2;USP53;STRBP;PTCH1;PTGS2;PTN;CXCL12;PIEZO2;SLC2A1;SOX9;THBS1;ACTG1;TNF;TNFRSF1A;BTG2;CXCR4;CAPN2;LRP11;TNFRSF10B;BAG3	4.88294	8.55e-19
GOBP_CELL_MATRIX_ADHESION	MSLN;FBLN5;CIB1;SORBS1;FERMT2;COL3A1;COL16A1;CCN2;CTNNB1;JAG1;CTTN;PTK2B;FN1;MACF1;EFEMP2;APOD;ILK;ITGA6;ITGA3;ITGA5;ITGAM;ITGAX;ITGB1;ITGB2;ITGB4;ITGB8;JUP;RHOA;LIMS1;BCAM;MMP14;NID1;SERPINE1;PIK3R1;WNT4;ADAMTS9;RAC1;BCL2;ROCK1;RRAS;S100A10;CCL21;SDC4;SFRP1;THBS1;THY1;TLN1;ACTG1;TNXB;UTRN;VCAM1;VCL;VEGFA;ZYX;DDR1;ACTN1;NRP1;SGCE;CD36;CD44;CD63	4.55001	8.95e-19
GOBP_MITOTIC_CELL_CYCLE_PROCESS	PDCD6IP;SPRY1;CDKN1A;CDK2AP2;CCNO;GPNMB;TACC2;SMC2;CFL1;NUDC;CCNI;PHB2;EFHC1;CKS2;PLK3;TOGARAM2;DDX3X;DUSP1;EDN1;EIF4E;AIF1;EPS8;EREG;STOX1;PDS5B;FLNA;PLCB1;CDC26;SYF2;KANK2;GJA1;CHMP2A;UBE2S;ANK3;RGCC;CHMP4A;GPR132;ANAPC4;NOP53;ANXA1;HNRNPU;APEX1;HSPA1A;HSPA1B;ID2;ID4;DCDC1;IGF1;IK;IL1A;IL1B;INSR;ITGB1;ARF1;KIF2A;KIF22;RHOA;RHOB;RHOC;STMN1;ARL3;MAP4;MDM2;MUC1;MYC;MYH10;NASP;DDR2;RRM2B;PBX1;RPS27…	2.60388	9.39e-19
GOBP_CELLULAR_RESPONSE_TO_EXTRACELLULAR_STIMULUS	CDKN1A;POSTN;GABARAP;GABARAPL2;PLIN2;COL1A1;COMT;CTSK;TLE5;AIF1;FOXO1;FOXO3;FOLR1;FOS;GABARAPL1;KANK2;GAS6;GLUL;DCPS;DNAJC15;HNRNPA1;HSPA5;HSPA8;IFI16;AQP3;LEP;LPL;MAP3K5;MN1;MAP1LC3C;ATF3;NFE2L2;ATP2B1;NR4A2;SH3GLB1;PDK4;PIM1;PMAIP1;WNT4;SLC38A2;AXL;WDR45B;PTPRC;BCL2;SFRP1;SFRP2;SLC2A1;SNAI2;KLF10;UCP2;UPP1;VCAM1;XBP1;DCTPP1;CPEB4;SLC7A5;MAP1LC3B;MAP1LC3A;MFSD2A;AKR1C3;XPR1;DAPL1;EIF2AK3;CD68	4.33557	9.55e-19
GOBP_REGULATION_OF_REACTIVE_OXYGEN_SPECIES_METABOLIC_PROCESS	CDKN1A;FBLN5;PARK7;ROMO1;CRYAB;CYBA;CYP1B1;GADD45A;PTK2B;FOXO1;FOXO3;GCH1;GNAI2;H19;GRB2;GSTP1;HIF1A;HP;ITGAM;ITGB2;ARF4;ARG2;RHOA;LEP;MT-CO2;NDUFC2;NFE2L2;RAC1;RAC2;BCL2;CLEC7A;SLC5A3;SLC18A2;SOD1;SOD2;PRDX2;TGFB1;THBS1;TSPO;TNF;TYROBP;VDAC1;BCO2;AKR1C3;CFLAR;CD36;PAGE4	6.06742	1.03e-18
GOBP_T_CELL_PROLIFERATION	CD24;LILRB2;GPNMB;CEBPB;CORO1A;CTNNB1;CD55;AIF1;FOXJ1;CADM1;PYCARD;ANXA1;HLA-A;HLA-DMB;HLA-DPA1;HLA-DPB1;HLA-DRB1;HLA-E;HMGB1;HES1;IGF1;IGFBP2;IHH;IL1A;IL1B;IL6ST;IL10;IL18;IDO1;IRF1;ARG2;LEP;LGALS3;CD46;MSN;PNP;PAWR;WNT4;PRKAR1A;PELI1;PTPRC;SELENOK;RAC2;RPS3;RPS6;CCL5;BID;SDC4;VSIR;SLC11A1;PRDX2;TFRC;TNFRSF1B;VCAM1;DLG5;CD81;CD151	4.85132	1.09e-18
GOBP_OSTEOBLAST_DIFFERENTIATION	TOB1;CEBPB;CEBPD;FERMT2;CTHRC1;TWIST2;CLIC1;COL1A1;COL6A1;VCAN;CTNNB1;DDX5;DLX5;JAG1;EPHA2;RBMX;HNRNPC;HNRNPU;HSPE1;ID3;ID4;IGF1;IGFBP3;IGFBP5;CCN1;IHH;IL6ST;ILK;JUNB;JUND;AREG;LTF;SMAD5;MSX2;DDR2;ATP5F1B;CRIM1;WNT4;LGR4;TENT5A;MAP2K6;PTCH1;IFT80;RORB;RPS15;RRBP1;CCL3;SFRP1;SFRP2;BMPR1B;SNAI2;SOX9;SPP1;TNF;TNFAIP6;TPM4;TWIST1;CAT;IFITM1;DDX21;HAND2;MRC2	4.44939	1.15e-18
GOBP_MRNA_METABOLIC_PROCESS	HIPK3;TOB1;MBNL2;SRRM1;SAP18;DDX17;IGF2BP2;CELF2;AHCYL1;PAPOLA;HNRNPA0;CIRBP;CLNS1A;DDX5;EREG;ERN1;HNRNPA3;ZBTB1;TNRC6B;TUT4;SF3B1;SRRM2;CARHSP1;EDC4;LSM5;FUS;LSM4;SYF2;SERBP1;PABPC1;LSM1;LSM3;RBMX;DCPS;TRA2A;ANXA2;HNRNPA1;HNRNPA2B1;HNRNPAB;HNRNPC;HNRNPF;HNRNPH1;HNRNPH3;HNRNPK;HNRNPU;APEX1;HSPA1A;HSPA1B;HSPA8;IK;EIF3E;LGALS3;MBNL1;NCL;SNU13;NPM1;YBX1;MYEF2;PCBP2;SF3B6;LSM7;LUC7L3;PNN;POLR2G;POLR2…	2.65368	1.16e-18
GOBP_REGULATION_OF_INTRACELLULAR_TRANSPORT	MRLN;CIB1;EHD1;PKIG;PARK7;SLC51B;PLK3;CRYAB;DAB2;MAPK15;FLNA;WWC1;SVIP;GAS1;GAS6;SFN;ANK3;ANXA2;HCLS1;HSP90AA1;HSP90AB1;IFI27;APOD;IL1B;INSIG1;ITGAM;ITGB2;JUP;KCNE1;LCP1;LEP;LMAN1;MAP1B;MSN;OAZ1;FIS1;PCM1;SH3GLB1;ERGIC3;PIK3R1;STX18;TOMM7;LEPROT;VPS35;MAP2K1;MAP2K2;PTGS2;PTPN1;RHOU;RAC2;RAN;UBL5;RBM4;SCP2;SLC1A1;BNIP3L;SORL1;TGFB1;TXN;UBE2D3;SUMO1;EZR;YWHAE;TTC21B;CEP290;SNX3;DERL3;PDCD5;ATP5IF1;…	3.7513	1.88e-18
GOBP_REGULATION_OF_IMMUNE_EFFECTOR_PROCESS	SPON2;FGL2;IRAK3;PHB2;NLRP3;SLC15A4;CD55;AHR;A2M;FCN1;FGR;ZBTB1;FOXJ1;CADM1;GATA2;GRN;PYCARD;ANXA1;CFH;HLA-A;HLA-B;HLA-DMB;HLA-DRA;HLA-DRB1;HLA-E;HMGB1;HSPD1;ICAM1;IL1B;IL1R1;IL7R;IL10;IL18;ITGAM;ITGB2;JUNB;LEP;LGALS3;ARRB2;CD46;DNAJB9;MIF;CFP;SERPINB9;PLA2G5;AXL;B2M;PTPRC;NECTIN2;RAC2;RPS19;NFKBIZ;CLEC7A;SPI1;STXBP2;BST2;TMBIM6;TFRC;TGFB1;SERPING1;TNF;TNFRSF1B;C3;C4BPA;TWIST1;TYROBP;WAS;XBP1;LAP…	3.52017	1.96e-18
GOBP_SMALL_MOLECULE_BIOSYNTHETIC_PROCESS	AASS;AKR1A1;FAM3C;PTGES3;PARK7;MGLL;ADCYAP1R1;ADM;CRABP2;DAB2;SPTSSA;EDN1;EGR1;ALDH1A1;FABP5;PTK2B;ALDH1A3;FDFT1;FDPS;FDXR;SEPHS2;FOXO1;ALOX12;ALOX5AP;SERINC5;PHGDH;GCH1;GLS;GLUL;GPD1;PGP;GPX4;PYCARD;GSTP1;PYCR2;ANXA1;HMGCR;HMGCS1;APOC1;APOE;APRT;IL1B;IMPA2;IDO1;INSIG1;LEP;LEPR;LPL;MDH2;MGST2;MGST3;ASAH1;MIF;ASL;MTHFD2L;MST1;ATF3;NDUFAB1;NFKB1;NNMT;PNP;NT5E;PCBD1;COQ4;PDK4;ADA2;PGK1;PLA2G5;PLEK;P…	2.92292	2.06e-18
GOBP_CELLULAR_RESPONSE_TO_STEROID_HORMONE_STIMULUS	DDX17;PTGES3;PARK7;PHB2;FBXO32;SRARP;CYP1B1;DAB2;DNAAF4;DAXX;DDX5;EDN1;EIF4E;ESR1;FOXO3;KANK2;GJB2;ANXA1;HNRNPU;DNAJA1;HSPA1A;HSPA1B;HSPA8;AR;RHOA;SCGB2A1;MT-ND3;ATP1A1;ATP2B1;ATP5F1A;SERPINF1;PER1;PGR;PLAT;ERRFI1;DDIT4;PMEPA1;SCNN1A;SFRP1;SGK1;SOX10;ZFP36L1;ZFP36L2;STC1;KLF9;TFPI;TMF1;YWHAH;ZFP36;NR4A3;NCOA4;CALR;LBH;PLPP1;AKR1C3;CFLAR	4.82716	2.59e-18
GOBP_GRANULOCYTE_CHEMOTAXIS	CXCL13;JAML;CSF1R;CSF3R;CXADR;DPP4;EDN1;FCER1G;CXCL1;CXCL2;CXCL3;ANXA1;IL1B;CXCL8;ITGB2;LGALS3;MDK;CKLF;PDE4B;TREM1;PPIA;PPIB;S100A14;RAC1;RAC2;RARRES2;S100A8;S100A9;S100A12;SAA1;CCL2;CCL3;CCL3L1;CCL4;CCL5;CCL20;CCL21;BSG;THBS1;TNFAIP6;C3AR1;C5AR1;CD74	6.57697	2.92e-18
GOBP_NEGATIVE_REGULATION_OF_CELL_ADHESION	LILRB2;GPNMB;CEBPB;SPINT2;FGL2;COL1A1;CLDN7;CYP1B1;JAG1;DUSP1;ERBB3;FBLN1;FOXJ1;PLXNB2;ALOX12;GBP1;RGCC;ANXA1;HLA-DRB1;HMGB1;APOD;IHH;IL1RN;IL10;IDO1;IRF1;ARG2;RHOA;LGALS3;TACSTD2;EPCAM;MBP;MDK;MMP2;MMP14;MUC1;SERPINE1;ATP5F1B;PAWR;PIK3R1;PLXNB1;PLXNB3;FXYD5;PODXL;PRKAR1A;PELI1;PTPRC;CCL21;SDC4;CXCL12;VSIR;SNAI2;SPI1;PRDX2;TGFB1;TGFBI;THBS1;VEGFA;LAPTM5;AKNA;ACTN4;CD164;SEMA5A;MYADM;DLG5;CD9;KLF4…	3.8883	3.1e-18
GOBP_CELLULAR_RESPONSE_TO_PEPTIDE_HORMONE_STIMULUS	NAMPT;SORBS1;AHCYL1;RAB31;CYBA;CYP1B1;AGTR2;EDN1;EDNRA;FBN1;FOXO1;PLCB1;FOS;DNAI1;GJB2;GCLC;GNAI2;TRARG1;GRB2;SLC2A8;NR4A1;APEX1;IGFBP1;APRT;IL1B;INSIG1;INSR;LEP;LPL;MAP1B;NCL;NFE2L2;NFKB1;ATP2B1;DDR2;NR4A2;PDK4;PIK3R1;PKM;PLAT;ERRFI1;POR;LEPROT;SELENOS;AGTRAP;PTPN1;PTPRE;RAB13;RARRES2;RBM4;ROCK1;SCNN1A;SRSF5;ZNF106;NUCKS1;SORL1;ZFP36L1;STAT3;UCP2;XBP1;NR4A3;CAV1;IRS2;SOCS2;CFLAR;SOCS3;GLP2R;SYAP…	3.8883	3.1e-18
GOBP_POSITIVE_REGULATION_OF_APOPTOTIC_SIGNALING_PATHWAY	RACK1;CTSC;PARK7;CTNNA1;CTSH;AGTR2;EIF5A;NUPR1;PYCARD;PDIA3;MCL1;MSX1;MYC;ATF3;G0S2;FIS1;TNFRSF12A;PMAIP1;IL20RA;PPP1CA;PTPRC;RPL11;RPL26;RPS3;RPS7;S100A8;S100A9;BID;SFPQ;SFRP1;SKIL;BMPR1B;SOD1;STK4;THBS1;TIMP3;TNF;TPD52L1;UBB;SRPX;CAV1;TNFSF10;SLC9A3R1;EEF1E1	6.36145	3.17e-18
GOBP_PROTEIN_MATURATION	STUB1;SPON1;PRDX4;CARD16;OMA1;COMP;CPE;CPM;CTSH;CTSL;CTSS;CTSZ;AEBP1;DPP4;ENO1;F3;FBLN1;FKBP1A;FLNA;FN1;SEC11A;TSPAN15;BACE2;TMEM98;IFT172;GAS1;GCSH;SPCS1;TMEM208;PYCARD;GSN;ANXA2;HP;HSPD1;IFI16;IHH;MME;MMP14;NDUFAB1;SERPINE1;NAA20;CIAO2B;PGK1;PLAT;PLAUR;CYCS;SRGN;PSENEN;CPXM1;LGMN;TMPRSS4;PTCH1;BCHE;S100A10;PERP;VSIR;SCG5;SORL1;SOX4;THBD;THBS1;C1R;IL1R2;DYNC2H1;NAA50;CALR;HM13;CAPN2;CAST;NAA38;S…	3.70847	3.19e-18
GOBP_SKIN_DEVELOPMENT	TXNIP;PTGES3;COL1A1;COL1A2;COL3A1;COL5A1;COL5A2;COMP;CLDN4;APCDD1;CSTA;CTNNB1;JAG1;DSP;EPHA2;EREG;FGF7;DKK1;PALLD;FLG;FLNB;KAZN;FOSL2;ALOX12;CLIC4;GATA6;INTU;SFN;ANXA1;IGFBP5;RBPJ;IL1A;AQP3;IL18;ITGA6;IRF6;ITGA3;ITGB4;JUP;KRT7;KRT8;KRT10;KRT17;LAMA5;STMN1;MET;ASAH1;MSX2;NME2;ERRFI1;LGR4;MAP2K1;PLAAT4;BCL2;ROCK1;SOX9;SPRR2F;ZFP36L1;STK4;TGM1;TNF;UGCG;ZFP36;IFT74;FUZ;LGR5;AKR1C3;CLDN1;KLF4	3.93204	3.3e-18
GOBP_RESPONSE_TO_KETONE	KLF2;TXNIP;POSTN;PARK7;FBXO32;CLDN4;CYBA;CYBB;CYP1B1;NQO1;EDN1;AHR;EIF4E;A2M;FOXO3;FOS;FOSB;GAS6;GJB2;DCPS;HOXA10;IGFBP7;AR;MBP;MSN;NASP;ATP2B1;ATP5F1A;SERPINF1;PLAT;ERRFI1;POR;DDIT4;PTGER2;CCND1;RPL27;RPLP0;SCNN1A;CCL21;SFRP1;SGK1;SLIT3;SOX10;SPP1;KLF9;TGFB1;THBS1;TSPO;TLR2;NCOA4;CALR;CAV1;AKR1C3;CFLAR;CLDN1	4.86712	3.82e-18
GOBP_CELL_SURFACE_RECEPTOR_SIGNALING_PATHWAY_INVOLVED_IN_CELL_CELL_SIGNALING	CDH2;CD24;RACK1;RUVBL2;FERMT2;CTHRC1;COL1A1;CPE;CSNK2B;APCDD1;CTNNB1;CTNND1;IGSF11;DAB2;DDX3X;TLE5;DLX5;EDN1;EDNRA;EDNRB;EGR1;PTK2B;DKK1;FOXO1;FOXO3;SULF1;FOLR1;MACF1;ATP6V1C2;GABRP;CBY1;SPEF1;GPC3;RBMS3;TAX1BP3;HIC1;APOE;IGFBP1;IGFBP2;IGFBP4;IGFBP6;RBPJ;ILK;ITGA3;ITGAM;JUP;RHOA;LRP1;ARRB2;MDK;MITF;CCDC88C;NFKB1;NR4A2;SHANK1;DCDC2;PFDN5;ATP6V0C;WNT4;PPP1CA;USP47;LGR4;VPS35;RELN;NDRG2;IFT80;RAC1;C…	2.89201	3.87e-18
GOBP_EPIDERMIS_DEVELOPMENT	TXNIP;TRIOBP;CRABP2;CST6;APCDD1;CSTA;CCN2;CTNNB1;JAG1;DSP;EPHA2;EMP1;EREG;FABP5;FGF7;DKK1;PALLD;FLG;FLNB;KAZN;FOSL2;MAFF;CLIC4;IFT172;GATA6;INTU;SFN;ANXA1;HLA-DRB1;HES1;IGFBP5;RBPJ;IL1A;AQP3;INSR;IRF6;KRT7;KRT8;KRT10;KRT17;LAMA5;LAMB3;LAMC2;ASAH1;MSX2;MYO6;NME2;ATP2A2;YBX1;ERRFI1;LGR4;MAP2K1;PTCH1;PLAAT4;BCL2;ROCK1;SFRP4;BNC1;SOD1;SOX9;SPINT1;SPRR2F;ZFP36L1;STK4;TGM1;TNF;UGCG;WAS;ZFP36;SVEP1;IFT7…	3.57625	3.89e-18
GOBP_RESPIRATORY_SYSTEM_DEVELOPMENT	SPRY1;KLF2;BASP1;AGR2;PDPN;PTGES3;CHI3L1;DNAAF1;COL3A1;CCN2;CTNNB1;CTSH;CTSZ;DLX5;EIF4E;ALDH1A3;FGF7;FOXJ1;RPGRIP1L;SPDEF;GATA6;GPC3;HES1;CCDC39;IGFBP5;RBPJ;ITGA3;LAMA5;LIF;LIPA;MME;MMP14;NFIB;PDGFRA;HSPB11;PGR;ERRFI1;HYDIN;PPP1CA;CCDC40;MAP2K1;MAP2K2;HEG1;SOX9;TNF;TP73;VEGFA;WNT2;YWHAZ;SPEF2;CRISPLD2;ALDH1A2;PKDCC;DLG5;SLC23A1;CDC42	4.76465	4.17e-18
GOBP_POSITIVE_REGULATION_OF_LEUKOCYTE_MIGRATION	CXCL13;CORO1A;CSF1R;EDN1;AIF1;PTK2B;GAS6;ABL2;PYCARD;HMGB1;ICAM1;IL1A;IL1R1;CXCL8;RHOA;LGALS3;MDK;CD99;MMP14;NEDD9;SERPINE1;PIK3R1;LGMN;S100A14;PTN;SELENOK;RAC1;RAC2;RARRES2;CCL3;CCL4;CCL5;CCL20;CCL21;CXCL12;GPSM3;SPI1;THBS1;THY1;TNF;C3AR1;C5AR1;VEGFA;CALR;CD47;CD74	5.93475	4.62e-18
GOBP_POSITIVE_REGULATION_OF_B_CELL_ACTIVATION	CDKN1A;IGHV1-69D;GPR183;IGHV6-1;IGHV5-51;IGHV4-61;IGHV4-59;IGHV4-39;IGHV4-34;IGHV4-4;IGHV3-74;IGHV3-53;IGHV3-49;IGHV3-48;IGHV3-33;IGHV3-30;IGHV3-23;IGHV3-21;IGHV3-20;IGHV3-15;IGHV3-13;IGHV3-11;IGHV3-7;IGHV2-5;IGHV1-18;IGHV1-3;IGHA1;IGHA2;IGHG1;IGHG2;IGHG4;IGHM;IGKC;IL10;MIF;MMP14;PRLR;PELI1;PTPRC;BCL2;TFRC;TGFB1;XBP1;IRS2;CD74;CD81	5.93475	4.62e-18
GOBP_REGENERATION	CDKN1A;CPQ;CEBPB;ADM;MTPN;CTNNA1;FLNA;FOLR1;GAS6;GATA4;GRN;ANXA1;ANXA3;APOD;IFRD1;IGF1;IGFBP1;IHH;IL10;JUN;LCP1;MAP1B;MDK;MMP2;NINJ1;NNMT;OMG;PRRX1;AXL;MAP2K1;MAP2K2;PTCH1;PTN;PTPRF;PTPRS;CCND1;BCL2;CXCL12;SRSF5;SPP1;KLF5;TSPO;THY1;TNF;UCP2;NR4A3;SLC7A5;CFLAR;CLDN1;CD9;KLF4;NREP;CD81	5.02598	4.98e-18
GOBP_PRODUCTION_OF_MOLECULAR_MEDIATOR_OF_IMMUNE_RESPONSE	SPON2;IRAK3;PHB2;NLRP3;SLC15A4;CD55;GAPT;SAMHD1;IGKV1-5;IGLV7-46;IGLV6-57;IGLV5-52;IGLV3-25;IGLV3-21;IGLV3-19;IGLV3-1;IGLV2-23;IGLV2-14;IGLV2-11;IGLV2-8;IGLV1-51;IGLV1-47;IGLV1-44;IGLV1-40;IGKV4-1;IGKV3-20;IGKV3-15;IGKV1-17;IGKV1-16;IGKV1-9;IGKV1-6;PYCARD;HLA-A;HLA-DMA;HLA-DMB;HLA-DPA1;HLA-DPB1;HLA-DQA1;HLA-DQA2;HLA-DQB1;HLA-DRA;HLA-DRB1;HLA-DRB5;HLA-E;HSPD1;IL1B;IL1R1;IL10;IL18;DNAJB9;MIF;TREM1;…	3.69947	5.94e-18
GOBP_REGULATION_OF_ION_TRANSPORT	MRLN;COX17;PPIF;AKAP9;LILRB2;CEBPB;ARL6IP5;AHCYL1;CORO1A;PARK7;PHB2;ADCYAP1R1;CLIC1;CLIC2;SLC43A2;OSR1;TMEM37;CTNNB1;ADRA2A;EFHB;ADRA2C;CTSS;CYBA;CYBB;CNKSR3;DAPK1;EDN1;EDNRA;GRAMD2A;PTK2B;LRRC55;FKBP1A;FLNA;ARL6IP1;ARC;CLIC4;NIPSNAP2;GEM;GNAI2;GNB2;ANK3;RANGRF;HES1;IL1A;IL1B;ITGB1;KCNE1;KIF5B;RHOA;LEP;LGALS3;C4orf3;ARRB2;MIF;NDUFA4;ATP1A1;ATP1B1;ATP1B3;FXYD2;ATP2B1;SHANK1;PDE4B;SARAF;PER1;PKP2;F…	2.64139	7.34e-18
GOBP_NEURON_DEATH	RACK1;GPNMB;CEBPB;ARL6IP5;CHGA;CORO1A;PARK7;CLU;NCOA7;CTNNB1;CTSZ;DAXX;NQO1;AGTR2;EGR1;ENDOG;ERBB3;PTK2B;DKK1;FOXO3;TRIM2;FOS;GAPDH;FAM162A;NUPR1;GCLC;GCLM;GRN;CHMP4A;HDGF;HIF1A;HSPA5;HSP90AB1;APOE;IL6ST;IL10;ITGAM;ITGB2;JUN;RHOA;ARRB2;MCL1;MDK;MAP3K5;DDR2;NR4A2;SERPINF1;RETREG1;DDIT4;OXR1;PPT1;VPS35;AXL;LGMN;CCND1;BCL2;ROCK1;CCL2;CCL3;CCL5;BID;SET;SLC1A1;SOD1;SOD2;SORL1;TMBIM6;TNF;TNFRSF1B;TYROB…	3.5264	7.56e-18
GOBP_PROTEIN_STABILIZATION	TSPAN1;IFI30;PFDN6;PTGES3;RUVBL2;PARK7;PHB2;CLU;PIH1D2;CRYAB;CTNND1;EFNA1;FLNA;GAPDH;GRN;NOP53;HSPA1A;HSPA1B;HSP90AA1;HSP90AB1;HSPD1;IGF1;MSX1;ATP1B1;ATP1B3;NPM1;PFDN5;PFN1;PFN2;PIM1;PIK3R1;TRIM44;PPIB;IFT46;RTN4;RPL5;RPL11;RPS7;SOX17;SOX4;SPAG1;STK4;TCP1;CCT3;TYROBP;UBE2B;SUMO1;CALR;CAMLG;UXT;RUVBL1;PLPP3;CCNH;CCT6A;RPL23;BAG3	4.67384	8.41e-18
GOBP_ESTABLISHMENT_OF_PROTEIN_LOCALIZATION_TO_ORGANELLE	TOMM6;CDKN1A;TXNIP;MTX2;RUVBL2;SEC61B;PKIG;PHB2;CLU;ROMO1;LRWD1;FLNA;TRAM1;SEC61G;SAMM50;TIMM13;TIMM8B;SPCS1;CHMP4A;RANGRF;DNAJC15;SEC61A1;HCLS1;DNAJA1;HSPA5;HSPA8;HSP90AA1;HSP90AB1;HSPD1;APOD;IL10RA;JUP;LEP;LMAN1;LMNA;TOMM5;M6PR;NFKBIA;FIS1;NDUFA13;SH3GLB1;PIK3R1;TOMM7;LEPROT;NUP62CL;VPS13C;PPP1R10;PTGS2;RHOU;RAC2;RAN;RANBP2;UBL5;BID;BNIP3L;SORL1;SRP9;SRP14;SSR3;STAT3;STK4;TCP1;TGFB1;TSPO;SEC62;…	3.21253	8.46e-18
GOBP_NON_MEMBRANE_BOUNDED_ORGANELLE_ASSEMBLY	PDCD6IP;MYL9;CDS1;CETN2;TUBGCP2;AKAP13;CIRBP;CCDC78;CSRP1;CSRP2;TOGARAM2;DDX3X;EDN1;CENPX;TUBB;C9orf72;PPP1R35;MAPK15;MAPRE3;FLNA;FLNC;PRRC2C;LSM4;CCDC69;CHMP2A;LSM3;CHMP4A;GSN;NOP53;HCK;HNRNPU;HSPA1A;HSPA1B;ITGB1;KIF2A;RHOA;KRT19;RPSA;LCP1;SMIM22;MSN;MYH11;NPM1;RPS27L;MRPS2;SBDS;NGRN;CHMP5;PDGFRA;MRPL20;PRKAR1A;CHMP1B;RPL5;RPL6;RPL10;RPL11;RPL23A;RPL24;RPL38;RPLP0;RPS3;RPS5;RPS14;RPS15;RPS19;RPS…	3.35235	8.61e-18
GOBP_POSITIVE_REGULATION_OF_DEFENSE_RESPONSE	TNIP1;CEBPB;HEXIM1;CTSC;PARK7;NLRP3;SLC15A4;C2CD4A;CYBA;DDT;EREG;FCN1;CADM1;ALOX5AP;XRCC6;NUPR1;PDCD4;NEAT1;GRN;PYCARD;HCK;HLA-E;HMGB1;HMGB2;HSP90AA1;IFI16;IL1B;IL6ST;IL18;IDO1;C2CD4B;LDLR;LGALS1;LGALS2;LPL;MDK;MGST2;MNDA;NFKBIA;NINJ1;OSM;SERPINE1;PLA2G2A;PLA2G5;PLSCR1;PTGER3;PTGS2;NECTIN2;RPS19;S100A8;S100A9;S100A12;CCL3;CCL5;GPSM3;SFPQ;NFKBIZ;CLEC7A;SPI1;TLR2;TNF;TNFRSF1A;C3;TYROBP;EMILIN2;VAMP…	3.83158	1.01e-17
GOBP_NEUTROPHIL_CHEMOTAXIS	CXCL13;JAML;CSF3R;CXADR;DPP4;EDN1;FCER1G;CXCL1;CXCL2;CXCL3;IL1B;CXCL8;ITGB2;LGALS3;MDK;CKLF;PDE4B;TREM1;PPIA;PPIB;RAC1;RAC2;S100A8;S100A9;S100A12;SAA1;CCL2;CCL3;CCL3L1;CCL4;CCL5;CCL20;CCL21;BSG;TNFAIP6;C3AR1;C5AR1;CD74	7.45173	1.09e-17
GOBP_POSITIVE_REGULATION_OF_SUPRAMOLECULAR_FIBER_ORGANIZATION	ARPC2;AKAP9;WASF2;CDC42EP3;FERMT2;DSTN;SYNPO;CLU;CCN2;EDN1;CTTN;PTK2B;GRB2;RGCC;PYCARD;GSN;EFEMP2;HCK;HSPA1A;HSPA1B;ID1;APOE;RHOA;RHOC;ARL2;MAP1B;MET;PFN1;PFN2;PLEK;WNT4;CCDC88A;BRK1;SLAIN2;RAC1;RPS3;S100A10;CCL21;SDC4;SFRP1;TNXB;TPM1;VASP;WAS;NRP1;SEMA5A;MYLK3;CD47;PDE4DIP;CDC42	5.22659	1.16e-17
GOBP_RNA_SPLICING_VIA_TRANSESTERIFICATION_REACTIONS	MBNL2;SRRM1;SAP18;DDX17;CELF2;CIRBP;CLNS1A;DDX5;HNRNPA3;SF3B1;SRRM2;LSM5;LSM4;SYF2;PABPC1;LSM1;LSM3;RBMX;DCPS;TRA2A;HNRNPA1;HNRNPA2B1;HNRNPC;HNRNPF;HNRNPH1;HNRNPH3;HNRNPK;HNRNPU;HSPA8;IK;MBNL1;NCL;SNU13;NPM1;SF3B6;LSM7;LUC7L3;PNN;RBM38;RBM25;UBL5;RBM3;RBM4;SFPQ;SRSF2;SRSF3;SRSF5;SRSF7;TRA2B;SNRPB;SNRPB2;SNRPC;SNRPD1;SNRPD2;SNRPE;SNRPF;SNRPG;SNRPN;SON;WDR77;DDX39B;FXR1;SF3B5;ZCRB1;SRSF9;BUD31;QKI;…	3.67598	1.31e-17
GOBP_ION_HOMEOSTASIS	SLC34A2;CYB561D2;CORO1A;CKB;CLIC2;ADM;CP;CYB561;CYBA;EDN1;EDNRA;EDNRB;ALAS2;PTK2B;FKBP1A;FLNA;PRND;FTH1;FTL;CLIC4;GLS;GNAI2;ANK3;GRN;SLC40A1;HIF1A;APOE;IL1A;ARF1;LCN2;LTF;RNASEK;MT1E;MT1F;MT1G;MT1H;MT1M;MT1X;MT2A;MYC;ATOX1;ATP1A1;ATP1B1;ATP1B3;ATP2A2;ATP2B1;NT5E;ATP5F1B;FIS1;SLC25A37;ATP6V1D;PDK4;ATP6V1A;ATP6V1B2;ATP6V0C;ATP6V0B;PPT1;TMEM165;B2M;S100A14;PTPRC;SELENOK;BCL2;S100A8;S100A9;SCN7A;SCNN…	2.76668	1.36e-17
GOBP_GRANULOCYTE_MIGRATION	CXCL13;JAML;CSF1R;CSF3R;CXADR;DPP4;EDN1;FCER1G;CXCL1;CXCL2;CXCL3;ANXA1;IL1A;IL1B;IL1R1;CXCL8;ITGB2;LGALS3;MDK;CD99;CKLF;PDE4B;TREM1;PPIA;PPIB;S100A14;SELENOK;RAC1;RAC2;RARRES2;S100A8;S100A9;S100A12;SAA1;CCL2;CCL3;CCL3L1;CCL4;CCL5;CCL20;CCL21;BSG;THBS1;TNFAIP6;C3AR1;C5AR1;CD74	5.57346	1.44e-17
GOBP_MONONUCLEAR_CELL_MIGRATION	CXCL13;CORO1A;JAML;CSF1R;DUSP1;GPR183;ECM1;AIF1;EPS8;PTK2B;PLCB1;GAS6;ABL2;PYCARD;ANXA1;HMGB1;ICAM1;APOD;RHOA;LGALS3;MDK;CD99;MSN;NBL1;NEDD9;SERPINE1;F11R;CKLF;LGMN;S100A14;SELENOK;RARRES2;RPS19;S100A12;SAA1;CCL2;CCL3;CCL3L1;CCL4;CCL5;CCL20;CCL21;CXCL12;MYO1G;SPI1;THBS1;TNF;C3AR1;C5AR1;CXCR4;CALR;CH25H;CD47;CDC42	4.7451	1.86e-17
GOBP_CELL_CELL_JUNCTION_ASSEMBLY	CDH2;PDCD6IP;CDH11;CLDN4;CLDN3;CLDN7;FRMPD2;CTNNA1;CTNNB1;CTNND1;EPHA2;HIPK1;CDHR3;EPB41L3;CLDN15;GJA1;GJA5;GJB2;IL1B;JUP;RHOA;RHOC;ARL2;AFDN;NPHP1;F11R;PKP2;HEG1;RAB13;ACTB;ROCK1;SNAI2;TJP1;TLN1;ACTG1;TNF;VCL;IRX3;OCEL1;PARD6B;PKP4;CAV1;CLDN10;CLDN1;DLG5;CD9	5.6574	1.99e-17
GOBP_RESPONSE_TO_NUTRIENT	POSTN;COL1A1;CYBB;CYP1B1;DAD1;NQO1;AHCY;A2M;ACSL1;FOLR1;KANK2;GAS6;GATA4;GCLC;GCLM;GNAI2;DCPS;IGFBP2;IL1A;AQP3;LEP;LPL;MAP1B;MGMT;MN1;ATP2B1;PIM1;POR;PTGS2;BCHE;CCND1;SFRP1;SFRP2;SLC16A1;SNAI2;SOD2;SPP1;STC1;TFRC;TSPO;VCAM1;XBP1;CAT;AKR1C3;ALDH1A2;KYNU	5.6574	1.99e-17
GOBP_HOMOTYPIC_CELL_CELL_ADHESION	MYL9;MYL12A;PDPN;CLIC1;COMP;CSRP1;CXADR;DSG2;DSP;FLNA;FN1;ALOX12;GNAS;ANK3;HBB;HSPB1;IL6ST;ILK;JUP;CD99;F11R;PDGFRA;PKP2;PLAUR;PLEK;PPIA;ACTB;CCL5;TLN1;ACTG1;VCL;EMILIN2;PLPP3;ACTN1;CD9;TJP2	7.87942	2.04e-17
GOBP_RESPONSE_TO_ENDOPLASMIC_RETICULUM_STRESS	PDIA6;PIGBOS1;STUB1;RACK1;CLGN;CEBPB;AGR2;SEC61B;TMED2;ERP29;PARK7;CLU;ERP27;UBXN10;CREB3L4;DDX3X;ERN1;UBXN4;PPP1R15A;SDF2L1;SVIP;NUPR1;SERP1;PDIA3;HSPA1A;HSPA5;CXCL8;JUN;MARCKS;DNAJB9;MAP3K5;ATF3;NFE2L2;ATP2A2;P4HB;UBXN1;UFC1;PIK3R1;PMAIP1;DNAJC10;SELENOS;PTPN1;SELENOK;CCND1;BCL2;TMBIM6;THBS1;HSP90B1;XBP1;MANF;CALR;HM13;CANX;SRPX;PPP1R15B;CAV1;MBTPS1;TNFRSF10B;TMEM67;DERL3;EIF2AK3;HERPUD1	4.13356	2.15e-17
GOBP_PROTEASOMAL_PROTEIN_CATABOLIC_PROCESS	TRIB1;STUB1;RACK1;CLGN;GIPC1;SEC61B;PARK7;GABARAP;GABARAPL2;CLU;ANAPC16;PLK3;UBXN10;CTNNB1;DAB2;DNAAF4;UBXN4;TRIM2;RYBP;PRAME;CD2AP;HSPBP1;SDF2L1;CDC26;RNF144B;SVIP;ARIH1;RNF19A;NUPR1;GCLC;UBE2S;ANAPC4;NOP53;HSPA1A;HSPA1B;HSPA5;HSP90AB1;IFI27;APOE;ARRB2;DNAJB9;MDM2;NFE2L2;PCBP2;UBXN1;ANAPC5;ANAPC11;PMAIP1;DNAJC10;SELENOS;PSMA1;PSMA2;PSMA3;PSMA4;PSMA5;PSMA6;PSMA7;PSMB1;PSMB3;PSMB5;PSMB6;PCNP;PSMD8…	2.97325	2.16e-17
GOBP_RIBONUCLEOPROTEIN_COMPLEX_SUBUNIT_ORGANIZATION	EIF3M;CELF2;PTGES3;RUVBL2;PIH1D2;CLNS1A;EIF4B;EIF5;SF3B1;RPL13A;LSM4;RBMX;EIF3K;NOP53;HSP90AA1;HSP90AB1;EIF3E;KIF5B;RPSA;SNU13;RPS27L;EIF3L;SF3B6;LUC7L3;MRPL20;RPL5;RPL6;RPL10;RPL11;RPL23A;RPL24;RPL38;RPLP0;RPS5;RPS14;RPS15;RPS19;RPS27;RPS28;SRSF5;SNRPB;SNRPB2;SNRPC;SNRPD1;SNRPD2;SNRPE;SNRPF;SNRPG;WDR77;DDX39B;SF3B5;RUVBL1;EIF3A;EIF3D;EIF3F;EIF3G;EIF3H;SRSF9;EIF2S2	4.32441	2.24e-17
GOBP_REGULATION_OF_LEUKOCYTE_DIFFERENTIATION	TRIB1;LILRB2;CEBPB;FGL2;NLRP3;CTNNB1;EGR3;EVI2B;FBN1;ZBTB1;FOXJ1;FOXO3;FOS;XRCC6;GAS6;GATA2;PRELID1;TMEM176B;ANXA1;HCLS1;HLA-B;HLA-DRA;HLA-DRB1;HMGB1;ID2;IHH;IL7R;IL10;IL18;IRF1;JUNB;RHOA;LGALS1;LGALS3;LIF;LTF;CD46;MDK;MITF;MMP14;MYC;NEDD9;PNP;PIK3R1;AXL;PTPRC;ACTB;CCL3;PRDM1;VSIR;SFRP1;NFKBIZ;SMARCE1;SOD1;SOX4;ZFP36L1;ZFP36L2;ZEB1;PRDX2;TGFB1;KLF10;TNF;TNFAIP6;TYROBP;XBP1;ZBTB16;PRXL2A;NFKBID;CD…	3.7158	2.26e-17
GOBP_NEGATIVE_REGULATION_OF_PHOSPHORYLATION	HIPK3;TRIB1;SPRY1;CDKN1A;CDKN1C;RACK1;CIB1;HEXIM1;PRDX3;TMED2;PKIG;IRAK3;PARK7;CNKSR3;GADD45A;DUSP1;DUSP6;ENG;C9orf72;FBLN1;DKK1;TRAF3IP1;NUPR1;CHORDC1;PDCD4;SFN;PYCARD;GSTP1;HMGCR;HNRNPU;DNAJA1;HSPB1;APOE;IGFBP3;IL1B;JUN;LRP1;ARRB2;MLLT1;GADD45B;NPM1;DDR2;RTRAF;ERRFI1;DNAJC10;DDIT4;PARP14;PPIA;PPP2R5A;PRKAR1A;PMEPA1;HEG1;PTPN1;PTPRC;RGS2;ROCK1;SAMSN1;SFRP1;SFRP2;DEPTOR;SORL1;STAT3;NR2F2;TGFB1;TH…	3.40709	2.4e-17
GOBP_NEUTROPHIL_MIGRATION	CXCL13;JAML;CSF3R;CXADR;DPP4;EDN1;FCER1G;CXCL1;CXCL2;CXCL3;IL1A;IL1B;IL1R1;CXCL8;ITGB2;LGALS3;MDK;CD99;CKLF;PDE4B;TREM1;PPIA;PPIB;SELENOK;RAC1;RAC2;S100A8;S100A9;S100A12;SAA1;CCL2;CCL3;CCL3L1;CCL4;CCL5;CCL20;CCL21;BSG;TNFAIP6;C3AR1;C5AR1;CD74	6.27566	2.63e-17
GOBP_POSITIVE_REGULATION_OF_INFLAMMATORY_RESPONSE	TNIP1;CEBPB;CTSC;PARK7;NLRP3;C2CD4A;DDT;ALOX5AP;NUPR1;PDCD4;NEAT1;GRN;PYCARD;HLA-E;IL1B;IL6ST;IL18;IDO1;C2CD4B;LDLR;LGALS1;LGALS2;LPL;MDK;MGST2;NFKBIA;NINJ1;OSM;SERPINE1;PLA2G2A;PTGER3;PTGS2;RPS19;S100A8;S100A9;S100A12;CCL3;GPSM3;NFKBIZ;TLR2;TNF;TNFRSF1A;C3;VAMP8;CD47;CD81	5.60495	2.64e-17
GOBP_CELL_MORPHOGENESIS_INVOLVED_IN_NEURON_DIFFERENTIATION	CDH2;CDH11;ACTR2;TUBB3;SEMA6B;SEMA3C;PDLIM5;CFL1;TRIOBP;C12orf57;EMB;CRABP2;CSF1R;CUX1;ARX;DLX5;DPYSL2;EDN1;EDNRA;EFNA1;EPHA2;CTTN;C9orf72;EPHB6;ALCAM;PHACTR1;PALLD;ARC;COBL;FN1;MACF1;PLXNB2;GFRA3;GOLGA4;ANK3;HES1;HSP90AA1;HSP90AB1;APLP2;ID1;IFRD1;APOE;ITGB1;KIF5B;LAMA5;LAMC2;STMN1;CAPRIN1;MAP1B;MBP;NFIB;NR4A2;SHANK1;DCDC2;PLXNB1;PLXNB3;ENAH;MAP2K1;MAP2K2;RELN;SEMA3G;RTN4;PTCH1;PTN;SHTN1;PTPRS;RA…	2.86197	2.94e-17
GOBP_VASCULAR_PROCESS_IN_CIRCULATORY_SYSTEM	KLF2;FERMT2;COMP;ADM;C2CD4A;ADRA2A;ADRA2C;ADRB3;AGTR2;EDN1;EDNRA;EDNRB;FABP5;SLC44A1;DDAH1;GCH1;GJA5;GCLC;GCLM;HBB;APOE;INSR;RHOA;C2CD4B;LEP;LEPR;LRP1;LRP2;MMP2;ATP2B1;SLC38A2;PTGS2;ACTA2;SCPEP1;RGS2;ROCK1;SLC1A1;SLC2A1;SLC2A3;SLC5A3;SLC6A6;SLC7A2;SLC16A1;SLC22A5;SOD1;SOD2;SOD3;TBXAS1;TFRC;TGFB1;TJP1;TNF;VEGFA;DOCK5;SLC7A5;MFSD2A;CAV1;ABCC3;MYLK3;SLC9A3R1;TJP2;CD36;AKAP12	4.03774	3.08e-17
GOBP_SENSORY_ORGAN_DEVELOPMENT	SPRY1;CITED2;CEBPD;KDM5B;IFT27;TRIOBP;PLAAT3;C12orf57;CTHRC1;OSR2;COL4A1;COL5A1;COL5A2;COL8A1;COL11A1;OSR1;CRYBG3;CRYAB;CTNNB1;CYP1B1;DLX5;JAG1;EDN1;EDNRA;EPHA2;HIPK1;STOX1;ALDH1A3;FBN1;EFEMP1;RPGRIP1L;TSPAN12;CLIC4;IFT172;GATA2;GJB2;B9D1;INTU;CRB2;HIF1A;HMGN1;HES1;RBPJ;IHH;INSIG1;JUN;MAF;MEIS2;MITF;MSX1;MYO6;NPHP1;ATP2B1;PBX1;PDGFRA;SERPINF1;PFDN5;PRRX1;BNC2;AHI1;CC2D2A;RCN1;BCL2;RORB;RP1;RPL24;…	2.84203	3.08e-17
GOBP_RECEPTOR_MEDIATED_ENDOCYTOSIS	RAMP1;RAB31;AP2M1;CLU;CLTA;CLTB;ADM;CTSL;ADRB3;DAB2;DPP4;CTTN;FCER1G;DKK1;STAB1;ARC;FOLR1;CD2AP;GRB2;ANXA2;HNRNPK;APOC1;APOE;CXCL8;INSR;ITGAM;ITGB1;ITGB2;ARF1;LDLR;LRP1;LRP2;LRPAP1;M6PR;ARRB2;MRC1;RNASEK;SERPINE1;AHI1;FNBP1L;PPT1;STAB2;B2M;RAC1;BICD1;CCL21;SDCBP;SFRP4;SORL1;TFRC;C3;VEGFA;EZR;CANX;WDR54;CAV1;NUMB;CD9;CD14;CD36;CD63;CD81	4.09206	3.21e-17
GOBP_PEPTIDYL_TYROSINE_MODIFICATION	CD24;HIPK3;RACK1;CLK1;CSF1R;ADRA2A;EFNA1;EPHA2;HIPK1;EPHB6;ERBB3;EREG;PTK2B;EFEMP1;FGF7;FGR;ARL2BP;GAS6;ABL2;HCK;HCLS1;HES1;IGF1;IL6ST;IL18;INSR;ITGA5;ITGB2;AREG;LEP;LIF;ARRB2;MET;MIF;NCL;NEDD9;NEK1;DDR2;OSM;PDGFRA;ENPP2;PKM;ERRFI1;PARP14;AXL;MAP2K1;MAP2K2;MAP2K3;MAP2K6;PRLR;RELN;PTPN1;PTPRC;CCL5;SAMSN1;SFRP1;SFRP2;TGFB1;THY1;TNF;TNFRSF1A;VEGFA;WEE1;DDR1;TPST1;CAV1;PLPP3;NRP1;SOCS3;GPRC5A;PKDCC;A…	3.38458	3.29e-17
GOBP_POSITIVE_REGULATION_OF_CATABOLIC_PROCESS	TOB1;TRIB1;STUB1;RACK1;KCNQ1OT1;PARK7;GABARAP;CLU;PLK3;ADRA2A;DAB2;DAPK1;DCN;ENDOG;C9orf72;PTK2B;FOXO1;FOXO3;TNRC6B;TUT4;HSPBP1;RNF144B;SVIP;ARIH1;RNF19A;TIPARP;ZBTB20;HSPB8;NUPR1;PABPC1;GPC3;LSM1;GCLC;GPD1;DCPS;SLC25A4;MYLIP;SLC25A5;NOP53;HIF1A;HMGB1;HNRNPU;HSPA1A;HSPA1B;HSP90AA1;IGF1;APOE;IL1B;INSR;LDLR;LRP1;LRP2;MDM2;MSN;NFE2L2;YBX1;OAZ1;NDUFA13;SH3GLB1;POLR2G;VPS35;ZC3HAV1;PTPN1;SCOC;GAS5;ROC…	2.92874	3.41e-17
GOBP_REGULATION_OF_NEUROGENESIS	ACTR2;SEMA6B;SEMA3C;CRABP2;CTNNA1;CTNNB1;CUX1;FN1;MACF1;PLXNB2;TMEM98;GOLGA4;ANXA2;HIF1A;HMGB2;HES1;ID1;ID2;ID4;IFRD1;IL1B;IL6ST;ITGB1;LDLR;LIF;LRP2;CAPRIN1;MAP1B;MBP;MDK;MME;NAP1L1;PCM1;SERPINF1;PLXNB1;PLXNB3;FAIM;HES6;MAP2K1;MAP2K2;RELN;B2M;SEMA3G;RTN4;PTN;SHTN1;PTPRS;RHEB;S100A10;CXCL12;SKIL;SORL1;SOX10;SPINT1;SPP1;DYNLT1;TGFB1;TGM2;TSPO;THY1;TLR2;TNF;TNFRSF1B;TP73;VEGFA;WNT2;YWHAH;CXCR4;SEMA3…	3.39617	4.42e-17
GOBP_ORGANIC_CYCLIC_COMPOUND_CATABOLIC_PROCESS	TOB1;DNPH1;IGF2BP2;ALDH1L1;HNRNPA0;KCNQ1OT1;CIRBP;COMT;SLFN13;DDX5;DIO2;DPYSL2;DPYSL3;AHCY;ENDOG;ERN1;ENPP4;TNRC6B;TUT4;QPRT;CARHSP1;EDC4;LSM5;FUS;LSM4;SAMHD1;SERBP1;PABPC1;LSM1;ANG;DCPS;HGD;NT5C;HINT1;HNMT;HNRNPAB;HNRNPC;HNRNPU;APEX1;HSPA1A;HSPA1B;APOE;IDO1;EIF3E;ISG20;ITPA;MAOA;MGAT1;NFE2L2;PNP;NPM1;YBX1;NT5E;MYEF2;DERA;PDE4A;PDE4B;LSM7;ADA2;POLR2G;TET2;RBM38;TENT5A;PNRC2;ZC3HAV1;RNASE6;RNH1;GA…	2.93132	4.69e-17
GOBP_TRANSPORT_ALONG_MICROTUBULE	IFT27;KIF3A;IFT43;LCA5L;LCA5;DYNC1I2;SPAG17;CLUAP1;SYNE2;SUN1;TRAF3IP1;IFT172;BLOC1S1;INTU;IFT81;HIF1A;HNRNPU;HSBP1;HSPA8;HSPB1;KIF5B;ARL3;MAP1B;PCM1;DYNC2LI1;HSPB11;IFT57;ARL8B;IFT46;IFT80;RPGR;BICD1;SFPQ;IFT22;SOD1;DST;STAU1;UBB;DYNC2H1;TTC21B;TTC26;IFT74;FUZ;IFT88;UXT;DYNLL1;BAG3;CDC42	5.2221	5.18e-17
GOBP_MAINTENANCE_OF_LOCATION	COX17;AKAP9;CDS1;EHD1;KDELR1;KDELR2;CORO1A;PARK7;OSBPL11;CLIC2;PLIN2;IGSF11;CYBA;PTK2B;FBN1;FKBP1A;FLNA;SYNE1;SUN1;ARL2BP;FTH1;FTL;NR5A1;ANK3;GSN;ANXA1;HNRNPU;HSPA5;APOE;IL1B;IL10;INSIG1;LCN2;LEP;LMAN1;CHCHD10;ARL2;LPL;LTBP1;SMIM22;NBL1;NFKB1;NFKBIA;VPS13C;SRGN;CCDC88A;TWF1;PTPRC;S100A8;S100A9;CCL3;CCL21;SKP1;SLC18A2;SORL1;SQLE;SRI;TSPO;THY1;TMSB4X;TNF;C3;HSP90B1;TXN;SLC30A2;CALM1;CALM2;CALR;ALKB…	3.55177	6.05e-17
GOBP_BRANCHING_MORPHOGENESIS_OF_AN_EPITHELIAL_TUBE	SPRY1;KDM5B;PHB2;COL4A1;CTNNB1;CTSH;CTSZ;AGTR2;EDN1;EDNRA;EPHA2;ENG;ESR1;CLIC4;GPC3;HOXB7;IHH;ILK;AR;AREG;LAMA5;TACSTD2;MDK;MET;MMP14;MSX2;MYC;PBX1;PGR;WNT4;PPP1CA;LGR4;PTCH1;BCL2;SFRP2;SOX9;STK4;TBX3;HNF1B;TNF;VEGFA;WNT2;DDR1;PAX8;NRP1;DLG5	5.45318	6.09e-17
GOBP_INTRACILIARY_TRANSPORT	IFT27;IFT43;LCA5L;LCA5;CLUAP1;TRAF3IP1;IFT172;INTU;IFT81;ARL3;PCM1;DYNC2LI1;HSPB11;IFT57;IFT46;IFT80;RPGR;IFT22;DYNC2H1;TTC21B;TTC26;IFT74;FUZ;IFT88;DYNLL1	14.8851	6.38e-17
GOBP_MONOCARBOXYLIC_ACID_METABOLIC_PROCESS	AKR1A1;LYPLA1;ECI2;PTGES3;SLC2A6;PARK7;MGLL;ADH1B;ADH5;CRABP2;CYP1B1;CYP4B1;DBI;ECH1;ECHS1;EDN1;ENO1;EPHX1;ETFB;ALDH1A1;FABP5;ACSL1;ACSL3;ACSL4;ALDH1A3;PTGR1;ALOX12;ALOX5AP;MPC2;PNKD;GAPDH;ZBTB20;PHGDH;NUPR1;GPD1;GPX4;GSTP1;ANXA1;HAGH;HIF1A;AOAH;APOC1;IDH2;IGF1;IL1B;IDO1;INSIG1;INSR;LDHA;LDHB;LEP;ARL2;LPL;ASAH1;MIF;NDUFAB1;PAM;PCCA;AIG1;PDK4;ACSL5;PFKL;PGK1;PKM;PLA2G5;PLP1;POR;DDIT4;PTGDS;PTGIS;P…	2.74064	6.43e-17
GOBP_CELLULAR_RESPONSE_TO_INTERLEUKIN_1	TANK;KLF2;CEBPB;IRAK3;EDN1;EGR1;PLCB1;GBP1;GBP2;GBP3;RBMX;PYCARD;HIF1A;HES1;IL1B;IL1R1;IL1RN;CXCL8;IRAK1;IRAK2;MMP2;NFKB1;PTGIS;CCL2;CCL3;CCL3L1;CCL4;CCL5;CCL20;CCL21;SFRP1;SOX9;IL1R2;KMO;MYLK3;RPS6KA5;AKAP12;CD47	6.93339	6.67e-17
GOBP_RESPONSE_TO_INTERFERON_GAMMA	ACTR2;IFITM3;IFITM2;DAPK1;EDN1;AIF1;FLNB;RPL13A;GAPDH;GBP1;GBP2;GBP3;GCH1;GSN;HCK;HLA-DPA1;IRF8;IFNGR1;IRF1;KIF5B;MRC1;PARP14;CCL2;CCL3;CCL3L1;CCL4;CCL5;CCL20;CCL21;SLC11A1;BST2;TLR2;ACTG1;TNF;VIM;WAS;ZYX;IFITM1;KYNU;CLDN1;CD47;CD74;CDC42	5.88968	6.76e-17
GOBP_NEGATIVE_REGULATION_OF_CATABOLIC_PROCESS	TOB1;IGF2BP2;GIPC1;HNRNPA0;IRAK3;PARK7;GABARAPL2;CIRBP;CST3;ADRA2A;FMC1;NQO1;EIF4E;EIF4G2;FLNA;RYBP;FUS;SVIP;GATA4;NUPR1;PABPC1;CHMP4A;NOP53;ANXA2;HMGCR;HNRNPAB;HNRNPC;HNRNPU;HP;HSP90AB1;APOC1;IL1B;IL10;IL10RA;LEP;LEPR;MCL1;MET;YBX1;UBXN1;AZIN1;DDIT4;CTSA;LAPTM4B;RBM38;TENT5A;VPS35;BCL2;ROCK1;RPL5;RPL11;RPS7;SDCBP;SLC11A1;SORL1;STAT3;TSPO;TIMP1;TIMP2;TIMP3;TNF;ZFP36;SLC7A5;SLIRP;CAMLG;MFSD2A;YBX3…	3.582	6.79e-17
GOBP_HOMEOSTASIS_OF_NUMBER_OF_CELLS	CDH2;KLF2;CITED2;CORO1A;FSTL1;SLC15A4;OCIAD2;TSC22D3;GPR183;GAPT;ALAS2;FOXO3;GATA2;SLC25A5;SLC40A1;ANXA1;HCLS1;HIF1A;HMGB1;HMGB2;HOXB6;PRMT1;HSPA1A;HSPA1B;HSPA9;ID2;IL7R;LGALS2;LIPA;SMAD5;MIF;RHEX;PRDX1;PDE4B;TMEM14C;PLA2G2A;PMAIP1;P4HTM;OCIAD1;LGR4;AXL;ST6GALNAC1;KMT2E;B2M;BCL2;RPS6;RPS14;RPS17;RPS19;RPS24;SKIL;SOD1;SOX4;SOX9;SPI1;ZFP36L1;STAT3;PRDX2;TNFAIP3;VEGFA;ZFP36;CAMLG;CRISPLD1;ATP5IF1;CD…	3.78954	7.83e-17
GOBP_DEVELOPMENT_OF_PRIMARY_SEXUAL_CHARACTERISTICS	CITED2;BASP1;CEBPB;PRDX4;ADCYAP1R1;OSR1;CTNNA1;CYP1B1;A2M;EREG;ESR1;FOXO3;NR5A1;TIPARP;GATA4;GATA6;NUPR1;ANG;HMGB2;HOXA10;HSPA5;IL1A;INSR;AR;KCNE1;LEP;LRP2;ARRB2;MMP2;MMP14;NASP;PDGFRA;PGR;WNT4;PTX3;RAB13;PLEKHA1;CCND1;BCL2;SFRP1;SFRP2;BMPR1B;SLIT3;SOD1;SOX9;NR2F2;TMF1;TNFAIP6;UBB;VEGFA;NCOA4;ARID5B;YBX3;AKR1C3;TNFSF10;EIF2S2;ADAMTS1;REC8	4.24977	7.89e-17
GOBP_BONE_DEVELOPMENT	WASF2;CITED2;AKAP13;OSR2;COL1A1;COL3A1;COMP;PHOSPHO1;DLX5;ECM1;ENG;FBN1;FLNA;SULF1;IFT172;GJA1;GNAS;ANXA2;IGF1;IHH;INSIG1;RHOA;LEP;LEPR;LTF;SMAD5;MMP14;MSX1;MSX2;DDR2;OGN;SBDS;PLS3;PLXNB1;POR;PPIB;BNC2;MAP2K6;BBX;IFT80;PTPRC;RPL13;BGN;SFRP4;BMPR1B;SOX9;STC1;TGM2;TWIST1;TYROBP;ZBTB16;VKORC1;ATG9A;TMEM107;COL27A1;SERPINH1;DHRS3	4.31969	7.91e-17
GOBP_ACTOMYOSIN_STRUCTURE_ORGANIZATION	PDCD6IP;WASF2;MYL9;SORBS1;FERMT2;AKAP13;CNN1;CNN3;CSRP1;CSRP2;CCN2;EDN1;ELN;EPB41L2;PTK2B;PHACTR1;EPB41L3;FLNC;RGCC;ITGB1;RHOA;KRT19;RHOC;STMN1;TACSTD2;MET;MYH10;MYH11;F11R;PDGFRA;PFN1;PFN2;PIK3R1;WNT4;CCDC88A;PRKAR1A;RAC1;ROCK1;S100A10;SDC4;SFRP1;TJP1;ACTG1;TPM1;WAS;ZYX;RHPN2;NRP1;CFLAR;PDLIM1;MYLK3;CD47;CDC42	4.62477	8.81e-17
GOBP_POSITIVE_REGULATION_OF_CYSTEINE_TYPE_ENDOPEPTIDASE_ACTIVITY	PDCD6;RACK1;ARL6IP5;NLRP3;CCN2;CTSD;CTSH;DAPK1;DDX3X;F3;MTCH1;FAM162A;BEX3;PYCARD;GSN;HMGB1;HSPD1;HSPE1;IFI16;CCN1;RHOA;MAP3K5;MYC;FIS1;RPS27L;NDUFA13;PMAIP1;CYCS;UACA;IFT57;LGMN;RPS3;S100A8;S100A9;BID;PERP;CLEC7A;SLC1A1;TNF;LAPTM5;TNFSF10;CFLAR;PDCD5;EIF2AK3	5.67365	8.89e-17
GOBP_RESPONSE_TO_INTERLEUKIN_1	TANK;KLF2;CEBPB;CHI3L1;IRAK3;CYBA;TLE5;EDN1;EGR1;PLCB1;GBP1;GBP2;GBP3;GCLC;RBMX;PYCARD;ANXA1;HIF1A;HES1;IL1B;IL1R1;IL1RN;CXCL8;IRAK1;IRAK2;MMP2;NFKB1;PTGIS;CCL2;CCL3;CCL3L1;CCL4;CCL5;CCL20;CCL21;SFRP1;SOX9;IL1R2;KMO;MYLK3;RPS6KA5;AKAP12;CD47	5.829	9.09e-17
GOBP_REGULATION_OF_NITRIC_OXIDE_METABOLIC_PROCESS	KLF2;CLU;AGTR2;EDN1;AIF1;PTK2B;DDAH2;DDAH1;GLA;HBB;HSP90AA1;HSP90AB1;IL1B;IL10;INSR;ASL;SELENOS;PTGIS;PTGS2;PTX3;RAC1;CLEC7A;SOD2;TSPO;TNF;CAV1;KLF4;CD36;CD47	10.5609	1e-16
GOBP_MORPHOGENESIS_OF_EMBRYONIC_EPITHELIUM	CITED2;SPINT2;TMED2;CTHRC1;OSR1;ADM;CTNNB1;ALDH1A3;CLUAP1;SULF1;COBL;FOLR1;PLXNB2;IFT172;HIF1A;AR;LAMA5;LRP2;PFN1;WNT4;IFT57;PTCH1;CC2D2A;SHROOM3;BRD2;RPS7;SDC4;SFRP1;SFRP2;PHACTR4;SOX4;SOX9;SPINT1;STK4;HNF1B;TGFB1;TGFB1I1;TWIST1;VASP;WNT2;PAX8;IRX3;TCTN1;FUZ;ALDH1A2	5.48141	1.12e-16
GOBP_SPECIFICATION_OF_SYMMETRY	CITED2;TMED2;DNAAF1;CFAP52;CTNNB1;DNAAF4;DNAH5;ENG;ENKUR;CFAP53;FOXJ1;CLUAP1;RPGRIP1L;FOLR1;CFAP45;DPCD;IFT172;GAS8;GATA4;DNAI1;HIF1A;CCDC39;DNAAF3;IHH;NBL1;DYNC2LI1;AHI1;CCDC40;IFT57;CC2D2A;RFX3;SOX17;DNAI2;TBX3;DYNC2H1;BICC1;IFT74;TMEM107;OFD1;DNAH11;ALDH1A2;DRC1;HAND2	5.76952	1.22e-16
GOBP_CELLULAR_NITROGEN_COMPOUND_CATABOLIC_PROCESS	TOB1;DNPH1;IGF2BP2;ALDH1L1;HNRNPA0;KCNQ1OT1;CIRBP;SLFN13;DDX5;DPYSL2;DPYSL3;AHCY;ENDOG;ERN1;ENPP4;TNRC6B;TUT4;QPRT;CARHSP1;EDC4;LSM5;FUS;LSM4;SAMHD1;SERBP1;PABPC1;LSM1;ANG;DCPS;NT5C;HINT1;HNMT;HNRNPAB;HNRNPC;HNRNPU;APEX1;HSPA1A;HSPA1B;IDO1;EIF3E;ISG20;ITPA;MGAT1;MPST;PNP;NPM1;YBX1;NT5E;MYEF2;DERA;PDE4A;PDE4B;LSM7;ADA2;POLR2G;POR;TET2;RBM38;TENT5A;PNRC2;ZC3HAV1;RNASE6;RNH1;GAS5;ROCK1;UPF3A;SLC11A1…	3.00151	1.26e-16
GOBP_CELLULAR_LIPID_METABOLIC_PROCESS	ABCA8;CDS1;ST3GAL6;LYPLA1;ECI2;NPC2;PTGES3;PLAAT3;PHB2;MGLL;PTPMT1;ADH1B;ADH5;CRABP2;CSF1R;CYP1B1;CYP4B1;DGKH;DBI;SGMS2;CCDC71L;SPTSSA;DIO2;ECH1;ECHS1;EDN1;EPHX1;ETFB;ALDH1A1;FABP5;ACSL1;ACSL3;ACSL4;ALDH1A3;ALDH3B1;FDFT1;FDPS;PTGR1;PLCB1;SLC44A1;ALOX12;ABCA4;ALOX5AP;FUCA1;SERINC5;GATA6;SH3YL1;GK;GLA;GPD1;ANG;PGP;GPX4;ORMDL2;GSTP1;ANXA1;AOAH;HMGCR;HMGCS1;APOC1;APOD;SERINC2;APOE;CCN1;IL1B;IMPA2;INS…	2.27215	1.39e-16
GOBP_PROTEIN_TARGETING	TOMM6;AP1M2;CIB1;MTX2;GIPC1;SEC61B;YWHAQ;GABARAP;RAB3IP;CLU;SLC51B;ROMO1;ARL6IP1;TRAM1;SEC61G;SAMM50;TIMM13;TIMM8B;ANK3;SPCS1;CHMP4A;DNAJC15;SEC61A1;HSPA5;HSPA8;HSP90AA1;HSPD1;ITGAM;ITGB2;KCNE1;LMAN1;TOMM5;LTBP2;M6PR;NACA;FIS1;NDUFA13;SH3GLB1;TOMM7;LEPROT;VPS13C;RHOU;RAC2;UBL5;RPL11;BID;SDCBP;SLC1A1;BNIP3L;SORL1;SRP9;SRP14;SSR2;SSR3;TSPO;SEC62;UBE2D3;YWHAE;YWHAZ;LAPTM5;NCOA4;ZFAND2A;PDCD5;ATP5IF1…	3.60336	1.4e-16
GOBP_REGULATION_OF_TRANSMEMBRANE_RECEPTOR_PROTEIN_SERINE_THREONINE_KINASE_SIGNALING_PATHWAY	TOB1;SPRY1;STUB1;CDKN1C;CITED2;GIPC1;FSTL1;VASN;LRG1;CSNK2B;DAB2;ENG;FBN1;FKBP1A;DKK1;SULF1;FOLR1;FAM89B;GATA4;GATA6;GPC3;CRB2;HES1;HSPA1A;HSPA5;HSP90AB1;CCN1;RBPJ;ILK;ITGA3;LRP1;LRP2;LTBP1;MSX1;MSX2;NBL1;CRIM1;ASPN;C20orf27;HTRA1;PMEPA1;SINHCAF;RBBP4;RBBP7;SDCBP;SFRP1;SFRP2;SFRP4;SKIL;SORL1;ZEB1;TGFB1;TGFB1I1;LEFTY2;THBS1;TNFAIP6;UBE2D3;FBXL15;LTBP4;CILP;CAV1;CHRDL1;NREP;GDF15;ZEB2	3.7805	1.46e-16
GOBP_ANTIGEN_PROCESSING_AND_PRESENTATION	LILRB2;IFI30;FGL2;CTSD;CTSH;CTSL;CTSS;FCER1G;PYCARD;PDIA3;HLA-A;HLA-B;HLA-C;HLA-DMA;HLA-DMB;HLA-DPA1;HLA-DPB1;HLA-DQA1;HLA-DQA2;HLA-DQB1;HLA-DRA;HLA-DRB1;HLA-DRB5;HLA-E;ICAM1;ARL8B;LGMN;B2M;PSME1;CCL21;SLC11A1;THBS1;WAS;CALR;RAB34;CD68;CD74	6.94189	1.64e-16
GOBP_REGULATION_OF_MUSCLE_SYSTEM_PROCESS	AKAP9;MYL9;CHGA;C12orf57;FBXO32;CLIC2;CNN1;MTPN;CCN2;ADRA2A;ADRA2C;DSG2;DSP;EDN1;AIF1;CTTN;ENO1;PI16;FOXO1;FOXO3;GATA4;GJA5;RANGRF;LMCD1;NR4A1;HSP90AA1;IGF1;IGFBP5;IL6ST;JARID2;JUP;RHOA;LMNA;ATP1A1;ATP1B1;ATP2A2;ATP2B1;PDE4B;PKP2;ERRFI1;PTGS2;TWF1;RGS2;RGS4;ROCK1;SCN4A;SOD1;SRI;STC1;TNFRSF1A;TNFRSF1B;TPM1;SUMO1;DOCK5;CALM1;NR4A3;CALM2;CAV1;SPHK1;HAND2	4.03867	1.67e-16
GOBP_REGULATION_OF_EPITHELIAL_CELL_MIGRATION	PDCD6;CIB1;CXCL13;CSNK2B;CTSH;DCN;GADD45A;AGTR2;EDN1;EFNA1;EPHA2;PTK2B;FGF7;MACF1;GATA2;GLUL;GRN;RGCC;ANXA1;ANXA3;HIF1A;HMGB1;HSPB1;APOE;ITGA3;JUN;JUP;RHOA;RHOB;TACSTD2;MET;NFE2L2;ATP5F1A;ATP5F1B;ENPP2;SERPINF1;PFN1;PFN2;DNAJA4;MAP2K3;LGMN;ADAMTS9;RAB25;RTN4;PTGS2;PTN;RAC1;RRAS;SOX9;SPARC;STC1;NR2F2;TGFB1;THBS1;TMSB4X;TNF;VEGFA;DOCK5;CALR;PLPP3;IRS2;RAB11A;NRP1;SEMA5A;KLF4	3.76385	1.75e-16
GOBP_TUBE_FORMATION	CITED2;SPINT2;SDCCAG8;TMED2;CTHRC1;OSR1;ADM;CTNNB1;CLUAP1;COBL;FOLR1;PLXNB2;IFT172;HIF1A;LRP2;NFIB;PFN1;PODXL;WNT4;IFT57;PTCH1;CC2D2A;SHROOM3;BRD2;RPS7;SDC4;SFRP1;SFRP2;PHACTR4;SOX4;SOX9;SPINT1;STK4;HNF1B;TGFB1;TGM2;TWIST1;VASP;VEGFA;YWHAZ;PAX8;IRX3;TCTN1;CEP290;FUZ	5.38171	1.94e-16
GOBP_INTRINSIC_APOPTOTIC_SIGNALING_PATHWAY_IN_RESPONSE_TO_DNA_DAMAGE	CDKN1A;CLU;CRIP1;EPHA2;HIPK1;NUPR1;SFN;PYCARD;HIC1;HNRNPK;IFI16;MCL1;MIF;MUC1;RPS27L;PIK3R1;DDIT4;USP47;FNIP2;BCL2;BCL2A1;RPL26;RPS3;BID;CXCL12;SFRP2;SKIL;SNAI2;SOD2;TNF;TNFRSF1A;TNFRSF1B;TP73;TPT1;CD44;CD74	7.16198	1.97e-16
GOBP_ORGANIC_HYDROXY_COMPOUND_METABOLIC_PROCESS	AKR1A1;CPQ;NPC2;GIPC1;PARK7;ADCYAP1R1;SLC16A10;ADH1B;ADH5;COMT;MTPN;CTSB;CTSK;CYP1B1;DAB2;DDT;SPTSSA;NQO1;DIO2;EDNRA;EDNRB;ALDH1A1;ALDH2;PTK2B;ALDH1A3;ALDH3B1;FDFT1;FDPS;FDXR;PTGR1;PLCB1;ALOX12;PNKD;GCH1;GK;GPD1;PGP;HAGH;HDLBP;HIF1A;HMGCR;HMGCS1;APOC1;IDH2;IGF1;APOE;IMPA2;INSIG1;ITGAM;ITGB2;LDHA;LDHB;LDLR;LEP;LEPR;LIPA;LRP2;MAOA;ASAH1;ASIP;NFKB1;NR4A2;PCBD1;LIMA1;CYB5R1;PLEK;PLTP;DPM3;WNT4;POR;VP…	2.81594	2.05e-16
GOBP_GLIOGENESIS	CDH2;CLU;COL3A1;CSF1R;APCDD1;CTNNB1;GPR183;ERBB3;PTK2B;SYNE2;SUN1;TMEM98;PHGDH;GPR17;GRN;ANXA1;HES1;ID2;ID4;IFNGR1;IL1B;IL6ST;ILK;ITGB4;AREG;RHOA;LAMB1;LDLR;LEPR;LIF;LRP1;LRP2;MDK;MMP14;NFIB;PLP1;MXRA8;MAP2K1;RELN;RTN4;PTN;RHEB;RRAS;S100A8;S100A9;CCL2;CCL3;SOD1;SOX4;SOX9;SOX10;SPINT1;STAT3;TGFB1;TSPO;TLR2;TNF;TNFRSF1B;TP73;C5AR1;VIM;CXCR4;METRN;TTC21B;SLC7A5;PLPP3;CD9	3.65654	2.06e-16
GOBP_STRIATED_MUSCLE_TISSUE_DEVELOPMENT	CITED2;SEMA3C;PDLIM5;AKAP13;COL11A1;MTPN;CXADR;DSG2;DSP;EDN1;EDNRA;ENG;ERBB3;EYA2;PI16;FKBP1A;DKK1;KDM6B;CBY1;GATA4;GATA6;GJA1;GJA5;HNRNPU;PRMT1;ID2;IFRD1;IGF1;RBPJ;ITGB1;JARID2;LMNA;LRP2;ARRB2;SMAD5;MSX1;MSX2;MYH11;NDUFV2;PDGFRA;PIM1;PKP2;PRKAR1A;ADAMTS9;HEG1;RGS2;RGS4;TBX3;TGFB1;TP73;TPM1;TWIST1;VEGFA;WNT2;IRX3;CALR;SORBS2;ALDH1A2;MYLK3;CDC42	3.99773	2.46e-16
GOBP_STRIATED_MUSCLE_CELL_DIFFERENTIATION	CDH2;MYL9;PDLIM5;EHD1;ADAMTS5;AKAP13;MTPN;CSRP1;CSRP2;CXADR;RCAN1;EDN1;PI16;DKK1;KDM6B;FLNC;ATP11A;CBY1;GATA4;GATA6;MYOF;HNRNPU;IGF1;IGFBP5;RBPJ;ITGB1;KRT19;LMNA;ARRB2;MMP14;MSX1;MYH11;YBX1;MYEF2;PDGFRA;RBM38;PRKAR1A;BCL2;RGS2;RGS4;NIBAN2;KLF5;TBX3;TGFB1;ACTG1;TPM1;VEGFA;XBP1;IRX3;BHLHE41;DOCK5;ADAM12;CALR;CAPN2;SORBS2;CFLAR;SPAG9;MYLK3;SCGB3A1;CD9;HOMER1;GDF15;CD53;MORF4L2;CD81	3.731	2.49e-16
GOBP_ANTIGEN_RECEPTOR_MEDIATED_SIGNALING_PATHWAY	IGHV1-69D;BTNL9;ELF1;FYB1;GBP1;IGHV6-1;IGHV5-51;IGHV4-61;IGHV4-59;IGHV4-39;IGHV4-34;IGHV4-4;IGHV3-74;IGHV3-53;IGHV3-49;IGHV3-48;IGHV3-33;IGHV3-30;IGHV3-23;IGHV3-21;IGHV3-20;IGHV3-15;IGHV3-13;IGHV3-11;IGHV3-7;IGHV2-5;IGHV1-18;IGHV1-3;GPS2;PHPT1;HLA-A;HLA-DPB1;HLA-DQB1;HLA-DRB1;IGHA1;IGHA2;IGHG1;IGHG2;IGHG4;IGHM;IGKC;LCP2;LGALS3;MNDA;PAWR;PDE4B;PTPRC;NECTIN2;PLEKHA1;BCL2;RPS3;NFKBIZ;THY1;EZR;LAPTM5…	4.11218	2.67e-16
GOBP_SEX_DIFFERENTIATION	CITED2;BASP1;CEBPB;PRDX4;ADCYAP1R1;OSR1;CTNNA1;CTNNB1;CYP1B1;A2M;EREG;ESR1;FOXO3;NR5A1;TIPARP;GATA4;GATA6;NUPR1;ANG;HMGB2;HOXA10;HSPA5;IL1A;INSR;AR;KCNE1;LEP;LRP2;ARRB2;SMAD5;MMP2;MMP14;NASP;PBX1;PDGFRA;PGR;WNT4;LGR4;AXL;PTX3;RAB13;PLEKHA1;CCND1;BCL2;SFRP1;SFRP2;BMPR1B;SLIT3;SOD1;SOX9;TBX3;NR2F2;TMF1;TNFAIP6;UBB;VEGFA;NCOA4;ARID5B;YBX3;AKR1C3;TNFSF10;EIF2S2;ADAMTS1;REC8	3.77125	2.72e-16
GOBP_CONNECTIVE_TISSUE_DEVELOPMENT	NAMPT;PLAAT3;CHI3L1;OSR2;COL1A1;COL3A1;COL5A1;COL11A1;OSR1;COMP;CRIP1;SELENOM;CCN2;CTNNB1;CTSK;ECM1;EDN1;EGR1;EFEMP1;SULF1;HIF1A;ID4;CCN1;IHH;ITGB8;LEP;SMAD5;MAF;MDK;MGP;MSX1;MSX2;NFIB;OGN;PRRX1;POR;IFT80;ACTA2;BGN;SFRP2;BMPR1B;SNAI2;SORL1;SOX9;SPI1;STC1;ZEB1;TGFB1;TGFBI;TIMP1;UBB;XBP1;ZBTB16;ARID5B;COL27A1;SERPINH1;CFLAR;PKDCC;EIF2AK3;HAND2;CD44;ZNF516	3.85865	3.18e-16
GOBP_REGULATION_OF_INTRACELLULAR_PROTEIN_TRANSPORT	CIB1;PKIG;PARK7;SLC51B;PLK3;FLNA;SVIP;GAS6;SFN;ANK3;HCLS1;HSP90AA1;HSP90AB1;IFI27;APOD;IL1B;INSIG1;ITGAM;ITGB2;JUP;KCNE1;LCP1;LEP;LMAN1;OAZ1;FIS1;PCM1;SH3GLB1;ERGIC3;PIK3R1;TOMM7;LEPROT;PTGS2;PTPN1;RHOU;RAC2;RAN;UBL5;SLC1A1;BNIP3L;SORL1;TGFB1;TXN;UBE2D3;SUMO1;YWHAE;CEP290;DERL3;PDCD5;ATP5IF1;CD36;BAG3;GCC2;CD81;CDH1	4.28917	3.45e-16
GOBP_TISSUE_HOMEOSTASIS	CORO1A;COL3A1;DRAM2;COMP;CLDN3;CSF1R;CCN2;CTNNB1;CTSH;CTSK;CXADR;NXNL2;LCA5;ALDH1A1;PTK2B;ABCA4;GATA2;GJA1;CRB2;HSPB1;IGHA1;IGHA2;IGKC;IHH;ITGB1;LIPA;LTF;LYZ;MBP;MUC6;PRDX1;F11R;PDK4;PIGR;IL20RA;MUC13;B2M;PTGS2;BCL2;ACTB;RP1;SLC39A8;SLC1A1;SLC2A1;SLC22A5;SOD1;SOX9;SPP1;TFF3;TFRC;TJP1;ACTG1;TNFAIP3;VCL;VEGFA;LPCAT1;MFSD2A;PROM1;CLDN1;TJP2;HOMER2;HOMER1	3.84047	3.82e-16
GOBP_ENDOTHELIAL_CELL_MIGRATION	PDCD6;CIB1;CXCL13;GIPC1;FSTL1;CSNK2B;CYP1B1;DCN;GADD45A;DPP4;AGTR2;EDN1;EFNA1;EGR3;EPHA2;PTK2B;GATA2;GLUL;GRN;RGCC;ANXA1;ANXA3;HIF1A;HMGB1;NR4A1;HSPB1;ID1;APOE;ITGB1;JUP;RHOA;RHOB;MET;NFE2L2;ATP5F1A;ATP5F1B;SERPINF1;DNAJA4;MAP2K3;PRKX;LGMN;ADAMTS9;PTGS2;PTN;RAB13;RAC1;RRAS;S100A2;SNAI2;SPARC;STC1;NR2F2;TGFB1;THBS1;TMSB4X;TNF;VEGFA;CALR;PLPP3;NRP1;SEMA5A;KLF4;LPXN	3.77893	4.24e-16
GOBP_PROTEIN_LOCALIZATION_TO_NUCLEUS	DNAJB6;CDKN1A;LAMTOR5;TXNIP;FERMT2;PKIG;PARK7;PHB2;COL1A1;CTNNA1;FLNA;SYNE1;SUN1;ARL2BP;CD2AP;NR5A1;TMEM98;GBP2;GLUL;RANGRF;NOP53;HCLS1;HDGF;HNRNPU;HSP90AA1;HSP90AB1;APOD;JUP;LEP;LIF;LMNA;CHCHD10;ARL2;MDM2;MSX1;NFKBIA;NPM1;PIK3R1;NUP62CL;PPP1R10;PTGS2;RAN;RANBP2;RPL11;SKP1;SOX9;STAT3;STK4;TCP1;TFRC;TGFB1;CCT3;TXN;SUMO1;YWHAE;PTTG1IP;ZBTB16;CALR;RASSF5;SQSTM1;CCT6A;RPL23;EIF2AK3;CD36;BAG3;CDH1	3.63097	4.53e-16
GOBP_RESPONSE_TO_ALCOHOL	ACTR2;KLF2;ADCYAP1R1;CLDN3;CLDN7;CTNNA1;CTNNB1;CTSK;CYBA;CYBB;CYP1B1;NQO1;AHR;A2M;EPS8;PTK2B;FOXO3;FOS;FOSB;IGFBP7;JUP;RHOA;LEP;MGMT;MT-ND4;RPL10A;ATP2B1;ATP5F1A;GRAMD1C;PTCH1;PTGER2;CCND1;RGS2;RGS4;RPL15;RPL27;RPLP0;RPS4X;S100A8;SCNN1A;CCL3;CCL21;SFRP1;SGK1;SLIT3;SOD1;SOD2;KLF9;TBXAS1;TGFB1;TSPO;TNF;TUFM;VCAM1;CAT;AKR1C3;CLDN1;CD14;CDH1	3.99057	4.61e-16
GOBP_REGULATION_OF_PROTEIN_LOCALIZATION_TO_MEMBRANE	CDH2;RACK1;LYPLA1;CIB1;AGR2;SORBS1;AP2M1;SLC51B;LRRC15;DAB2;EPHA2;ACSL3;GBP1;GPC3;ANK3;RANGRF;GSN;AR;ITGA3;ITGAM;ITGB1;ITGB2;KCNE1;KIF5B;LGALS3;LRP1;MMP14;FIS1;PIK3R1;LZTFL1;PPP2R5A;RAP1A;ACTB;SLC1A1;SLC5A3;SPTBN1;TGFB1;TNF;TNFAIP6;EZR;NUMB;VAMP8;SQSTM1;PDCD5;PKDCC;TMEM59;CD81	4.94766	5.72e-16
GOBP_REGULATION_OF_SECRETION	PDCD6IP;GIPC1;KDM5B;ERP29;CHGA;ADRA2A;ADRA2C;CYBA;DAB2;EDN1;EDNRB;ERBB3;ACSL3;ACSL4;FGR;FOXO1;CD2AP;MPC2;PNKD;GATA2;GJA1;SERP1;CHMP2A;GLUL;GNAI2;ANG;RGCC;ANXA1;ANXA2;HIF1A;HLA-DRB1;HMGCR;ICA1;IGF1;APOE;IL1A;IL1B;ITGAM;ITGB2;LEP;LIF;LLGL2;PIM3;MIF;MYH10;MYO6;SEPTIN2;ATP2A2;OSM;PAM;PFKL;PFN2;SLC38A2;PPIA;PPID;VPS35;MAP2K6;PTGER3;RAB13;RAC2;RAP1A;RAP1B;RFX3;S100A8;S100A10;SAA1;CCL5;SDC4;SDCBP;CXCL12…	2.64526	6.78e-16
GOBP_CELLULAR_RESPONSE_TO_UNFOLDED_PROTEIN	PIGBOS1;STUB1;RACK1;AGR2;TMED2;PACRG;CREB3L4;DAXX;ERN1;PPP1R15A;HSPB8;SERP1;HSPA1A;HSPA1B;HSPA5;HSPA6;HSPA8;HSPA9;HSPD1;DNAJB9;ATF3;NFE2L2;PIK3R1;DNAJC10;SELENOS;PTPN1;CCND1;TMBIM6;XBP1;PPP1R15B;MBTPS1;DERL3;EIF2AK3;BAG3;HERPUD1	7.06803	6.92e-16
GOBP_TRANSLATIONAL_INITIATION	EIF1;EIF1B;EIF3M;TMED2;DDX3X;EIF1AX;EIF4A1;EIF4A2;EIF4B;EIF4E;EIF4G2;EIF5;RPL13A;PPP1R15A;EIF3K;HSPB1;EIF3E;NPM1;PAIP2;EIF3L;POLR2G;PPP1CA;RBM4;RPS3;RPS3A;RPS5;RPS17;CCL5;TNF;PPP1R15B;EIF3A;EIF3D;EIF3F;EIF3G;EIF3H;EIF2S2;EIF2AK3;EIF5B;BZW1	6.10012	7.25e-16
GOBP_POSITIVE_REGULATION_OF_PROTEIN_CONTAINING_COMPLEX_ASSEMBLY	ARPC2;AKAP9;STUB1;RACK1;CXCL13;CDC42EP3;FERMT2;PARK7;CLU;DDX3X;CTTN;ESR1;PTK2B;GRB2;PYCARD;HCK;HSPA1A;HSPA1B;HSP90AA1;RHOA;RHOC;LCP1;LGALS3;ARL2;MAP1B;MET;MSN;SH3GLB1;TPPP3;PFN1;PFN2;PLEK;BRK1;FNIP2;SLAIN2;RAC1;RAP1B;RPS3;CCL21;BID;CLEC7A;TFRC;TGFB1;TNF;SUMO1;VASP;VEGFA;MED25;CD36;PDE4DIP	4.60346	7.32e-16
GOBP_REGULATION_OF_NEURON_PROJECTION_DEVELOPMENT	CDH2;ACTR2;SEMA6B;SEMA3C;CIB1;PDLIM5;CFL1;EHD1;CRABP2;CUX1;DAB2;DPYSL3;EFNA1;PTK2B;DKK1;FLNA;ARC;COBL;DENND5A;FN1;MACF1;PLXNB2;NEGR1;ABL2;GOLGA4;RAPGEF1;GRN;MYLIP;HES1;HSPA5;ID1;IFRD1;APOE;ITGA6;ITGA3;RHOA;CAPRIN1;MAP1B;MBP;MDK;NFE2L2;SERPINF1;PLXNB1;PLXNB3;PMP22;PRRX1;ULK4;CCDC88A;MAP2K1;MAP2K2;RELN;B2M;SEMA3G;RTN4;TWF1;PTN;SHTN1;PTPRF;PTPRS;RAP1A;RGS2;S100A9;SDC2;CXCL12;SFRP1;SFRP2;SKIL;SPP1;NR…	3.02673	8.37e-16
GOBP_SIGNAL_TRANSDUCTION_BY_P53_CLASS_MEDIATOR	CDKN1A;HEXIM1;PLK3;DDX5;EIF5A;HIPK1;FOXO3;NUPR1;PYCARD;NOP53;HIC1;HINT1;HNRNPK;IFI16;MDM2;MIF;MLF1;MSX1;MUC1;MYC;MYO6;NPM1;RRM2B;RPS27L;PMAIP1;DDIT4;MAP2K6;BCL2;RPL5;RPL11;RPL26;RPL37;RPS7;RPS15;RPS20;PERP;SGK1;SNAI2;SOX4;TP73;TWIST1;UBB;PTTG1IP;RPL23;EEF1E1;CD44;CD74	4.86951	9.32e-16
GOBP_REGULATION_OF_NERVOUS_SYSTEM_DEVELOPMENT	ACTR2;SEMA6B;SEMA3C;CTSC;CRABP2;CTNNA1;CTNNB1;CUX1;DKK1;FN1;MACF1;PLXNB2;TMEM98;GOLGA4;ANXA2;HIF1A;HMGB2;HES1;ID1;ID2;ID4;IFRD1;IL1B;IL6ST;ITGAX;ITGB1;LDLR;LIF;LRP2;CAPRIN1;MAP1B;MBP;MDK;MME;NAP1L1;PCM1;SERPINF1;PLXNB1;PLXNB3;FAIM;HES6;MAP2K1;MAP2K2;RELN;B2M;SEMA3G;RTN4;PTN;SHTN1;PTPRS;RHEB;S100A10;CXCL12;CLSTN2;SKIL;SORL1;SOX10;SPINT1;SPP1;DYNLT1;TGFB1;TGM2;THBS2;TSPO;THY1;TLR2;TNF;TNFRSF1B;TP73…	2.98941	1.04e-15
GOBP_REGULATION_OF_MRNA_METABOLIC_PROCESS	TOB1;MBNL2;SRRM1;SAP18;DDX17;IGF2BP2;CELF2;AHCYL1;PAPOLA;HNRNPA0;CIRBP;CLNS1A;DDX5;TNRC6B;TUT4;CARHSP1;FUS;SERBP1;PABPC1;LSM1;RBMX;DCPS;TRA2A;HNRNPA1;HNRNPA2B1;HNRNPAB;HNRNPC;HNRNPK;HNRNPU;APEX1;HSPA8;MBNL1;NCL;NPM1;YBX1;MYEF2;POLR2G;RBM38;TENT5A;ZC3HAV1;RBM25;RBM3;RBM4;ROCK1;SRSF2;SRSF3;SRSF7;TRA2B;SLC11A1;SON;ZFP36L1;ZFP36L2;VIM;ZFP36;BTG2;WDR77;FXR1;YBX3;SRSF9;PABPC4;QKI;RBM39;PRDX6;WTAP;EIF4A…	3.55642	1.05e-15
GOBP_FAT_CELL_DIFFERENTIATION	CDS1;CEBPB;CEBPD;ADIRF;FERMT2;CCDC85B;OSBPL11;LRG1;ADRB3;CCDC71L;DIO2;JAG1;FOXO1;PLCB1;CBY1;GATA2;GPS2;AAMDC;NR4A1;HNRNPU;HES1;ID2;ID4;INSIG1;LAMB3;LEP;LPL;MMP11;MSX2;NR4A2;PDGFRA;PIM1;RETREG1;PTGS2;RARRES2;CCND1;RGS2;SFRP1;SFRP2;SNAI2;SOD2;ZFP36L1;ZFP36L2;STK4;KLF5;TGFB1;TGFB1I1;TNF;XBP1;ZFP36;ZBTB16;NR4A3;ARID5B;MEDAG;KLF4;SYAP1;ZNF516	4.01835	1.1e-15
GOBP_ENDOTHELIAL_CELL_DEVELOPMENT	COL15A1;CLDN3;EDNRA;EDNRB;PLCB1;CLIC4;RAPGEF1;GSTM3;ICAM1;IL1B;MET;AFDN;MSN;F11R;HEG1;RAP1A;RAP1B;ROCK1;STC1;TJP1;TNF;TNFRSF1A;VCL;VEGFA;EZR;COL18A1;CLDN1;MYADM;TJP2	9.27231	1.14e-15
GOBP_CELLULAR_ION_HOMEOSTASIS	SLC34A2;CORO1A;CKB;CLIC2;CP;CYB561;CYBA;EDN1;EDNRA;ALAS2;PTK2B;FKBP1A;FLNA;PRND;FTH1;FTL;CLIC4;GRN;SLC40A1;HIF1A;APOE;IL1A;ARF1;LCN2;RNASEK;MT1E;MT1F;MT1G;MT1H;MT1M;MT1X;MT2A;MYC;ATOX1;ATP1A1;ATP1B1;ATP1B3;ATP2A2;ATP2B1;ATP5F1B;FIS1;ATP6V1D;ATP6V1A;ATP6V1B2;ATP6V0C;ATP6V0B;PPT1;TMEM165;PTPRC;SELENOK;BCL2;S100A8;S100A9;SCNN1A;CCL3;CCL5;CCL21;CXCL12;SLC39A8;SLC1A1;SLC11A1;SOD1;SRI;STC1;TBXAS1;TMBIM…	2.83099	1.24e-15
GOBP_INTRACELLULAR_RECEPTOR_SIGNALING_PATHWAY	KLF2;CITED2;DDX17;PTGES3;PARK7;PHB2;SLC15A4;DCBLD2;SRARP;DAB2;DNAAF4;DAXX;DDX5;AHR;ESR1;FABP5;PRAME;NR5A1;KANK2;GPS2;NOP53;NR4A1;BIRC3;DNAJA1;HSPA1A;HSPA1B;AR;RHOA;LEP;SCGB2A1;MN1;NFKBIA;NR4A2;PER1;PGR;PIM1;MAP2K6;PMEPA1;PTGIS;RORB;SEC14L1;SFRP1;SNAI2;STAT3;NR2F1;NR2F2;TSPAN6;TMF1;TNFAIP3;TWIST1;YWHAH;NR4A3;NCOA4;ACTN4;CALR;LBH;PLPP1;AKR1C3;ALDH1A2;DHRS3	3.82239	1.33e-15
GOBP_CELLULAR_RESPONSE_TO_ABIOTIC_STIMULUS	TANK;CDKN1A;NET1;MAP3K2;RUVBL2;NLRP3;CARD16;COL1A1;MTPN;CRIP1;CRYAB;COPS9;CYBA;GADD45A;DDX3X;EEF1D;EGR1;ENG;ZBTB1;XRCC6;GCLC;GRB2;PYCARD;HSPA5;IFI16;IL1B;IRF1;KCNE1;RHOB;GTF2H5;MDM2;MFAP4;MGMT;MME;MMP2;MYC;NFKB1;NPM1;F11R;MAP3K20;SERPINB6;PIK3R1;ERRFI1;SLC38A2;PPID;USP47;PTGS2;RP1;RPL26;SCNN1A;PIEZO2;SFRP1;SFRP2;NUCKS1;SLC2A1;SNAI2;SOX9;ZFP36L1;TSPO;TIMP1;TNFRSF1A;EFHD1;CALR;YBX3;TNFRSF10B;CCND2;…	3.41324	1.39e-15
GOBP_GASTRULATION	RACK1;COL4A2;COL5A1;COL5A2;COL6A1;COL8A1;COL11A1;COL12A1;OSR1;CTNNB1;DUSP1;DUSP2;EPHA2;ETS2;EYA2;DKK1;KDM6B;FN1;SYF2;GATA6;GJA1;GPC3;CRB2;GRB2;HSBP1;IL1RN;IL10;ITGA3;ITGA5;ITGB1;ITGB2;ITGB4;LAMB1;LAMB3;MBP;MMP2;MMP14;PRKAR1A;MAP2K1;RPS6;SFRP1;SFRP2;SOX17;HNF1B;UGDH;WLS;NR4A3;PLPP3;MYADM;KLF4	4.50856	1.44e-15
GOBP_REGIONALIZATION	SPRY1;CITED2;BASP1;SEMA3C;TMED2;DNAAF1;PIFO;OSR1;CTNNB1;EDN1;DZIP1L;EMX2;HIPK1;ETS2;DKK1;FOXJ1;CLUAP1;ARC;COBL;RPGRIP1L;DPCD;IFT172;GATA4;INTU;GPC3;CRB2;HOXA10;HOXB5;HOXB6;HOXB7;HES1;RBPJ;AR;ITGAM;LAMA5;LRP2;MSX1;MSX2;NBL1;PBX1;HSPB11;AHI1;IFT57;MNS1;HES6;RELN;PTCH1;SFRP1;SFRP2;SOX17;TRA2B;BMPR1B;TBX3;HNF1B;NR2F2;C3;WNT2;ZBTB16;BTG2;PAX8;FBXL15;IRX3;BHLHE41;TCTN1;DYNC2H1;TTC21B;WLS;FUZ;TMEM107;BH…	3.30348	1.44e-15
GOBP_ANTIGEN_PROCESSING_AND_PRESENTATION_OF_PEPTIDE_OR_POLYSACCHARIDE_ANTIGEN_VIA_MHC_CLASS_II	IFI30;CTSD;CTSL;CTSS;FCER1G;PYCARD;HLA-DMA;HLA-DMB;HLA-DPA1;HLA-DPB1;HLA-DQA1;HLA-DQA2;HLA-DQB1;HLA-DRA;HLA-DRB1;HLA-DRB5;ARL8B;LGMN;B2M;THBS1;CD74	18.314	1.56e-15
GOBP_REGULATION_OF_RESPONSE_TO_BIOTIC_STIMULUS	TRIB1;HEXIM1;FGL2;IRAK3;CARD16;SLC15A4;CYBA;CD55;DAPK1;AHR;A2M;EREG;FCN1;FGR;LY96;CADM1;XRCC6;SAMHD1;TRAF3IP1;GATA6;GRN;PYCARD;NOP53;HCK;CFH;HLA-A;HLA-B;HLA-DRB1;HLA-E;HMGB1;HMGB2;BIRC3;HSP90AA1;HSPD1;IFI16;APOE;IL1B;IRF1;ARG2;LEP;LTF;ARRB2;MIF;MNDA;NFE2L2;PCBP2;SERPINB9;PLA2G5;PLSCR1;PARP14;TRIM44;HTRA1;PTPN1;NECTIN2;SELENOK;RPS19;CCL5;SEC14L1;SFPQ;CLEC7A;SPI1;PRDX2;SERPING1;TSPAN6;TNFAIP3;TYROB…	3.29197	1.68e-15
GOBP_REGULATION_OF_MITOTIC_CELL_CYCLE	CDKN1A;CDK2AP2;CDKN1C;GPNMB;BTG3;PHB2;CKS2;ANAPC16;PLK3;CTNNB1;DDX3X;DUSP1;EDN1;EIF4E;AIF1;EREG;STOX1;PLCB1;CDC26;SYF2;KANK2;GAS1;RGCC;GPR132;ANAPC4;NOP53;ANXA1;HNRNPU;APEX1;HES1;ID2;IGF1;IK;IL1A;IL1B;IL10;INSR;PIM3;MDM2;MEIS2;MUC1;DDR2;RRM2B;PBX1;GMNN;RPS27L;TAOK3;ANAPC5;ANAPC11;MAP3K20;AURKAIP1;USP47;PPP1R10;KMT2E;LGMN;PSME1;PSME2;PTCH1;RBBP8;CCND1;BCL2;ACTB;RPA3;RPL26;CCL2;BID;SDCBP;NABP1;STK3…	2.81054	1.79e-15
GOBP_CHAPERONE_MEDIATED_PROTEIN_FOLDING	DNAJB6;PTGES3;HSPH1;DNAJB4;CLU;HSPB6;FKBP1A;FKBP2;FKBP5;SDF2L1;CHORDC1;HSPA1A;HSPA1B;HSPA5;HSPA6;HSPA8;HSPA9;HSPB1;HSPE1;DNAJB1;DNAJB13;PPIB;PPID;ST13;TCP1;CCT3;CCT6A;PDCD5;CD74	9.05141	1.79e-15
GOBP_PLACENTA_DEVELOPMENT	DNAJB6;CITED2;CEBPB;SPINT2;PRDX3;TMED2;ADM;CTSB;TCF23;GATA2;GJB2;ANG;GRB2;HIF1A;HES1;HSP90AB1;CCN1;RBPJ;IL10;ITGB8;JUNB;KRT19;LEP;LIF;MME;TPPP3;MAP2K1;HTRA1;PTGS2;PTN;RPS6;PRDM1;SOD1;SPINT1;SPP1;ZFP36L1;STC1;STK4;BSG;NR2F2;PHLDA2;WNT2;SOCS3	5.23431	1.93e-15
GOBP_FIBROBLAST_PROLIFERATION	CDKN1A;IFI30;PTGES3;MORF4L1;CKS2;COL3A1;CTNNB1;EREG;ESR1;FN1;FOSL2;FTH1;GAS6;NUPR1;GSTP1;IGF1;JUN;LIF;MIF;MYC;DDR2;PRDX1;PAWR;MED31;PDGFRA;BRK1;CD248;S100A6;SFRP1;SOD2;WNT2;MED25;CAV1;SPHK1;CD74	6.75571	1.97e-15
GOBP_MAINTENANCE_OF_PROTEIN_LOCATION	KDELR1;KDELR2;PARK7;IGSF11;FBN1;FLNA;SYNE1;SUN1;ARL2BP;NR5A1;ANK3;GSN;HNRNPU;HSPA5;IL10;INSIG1;CHCHD10;ARL2;LTBP1;NBL1;NFKBIA;VPS13C;SRGN;CCDC88A;TWF1;SKP1;SORL1;SRI;TSPO;TMSB4X;TXN;CAV1;TMSB10	7.33814	2.01e-15
GOBP_EPITHELIAL_TO_MESENCHYMAL_TRANSITION	PDCD6;SPRY1;DDX17;PDPN;FERMT2;VASN;LRG1;COL1A1;CTNNB1;DAB2;DDX5;JAG1;EDN1;EDNRA;EFNA1;ENG;FLNA;PDCD4;CRB2;RGCC;HIF1A;HNRNPAB;IGF1;RBPJ;IL1B;LIMS1;MDK;MSX1;MSX2;WNT4;RTN4;ROCK1;S100A4;SDCBP;SFRP1;SFRP2;SNAI2;SOX9;TBX3;TGFB1;TGFB1I1;TWIST1;WNT2;FUZ;AKNA;DLG5	4.84081	2.22e-15
GOBP_NEGATIVE_REGULATION_OF_CELLULAR_CATABOLIC_PROCESS	TOB1;IGF2BP2;GIPC1;HNRNPA0;PARK7;CIRBP;CST3;EIF4E;EIF4G2;RYBP;FUS;SVIP;GATA4;NUPR1;PABPC1;CHMP4A;NOP53;ANXA2;HNRNPAB;HNRNPC;HNRNPU;HP;HSP90AB1;APOC1;IL10;IL10RA;LEP;LEPR;MCL1;MET;YBX1;UBXN1;CTSA;RBM38;TENT5A;BCL2;ROCK1;RPL5;RPL11;RPS7;SDCBP;SLC11A1;SORL1;STAT3;TSPO;TIMP1;TIMP2;TIMP3;ZFP36;SLC7A5;SLIRP;CAMLG;MFSD2A;YBX3;EIF3H;DAPL1;RPL23	3.93391	2.37e-15
GOBP_REGULATION_OF_METAL_ION_TRANSPORT	MRLN;AKAP9;LILRB2;AHCYL1;CORO1A;ADCYAP1R1;CLIC2;OSR1;CTNNB1;ADRA2A;EFHB;CYBA;CNKSR3;GRAMD2A;PTK2B;LRRC55;FKBP1A;FLNA;NIPSNAP2;GEM;GNAI2;GNB2;ANK3;RANGRF;HES1;ITGB1;KCNE1;KIF5B;RHOA;LGALS3;C4orf3;ARRB2;ATP1A1;ATP1B1;ATP1B3;FXYD2;ATP2B1;PDE4B;SARAF;PER1;PKP2;FXYD1;FXYD3;PLP1;FXYD5;B2M;PTGS2;BCL2;RGS4;RRAD;CCL2;CCL3;CCL4;CCL5;CXCL12;SRI;STC1;TMBIM6;TSPO;THY1;SUMO1;UTRN;VDAC1;YWHAE;YWHAH;SLC30A1;CXCR…	3.04632	2.93e-15
GOBP_ANATOMICAL_STRUCTURE_HOMEOSTASIS	CORO1A;COL3A1;DRAM2;COMP;CLDN3;CSF1R;CCN2;CTNNB1;CTSH;CTSK;CXADR;NXNL2;LCA5;ALDH1A1;PTK2B;ABCA4;GATA2;GJA1;CRB2;HIF1A;HSPB1;IGHA1;IGHA2;IGKC;IHH;ITGB1;LIPA;LTF;LYZ;MBP;MUC6;ATP2A2;ATP2B1;PRDX1;F11R;PDK4;PIGR;IL20RA;MUC13;B2M;PTGS2;BCL2;ACTB;RP1;SLC39A8;SLC1A1;SLC2A1;SLC22A5;SOD1;SOX9;SPP1;TFF3;TFRC;TJP1;ACTG1;TNFAIP3;VCL;VEGFA;CALB2;LPCAT1;MFSD2A;CAV1;PROM1;CLDN1;TJP2;HOMER2;HOMER1;BAG3	3.38821	2.98e-15
GOBP_CANONICAL_WNT_SIGNALING_PATHWAY	CDH2;RUVBL2;CTHRC1;COL1A1;CTNNB1;CTNND1;DAB2;DDX3X;TLE5;DLX5;EDN1;EDNRA;EDNRB;EGR1;DKK1;FOXO1;FOXO3;FOLR1;CBY1;GPC3;RBMS3;APOE;IGFBP1;IGFBP2;IGFBP4;IGFBP6;RBPJ;ILK;JUP;MDK;CCDC88C;NFKB1;NR4A2;PFDN5;WNT4;PPP1CA;USP47;LGR4;VPS35;RPS12;SFRP1;SFRP2;SFRP4;SOX17;SNAI2;SOX4;SOX9;SOX10;STK4;TGFB1;UBE2B;WNT2;TTC21B;WLS;BICC1;FUZ;LGR5;CAV1;RUVBL1;PLPP3;SEMA5A;KLF4;SLC9A3R1;ZEB2;RBX1	3.50138	3.2e-15
GOBP_REGULATION_OF_MONONUCLEAR_CELL_MIGRATION	CXCL13;CORO1A;CSF1R;DUSP1;ECM1;AIF1;PTK2B;PLCB1;GAS6;ABL2;PYCARD;HMGB1;APOD;RHOA;LGALS3;MDK;MSN;NBL1;NEDD9;SERPINE1;LGMN;S100A14;SELENOK;RARRES2;CCL2;CCL3;CCL4;CCL5;CCL20;CCL21;CXCL12;SPI1;THBS1;TNF;C3AR1;C5AR1;CALR;CD47	5.94026	3.26e-15
GOBP_RHYTHMIC_PROCESS	NAMPT;RACK1;KDM5B;CAVIN3;CLDN4;CREM;CYP1B1;DDX5;AHCY;EGR1;AHR;EGR3;A2M;EREG;ESR1;FOXO3;NR5A1;ANXA1;HNRNPU;HSPA5;ID1;ID2;ID3;ID4;JUND;LEP;ARRB2;MDK;MMP2;ZFHX3;NFIL3;NFKB2;PAM;PDGFRA;SERPINF1;PER1;PGR;PPP1CA;PPP1CB;LGR4;AXL;MAPK10;MAP2K6;PTGDS;PTN;PTX3;PLEKHA1;RBM4;RORB;SFPQ;BMPR1B;SLIT3;KLF9;HNF1B;KLF10;TNF;TNFAIP6;TOP1;TWIST1;BHLHE41;CIPC;BHLHE40;HOMER1;ADAMTS1	3.53343	3.6e-15
GOBP_I_KAPPAB_KINASE_NF_KAPPAB_SIGNALING	TANK;TNIP1;LAMTOR5;PRDX4;AKAP13;CARD16;CTNNB1;ECM1;EDN1;EDNRA;EDNRB;EEF1D;ESR1;FKBP1A;FLNA;GAPDH;GJA1;PYCARD;GSTP1;HLA-DRB1;BIRC3;HSPB1;IL1A;IL1B;IRAK1;IRAK2;RHOA;RHOC;LGALS1;LTF;NFKBIA;C18orf32;PER1;FAIM;PELI1;REL;ROCK1;S100A4;S100A12;S100A13;CCL21;CLEC7A;BST2;TFRC;TLR2;TSPAN6;TNF;TNFAIP3;TNFRSF1A;UBE2V1;WLS;TMEM101;TNFSF10;TNFRSF10B;CFLAR;SQSTM1;DDX21;MTDH;VAPA;CD36;LITAF;CD74	3.61869	3.81e-15
GOBP_REGULATION_OF_SIGNAL_TRANSDUCTION_BY_P53_CLASS_MEDIATOR	HEXIM1;PLK3;DDX5;EIF5A;NOP53;HIC1;HNRNPK;MDM2;MIF;MLF1;MSX1;MUC1;MYC;NPM1;RRM2B;PMAIP1;MAP2K6;BCL2;RPL5;RPL11;RPL26;RPL37;RPS7;RPS15;RPS20;SGK1;SNAI2;SOX4;TWIST1;UBB;PTTG1IP;RPL23;EEF1E1;CD44;CD74	6.56237	3.87e-15
GOBP_REGULATION_OF_PROTEIN_MODIFICATION_BY_SMALL_PROTEIN_CONJUGATION_OR_REMOVAL	TANK;PDCD6;STUB1;TNIP1;IVNS1ABP;PARK7;GABARAP;CTNNB1;COPS9;DAXX;DDX3X;EGR1;CENPX;FKBP1A;HSPBP1;GCLC;UBE2S;GPS2;NOP53;HIF1A;BIRC3;DNAJA1;HSPA1A;HSPA1B;HSPA5;HSP90AA1;HSP90AB1;ARRB2;NPM1;UBXN1;TRIM44;PPIA;PELI1;RPL5;RPL11;RPL37;RPS2;RPS3;RPS7;RPS15;RPS20;SKP1;SOX4;TSPO;TNFAIP3;UBB;UBE2V1;PTTG1IP;LAPTM5;CAMLG;RASSF5;CAV1;SPHK1;SQSTM1;RPL23;HERPUD1;RBX1	3.87195	4.15e-15
GOBP_REGULATION_OF_REPRODUCTIVE_PROCESS	CITED2;CIB1;PRDX4;ANAPC16;CTNNB1;CFAP206;DEFB1;JAG1;DUSP1;EDNRB;ESR1;MAPK15;SULF1;PLCB1;CDC26;NR5A1;NUPR1;B4GALT1;GJA1;ANAPC4;IGF1;RBPJ;IL1A;INSR;AR;ARHGDIB;LIF;MSX1;MSX2;OVGP1;PAEP;ANAPC5;ANAPC11;SERPINF1;PLAT;WNT4;PTGDS;KIF9;SFRP1;BNC1;SOD1;SOX9;STK4;TIMP1;UBE2B;VEGFA;WDR77;CFAP69;CALR;YBX3;TRIP13	4.27688	4.29e-15
GOBP_B_CELL_RECEPTOR_SIGNALING_PATHWAY	IGHV1-69D;IGHV6-1;IGHV5-51;IGHV4-61;IGHV4-59;IGHV4-39;IGHV4-34;IGHV4-4;IGHV3-74;IGHV3-53;IGHV3-49;IGHV3-48;IGHV3-33;IGHV3-30;IGHV3-23;IGHV3-21;IGHV3-20;IGHV3-15;IGHV3-13;IGHV3-11;IGHV3-7;IGHV2-5;IGHV1-18;IGHV1-3;GPS2;IGHA1;IGHA2;IGHG1;IGHG2;IGHG4;IGHM;IGKC;MNDA;PTPRC;PLEKHA1;BCL2;LPXN;CD81	5.87046	4.4e-15
GOBP_REGULATION_OF_TRANSMEMBRANE_TRANSPORT	MRLN;COX17;PPIF;AKAP9;ARL6IP5;SORBS1;AHCYL1;CORO1A;PARK7;PHB2;ADCYAP1R1;CLIC1;CLIC2;SLC43A2;OSR1;TMEM37;ADRA2A;CTSS;CYBA;CYBB;CNKSR3;DAPK1;EDN1;EDNRA;FABP5;ACSL1;PTK2B;LRRC55;FKBP1A;FLNA;ARL6IP1;ARC;CLIC4;NIPSNAP2;GEM;GPC3;GNB2;ANK3;RANGRF;IGF1;IL1B;INSR;ITGB1;KCNE1;LEP;C4orf3;NDUFA4;NFE2L2;ATP1B1;ATP1B3;FXYD2;OAZ1;SHANK1;PDE4B;AZIN1;ACSL5;PIM1;PIK3R1;FXYD1;FXYD3;PLP1;FXYD5;ITLN1;SELENOS;RELN;BCL…	2.59663	4.75e-15
GOBP_REGULATION_OF_HORMONE_LEVELS	STUB1;CPQ;KDM5B;CHGA;PARK7;SLC16A10;ADH1B;ADM;CPE;CRABP2;SELENOM;ADRA2A;CTSB;CTSK;CTSL;CTSZ;CYP1B1;DAB2;DIO2;DPP4;EDN1;EDNRB;EGR1;ESR1;ALDH1A1;ACSL4;ALDH1A3;FOXO1;NR5A1;BACE2;MPC2;TIPARP;GJA1;SERP1;GLUL;ANXA1;HIF1A;HLA-DRB1;ICA1;IL1B;IL1RN;LEP;LIF;PIM3;MME;ATP1A1;NFKB1;OSM;PDGFRA;PFKL;WNT4;POR;CCDC186;BCHE;PLEKHA1;SCPEP1;RBM4;RBP1;RFX3;CCL5;SFRP1;SCG5;NIBAN2;SLC16A1;SOX4;SPP1;SRI;TBX3;HNF1B;TSPO;…	2.77227	5.05e-15
GOBP_POSITIVE_REGULATION_OF_CYTOSKELETON_ORGANIZATION	ARPC2;AKAP9;WASF2;CDC42EP3;FERMT2;DSTN;SYNPO;CCN2;EDN1;CTTN;PTK2B;PPP1R35;MAPK15;GRB2;RGCC;PYCARD;GSN;HCK;HCLS1;HSPA1A;HSPA1B;ID1;RHOA;RHOC;ARL2;MAP1B;MET;PFN1;PFN2;PLEK;WNT4;CCDC88A;BRK1;SLAIN2;RAC1;RPS3;S100A10;CCL21;SDC4;SFRP1;TPM1;VASP;WAS;NRP1;SEMA5A;MYLK3;CD47;PDE4DIP;CDC42	4.41698	5.22e-15
GOBP_SPERM_MOTILITY	CFAP54;CFAP52;CFAP206;TTLL9;DEFB1;DNAH5;CFAP221;ENKUR;CFAP65;CATSPERD;CFAP45;DPCD;GAS8;DNAI1;TEKT2;TSSK4;CFAP157;CFAP47;IFT81;DNAJA1;CCDC39;PLTP;LZTFL1;CCDC40;MNS1;CFAP44;KIF9;SORD;TMF1;UBE2B;SPAG16;CFAP69;SPEF2;CFAP43;SLIRP;ROPN1L;DNAH11;TPGS1;SPAG6	5.62919	5.75e-15
GOBP_REGULATION_OF_WOUND_HEALING	FERMT2;CLDN4;CLDN3;ADRA2A;EDN1;F3;ENPP4;ALOX12;ANXA1;ANXA2;APOE;ITGB1;NFE2L2;DDR2;SERPINE1;SERPINB2;TNFRSF12A;PDGFRA;PLAT;PLAUR;WNT4;ACTA2;CLEC7A;PRDX2;TFPI;THBD;THBS1;ACTG1;SERPING1;TSPAN8;TNF;TNFAIP3;XBP1;CXCR4;VKORC1;EMILIN2;CAV1;CLDN1;CD9;CD36	5.41753	7.19e-15
GOBP_BEHAVIOR	ACTR2;LILRB2;CEBPB;ARL6IP5;PARK7;C12orf57;CSTB;ADRB3;DNAAF4;DPP4;RCAN1;AGTR2;AHCY;EDNRB;EGR1;EIF4E;EPS8;ALDH1A3;DKK1;PLCB1;ARC;FOS;NEGR1;ADGRF1;ABL2;PCDH17;GLS;NPW;HIF1A;HMGCR;ID2;APOE;APRT;IDO1;INSR;ITGA3;ITGA5;ITGB1;ARF4;LDLR;LEP;LEPR;ARRB2;MDK;MEIS2;MME;ASIP;ASL;ZFHX3;NEDD9;NPHP1;NR4A2;SHANK1;PCM1;PAIP2;SERPINF1;AHI1;OXR1;STRBP;PPT1;VPS35;LGMN;RELN;B2M;PTGDS;PTGS2;PTN;BCHE;BCL2;ATXN1;CCL3;CXCL…	2.56283	7.23e-15
GOBP_CELLULAR_PROCESS_INVOLVED_IN_REPRODUCTION_IN_MULTICELLULAR_ORGANISM	CIB1;PRDX4;PACRG;CFAP54;CTNNB1;CXADR;CFAP206;DEFB1;EDN1;EDNRA;SPAG17;CFAP221;EREG;PTK2B;FOXO3;TUT4;FOLR1;CFAP65;CATSPERD;ANG;TSSK4;CFAP157;CFAP47;IFT81;SLC2A8;HMGB2;IGF1;IHH;ITGB1;ARRB2;SMAD5;MDK;NPHP1;PAEP;SERPINA5;HOOK1;WNT4;MNS1;STRBP;CFAP44;PTCH1;PTGDS;PTN;PTX3;NECTIN2;BCL2;RFX2;RPS6;PRDM1;SFRP1;BNC1;BMPR1B;SLIT3;STAU1;TMF1;TNFAIP6;UBB;UBE2B;ZBTB16;WDR77;SPAG16;CFAP69;SPEF2;TTC26;CFAP43;SLIRP…	2.98488	7.47e-15
GOBP_REGULATION_OF_SMALL_MOLECULE_METABOLIC_PROCESS	FAM3C;SORBS1;SLC2A6;PARK7;ADCYAP1R1;ADM;DAB2;EGR1;ENO1;FABP5;PTK2B;FOXO1;ZBTB20;NUPR1;GPD1;H19;PGP;ANXA1;HIF1A;APOC1;IGF1;APOE;IGFBP3;IGFBP4;IL1B;INSIG1;INSR;LDLR;LEP;LEPR;ARL2;MST1;MT-CO2;NDUFC2;NFKB1;NNMT;FIS1;PDK4;PLEK;PMAIP1;WNT4;POR;DDIT4;SELENOS;SDHAF3;PPP4R3B;PTGS2;RANBP2;SNAI2;SOD1;SOX9;STAR;STAT3;TFF3;TSPO;TMSB4X;TNF;TWIST1;NR4A3;MFSD2A;CAV1;AKR1C3;IRS2;MBTPS1;MIDN;SLC7A7;ATP5IF1;CD74	3.3127	7.52e-15
GOBP_MUSCLE_ORGAN_DEVELOPMENT	CITED2;BASP1;DDX17;VAMP5;COL3A1;COL6A3;COL11A1;MTPN;MYL6B;CRYAB;CTNNB1;TCF23;DDX5;DES;RCAN1;DSP;EDNRA;EGR1;EGR3;ELN;ENG;ERBB3;FKBP1A;FLNB;FOS;MAFF;NUPR1;SERP1;EFEMP2;NR4A1;ID3;IGF1;RBPJ;ITGB1;RHOA;LAMA5;LIF;LRP2;MSX1;ZFHX3;MYL6;ATF3;PKP2;COPRS;GPCPD1;HEG1;BCL2;NIBAN2;SMTN;SRI;TAGLN;KLF5;TCF12;NR2F2;TGFB1;TPM1;TWIST1;UTRN;WNT2;XBP1;BTG2;FXR1;ARID5B;YBX3;CAV1;CD164;CFLAR;SGCE;HOMER1	3.27728	7.54e-15
GOBP_PROTEIN_KINASE_B_SIGNALING	PDCD6;RACK1;CIB1;FERMT2;CHI3L1;CAVIN3;PARK7;PLK3;EPHA2;ENG;F3;STOX1;GAS6;GATA4;H19;NOP53;HCLS1;HSP90AA1;HSP90AB1;IGF1;IGFBP5;IL1B;IL18;ILK;INSR;ITGB1;LEP;LRP2;ARRB2;MAZ;MET;OSM;AXL;MYDGF;RTN4;PLEKHA1;RRAS;CCL2;CCL3;CCL5;CCL21;SOX9;ZFP36L1;TGFB1;THBS1;TNF;TXN;AKR1C3;SEMA5A;MTDH;SLC9A3R1;GDF15	4.12487	7.81e-15
GOBP_TUMOR_NECROSIS_FACTOR_SUPERFAMILY_CYTOKINE_PRODUCTION	SPON2;GPNMB;IRAK3;PARK7;CLU;CYBA;CYBB;DDT;LY96;ZBTB20;GAS6;PYCARD;GSTP1;HLA-E;HMGB1;HSPB1;IFNGR1;IGF1;IL1A;IL10;ARG2;LEP;LPL;LTF;ARRB2;MIF;PIK3R1;ERRFI1;AXL;SELENOS;PTPRC;SELENOK;CCL3;VSIR;CLEC7A;STAT3;THBS1;TSPO;TLR2;TNFAIP3;TWIST1;TYROBP;ZFP36;ARHGEF2;CD14;CD36;AKAP12;CD47	4.44768	7.89e-15
GOBP_EXTRINSIC_APOPTOTIC_SIGNALING_PATHWAY_VIA_DEATH_DOMAIN_RECEPTORS	PARK7;GABARAP;DAPK1;DAXX;DDX3X;BEX3;HMGB2;ICAM1;LGALS3;ATF3;SERPINE1;PIK3R1;PMAIP1;FAIM;BCL2;BID;SFRP1;SFRP2;SKIL;BMPR1B;SPI1;STK4;THBS1;TIMP3;TNF;TNFAIP3;TNFRSF1A;TNFRSF10B;CFLAR;ARHGEF2;BAG3	7.52771	8.27e-15
GOBP_STRESS_ACTIVATED_PROTEIN_KINASE_SIGNALING_CASCADE	HIPK3;TRIB1;ARL6IP5;GADD45G;CRYAB;CCN2;DAXX;GADD45A;DUSP1;MECOM;PTK2B;FOXO1;PLCB1;PDCD4;GPS2;PYCARD;GSTP1;HMGB1;PRMT1;DNAJA1;IGFBP6;IL1A;IL1B;IRAK1;RHOA;LEP;MAP3K5;CCDC88C;MYC;GADD45B;NFKB1;PRDX1;TAOK3;MAP3K20;PER1;PPIA;ULK4;MAPK10;MAP2K1;MAP2K2;MAP2K3;MAP2K6;CCL21;SDCBP;SFRP1;SFRP2;SPI1;ZFP36L1;TNF;TPD52L1;VEGFA;EZR;ZFP36;SPHK1;HAND2;PAGE4	3.84262	9.32e-15
GOBP_REGULATION_OF_CELL_CYCLE_PROCESS	PDCD6IP;CDKN1A;CDK2AP2;GPNMB;SMC2;CETN2;GIPC1;PHB2;PLK3;CCN2;CTNNB1;NEK10;DDX3X;DUSP1;EDN1;AIF1;EREG;STOX1;PPP1R35;MAPK15;PLCB1;CDC26;SYF2;KANK2;CHORDC1;CHMP2A;RGCC;CHMP4A;GPR132;ANAPC4;NOP53;ANXA1;HNRNPU;APEX1;HSPA1A;HSPA1B;ID2;DCDC1;IGF1;IK;IL1A;IL1B;INSR;RHOA;LIF;MDM2;MLF1;MN1;MSX1;MSX2;MUC1;MYC;NPM1;DDR2;RRM2B;PBX1;RPS27L;SH3GLB1;TAOK3;ANAPC5;CHMP5;ANAPC11;MAP3K20;PLSCR1;WNT4;AURKAIP1;USP47;P…	2.41727	9.44e-15
GOBP_POSITIVE_REGULATION_OF_ESTABLISHMENT_OF_PROTEIN_LOCALIZATION	RACK1;CIB1;SLC51B;PLK3;ACSL3;ACSL4;FLNA;CD2AP;MPC2;GAS6;SERP1;GLUL;SFN;ANG;ANK3;HCLS1;HIF1A;HLA-DRB1;HSP90AA1;HSP90AB1;IGF1;IL1A;IL1B;ITGAM;ITGB2;JUP;LEP;MYH10;OAZ1;FIS1;PCM1;SH3GLB1;ERGIC3;PIK3R1;TOMM7;LEPROT;PPIA;PPID;VPS35;PTGS2;RHOU;RAC2;RAN;UBL5;SORL1;SOX4;SRI;TCP1;TGFB1;TLR2;TNF;TRH;CCT3;UBE2D3;EZR;YWHAE;WLS;CEP290;IRS2;CCT6A;PDCD5;BAG3;CD81;CDH1	3.44638	9.57e-15
GOBP_NEURAL_TUBE_DEVELOPMENT	CITED2;SEMA3C;SPINT2;TMED2;CTHRC1;ADM;EPHA2;DZIP1L;CLUAP1;COBL;RPGRIP1L;FOLR1;PLXNB2;CBY1;IFT172;PHGDH;INTU;HIF1A;HES1;LRP2;MARCKS;PFN1;IFT57;PTCH1;CC2D2A;SHROOM3;BRD2;RPS7;SDC4;SFRP1;SFRP2;SOX17;PHACTR4;SOX4;SPINT1;ZFP36L1;STK4;TGFB1;TWIST1;VASP;TCTN1;FUZ;TMEM107;ALDH1A2	4.82071	9.91e-15
GOBP_REGULATION_OF_EPITHELIAL_CELL_DIFFERENTIATION	CD24;SPRY1;CEBPB;OSR1;CTNNB1;JAG1;FOXJ1;PLCB1;MAFF;SFN;HES1;ID1;IL1A;IL1B;AQP3;LIF;MSX2;NME2;SERPINE1;F11R;ERRFI1;AHI1;PRKX;PRLR;PTCH1;PLAAT4;CCND1;RFX3;ROCK1;SFRP4;SOX9;ZFP36L1;TBX3;ZEB1;BTG1;TNF;TNFRSF1A;TP73;VCL;VEGFA;ZFP36;PAX8;CAV1;PROM1	4.82071	9.91e-15
GOBP_PROTEIN_CONTAINING_COMPLEX_LOCALIZATION	AKAP9;IFT27;IFT43;AP2M1;LCA5L;LCA5;SPAG17;CLUAP1;ARC;TRAF3IP1;IFT172;INTU;IFT81;HNRNPU;KIF5B;LMNA;ARL3;NPM1;PCM1;DYNC2LI1;HSPB11;IFT57;VPS35;RELN;IFT46;IFT80;RAN;RAP1A;RPGR;RPS15;SFPQ;IFT22;SLC1A1;STAU1;TNFAIP2;TYROBP;EZR;DYNC2H1;TTC21B;TTC26;IFT74;FUZ;IFT88;NUMB;DYNLL1;RAB11A	4.58335	1.14e-14
GOBP_TRANSFORMING_GROWTH_FACTOR_BETA_RECEPTOR_SIGNALING_PATHWAY	SPRY1;STUB1;CDKN1C;CITED2;GIPC1;FERMT2;VASN;LRG1;COL1A2;COL3A1;DAB2;ENG;FBN1;FKBP1A;FOLR1;FOS;FAM89B;HSPA1A;HSPA5;HSP90AB1;ID1;ITGA3;ITGB1;ITGB8;JUN;LTBP1;LTBP2;ARRB2;SMAD5;SMAD9;ASPN;C20orf27;HTRA1;PMEPA1;SINHCAF;RBBP4;RBBP7;SDCBP;SKIL;SPI1;STAT3;ZEB1;TGFB1;TGFB1I1;THBS1;ZYX;LTBP4;CAV1;NREP;LPXN;GDF15;ZEB2	4.07561	1.16e-14
GOBP_ACTIN_POLYMERIZATION_OR_DEPOLYMERIZATION	ARPC5;ARPC3;ARPC1B;ARPC2;CDC42EP3;CFL1;DSTN;TRIOBP;CORO1A;ADD3;PLEKHH2;MTPN;AIF1;ELN;CTTN;EPS8;PTK2B;COBL;COTL1;ANG;GRB2;PYCARD;GSN;HCK;HCLS1;CATIP;RHOA;LIMA1;PFN1;PFN2;PLEK;ENAH;BRK1;MICAL3;TWF1;RAC1;CCL21;CXCL12;SPTBN1;SPTBN2;TMSB4X;VASP;WAS;CAPZA2;SEMA5A;PSTPIP2;MYADM;TMSB10;ARHGAP18	4.29883	1.23e-14
GOBP_EPITHELIAL_TUBE_FORMATION	CITED2;SPINT2;TMED2;CTHRC1;OSR1;ADM;CTNNB1;CLUAP1;COBL;FOLR1;PLXNB2;IFT172;HIF1A;LRP2;PFN1;PODXL;WNT4;IFT57;PTCH1;CC2D2A;SHROOM3;BRD2;RPS7;SDC4;SFRP1;SFRP2;PHACTR4;SOX4;SOX9;SPINT1;STK4;HNF1B;TGFB1;TWIST1;VASP;PAX8;IRX3;TCTN1;CEP290;FUZ	5.30724	1.23e-14
GOBP_REGULATION_OF_MRNA_SPLICING_VIA_SPLICEOSOME	MBNL2;SRRM1;SAP18;DDX17;CELF2;CIRBP;CLNS1A;DDX5;RBMX;TRA2A;HNRNPA1;HNRNPA2B1;HNRNPK;HNRNPU;HSPA8;MBNL1;NCL;NPM1;RBM38;RBM25;RBM3;RBM4;SRSF2;SRSF3;SRSF7;TRA2B;SON;WDR77;FXR1;SRSF9;QKI;RBM39;PRDX6;WTAP;RBM8A	6.20707	1.41e-14
GOBP_TISSUE_REMODELING	GPNMB;SEMA3C;CTHRC1;CSF1R;CST3;CTNNB1;CTSK;JAG1;AGTR2;EDNRA;EPHA2;ELF3;PTK2B;FLNA;GJA1;HIF1A;IGFBP5;RBPJ;IHH;IL1A;IL18;LEP;LEPR;LIF;LIPA;MDK;MDM2;MITF;MMP2;MMP14;NFKB1;DDR2;PDK4;IL20RA;LGR4;AXL;PTN;ROCK1;SFRP1;SPP1;TFRC;TGFB1;TIMP1;TNFAIP3;CAV1;HAND2	4.54879	1.43e-14
GOBP_RESPONSE_TO_HEAT	PDCD6;DNAJB6;STUB1;DNAJB4;HSPB6;CRYAB;DAXX;TFEC;CHORDC1;GCLC;HSBP1;DNAJA1;HSPA1A;HSPA1B;HSPA6;HSPB1;HSP90AA1;HSP90AB1;DNAJB1;IGF1;IGFBP7;IL1A;IRAK1;IER5;DNAJA4;TCIM;PTGS2;RBBP7;CXCL12;SOD1;THBS1;SUMO1;YWHAE;LRP11;CD14;BAG3	5.98047	1.45e-14
GOBP_ESTABLISHMENT_OR_MAINTENANCE_OF_CELL_POLARITY	PDCD6IP;ARPC5;ACTR2;SPRY1;RACK1;SPINT2;SDCCAG8;CTNNA1;PTK2B;FOXJ1;FRMD4B;WWC1;RPGRIP1L;FAM89B;CLIC4;GJA1;ABL2;CRB2;GSN;HES1;HSP90AA1;HSP90AB1;ILK;ITGB1;ARF4;RHOA;RHOB;RHOC;RND3;LLGL2;LMNA;MAP1B;MAP4;MSN;SHTN1;RHOU;RAC1;RAC2;RAP1B;ACTB;ROCK1;CCL4;CCL21;DST;DYNLT1;EZR;WEE1;PARD6B;MAP7;PDLIM1;DLG5;CYTH1;SLC9A3R1;CDC42	3.90728	1.55e-14
GOBP_POSITIVE_REGULATION_OF_DNA_BINDING_TRANSCRIPTION_FACTOR_ACTIVITY	CIB1;LAMTOR5;PRDX3;IRAK3;PARK7;PHB2;NLRP3;CARD16;CLU;MTPN;CTNNB1;EDN1;ESR1;ADGRF1;TSSK4;RGCC;PYCARD;HCLS1;ANXA3;HSPA1A;HSPA1B;IL1B;IL10;IL18;IRAK1;IRAK2;AR;JUP;LTF;NPM1;DDR2;PPIA;RELN;PSMA6;RPS3;S100A8;S100A9;S100A12;CLEC7A;STAT3;TFRC;TLR2;TNF;UBE2V1;VEGFA;WNT2;ARID5B;CAT;CAV1;PLPP3;CFLAR;SPHK1;BUD31;ARHGEF2;MTDH;RPS6KA5;FANK1;CD36	3.67496	1.61e-14
GOBP_RESPONSE_TO_VIRUS	TANK;IFITM3;SPON2;DDX17;LAMTOR5;NPC2;IFITM2;IVNS1ABP;CFL1;FGL2;IRAK3;PHB2;NLRP3;CLU;SLFN13;DDX3X;EEF1G;EIF5A;ENO1;FGR;SERINC5;SAMHD1;TRAF3IP1;GBP1;GBP3;H19;PYCARD;NOP53;HIF1A;BIRC3;HSPB1;HSP90AA1;IFI16;IFI27;IFNGR1;IL1B;IRF1;ISG20;ITGAX;ITGB8;ARF1;STMN1;NFKB1;PCBP2;PLSCR1;PMAIP1;POU2AF1;DDIT4;TRIM44;HTRA1;ZC3HAV1;PSMA2;PTPRC;SELENOK;ACTA2;BCL2;RNASE6;RPS15A;CCL4;CCL5;CXCL12;SEC14L1;BNIP3L;BST2;TL…	3.0073	1.68e-14
GOBP_REGULATION_OF_PHAGOCYTOSIS	RACK1;LMAN2;RAB31;CYBA;FCER1G;FCN1;FGR;GAS6;GATA2;PYCARD;HCK;HMGB1;IL1B;MFGE8;CFP;PLA2G5;PLSCR1;PTPRC;PTX3;CCL2;CLEC7A;SLC11A1;SOD1;TGM2;TLR2;TNF;C3;C4A;C4B;CALR;SNX3;SPHK1;CD36;CD47	6.3728	1.83e-14
GOBP_POSITIVE_REGULATION_OF_PROTEIN_CATABOLIC_PROCESS	TRIB1;STUB1;RACK1;GABARAP;CLU;PLK3;ADRA2A;DAB2;FOXO1;HSPBP1;RNF144B;ARIH1;RNF19A;TIPARP;NUPR1;GPC3;GCLC;MYLIP;NOP53;HSPA1A;HSPA1B;HSP90AA1;APOE;IL1B;LDLR;LRP1;LRP2;MDM2;MSN;NFE2L2;OAZ1;NDUFA13;VPS35;SOX17;SUMO2;SORL1;SOX9;ELOB;TNF;TNFAIP3;TNFRSF1B;C4BPA;SUMO1;EZR;LPCAT1;CAV1;ZFAND2A;HERPUD1;CD81;RBX1	4.1651	1.84e-14
GOBP_PROTEIN_PROCESSING	SPON1;CARD16;OMA1;COMP;CPE;CPM;CTSH;CTSL;CTSS;CTSZ;AEBP1;DPP4;ENO1;F3;SEC11A;BACE2;TMEM98;IFT172;GAS1;SPCS1;TMEM208;PYCARD;GSN;ANXA2;HP;IFI16;IHH;MME;MMP14;SERPINE1;PGK1;PLAT;PLAUR;CYCS;SRGN;PSENEN;CPXM1;LGMN;TMPRSS4;PTCH1;BCHE;S100A10;PERP;VSIR;SCG5;THBD;THBS1;C1R;IL1R2;DYNC2H1;HM13;CAPN2;CAST;MBTPS1;SEC11C;SPCS2	3.76396	1.93e-14
GOBP_REGULATION_OF_CANONICAL_WNT_SIGNALING_PATHWAY	CDH2;RUVBL2;CTHRC1;COL1A1;CTNNB1;CTNND1;DAB2;DDX3X;TLE5;DLX5;EGR1;DKK1;FOXO1;FOXO3;FOLR1;CBY1;GPC3;RBMS3;APOE;IGFBP1;IGFBP2;IGFBP4;IGFBP6;RBPJ;ILK;JUP;MDK;CCDC88C;NFKB1;PFDN5;PPP1CA;USP47;LGR4;VPS35;RPS12;SFRP1;SFRP2;SFRP4;SOX17;SNAI2;SOX4;SOX9;SOX10;STK4;TGFB1;UBE2B;TTC21B;WLS;BICC1;FUZ;LGR5;CAV1;RUVBL1;SEMA5A;SLC9A3R1;ZEB2;RBX1	3.69975	2.11e-14
GOBP_REGULATION_OF_LIPID_METABOLIC_PROCESS	STUB1;NPC2;SORBS1;PHB2;LACTB;ADM;ADRA2A;FMC1;DAB2;EGR1;FABP5;ACSL3;PTK2B;FGR;NR5A1;ZBTB20;GPS2;ORMDL2;DNAJC15;ANXA1;ID2;APOC1;APOD;APOE;IGFBP7;CCN1;IL1A;IL1B;INSIG1;LDLR;LEP;ASAH1;ATP1A1;NFKB1;GOLM1;PDGFRA;PDK4;WNT4;POR;PPP2R5A;PSAP;PTGS2;RARRES2;CCL21;SNAI2;SOD1;SORL1;SOX9;STAR;TGFB1;TSPO;TNF;C3;TWIST1;LPCAT1;NR4A3;CAPN2;MFSD2A;CAV1;PLPP1;AKR1C3;IRS2;MBTPS1;EDF1;SPHK1;CD74;CD81;CDC42	3.22872	2.14e-14
GOBP_REGULATION_OF_PROTEIN_UBIQUITINATION	PDCD6;STUB1;IVNS1ABP;PARK7;GABARAP;DAXX;DDX3X;CENPX;FKBP1A;HSPBP1;GCLC;UBE2S;GPS2;BIRC3;DNAJA1;HSPA1A;HSPA1B;HSPA5;HSP90AA1;HSP90AB1;ARRB2;NPM1;UBXN1;TRIM44;PPIA;PELI1;RPL5;RPL11;RPL37;RPS2;RPS3;RPS7;RPS15;RPS20;SKP1;SOX4;TSPO;TNFAIP3;UBB;UBE2V1;PTTG1IP;LAPTM5;CAMLG;RASSF5;CAV1;SPHK1;SQSTM1;RPL23;HERPUD1;RBX1	4.13882	2.25e-14
GOBP_GERM_CELL_DEVELOPMENT	CIB1;PACRG;CFAP54;CTNNB1;CFAP206;DEFB1;EDN1;EDNRA;SPAG17;CFAP221;EREG;PTK2B;FOXO3;TUT4;CFAP65;CATSPERD;ANG;TSSK4;CFAP157;CFAP47;IFT81;HMGB2;IGF1;IHH;SMAD5;MDK;PAEP;HOOK1;WNT4;MNS1;STRBP;CFAP44;PTCH1;PTN;PTX3;NECTIN2;BCL2;RFX2;RPS6;PRDM1;BNC1;BMPR1B;STAU1;TMF1;TNFAIP6;UBE2B;ZBTB16;WDR77;SPAG16;CFAP69;SPEF2;TTC26;CFAP43;SLIRP;NME5;ROPN1L;LGR5;RSPH1;RNF8;TPGS1;TRIP13;QKI;SPAG6;REC8	3.3635	2.46e-14
GOBP_SUBSTRATE_ADHESION_DEPENDENT_CELL_SPREADING	ARPC2;CIB1;PDPN;FERMT2;TRIOBP;DAB2;EFNA1;FBLN1;FLNA;FN1;GBP1;ILK;RHOA;LAMA5;LAMB1;LAMB3;LIMS1;TACSTD2;MDK;NEDD9;P4HB;PIK3R1;PKP2;AXL;RAC1;NTN4;S100A10;DOCK5;ACTN4;CALR;ANTXR1;NRP1;MYADM;LPXN;CDC42	6.04429	2.62e-14
GOBP_STRESS_FIBER_ASSEMBLY	WASF2;SORBS1;FERMT2;CCN2;ELN;PTK2B;PHACTR1;RGCC;ITGB1;RHOA;RHOC;STMN1;TACSTD2;MET;F11R;PFN1;PFN2;PIK3R1;WNT4;CCDC88A;RAC1;ROCK1;S100A10;SDC4;SFRP1;TJP1;ACTG1;TPM1;WAS;ZYX;RHPN2;NRP1;PDLIM1;CD47;CDC42	6.04429	2.62e-14
GOBP_METAL_ION_TRANSPORT	MRLN;COX17;AKAP9;RAMP1;LILRB2;SLC34A2;AHCYL1;MAGED2;CORO1A;ADCYAP1R1;CLIC2;OSR1;CP;TMEM37;CCN2;CTNNB1;ADRA2A;EFHB;CYBA;CNKSR3;EDN1;EDNRA;EDNRB;GRAMD2A;PTK2B;LRRC55;FKBP1A;FLNA;COMMD3;FTH1;FTL;GAS6;NIPSNAP2;GEM;GJA5;GNAI2;GNB2;ANK3;RANGRF;SEC61A1;SLC40A1;ANXA2;HES1;ITGB1;KCNE1;KCNN3;KIF5B;RHOA;LCN2;LGALS3;C4orf3;LRP2;LTF;ARRB2;ATOX1;ATP1A1;ATP1B1;ATP1B3;FXYD2;ATP2A2;ATP2B1;SLC25A37;PDE4B;SARAF;PER…	2.22361	2.64e-14
GOBP_SENSORY_SYSTEM_DEVELOPMENT	SPRY1;CITED2;KDM5B;PLAAT3;C12orf57;OSR2;COL4A1;COL5A1;COL5A2;COL8A1;CRYBG3;CRYAB;CTNNB1;CYP1B1;JAG1;EPHA2;HIPK1;ALDH1A3;FBN1;EFEMP1;RPGRIP1L;TSPAN12;CLIC4;IFT172;B9D1;CRB2;HIF1A;HMGN1;HES1;IHH;ITGAM;JUN;MAF;MEIS2;MITF;NPHP1;ATP2B1;PBX1;PDGFRA;SERPINF1;PFDN5;AHI1;CC2D2A;RCN1;BCL2;RORB;RP1;RPL24;PRDM1;SKIL;SLC1A1;BMPR1B;PHACTR4;SOX9;STAT3;ZEB1;THY1;C3;TWIST1;VEGFA;VIM;WNT2;PXDN;TMEM231;LPCAT1;CEP29…	3.01729	3.15e-14
GOBP_ORGANIC_ACID_TRANSPORT	ARL6IP5;PDPN;GIPC1;RBP7;SLC16A10;SLC15A4;PLIN2;SLC25A29;SLC51B;SLC43A2;EMB;CRABP2;SLC26A2;EDN1;FABP5;FABP6;ACSL1;ACSL3;ARL6IP1;FOLR1;SERINC5;MPC2;GJA1;ANXA1;APOE;IL1A;IL1B;AQP9;ITGB1;LEP;LLGL2;LRP2;MIF;FIS1;ACSL5;PLA2G2A;PLA2G5;PMP2;SLC38A2;SLC47A1;MAP2K6;RBP1;RGS2;RGS4;SLC1A1;SLC1A7;SLC2A1;SLC3A1;SLC3A2;SLC6A6;SLC7A2;SLC11A1;SLC16A1;THBS1;TNF;TRH;SLC7A5;MFSD2A;KMO;IRS2;ABCC3;SLC7A7;SLC9A3R1;CD36…	3.29816	3.38e-14
GOBP_POSITIVE_REGULATION_OF_CELLULAR_AMIDE_METABOLIC_PROCESS	TOB1;CIRBP;CLU;CYP1B1;DDX3X;EEF2;EFNA1;EIF5A;PTK2B;PPP1R15A;PLXNB2;PABPC1;SERP1;COA3;HNRNPU;IFNGR1;CCN1;EIF3E;RHOA;KRT17;NFE2L2;NPM1;YBX1;RPS27L;NGRN;PKM;POLR2G;RBM3;RBM4;RPL5;RPL26;RPS4X;RPS9;CCL5;UPF3A;SOX4;THBS1;TNF;VIM;CNBP;FXR1;YBX3;EIF3D;EIF4A3	4.59051	4.03e-14
GOBP_SENSORY_ORGAN_MORPHOGENESIS	CITED2;TRIOBP;C12orf57;CTHRC1;OSR2;COL5A1;COL5A2;COL8A1;COL11A1;OSR1;CTNNB1;DLX5;JAG1;EDN1;EDNRA;EPHA2;HIPK1;STOX1;ALDH1A3;FBN1;EFEMP1;RPGRIP1L;TSPAN12;IFT172;GATA2;INTU;CRB2;HIF1A;HMGN1;IHH;INSIG1;MSX1;MYO6;PRRX1;AHI1;BCL2;RORB;RP1;RPL38;PRDM1;SLC1A1;PHACTR4;SOD1;SOX9;STAT3;TBX3;ZEB1;THY1;TWIST1;VEGFA;WNT2;PAX8;CEP290;SLC44A4;MFSD2A;PROM1;IGFN1;SLC9A3R1	3.57141	4.48e-14
GOBP_CARBOHYDRATE_METABOLIC_PROCESS	TSTD1;AKR1A1;ST3GAL6;FAM3C;SORBS1;PTGES3;CHI3L1;CHIT1;SLC2A6;OMA1;ADCYAP1R1;ADRB3;ENO1;ALDH2;FABP5;PTK2B;FOXO1;GABARAPL1;FUCA1;PGLS;GALNT3;GAPDH;ZBTB20;NUPR1;B4GALT1;GK;GLA;SERP1;GCLC;GPD1;PGP;SLC2A8;HAS1;HIF1A;AOAH;IDH2;APOD;IGF1;IGFBP3;IGFBP4;IL6ST;IMPA2;INSR;LDHA;LEP;LEPR;ARL2;MANBA;CHST6;MDH2;MGAT2;MST1;ATF3;NEU1;NFKB1;NNMT;OVGP1;DERA;PDK4;GALNT7;PFKFB3;PFKL;PGK1;PKM;PLEK;PMAIP1;DPM3;DDIT4;PP…	2.55939	4.5e-14
GOBP_CELLULAR_RESPONSE_TO_DNA_DAMAGE_STIMULUS	TANK;ACTR2;CDKN1A;STUB1;CIB1;CETN2;RUVBL2;MORF4L1;PARK7;CLU;PLK3;SPATA18;CRIP1;MCMDC2;GADD45A;DDX5;EPHA2;CENPX;ENDOG;HIPK1;EYA2;MAPK15;ZBTB1;PDS5B;FOXO1;FOXO3;PPP1R15A;FUS;ZBTB38;XRCC6;SAMHD1;SYF2;NUPR1;SFN;PAXX;GRB2;PYCARD;NOP53;HIC1;HMGB1;HMGB2;HMGN1;HNRNPK;APEX1;IFI16;KIF22;GTF2H5;MCL1;MDM2;MGMT;MIF;MNDA;MPG;MSX1;MUC1;MYC;MYO6;NPM1;RRM2B;RPS27L;TAOK3;MAP3K20;PIK3R1;PMAIP1;POLR2I;DDIT4;USP47;PP…	2.23422	4.71e-14
GOBP_MAMMARY_GLAND_DEVELOPMENT	CEBPB;KDM5B;PHB2;CSF1R;EPHA2;ELF3;ESR1;HIF1A;ID2;IGFBP5;APRT;IRF6;AR;AREG;MGMT;MSX1;MSX2;MT-CO2;NFKB1;NME1;PAM;PGR;WNT4;PRLR;RTN4;PTCH1;CCND1;RPLP0;SOX9;TBX3;VEGFA;WNT2;XBP1;DDR1;LBH;CAV1;IRS2;SOCS2;ATP2C2	5.17347	5.05e-14
GOBP_POSITIVE_REGULATION_OF_CELL_PROJECTION_ORGANIZATION	ACTR2;ARPC2;WASF2;CDC42EP3;EHD1;CRABP2;CUX1;DPYSL3;EPS8;PTK2B;PPP1R35;FLNA;COBL;FN1;MACF1;PLXNB2;NEGR1;ABL2;GOLGA4;RAPGEF1;GRN;HSPA5;HSP90AA1;APOE;ITGA6;ITGA3;CAPRIN1;MAP1B;MDK;NEDD9;NFE2L2;ZMYND10;ENPP2;SERPINF1;PFN1;PIK3R1;PLXNB1;PLXNB3;FNBP1L;MNS1;CCDC88A;BRK1;MAP2K1;MAP2K2;RELN;TWF1;PTN;SHTN1;RAC1;RAC2;RAP1A;RGS2;RP1;S100A9;CCL21;CXCL12;SKIL;VEGFA;METRN;FUZ;IFT88;SNX3;NRP1;CFLAR;SEMA5A;CCP110…	3.16004	5.11e-14
GOBP_PROTEIN_POLYMERIZATION	ARPC5;ARPC3;ARPC1B;ARPC2;AKAP9;CDC42EP3;TUBGCP2;TRIOBP;CORO1A;ADD3;MTPN;AIF1;ELN;CTTN;EPS8;PTK2B;MAPRE3;COBL;COTL1;CHMP2A;UBE2S;ANG;GPX4;GRB2;CHMP4A;RANGRF;PYCARD;GSN;HCK;HCLS1;HSPA1A;HSPA1B;HSP90AA1;CATIP;RHOA;STMN1;ARL2;MAP1B;MET;TPPP3;PFN1;PFN2;TWF1;SLAIN2;RAC1;RPS3;CCL21;SPTBN1;SPTBN2;TMSB4X;VASP;VDAC2;WAS;CAPZA2;PSTPIP2;MYADM;TMSB10;ARHGAP18;PDE4DIP	3.50252	5.56e-14
GOBP_ANTIGEN_PROCESSING_AND_PRESENTATION_OF_PEPTIDE_ANTIGEN	IFI30;CTSD;CTSL;CTSS;FCER1G;PYCARD;PDIA3;HLA-A;HLA-B;HLA-C;HLA-DMA;HLA-DMB;HLA-DPA1;HLA-DPB1;HLA-DQA1;HLA-DQA2;HLA-DQB1;HLA-DRA;HLA-DRB1;HLA-DRB5;HLA-E;LGMN;B2M;SLC11A1;CALR;CD74	8.96142	5.93e-14
GOBP_CELLULAR_RESPONSE_TO_TOPOLOGICALLY_INCORRECT_PROTEIN	PIGBOS1;STUB1;RACK1;AGR2;TMED2;PACRG;CREB3L4;DAXX;ERN1;PPP1R15A;SDF2L1;HSPB8;SERP1;HSPA1A;HSPA1B;HSPA5;HSPA6;HSPA8;HSPA9;HSPD1;DNAJB9;ATF3;NFE2L2;PIK3R1;DNAJC10;SELENOS;PTPN1;CCND1;TMBIM6;XBP1;PPP1R15B;MBTPS1;DERL3;EIF2AK3;BAG3;HERPUD1	5.62465	6.27e-14
GOBP_ACUTE_INFLAMMATORY_RESPONSE	CEBPB;PARK7;NLRP3;C2CD4A;ADRA2A;EDNRB;A2M;F3;FN1;ALOX5AP;NUPR1;B4GALT1;GSTP1;HLA-E;HP;IGHG1;IL1A;IL1B;IL6ST;C2CD4B;OSM;SERPINA1;PLSCR1;TREM1;SELENOS;PTGER3;PTGS2;S100A8;SAA1;TFRC;TNF;C3;VCAM1;MYLK3;CD163	5.81298	6.44e-14
GOBP_REGULATION_OF_PROTEIN_POLYMERIZATION	ARPC5;ARPC3;ARPC1B;ARPC2;AKAP9;CDC42EP3;TRIOBP;CORO1A;ADD3;MTPN;ELN;CTTN;EPS8;PTK2B;MAPRE3;COTL1;GRB2;RANGRF;PYCARD;GSN;HCK;HCLS1;HSPA1A;HSPA1B;HSP90AA1;RHOA;STMN1;ARL2;MAP1B;MET;TPPP3;PFN1;PFN2;TWF1;SLAIN2;RAC1;RPS3;CCL21;SPTBN1;SPTBN2;TMSB4X;VASP;VDAC2;CAPZA2;MYADM;TMSB10;ARHGAP18;PDE4DIP	4.15423	6.48e-14
GOBP_POSITIVE_REGULATION_OF_HEMOPOIESIS	TRIB1;LILRB2;NLRP3;EGR3;EVI2B;ZBTB1;FOXO3;FOS;XRCC6;GAS6;ANXA1;HCLS1;HLA-DRA;HLA-DRB1;HMGB1;ID2;IHH;IL7R;IL10;IL18;RHOA;LGALS1;LGALS3;LIF;CD46;MDK;MMP14;NEDD9;PNP;AXL;PTPRC;ACTB;VSIR;NFKBIZ;SMARCE1;SOX4;ZFP36L1;TGFB1;KLF10;TNF;TYROBP;XBP1;ZBTB16;NFKBID;CD83;CD74	4.3207	6.6e-14
GOBP_FORMATION_OF_PRIMARY_GERM_LAYER	COL4A2;COL5A1;COL5A2;COL6A1;COL8A1;COL11A1;COL12A1;CTNNB1;DUSP1;DUSP2;EPHA2;ETS2;EYA2;DKK1;KDM6B;FN1;GATA6;GJA1;CRB2;GRB2;HSBP1;ITGA3;ITGA5;ITGB1;ITGB2;ITGB4;LAMB1;LAMB3;MMP2;MMP14;PRKAR1A;MAP2K1;SFRP2;SOX17;HNF1B;WLS;KLF4	5.39666	7.83e-14
GOBP_REGULATION_OF_LEUKOCYTE_CHEMOTAXIS	CXCL13;CSF1R;DDT;DPP4;DUSP1;EDN1;AIF1;PTK2B;GAS6;HMGB1;CXCL8;MDK;MIF;NBL1;NEDD9;SERPINE1;LGMN;S100A14;PTN;RAC1;RAC2;RARRES2;CCL2;CCL3;CCL4;CCL5;CCL21;CXCL12;GPSM3;SPI1;THBS1;TNFAIP6;C3AR1;C5AR1;VEGFA;CALR;CD74	5.39666	7.83e-14
GOBP_ORGAN_GROWTH	CITED2;BASP1;PDLIM5;AKAP13;COMP;CXADR;ARX;DUSP6;ECM1;EDN1;ESR1;PI16;FGF7;WWC1;GATA4;GATA6;SERP1;IGF1;RBPJ;AR;JARID2;LEP;LEPR;MSX2;DDR2;PIM1;POR;BNC2;PRKAR1A;PRLR;PSAP;HEG1;IFT80;BCL2;RGS2;RGS4;SOD1;SOX9;STC1;STK4;TP73;WNT2;SORBS2;COL27A1;YBX3	4.38239	8.08e-14
GOBP_REGULATION_OF_CELL_SHAPE	MYL12B;CFDP1;CDC42EP3;MYL12A;PDPN;FERMT2;CORO1A;FGD4;CSF1R;EPS8;PTK2B;FGR;EPB41L3;FN1;PLXNB2;ANXA1;HCK;ITGB2;RHOA;RHOB;RHOC;RND3;MSN;MYH10;F11R;PLXNB1;PLXNB3;CDC42SE2;SHROOM3;RHOU;RAC1;RAC2;CCL2;CCL3;TPM1;VEGFA;EZR;LST1;ARHGAP18;SLC9A3R1;SEPTIN7	4.80912	8.28e-14
GOBP_ESTABLISHMENT_OF_PROTEIN_LOCALIZATION_TO_MEMBRANE	CD24;TOMM6;RACK1;LYPLA1;CIB1;MTX2;VAMP5;SEC61B;RAB31;RAB3IP;SLC51B;ROMO1;RILPL2;ACSL3;ARL6IP1;TRAM1;SEC61G;MACF1;SAMM50;TIMM13;TIMM8B;GOLGA4;TRARG1;ANK3;CHMP4A;SEC61A1;HSPA5;HSP90AA1;ITGAM;ITGB2;KCNE1;KRT18;TOMM5;AFDN;NACA;ATP1B1;FIS1;NDUFA13;WDR83OS;TOMM7;VPS35;BID;SDCBP;SLC1A1;SPTBN1;SRP9;SRP14;SSR2;SSR3;SEC62;CAMLG;EMC6;RAB34;RAB11A;PDCD5;PKDCC;GCC2	3.55883	8.3e-14
GOBP_RESPONSE_TO_ESTRADIOL	ARPC1B;TXNIP;RUVBL2;ADCYAP1R1;COL1A1;CRYAB;CCN2;CTNNB1;CYP1B1;NQO1;ENDOG;ESR1;GJB2;GPX4;ANXA1;IGFBP2;IHH;IL10;AREG;LEP;MAP1B;MMP2;MSX2;PAM;PTCH1;PTGS2;CCND1;SFRP1;STAT3;NR2F2;TGFB1;CALR;CAT;SOCS2;CFLAR;ALDH1A2	5.55842	8.31e-14
GOBP_ANTIGEN_PROCESSING_AND_PRESENTATION_OF_EXOGENOUS_PEPTIDE_ANTIGEN_VIA_MHC_CLASS_II	IFI30;CTSD;CTSL;CTSS;FCER1G;HLA-DMA;HLA-DMB;HLA-DPA1;HLA-DPB1;HLA-DQA1;HLA-DQA2;HLA-DQB1;HLA-DRA;HLA-DRB1;HLA-DRB5;LGMN;B2M;CD74	19.614	8.39e-14
GOBP_NEGATIVE_REGULATION_OF_TRANSFERASE_ACTIVITY	HIPK3;TRIB1;SPRY1;CDKN1A;CDKN1C;RACK1;HEXIM1;PRDX3;PKIG;IRAK3;PARK7;GADD45A;DUSP1;EIF4A2;CHORDC1;PDCD4;SFN;PHPT1;PYCARD;GSTP1;HMGCR;HNRNPU;DNAJA1;HSPB1;APOE;IL1B;MLLT1;GADD45B;NPM1;DDR2;RTRAF;ERRFI1;PPIA;PPP2R5A;PRKAR1A;HEG1;PTPN1;PTPRC;RGS2;RPL5;RPL11;RPL37;RPS7;RPS15;RPS20;SFRP1;SFRP2;DEPTOR;SORL1;NR2F2;THY1;TNFAIP3;ZFP36;CAV1;IRS2;MIDN;GPRC5A;RPL23	3.48944	1.03e-13
GOBP_ANION_TRANSPORT	CEBPB;ARL6IP5;SLC34A2;PDPN;GIPC1;AHCYL1;SLC2A6;SLC16A10;CLIC1;CLIC2;CLNS1A;SLC15A4;SLC25A29;SLC51B;SLC43A2;EMB;CLDN4;SLC26A2;EDN1;ARL6IP1;FOLR1;GABRP;SERINC5;MPC2;CLIC4;GJA1;SLC25A4;SLC25A5;SLC25A6;SLC25A24;SLC2A8;ANXA1;IL1A;IL1B;AQP9;ITGB1;LEP;LRP2;MGST1;MIF;CYB5R1;SLC25A3;PLA2G2A;PLA2G5;FXYD1;FXYD3;SLC38A2;SLC47A1;MAP2K6;PSAP;PTGS2;RGS2;RGS4;SLC39A8;SFRP4;SLC1A1;SLC1A7;SLC2A1;SLC2A3;SLC3A1;SLC3…	2.6771	1.03e-13
GOBP_METAL_ION_HOMEOSTASIS	CORO1A;CLIC2;ADM;CP;CYB561;CYBA;EDN1;EDNRA;EDNRB;ALAS2;PTK2B;FKBP1A;FLNA;PRND;FTH1;FTL;GNAI2;ANK3;SLC40A1;HIF1A;APOE;IL1A;ARF1;LCN2;LTF;MT1E;MT1F;MT1G;MT1H;MT1M;MT1X;MT2A;MYC;ATOX1;ATP1A1;ATP1B1;ATP1B3;ATP2A2;ATP2B1;NT5E;FIS1;SLC25A37;ATP6V1A;TMEM165;B2M;S100A14;PTPRC;SELENOK;BCL2;S100A8;S100A9;SCN7A;SCNN1A;CCL3;CCL5;CCL21;CXCL12;SLC39A8;SLC1A1;SLC11A1;SOD1;SOD2;SRI;STC1;TMBIM6;TFRC;TGM2;THY1;TPT…	2.65855	1.05e-13
GOBP_BONE_MINERALIZATION	OSR2;COL1A2;OSR1;COMP;PHOSPHO1;SGMS2;ECM1;PTK2B;FGR;GPC3;HIF1A;IGF1;CCN1;LEP;LTF;MGP;ATP2B1;DDR2;SBDS;WNT4;ASPN;LGR4;SRGN;TENT5A;PTGS2;IFT80;PTN;CCL3;BMPR1B;SOX9;TGFB1;KLF10;TWIST1;FBXL15;PKDCC;EIF2AK3	5.4937	1.1e-13
GOBP_RIBOSOME_BIOGENESIS	NSA2;EMG1;C1D;DDX17;DDX52;RPL35;BUD23;PIH1D2;DDX3X;GLUL;NOP53;ISG20;RPSA;RBIS;GTF2H5;RPL10A;SNU13;NPM1;PA2G4;RPS27L;MRPS2;SBDS;RPL26L1;RSL24D1;NGRN;TRMT112;PIN4;MRPL20;NOP10;NHP2;RAN;RPL5;RPL6;RPL7;RPL7A;RPL10;RPL11;RPL23A;RPL24;RPL26;RPL27;RPL35A;RPL38;RPLP0;RPS5;RPS6;RPS7;RPS8;RPS14;RPS15;RPS16;RPS17;RPS19;RPS21;RPS24;RPS25;RPS27;RPS28;MRPL36;RPL14;DDX21;EIF4A3	3.30931	1.12e-13
GOBP_RESPONSE_TO_RADIATION	TANK;CDKN1A;NET1;CDS1;RUVBL2;CARD16;CIRBP;PLK3;COL3A1;CRIP1;CRYAB;COPS9;CYBA;GADD45A;EEF1D;EGR1;ZBTB1;FOS;ABCA4;XRCC6;GRB2;ANXA1;HIF1A;HMGN1;HMGCR;HSPA5;ID2;IFI16;IL1A;ITGB1;JUND;KCNE1;RHOB;GTF2H5;MDM2;MEIS2;MFAP4;MGMT;MME;MMP2;MT-ND3;MYC;NPHP1;NPM1;MAP3K20;PER1;PIK3R1;PPID;PPP1CA;PPP1CB;USP47;MAPK10;PTGS2;PTPRC;RBM4;CCND1;BCL2;RP1;RPL26;CXCL12;PRDM1;SFRP1;SFRP2;NUCKS1;NABP1;SNAI2;SOD2;THBD;TIMP1…	2.8066	1.2e-13
GOBP_REGULATION_OF_FIBROBLAST_PROLIFERATION	CDKN1A;IFI30;CTNNB1;EREG;ESR1;FN1;FOSL2;FTH1;GAS6;NUPR1;GSTP1;IGF1;JUN;LIF;MIF;MYC;DDR2;PAWR;MED31;PDGFRA;BRK1;CD248;S100A6;SFRP1;SOD2;WNT2;MED25;CAV1;SPHK1;CD74	6.8987	1.25e-13
GOBP_MRNA_PROCESSING	MBNL2;SRRM1;SAP18;DDX17;CELF2;AHCYL1;PAPOLA;HNRNPA0;CIRBP;CLNS1A;DDX5;ERN1;HNRNPA3;SF3B1;SRRM2;LSM5;LSM4;SYF2;PABPC1;LSM1;LSM3;RBMX;DCPS;TRA2A;HNRNPA1;HNRNPA2B1;HNRNPC;HNRNPF;HNRNPH1;HNRNPH3;HNRNPK;HNRNPU;HSPA8;IK;LGALS3;MBNL1;NCL;SNU13;NPM1;YBX1;SF3B6;LSM7;LUC7L3;PNN;AURKAIP1;RBM38;RBM25;UBL5;RBBP6;RBM3;RBM4;SFPQ;SRSF2;SRSF3;SRSF5;SRSF7;TRA2B;SNRPB;SNRPB2;SNRPC;SNRPD1;SNRPD2;SNRPE;SNRPF;SNRPG;SN…	2.68337	1.27e-13
GOBP_EMBRYONIC_ORGAN_MORPHOGENESIS	CITED2;TMED2;TRIOBP;CTHRC1;OSR2;DNAAF1;COL11A1;OSR1;CTNNB1;DLX5;EDN1;EDNRA;EFNA1;EPHA2;ENG;HIPK1;STOX1;ALDH1A3;FBN1;EFEMP1;PPP1R35;CLUAP1;FOLR1;IFT172;GATA2;GATA4;CRB2;HIF1A;HOXB5;HOXB6;HOXB7;HES1;ID2;CCDC39;IHH;INSIG1;MMP14;MSX1;MYO6;PDGFRA;PRRX1;AHI1;CCDC40;IFT57;RPL38;SOX17;PHACTR4;SOD1;SOX9;TBX3;HNF1B;ZEB1;TWIST1;PAX8;CEP290;FUZ;SLC44A4;SLC9A3R1;HAND2;EIF4A3	3.37934	1.28e-13
GOBP_POSITIVE_REGULATION_OF_REACTIVE_OXYGEN_SPECIES_METABOLIC_PROCESS	CDKN1A;PARK7;ROMO1;CYBA;CYP1B1;GADD45A;PTK2B;FOXO3;GNAI2;H19;GRB2;GSTP1;ITGAM;ITGB2;LEP;MT-CO2;NFE2L2;CLEC7A;SLC5A3;SOD1;SOD2;TGFB1;THBS1;TSPO;TYROBP;AKR1C3;CD36	8.03806	1.34e-13
GOBP_CELLULAR_RESPONSE_TO_HYDROGEN_PEROXIDE	PPIF;NET1;KLF2;RACK1;PARK7;CYP1B1;NQO1;EDN1;ENDOG;ERN1;FOXO3;KDM6B;ANXA1;APEX1;IL10;RHOB;MAP3K5;MET;NFE2L2;DDR2;PAWR;OSER1;AXL;PLEKHA1;RPS3;TNFAIP3;TXN;NR4A3;MAP1LC3A;CAT;SPHK1	6.5551	1.41e-13
GOBP_NEGATIVE_REGULATION_OF_EXTRINSIC_APOPTOTIC_SIGNALING_PATHWAY	PARK7;CTNNA1;DDX3X;CTTN;EYA2;GCLC;GCLM;GSTP1;HMGB2;HSPA1A;HSPA1B;ICAM1;IGF1;IL1A;IL1B;ITGA6;AR;LGALS3;LMNA;MCL1;SERPINE1;FAIM;BCL2;SFRP2;SNAI2;PRDX2;THBS1;TNF;TNFAIP3;NRP1;CFLAR;ARHGEF2	6.26288	1.52e-13
GOBP_CELLULAR_RESPONSE_TO_INTERFERON_GAMMA	ACTR2;DAPK1;EDN1;AIF1;FLNB;RPL13A;GAPDH;GBP1;GBP2;GBP3;GSN;HCK;HLA-DPA1;IRF8;IFNGR1;IRF1;KIF5B;MRC1;PARP14;CCL2;CCL3;CCL3L1;CCL4;CCL5;CCL20;CCL21;TLR2;ACTG1;TNF;VIM;WAS;ZYX;CLDN1;CD47;CDC42	5.60027	1.53e-13
GOBP_CELL_ADHESION_MEDIATED_BY_INTEGRIN	CIB1;CXCL13;COL16A1;CYP1B1;DPP4;EFNA1;EPHA2;FBN1;ICAM1;ITGA6;ITGA3;ITGA5;ITGAM;ITGAX;ITGB1;ITGB2;ITGB4;ITGB8;LIF;MUC1;SERPINE1;PODXL;CCL5;CCL21;SFRP2;SNAI2;IFT74;EMILIN2;PLPP3;LPXN	6.77959	1.77e-13
GOBP_POSITIVE_REGULATION_OF_TRANSLATION	TOB1;CIRBP;CYP1B1;DDX3X;EEF2;EIF5A;PTK2B;PPP1R15A;PLXNB2;PABPC1;SERP1;COA3;HNRNPU;EIF3E;RHOA;KRT17;NPM1;YBX1;RPS27L;NGRN;PKM;POLR2G;RBM3;RBM4;RPL5;RPL26;RPS4X;RPS9;CCL5;UPF3A;SOX4;THBS1;TNF;VIM;CNBP;FXR1;YBX3;EIF3D;EIF4A3	4.92415	1.79e-13
GOBP_CELL_KILLING	TUBB4B;GNLY;CTSC;CHGA;CORO1A;ROMO1;CTSH;CD55;TUBB;CADM1;GAPDH;CFH;HLA-A;HLA-B;HLA-DRA;HLA-DRB1;HLA-E;HMGN2;HSP90AB1;ICAM1;IGHG1;IL7R;IL10;IL18;ITGAM;KIF5B;LEP;LTF;LYZ;ARRB2;PRDX1;SERPINB9;TREM1;ARL8B;B2M;PTPRC;NECTIN2;RPL30;RPS19;S100A12;CLEC7A;SPI1;STXBP2;C3;TYROBP;CD59	4.17131	1.86e-13
GOBP_FEMALE_SEX_DIFFERENTIATION	CEBPB;ADCYAP1R1;CTNNA1;A2M;EREG;ESR1;FOXO3;NR5A1;TIPARP;NUPR1;ANG;HSPA5;INSR;LEP;LRP2;ARRB2;MMP2;MMP14;PDGFRA;PGR;WNT4;AXL;PTX3;PLEKHA1;BCL2;SFRP1;BMPR1B;SLIT3;SOD1;TBX3;NR2F2;TNFAIP6;UBB;VEGFA;ARID5B;ADAMTS1	5.36907	1.9e-13
GOBP_RESPONSE_TO_CARBOHYDRATE	RACK1;TXNIP;COL6A2;CCN2;ADRA2A;CYBA;NQO1;EGR1;ENDOG;ERN1;PTK2B;FOXO3;PLCB1;MPC2;ZBTB20;GAS6;GATA4;GCLC;GCLM;GLUL;HIF1A;HLA-DRB1;ICAM1;IL1A;IL1B;RHOA;LEP;LPL;MAP1B;PIM3;SERPINF1;PFKL;CCDC186;SELENOS;MAP2K3;MAP2K6;PTGS2;RBM4;TRA2B;CLEC7A;SOD2;SOX4;SRI;ZFP36L1;HNF1B;THBS1;TNF;UCP2;XBP1;CAT;IRS2;HMGN3	3.73973	1.94e-13
GOBP_CELLULAR_METAL_ION_HOMEOSTASIS	CORO1A;CLIC2;CP;CYB561;CYBA;EDN1;EDNRA;ALAS2;PTK2B;FKBP1A;FLNA;PRND;FTH1;FTL;SLC40A1;HIF1A;APOE;IL1A;ARF1;LCN2;MT1E;MT1F;MT1G;MT1H;MT1M;MT1X;MT2A;MYC;ATOX1;ATP1A1;ATP1B1;ATP1B3;ATP2A2;ATP2B1;FIS1;ATP6V1A;TMEM165;PTPRC;SELENOK;BCL2;S100A8;S100A9;SCNN1A;CCL3;CCL5;CCL21;CXCL12;SLC39A8;SLC1A1;SLC11A1;SOD1;SRI;STC1;TMBIM6;TFRC;TGM2;THY1;TPT1;HSP90B1;YWHAE;SLC30A1;SLC30A2;CALB2;ATP13A3;CYBRD1;CALM1;NCO…	2.86313	2.06e-13
GOBP_CARTILAGE_DEVELOPMENT	CHI3L1;OSR2;COL1A1;COL3A1;COL11A1;OSR1;COMP;CCN2;CTNNB1;CTSK;ECM1;EDN1;EFEMP1;SULF1;HIF1A;CCN1;IHH;ITGB8;LEP;SMAD5;MAF;MDK;MGP;MSX1;MSX2;NFIB;OGN;PRRX1;POR;IFT80;BGN;SFRP2;BMPR1B;SNAI2;SOX9;STC1;ZEB1;TGFB1;TGFBI;TIMP1;ZBTB16;COL27A1;SERPINH1;PKDCC;EIF2AK3;HAND2;CD44	4.06644	2.21e-13
GOBP_RESPONSE_TO_BMP	TOB1;SPINT2;FSTL1;COMP;DDX5;DLX5;EGR1;ENG;FBN1;DKK1;SULF1;GATA4;GATA6;GPC3;PDCD4;CRB2;HES1;CCN1;RBPJ;ILK;ITGA3;LRP2;SMAD5;SMAD9;MSX1;MSX2;NBL1;CRIM1;HTRA1;SFRP1;SFRP2;SFRP4;SKIL;BMPR1B;SORL1;SOX9;SPINT1;TGFB1;LEFTY2;TNFAIP6;UBE2D3;FBXL15;CHRDL1;GDF15	4.31571	2.33e-13
GOBP_LIPID_BIOSYNTHETIC_PROCESS	ABCA8;CDS1;SORBS1;PTGES3;PLAAT3;MGLL;PTPMT1;ADM;CRABP2;DAB2;DGKH;SGMS2;SPTSSA;EDN1;EGR1;FABP5;ACSL1;ACSL3;ACSL4;ALDH1A3;ALDH3B1;FDFT1;FDPS;FDXR;SLC44A1;ALOX12;NR5A1;SERINC5;ZBTB20;SH3YL1;GK;ANG;GPX4;ORMDL2;GSTP1;ANXA1;HMGCR;HMGCS1;APOC1;APOE;IGFBP7;CCN1;IL1A;IL1B;IMPA2;INSIG1;CERKL;LDLR;LEP;LPL;ASAH1;MIF;NDUFAB1;ATP1A1;NFKB1;PAM;PBX1;PDK4;ACSL5;CYB5R1;PIGF;PIK3R1;PLP1;PLSCR1;DPM3;WNT4;POR;AGPAT5;…	2.32106	2.58e-13
GOBP_CELL_SUBSTRATE_JUNCTION_ORGANIZATION	SORBS1;FERMT2;COL16A1;CTTN;PTK2B;FN1;MACF1;LAMTOR2;APOD;ITGA6;ITGA5;ITGB4;RHOA;LIMS1;MMP14;PIK3R1;WNT4;RAC1;BCL2;ROCK1;S100A10;SDC4;SFRP1;DST;THBS1;THY1;TLN1;ACTG1;VCL;VEGFA;ACTN1;NRP1	6.08177	2.85e-13
GOBP_REGULATION_OF_CHEMOTAXIS	SEMA6B;SEMA3C;CXCL13;CSF1R;DDT;DPP4;DUSP1;GPR183;EDN1;AIF1;F3;PTK2B;GAS6;HMGB1;HSPB1;CXCL8;MDK;MET;MIF;NBL1;NEDD9;SERPINE1;PDGFRA;LGMN;SEMA3G;S100A14;PTN;RAC1;RAC2;RARRES2;CCL2;CCL3;CCL4;CCL5;CCL21;CXCL12;GPSM3;SPI1;TGFB1;THBS1;TMSB4X;TNFAIP6;C3AR1;C5AR1;VEGFA;CXCR4;SEMA3B;CALR;NRP1;SEMA5A;CD74	3.7489	3.02e-13
GOBP_MALE_GAMETE_GENERATION	WFDC2;CIB1;PRDX4;CETN2;ADAM28;CCNI;IFT27;ADCYAP1R1;PACRG;CREM;CFAP54;CREB3L4;CFAP206;DEFB1;SPAG17;CFAP221;FOXJ1;SYNE1;SUN1;CADM1;CFAP65;CATSPERD;GALNT3;DPCD;RAI14;SPAG8;MYCBP;GJA1;TSSK4;CFAP157;CFAP47;GPX4;IFT81;SLC2A8;HMGB2;HOXA10;BIRC3;DNAJA1;IL1A;AR;SEPTIN2;NPHP1;PAEP;SERPINA5;PAIP2;HOOK1;HSPB11;SPA17;SPATA6;LZTFL1;MNS1;STRBP;LGR4;CFAP44;AXL;TSNAXIP1;PTCH1;NECTIN2;PLEKHA1;RFX2;RGS2;BRD2;SOX17;…	2.46381	3.12e-13
GOBP_POSITIVE_REGULATION_OF_NITRIC_OXIDE_METABOLIC_PROCESS	KLF2;CLU;AGTR2;EDN1;AIF1;PTK2B;DDAH2;DDAH1;HBB;HSP90AA1;HSP90AB1;IL1B;INSR;ASL;PTGS2;PTX3;CLEC7A;SOD2;TNF;KLF4;CD36	11.9423	3.22e-13
GOBP_REGULATION_OF_MRNA_PROCESSING	MBNL2;SRRM1;SAP18;DDX17;CELF2;AHCYL1;PAPOLA;CIRBP;CLNS1A;DDX5;RBMX;TRA2A;HNRNPA1;HNRNPA2B1;HNRNPK;HNRNPU;HSPA8;MBNL1;NCL;NPM1;RBM38;RBM25;RBM3;RBM4;SRSF2;SRSF3;SRSF7;TRA2B;SON;ZFP36L1;WDR77;FXR1;SRSF9;QKI;RBM39;PRDX6;WTAP;RBM8A	4.93916	3.34e-13
GOBP_HEART_PROCESS	AKAP9;CELF2;CHGA;AKAP13;CLIC2;ADM;CCN2;CXADR;DES;DSG2;DSP;AGTR2;EDN1;EDNRA;EDNRB;FLNA;GATA4;GATA6;GCH1;GJA1;GJA5;GNAI2;RANGRF;GSN;HSP90AA1;JUP;KCNE1;SMAD5;MDM2;ATP1A1;ATP1B1;ATP2A2;ATP2B1;PDE4B;PKP2;FXYD1;MAP2K3;MAP2K6;RGS2;RGS4;S100A1;SLC1A1;SOD1;SRI;STC1;TNF;TPM1;SUMO1;YWHAE;CXCR4;IRX3;CALM1;CALM2;CAV1;CDC42	3.51543	3.35e-13
GOBP_ENDODERM_FORMATION	COL4A2;COL5A1;COL5A2;COL6A1;COL8A1;COL11A1;COL12A1;CTNNB1;DUSP1;DUSP2;DKK1;FN1;GATA6;GRB2;HSBP1;ITGA5;ITGB2;LAMB1;LAMB3;MMP2;MMP14;MAP2K1;SOX17;HNF1B	9.24004	3.36e-13
GOBP_LIPOPOLYSACCHARIDE_MEDIATED_SIGNALING_PATHWAY	TRIB1;CARD16;CD55;LY96;HCK;IL1B;IL18;IRAK1;IRAK2;LTF;MIF;NFKBIA;CCL2;CCL3;CCL5;SPI1;PRDX2;TGFB1;TLR2;TNF;TNFAIP3;MTDH;CD14;LY86;CD36	8.61371	3.41e-13
GOBP_POSITIVE_REGULATION_OF_LEUKOCYTE_PROLIFERATION	CD24;CDKN1A;LILRB2;CORO1A;CSF1R;CSF2RA;CD55;GPR183;AIF1;PYCARD;ANXA1;HLA-A;HLA-DMB;HLA-DPA1;HLA-DPB1;HLA-E;HMGB1;HES1;IGF1;IGFBP2;IL1A;IL1B;IL6ST;IL18;LEP;CD46;MIF;PNP;PRLR;PELI1;PTPRC;SELENOK;RAC2;BCL2;RPS3;CCL5;BST2;TFRC;VCAM1;IRS2;CD74;CD81	4.44988	3.47e-13
GOBP_STEM_CELL_DEVELOPMENT	CDH2;PDCD6;CITED2;SEMA6B;SEMA3C;MSI2;JAG1;EDN1;EDNRA;EDNRB;ENG;FN1;FOLR1;HIF1A;HES1;LAMA5;SEMA3G;PTPRC;BCL2;SNAI2;PHACTR4;SOX9;SOX10;TWIST1;SEMA3B;NRP1;ALDH1A2;SEMA5A;HAND2;CDC42	6.55329	3.48e-13
GOBP_POSITIVE_REGULATION_OF_PROTEIN_KINASE_B_SIGNALING	FERMT2;CHI3L1;PARK7;ENG;F3;STOX1;GAS6;H19;HCLS1;HSP90AA1;HSP90AB1;IGF1;IGFBP5;IL18;INSR;ITGB1;LEP;LRP2;ARRB2;MAZ;MET;OSM;AXL;MYDGF;RTN4;CCL3;CCL21;TGFB1;THBS1;TNF;TXN;AKR1C3;SEMA5A;MTDH;GDF15	5.40234	3.51e-13
GOBP_CELLULAR_RESPONSE_TO_STARVATION	CDKN1A;GABARAP;GABARAPL2;PLIN2;COMT;CTSK;FOXO1;FOXO3;FOS;GABARAPL1;GAS6;GLUL;DNAJC15;HNRNPA1;HSPA5;HSPA8;IFI16;MAP3K5;MAP1LC3C;ATF3;NFE2L2;SH3GLB1;PDK4;PMAIP1;WNT4;SLC38A2;WDR45B;BCL2;SFRP1;SLC2A1;KLF10;UCP2;UPP1;XBP1;CPEB4;SLC7A5;MAP1LC3B;MAP1LC3A;MFSD2A;AKR1C3;XPR1;DAPL1;EIF2AK3	4.34639	3.54e-13
GOBP_BIOMINERALIZATION	CEBPB;OSR2;COL1A1;COL1A2;OSR1;COMP;PHOSPHO1;SGMS2;ECM1;PTK2B;FGR;GAS6;GPC3;HIF1A;IGF1;CCN1;LEP;LTF;MGP;MSX2;ATP2B1;NT5E;DDR2;SBDS;WNT4;ASPN;LGR4;SRGN;TENT5A;PTGS2;IFT80;PTN;ROCK1;CCL3;BMPR1B;SOX9;SPP1;TGFB1;KLF10;TWIST1;FBXL15;WLS;PKDCC;EIF2AK3	4.25208	3.55e-13
GOBP_POSITIVE_REGULATION_OF_NEUROGENESIS	ACTR2;CRABP2;CTNNB1;CUX1;FN1;MACF1;PLXNB2;GOLGA4;HIF1A;HES1;ID2;ID4;IL1B;IL6ST;ITGB1;LIF;LRP2;CAPRIN1;MAP1B;MDK;MME;NAP1L1;SERPINF1;PLXNB1;PLXNB3;FAIM;MAP2K1;MAP2K2;RELN;PTN;SHTN1;RHEB;CXCL12;SKIL;SOX10;SPINT1;TGFB1;TGM2;TSPO;TLR2;TNF;TNFRSF1B;TP73;VEGFA;WNT2;CXCR4;METRN;SLC7A5;NUMB;NRP1;SEMA5A	3.72802	3.61e-13
GOBP_REGULATION_OF_FAT_CELL_DIFFERENTIATION	CDS1;CEBPB;ADIRF;FERMT2;CCDC85B;CCDC71L;JAG1;FOXO1;GATA2;GPS2;AAMDC;HNRNPU;HES1;ID2;ID4;INSIG1;LEP;LPL;MMP11;MSX2;PIM1;PTGS2;RARRES2;SFRP1;SFRP2;SNAI2;SOD2;ZFP36L1;ZFP36L2;STK4;KLF5;TGFB1;TGFB1I1;TNF;XBP1;ZFP36;ZBTB16;MEDAG;SYAP1	4.78575	3.69e-13
GOBP_ANTIGEN_PROCESSING_AND_PRESENTATION_OF_EXOGENOUS_PEPTIDE_ANTIGEN	IFI30;CTSD;CTSL;CTSS;FCER1G;HLA-A;HLA-DMA;HLA-DMB;HLA-DPA1;HLA-DPB1;HLA-DQA1;HLA-DQA2;HLA-DQB1;HLA-DRA;HLA-DRB1;HLA-DRB5;HLA-E;LGMN;B2M;CD74	13.0762	3.84e-13
GOBP_REGULATION_OF_ACTIN_FILAMENT_BUNDLE_ASSEMBLY	WASF2;FERMT2;SYNPO;CCN2;FLNA;RGCC;ID1;RHOA;RHOC;STMN1;TACSTD2;MET;F11R;SHANK1;PFN1;PFN2;PIK3R1;PLEK;WNT4;CCDC88A;RAC1;ROCK1;S100A10;SDC4;SFRP1;TJP1;ACTG1;TPM1;WAS;RHPN2;NRP1;CD47;CDC42	5.77003	3.85e-13
GOBP_MYELOID_LEUKOCYTE_ACTIVATION	CTSC;CHGA;CLU;AIF1;FCER1G;FGR;CD93;FN1;GATA2;GRN;PYCARD;ANXA1;ANXA3;HMGB1;HSPD1;IFNGR1;RBPJ;CXCL8;IL10;IL18;ITGAM;ITGB2;ITGB8;JUN;JUND;LCP2;LDLR;MIF;MT1G;PLA2G2A;PLSCR1;KMT2E;PTGDS;PTPRC;NECTIN2;RAC2;S100A12;S100A13;CCL3;CCL5;SLC11A1;SPI1;STXBP2;THBS1;TLR2;TNF;C5AR1;TYROBP;NR4A3;VAMP8;SPHK1;CD74	3.6595	3.92e-13
GOBP_CARDIOCYTE_DIFFERENTIATION	SPRY1;CITED2;SEMA3C;PDLIM5;AKAP13;CXADR;JAG1;EDN1;EDNRA;ENG;PI16;DKK1;KDM6B;FOLR1;CBY1;GATA4;GATA6;PDCD4;HNRNPU;HES1;IGF1;RBPJ;ITGB1;LMNA;ARRB2;MYH11;PDGFRA;RGS2;RGS4;SOX17;TBX3;TGFB1;TWIST1;VCAM1;VEGFA;IRX3;CALR;SORBS2;MYLK3;HAND2;CDC42	4.5255	4.19e-13
GOBP_MUSCLE_CELL_PROLIFERATION	TRIB1;CDKN1A;CITED2;CNN1;CTNNB1;CXADR;CYBA;EDN1;AIF1;ELN;EREG;ERN1;FOS;XRCC6;GATA6;GJA1;PDCD4;GNAI2;ANG;EFEMP2;ID2;APOD;IGF1;APOE;IGFBP3;IGFBP5;RBPJ;IL10;IL18;IRAK1;JARID2;JUN;RHOA;MAP3K5;MMP2;DDR2;OGN;PIM1;PRKAR1A;PTGS2;NDRG2;CCL5;SOD2;TGFB1;THBS1;TNF;TNFAIP3;TP73;TPM1;WNT2;NR4A3;CFLAR;ADAMTS1	3.59585	4.2e-13
GOBP_ENDODERMAL_CELL_DIFFERENTIATION	COL4A2;COL5A1;COL5A2;COL6A1;COL8A1;COL11A1;COL12A1;CTNNB1;DKK1;FN1;GATA6;GRB2;HSBP1;ITGA5;ITGB2;LAMB1;LAMB3;MMP2;MMP14;MAP2K1;SOX17;HNF1B	10.6603	4.25e-13
GOBP_ENDOMEMBRANE_SYSTEM_ORGANIZATION	PDCD6IP;AKAP9;TMED2;LMAN2;CLU;PLK3;COL5A1;GRAMD2A;STX2;MAPK15;SEC31A;EPB41L3;ARL6IP1;SYNE1;SUN1;TRAM1;FOLR1;BLOC1S1;MYOF;SERP1;CHMP2A;GOLGB1;ANK3;CHMP4A;GSN;SEC61A1;ANXA2;AR;KCNE1;LMAN1;ARL1;LMNA;RNASEK;ATP2A2;SERPINA5;SH3GLB1;HOOK1;ATP6V1D;WDR83OS;CHMP5;ATP6V1A;ATP6V0C;ATP6V0B;STX18;PLSCR1;RETREG1;TMED9;FNBP1L;ARL8B;LAPTM4B;SRGN;MAP2K1;MAP2K2;PLSCR4;CHMP1B;RTN4;SHTN1;PTPRC;NECTIN2;RFX2;S100A9;S1…	2.47402	4.39e-13
GOBP_MIDBRAIN_DEVELOPMENT	BASP1;YWHAQ;CKB;COX6B1;CTNNB1;DKK1;UQCRQ;HES1;HSPA5;RHOA;MBP;MSX1;NR4A2;ATP5PB;ATP5PF;PLP1;NDRG2;ACTB;S100A1;SFRP1;SFRP2;WNT2;YWHAE;YWHAH;WLS;CALM1;CALM2;DYNLL1;DLG5;CDC42	6.4457	4.84e-13
GOBP_NEGATIVE_REGULATION_OF_CYSTEINE_TYPE_ENDOPEPTIDASE_ACTIVITY	DNAJB6;LAMTOR5;PRDX3;PARK7;CARD16;CRYAB;CST3;DDX3X;ARL6IP1;TNFAIP8;PRDX5;GAS6;SFN;NR4A1;BIRC3;IFI16;LTF;ARRB2;SERPINB9;PLAUR;POR;USP47;PTGS2;SFRP2;THBS1;TNF;VEGFA;CAST;KLF4;CD44	6.4457	4.84e-13
GOBP_DEVELOPMENT_OF_PRIMARY_FEMALE_SEXUAL_CHARACTERISTICS	CEBPB;ADCYAP1R1;CTNNA1;A2M;EREG;ESR1;FOXO3;NR5A1;TIPARP;NUPR1;ANG;HSPA5;INSR;LEP;ARRB2;MMP2;MMP14;PDGFRA;PGR;WNT4;PTX3;PLEKHA1;BCL2;SFRP1;BMPR1B;SLIT3;SOD1;NR2F2;TNFAIP6;UBB;VEGFA;ARID5B;ADAMTS1	5.69411	5.15e-13
GOBP_MAINTENANCE_OF_PROTEIN_LOCATION_IN_CELL	KDELR1;KDELR2;PARK7;SYNE1;SUN1;ARL2BP;NR5A1;ANK3;GSN;HNRNPU;HSPA5;INSIG1;CHCHD10;ARL2;VPS13C;SRGN;CCDC88A;TWF1;SKP1;SORL1;TSPO;TMSB4X;TXN;CAV1;TMSB10	8.39253	5.21e-13
GOBP_POSITIVE_REGULATION_OF_ERK1_AND_ERK2_CASCADE	GPNMB;CIB1;FERMT2;CHI3L1;CAVIN3;PHB2;CSF1R;CCN2;DDT;GPR183;PTK2B;GAS6;GATA4;GNAI2;PYCARD;HLA-DRB1;HMGB1;ICAM1;IGF1;APOE;IL1A;JUN;ARRB2;MIF;DDR2;PDGFRA;PLA2G2A;PLA2G5;MAP2K1;PTPRC;ACTA2;RAP1A;RAP1B;CCL2;CCL3;CCL3L1;CCL4;CCL5;CCL20;CCL21;TGFB1;TNF;C5AR1;NRP1;CFLAR;HAND2;CD36;AKAP12;CD44;CD74	3.73712	5.63e-13
GOBP_LIPID_LOCALIZATION	ABCA10;ABCA8;CDS1;NPC2;KDM5B;STARD10;EHD1;OSBPL11;RBP7;CLU;PLIN2;SLC51B;CRABP2;SELENOM;DAB2;DBI;EDN1;FABP5;FABP6;ACSL1;ACSL3;ATP11A;ABCA4;PRELID1;GPS2;ANXA1;ANXA2;HDLBP;APOC1;APOD;APOE;IL1A;IL1B;AQP9;LDLR;LEP;LPL;LRP1;MIF;SMIM22;NFKB1;NFKBIA;FIS1;SERPINA5;LIMA1;ACSL5;PLA2G2A;PLA2G5;PLSCR1;PLTP;PMP2;GRAMD1C;VPS13C;ARL8B;MAP2K6;PSAP;PLSCR4;PTCH1;PTGS2;RBP1;SCP2;CIDEC;SLC2A1;SPP1;SQLE;STAR;THBS1;TSP…	2.66954	5.78e-13
GOBP_IMMUNOGLOBULIN_PRODUCTION	PHB2;SLC15A4;GAPT;SAMHD1;IGKV1-5;IGLV7-46;IGLV6-57;IGLV5-52;IGLV3-25;IGLV3-21;IGLV3-19;IGLV3-1;IGLV2-23;IGLV2-14;IGLV2-11;IGLV2-8;IGLV1-51;IGLV1-47;IGLV1-44;IGLV1-40;IGKV4-1;IGKV3-20;IGKV3-15;IGKV1-17;IGKV1-16;IGKV1-9;IGKV1-6;HLA-DMA;HLA-DMB;HLA-DPA1;HLA-DPB1;HLA-DQA1;HLA-DQA2;HLA-DQB1;HLA-DRA;HLA-DRB1;HLA-DRB5;HLA-E;HSPD1;IL10;DNAJB9;B2M;PTPRC;TMBIM6;TFRC;TGFB1;TNF;XBP1;RNF8	3.79086	6.12e-13
GOBP_CELLULAR_TRANSITION_METAL_ION_HOMEOSTASIS	CP;CYB561;ALAS2;PRND;FTH1;FTL;SLC40A1;HIF1A;ARF1;LCN2;MT1E;MT1F;MT1G;MT1H;MT1M;MT1X;MT2A;MYC;ATOX1;ATP6V1A;S100A8;S100A9;SLC39A8;SLC1A1;SLC11A1;SOD1;SRI;TFRC;SLC30A1;SLC30A2;CYBRD1;NCOA4;ATP6V0D1;ATP6V1G1	5.4386	6.49e-13
GOBP_REGULATION_OF_PROTEOLYSIS_INVOLVED_IN_PROTEIN_CATABOLIC_PROCESS	TRIB1;STUB1;RACK1;CTSC;GIPC1;PARK7;GABARAP;GABARAPL2;CLU;PLK3;DAB2;DNAAF4;EFNA1;PTK2B;RYBP;HSPBP1;RNF144B;SVIP;ARIH1;RNF19A;NUPR1;GCLC;NOP53;HSPA1A;HSPA1B;HSP90AB1;APOE;MDM2;NFE2L2;UBXN1;PSME1;PSME2;RPL5;RPL11;RPS7;SDCBP;SUMO2;ELOB;TMF1;UBB;SUMO1;LAPTM5;CAMLG;CAV1;EIF3H;ZFAND2A;RPL23;ATP5IF1;HERPUD1;RBX1	3.71595	6.72e-13
GOBP_POSITIVE_REGULATION_OF_ION_TRANSPORT	COX17;AKAP9;CEBPB;AHCYL1;ADCYAP1R1;ADRA2A;CTSS;CNKSR3;EDN1;EDNRA;LRRC55;FLNA;ARL6IP1;ARC;NIPSNAP2;ANK3;IL1A;IL1B;ITGB1;KCNE1;KIF5B;LEP;LGALS3;ARRB2;MIF;NDUFA4;ATP1B1;ATP1B3;FXYD2;ATP2B1;PKP2;FXYD1;PLP1;MAP2K6;RELN;ACTB;CCL2;CCL3;CCL4;CCL5;CXCL12;SRI;STC1;TSPO;THY1;TMSB4X;TRH;SUMO1;CALM1;CALM2;ACTN4;VMP1;KMO;CAV1;VAMP8;SLC9A3R1;HOMER1;ATP2C2	3.30719	6.8e-13
GOBP_INTRINSIC_APOPTOTIC_SIGNALING_PATHWAY_BY_P53_CLASS_MEDIATOR	CDKN1A;DDX5;EIF5A;HIPK1;NUPR1;PYCARD;HINT1;HNRNPK;IFI16;MDM2;MIF;MSX1;MUC1;MYC;RRM2B;RPS27L;PMAIP1;DDIT4;BCL2;RPL11;RPL26;RPS7;PERP;TP73;UBB;PTTG1IP;CD44;CD74	6.9209	7.58e-13
GOBP_MATERNAL_PROCESS_INVOLVED_IN_FEMALE_PREGNANCY	CITED2;PRDX3;TMED2;CTSB;TCF23;ESR1;GJB2;IHH;AR;ITGA3;JUNB;LIF;PAM;TPPP3;PGR;WNT4;PTGS2;PTN;RGS2;PRDM1;SPP1;STC1;BSG;NR2F2	8.72621	8.19e-13
GOBP_TRANSITION_METAL_ION_HOMEOSTASIS	CP;CYB561;ALAS2;PRND;FTH1;FTL;SLC40A1;HIF1A;ARF1;LCN2;LTF;MT1E;MT1F;MT1G;MT1H;MT1M;MT1X;MT2A;MYC;ATOX1;SLC25A37;ATP6V1A;B2M;S100A8;S100A9;SLC39A8;SLC1A1;SLC11A1;SOD1;SOD2;SRI;TFRC;SLC30A1;SLC30A2;CYBRD1;NCOA4;ATP6V0D1;ATP6V1G1	4.75055	8.78e-13
GOBP_POSITIVE_REGULATION_OF_CELLULAR_CATABOLIC_PROCESS	TOB1;TRIB1;STUB1;RACK1;KCNQ1OT1;PARK7;GABARAP;CLU;PLK3;ADRA2A;DAB2;DAPK1;DCN;ENDOG;C9orf72;PTK2B;FOXO1;FOXO3;TNRC6B;TUT4;HSPBP1;RNF144B;SVIP;ARIH1;RNF19A;ZBTB20;HSPB8;PABPC1;LSM1;GCLC;GPD1;DCPS;SLC25A4;SLC25A5;NOP53;HIF1A;HMGB1;HNRNPU;HSPA1A;HSPA1B;IGF1;APOE;IL1B;INSR;MDM2;NFE2L2;YBX1;SH3GLB1;POLR2G;ZC3HAV1;PTPN1;SCOC;GAS5;ROCK1;SUMO2;BNIP3L;ZFP36L1;ZFP36L2;ELOB;TNF;TNFRSF1B;TWIST1;SUMO1;VDAC1;ZF…	2.76607	8.86e-13
GOBP_ACTIN_CYTOSKELETON_REORGANIZATION	IQGAP2;CLDN3;CSF1R;CXADR;CTTN;EPS8;PTK2B;PHACTR1;FGF7;FLNA;CD2AP;ABL2;GRB2;PHPT1;GSN;ANXA1;HCK;HCLS1;RHOA;ARHGDIB;MDK;NEDD9;F11R;PDGFRA;PLEK;PTPN1;TJP1;EZR;ANTXR1;PDLIM4;NRP1;GMFG;CDC42	5.54801	9.08e-13
GOBP_CELL_ACTIVATION_INVOLVED_IN_IMMUNE_RESPONSE	FGL2;CHGA;CORO1A;NLRP3;SLC15A4;GPR183;GAPT;PTK2B;FCER1G;FGR;TMEM98;GATA2;CLEC4E;GRN;PYCARD;ANXA1;ANXA3;HLA-DMB;HLA-DRA;HLA-DRB1;HMGB1;HSPD1;ICAM1;IRF8;IL10;IL18;ITGAM;ITGB2;JUNB;LCP1;LGALS1;LGALS3;LRP1;CD46;MDK;POU2AF1;TCIM;PTGDS;PTPRC;RAC2;RPS6;S100A13;CCL3;NFKBIZ;SLC11A1;SPI1;STAT3;STXBP2;TFRC;TGFB1;TYROBP;XBP1;NR4A3;NFKBID;VAMP8;RNF8;ITM2A;CD74;CD81	3.2384	9.17e-13
GOBP_POSITIVE_REGULATION_OF_CHEMOTAXIS	CXCL13;CSF1R;EDN1;AIF1;F3;PTK2B;GAS6;HMGB1;HSPB1;CXCL8;MDK;MET;NEDD9;SERPINE1;LGMN;S100A14;PTN;RAC1;RAC2;RARRES2;CCL3;CCL4;CCL5;CCL21;CXCL12;GPSM3;SPI1;TGFB1;THBS1;TMSB4X;C3AR1;C5AR1;VEGFA;CXCR4;CALR;NRP1;SEMA5A;CD74	4.70562	1.11e-12
GOBP_FOREBRAIN_DEVELOPMENT	CDH2;ARPC5;SEMA6B;TACC2;C12orf57;EFHC1;COL3A1;CSF1R;CTNNB1;ARX;DLX5;DNAH5;EMX2;ALDH1A3;PHACTR1;DKK1;SYNE2;PLCB1;RPGRIP1L;SUN1;DPCD;GATA2;UQCRQ;ANXA3;HIF1A;HES1;DNAJB1;ID2;ID4;RBPJ;ITGAM;RHOA;LAMB1;LRP2;MDK;MSX1;NFIB;NR4A2;PCM1;WNT4;SLC38A2;AXL;RELN;B2M;RTN4;CXCL12;TRA2B;SLC2A1;SLIT3;TACC1;TBX3;ZEB1;NR2F2;TYROBP;UBB;YWHAE;BTG2;CXCR4;TCTN1;DYNC2H1;TTC21B;AKNA;TMEM14B;MFSD2A;NUMB;NRP1;ALDH1A2;SEMA5A…	2.88971	1.23e-12
GOBP_REGULATION_OF_SUBSTRATE_ADHESION_DEPENDENT_CELL_SPREADING	ARPC2;CIB1;PDPN;FERMT2;TRIOBP;DAB2;FBLN1;FLNA;GBP1;ILK;LIMS1;TACSTD2;MDK;NEDD9;P4HB;PKP2;RAC1;S100A10;DOCK5;ACTN4;CALR;NRP1;MYADM;CDC42	8.49003	1.26e-12
GOBP_CELL_DEATH_IN_RESPONSE_TO_OXIDATIVE_STRESS	RACK1;ARL6IP5;PARK7;NCOA7;CTNNB1;CYP1B1;ENDOG;FOXO3;GATA4;HIF1A;HSPB1;IL10;MCL1;MAP3K5;MET;NFE2L2;DDR2;P4HB;PAWR;PPIA;OXR1;BCL2;SFPQ;SLC1A1;SOD1;SOD2;TNF;TXN;NR4A3;NME5;PAGE4	5.88838	1.28e-12
GOBP_REGULATION_OF_ENDOTHELIAL_CELL_MIGRATION	PDCD6;CIB1;CXCL13;CSNK2B;DCN;GADD45A;AGTR2;EDN1;EFNA1;EPHA2;PTK2B;GATA2;GLUL;GRN;RGCC;ANXA1;ANXA3;HIF1A;HMGB1;HSPB1;APOE;JUP;RHOA;RHOB;MET;NFE2L2;ATP5F1A;ATP5F1B;SERPINF1;DNAJA4;MAP2K3;LGMN;ADAMTS9;PTGS2;PTN;RAC1;RRAS;SPARC;STC1;NR2F2;TGFB1;THBS1;TMSB4X;TNF;VEGFA;CALR;PLPP3;NRP1;SEMA5A;KLF4	3.63355	1.35e-12
GOBP_PROTEIN_LOCALIZATION_TO_EXTRACELLULAR_REGION	AP1M2;ERP29;CHGA;PARK7;COMP;ADRA2A;EDNRB;ACSL4;FBN1;FOXO1;CD2AP;MPC2;ARFGAP3;SERP1;GLUL;ANG;CAVIN1;ANXA1;HIF1A;HLA-DRB1;HMGCR;ICA1;IGF1;APOE;IL1A;IL1B;IL1RN;ARL4D;LEP;LLGL2;LTBP1;LTBP2;M6PR;PIM3;MIA2;MYH10;NBL1;PAM;PFKL;PLEK;PPIA;PPID;CCDC186;VPS35;RAB13;RBM4;RFX3;SAA1;CCL5;SFRP1;SLC16A1;SOX4;SRI;HNF1B;TGFB1;TLR2;TNF;TRH;UCP2;EZR;WLS;RAB11FIP1;CANX;IRS2;MIDN;HMGN3;STXBP5L	2.93551	1.39e-12
GOBP_RESPONSE_TO_STARVATION	CDKN1A;GABARAP;GABARAPL2;PLIN2;COMT;ADM;CTSK;FOXO1;FOXO3;FOS;GABARAPL1;GAS6;GLUL;DNAJC15;HNRNPA1;HSPA5;HSPA8;IFI16;MAP3K5;MAP1LC3C;ATF3;NFE2L2;SH3GLB1;PDK4;PMAIP1;WNT4;SLC38A2;WDR45B;BCL2;SFRP1;SLC2A1;KLF10;UCP2;UPP1;XBP1;ZFP36;CPEB4;SLC7A5;MAP1LC3B;MAP1LC3A;MFSD2A;LRP11;AKR1C3;XPR1;DAPL1;EIF2AK3;PAGE4	3.81391	1.48e-12
GOBP_ACTIN_FILAMENT_BASED_MOVEMENT	AKAP9;WASF2;PDPN;MYL6B;DSG2;DSP;FLNA;SYNE2;GATA4;GJA1;GJA5;RANGRF;GSN;JUP;KCNE1;CCDC88C;MYH2;MYH10;MYL6;MYO6;ATP1A1;ATP2A2;PDE4B;PKP2;FNBP1L;SHTN1;ACTA2;ROCK1;MYO1G;SRI;STC1;TPM1;SUMO1;WAS;ACTN4;CAV1	4.9203	1.5e-12
GOBP_T_CELL_DIFFERENTIATION	LILRB2;FGL2;KDELR1;NLRP3;CTNNB1;CTSL;GPR183;EGR1;EGR3;FCER1G;ZBTB1;FOXJ1;FOXO3;TMEM98;CLEC4E;PRELID1;ANXA1;HLA-DRA;HLA-DRB1;HMGB1;IHH;IL1A;IL1B;IL7R;IL18;IRF1;JUNB;RHOA;LEP;LEPR;CD46;MDK;PNP;PIK3R1;WNT4;B2M;PTPRC;BCL2;ACTB;RPL22;RPS6;PRDM1;VSIR;NFKBIZ;SMARCE1;SOD1;SOX4;SPI1;ZFP36L1;STAT3;ZFP36L2;ZEB1;PRDX2;XBP1;ZBTB16;NFKBID;CD83;CD74	3.22298	1.67e-12
GOBP_COLLAGEN_METABOLIC_PROCESS	COL1A1;COL1A2;COL5A1;CST3;CCN2;CTSB;CTSK;CTSL;CTSS;ENG;RGCC;HIF1A;IHH;ITGB1;ARRB2;MFAP4;MMP2;MMP7;MMP11;MMP14;DDR2;PCOLCE;ERRFI1;WNT4;RETREG1;MMP26;VSIR;TGFB1;TNXB;VIM;SERPINH1;MRC2	5.59363	1.67e-12
GOBP_KIDNEY_EPITHELIUM_DEVELOPMENT	CD24;SPRY1;BASP1;OSR1;CTNNB1;JAG1;AGTR2;EDNRA;EDNRB;FOXJ1;KANK2;GPC3;HOXB7;HES1;ILK;ARG2;LAMA5;LIF;TACSTD2;EPCAM;SMAD5;MYC;PBX1;PODXL;WNT4;AHI1;LGR4;PTCH1;BCL2;SDC4;SFRP1;SOX9;HNF1B;VEGFA;PAX8;IRX3;CAT;PROM1	4.61827	1.77e-12
GOBP_HETEROTYPIC_CELL_CELL_ADHESION	LILRB2;CXADR;DSG2;DSP;IL1B;IL1RN;IL10;ITGA5;ITGAX;ITGB1;ITGB2;JUP;MBP;NINJ1;PKP2;PTPRC;PERP;THY1;TNF;VCAM1;MYADM;KLF4;CD44;CD47	8.26631	1.92e-12
GOBP_REGULATION_OF_OSTEOBLAST_DIFFERENTIATION	TOB1;CEBPB;CEBPD;FERMT2;CTHRC1;TWIST2;CLIC1;CTNNB1;DDX5;JAG1;ID3;IGF1;IGFBP5;CCN1;IL6ST;ILK;JUND;AREG;LTF;SMAD5;MSX2;DDR2;CRIM1;WNT4;TENT5A;PTCH1;RORB;SFRP1;SFRP2;BMPR1B;SNAI2;SOX9;TNF;TNFAIP6;TWIST1;IFITM1;HAND2	4.71405	2.09e-12
GOBP_REGULATION_OF_CELL_PROJECTION_ASSEMBLY	ACTR2;ARPC2;WASF2;CDC42EP3;SDCCAG8;RAB3IP;DPYSL3;EPHA2;EPS8;PPP1R35;MAPK15;SYNE2;COBL;SH3YL1;INTU;HSP90AA1;ICAM1;TACSTD2;MAP4;ZMYND10;DCDC2;DYNC2LI1;PFN1;PFN2;PIK3R1;PLXNB3;PODXL;FNBP1L;MNS1;CCDC88A;BRK1;ODF2L;TWF1;RAC1;RAC2;RP1;CCL21;KLF5;VDAC3;WAS;EVI5;FUZ;FXR1;IFT88;CAV1;NRP1;CCP110;SEPTIN7;CDC42	3.64052	2.11e-12
GOBP_REGULATION_OF_AUTOPHAGY	DEPP1;PARK7;PLK3;DRAM2;DAPK1;DCN;EEF1A1;EIF4E;EIF4G2;CTTN;ENDOG;C9orf72;ERN1;MAPK15;FOXO1;FOXO3;ATP6V1C2;SVIP;GAPDH;GATA4;HSPB8;NUPR1;ABL2;CHMP4A;SLC25A4;PYCARD;SLC25A5;HIF1A;HMGB1;HSPB1;IFI16;IL10;IL10RA;LEP;LEPR;MCL1;MET;SH3GLB1;ATP6V1D;ATP6V1A;ATP6V1B2;ATP6V0C;ATP6V0B;CTSA;VPS13C;VPS35;CISD1;PSAP;BCL2;RHEB;SCOC;ROCK1;BNIP3L;STAT3;TSPO;VDAC1;SLC7A5;ATP6V0E1;ATP6V0D1;MTDH;DAPL1;TMEM59;BAG3;ATP6V…	2.99145	2.12e-12
GOBP_POSITIVE_REGULATION_OF_I_KAPPAB_KINASE_NF_KAPPAB_SIGNALING	LAMTOR5;AKAP13;CARD16;CTNNB1;ECM1;EEF1D;FKBP1A;FLNA;GAPDH;GJA1;HLA-DRB1;BIRC3;IL1A;IL1B;IRAK1;RHOA;RHOC;LGALS1;LTF;C18orf32;PELI1;REL;S100A4;S100A12;S100A13;CCL21;CLEC7A;BST2;TFRC;TSPAN6;TNF;TNFRSF1A;UBE2V1;WLS;TMEM101;TNFSF10;TNFRSF10B;CFLAR;DDX21;MTDH;VAPA;CD36;LITAF;CD74	3.98752	2.15e-12
GOBP_INTRACILIARY_ANTEROGRADE_TRANSPORT	IFT27;CLUAP1;TRAF3IP1;IFT172;IFT81;HSPB11;IFT57;IFT46;IFT80;IFT22;TTC26;IFT74;IFT88	42.409	2.23e-12
GOBP_OVULATION_CYCLE	CYP1B1;EGR1;A2M;EREG;ESR1;FOXO3;NR5A1;ANXA1;HSPA5;LEP;ARRB2;MDK;MMP2;PAM;PDGFRA;SERPINF1;PGR;AXL;MAP2K6;PTN;PTX3;PLEKHA1;BMPR1B;SLIT3;TNFAIP6;ADAMTS1	7.24331	2.24e-12
GOBP_REGULATION_OF_ACTIN_FILAMENT_LENGTH	ARPC5;ARPC3;ARPC1B;ARPC2;CDC42EP3;DSTN;TRIOBP;CORO1A;ADD3;PLEKHH2;MTPN;ELN;CTTN;EPS8;PTK2B;COTL1;GRB2;PYCARD;GSN;HCK;HCLS1;RHOA;LIMA1;PFN1;PFN2;PLEK;BRK1;TWF1;CCL21;CXCL12;SPTBN1;SPTBN2;TMSB4X;VASP;WAS;CAPZA2;SEMA5A;MYADM;TMSB10;ARHGAP18	4.3406	2.35e-12
GOBP_PLATELET_ACTIVATION	MYL9;MYL12A;PDPN;CLIC1;COL3A1;COMP;CSRP1;ADRA2A;ADRA2C;DGKH;FCER1G;FLNA;FN1;ALOX12;GNAS;HBB;HSPB1;APOE;IL6ST;ILK;F11R;PDGFRA;PLEK;PLSCR1;PPIA;AXL;ACTB;SAA1;THBD;TLN1;ACTG1;VCL;VWF;EMILIN2;ACTN1;CD9	4.81966	2.43e-12
GOBP_EPIDERMAL_CELL_DIFFERENTIATION	TXNIP;TRIOBP;CSTA;CTNNB1;JAG1;DSP;EPHA2;EREG;PALLD;FLG;FLNB;KAZN;FOSL2;MAFF;CLIC4;GATA6;INTU;SFN;ANXA1;HES1;RBPJ;IL1A;AQP3;IRF6;KRT7;KRT8;KRT10;KRT17;ASAH1;MSX2;MYO6;NME2;ERRFI1;MAP2K1;PTCH1;PLAAT4;ROCK1;SFRP4;SOD1;SPRR2F;ZFP36L1;STK4;TGM1;UGCG;ZFP36;IFT74;SLC44A4;AKR1C3;KLF4;SLC9A3R1	3.55464	2.66e-12
GOBP_POSITIVE_REGULATION_OF_BINDING	SPON1;LAMTOR5;PARK7;CTHRC1;CLIC2;CTNNB1;FKBP1A;MAPRE3;SPAG8;ANXA2;HMGB1;HMGB2;HES1;HSP90AB1;IGF1;APOE;EIF3E;STMN1;LRP1;MET;NME1;GMNN;PLAUR;B2M;RAN;RPL11;S100A10;NIBAN2;STK4;TGFB1;TWIST1;TXN;CALM1;CALM2;MED25;CAV1;EIF3D;EDF1;NRP1;KLF4;HAND2;DAZAP2	4.11701	2.83e-12
GOBP_REGULATION_OF_VIRAL_PROCESS	TNIP1;IFITM3;IFITM2;HEXIM1;DDX3X;FCN1;PABPC1;GSN;HLA-DRB1;HMGB1;IFI16;CXCL8;ISG20;LGALS1;LTF;LY6E;P4HB;PLSCR1;PPIA;PPID;RESF1;AXL;TMPRSS4;ZC3HAV1;PTX3;NECTIN2;BCL2;CCL5;SLPI;STAU1;BST2;DYNLT1;TNF;ZFP36;CXCR4;IFITM1;SNX3;BANF1;CH25H;CD74	4.30493	2.91e-12
GOBP_RNA_CATABOLIC_PROCESS	TOB1;IGF2BP2;HNRNPA0;KCNQ1OT1;CIRBP;SLFN13;DDX5;ERN1;TNRC6B;TUT4;CARHSP1;EDC4;LSM5;FUS;LSM4;SERBP1;PABPC1;LSM1;ANG;DCPS;HNRNPAB;HNRNPC;HNRNPU;APEX1;HSPA1A;HSPA1B;EIF3E;ISG20;NPM1;YBX1;MYEF2;LSM7;POLR2G;RBM38;TENT5A;PNRC2;ZC3HAV1;RNASE6;RNH1;GAS5;ROCK1;UPF3A;SLC11A1;SSB;ZFP36L1;ZFP36L2;TNFRSF1B;VIM;ZFP36;BTG2;TRIR;FXR1;SLIRP;YBX3;RNASET2;PABPC4;EIF4A3;RBM8A	3.16918	2.99e-12
GOBP_ESTABLISHMENT_OF_ENDOTHELIAL_BARRIER	CLDN3;EDNRA;EDNRB;PLCB1;RAPGEF1;ICAM1;IL1B;AFDN;MSN;F11R;RAP1A;RAP1B;ROCK1;TJP1;TNF;TNFRSF1A;VCL;VEGFA;EZR;CLDN1;MYADM;TJP2	9.28434	2.99e-12
GOBP_REGULATION_OF_DEVELOPMENTAL_GROWTH	CDKN1A;CITED2;BASP1;SEMA6B;SEMA3C;AGR2;CRABP2;CXADR;ADRB3;ARX;DPYSL2;DUSP6;EDN1;CTTN;PI16;PLCB1;WWC1;FN1;MACF1;GATA6;SERP1;GOLGA4;IFRD1;IGF1;APOE;RBPJ;INSR;AR;JARID2;LEP;MAP1B;PIM1;PPIB;LGMN;SEMA3G;RTN4;PTCH1;SHTN1;PTPRS;BCL2;RGS2;RGS4;CXCL12;SOD1;SPP1;STAT3;STK4;HNF1B;TP73;VEGFA;EZR;WNT2;CXCR4;SEMA3B;MFSD2A;YBX3;NRP1;SOCS2;SEMA5A;SPAG9;GDF15;CDH1	3.02568	3.03e-12
GOBP_REGULATION_OF_PROTEIN_LOCALIZATION_TO_PLASMA_MEMBRANE	RACK1;LYPLA1;CIB1;AGR2;SORBS1;AP2M1;LRRC15;DAB2;EPHA2;ACSL3;GBP1;RANGRF;AR;ITGA3;ITGB1;KIF5B;LGALS3;LRP1;MMP14;PIK3R1;PPP2R5A;ACTB;SPTBN1;TGFB1;TNF;EZR;NUMB;VAMP8;SQSTM1;PKDCC;TMEM59	5.64313	3.07e-12
GOBP_POSITIVE_REGULATION_OF_LEUKOCYTE_CHEMOTAXIS	CXCL13;CSF1R;EDN1;AIF1;PTK2B;GAS6;HMGB1;CXCL8;MDK;NEDD9;SERPINE1;LGMN;S100A14;PTN;RAC1;RAC2;RARRES2;CCL3;CCL4;CCL5;CCL21;CXCL12;GPSM3;SPI1;THBS1;C3AR1;C5AR1;VEGFA;CALR;CD74	5.86698	3.14e-12
GOBP_REGULATION_OF_MICROTUBULE_BASED_PROCESS	PDCD6IP;AKAP9;CDK2AP2;CIB1;DNAAF1;CFAP206;DEFB1;PPP1R35;MAPK15;MAPRE3;MACF1;CFAP45;SPEF1;TRAF3IP1;CHORDC1;CHMP2A;CHMP4A;RANGRF;HNRNPU;HSPA1A;HSPA1B;CCDC39;RSPH4A;RHOA;STMN1;STMND1;ARL2;MAP1B;MET;NPM1;CHMP5;CCDC40;CFAP298;CCNL1;CHMP1B;SLAIN2;RAC1;ROCK1;RPS3;BICD1;KIF9;TTC21B;CFAP69;MAP9;CFAP43;CEP70;CCDC65;DNAH11;TMEM67;ARHGEF2;DRC1;PDE4DIP	3.42054	3.4e-12
GOBP_POSITIVE_REGULATION_OF_EPITHELIAL_CELL_MIGRATION	PDCD6;CIB1;CTSH;EDN1;PTK2B;FGF7;GATA2;GRN;ANXA1;ANXA3;HIF1A;HMGB1;HSPB1;ITGA3;JUN;RHOB;MET;NFE2L2;ATP5F1A;ATP5F1B;ENPP2;PFN1;MAP2K3;LGMN;RAB25;RTN4;PTGS2;RAC1;RRAS;SOX9;SPARC;TGFB1;THBS1;TMSB4X;VEGFA;DOCK5;CALR;PLPP3;IRS2;RAB11A;NRP1;SEMA5A	4.08644	3.46e-12
GOBP_REGULATION_OF_CALCIUM_ION_TRANSPORT	MRLN;LILRB2;CORO1A;ADCYAP1R1;CLIC2;CTNNB1;ADRA2A;EFHB;CYBA;GRAMD2A;PTK2B;FKBP1A;NIPSNAP2;GEM;GNAI2;HES1;KCNE1;RHOA;LGALS3;C4orf3;ARRB2;ATP1B1;ATP2B1;PDE4B;SARAF;PLP1;PTGS2;BCL2;RGS4;RRAD;CCL2;CCL3;CCL4;CCL5;CXCL12;SRI;STC1;TMBIM6;TSPO;THY1;SUMO1;VDAC1;YWHAE;SLC30A1;CXCR4;AHNAK;CALM1;CALM2;VMP1;CAV1;SESTD1;HOMER2;HOMER1;ATP2C2	3.32074	3.53e-12
GOBP_MYELOID_CELL_HOMEOSTASIS	KLF2;CITED2;SLC15A4;ALAS2;FOXO3;GATA2;SLC25A5;ANXA1;HCLS1;HIF1A;HMGB1;HMGB2;HOXB6;PRMT1;HSPA1A;HSPA1B;HSPA9;ID2;LIPA;SMAD5;RHEX;PRDX1;PDE4B;TMEM14C;P4HTM;AXL;KMT2E;B2M;RPS6;RPS14;RPS17;RPS19;RPS24;SOD1;SPI1;ZFP36L1;STAT3;VEGFA;ZFP36;ATP5IF1;PTBP3	4.17386	3.55e-12
GOBP_MAMMARY_GLAND_EPITHELIUM_DEVELOPMENT	CEBPB;KDM5B;PHB2;CSF1R;EPHA2;ESR1;HIF1A;ID2;IRF6;AR;AREG;MGMT;MSX1;MSX2;PGR;WNT4;PRLR;RTN4;PTCH1;CCND1;TBX3;WNT2;DDR1;LBH;ATP2C2	7.43772	3.8e-12
GOBP_REGULATION_OF_ACTOMYOSIN_STRUCTURE_ORGANIZATION	WASF2;FERMT2;AKAP13;CCN2;EDN1;RGCC;RHOA;RHOC;STMN1;TACSTD2;MET;F11R;PFN1;PFN2;PIK3R1;WNT4;CCDC88A;RAC1;ROCK1;S100A10;SDC4;SFRP1;TJP1;ACTG1;TPM1;WAS;RHPN2;NRP1;MYLK3;CD47;CDC42	5.56578	4.07e-12
GOBP_DIGESTIVE_SYSTEM_DEVELOPMENT	AGR2;DNAAF1;COL3A1;CTNNB1;EDNRB;COBL;SPDEF;IFT172;GATA4;GATA6;HIF1A;HES1;ID2;CCDC39;IHH;IL6ST;CXCL8;INSR;PDGFRA;AHI1;CCDC40;LGR4;RARRES2;BCL2;PRDM1;SFRP1;SFRP2;SOX17;SOX9;SOX10;KLF5;HNF1B;TNF;CLMP;WLS;ALDH1A2;PKDCC	4.58032	4.17e-12
GOBP_APPENDAGE_DEVELOPMENT	SEMA3C;FERMT2;OSR2;COL3A1;OSR1;COMP;CRABP2;CTNNB1;DLX5;DKK1;RPGRIP1L;IFT172;B9D1;INTU;GPC3;HOXA10;IHH;ITGA6;IRF6;ITGB4;MBNL1;MSX1;MSX2;PAM;PBX1;MED31;MAP3K20;PRRX1;PTCH1;IFT80;SFRP2;SOX4;SOX9;TBX3;TWIST1;ZBTB16;TMEM231;DYNC2H1;TMEM107;ALDH1A2;PKDCC;HAND2	4.05633	4.22e-12
GOBP_CELLULAR_RESPONSE_TO_CORTICOSTEROID_STIMULUS	FBXO32;CYP1B1;EDN1;EIF4E;FOXO3;GJB2;ANXA1;HNRNPU;MT-ND3;ATP2B1;ATP5F1A;SERPINF1;PLAT;ERRFI1;DDIT4;SCNN1A;SGK1;ZFP36L1;ZFP36L2;STC1;KLF9;ZFP36;AKR1C3;CFLAR	7.8525	4.3e-12
GOBP_MITOCHONDRIAL_ELECTRON_TRANSPORT_CYTOCHROME_C_TO_OXYGEN	COX4I1;COX5B;COX6A1;COX6B1;COX6C;COX7A2;COX7B;COX7C;COX8A;MT-CO1;MT-CO2;MT-CO3;NDUFA4;CYCS;COX5A	21.7602	4.38e-12
GOBP_ANTIGEN_PROCESSING_AND_PRESENTATION_OF_EXOGENOUS_ANTIGEN	IFI30;CTSD;CTSL;CTSS;FCER1G;HLA-A;HLA-DMA;HLA-DMB;HLA-DPA1;HLA-DPB1;HLA-DQA1;HLA-DQA2;HLA-DQB1;HLA-DRA;HLA-DRB1;HLA-DRB5;HLA-E;LGMN;B2M;PSME1;CD74	9.80917	4.41e-12
GOBP_VIRAL_GENOME_REPLICATION	TNIP1;IFITM3;LAMTOR5;IFITM2;DDX3X;EEF1A1;GAS6;PABPC1;HSPA8;IFI16;IFI27;CXCL8;ISG20;LTF;NFIA;PCBP1;PCBP2;PLSCR1;PPIA;PPIB;PPID;RESF1;ZC3HAV1;BCL2;CCL2;CCL5;NUCKS1;SLPI;STAU1;BST2;TNF;DEK;IFITM1;BANF1;VAPA	4.83253	4.56e-12
GOBP_SMOOTH_MUSCLE_CELL_PROLIFERATION	TRIB1;CDKN1A;CNN1;CTNNB1;CYBA;EDN1;AIF1;ELN;EREG;ERN1;XRCC6;GJA1;PDCD4;GNAI2;ANG;EFEMP2;ID2;APOD;IGF1;APOE;IGFBP3;IGFBP5;IL10;IL18;IRAK1;JUN;RHOA;MAP3K5;MMP2;DDR2;OGN;PTGS2;NDRG2;CCL5;SOD2;TGFB1;THBS1;TNF;TNFAIP3;TPM1;NR4A3;ADAMTS1	4.02665	5.13e-12
GOBP_OUTFLOW_TRACT_MORPHOGENESIS	CITED2;SEMA3C;CTNNB1;JAG1;EDN1;EDNRA;ELN;ENG;FOLR1;GATA6;GJA5;HIF1A;HES1;RBPJ;ILK;JUN;LRP2;MSX2;SFRP2;SOX17;TBX3;TWIST1;VEGFA;NRP1;DHRS3;HAND2;CDC42	6.54785	5.2e-12
GOBP_HEPATICOBILIARY_SYSTEM_DEVELOPMENT	CITED2;CEBPB;DNAAF1;COBL;RPGRIP1L;CADM1;GATA6;ANXA1;HES1;CCDC39;IHH;IL10;JARID2;JUN;MDK;MET;MPST;WNT4;CCDC40;PTCH1;PTN;CCND1;SRSF5;SOX17;SOD2;SOX9;TBX3;HNF1B;TNF;TNFAIP3;UCP2;XBP1;SLC7A5;ARID5B;CFLAR;ALDH1A2;CLDN1	4.53741	5.23e-12
GOBP_CELLULAR_RESPONSE_TO_KETONE	KLF2;POSTN;PARK7;FBXO32;CYP1B1;AHR;EIF4E;FOXO3;FOS;GAS6;GJB2;DCPS;AR;MSN;ATP2B1;ATP5F1A;SERPINF1;PLAT;ERRFI1;DDIT4;PTGER2;RPLP0;SCNN1A;SFRP1;SGK1;SOX10;SPP1;KLF9;NCOA4;AKR1C3;CFLAR	5.49049	5.39e-12
GOBP_REGULATION_OF_RESPONSE_TO_OXIDATIVE_STRESS	RACK1;FBLN5;PARK7;NCOA7;CTNNB1;ENDOG;STOX1;FOXO3;GATA4;GCH1;H19;HIF1A;HSPB1;IL10;MCL1;MET;NFE2L2;DDR2;P4HB;PAWR;PPIA;OXR1;SFPQ;SOD1;SOD2;TNF;TXN;NR4A3;NME5;CD36;PAGE4	5.49049	5.39e-12
GOBP_POSITIVE_REGULATION_OF_IMMUNE_EFFECTOR_PROCESS	SPON2;PHB2;NLRP3;CD55;FCN1;FGR;ZBTB1;CADM1;GATA2;PYCARD;ANXA1;HLA-A;HLA-B;HLA-DMB;HLA-DRA;HLA-DRB1;HLA-E;HSPD1;IL1B;IL1R1;IL10;IL18;ITGAM;ITGB2;CD46;DNAJB9;MIF;CFP;PLA2G5;B2M;PTPRC;NECTIN2;RAC2;RPS19;NFKBIZ;CLEC7A;SPI1;STXBP2;TFRC;TGFB1;TNF;C3;TYROBP;XBP1;LAPTM5;NR4A3;SLC7A5;NFKBID;VAMP8;DDX21;CD36;CD74;CD81	3.32057	5.54e-12
GOBP_REGULATION_OF_BLOOD_CIRCULATION	AKAP9;CELF2;CHGA;CLIC2;ADM;CCN2;ADRA2A;ADRA2C;CXADR;DES;DSG2;DSP;AGTR2;EDN1;EDNRA;EDNRB;FLNA;GATA4;GCH1;GJA1;GJA5;RANGRF;HSP90AA1;JUP;KCNE1;RHOA;LEP;MDM2;MMP2;ATP1A1;ATP1B1;ATP2A2;ATP2B1;PDE4B;PKP2;FXYD1;PTGS2;RGS2;RGS4;S100A1;SLC1A1;SRI;STC1;TBXAS1;TNF;TPM1;SUMO1;YWHAE;IRX3;DOCK5;CALM1;CALM2;CAV1	3.32057	5.54e-12
GOBP_RESPONSE_TO_INSULIN	NAMPT;SORBS1;RAB31;TWIST2;COL1A1;ADM;CTSK;EGR1;FOXO1;FOS;GCNT1;DNAI1;GCLC;GNAI2;TRARG1;GRB2;SLC2A8;IGFBP1;APRT;IL1B;IL10;INSIG1;INSR;LEP;LPL;NCL;ATP2B1;PDK4;PIK3R1;PKM;ERRFI1;VPS13C;SELENOS;PTPN1;PTPRE;RAB13;RARRES2;RBM4;SRSF5;ZNF106;NUCKS1;SLC2A1;SORL1;ZFP36L1;TLR2;UCP2;XBP1;CAT;IRS2;TNFSF10;CFLAR;SOCS3;SYAP1;ZNF592	3.27459	5.57e-12
GOBP_NEGATIVE_REGULATION_OF_MAPK_CASCADE	HIPK3;SPRY1;TNIP1;IRAK3;CNKSR3;DAB2;DUSP1;DUSP2;DUSP6;EFNA1;MECOM;FBLN1;FOXO1;GBP1;PDCD4;RNF149;GPS2;GSTP1;HMGCR;PRMT1;DNAJA1;APOE;IL1B;LIF;MYC;ATF3;PEBP1;TAOK3;PER1;ERRFI1;PPIA;NDRG2;PTPN1;PTPRC;RGS2;SFRP1;SFRP2;SORL1;TIMP3;EZR;CAV1;SLC9A3R1	3.99741	6.24e-12
GOBP_NEURAL_NUCLEUS_DEVELOPMENT	BASP1;YWHAQ;CKB;COX6B1;ARX;ALDH1A3;HSPA5;KCNE1;RHOA;MBP;NFIB;ATP5PB;ATP5PF;PLP1;NDRG2;BCL2;ACTB;S100A1;YWHAE;YWHAH;CALM1;CALM2;DYNLL1;CDC42	7.66076	6.36e-12
GOBP_REGULATION_OF_MORPHOGENESIS_OF_AN_EPITHELIUM	PHB2;CTNNB1;AGTR2;ESR1;STOX1;FGF7;SULF1;GJA1;HOXB7;AR;ITGAX;LIF;TACSTD2;MDK;WNT4;LGR4;NTN4;SFRP1;SNAI2;SOX9;TNF;VEGFA;WNT2;PAX8	7.66076	6.36e-12
GOBP_SKELETAL_SYSTEM_MORPHOGENESIS	CITED2;OSR2;COL1A1;COL3A1;COL11A1;OSR1;COMP;CCN2;CTNNB1;PHOSPHO1;DLX5;FGR;TIPARP;ANKRD11;HOXB5;HOXB6;HOXB7;IHH;INSIG1;LTF;MGP;MMP2;MMP14;MSX1;MSX2;PDGFRA;PRRX1;POR;IFT80;PLEKHA1;SFRP1;SFRP4;CSRNP1;BMPR1B;SOX9;STC1;ZEB1;TWIST1;ZFAND5;ATG9A;SPEF2;FUZ;ARID5B;TMEM107;COL27A1;SERPINH1;DHRS3;EIF4A3	3.56506	6.52e-12
GOBP_MAINTENANCE_OF_LOCATION_IN_CELL	AKAP9;KDELR1;KDELR2;CORO1A;PARK7;CLIC2;CYBA;PTK2B;FKBP1A;FLNA;SYNE1;SUN1;ARL2BP;FTH1;FTL;NR5A1;ANK3;GSN;HNRNPU;HSPA5;APOE;INSIG1;LCN2;CHCHD10;ARL2;VPS13C;SRGN;CCDC88A;TWF1;PTPRC;S100A8;S100A9;CCL3;CCL21;SKP1;SORL1;SRI;TSPO;THY1;TMSB4X;HSP90B1;TXN;SLC30A2;CALM1;CALM2;CALR;CAV1;TMSB10	3.56506	6.52e-12
GOBP_REGULATION_OF_PROTEIN_LOCALIZATION_TO_CELL_PERIPHERY	RACK1;LYPLA1;CIB1;AGR2;SORBS1;AP2M1;LRRC15;DAB2;EPHA2;EPB41L2;ACSL3;GBP1;RANGRF;AR;ITGA3;ITGB1;KIF5B;LGALS3;LRP1;MMP14;PIK3R1;LZTFL1;PPP2R5A;RAP1A;ACTB;SPTBN1;TGFB1;TNF;EZR;NUMB;VAMP8;SQSTM1;PKDCC;TMEM59	4.89969	6.7e-12
GOBP_RIBOSOME_ASSEMBLY	DDX3X;NOP53;RPSA;NPM1;RPS27L;MRPS2;SBDS;NGRN;MRPL20;RPL5;RPL6;RPL10;RPL11;RPL23A;RPL24;RPL38;RPLP0;RPS5;RPS14;RPS15;RPS19;RPS27;RPS28	8.13349	7.02e-12
GOBP_POSITIVE_REGULATION_OF_EXTRINSIC_APOPTOTIC_SIGNALING_PATHWAY	CTNNA1;AGTR2;PYCARD;PDIA3;ATF3;G0S2;TNFRSF12A;PMAIP1;PPP1CA;PTPRC;BID;SFRP1;SKIL;BMPR1B;STK4;THBS1;TIMP3;TNF;SRPX;CAV1;TNFSF10	9.47083	7.08e-12
GOBP_NEURAL_TUBE_FORMATION	CITED2;SPINT2;TMED2;CTHRC1;ADM;CLUAP1;COBL;FOLR1;PLXNB2;IFT172;HIF1A;LRP2;PFN1;IFT57;PTCH1;CC2D2A;SHROOM3;BRD2;RPS7;SDC4;SFRP1;SFRP2;PHACTR4;SOX4;SPINT1;STK4;TGFB1;TWIST1;VASP;TCTN1;FUZ	5.41718	7.09e-12
GOBP_NEGATIVE_REGULATION_OF_CELL_GROWTH	CDKN1A;RACK1;SEMA6B;SEMA3C;CCDC85B;DCBLD2;CRYAB;DAB2;DDX3X;AGTR2;ENO1;PI16;GJA1;HSPA1A;HSPA1B;IFRD1;MSX1;NDUFA13;PPT1;MEG3;SEMA3G;RTN4;PTPRS;RBBP7;BCL2;RGS2;RGS4;TSPYL2;SFRP1;SFRP2;SOX17;SLIT3;SPP1;BST2;BTG1;TGFB1;SEMA3B;RERG;NRP1;SEMA5A;SPAG9;SCGB3A1;CDH1	3.89482	7.14e-12
GOBP_NEGATIVE_REGULATION_OF_PROTEIN_LOCALIZATION	LYPLA1;ERP29;CHGA;PKIG;PARK7;AP2M1;LRRC15;CTNNA1;ADRA2A;DAB2;FOXO1;SVIP;TMEM98;GBP1;TAX1BP3;HMGCR;DNAJA1;APOD;APOE;IL1B;INSIG1;KCNE1;LMAN1;PIM3;PFKL;LZTFL1;LEPROT;PPP2R5A;VPS35;SFRP1;SPI1;BTF3;TGFB1;TXN;SUMO1;UCP2;RAB11FIP1;NUMB;SNX3;MIDN;DERL3;PKDCC;CD36;TMEM59;BAG3	3.74211	7.39e-12
GOBP_NEPHRON_DEVELOPMENT	CD24;BASP1;OSR1;CTNNB1;JAG1;AGTR2;EDNRA;EDNRB;EGR1;FOXJ1;SULF1;GPC3;SEC61A1;HOXB7;HES1;ILK;ITGA3;LAMA5;LIF;TACSTD2;MYC;NID1;PBX1;PDGFRA;PODXL;WNT4;AHI1;LGR4;PTCH1;ACTA2;BCL2;SOX9;HNF1B;VEGFA;PAX8;IRX3;CFLAR;PROM1	4.33652	8.31e-12
GOBP_RESPONSE_TO_COPPER_ION	PARK7;DAXX;IL1A;MT1E;MT1F;MT1G;MT1H;MT1M;MT1X;MT2A;MT-CO1;NFE2L2;PAM;ATP5F1D;SOD1;SOD3;SORD;TFRC;MAP1LC3A	11.2892	8.39e-12
GOBP_POSITIVE_REGULATION_OF_RESPONSE_TO_WOUNDING	FERMT2;CLDN4;CLDN3;ADRA2A;F3;ENPP4;FLNA;GRN;ANXA1;ITGB1;MDK;NFE2L2;DDR2;SERPINE1;PLAT;PTN;CLEC7A;PRDX2;THBD;THBS1;ACTG1;XBP1;CXCR4;EMILIN2;CLDN1;CD36	6.67456	9.16e-12
GOBP_APOPTOTIC_MITOCHONDRIAL_CHANGES	PPIF;CLU;EYA2;FAM162A;PRELID1;GCLC;GCLM;SFN;SLC25A4;PYCARD;SLC25A5;SLC25A6;HSPA1A;HSPD1;IGF1;LMNA;CHCHD10;ARRB2;FIS1;PLAUR;PMAIP1;VPS35;BCL2;BID;SOD2;BNIP3L;VDAC2;GGCT;TNFSF10;PDCD5;ATP5IF1	5.34656	9.31e-12
GOBP_ORGANELLE_LOCALIZATION	CDH2;PDCD6IP;PDCD6;AP1M2;ACTR2;AKAP9;SPRY1;CFL1;NUDC;AHCYL1;TMED2;KIF3A;CHGA;RAB3IP;TRAPPC5;CTNNB1;GRAMD2A;STX2;MAPK15;FGR;SYNE2;SUN1;GATA2;ARFGAP3;BLOC1S1;GEM;GJA1;CHMP2A;PCDH17;TMEM230;CHMP4A;HIF1A;HNRNPU;HSBP1;ITGB1;KIF5B;KIF22;LLGL2;LMNA;MAP1B;MAP4;ASIP;MYO6;NPM1;ATP2A2;PCM1;CEP83;CHMP5;PLEK;TMED9;FNBP1L;CCDC186;ARL8B;CHMP1B;PTGDS;NECTIN2;TRAPPC1;RAB13;RAC2;RAN;RPS15;S100A13;BICD1;SDC4;SDCBP;…	2.3985	9.6e-12
GOBP_NEGATIVE_REGULATION_OF_WNT_SIGNALING_PATHWAY	CDH2;RACK1;RUVBL2;CTHRC1;APCDD1;CTNNB1;CTNND1;DAB2;TLE5;EGR1;DKK1;FOXO1;FOXO3;CBY1;GPC3;RBMS3;TAX1BP3;HIC1;APOE;IGFBP1;IGFBP2;IGFBP4;IGFBP6;LRP1;MDK;CCDC88C;PFDN5;IFT80;SFRP1;SFRP2;SFRP4;SOX17;SNAI2;SOX9;SOX10;STK4;BICC1;FUZ;CAV1;SLC9A3R1;RBX1	4.01778	9.63e-12
GOBP_SIGNAL_RELEASE	GIPC1;KDM5B;CHGA;PARK7;SLC16A10;ADM;CPE;SELENOM;ADRA2A;ADRA2C;DAB2;EDN1;EDNRB;STX2;ACSL4;FOXO1;MPC2;PNKD;GJA1;SERP1;GLUL;ANXA1;HIF1A;HLA-DRB1;NR4A1;ICA1;IL1A;IL1B;IL1RN;LEP;LIF;PIM3;MIF;ATP2A2;OSM;PFKL;PFN2;SLC38A2;CCDC186;PPT1;VPS35;MAP2K6;PTGS2;RAP1A;RAP1B;RBM4;RFX3;CCL5;CXCL12;SFRP1;SCG5;NIBAN2;SLC16A1;SOX4;SPP1;SRI;STXBP2;TBX3;HNF1B;TSPO;TMF1;TNF;TRH;UCP2;SLC30A1;PAX8;WLS;RAB11FIP1;SLC44A4;LT…	2.57326	9.66e-12
GOBP_EPITHELIAL_CELL_APOPTOTIC_PROCESS	EDNRA;HIPK1;ESR1;FOXO3;GAS6;GATA2;NUPR1;PDCD4;H19;RGCC;GSN;ICAM1;IL10;KRT18;ARRB2;MDK;MAP3K5;NFE2L2;SERPINE1;CD248;BCL2;CCL2;BID;SFRP4;ZFP36L1;STK4;THBS1;TMF1;TNF;TNFAIP3;ZFP36;CAST;AKR1C3;CFLAR;SEMA5A;HAND2	4.54098	9.83e-12
GOBP_ENDODERM_DEVELOPMENT	COL4A2;COL5A1;COL5A2;COL6A1;COL8A1;COL11A1;COL12A1;CTNNB1;DUSP1;DUSP2;DKK1;ARC;FN1;GATA4;GATA6;GRB2;HSBP1;ITGA5;ITGB2;LAMB1;LAMB3;MMP2;MMP14;MAP2K1;SOX17;ZFP36L1;HNF1B	6.3137	9.97e-12
GOBP_NEGATIVE_REGULATION_OF_DNA_BINDING_TRANSCRIPTION_FACTOR_ACTIVITY	TRIB1;IRAK3;PHB2;NLRP3;CYP1B1;COMMD6;ESR1;FOXJ1;FLNA;GAS6;NUPR1;NWD1;PYCARD;ANXA4;HES1;ID1;ID2;ID3;IL10;IRAK1;IRAK2;ARRB2;MSX2;NFKBIA;PIM1;HES6;TCEAL7;PELI1;PTCH1;PTGIS;SFRP4;SPI1;SRI;PRDX2;TMSB4X;TNFAIP3;TWIST1;SUMO1;CAT;BHLHE40;TAX1BP1;KLF4;HAND2	3.84172	1.04e-11
GOBP_REGULATION_OF_CATION_TRANSMEMBRANE_TRANSPORT	MRLN;COX17;PPIF;AKAP9;CORO1A;PARK7;PHB2;ADCYAP1R1;CLIC2;SLC43A2;OSR1;ADRA2A;CTSS;CYBA;CNKSR3;DAPK1;EDN1;EDNRA;PTK2B;LRRC55;FKBP1A;FLNA;ARC;NIPSNAP2;GEM;GNB2;ANK3;RANGRF;ITGB1;KCNE1;C4orf3;NDUFA4;ATP1B1;ATP1B3;FXYD2;SHANK1;PDE4B;FXYD1;FXYD3;PLP1;FXYD5;RELN;BCL2;RGS2;RGS4;RRAD;CCL2;SRI;TMBIM6;THY1;TMSB4X;TWIST1;SUMO1;UTRN;VDAC1;YWHAE;YWHAH;SLC30A1;AHNAK;CALM1;CALM2;ACTN4;VMP1;CAV1;SESTD1;SLC9A3R1;H…	2.75845	1.06e-11
GOBP_PLATELET_AGGREGATION	MYL9;MYL12A;PDPN;CLIC1;COMP;CSRP1;FLNA;FN1;ALOX12;GNAS;HBB;HSPB1;IL6ST;ILK;F11R;PDGFRA;PLEK;PPIA;ACTB;TLN1;ACTG1;VCL;EMILIN2;ACTN1;CD9	6.96245	1.13e-11
GOBP_REGULATION_OF_MYELOID_CELL_DIFFERENTIATION	TRIB1;CEBPB;CIB1;CSF3R;CTNNB1;JAG1;EVI2B;PTK2B;FBN1;FOXO3;FOS;GATA2;HCLS1;HIF1A;HLA-DRB1;HMGB2;PRMT1;HSPA1A;HSPA1B;HSPA9;ID2;LIF;LTF;MEIS2;MITF;RHEX;MYC;NEDD9;NFKBIA;PIK3R1;P4HTM;B2M;CCL3;SFRP1;SPI1;ZFP36L1;STAT3;TGFB1;KLF10;TNF;TNFAIP6;TYROBP;ZFP36;ZBTB16;PRXL2A;CD74	3.61962	1.14e-11
GOBP_POSITIVE_REGULATION_OF_INTRACELLULAR_TRANSPORT	CIB1;EHD1;SLC51B;PLK3;DAB2;FLNA;GAS6;SFN;ANK3;ANXA2;HCLS1;HSP90AA1;HSP90AB1;IL1B;ITGAM;ITGB2;JUP;LEP;MSN;OAZ1;FIS1;PCM1;SH3GLB1;ERGIC3;PIK3R1;STX18;TOMM7;LEPROT;PTGS2;RHOU;RAC2;RAN;UBL5;SCP2;SORL1;TGFB1;UBE2D3;EZR;YWHAE;CEP290;PDCD5;BAG3;CD81;CDH1	3.75311	1.15e-11
GOBP_POSITIVE_REGULATION_OF_NF_KAPPAB_TRANSCRIPTION_FACTOR_ACTIVITY	CIB1;LAMTOR5;PRDX3;IRAK3;NLRP3;CARD16;CLU;MTPN;PYCARD;HSPA1A;HSPA1B;IL1B;IL18;IRAK1;IRAK2;AR;LTF;NPM1;PPIA;PSMA6;RPS3;S100A8;S100A9;S100A12;CLEC7A;STAT3;TFRC;TLR2;TNF;UBE2V1;CAT;CAV1;CFLAR;SPHK1;ARHGEF2;MTDH;RPS6KA5;CD36	4.26223	1.27e-11
GOBP_MESONEPHROS_DEVELOPMENT	SPRY1;BASP1;OSR2;OSR1;CTNNB1;AGTR2;FOXJ1;GPC3;HOXB7;HES1;ILK;ARG2;LAMA5;TACSTD2;EPCAM;SMAD5;MYC;PBX1;WNT4;LGR4;PTCH1;BCL2;SDC4;SFRP1;SOX9;HNF1B;VEGFA;ZBTB16;PAX8;CAT	5.45947	1.31e-11
GOBP_NEURON_APOPTOTIC_PROCESS	CEBPB;CORO1A;PARK7;CTNNB1;NQO1;AGTR2;ERBB3;PTK2B;FOXO3;TRIM2;GAPDH;FAM162A;NUPR1;GCLC;GCLM;GRN;HDGF;HIF1A;HSPA5;HSP90AB1;APOE;IL6ST;IL10;ITGAM;JUN;RHOA;ARRB2;MCL1;MDK;NR4A2;RETREG1;OXR1;PPT1;AXL;LGMN;CCND1;BCL2;ROCK1;CCL2;CCL3;BID;SET;SLC1A1;SOD1;SOD2;TMBIM6;TNF;TYROBP;BTG2;CPEB4;NRP1	3.32029	1.36e-11
GOBP_DEVELOPMENTAL_MATURATION	KLF2;CTNNB1;PHOSPHO1;DEFB1;EDN1;EDNRA;EDNRB;EREG;PTK2B;FOXO3;TUT4;MTCH1;CATSPERD;GATA2;ANG;HIF1A;HES1;IGF1;RBPJ;IHH;KCNE1;RHOA;LEP;LTF;MAP1B;MMP2;RHEX;MSX2;NFIA;NR4A2;PAEP;SHANK1;PFN1;PGR;PLXNB1;AXL;RELN;IFT80;NTN4;BCL2;RFX3;CCL21;CLEC7A;BNC1;SOX10;C3;VEGFA;YWHAZ;ZBTB16;WDR77;ROPN1L;ALDH1A2;CHRDL1;TRIP13;CD63;REC8;PTBP3	3.06238	1.44e-11
GOBP_SUPEROXIDE_METABOLIC_PROCESS	FBLN5;CYBA;CYBB;NQO1;EDN1;ALOX12;GCH1;GNAI2;H19;GSTP1;ITGAM;ITGB2;NCF2;NFE2L2;PRDX1;CLEC7A;SLC1A1;SOD1;SOD2;SOD3;PRDX2;TGFB1;TYROBP;CD36;SH3PXD2A	6.81724	1.6e-11
GOBP_POSITIVE_REGULATION_OF_MONONUCLEAR_CELL_MIGRATION	CXCL13;CORO1A;AIF1;PTK2B;GAS6;ABL2;PYCARD;HMGB1;RHOA;LGALS3;NEDD9;SERPINE1;LGMN;S100A14;SELENOK;CCL3;CCL4;CCL5;CCL20;CCL21;CXCL12;SPI1;TNF;CALR;CD47	6.81724	1.6e-11
GOBP_TEMPERATURE_HOMEOSTASIS	CEBPB;GADD45G;ADAMTS5;OMA1;ADRB3;DIO2;EDNRB;EGR1;ALDH1A1;FABP5;ACSL1;FOXO1;KDM6B;GJA1;GNAS;ID1;RBPJ;IL1A;IL1B;IL18;LAMA4;LCN2;LEP;LEPR;G0S2;LGR4;MAP2K6;PRLR;PTGER3;PTGS2;RHEB;SCD;STAT3;TNF;UCP2;VEGFA;CXCR4;CAV1;SQSTM1;CD36;ZNF516	3.92867	1.71e-11
GOBP_REGULATION_OF_ANIMAL_ORGAN_MORPHOGENESIS	SPRY1;CITED2;PHB2;CTHRC1;APCDD1;CTNNB1;DAB2;AGTR2;EDN1;STOX1;FGF7;DKK1;SULF1;SPEF1;GPC3;HOXB7;AR;RHOA;TACSTD2;MSX1;WNT4;AHI1;LGR4;RAC1;NTN4;SFRP1;SFRP2;SNAI2;SOX9;TNF;VEGFA;WNT2;PAX8;CDC42	4.69294	1.74e-11
GOBP_RESPONSE_TO_MONOSACCHARIDE	RACK1;TXNIP;COL6A2;CCN2;ADRA2A;CYBA;EGR1;ENDOG;ERN1;PTK2B;FOXO3;PLCB1;MPC2;ZBTB20;GAS6;GATA4;GCLC;GCLM;GLUL;HIF1A;HLA-DRB1;ICAM1;IL1A;RHOA;LEP;LPL;PIM3;SERPINF1;PFKL;CCDC186;SELENOS;PTGS2;RBM4;TRA2B;SOD2;SOX4;SRI;HNF1B;THBS1;TNF;UCP2;XBP1;CAT;IRS2;HMGN3	3.627	1.78e-11
GOBP_POSITIVE_REGULATION_OF_NERVOUS_SYSTEM_DEVELOPMENT	ACTR2;CRABP2;CTNNB1;CUX1;FN1;MACF1;PLXNB2;GOLGA4;HIF1A;HES1;ID2;ID4;IL1B;IL6ST;ITGB1;LIF;LRP2;CAPRIN1;MAP1B;MDK;MME;NAP1L1;SERPINF1;PLXNB1;PLXNB3;FAIM;MAP2K1;MAP2K2;RELN;PTN;SHTN1;RHEB;CXCL12;CLSTN2;SKIL;SOX10;SPINT1;TGFB1;TGM2;THBS2;TSPO;TLR2;TNF;TNFRSF1B;TP73;VEGFA;WNT2;CXCR4;METRN;SLC7A5;NUMB;NRP1;SEMA5A;DLG5	3.15754	1.8e-11
GOBP_MALE_SEX_DIFFERENTIATION	CITED2;PRDX4;CTNNA1;CTNNB1;CYP1B1;ESR1;NR5A1;GATA4;GATA6;NUPR1;HMGB2;HOXA10;IL1A;INSR;AR;KCNE1;LRP2;SMAD5;MMP14;NASP;PDGFRA;WNT4;LGR4;RAB13;PLEKHA1;CCND1;BCL2;SFRP1;SFRP2;SOX9;TBX3;TMF1;UBB;NCOA4;ARID5B;YBX3;AKR1C3;TNFSF10;EIF2S2;REC8	4.00855	1.81e-11
GOBP_NEURAL_CREST_CELL_DIFFERENTIATION	CDH2;PDCD6;CITED2;SEMA6B;SEMA3C;JAG1;EDN1;EDNRA;EDNRB;ENG;FN1;FOLR1;HIF1A;HES1;LAMA5;SEMA3G;RPS7;SFRP1;SNAI2;PHACTR4;SOX9;SOX10;TWIST1;SEMA3B;NRP1;ALDH1A2;SEMA5A;HAND2;CDC42	5.58657	1.83e-11
GOBP_RESPONSE_TO_VITAMIN	POSTN;COL1A1;FOLR1;KANK2;GAS6;GATA4;DCPS;IL1A;AQP3;LEP;MAP1B;MGMT;MN1;ATP2B1;PIM1;PTGS2;BCHE;CCND1;SFRP1;SNAI2;SOD2;SPP1;STC1;TSPO;CAT;ALDH1A2;KYNU	6.09637	1.87e-11
GOBP_ORGANIC_ANION_TRANSPORT	ARL6IP5;PDPN;GIPC1;SLC2A6;SLC16A10;SLC15A4;SLC25A29;SLC51B;SLC43A2;EMB;SLC26A2;EDN1;ARL6IP1;FOLR1;SERINC5;MPC2;GJA1;SLC25A4;SLC25A5;SLC25A6;SLC25A24;SLC2A8;ANXA1;IL1A;IL1B;AQP9;ITGB1;LEP;LRP2;MGST1;MIF;CYB5R1;PLA2G2A;PLA2G5;SLC38A2;SLC47A1;MAP2K6;PSAP;PTGS2;RGS2;RGS4;SLC39A8;SLC1A1;SLC1A7;SLC2A1;SLC2A3;SLC3A1;SLC3A2;SLC6A6;SLC6A8;SLC7A2;SLC11A1;SLC16A1;TNF;TRH;SLC44A4;SLC7A5;MFSD2A;KMO;ABCC3;SLC7…	2.78979	1.93e-11
GOBP_SMALL_GTPASE_MEDIATED_SIGNAL_TRANSDUCTION	WASF2;RASGRP2;SPRY1;CDKN1A;NET1;CDC42EP3;PDPN;CFL1;YWHAQ;AKAP13;PARK7;GABARAP;ADCYAP1R1;TAGAP;FGD4;COL1A2;COL3A1;ADRA2A;RASGEF1B;AIF1;EPS8;SPATA13;PSD3;CD2AP;KANK2;ABL2;GPR17;GRB2;RAPGEF1;RANGRF;TAX1BP3;IGF1;APOE;ITGA3;ITGB1;JUN;RHOA;RHOB;RHOC;RND3;STMN1;ARHGDIB;ARL3;MET;CCDC88C;NUCB2;F11R;LRRC59;CCDC88A;BRK1;RELN;CDC42SE2;HEG1;SHTN1;RHOU;RAC1;RAC2;RALGDS;RAP1A;RAP1B;RHEB;RIT1;ROCK1;RRAD;RRAS;SDC…	2.47351	2.13e-11
GOBP_NEGATIVE_REGULATION_OF_NEURON_DEATH	RACK1;GPNMB;CEBPB;CHGA;CORO1A;PARK7;NCOA7;CTNNB1;ERBB3;PTK2B;GCLC;GCLM;GRN;CHMP4A;HDGF;HIF1A;HSP90AB1;APOE;IL6ST;IL10;JUN;RHOA;ARRB2;MDK;NR4A2;SERPINF1;RETREG1;OXR1;PPT1;VPS35;AXL;LGMN;CCND1;BCL2;ROCK1;CCL2;SET;SLC1A1;SOD1;SOD2;SORL1;TNFRSF1B;BTG2;NR4A3;CPEB4;NRP1	3.5346	2.23e-11
GOBP_POSITIVE_REGULATION_OF_PHAGOCYTOSIS	LMAN2;RAB31;CYBA;FCER1G;FCN1;GAS6;GATA2;PYCARD;IL1B;MFGE8;CFP;PLA2G5;PTPRC;PTX3;CCL2;CLEC7A;SLC11A1;SOD1;TNF;C3;C4A;C4B;CALR;CD36;CD47	6.67795	2.26e-11
GOBP_RESPONSE_TO_FATTY_ACID	CCN2;EDN1;ACSL1;FOXO1;FOXO3;PLCB1;HES1;ID3;LDLR;LPL;MBP;PDK4;PLAT;PTGS2;SCD;SOX9;TBXAS1;TLR2;UCP2;CAT;AKR1C3;CLDN1;CD36	7.52282	2.29e-11
GOBP_POSITIVE_REGULATION_OF_INTRINSIC_APOPTOTIC_SIGNALING_PATHWAY	RACK1;PARK7;EIF5A;NUPR1;MCL1;MSX1;MYC;FIS1;PMAIP1;IL20RA;RPL11;RPL26;RPS3;RPS7;S100A8;S100A9;BID;SFPQ;SKIL;SOD1;UBB;CAV1;SLC9A3R1	7.52282	2.29e-11
GOBP_NEGATIVE_REGULATION_OF_BINDING	MRLN;CDKN1A;STUB1;RACK1;PARK7;CARD16;EFHB;CTSZ;ADRB3;DAB2;TLE5;C9orf72;DKK1;ID1;IFI16;IL10;JUN;C4orf3;LRPAP1;ARRB2;MSX1;MSX2;NFKBIA;ATP2A2;ZNF593;PPP1CA;B2M;PTPRF;ACTB;ROCK1;SLPI;SORL1;SRI;TMBIM6;TMSB4X;SUMO1;CAV1;HAND2;EIF4A3	4.06254	2.29e-11
GOBP_SMOOTHENED_SIGNALING_PATHWAY	RACK1;IFT27;CTNNA1;IQUB;DZIP1L;HIPK1;CLUAP1;RPGRIP1L;IFT172;GAS1;GAS8;B9D1;INTU;GPC3;IFT81;HES1;IHH;ARL3;SEPTIN2;DCDC2;HSPB11;PRRX1;POR;IFT57;PTCH1;CC2D2A;IFT80;SFRP1;TMEM231;TCTN1;DYNC2H1;TTC21B;TTC26;FUZ;RAB34;DLG5	4.37244	2.37e-11
GOBP_POSITIVE_REGULATION_OF_SIGNAL_TRANSDUCTION_BY_P53_CLASS_MEDIATOR	HEXIM1;DDX5;EIF5A;HIC1;MSX1;MYC;PMAIP1;RPL11;RPL26;RPL37;RPS7;RPS15;RPS20;UBB;RPL23;EEF1E1	14.9294	2.45e-11
GOBP_REGULATION_OF_OXIDATIVE_STRESS_INDUCED_CELL_DEATH	RACK1;PARK7;NCOA7;CTNNB1;ENDOG;FOXO3;GATA4;HIF1A;HSPB1;IL10;MCL1;MET;NFE2L2;DDR2;P4HB;PAWR;PPIA;OXR1;SFPQ;SOD1;SOD2;TNF;TXN;NR4A3;NME5;PAGE4	6.3033	2.46e-11
GOBP_REGULATION_OF_LYMPHOCYTE_DIFFERENTIATION	LILRB2;FGL2;NLRP3;EGR3;ZBTB1;FOXJ1;FOXO3;XRCC6;GAS6;PRELID1;ANXA1;HLA-DRA;HLA-DRB1;HMGB1;ID2;IHH;IL7R;IL10;IL18;IRF1;JUNB;RHOA;CD46;MDK;MMP14;PNP;AXL;PTPRC;ACTB;PRDM1;VSIR;SFRP1;NFKBIZ;SMARCE1;SOD1;SOX4;ZFP36L1;ZFP36L2;ZEB1;PRDX2;XBP1;ZBTB16;NFKBID;CD83;CD74	3.58285	2.5e-11
GOBP_MYELOID_LEUKOCYTE_DIFFERENTIATION	TRIB1;CITED2;CEBPB;CSF1R;CTNNB1;GPR183;EPHA2;EVI2B;FBN1;FOS;GATA2;GPC3;ANXA2;HCLS1;HLA-DRB1;ID2;IFI16;RBPJ;ITGB8;JUN;JUNB;LIF;LTF;MITF;MT1G;MYC;NEDD9;PIK3R1;CCL3;SFRP1;SPI1;ZFP36L1;TFRC;TGFB1;KLF10;TLR2;TNF;TNFAIP6;TYROBP;VEGFA;PRXL2A;PIR;SH3PXD2A;CD74;CD81;CDC42	3.51396	2.64e-11
GOBP_GLIAL_CELL_DIFFERENTIATION	CDH2;CLU;CTNNB1;ERBB3;TMEM98;PHGDH;GPR17;GRN;HES1;ID2;ID4;IFNGR1;IL1B;IL6ST;ILK;ITGB4;RHOA;LDLR;LIF;LRP1;MDK;NFIB;PLP1;MXRA8;MAP2K1;RELN;PTN;RHEB;S100A8;S100A9;SOD1;SOX4;SOX9;SOX10;SPINT1;STAT3;TGFB1;TLR2;TNF;TNFRSF1B;TP73;C5AR1;VIM;CXCR4;METRN;TTC21B;PLPP3	3.45048	2.75e-11
GOBP_MITOCHONDRIAL_TRANSPORT	TOMM6;PPIF;MTX2;ROMO1;EYA2;SAMM50;TIMM13;TIMM8B;GCLC;SLC25A4;DNAJC15;SLC25A5;SLC25A6;SLC25A24;HSPA1A;HSP90AA1;HSPD1;LMAN1;CHCHD10;TOMM5;FIS1;NDUFA13;SH3GLB1;TMEM14C;PMAIP1;TOMM7;LEPROT;VPS35;RHOU;RAC2;UBL5;BCL2;BID;BNIP3L;TSPO;UBE2D3;UCP2;VDAC2;ALKBH7;PDCD5;ATP5IF1;BAG3	3.77705	2.79e-11
GOBP_REGULATION_OF_PEPTIDYL_TYROSINE_PHOSPHORYLATION	CD24;RACK1;CSF1R;ADRA2A;EFNA1;ERBB3;EREG;PTK2B;FGF7;ARL2BP;GAS6;HCLS1;HES1;IGF1;IL6ST;IL18;ITGA5;ITGB2;AREG;LEP;LIF;ARRB2;MIF;NCL;NEDD9;OSM;ENPP2;ERRFI1;PARP14;RELN;PTPN1;PTPRC;CCL5;SAMSN1;SFRP1;SFRP2;TGFB1;THY1;TNF;TNFRSF1A;VEGFA;CAV1;PLPP3;NRP1;SOCS3;GPRC5A;ARHGEF2;CD36;CD44;ZNF592;CD74;CD81	3.19566	2.88e-11
GOBP_ERYTHROCYTE_HOMEOSTASIS	KLF2;CITED2;ALAS2;FOXO3;GATA2;SLC25A5;HCLS1;HIF1A;HMGB2;HOXB6;PRMT1;HSPA1A;HSPA1B;HSPA9;ID2;SMAD5;RHEX;PRDX1;TMEM14C;P4HTM;AXL;KMT2E;B2M;RPS6;RPS14;RPS17;RPS19;RPS24;SPI1;ZFP36L1;STAT3;VEGFA;ZFP36;ATP5IF1;PTBP3	4.45639	2.89e-11
GOBP_NIK_NF_KAPPAB_SIGNALING	CHI3L1;PHB2;NLRP3;DDX3X;EDN1;PDCD4;BIRC3;IL1B;IL18;ILK;IRAK1;RHOA;LIMS1;NDUFC2;NFKB2;NFKBIA;PRDX1;TRIM44;C20orf27;UACA;TCIM;REL;RPS3;SPI1;TLR2;TSPAN6;TMSB4X;TNF;EZR;LAPTM5;ACTN4;CALR;TNFRSF10B;SPHK1;CD14;LITAF	4.33224	2.94e-11
GOBP_POSITIVE_REGULATION_OF_T_CELL_PROLIFERATION	CD24;LILRB2;CORO1A;CD55;AIF1;PYCARD;ANXA1;HLA-A;HLA-DMB;HLA-DPA1;HLA-DPB1;HLA-E;HMGB1;HES1;IGF1;IGFBP2;IL1A;IL1B;IL6ST;IL18;LEP;CD46;PNP;PTPRC;SELENOK;RPS3;CCL5;TFRC;VCAM1;CD81	5.24064	2.95e-11
GOBP_REGULATION_OF_COAGULATION	PROCR;EDN1;F3;ENPP4;ALOX12;ANXA2;ANXA5;APOE;NFE2L2;SERPINE1;SERPINB2;PDGFRA;PLAT;PLAUR;PRDX2;TFPI;THBD;THBS1;SERPING1;TSPAN8;VKORC1;EMILIN2;CAV1;CD9;CD36	6.54424	3.16e-11
GOBP_REGULATION_OF_MUSCLE_CONTRACTION	AKAP9;MYL9;CHGA;C12orf57;CLIC2;CNN1;CCN2;ADRA2A;ADRA2C;DSG2;DSP;EDN1;CTTN;ENO1;GATA4;GJA5;RANGRF;NR4A1;HSP90AA1;JUP;RHOA;ATP1A1;ATP1B1;ATP2A2;ATP2B1;PDE4B;PKP2;PTGS2;RGS2;SCN4A;SOD1;SRI;STC1;TPM1;SUMO1;DOCK5;CALM1;CALM2;CAV1;SPHK1	3.91769	3.21e-11
GOBP_RESPIRATORY_BURST	CD24;CD52;CYBA;CYBB;CD55;GRN;HCK;IGHA1;IGHA2;INSR;NCF2;SELENOK;RAC1;RAC2;RPS19;CLEC7A;SLC11A1;PRDX2	11.201	3.24e-11
GOBP_AMYLOID_BETA_CLEARANCE	CLU;HMGCR;IFNGR1;APOE;INSR;ITGAM;ITGB2;LDLR;LRP1;LRP2;LRPAP1;MME;ROCK1;TNF;C3;C5AR1;RAB11A;CD36	11.201	3.24e-11
GOBP_REGULATION_OF_CELL_MATRIX_ADHESION	CIB1;FERMT2;COL16A1;JAG1;PTK2B;MACF1;EFEMP2;APOD;JUP;RHOA;LIMS1;MMP14;SERPINE1;PIK3R1;WNT4;RAC1;BCL2;ROCK1;RRAS;S100A10;CCL21;SDC4;SFRP1;THBS1;THY1;TLN1;ACTG1;UTRN;VCL;VEGFA;DDR1;NRP1;CD36	4.70226	3.28e-11
GOBP_CALCIUM_ION_TRANSPORT	MRLN;RAMP1;LILRB2;CORO1A;ADCYAP1R1;CLIC2;TMEM37;CCN2;CTNNB1;ADRA2A;EFHB;CYBA;EDN1;EDNRA;EDNRB;GRAMD2A;PTK2B;FKBP1A;FLNA;GAS6;NIPSNAP2;GEM;GNAI2;SEC61A1;ANXA2;HES1;KCNE1;RHOA;LGALS3;C4orf3;ARRB2;ATP1B1;ATP2A2;ATP2B1;PDE4B;SARAF;PLP1;TMEM165;PTGS2;PTPRC;SELENOK;BCL2;RGS4;RRAD;CCL2;CCL3;CCL4;CCL5;CCL21;CXCL12;SLC3A2;SRI;STC1;TMBIM6;TSPO;THY1;TPT1;SUMO1;VDAC1;YWHAE;SLC30A1;CXCR4;AHNAK;CALM1;CALM2;VMP…	2.58018	3.89e-11
GOBP_SUBSTANTIA_NIGRA_DEVELOPMENT	BASP1;YWHAQ;CKB;COX6B1;HSPA5;RHOA;MBP;ATP5PB;ATP5PF;PLP1;NDRG2;ACTB;S100A1;YWHAE;YWHAH;CALM1;CALM2;DYNLL1;CDC42	9.93418	3.92e-11
GOBP_NEGATIVE_REGULATION_OF_SUPRAMOLECULAR_FIBER_ORGANIZATION	WASF2;PFDN6;CIB1;TRIOBP;CORO1A;CLU;ADD3;PLEKHH2;MTPN;CRYAB;EPS8;SPEF1;GSN;HSPA8;APOE;STMN1;LDLR;TACSTD2;MAP1B;MET;F11R;SHANK1;LIMA1;PFDN5;PFN1;PFN2;PIK3R1;TWF1;SPTBN1;SPTBN2;TJP1;TMSB4X;WAS;CAPZA2;RHPN2;MYADM;TMSB10;ARHGEF2;GMFG	3.96788	4.11e-11
GOBP_ANTIMICROBIAL_HUMORAL_RESPONSE	WFDC2;SPON2;CXCL13;GNLY;ROMO1;DEFB1;FAU;GAPDH;GATA6;ANG;IGKV3-20;CXCL1;CXCL2;CXCL3;HLA-A;HLA-E;HMGN2;IGHA1;IGHA2;IGHM;CXCL8;LTF;LYZ;RARRES2;RNASE6;RPL30;RPL39;RPS19;S100A9;S100A12;SLC11A1;SLPI;CXCL14	4.65159	4.14e-11
GOBP_REGULATION_OF_RESPONSE_TO_ENDOPLASMIC_RETICULUM_STRESS	PIGBOS1;RACK1;AGR2;ERP29;PARK7;CLU;ERN1;PPP1R15A;SVIP;NUPR1;HSPA1A;HSPA5;DNAJB9;NFE2L2;UBXN1;PIK3R1;PMAIP1;SELENOS;PTPN1;TMBIM6;XBP1;MANF;PPP1R15B;CAV1;EIF2AK3;HERPUD1	6.07865	4.6e-11
GOBP_PROTEIN_REFOLDING	HSPB6;CRYAB;FKBP1A;DNAJA1;HSPA1A;HSPA1B;HSPA5;HSPA6;HSPA8;HSPA9;HSPB1;HSP90AA1;HSPD1;DNAJA4;B2M	16.3215	4.74e-11
GOBP_NEGATIVE_REGULATION_OF_CYTOKINE_PRODUCTION	CD24;KLF2;GPNMB;IRAK3;NLRP3;CARD16;EPHA2;SERPINB1;FOXJ1;FN1;CD2AP;TRAF3IP1;GAS6;GATA6;GBP1;PDCD4;RGCC;PYCARD;GSTP1;ANXA1;ANXA4;HLA-DRB1;HMGB1;HSP90AB1;APOD;IGF1;IL10;IDO1;ARG2;LTF;ARRB2;NFKB1;ATP2B1;ERRFI1;LAPTM4B;LGR4;SRGN;AXL;SELENOS;NDRG2;PTPRC;PTPRS;RAC1;REL;VSIR;SLC11A1;BST2;TGFB1;THBS1;TSPO;TMSB4X;TNF;TNFAIP3;TWIST1;TYROBP;EZR;ZFP36;LAPTM5;IL1R2;BANF1;RPS6KA5;CD83;KLF4;HOMER2	2.74603	4.82e-11
GOBP_REGULATION_OF_HEART_CONTRACTION	AKAP9;CELF2;CHGA;CLIC2;ADM;CCN2;CXADR;DES;DSG2;DSP;AGTR2;EDN1;EDNRA;EDNRB;FLNA;GATA4;GCH1;GJA1;GJA5;RANGRF;HSP90AA1;JUP;KCNE1;MDM2;ATP1A1;ATP1B1;ATP2A2;ATP2B1;PDE4B;PKP2;FXYD1;RGS2;RGS4;S100A1;SLC1A1;SRI;STC1;TNF;TPM1;SUMO1;YWHAE;IRX3;CALM1;CALM2;CAV1	3.49771	4.87e-11
GOBP_NEGATIVE_REGULATION_OF_CANONICAL_WNT_SIGNALING_PATHWAY	CDH2;RUVBL2;CTHRC1;CTNNB1;CTNND1;DAB2;TLE5;EGR1;DKK1;FOXO1;FOXO3;CBY1;GPC3;RBMS3;APOE;IGFBP1;IGFBP2;IGFBP4;IGFBP6;MDK;CCDC88C;PFDN5;SFRP1;SFRP2;SFRP4;SOX17;SNAI2;SOX9;SOX10;STK4;BICC1;FUZ;CAV1;SLC9A3R1;RBX1	4.33001	5.53e-11
GOBP_MACROPHAGE_MIGRATION	CSF1R;DDT;EDNRB;PTK2B;B4GALT1;LGALS3;MDK;MIF;MMP2;MMP14;CKLF;RARRES2;SAA1;CCL2;CCL3;CCL5;THBS1;C3AR1;C5AR1;TRIM55;CD9;CD81	7.57238	5.61e-11
GOBP_NEGATIVE_REGULATION_OF_EPITHELIAL_CELL_PROLIFERATION	CDKN1C;PHB2;DAB2;EREG;SULF1;IFT172;NUPR1;B4GALT1;INTU;GPC3;SFN;RGCC;APOE;IRF6;AR;NFIB;ATP5F1A;SERPINF1;IFT57;B2M;PTCH1;IFT80;CCL2;SFRP1;SFRP2;SNAI2;SOX9;SPARC;STK4;KLF9;ZEB1;NR2F2;TGFB1;THBS1;TNF;WDR77;IFT74;CAV1;AIMP1;ATP5IF1	3.83176	5.62e-11
GOBP_REGULATION_OF_NIK_NF_KAPPAB_SIGNALING	PHB2;NLRP3;DDX3X;EDN1;PDCD4;IL1B;IL18;ILK;IRAK1;RHOA;LIMS1;NDUFC2;NFKBIA;PRDX1;TRIM44;C20orf27;UACA;TCIM;RPS3;SPI1;TLR2;TSPAN6;TMSB4X;TNF;EZR;LAPTM5;ACTN4;CALR;SPHK1;CD14;LITAF	4.89413	5.62e-11
GOBP_REGULATION_OF_EPITHELIAL_CELL_APOPTOTIC_PROCESS	ESR1;FOXO3;GAS6;GATA2;NUPR1;PDCD4;H19;RGCC;GSN;ICAM1;IL10;ARRB2;MDK;NFE2L2;SERPINE1;CD248;BCL2;CCL2;SFRP4;ZFP36L1;STK4;THBS1;TMF1;TNF;TNFAIP3;ZFP36;CAST;AKR1C3;CFLAR;SEMA5A;HAND2	4.89413	5.62e-11
GOBP_NEGATIVE_REGULATION_OF_DEFENSE_RESPONSE	FGL2;IRAK3;NLRP3;A2M;FGR;SAMHD1;TRAF3IP1;GPR17;GPS2;GRN;GSTP1;HCK;HLA-A;HLA-B;HLA-DRB1;AOAH;HLA-E;IFI16;IGF1;APOE;IL10;ARG2;LDLR;ARRB2;MDK;NFKB1;NT5E;PCBP2;SERPINF1;SERPINB9;PARP14;VPS35;SELENOS;HTRA1;MMP26;PSMA1;PTGIS;PTPRC;RPS19;SAA1;SEC14L1;SOD1;SERPING1;TSPAN6;TNFAIP3;TNFAIP6;TNFRSF1A;TNFRSF1B;ZFP36;BANF1;SOCS3;KLF4	3.12231	5.9e-11
GOBP_PEPTIDE_ANTIGEN_ASSEMBLY_WITH_MHC_PROTEIN_COMPLEX	PDIA3;HLA-DMA;HLA-DMB;HLA-DPA1;HLA-DPB1;HLA-DQA1;HLA-DQA2;HLA-DQB1;HLA-DRA;HLA-DRB1;HLA-DRB5;B2M;CALR	24.2519	5.92e-11
GOBP_POSITIVE_REGULATION_OF_PROTEIN_SERINE_THREONINE_KINASE_ACTIVITY	CD24;CIB1;ERP29;FERMT2;AKAP13;CKS2;CSF1R;ADRA2A;NEK10;DDX3X;EDN1;ERN1;ACSL1;PTK2B;MAPRE3;DKK1;RGCC;HSP90AB1;IL1B;INSR;IRAK1;RHOA;LTF;MAP3K5;MIF;TAOK3;MAP2K1;MAP2K2;MAP2K6;TCIM;PTPN1;PTPRC;CCND1;RPS3;S100A12;BMPR1B;STK4;TGFB1;THBS1;TNF;TPD52L1;VEGFA;CALM1;CALM2;CCND2;SYAP1;DAZAP2	3.35631	6.07e-11
GOBP_REGULATION_OF_OSSIFICATION	OSR2;OSR1;COMP;PHOSPHO1;SGMS2;ECM1;PTK2B;DKK1;INTU;HIF1A;CCN1;RBPJ;LTF;MDK;MGP;ATP2B1;DDR2;PBX1;WNT4;SRGN;TENT5A;PTN;BCL2;CCL3;SFRP1;BMPR1B;SOX9;TGFB1;TWIST1;ZBTB16;PKDCC;DHRS3	4.71228	6.16e-11
GOBP_POSITIVE_REGULATION_OF_INTRACELLULAR_PROTEIN_TRANSPORT	CIB1;SLC51B;PLK3;FLNA;GAS6;SFN;ANK3;HCLS1;HSP90AA1;HSP90AB1;IL1B;ITGAM;ITGB2;JUP;LEP;OAZ1;FIS1;PCM1;SH3GLB1;ERGIC3;PIK3R1;TOMM7;LEPROT;PTGS2;RHOU;RAC2;RAN;UBL5;SORL1;TGFB1;UBE2D3;YWHAE;CEP290;PDCD5;BAG3;CD81;CDH1	4.07894	6.61e-11
GOBP_ANATOMICAL_STRUCTURE_MATURATION	KLF2;CTNNB1;PHOSPHO1;DEFB1;EDN1;EDNRA;EDNRB;EREG;PTK2B;FOXO3;TUT4;MTCH1;CATSPERD;GATA2;ANG;HIF1A;HES1;IGF1;RBPJ;IHH;KCNE1;RHOA;LEP;LTF;MMP2;RHEX;MSX2;NR4A2;PAEP;PGR;PLXNB1;AXL;IFT80;NTN4;BCL2;RFX3;CCL21;CLEC7A;BNC1;SOX10;C3;VEGFA;ZBTB16;WDR77;ROPN1L;ALDH1A2;TRIP13;REC8;PTBP3	3.23629	7.14e-11
GOBP_NEGATIVE_REGULATION_OF_KINASE_ACTIVITY	HIPK3;TRIB1;SPRY1;CDKN1A;CDKN1C;RACK1;HEXIM1;PRDX3;PKIG;IRAK3;PARK7;GADD45A;DUSP1;CHORDC1;PDCD4;SFN;PYCARD;GSTP1;HMGCR;HNRNPU;DNAJA1;HSPB1;APOE;IL1B;MLLT1;GADD45B;NPM1;DDR2;RTRAF;ERRFI1;PPIA;PPP2R5A;PRKAR1A;HEG1;PTPN1;PTPRC;RGS2;SFRP1;SFRP2;DEPTOR;SORL1;NR2F2;THY1;TNFAIP3;CAV1;IRS2;MIDN;GPRC5A	3.28532	7.15e-11
GOBP_REGULATION_OF_STRESS_ACTIVATED_PROTEIN_KINASE_SIGNALING_CASCADE	HIPK3;ARL6IP5;GADD45G;CCN2;GADD45A;DUSP1;MECOM;PTK2B;FOXO1;PLCB1;PDCD4;GPS2;PYCARD;GSTP1;HMGB1;PRMT1;DNAJA1;IGFBP6;IL1A;IL1B;LEP;MAP3K5;MYC;GADD45B;PRDX1;TAOK3;PER1;PPIA;ULK4;MAP2K1;MAP2K2;CCL21;SDCBP;SFRP1;SFRP2;SPI1;TNF;TPD52L1;VEGFA;EZR;SPHK1;HAND2;PAGE4	3.57358	7.24e-11
GOBP_REGULATION_OF_UBIQUITIN_DEPENDENT_PROTEIN_CATABOLIC_PROCESS	TRIB1;STUB1;RACK1;GIPC1;PARK7;GABARAP;CLU;PLK3;DAB2;PTK2B;RYBP;HSPBP1;RNF144B;SVIP;ARIH1;RNF19A;GCLC;NOP53;HSPA1A;HSPA1B;HSP90AB1;MDM2;NFE2L2;UBXN1;RPL5;RPL11;RPS7;SDCBP;SUMO2;ELOB;SUMO1;LAPTM5;CAMLG;CAV1;EIF3H;ZFAND2A;RPL23;HERPUD1;RBX1	3.87661	7.25e-11
GOBP_POSITIVE_REGULATION_OF_TUMOR_NECROSIS_FACTOR_SUPERFAMILY_CYTOKINE_PRODUCTION	SPON2;CLU;CYBA;CYBB;DDT;LY96;ZBTB20;PYCARD;HLA-E;HMGB1;HSPB1;IFNGR1;IL1A;LEP;LPL;MIF;PIK3R1;PTPRC;SELENOK;CCL3;CLEC7A;STAT3;THBS1;TLR2;TWIST1;TYROBP;ARHGEF2;CD14;CD36;AKAP12	4.97492	8.23e-11
GOBP_REGULATION_OF_MITOCHONDRION_ORGANIZATION	PPIF;PARK7;OMA1;CLU;DCN;CTTN;ENDOG;STOX1;FAM162A;PRELID1;GCLC;SLC25A4;PYCARD;SLC25A5;SLC25A6;HIF1A;HSPA1A;IGF1;LMNA;CHCHD10;ARRB2;FIS1;PLAUR;PMAIP1;VPS13C;VPS35;BID;BNIP3L;SSBP1;TFRC;TSPO;VDAC1;TNFSF10;SQSTM1;PDCD5;ATP5IF1	4.14186	8.32e-11
GOBP_NEGATIVE_REGULATION_OF_CELL_CELL_ADHESION	LILRB2;GPNMB;CEBPB;SPINT2;FGL2;JAG1;FOXJ1;ALOX12;RGCC;ANXA1;HLA-DRB1;HMGB1;IHH;IL1RN;IL10;IDO1;IRF1;ARG2;LGALS3;EPCAM;MBP;MDK;PAWR;FXYD5;PODXL;PRKAR1A;PELI1;CCL21;SDC4;CXCL12;VSIR;SPI1;PRDX2;TGFB1;VEGFA;LAPTM5;AKNA;MYADM;DLG5;CD9;KLF4;CD74;CDH1	3.55101	8.57e-11
GOBP_NEGATIVE_REGULATION_OF_CELL_DEVELOPMENT	SEMA6B;SEMA3C;CTNNA1;CTNNB1;EDNRB;FBLN1;FBN1;TMEM98;GBP1;HES1;ID1;ID4;IFRD1;IGF1;IL1A;IL1B;LDLR;LTF;TACSTD2;MBP;PAEP;PCM1;B2M;SEMA3G;RTN4;PTN;PTPRS;SORL1;SOX10;SPP1;DYNLT1;TSPO;THY1;TNF;VEGFA;YWHAH;SEMA3B;ACTN4;NRP1;SEMA5A;CDH1	3.68608	8.88e-11
GOBP_COLUMNAR_CUBOIDAL_EPITHELIAL_CELL_DIFFERENTIATION	CDH2;CEBPB;AGR2;CTNNB1;JAG1;TUBB;SPDEF;GATA2;GATA4;GATA6;B9D1;HIF1A;HES1;IL6ST;MAP1B;NFIB;SERPINE1;PGR;WNT4;RBM4;RFX3;RHEB;PRDM1;SOX4;SOX9;KLF5;WDR77;TMEM231;CAV1;DLG5;KLF4	4.77875	9.12e-11
GOBP_CELLULAR_RESPONSE_TO_HEAT	PDCD6;DNAJB6;STUB1;DAXX;TFEC;CHORDC1;HSBP1;HSPA1A;HSPA1B;HSPA6;HSP90AA1;HSP90AB1;DNAJB1;IL1A;IRAK1;IER5;TCIM;PTGS2;RBBP7;THBS1;SUMO1;YWHAE;BAG3	6.83825	9.75e-11
GOBP_REGULATION_OF_TRANSPORTER_ACTIVITY	MRLN;COX17;PPIF;AKAP9;AHCYL1;PARK7;PHB2;CLIC2;OSR1;ADRA2A;CTSS;CNKSR3;DAPK1;EDN1;EDNRA;PTK2B;LRRC55;FKBP1A;ARC;NIPSNAP2;GEM;ANK3;RANGRF;ITGB1;KCNE1;C4orf3;NDUFA4;ATP1B1;ATP1B3;FXYD2;SHANK1;PDE4B;PIM1;FXYD1;FXYD3;FXYD5;RELN;BCL2;ACTB;RRAD;CCL2;SGK1;SLC5A3;SRI;TMSB4X;TWIST1;SUMO1;UTRN;YWHAE;YWHAH;AHNAK;CALM1;CALM2;ACTN4;VMP1;CAV1;SLC9A3R1;HOMER1	2.85887	9.76e-11
GOBP_FACE_DEVELOPMENT	COL1A1;DLX5;EDNRA;ALDH1A3;DKK1;TIPARP;ANKRD11;MMP2;MSX1;PDGFRA;MAP2K1;MAP2K2;PLEKHA1;RRAS;CSRNP1;ZFAND5;CRISPLD1;CRISPLD2;ARID5B;ALDH1A2	8.43462	1e-10
GOBP_REGULATION_OF_MORPHOGENESIS_OF_A_BRANCHING_STRUCTURE	PHB2;CTNNB1;AGTR2;ESR1;FGF7;SULF1;HOXB7;AR;TACSTD2;MDK;LGR4;RTN4;NTN4;SFRP1;SNAI2;SOX9;TNF;VEGFA;WNT2;PAX8	8.43462	1e-10
GOBP_EXTRACELLULAR_MATRIX_ASSEMBLY	FBLN5;COL1A2;COL3A1;GAS6;RGCC;EFEMP2;HAS1;IHH;LAMB1;LAMB3;MFAP4;MYH11;NTN4;SOX9;TGFB1;TNXB;PXDN;THSD4;ANTXR1	9.19816	1.01e-10
GOBP_REGULATION_OF_CELLULAR_RESPONSE_TO_TRANSFORMING_GROWTH_FACTOR_BETA_STIMULUS	SPRY1;STUB1;CDKN1C;CITED2;GIPC1;VASN;LRG1;DAB2;ENG;FBN1;FKBP1A;FOLR1;FAM89B;HSPA1A;HSPA5;HSP90AB1;ITGA3;LTBP1;ASPN;C20orf27;HTRA1;PMEPA1;SINHCAF;RBBP4;RBBP7;SDCBP;SKIL;ZEB1;TGFB1;TGFB1I1;THBS1;LTBP4;CAV1;CFLAR;NREP;ZEB2	4.10578	1.02e-10
GOBP_DNA_METABOLIC_PROCESS	ACTR2;CDKN1A;STUB1;CIB1;CETN2;PTGES3;RUVBL2;SUB1;MORF4L1;PARK7;SLC15A4;METTL23;CCN2;CTNNB1;ADRA2A;CYP1B1;MCMDC2;GADD45A;CENPX;ENDOG;EREG;EYA2;PTK2B;STOX1;LRWD1;MAPK15;ZBTB1;PDS5B;FOS;FUS;ZBTB38;XRCC6;PARM1;SAMHD1;REXO2;PAXX;RGCC;NOP53;ANXA3;HMGB1;HMGB2;HMGN1;HMGA1;HNRNPA1;HNRNPA2B1;HNRNPAB;HNRNPC;HNRNPU;APEX1;HSP90AA1;HSP90AB1;HSPD1;ID3;IL7R;IL10;ISG20;KIF22;GTF2H5;ARRB2;MGMT;MPG;MYC;NAP1L1;NASP;…	1.92102	1.04e-10
GOBP_REGULATION_OF_MAP_KINASE_ACTIVITY	CD24;HIPK3;TRIB1;SPRY1;ERP29;IRAK3;AKAP13;ADRA2A;NEK10;DUSP1;EDN1;ERN1;PTK2B;DKK1;PDCD4;GSTP1;HMGCR;DNAJA1;APOE;IL1B;INSR;IRAK1;MAP3K5;MIF;TAOK3;MAP2K6;PTPN1;PTPRC;RGS2;RPS3;S100A12;SFRP1;SFRP2;SORL1;TGFB1;THBS1;TNF;TNXB;TPD52L1;VEGFA;CAV1	3.66094	1.06e-10
GOBP_NEUROINFLAMMATORY_RESPONSE	CTSC;CLU;AIF1;NUPR1;GRN;IFNGR1;IGF1;IL1B;IL18;ITGAM;ITGB1;ITGB2;JUN;LDLR;LRP1;PTGS2;PTPRC;CCL3;TLR2;TNF;TNFRSF1B;C5AR1;TYROBP;SPHK1	6.40876	1.08e-10
GOBP_SYNAPSE_ORGANIZATION	CDH2;ACTR2;WASF2;LILRB2;PDLIM5;CFL1;SYNPO;COL4A1;CTNNB1;EFNA1;CTTN;TUBB;DKK1;FLNA;ARC;PLXNB2;NEGR1;ADGRF1;PCDH17;ANK3;HSPA8;APOE;IL10;IL10RA;INSR;ITGA3;ITGAM;ARF1;ARF4;RHOA;CHCHD10;CAPRIN1;MAP1B;NEDD9;NFIA;SHANK1;PFN1;PFN2;PLXNB1;VPS35;LGMN;RELN;PTPRF;PTPRS;ACTB;SDCBP;CLSTN2;SLC1A1;SPTBN2;STAU1;THBS2;TLR2;ACTG1;TNF;C3;C5AR1;YWHAZ;TUBA1A;CAST;SPARCL1;ACTN1;NRP1;IGFN1;CHRDL1;DLG5;HOMER1;MYOT;SPOCK2…	2.54879	1.13e-10
GOBP_NEURON_PROJECTION_REGENERATION	ADM;CTNNA1;FLNA;FOLR1;GRN;APOD;JUN;MAP1B;MMP2;OMG;PRRX1;MAP2K1;MAP2K2;PTN;PTPRF;PTPRS;BCL2;SPP1;TSPO;THY1;KLF4;NREP	7.19339	1.18e-10
GOBP_POSITIVE_REGULATION_OF_WOUND_HEALING	FERMT2;CLDN4;CLDN3;ADRA2A;F3;ENPP4;ANXA1;ITGB1;NFE2L2;DDR2;SERPINE1;PLAT;CLEC7A;PRDX2;THBD;THBS1;ACTG1;XBP1;CXCR4;EMILIN2;CLDN1;CD36	7.19339	1.18e-10
GOBP_EYE_MORPHOGENESIS	CITED2;C12orf57;COL5A1;COL5A2;COL8A1;CTNNB1;JAG1;EPHA2;HIPK1;ALDH1A3;FBN1;EFEMP1;RPGRIP1L;TSPAN12;IFT172;CRB2;HIF1A;HMGN1;IHH;AHI1;BCL2;RORB;RP1;PRDM1;SLC1A1;PHACTR4;SOX9;STAT3;ZEB1;THY1;TWIST1;VEGFA;WNT2;CEP290;MFSD2A;PROM1;IGFN1	3.97846	1.19e-10
GOBP_REGULATION_OF_ENDOCYTOSIS	RAB31;AP2M1;CLU;DAB2;DKK1;ARC;CD2AP;GATA2;ABL2;GPC3;ANXA2;HNRNPK;APOC1;APOE;INSR;ARF1;LGALS3;LRP1;LRPAP1;ARRB2;SERPINE1;AHI1;PPT1;AXL;B2M;PTPN1;RAC1;ROCK1;BICD1;CCL21;SDCBP;SFRP4;C3;VEGFA;WDR54;CAV1;NUMB;SPHK1;CD14;CD36;CD63;ZFYVE16;CD151;CDC42	3.43929	1.24e-10
GOBP_CELLULAR_RESPONSE_TO_RADIATION	TANK;CDKN1A;NET1;RUVBL2;CARD16;CRIP1;CRYAB;COPS9;CYBA;GADD45A;EEF1D;EGR1;ZBTB1;XRCC6;GRB2;HSPA5;IFI16;KCNE1;RHOB;GTF2H5;MDM2;MFAP4;MGMT;MME;MMP2;MYC;NPM1;MAP3K20;PIK3R1;PPID;USP47;PTGS2;RP1;RPL26;SFRP1;SFRP2;NUCKS1;SNAI2;TIMP1;CCND2;RBX1	3.63611	1.26e-10
GOBP_VESICLE_ORGANIZATION	PDCD6IP;PDCD6;TMED2;CORO1A;AP2M1;TRAPPC5;STX2;MAPK15;SEC31A;CD2AP;BACE2;ARFGAP3;BLOC1S1;CHMP2A;TRARG1;CHMP4A;ANXA1;ANXA2;INSIG1;KCNE1;ASIP;RNASEK;HOOK1;ATP6V1D;CHMP5;ATP6V1A;ATP6V0C;PLA2G5;ATP6V0B;TMED9;FNBP1L;ARL8B;LAPTM4B;SRGN;CHMP1B;NECTIN2;TRAPPC1;RAB13;BCL2;RFX2;S100A10;SDC4;SDCBP;ANXA8;TMF1;TRAPPC6A;PLEKHF2;RAB34;SRPX;CAV1;VAMP8;STX11;SNX3;RAB11A;SPHK1;SQSTM1;AP1S2;VAPA;ATP6V1F;ZFYVE16;ZEB2	2.75007	1.26e-10
GOBP_KIDNEY_MORPHOGENESIS	BASP1;OSR1;CTNNB1;AGTR2;FOXJ1;GCNT1;GPC3;HOXB7;HES1;ILK;LAMA5;LIF;TACSTD2;MYC;PBX1;WNT4;AHI1;LGR4;PRKX;PTCH1;BCL2;SOX4;SOX9;HNF1B;VEGFA;PAX8;IRX3;GCNT3	5.23789	1.33e-10
GOBP_REGULATION_OF_BMP_SIGNALING_PATHWAY	TOB1;FSTL1;ENG;FBN1;DKK1;SULF1;GATA4;GATA6;GPC3;CRB2;HES1;CCN1;RBPJ;ILK;ITGA3;LRP2;MSX1;MSX2;NBL1;CRIM1;HTRA1;SFRP1;SFRP2;SFRP4;SKIL;SORL1;TNFAIP6;UBE2D3;FBXL15;CHRDL1	4.85186	1.35e-10
GOBP_CARDIAC_CHAMBER_DEVELOPMENT	CITED2;SEMA3C;CNTRL;ADAMTS6;COL11A1;CPE;JAG1;DSP;EDNRA;ENG;FKBP1A;GATA4;GATA6;GJA5;HIF1A;HES1;CCN1;RBPJ;LRP2;MDM2;MSX2;PKP2;HEG1;PRDM1;SFRP2;SLIT3;SOX4;TBX3;TGFB1;TPM1;WNT2;PAX8;DNAH11;NRP1;DHRS3;HAND2;ADAMTS1;MATR3	3.8641	1.36e-10
GOBP_NEGATIVE_REGULATION_OF_ION_TRANSPORT	MRLN;PPIF;LILRB2;ARL6IP5;CLIC2;SLC43A2;OSR1;ADRA2A;ADRA2C;PTK2B;FKBP1A;GEM;ANK3;HES1;KCNE1;LEP;C4orf3;PTGS2;BCL2;RGS2;RGS4;RRAD;SFRP4;SRI;STC1;TMBIM6;TNF;TRH;TWIST1;SUMO1;VDAC1;YWHAE;SLC30A1;CALM1;CALM2;CAV1;SESTD1;SLC9A3R1	3.8641	1.36e-10
GOBP_RAS_PROTEIN_SIGNAL_TRANSDUCTION	WASF2;RASGRP2;SPRY1;CDKN1A;NET1;CDC42EP3;PDPN;CFL1;AKAP13;PARK7;GABARAP;COL1A2;COL3A1;ADRA2A;RASGEF1B;AIF1;EPS8;PSD3;KANK2;ABL2;GPR17;GRB2;RAPGEF1;RANGRF;TAX1BP3;IGF1;APOE;ITGA3;ITGB1;JUN;RHOA;RHOB;STMN1;ARHGDIB;MET;F11R;LRRC59;BRK1;CDC42SE2;HEG1;SHTN1;RHOU;RAC1;RAC2;RALGDS;RAP1A;RAP1B;RIT1;ROCK1;RRAS;SDCBP;PHACTR4;WAS;RERG;NRP1;SQSTM1;DOK2;ARHGEF2;CYTH1;ARHGAP29;CDC42	2.74062	1.42e-10
GOBP_POSITIVE_REGULATION_OF_GROWTH	BASP1;CIB1;AGR2;DNPH1;MTPN;CRABP2;CYBA;DDX3X;ARX;EDN1;EIF4G2;PTK2B;PLCB1;FN1;MACF1;GATA6;SERP1;GOLGA4;SFN;IGF1;IGFBP1;RBPJ;INSR;RHOA;KRT17;LEP;MAP1B;MMP14;PIM1;PPIB;USP47;SHTN1;BCL2;S100A8;S100A9;SDCBP;CXCL12;SFRP1;SFRP2;VEGFA;EZR;WNT2;CXCR4;SLC44A4;MFSD2A;YBX3;NRP1;SPHK1;SEMA5A;CDC42	3.11463	1.45e-10
GOBP_DEVELOPMENTAL_CELL_GROWTH	SEMA6B;SEMA3C;PDLIM5;AKAP13;CRABP2;CTNNB1;DPYSL2;EDN1;EDNRA;CTTN;C9orf72;ALCAM;PI16;COBL;FN1;MACF1;GATA4;GOLGA4;HSP90AA1;HSP90AB1;IFRD1;IGF1;APOE;ITGB1;MAP1B;SEMA3G;RTN4;SHTN1;PTPRS;RGS2;RGS4;CXCL12;SLIT3;SOX9;SPP1;VCL;VEGFA;DDR1;CXCR4;SEMA3B;SORBS2;NRP1;SEMA5A;SPAG9;SPAG6;CDH1	3.30185	1.51e-10
GOBP_POSITIVE_REGULATION_OF_TRANSMEMBRANE_TRANSPORT	COX17;AKAP9;SORBS1;ADCYAP1R1;CTSS;CNKSR3;EDN1;EDNRA;ACSL1;LRRC55;FLNA;ARL6IP1;ARC;NIPSNAP2;GPC3;ANK3;IGF1;INSR;ITGB1;KCNE1;NDUFA4;NFE2L2;ATP1B1;ATP1B3;FXYD2;AZIN1;ACSL5;PIK3R1;FXYD1;PLP1;ITLN1;RELN;CCL2;SRI;THY1;TMSB4X;C3;SUMO1;CALM1;NR4A3;CALM2;ACTN4;SLC7A5;VMP1;CAV1;IRS2;SLC9A3R1	3.24984	1.51e-10
GOBP_CELL_CYCLE_PHASE_TRANSITION	CDKN1A;CDK2AP2;CCNO;GPNMB;CCNI;PHB2;CKS2;PLK3;NEK10;DDX3X;DUSP1;EIF4E;AIF1;EPS8;STOX1;MAPK15;PLCB1;CDC26;SYF2;KANK2;CHMP2A;UBE2S;RGCC;GPR132;ANAPC4;NOP53;ANXA1;APEX1;ID2;ID4;IK;ITGB1;MDM2;MLF1;MN1;MUC1;MYC;NASP;NPM1;DDR2;RRM2B;PBX1;RPS27L;TAOK3;ANAPC5;ANAPC11;MAP3K20;USP47;PPP1R10;KMT2E;TCIM;PSME1;PSME2;PTPRC;RHOU;RBBP8;CCND1;BCL2;ACTB;RPL24;RPL26;RPS6;CCL2;BID;NABP1;STK33;SMARCE1;ZFP36L1;ZFP36L2…	2.29039	1.55e-10
GOBP_REGULATION_OF_ADAPTIVE_IMMUNE_RESPONSE	NLRP3;SLC15A4;CD55;AHR;ZBTB1;FOXJ1;PYCARD;ANXA1;HLA-A;HLA-B;HLA-DRA;HLA-DRB1;HLA-E;HMGB1;HSPD1;IL1B;IL1R1;IL6ST;IL7R;IL10;IL18;IRF1;JUNB;CD46;B2M;PTPRC;NECTIN2;SAMSN1;NFKBIZ;CLEC7A;SLC11A1;TFRC;TGFB1;TNF;TNFAIP3;TNFRSF1B;C3;C4BPA;WAS;NFKBID;CD48;CD81	3.53424	1.59e-10
GOBP_REGULATION_OF_INTRINSIC_APOPTOTIC_SIGNALING_PATHWAY_BY_P53_CLASS_MEDIATOR	EIF5A;HNRNPK;MDM2;MIF;MSX1;MUC1;MYC;RRM2B;BCL2;RPL11;RPL26;RPS7;UBB;PTTG1IP;CD44;CD74	12.2921	1.6e-10
GOBP_NEGATIVE_REGULATION_OF_ORGANELLE_ORGANIZATION	PPIF;WASF2;LILRB2;CIB1;TRIOBP;CORO1A;OMA1;CLU;ADD3;PLEKHH2;MTPN;DUSP1;EPS8;SPEF1;NUPR1;PRELID1;GCLC;CHMP4A;SLC25A4;SLC25A5;SLC25A6;GSN;HNRNPA1;HNRNPC;HNRNPU;HSPA1A;IGF1;IK;STMN1;LIF;LMNA;TACSTD2;ARRB2;MAP1B;MAP4;MET;NPM1;F11R;SHANK1;LIMA1;PFN1;PFN2;PIK3R1;AURKAIP1;ODF2L;TWF1;SPTBN1;SPTBN2;TFRC;TSPO;TJP1;TMSB4X;WAS;CAPZA2;RHPN2;TMEM67;MYADM;TMSB10;ARHGEF2;TRIP13;GMFG;CCP110	2.70286	1.64e-10
GOBP_REGULATION_OF_ION_TRANSMEMBRANE_TRANSPORT	MRLN;COX17;PPIF;AKAP9;ARL6IP5;AHCYL1;CORO1A;PARK7;PHB2;ADCYAP1R1;CLIC1;CLIC2;SLC43A2;OSR1;TMEM37;ADRA2A;CTSS;CYBA;CYBB;CNKSR3;DAPK1;EDN1;EDNRA;PTK2B;LRRC55;FKBP1A;FLNA;ARL6IP1;ARC;CLIC4;NIPSNAP2;GEM;GNB2;ANK3;RANGRF;ITGB1;KCNE1;C4orf3;NDUFA4;ATP1B1;ATP1B3;FXYD2;SHANK1;PDE4B;FXYD1;FXYD3;PLP1;FXYD5;RELN;BCL2;RGS2;RGS4;RRAD;SCN4A;SCN7A;CCL2;SRI;TMBIM6;THY1;TMSB4X;TNF;TWIST1;SUMO1;UTRN;VDAC1;YWHAE;YW…	2.369	1.67e-10
GOBP_MITOTIC_CELL_CYCLE_PHASE_TRANSITION	CDKN1A;CDK2AP2;CCNO;GPNMB;CCNI;PHB2;CKS2;PLK3;DDX3X;DUSP1;EIF4E;AIF1;EPS8;STOX1;PLCB1;CDC26;SYF2;KANK2;CHMP2A;UBE2S;RGCC;GPR132;ANAPC4;NOP53;ANXA1;APEX1;ID2;ID4;IK;ITGB1;MDM2;MUC1;MYC;NASP;DDR2;RRM2B;PBX1;RPS27L;TAOK3;ANAPC5;ANAPC11;USP47;KMT2E;PSME1;PSME2;RHOU;RBBP8;CCND1;BCL2;ACTB;RPL24;RPL26;RPS6;CCL2;BID;NABP1;SMARCE1;ZFP36L1;ZFP36L2;TPD52L1;WEE1;FBXL15;NEK11;CALM1;CALM2;TMEM14B;RAB11A;CCNA1;…	2.4457	1.77e-10
GOBP_PATTERN_RECOGNITION_RECEPTOR_SIGNALING_PATHWAY	TNIP1;IRAK3;PHB2;NLRP3;SLC15A4;CTSS;CYBA;DDX3X;ESR1;FCN1;LY96;CLEC4E;GPS2;PYCARD;NOP53;HMGB1;BIRC3;HSPA1A;HSPA1B;HSPD1;IRAK1;IRAK2;IRF1;LTF;ARRB2;NFKBIA;NINJ1;LGR4;MAP2K6;RTN4;PELI1;S100A14;PTPRS;SEC14L1;TLR2;TSPAN6;TNF;TNFAIP3;CAV1;CD14;CD36	3.58745	1.77e-10
GOBP_MUSCLE_CELL_DEVELOPMENT	MYL9;PDLIM5;AKAP13;COMP;ADM;CSRP1;CSRP2;CXADR;RCAN1;EDN1;EDNRA;ENG;PI16;FLNC;GATA4;MYOF;EFEMP2;HNRNPU;HES1;IGF1;ITGB1;KRT19;LMNA;MYH11;ATP2A2;PDGFRA;PRKAR1A;BCL2;RGS2;RGS4;NIBAN2;TBX3;ACTG1;TPM1;VEGFA;ACTN4;SORBS2;ACTN1;CFLAR;MYLK3;HOMER1	3.58745	1.77e-10
GOBP_NEGATIVE_REGULATION_OF_TRANSMEMBRANE_TRANSPORT	MRLN;PPIF;ARL6IP5;CLIC2;SLC43A2;OSR1;ADRA2A;FABP5;FKBP1A;GEM;ANK3;IL1B;KCNE1;LEP;C4orf3;OAZ1;SELENOS;BCL2;RGS2;RGS4;RRAD;SRI;TMBIM6;THBS1;TNF;TWIST1;SUMO1;VDAC1;YWHAE;SLC30A1;CALM1;CALM2;CAV1;IRS2;SESTD1;SLC9A3R1	4.00122	1.84e-10
GOBP_MITOCHONDRIAL_MEMBRANE_ORGANIZATION	TOMM6;PPIF;MTX2;OMA1;MICOS13;ROMO1;EYA2;SAMM50;TIMM13;TIMM8B;GCLC;SLC25A4;SLC25A5;SLC25A6;HSPA1A;HSPA9;HSP90AA1;CHCHD10;TOMM5;MICOS10;NDUFA13;PMAIP1;TOMM7;BCL2;BID;BNIP3L;VDAC2;UQCC3;ALKBH7;PDCD5;ATP5IF1	4.61552	1.84e-10
GOBP_CARDIAC_CHAMBER_MORPHOGENESIS	CITED2;SEMA3C;COL11A1;CPE;JAG1;DSP;EDNRA;ENG;FKBP1A;GATA4;GATA6;HIF1A;HES1;CCN1;RBPJ;LRP2;MDM2;MSX2;PKP2;HEG1;SFRP2;SLIT3;SOX4;TBX3;TGFB1;TPM1;WNT2;DNAH11;NRP1;DHRS3;HAND2;ADAMTS1	4.46114	1.92e-10
GOBP_REGULATION_OF_CELL_SIZE	SEMA6B;SEMA3C;LAMTOR5;TMEM123;CLNS1A;MTPN;CRABP2;DPYSL2;EDN1;CTTN;FN1;MACF1;GOLGA4;HSP90AA1;HSP90AB1;IFRD1;APOE;IL7R;RHOA;LAMTOR4;MAP1B;MSN;NPM1;PLEK;SEMA3G;RTN4;SHTN1;PTPRS;RAC1;CXCL12;DEPTOR;SPP1;VEGFA;EZR;SEMA3B;SLC12A8;NRP1;SEMA5A;SLC9A3R1;CDH1	3.64513	1.97e-10
GOBP_REGULATION_OF_CELL_MORPHOGENESIS_INVOLVED_IN_DIFFERENTIATION	ACTR2;ARPC2;CIB1;PDPN;FERMT2;TRIOBP;CUX1;DAB2;FBLN1;FLNA;GBP1;ILK;LIMS1;TACSTD2;CAPRIN1;MDK;NEDD9;P4HB;PKP2;RELN;RAC1;S100A10;DOCK5;ACTN4;CALR;NRP1;MYADM;CDC42	5.09182	2.23e-10
GOBP_MRNA_CATABOLIC_PROCESS	TOB1;IGF2BP2;HNRNPA0;CIRBP;DDX5;ERN1;TNRC6B;TUT4;CARHSP1;EDC4;LSM5;FUS;LSM4;SERBP1;PABPC1;LSM1;DCPS;HNRNPAB;HNRNPC;HNRNPU;APEX1;HSPA1A;HSPA1B;EIF3E;NPM1;YBX1;MYEF2;LSM7;POLR2G;RBM38;TENT5A;PNRC2;ZC3HAV1;RNH1;ROCK1;UPF3A;SLC11A1;SSB;ZFP36L1;ZFP36L2;VIM;ZFP36;BTG2;FXR1;YBX3;PABPC4;EIF4A3;RBM8A	3.15329	2.32e-10
GOBP_KERATINOCYTE_DIFFERENTIATION	TXNIP;CSTA;JAG1;DSP;EPHA2;EREG;PALLD;FLG;FLNB;KAZN;FOSL2;CLIC4;INTU;SFN;ANXA1;RBPJ;IL1A;AQP3;IRF6;KRT7;KRT8;KRT10;KRT17;ASAH1;MSX2;NME2;ERRFI1;MAP2K1;PLAAT4;ROCK1;SPRR2F;ZFP36L1;STK4;TGM1;UGCG;ZFP36;IFT74;AKR1C3	3.77615	2.36e-10
GOBP_RHO_PROTEIN_SIGNAL_TRANSDUCTION	NET1;CDC42EP3;PDPN;CFL1;AKAP13;COL1A2;COL3A1;ADRA2A;EPS8;KANK2;ABL2;GPR17;TAX1BP3;APOE;ITGA3;ITGB1;RHOA;RHOB;STMN1;ARHGDIB;MET;F11R;CDC42SE2;HEG1;SHTN1;RHOU;RAC1;ROCK1;PHACTR4;WAS;NRP1;ARHGEF2;ARHGAP29;CDC42	4.16565	2.4e-10
GOBP_REGULATION_OF_PROTEASOMAL_UBIQUITIN_DEPENDENT_PROTEIN_CATABOLIC_PROCESS	TRIB1;STUB1;RACK1;GIPC1;PARK7;GABARAP;CLU;PLK3;DAB2;RYBP;HSPBP1;RNF144B;SVIP;ARIH1;RNF19A;GCLC;NOP53;HSPA1A;HSPA1B;HSP90AB1;MDM2;NFE2L2;UBXN1;RPL11;SDCBP;SUMO2;ELOB;SUMO1;CAMLG;CAV1;EIF3H;ZFAND2A;HERPUD1;RBX1	4.16565	2.4e-10
GOBP_CELLULAR_RESPONSE_TO_ACID_CHEMICAL	KLF2;CEBPB;LAMTOR5;COL1A1;COL1A2;COL3A1;COL4A1;COL5A2;COL6A1;COL16A1;CYBA;CYBB;GCLC;GCLM;LAMTOR2;HNRNPAB;LAMTOR4;MMP2;PDGFRA;ZEB1;TNF;VEGFA;XBP1;CPEB4;SLC7A5;CAPN2	5.48888	2.66e-10
GOBP_CELLULAR_ALDEHYDE_METABOLIC_PROCESS	AKR1A1;PARK7;ADH5;CYP1B1;DAB2;EDNRB;ESD;ALDH1A1;ALDH2;ALDH1A3;ALDH3B1;ABCA4;PNKD;HAGH;IDH2;WNT4;TALDO1;TKT;TPI1;HYI;BCO2;AKR1C3;ALDH1A2	6.40131	2.67e-10
GOBP_REGULATION_OF_MITOCHONDRIAL_MEMBRANE_POTENTIAL	RACK1;ARL6IP5;PRDX3;PARK7;CLIC1;DCN;STOX1;PPA2;PRELID1;GCLC;GCLM;NDUFC2;PMAIP1;SLC25A36;BCL2;BID;SOD1;SOD2;TSPO;UBB;UCP2;BCO2;ATP5IF1	6.40131	2.67e-10
GOBP_HORMONE_METABOLIC_PROCESS	STUB1;CPQ;SLC16A10;ADH1B;ADM;CPE;CRABP2;SELENOM;CTSB;CTSK;CTSL;CTSZ;CYP1B1;DAB2;DIO2;DPP4;EDNRB;EGR1;ESR1;ALDH1A1;ALDH1A3;NR5A1;BACE2;TIPARP;HIF1A;LEP;MME;ATP1A1;NFKB1;PDGFRA;WNT4;POR;BCHE;PLEKHA1;SCPEP1;RBP1;SCG5;SPP1;TSPO;UGT2B7;UGT2B17;PAX8;SRD5A3;BCO2;AKR1C3;ALDH1A2;DHRS3	3.18251	2.73e-10
GOBP_REGULATION_OF_TRANSLATIONAL_INITIATION	EIF1;EIF1B;TMED2;DDX3X;EIF4A2;EIF4B;EIF4G2;EIF5;RPL13A;PPP1R15A;EIF3K;HSPB1;EIF3E;NPM1;PAIP2;POLR2G;PPP1CA;RBM4;CCL5;TNF;PPP1R15B;EIF3H;EIF2AK3;EIF5B;BZW1	5.73927	2.78e-10
GOBP_EPITHELIAL_CELL_MORPHOGENESIS	SPINT2;COL15A1;CLDN3;RILPL2;PALLD;FLNB;CLIC4;IHH;AR;MET;CCDC88C;RAB25;HEG1;ROCK1;STC1;COL18A1	11.609	2.81e-10
GOBP_REGULATION_OF_DNA_BINDING	LAMTOR5;PARK7;CSNK2B;CTNNB1;HMGB1;HMGB2;HES1;ID1;IFI16;IGF1;JUN;LIF;MSX1;MSX2;NFKBIA;NME1;ZNF593;PLAUR;NIBAN2;SRI;TGFB1;TMSB4X;TWIST1;TXN;SUMO1;CALM1;CALM2;EDF1;KLF4;HAND2;DAZAP2	4.51276	2.9e-10
GOBP_EMBRYO_IMPLANTATION	FBLN1;GJA1;IGFBP7;IL1B;ITGB4;ARHGDIB;LIF;MMP2;TPPP3;PRLR;PTGS2;RPL29;SOD1;SPP1;STC1;BSG;TIMP1;VEGFA;DDR1;CALR;VMP1	7.22581	2.91e-10
GOBP_REGULATION_OF_LEUKOCYTE_MEDIATED_IMMUNITY	NLRP3;SLC15A4;CD55;AHR;FGR;ZBTB1;FOXJ1;CADM1;GATA2;HLA-A;HLA-B;HLA-DRA;HLA-DRB1;HLA-E;HMGB1;HSPD1;ICAM1;IL1B;IL1R1;IL7R;IL10;IL18;ITGAM;ITGB2;LEP;ARRB2;CD46;SERPINB9;B2M;PTPRC;NECTIN2;RAC2;CLEC7A;SPI1;STXBP2;BST2;TFRC;TGFB1;TNF;TNFRSF1B;C3;C4BPA;TYROBP;WAS;VAMP8;DDX21;CD81	3.16612	3.16e-10
GOBP_AXONEMAL_DYNEIN_COMPLEX_ASSEMBLY	DNAAF1;DNAAF4;DNAH5;DNAI1;TEKT2;CCDC39;CFAP100;DNAAF3;CFAP73;ZMYND10;CCDC40;DNAH7;DNAI2;SPAG1;DNAL1;CCDC65;DRC1	10.0947	3.5e-10
GOBP_RESPONSE_TO_AXON_INJURY	CTNNA1;DPYSL3;AIF1;FLNA;FOLR1;GRN;APOD;JUN;MAP1B;MMP2;AXL;MAP2K1;MAP2K2;PTN;PTPRF;PTPRS;BCL2;SLC1A1;SOD1;SOD2;SPP1;TSPO;THY1;TYROBP;KLF4;NREP	5.40172	3.5e-10
GOBP_POSITIVE_REGULATION_OF_CELL_CYCLE	CITED2;SMC2;GIPC1;PHB2;CKS2;CCN2;DDX3X;EDN1;EIF4E;AIF1;EREG;STOX1;PPP1R35;MAPK15;MAPRE3;PLCB1;NUPR1;RGCC;ANXA1;HNRNPU;APEX1;HES1;IGF1;IL1A;IL1B;IL10;INSR;RHOA;MDM2;MEIS2;MSX1;MSX2;NPM1;DDR2;RRM2B;PBX1;ANAPC5;ANAPC11;MAP3K20;PLSCR1;WNT4;PPP1R10;KMT2E;LGMN;CCND1;RPS15A;SFPQ;TBX3;DYNLT3;TGM1;TNF;UBE2B;DDX39B;CSPP1;CALR;PKP4;RAB11A;SPHK1;CCND2;ADAMTS1;CDC42	2.66731	3.56e-10
GOBP_STRIATED_MUSCLE_CONTRACTION	AKAP9;CHGA;C12orf57;CLIC2;CCDC78;CCN2;DSG2;DSP;FLNA;GATA4;GJA1;GJA5;RANGRF;GSN;NR4A1;HSP90AA1;JUP;KCNE1;ARG2;SMAD5;ATP1A1;ATP1B1;ATP2A2;PDE4B;PKP2;MAP2K3;MAP2K6;RGS2;SCN4A;SRI;STC1;TNF;TPM1;SUMO1;CXCR4;CALM1;CALM2;CAV1;HOMER1	3.62871	3.65e-10
GOBP_ACTIN_MEDIATED_CELL_CONTRACTION	AKAP9;PDPN;MYL6B;DSG2;DSP;FLNA;GATA4;GJA1;GJA5;RANGRF;GSN;JUP;KCNE1;CCDC88C;MYH2;MYL6;ATP1A1;ATP2A2;PDE4B;PKP2;SHTN1;ACTA2;ROCK1;SRI;STC1;TPM1;SUMO1;CAV1	4.95438	3.7e-10
GOBP_ENDOPLASMIC_RETICULUM_UNFOLDED_PROTEIN_RESPONSE	PIGBOS1;STUB1;RACK1;AGR2;TMED2;CREB3L4;ERN1;PPP1R15A;SERP1;HSPA5;DNAJB9;ATF3;NFE2L2;PIK3R1;DNAJC10;SELENOS;PTPN1;CCND1;XBP1;PPP1R15B;MBTPS1;DERL3;EIF2AK3;HERPUD1	5.92369	3.77e-10
GOBP_APICAL_JUNCTION_ASSEMBLY	PDCD6IP;CLDN4;CLDN3;CLDN7;FRMPD2;CTNNA1;EPHA2;CLDN15;RHOA;RHOC;ARL2;AFDN;NPHP1;F11R;RAB13;ROCK1;SNAI2;TJP1;TNF;VCL;OCEL1;CLDN10;CLDN1;DLG5	5.92369	3.77e-10
GOBP_POSITIVE_REGULATION_OF_SUBSTRATE_ADHESION_DEPENDENT_CELL_SPREADING	ARPC2;CIB1;FERMT2;TRIOBP;DAB2;FLNA;ILK;LIMS1;MDK;NEDD9;P4HB;RAC1;S100A10;DOCK5;CALR;NRP1;MYADM;CDC42	9.04655	3.78e-10
GOBP_NEGATIVE_REGULATION_OF_PROTEIN_MODIFICATION_BY_SMALL_PROTEIN_CONJUGATION_OR_REMOVAL	IVNS1ABP;PARK7;CTNNB1;COPS9;GCLC;GPS2;DNAJA1;HSPA1A;HSPA1B;ARRB2;UBXN1;TRIM44;PPIA;RPL5;RPL11;RPL37;RPS3;RPS7;RPS15;RPS20;SOX4;TSPO;TNFAIP3;CAMLG;CAV1;SQSTM1;RPL23	5.12239	4.17e-10
GOBP_REGULATION_OF_CELL_JUNCTION_ASSEMBLY	PDLIM5;FERMT2;COL16A1;CLDN3;EPHA2;DKK1;MACF1;NEGR1;RAPGEF1;APOD;IL1B;RHOA;LIMS1;MMP14;NPHP1;F11R;WNT4;VPS35;RAC1;RAP1A;RAP1B;ROCK1;S100A10;SDC4;CLSTN2;SFRP1;SNAI2;THBS1;THBS2;THY1;TJP1;TLN1;TLR2;ACTG1;TNF;VCL;VEGFA;IRX3;CAV1;NRP1;CLDN1;DLG5	3.40284	4.21e-10
GOBP_REGULATION_OF_LIPID_BIOSYNTHETIC_PROCESS	SORBS1;ADM;DAB2;EGR1;FABP5;ACSL3;NR5A1;ZBTB20;ORMDL2;ANXA1;APOC1;APOE;IGFBP7;CCN1;IL1A;IL1B;INSIG1;LDLR;LEP;ASAH1;ATP1A1;NFKB1;PDK4;WNT4;POR;PTGS2;SNAI2;SOD1;STAR;TSPO;TNF;C3;LPCAT1;CAPN2;MFSD2A;AKR1C3;MBTPS1;SPHK1;CD74	3.60306	4.34e-10
GOBP_NEPHRON_EPITHELIUM_DEVELOPMENT	CD24;BASP1;OSR1;CTNNB1;JAG1;AGTR2;EDNRA;EDNRB;FOXJ1;GPC3;HOXB7;HES1;ILK;LAMA5;LIF;TACSTD2;MYC;PBX1;PODXL;WNT4;AHI1;LGR4;PTCH1;BCL2;SOX9;HNF1B;VEGFA;PAX8;IRX3;PROM1	4.56926	4.36e-10
GOBP_RESPONSE_TO_IONIZING_RADIATION	TANK;CDKN1A;NET1;CRYAB;CYBA;GADD45A;EEF1D;EGR1;XRCC6;GRB2;ANXA1;HSPA5;IFI16;IL1A;RHOB;GTF2H5;MDM2;MGMT;MYC;MAP3K20;PTPRC;CCND1;BCL2;RPL26;SFRP1;SFRP2;NUCKS1;NABP1;SNAI2;SOD2;THBD;VCAM1;CCND2;RNF8	4.05186	4.38e-10
GOBP_PLASMA_MEMBRANE_ORGANIZATION	CLU;COL5A1;STX2;EPB41L3;FOLR1;MYOF;SERP1;CHMP2A;ANK3;CHMP4A;GSN;ANXA2;AR;ATP2A2;SERPINA5;SH3GLB1;CHMP5;PLSCR1;FNBP1L;ARL8B;PLSCR4;CHMP1B;PTPRC;S100A9;S100A10;SOD1;SPTBN1;UGCG;CXCR4;AHNAK;ATG9A;VMP1;DEGS1;CAV1;CD9;DMKN;SLC9A3R1	3.76136	4.4e-10
GOBP_HORMONE_TRANSPORT	KDM5B;CHGA;PARK7;SLC16A10;ADM;CPE;SELENOM;ADRA2A;DAB2;EDN1;ACSL4;FOXO1;MPC2;GJA1;SERP1;GLUL;ANXA1;HIF1A;HLA-DRB1;ICA1;IL1B;IL1RN;LEP;LIF;PIM3;OSM;PFKL;CCDC186;RBM4;RFX3;CCL5;SFRP1;SCG5;NIBAN2;SLC16A1;SOX4;SPP1;SRI;TBX3;HNF1B;TSPO;TMF1;TNF;TRH;UCP2;PAX8;RAB11FIP1;SLC7A5;LTBP4;IRS2;VAMP8;MIDN;AIMP1;HMGN3	2.85167	4.47e-10
GOBP_RESPONSE_TO_CAMP	AKAP9;COL1A1;CYP1B1;AHR;PTK2B;FOS;FOSB;GATA6;GPD1;RAPGEF1;APEX1;HSPA5;IGFBP5;AQP9;AREG;KCNE1;PER1;PLAT;RAP1A;RAP1B;RPLP0;ZFP36L1;STC1;BSG;THBD;EZR	5.31652	4.59e-10
GOBP_MATERNAL_PLACENTA_DEVELOPMENT	CITED2;PRDX3;TMED2;CTSB;TCF23;GJB2;JUNB;LIF;TPPP3;PTGS2;PTN;PRDM1;SPP1;STC1;BSG;NR2F2	10.9979	4.84e-10
GOBP_HYDROGEN_PEROXIDE_METABOLIC_PROCESS	PRDX4;PRDX3;PARK7;CYBA;CYBB;PRDX5;GPX3;HBA1;HBA2;HBB;HP;MT-CO2;PRDX1;RAC1;RAC2;SOD1;SOD2;PRDX2;PXDN;CAT	7.46972	4.95e-10
GOBP_NEGATIVE_REGULATION_OF_CELL_ACTIVATION	LILRB2;GPNMB;CEBPB;FGL2;FGR;FOXJ1;ALOX12;GCLC;GRN;ANXA1;HLA-DRB1;HMGB1;ID2;APOE;IHH;IL10;IDO1;IRF1;ARG2;LDLR;LGALS3;MDK;MNDA;PAWR;PDGFRA;PRKAR1A;AXL;PELI1;PTPRC;SDC4;SAMSN1;VSIR;SFRP1;SPI1;PRDX2;THBD;TNFAIP3;TYROBP;LAPTM5;LST1;RASSF5;DLG5;CD9;CD74	3.2637	5.04e-10
GOBP_POSITIVE_REGULATION_OF_ENDOCYTOSIS	RAB31;AP2M1;CLU;DAB2;GATA2;GPC3;ANXA2;HNRNPK;APOE;INSR;LRP1;ARRB2;SERPINE1;AHI1;PPT1;AXL;B2M;BICD1;CCL21;SFRP4;C3;VEGFA;CD14;CD36;CD63;CD151;CDC42	5.04994	5.39e-10
GOBP_ORGANELLE_DISASSEMBLY	PLAAT3;PARK7;PHB2;GABARAP;GABARAPL2;PLIN2;SPATA33;PLK3;SPATA18;CTSK;CTTN;GABARAPL1;SLC25A4;SLC25A5;HIF1A;KIF5B;MAP1LC3C;NEDD9;FIS1;UFC1;RETREG1;TOMM7;VPS13C;WDR45B;KIF9;BNIP3L;TSPO;VDAC1;ATG9A;MAP1LC3B;MAP1LC3A;SQSTM1;ATP5IF1	4.11905	5.53e-10
GOBP_STEROID_METABOLIC_PROCESS	STUB1;NPC2;ADM;CYP1B1;DAB2;EDNRB;EGR1;ESR1;FDFT1;FDPS;FDXR;NR5A1;TIPARP;HDLBP;HMGCR;HMGCS1;APOC1;APOE;IGFBP7;IL1A;INSIG1;LDLR;LEP;LEPR;LIPA;LRP2;ASAH1;ATP1A1;NFKB1;PBX1;LIMA1;PDGFRA;CYB5R1;WNT4;POR;PRLR;LGMN;PLEKHA1;SCP2;SNAI2;SOD1;SPP1;SQLE;STAR;TSPO;TNF;UGT2B7;UGT2B17;YWHAH;SRD5A3;HINT2;CAT;AKR1C3;SERPINA6;MBTPS1;CH25H	2.76863	5.55e-10
GOBP_ALCOHOL_METABOLIC_PROCESS	AKR1A1;NPC2;PARK7;ADCYAP1R1;ADH1B;ADH5;CYP1B1;DAB2;SPTSSA;EDNRB;ALDH1A1;ALDH2;PTK2B;ALDH1A3;ALDH3B1;FDFT1;FDPS;FDXR;PLCB1;GCH1;GK;GPD1;PGP;HDLBP;HMGCR;HMGCS1;APOC1;IDH2;IGF1;APOE;IMPA2;INSIG1;LDLR;LEP;LEPR;LRP2;ASAH1;NFKB1;PCBD1;LIMA1;PLEK;DPM3;WNT4;POR;SLC5A3;SOD1;SORD;SQLE;STAR;TPI1;SRD5A3;CAT;PLPP1;PLPP2;PLPP3;AKR1C3;MBTPS1;ALDH1A2;SPHK1;CH25H;DHRS3	2.63208	5.57e-10
GOBP_REGULATION_OF_EXTRINSIC_APOPTOTIC_SIGNALING_PATHWAY_VIA_DEATH_DOMAIN_RECEPTORS	PARK7;DDX3X;HMGB2;ICAM1;LGALS3;ATF3;SERPINE1;PMAIP1;FAIM;SFRP1;SFRP2;SKIL;BMPR1B;STK4;THBS1;TIMP3;TNFAIP3;CFLAR;ARHGEF2	8.01014	5.57e-10
GOBP_PROTEIN_CONTAINING_COMPLEX_DISASSEMBLY	CIB1;CFL1;DSTN;TRIOBP;IRAK3;ADD3;PLEKHH2;MTPN;EIF5A;EPS8;SPEF1;CHMP2A;CHMP4A;GSN;HMGA1;HSPA8;INSR;KIF2A;KIF5B;STMN1;STMND1;MAP1B;MAP1LC3C;MYC;ATP2A2;LIMA1;CHMP5;PLEK;DDIT4;PPP1CA;CHMP1B;MICAL3;TWF1;SET;SMARCE1;SPTBN1;SPTBN2;TNF;CALM1;MAP1LC3B;VMP1;CAPZA2;MAP1LC3A;VAMP8;SEMA5A;ARHGEF2;RPL23	3.10217	5.58e-10
GOBP_MACROPHAGE_CHEMOTAXIS	CSF1R;DDT;EDNRB;PTK2B;LGALS3;MDK;MIF;MMP2;CKLF;RARRES2;SAA1;CCL2;CCL3;CCL5;THBS1;C3AR1;C5AR1	9.6557	5.67e-10
GOBP_INTERLEUKIN_6_PRODUCTION	LILRB2;KLF2;SPON2;CEBPB;IRAK3;CYBA;AIF1;EREG;FOXJ1;ZBTB20;GAS6;PYCARD;HLA-B;HMGB1;HSPD1;IL1A;IL1B;IL10;LEP;LPL;ARRB2;MBP;POU2AF1;SELENOS;SELENOK;CLEC7A;STAT3;TLR2;TNF;TNFAIP3;TWIST1;TYROBP;XBP1;CAPN2;ARHGEF2;CD36;CD47;CD74	3.63807	5.71e-10
GOBP_ENDOTHELIAL_CELL_PROLIFERATION	PDCD6;LRG1;CYBA;ECM1;EGR3;EPHA2;ERN1;F3;FGF7;SULF1;GATA2;ANG;RGCC;HIF1A;HMGB1;HMGB2;NR4A1;APOE;IL10;JUN;LEP;MDK;MMP14;ATP5F1A;PLXNB3;MYDGF;PRKX;CCL2;CXCL12;SPARC;STAT3;NR2F2;THBS1;TNF;VEGFA;WNT2;CAV1;NRP1;ALDH1A2;SEMA5A;AIMP1;ATP5IF1	3.36118	5.77e-10
GOBP_NEGATIVE_REGULATION_OF_NEURON_APOPTOTIC_PROCESS	CEBPB;CORO1A;PARK7;ERBB3;PTK2B;GCLC;GCLM;GRN;HDGF;HIF1A;HSP90AB1;APOE;IL6ST;IL10;JUN;RHOA;ARRB2;MDK;NR4A2;RETREG1;OXR1;PPT1;AXL;LGMN;CCND1;BCL2;ROCK1;CCL2;SET;SLC1A1;SOD1;SOD2;BTG2;CPEB4;NRP1	3.88803	6.12e-10
GOBP_NEGATIVE_REGULATION_OF_PROTEIN_CONTAINING_COMPLEX_ASSEMBLY	TRIOBP;PARK7;CLU;ADD3;MTPN;CLDN7;CRYAB;DDX3X;EPS8;DKK1;RPL13A;SVIP;TRAF3IP1;DNAJC15;GSN;NOP53;HMGB1;HSPA5;STMN1;PFN1;PFN2;VPS35;PMEPA1;TWF1;SORL1;SOX9;SPTBN1;SPTBN2;TMSB4X;VDAC2;CAPZA2;MYADM;TMSB10;CDC42	3.97939	6.48e-10
GOBP_FOCAL_ADHESION_ASSEMBLY	SORBS1;FERMT2;COL16A1;CTTN;PTK2B;MACF1;APOD;RHOA;LIMS1;MMP14;WNT4;RAC1;BCL2;ROCK1;S100A10;SDC4;SFRP1;THBS1;THY1;TLN1;ACTG1;VCL;VEGFA;ACTN1;NRP1	5.45221	6.49e-10
GOBP_ARTERY_MORPHOGENESIS	CITED2;COL3A1;COMP;JAG1;EDN1;EDNRA;ENG;FOLR1;GJA5;EFEMP2;HES1;APOE;RBPJ;LDLR;LRP1;LRP2;MDK;PRRX1;ADAMTS9;PRDM1;SOX4;VEGFA;NRP1;HAND2	5.70853	6.81e-10
GOBP_RESPONSE_TO_ACID_CHEMICAL	KLF2;CEBPB;LAMTOR5;COL1A1;COL1A2;COL3A1;COL4A1;COL5A2;COL6A1;COL16A1;CCN2;CYBA;CYBB;NQO1;EDN1;GCLC;GCLM;LAMTOR2;HNRNPAB;RHOA;LAMTOR4;MMP2;PDGFRA;ZEB1;TMBIM6;TNF;VEGFA;XBP1;CPEB4;SLC7A5;CAPN2;LRP11	4.19302	6.92e-10
GOBP_ESTABLISHMENT_OF_ORGANELLE_LOCALIZATION	PDCD6IP;PDCD6;AP1M2;SPRY1;CFL1;NUDC;TMED2;KIF3A;CHGA;TRAPPC5;CTNNB1;MAPK15;FGR;SYNE2;SUN1;GATA2;ARFGAP3;BLOC1S1;GEM;GJA1;CHMP2A;TMEM230;CHMP4A;HIF1A;HNRNPU;HSBP1;ITGB1;KIF5B;KIF22;LLGL2;LMNA;MAP1B;MAP4;ASIP;MYO6;NPM1;PCM1;CEP83;CHMP5;TMED9;FNBP1L;CCDC186;CHMP1B;PTGDS;NECTIN2;TRAPPC1;RAC2;RAN;RPS15;S100A13;BICD1;SDC4;SDCBP;MYO1G;STXBP2;DYNLT1;UBB;UBE2B;EZR;YWHAZ;TRAPPC6A;CLMN;NR4A3;ACTN4;UXT;VAMP8…	2.44358	7.16e-10
GOBP_POSITIVE_REGULATION_OF_CELL_MATRIX_ADHESION	CIB1;FERMT2;COL16A1;PTK2B;EFEMP2;JUP;LIMS1;WNT4;RAC1;ROCK1;RRAS;S100A10;CCL21;SDC4;SFRP1;THY1;UTRN;VEGFA;NRP1;CD36	7.26204	7.18e-10
GOBP_FORMATION_OF_CYTOPLASMIC_TRANSLATION_INITIATION_COMPLEX	EIF3M;EIF5;EIF3K;EIF3E;EIF3L;EIF3A;EIF3D;EIF3F;EIF3G;EIF3H;EIF2S2	28.692	7.57e-10
GOBP_PEPTIDE_ANTIGEN_ASSEMBLY_WITH_MHC_CLASS_II_PROTEIN_COMPLEX	HLA-DMA;HLA-DMB;HLA-DPA1;HLA-DPB1;HLA-DQA1;HLA-DQA2;HLA-DQB1;HLA-DRA;HLA-DRB1;HLA-DRB5;B2M	28.692	7.57e-10
GOBP_CARDIAC_NEURAL_CREST_CELL_DIFFERENTIATION_INVOLVED_IN_HEART_DEVELOPMENT	CITED2;SEMA3C;JAG1;EDN1;EDNRA;ENG;FOLR1;HES1;TWIST1;HAND2;CDC42	28.692	7.57e-10
GOBP_AUTOPHAGY_OF_MITOCHONDRION	PARK7;PHB2;GABARAP;GABARAPL2;SPATA33;SPATA18;CTSK;CTTN;GABARAPL1;SLC25A4;SLC25A5;HIF1A;MAP1LC3C;FIS1;RETREG1;TOMM7;VPS13C;WDR45B;BNIP3L;TSPO;VDAC1;ATG9A;MAP1LC3B;MAP1LC3A;SQSTM1;ATP5IF1	5.15573	7.79e-10
GOBP_METANEPHROS_DEVELOPMENT	SPRY1;BASP1;OSR2;OSR1;CTNNB1;CTSH;AGTR2;EGR1;FBN1;FOXJ1;GPC3;HES1;ID3;LIF;MYC;PDGFRA;WNT4;LGR4;PTCH1;BCL2;SOX17;SOX9;HNF1B;PAX8;IRX3;DLG5	5.15573	7.79e-10
GOBP_AMIDE_TRANSPORT	PDPN;CHGA;PARK7;SLC16A10;SLC15A4;CPE;ADRA2A;EDN1;ACSL4;FOXO1;FOLR1;MPC2;GJA1;SERP1;GLUL;ANXA1;HIF1A;HLA-DRB1;ICA1;IL1B;IL1RN;AQP3;AQP9;LEP;LRP2;PIM3;MGST1;PFKL;PLTP;CCDC186;SLC47A1;PSAP;RBM4;RFX3;S100A8;CCL5;SFRP1;SLC15A1;SLC16A1;SOX4;SRI;HNF1B;TNF;TRH;UCP2;PAX8;IRS2;MIDN;VAPA;AIMP1;HMGN3;SLC9A3R1;CD74	2.83232	7.88e-10
GOBP_CARDIAC_NEURAL_CREST_CELL_DEVELOPMENT_INVOLVED_IN_OUTFLOW_TRACT_MORPHOGENESIS	SEMA3C;JAG1;EDN1;EDNRA;ENG;FOLR1;HES1;TWIST1;HAND2;CDC42	43.456	7.98e-10
GOBP_SPERM_FLAGELLUM_ASSEMBLY	CFAP54;CFAP206;CFAP221;CFAP65;CFAP157;CFAP47;IFT81;MNS1;CFAP44;UBE2B;SPAG16;CFAP69;SPEF2;CFAP43;TPGS1;SPAG6	10.4479	8.13e-10
GOBP_OVULATION_CYCLE_PROCESS	A2M;EREG;ESR1;FOXO3;NR5A1;HSPA5;LEP;ARRB2;MMP2;PAM;PDGFRA;PGR;MAP2K6;PTX3;PLEKHA1;BMPR1B;SLIT3;TNFAIP6;ADAMTS1	7.75959	8.29e-10
GOBP_POSITIVE_REGULATION_OF_PEPTIDYL_TYROSINE_PHOSPHORYLATION	CD24;CSF1R;ADRA2A;EFNA1;ERBB3;EREG;PTK2B;FGF7;ARL2BP;GAS6;HCLS1;HES1;IGF1;IL6ST;IL18;ITGA5;AREG;LEP;LIF;ARRB2;MIF;NEDD9;OSM;ENPP2;PARP14;RELN;PTPN1;PTPRC;CCL5;TGFB1;TNF;TNFRSF1A;VEGFA;PLPP3;NRP1;ARHGEF2;CD36;CD44;CD74;CD81	3.42995	8.83e-10
GOBP_RENAL_TUBULE_DEVELOPMENT	CD24;COL4A1;OSR1;CTNNB1;JAG1;AGTR2;GPC3;HOXB7;HES1;ILK;LAMA5;LIF;TACSTD2;MYC;PBX1;WNT4;AHI1;LGR4;PTCH1;BCL2;SOX9;HNF1B;VEGFA;PAX8;IRX3;LGR5;PROM1	4.90879	8.89e-10
GOBP_DEVELOPMENTAL_GROWTH_INVOLVED_IN_MORPHOGENESIS	SPRY1;SEMA6B;SEMA3C;KDM5B;CRABP2;CTNNB1;DPYSL2;EDN1;EDNRA;CTTN;C9orf72;ESR1;ALCAM;COBL;FN1;MACF1;GOLGA4;HSP90AA1;HSP90AB1;IFRD1;APOE;ITGB1;AREG;MAP1B;SEMA3G;RTN4;SHTN1;PTPRS;CXCL12;SFRP1;SFRP2;SLIT3;SOX9;SPP1;HNF1B;VCL;VEGFA;DDR1;CXCR4;SEMA3B;NRP1;SEMA5A;SPAG9;SPAG6;CDH1	3.14275	8.97e-10
GOBP_DE_NOVO_PROTEIN_FOLDING	PTGES3;HSPH1;DNAJB4;FKBP1A;SDF2L1;HSPA1A;HSPA1B;HSPA5;HSPA6;HSPA8;HSPA9;HSPD1;HSPE1;DNAJB1;DNAJB13;ST13;CD74	9.25332	9.04e-10
GOBP_REGULATION_OF_PROTEIN_BINDING	CDKN1A;STUB1;RACK1;SPON1;PARK7;CARD16;CTHRC1;EFHB;CTSZ;ADRB3;DAB2;TLE5;FKBP1A;MAPRE3;DKK1;SPAG8;GAS8;ANXA2;HSP90AB1;ID1;APOE;IL10;LRP1;LRPAP1;ARRB2;ATP2A2;PPP1CA;B2M;PTPRF;RAN;ACTB;ROCK1;RPL11;SLPI;SORL1;STK4;TMBIM6;PHLDA2;CAV1;NRP1;CDC42	3.36241	9.06e-10
GOBP_ZYMOGEN_ACTIVATION	OMA1;CTSH;CTSL;CTSZ;ENO1;PYCARD;ANXA2;HP;IFI16;MMP14;SERPINE1;PGK1;PLAT;PLAUR;CYCS;LGMN;S100A10;PERP;VSIR;THBD;THBS1;C1R	6.25423	9.08e-10
GOBP_ORGANIC_ACID_BIOSYNTHETIC_PROCESS	AASS;AKR1A1;PTGES3;PARK7;MGLL;CRABP2;EDN1;ALDH1A1;FABP5;ALDH1A3;SEPHS2;ALOX12;ALOX5AP;SERINC5;PHGDH;GLS;GLUL;GPX4;PYCARD;GSTP1;PYCR2;ANXA1;APOC1;IL1B;IDO1;INSIG1;LPL;MGST2;MGST3;MIF;ASL;MTHFD2L;NDUFAB1;PCBD1;PDK4;PLA2G5;PLOD2;PLP1;ADI1;PTGDS;PTGIS;PTGS2;RBP1;SCD;SCP2;STAR;TBXAS1;UGDH;XBP1;DEGS1;KMO;AKR1C3;ALDH1A2;KYNU;QKI;CD74	2.71727	1e-09
GOBP_POSITIVE_REGULATION_OF_LIPID_LOCALIZATION	ABCA8;EHD1;OSBPL11;PLIN2;DAB2;DBI;EDN1;ACSL1;PRELID1;GPS2;ANXA2;APOE;IL1A;IL1B;LPL;LRP1;MIF;NFKB1;NFKBIA;ACSL5;PLTP;MAP2K6;PTCH1;SCP2;SPP1;TMF1;C3;CAV1;CD36	4.52088	1.03e-09
GOBP_CHAPERONE_COFACTOR_DEPENDENT_PROTEIN_REFOLDING	PTGES3;HSPH1;DNAJB4;SDF2L1;HSPA1A;HSPA1B;HSPA5;HSPA6;HSPA8;HSPA9;HSPE1;DNAJB1;DNAJB13;ST13;CD74	11.5202	1.09e-09
GOBP_REGULATION_OF_RESPONSE_TO_CYTOKINE_STIMULUS	CD24;IRAK3;CARD16;TLE5;ECM1;EDN1;HIPK1;SAMHD1;GAS6;GPS2;PYCARD;GSTP1;HIF1A;HSPA1A;HSPA1B;IL1R1;IL1RN;IRAK1;IRAK2;PARP14;TRIM44;AXL;PTPN1;PTPRC;CCL5;SLIT3;TLR2;TNFAIP3;TNFRSF1A;LAPTM5;PXDN;IL1R2;CXCR4;SPPL2A;CAV1;SPHK1;KLF4;CD74	3.53451	1.13e-09
GOBP_SPERMATID_DIFFERENTIATION	CIB1;PACRG;CFAP54;CFAP206;DEFB1;SPAG17;CFAP221;CFAP65;CATSPERD;TSSK4;CFAP157;CFAP47;IFT81;HMGB2;NPHP1;PAEP;HOOK1;MNS1;STRBP;CFAP44;PTCH1;NECTIN2;RFX2;TMF1;UBE2B;SPAG16;CFAP69;SPEF2;TTC26;CFAP43;SLIRP;NME5;ROPN1L;RSPH1;RNF8;TPGS1;TRIP13;QKI;SPAG6;REC8	3.38553	1.21e-09
GOBP_APPENDAGE_MORPHOGENESIS	SEMA3C;OSR2;COL3A1;OSR1;CRABP2;CTNNB1;DLX5;DKK1;RPGRIP1L;B9D1;INTU;GPC3;HOXA10;IHH;MBNL1;MSX1;MSX2;PBX1;MAP3K20;PRRX1;PTCH1;SFRP2;SOX4;SOX9;TBX3;TWIST1;ZBTB16;TMEM231;DYNC2H1;TMEM107;ALDH1A2;PKDCC;HAND2	3.96767	1.22e-09
GOBP_RESPONSE_TO_ESTROGEN	CD24;ARPC1B;CITED2;SLC34A2;CTNNA1;CITED4;ESR1;GATA6;GSTM3;HOXA10;HSP90AA1;IGFBP2;AR;KRT19;MME;MMP2;MMP14;SERPINB9;CCND1;SFRP1;NCOA4;CAV1	6.12158	1.24e-09
GOBP_REGULATION_OF_CELL_SUBSTRATE_JUNCTION_ORGANIZATION	FERMT2;COL16A1;MACF1;LAMTOR2;APOD;RHOA;LIMS1;MMP14;PIK3R1;WNT4;RAC1;ROCK1;S100A10;SDC4;SFRP1;THBS1;THY1;TLN1;ACTG1;VCL;VEGFA;NRP1	6.12158	1.24e-09
GOBP_CELLULAR_RESPONSE_TO_IONIZING_RADIATION	TANK;CDKN1A;NET1;CRYAB;CYBA;GADD45A;EEF1D;EGR1;XRCC6;GRB2;HSPA5;IFI16;RHOB;GTF2H5;MDM2;MGMT;MAP3K20;RPL26;SFRP1;SFRP2;NUCKS1;SNAI2;CCND2	5.78469	1.25e-09
GOBP_REGULATION_OF_PROTEIN_LOCALIZATION_TO_NUCLEUS	LAMTOR5;FERMT2;PKIG;PARK7;CTNNA1;FLNA;CD2AP;TMEM98;GLUL;HCLS1;HSP90AA1;HSP90AB1;APOD;JUP;LEP;LIF;LMNA;NPM1;PIK3R1;PTGS2;RAN;TCP1;TFRC;TGFB1;CCT3;SUMO1;RASSF5;CCT6A;EIF2AK3;CD36;BAG3;CDH1	4.07071	1.27e-09
GOBP_CHONDROCYTE_DIFFERENTIATION	OSR2;COL3A1;COL11A1;OSR1;COMP;CCN2;CTNNB1;ECM1;EFEMP1;SULF1;HIF1A;IHH;MAF;MDK;MSX2;NFIB;POR;IFT80;SFRP2;BMPR1B;SNAI2;SOX9;TGFB1;TGFBI;ZBTB16;COL27A1;SERPINH1;PKDCC;EIF2AK3	4.4676	1.29e-09
GOBP_RESPONSE_TO_ORGANOPHOSPHORUS	AKAP9;COL1A1;CYP1B1;AHR;PTK2B;FOS;FOSB;GATA6;GPD1;RAPGEF1;APEX1;HSPA5;IGFBP5;IL1B;AQP9;AREG;KCNE1;NT5E;PER1;PLAT;PTGS2;RAP1A;RAP1B;RPLP0;SOD1;ZFP36L1;STC1;BSG;THBD;HSP90B1;EZR	4.18657	1.3e-09
GOBP_REGULATION_OF_KERATINOCYTE_PROLIFERATION	LRG1;FGF7;IFT172;INTU;SFN;IRF6;AREG;MDK;IFT57;PTCH1;IFT80;SNAI2;ZFP36L1;KLF9;ZEB1;TGM1;ZFP36;IFT74	8.10969	1.36e-09
GOBP_CELLULAR_RESPONSE_TO_INORGANIC_SUBSTANCE	PPIF;RASGRP2;CYBB;DAXX;NQO1;EDN1;ENDOG;FOXO1;FOS;FOSB;ALOX5AP;CLIC4;ANK3;SLC25A24;SLC40A1;HSPA5;JUN;JUNB;JUND;MT1E;MT1F;MT1G;MT1H;MT1M;MT1X;MT2A;NFE2L2;ATP5F1A;SERPINF1;LGMN;B2M;PTGS2;SLC1A1;SOD1;TSPO;SUMO1;CALR;MAP1LC3A;AKR1C3;CFLAR;CLDN1;EIF2AK3;EIF4A3;CDH1	3.13899	1.41e-09
GOBP_EMBRYONIC_PLACENTA_DEVELOPMENT	DNAJB6;CITED2;CEBPB;SPINT2;TMED2;ADM;GATA2;GRB2;HIF1A;HES1;CCN1;RBPJ;IL10;JUNB;KRT19;LIF;MAP2K1;PRDM1;SPINT1;ZFP36L1;STK4;NR2F2;PHLDA2;WNT2;SOCS3	5.19224	1.45e-09
GOBP_P38MAPK_CASCADE	GADD45G;GADD45A;DUSP1;PRMT1;IL1B;LEP;MAP3K5;GADD45B;MAP3K20;PER1;ULK4;MAP2K3;MAP2K6;SPI1;ZFP36L1;VEGFA;EZR;ZFP36;SPHK1;HAND2	6.87949	1.47e-09
GOBP_MUSCLE_CELL_MIGRATION	ARPC5;TRIB1;NET1;CYP1B1;AIF1;ANXA1;APEX1;IGF1;IGFBP3;IGFBP5;RHOA;LRP1;MDK;NFE2L2;DDR2;SERPINE1;PLAT;BCL2;ROCK1;S100A11;CCL5;SORL1;TPM1;DDR1;DOCK5;NR4A3;NRP1;ADAMTS1	4.58218	1.54e-09
GOBP_RESPONSE_TO_ETHANOL	ACTR2;ADCYAP1R1;CLDN3;CLDN7;CTSK;CYBB;NQO1;EPS8;PTK2B;FOS;RHOA;LEP;MGMT;MT-ND4;RPL10A;ATP5F1A;CCND1;RGS2;RGS4;RPL15;RPS4X;S100A8;SOD1;SOD2;TBXAS1;TNF;TUFM;VCAM1;CAT;CLDN1;CD14	4.14378	1.6e-09
GOBP_NEGATIVE_REGULATION_OF_ION_TRANSMEMBRANE_TRANSPORT	MRLN;PPIF;ARL6IP5;CLIC2;SLC43A2;OSR1;ADRA2A;FKBP1A;GEM;ANK3;KCNE1;C4orf3;BCL2;RGS2;RGS4;RRAD;SRI;TMBIM6;TNF;TWIST1;SUMO1;VDAC1;YWHAE;SLC30A1;CALM1;CALM2;CAV1;SESTD1;SLC9A3R1	4.41557	1.6e-09
GOBP_NEGATIVE_REGULATION_OF_IMMUNE_EFFECTOR_PROCESS	FGL2;IRAK3;CD55;AHR;A2M;FOXJ1;GRN;ANXA1;HLA-A;HLA-B;HLA-E;IL7R;IL10;LGALS3;ARRB2;CD46;SERPINB9;AXL;PTPRC;RPS19;SPI1;BST2;TMBIM6;TGFB1;SERPING1;TNF;C4BPA;TWIST1;CD47;CD59	4.27078	1.62e-09
GOBP_RECEPTOR_INTERNALIZATION	RAMP1;RAB31;AP2M1;ADM;FCER1G;DKK1;ARC;GRB2;ANXA2;CXCL8;INSR;ITGB1;ITGB2;ARF1;LRP1;LRPAP1;ARRB2;AHI1;SDCBP;SFRP4;TFRC;VEGFA;EZR;WDR54;CAV1;NUMB;CD9;CD36;CD63;CD81	4.27078	1.62e-09
GOBP_COLLAGEN_FIBRIL_ORGANIZATION	COL1A1;COL1A2;COL3A1;COL5A1;COL5A2;COL11A1;COL12A1;COMP;CYP1B1;AEBP1;DPT;EFEMP2;ANXA2;LUM;MMP11;DDR2;SFRP2;TNXB;COL14A1;PXDN;SERPINH1	6.38484	1.63e-09
GOBP_RIBOSOMAL_LARGE_SUBUNIT_BIOGENESIS	NSA2;RPL35;NOP53;RPL10A;SNU13;NPM1;RPL26L1;RSL24D1;MRPL20;NHP2;RPL5;RPL6;RPL7;RPL7A;RPL10;RPL11;RPL23A;RPL24;RPL26;RPL35A;RPL38;RPLP0;RPL14	5.6756	1.67e-09
GOBP_RESPONSE_TO_COLD	CIRBP;ADM;ADRB3;DIO2;FOXO1;FOS;GMPR;HSP90AA1;HSPD1;LPL;MT-CO2;NFKBIA;ATP2B1;PLIN1;SOD2;UCP2;LRP11;EIF2AK3;ZNF516	7.30275	1.77e-09
GOBP_POSITIVE_REGULATION_OF_FIBROBLAST_PROLIFERATION	CDKN1A;EREG;ESR1;FN1;FOSL2;GAS6;IGF1;JUN;LIF;MIF;MYC;DDR2;PDGFRA;BRK1;CD248;S100A6;WNT2;SPHK1;CD74	7.30275	1.77e-09
GOBP_POSITIVE_REGULATION_OF_WNT_SIGNALING_PATHWAY	COL1A1;DAB2;DDX3X;DLX5;DKK1;SULF1;MACF1;ATP6V1C2;GPC3;RBPJ;ILK;JUP;NFKB1;ATP6V0C;USP47;LGR4;VPS35;RPS12;SFRP1;SFRP2;SFRP4;SOX4;TGFB1;TLR2;TNFAIP3;UBE2B;TTC21B;WLS;LGR5;CAV1;RUVBL1;SEMA5A;ZEB2	3.89515	1.78e-09
GOBP_POSITIVE_REGULATION_OF_LYMPHOCYTE_DIFFERENTIATION	LILRB2;NLRP3;EGR3;ZBTB1;FOXO3;XRCC6;GAS6;ANXA1;HLA-DRA;HLA-DRB1;IHH;IL7R;IL10;IL18;RHOA;CD46;MDK;MMP14;PNP;AXL;PTPRC;ACTB;VSIR;NFKBIZ;SMARCE1;SOX4;XBP1;ZBTB16;NFKBID;CD83;CD74	4.10187	1.95e-09
GOBP_POSITIVE_REGULATION_OF_CELL_GROWTH	CIB1;DNPH1;MTPN;CRABP2;CYBA;DDX3X;EDN1;EIF4G2;PTK2B;FN1;MACF1;GOLGA4;SFN;IGF1;IGFBP1;RHOA;KRT17;MAP1B;MMP14;USP47;SHTN1;BCL2;S100A8;S100A9;SDCBP;CXCL12;SFRP1;SFRP2;VEGFA;CXCR4;SLC44A4;MFSD2A;NRP1;SPHK1;SEMA5A;CDC42	3.60263	1.97e-09
GOBP_REGULATION_OF_INTRINSIC_APOPTOTIC_SIGNALING_PATHWAY_IN_RESPONSE_TO_DNA_DAMAGE	CLU;HNRNPK;MIF;MUC1;USP47;BCL2;RPL26;RPS3;BID;CXCL12;SFRP2;SKIL;SNAI2;TPT1;CD44;CD74	9.49801	2.16e-09
GOBP_CARBOXYLIC_ACID_TRANSPORT	ARL6IP5;PDPN;GIPC1;SLC16A10;SLC15A4;SLC25A29;SLC51B;SLC43A2;EMB;SLC26A2;EDN1;ARL6IP1;FOLR1;SERINC5;MPC2;GJA1;ANXA1;IL1A;IL1B;AQP9;ITGB1;LEP;LRP2;MIF;PLA2G2A;PLA2G5;SLC38A2;SLC47A1;MAP2K6;PSAP;PTGS2;RGS2;RGS4;SLC1A1;SLC1A7;SLC3A1;SLC3A2;SLC6A6;SLC6A8;SLC7A2;SLC11A1;SLC16A1;TNF;TRH;SLC7A5;KMO;ABCC3;SLC7A7;SLC9A3R1;CD36;SLC23A1	2.8035	2.16e-09
GOBP_ADAPTIVE_THERMOGENESIS	CEBPB;GADD45G;ADAMTS5;OMA1;ADRB3;DIO2;ALDH1A1;FABP5;ACSL1;KDM6B;GJA1;GNAS;SLC25A4;SLC25A5;HNRNPU;ID1;RBPJ;IL18;LAMA4;LCN2;LEP;LEPR;G0S2;LGR4;MAP2K6;PRLR;RHEB;SCD;SORL1;UCP2;VEGFA;CXCR4;CAV1;CD36;ZNF516	3.67003	2.18e-09
GOBP_RNA_PROCESSING	MBNL2;SRRM1;SAP18;NSA2;EMG1;C1D;DDX17;IVNS1ABP;CELF2;AHCYL1;PAPOLA;HNRNPA0;DDX52;RPL35;BUD23;CIRBP;CLK1;PIH1D2;CLNS1A;SNHG29;DDX3X;DDX5;ERN1;ESR1;HNRNPA3;TUT4;SF3B1;SRRM2;LSM5;FUS;LSM4;SYF2;INTS6;PABPC1;LSM1;LSM3;RBMX;H19;DCPS;TRA2A;NOP53;DNTTIP2;HNRNPA1;HNRNPA2B1;HNRNPC;HNRNPF;HNRNPH1;HNRNPH2;HNRNPH3;HNRNPK;HNRNPU;PRMT1;HSPA1A;HSPA8;IK;ISG20;LGALS3;GTF2H5;MBNL1;NCL;RPL10A;SNU13;NPM1;YBX1;PA2G4;S…	1.71273	2.21e-09
GOBP_LYMPHOCYTE_ACTIVATION_INVOLVED_IN_IMMUNE_RESPONSE	FGL2;CORO1A;NLRP3;SLC15A4;GPR183;GAPT;PTK2B;FCER1G;TMEM98;CLEC4E;ANXA1;HLA-DMB;HLA-DRA;HLA-DRB1;HMGB1;HSPD1;ICAM1;IRF8;IL10;IL18;JUNB;LCP1;LGALS1;LGALS3;CD46;MDK;POU2AF1;PTPRC;RPS6;NFKBIZ;SLC11A1;SPI1;STAT3;TFRC;TGFB1;XBP1;NFKBID;RNF8;ITM2A;CD74;CD81	3.22092	2.63e-09
GOBP_REGULATION_OF_STRIATED_MUSCLE_CONTRACTION	AKAP9;CHGA;C12orf57;CLIC2;CCN2;DSG2;DSP;GATA4;GJA5;RANGRF;NR4A1;HSP90AA1;JUP;ATP1A1;ATP1B1;ATP2A2;PDE4B;PKP2;RGS2;SCN4A;SRI;STC1;SUMO1;CALM1;CALM2;CAV1	4.79213	2.71e-09
GOBP_CARDIAC_MUSCLE_CONTRACTION	AKAP9;CHGA;CLIC2;CCN2;DSG2;DSP;FLNA;GATA4;GJA1;GJA5;RANGRF;GSN;HSP90AA1;JUP;KCNE1;SMAD5;ATP1A1;ATP1B1;ATP2A2;PDE4B;PKP2;MAP2K3;MAP2K6;RGS2;SRI;STC1;TPM1;SUMO1;CXCR4;CALM1;CALM2;CAV1	3.91739	2.76e-09
GOBP_MUSCLE_HYPERTROPHY	PDLIM5;AKAP13;MTPN;CYBA;EDN1;PI16;FOXO1;GATA4;GATA6;LMCD1;IGF1;IGFBP5;IL6ST;JARID2;LEP;LMNA;ATP2A2;ERRFI1;TWF1;RGS2;RGS4;ROCK1;TNFRSF1A;TNFRSF1B;NR4A3;SORBS2;HAND2	4.58952	2.91e-09
GOBP_REGULATION_OF_BIOMINERALIZATION	CEBPB;OSR2;OSR1;COMP;PHOSPHO1;SGMS2;ECM1;PTK2B;GAS6;HIF1A;CCN1;LTF;MGP;ATP2B1;DDR2;WNT4;ASPN;SRGN;TENT5A;PTN;ROCK1;CCL3;BMPR1B;SOX9;TGFB1;TWIST1;PKDCC	4.58952	2.91e-09
GOBP_RRNA_METABOLIC_PROCESS	NSA2;EMG1;C1D;DDX17;DDX52;RPL35;GTF3C6;BUD23;PIH1D2;SLFN13;ANG;CAVIN1;NOP53;ISG20;GTF2H5;NCL;RPL10A;SNU13;PA2G4;SBDS;TRMT112;PIN4;NOP10;NHP2;RPL5;RPL7;RPL7A;RPL11;RPL26;RPL27;RPL35A;RPS6;RPS7;RPS8;RPS14;RPS15;RPS16;RPS17;RPS19;RPS21;RPS24;RPS25;RPS27;RPS28;TRIR;RPL14;DDX21;EIF4A3	2.87844	3.01e-09
GOBP_NEGATIVE_REGULATION_OF_PROTEIN_CATABOLIC_PROCESS	GIPC1;IRAK3;PARK7;GABARAPL2;CST3;NQO1;FLNA;RYBP;SVIP;NOP53;ANXA2;HMGCR;HSP90AB1;IL10;UBXN1;AZIN1;CTSA;LAPTM4B;VPS35;ROCK1;RPL11;SDCBP;TIMP1;TIMP2;TIMP3;CAMLG;EIF3H;SNX3	4.41629	3.02e-09
GOBP_NEGATIVE_REGULATION_OF_CELL_PROJECTION_ORGANIZATION	SEMA6B;SEMA3C;CIB1;RAB3IP;DAB2;DPYSL3;EFNA1;DKK1;FLNA;DENND5A;MYLIP;HES1;ID1;IFRD1;APOE;ITGA3;RHOA;TACSTD2;MAP4;MBP;PFN2;PLXNB3;PMP22;B2M;SEMA3G;RTN4;ODF2L;PTPRS;CCL21;SPP1;NR2F1;THY1;VIM;YWHAH;SEMA3B;NRP1;SEMA5A;CCP110;CDH1	3.32133	3.05e-09
GOBP_AMINE_METABOLIC_PROCESS	INMT;PARK7;COMT;MTPN;EDNRA;ALDH2;SLC44A1;PNKD;AMD1;GCH1;HNMT;IDO1;ITGAM;ITGB2;MAOA;NNMT;NR4A2;OAZ1;AZIN1;VPS35;SAT1;SLC1A1;SRM;TRH;VCAM1;KMO;KYNU;SLC7A7;HAND2	4.26651	3.05e-09
GOBP_POSITIVE_REGULATION_OF_FAT_CELL_DIFFERENTIATION	CDS1;CEBPB;ADIRF;CCDC71L;AAMDC;HNRNPU;ID2;LPL;PIM1;PTGS2;RARRES2;SFRP1;SFRP2;SNAI2;ZFP36L1;STK4;KLF5;XBP1;ZFP36;ZBTB16;MEDAG;SYAP1	5.75299	3.07e-09
GOBP_REGULATION_OF_MEMBRANE_POTENTIAL	AKAP9;RACK1;ARL6IP5;PRDX3;PARK7;CLIC1;IGSF11;CXADR;DCN;DSG2;DSP;EDN1;PTK2B;STOX1;FLNA;GABRP;GJA1;GJA5;PPA2;PRELID1;GCLC;GCLM;GNA15;ANK3;GRIK3;RANGRF;JUP;KCNE1;KIF5B;CHCHD10;ARRB2;NDUFC2;ATP1A1;ATP1B1;ATP1B3;ATP2A2;SHANK1;PKP2;FXYD1;PMAIP1;SLC25A36;RELN;BCL2;RGS4;SCN4A;SCN7A;BID;PIEZO2;SLC39A8;SLC1A7;SOD1;SOD2;SRI;TSPO;TNF;UBB;SUMO1;UCP2;YWHAE;YWHAH;CALM1;BCO2;CAV1;ATP5IF1;CD36;EIF4A3	2.39331	3.33e-09
GOBP_CELLULAR_RESPONSE_TO_INSULIN_STIMULUS	NAMPT;SORBS1;RAB31;FOXO1;DNAI1;GCLC;GNAI2;TRARG1;GRB2;SLC2A8;IGFBP1;APRT;IL1B;INSIG1;INSR;LEP;LPL;NCL;ATP2B1;PDK4;PIK3R1;PKM;ERRFI1;SELENOS;PTPN1;PTPRE;RAB13;RARRES2;RBM4;SRSF5;ZNF106;NUCKS1;SORL1;ZFP36L1;UCP2;XBP1;IRS2;CFLAR;SOCS3;SYAP1;ZNF592	3.18264	3.53e-09
GOBP_POSITIVE_REGULATION_OF_CELL_CYCLE_PROCESS	SMC2;GIPC1;PHB2;CCN2;DDX3X;EDN1;AIF1;EREG;STOX1;PPP1R35;MAPK15;PLCB1;RGCC;ANXA1;HNRNPU;APEX1;IGF1;IL1A;IL1B;INSR;RHOA;MDM2;MSX1;MSX2;NPM1;DDR2;RRM2B;PBX1;ANAPC5;ANAPC11;MAP3K20;PLSCR1;WNT4;PPP1R10;KMT2E;CCND1;SFPQ;TNF;UBE2B;DDX39B;CSPP1;PKP4;RAB11A;SPHK1;CCND2;ADAMTS1;CDC42	2.89727	3.64e-09
GOBP_TOLL_LIKE_RECEPTOR_SIGNALING_PATHWAY	TNIP1;IRAK3;SLC15A4;CTSS;CYBA;DDX3X;ESR1;LY96;GPS2;HMGB1;BIRC3;HSPD1;IRAK1;IRAK2;IRF1;LTF;ARRB2;NFKBIA;NINJ1;LGR4;RTN4;PELI1;S100A14;PTPRS;TLR2;TNF;TNFAIP3;CAV1;CD14;CD36	4.09258	3.68e-09
GOBP_CARDIAC_VENTRICLE_DEVELOPMENT	CITED2;SEMA3C;CNTRL;COL11A1;CPE;JAG1;DSP;EDNRA;ENG;FKBP1A;GATA4;GJA5;HIF1A;HES1;CCN1;RBPJ;LRP2;MDM2;PKP2;HEG1;PRDM1;SFRP2;SLIT3;SOX4;TBX3;TGFB1;TPM1;PAX8;HAND2;MATR3	4.09258	3.68e-09
GOBP_SECOND_MESSENGER_MEDIATED_SIGNALING	CIB1;RCAN3;ADCYAP1R1;CLIC2;ADM;EFHB;DEFB1;RCAN1;AGTR2;EDN1;EDNRB;AHR;ERBB3;PTK2B;DDAH2;FPR1;DDAH1;NR5A1;GBP1;GUCY1A2;LMCD1;HINT1;IGF1;APOE;CXCL8;ATP1B1;ATP2A2;FIS1;TMBIM4;RASD1;PLEK;PPP1R9A;PTPRC;SELENOK;CCL3;CCL4;CCL20;CLEC7A;SOX9;THBS1;TNF;UBE2B;VCAM1;VEGFA;CXCR4;CALM1;CALM2;SPHK1;CCRL2;JPT2;EIF2AK3;HOMER2;CD36	2.68903	3.7e-09
GOBP_REGULATION_OF_RESPONSE_TO_DNA_DAMAGE_STIMULUS	ACTR2;RUVBL2;MORF4L1;CLU;DDX5;ENDOG;EYA2;FUS;HIC1;HMGB1;HNRNPK;MCL1;MDM2;MGMT;MIF;MSX1;MUC1;MYC;NPM1;MAP3K20;PMAIP1;USP47;PPP1R10;PPP4R3B;RBBP8;BCL2;ACTB;RPL26;RPS3;BID;CXCL12;SFRP2;MEAF6;SKIL;SNAI2;SMARCE1;SOX4;TPT1;TWIST1;UBE2V1;WAS;PTTG1IP;DEK;DDX39B;FXR1;SF3B5;RUVBL1;IER3;RNF8;EEF1E1;CD44;MORF4L2;CD74	2.68903	3.7e-09
GOBP_REGULATION_OF_STEM_CELL_PROLIFERATION	N4BP2L2;FERMT2;OSR2;CTNNB1;FBLN1;GJA1;SFN;HMGB2;HNRNPU;ID4;RBPJ;IRF6;EPCAM;NFIB;PBX1;PIM1;PRRX1;PTCH1;PTPRC;SOX17;SNAI2;SOX9;ZFP36L1;TBX3;IRS2	4.8818	4e-09
GOBP_POSITIVE_REGULATION_OF_NIK_NF_KAPPAB_SIGNALING	PHB2;DDX3X;EDN1;PDCD4;IL1B;IL18;ILK;IRAK1;RHOA;LIMS1;TRIM44;C20orf27;TCIM;RPS3;TLR2;TNF;LAPTM5;ACTN4;CALR;SPHK1;CD14	5.96704	4.17e-09
GOBP_FACE_MORPHOGENESIS	COL1A1;DLX5;DKK1;TIPARP;ANKRD11;MMP2;MSX1;PDGFRA;PLEKHA1;RRAS;CSRNP1;CRISPLD1;CRISPLD2;ARID5B	11.4208	4.25e-09
GOBP_NCRNA_METABOLIC_PROCESS	NSA2;EMG1;C1D;DDX17;KCNQ1OT1;DDX52;RPL35;GTF3C6;BUD23;PIH1D2;SLFN13;DDX3X;DDX5;EGR1;ESR1;ELL2;FOXO3;TUT4;FOS;GATA2;GATA6;INTS6;ANG;H19;CAVIN1;NOP53;HIF1A;HNRNPA2B1;IL10;ISG20;JUN;GTF2H5;MYC;NCL;RPL10A;NFIB;NFKB1;SNU13;PA2G4;SBDS;TRMT112;RTRAF;PIN4;POLR2L;ELP3;DALRD3;INTS10;NOP10;NHP2;MAP2K1;MAP2K2;TRMT9B;GAS5;RPL5;RPL7;RPL7A;RPL11;RPL26;RPL27;RPL35A;RPS6;RPS7;RPS8;RPS14;RPS15;RPS16;RPS17;RPS19;RP…	2.09462	4.26e-09
GOBP_CHEMOKINE_PRODUCTION	CSF1R;DDX3X;EGR1;EPHA2;AIF1;PYCARD;GSTP1;HIF1A;HMGB1;APOD;IL1B;IL10;IL18;ARG2;LPL;MBP;MIF;TREM1;SELENOK;CLEC7A;SNAI2;TLR2;TNF;TWIST1;KLF4;CD74	4.66063	4.35e-09
GOBP_POSITIVE_REGULATION_OF_INTERLEUKIN_6_PRODUCTION	LILRB2;SPON2;CYBA;AIF1;EREG;ZBTB20;PYCARD;HMGB1;HSPD1;IL1A;IL1B;LEP;LPL;MBP;POU2AF1;SELENOK;CLEC7A;STAT3;TLR2;TNF;TWIST1;TYROBP;XBP1;ARHGEF2;CD36;CD74	4.66063	4.35e-09
GOBP_T_CELL_MEDIATED_IMMUNITY	CTSC;NLRP3;CTSH;CD55;JAG1;AHR;ZBTB1;CADM1;HLA-A;HLA-B;HLA-DRA;HLA-DRB1;HLA-E;HMGB1;HSPD1;ICAM1;IL1B;IL1R1;IL7R;IL18;CD46;B2M;PTPRC;NECTIN2;MYO1G;TNFRSF1B;WAS;CD81	4.31223	4.65e-09
GOBP_VACUOLE_ORGANIZATION	CORO1A;GABARAP;GABARAPL2;CTSD;C9orf72;GABARAPL1;NUPR1;CHMP2A;GRN;CHMP4A;ANXA2;RNASEK;MAP1LC3C;ATP2A2;SH3GLB1;HOOK1;ATP6V1D;CHMP5;ATP6V1A;ATP6V0C;PLA2G5;ATP6V0B;ARL8B;LAPTM4B;PPT1;VPS35;TMEM165;WDR45B;CHMP1B;LAPTM5;ATG9A;IFT88;MAP1LC3B;VMP1;EMC6;RAB34;SRPX;MAP1LC3A;MBTPS1;ATP6V1F;BAG3	3.14526	4.71e-09
GOBP_MAINTENANCE_OF_BLOOD_BRAIN_BARRIER	CLDN3;GJA1;ITGB1;MBP;F11R;PTGS2;ACTB;SLC1A1;TJP1;ACTG1;VCL;VEGFA;MFSD2A;CLDN1;TJP2	9.792	5.11e-09
GOBP_KERATINOCYTE_PROLIFERATION	LRG1;EREG;FGF7;IFT172;INTU;SFN;IRF6;AREG;MDK;IFT57;PTCH1;IFT80;SNAI2;ZFP36L1;KLF9;ZEB1;TGM1;ZFP36;IFT74	6.71015	5.13e-09
GOBP_CYTOPLASMIC_TRANSLATIONAL_INITIATION	EIF3M;EIF4A1;EIF4A2;EIF4B;EIF5;RPL13A;EIF3K;EIF3E;EIF3L;RBM4;EIF3A;EIF3D;EIF3F;EIF3G;EIF3H;EIF2S2	8.70609	5.31e-09
GOBP_REGULATION_OF_ACTIN_FILAMENT_BASED_MOVEMENT	AKAP9;PDPN;DSG2;DSP;GATA4;GJA5;RANGRF;JUP;ATP2A2;PDE4B;PKP2;ACTA2;SRI;STC1;SUMO1;CAV1	8.70609	5.31e-09
GOBP_POSITIVE_REGULATION_OF_ACTIN_FILAMENT_BUNDLE_ASSEMBLY	FERMT2;SYNPO;CCN2;RGCC;ID1;RHOA;RHOC;PFN1;PFN2;PLEK;WNT4;CCDC88A;RAC1;S100A10;SDC4;SFRP1;TPM1;NRP1;CD47;CDC42	6.22372	5.54e-09
GOBP_MESENCHYMAL_CELL_MIGRATION	CDH2;SEMA6B;SEMA3C;EDN1;EDNRA;EDNRB;ENG;FN1;FOLR1;HIF1A;LAMA5;SEMA3G;PHACTR4;SOX10;TWIST1;SEMA3B;NRP1;SEMA5A;HAND2;CDC42	6.22372	5.54e-09
GOBP_REGULATION_OF_CELL_DIVISION	CDK2AP2;RACK1;CIB1;TXNIP;CETN2;GIPC1;EFHC1;PLK3;EREG;EVI2B;FGF7;INTU;SFN;DCDC1;IL1A;IL1B;RHOA;MDK;MYC;YBX1;OSM;SH3GLB1;PTCH1;PTN;SFRP2;SOX17;TGFB1;VEGFA;CSPP1;MAP9;CALM1;CALM2;LBH;CAT;PKP4;RAB11A;CCP110;CDC42	3.29963	5.58e-09
GOBP_CYTOKINE_PRODUCTION_INVOLVED_IN_IMMUNE_RESPONSE	SPON2;IRAK3;NLRP3;CD55;PYCARD;HLA-A;HLA-E;IL1B;IL1R1;IL10;IL18;MIF;TREM1;AXL;B2M;CLEC7A;BST2;TGFB1;TNF;TNFRSF1B;TWIST1;LAPTM5;NR4A3;SLC7A5;DDX21;CD36;LITAF;CD74;CD81	4.12719	5.66e-09
GOBP_LYMPHOCYTE_MIGRATION	CXCL13;CORO1A;GPR183;ECM1;AIF1;PTK2B;GAS6;ABL2;PYCARD;ICAM1;APOD;RHOA;CD99;MSN;NEDD9;F11R;CKLF;SELENOK;SAA1;CCL2;CCL3;CCL3L1;CCL4;CCL5;CCL20;CCL21;CXCL12;MYO1G;CH25H	4.12719	5.66e-09
GOBP_ARTERY_DEVELOPMENT	CITED2;CNTRL;ADAMTS6;COL3A1;COMP;JAG1;EDN1;EDNRA;ENG;FOLR1;GJA5;EFEMP2;HES1;APOE;RBPJ;LDLR;LEP;LRP1;LRP2;MDK;PRRX1;ADAMTS9;PRDM1;SOX4;VEGFA;NRP1;HAND2	4.41715	5.7e-09
GOBP_FATTY_ACID_METABOLIC_PROCESS	LYPLA1;ECI2;PTGES3;MGLL;ADH5;CYP1B1;CYP4B1;DBI;ECH1;ECHS1;EDN1;EPHX1;ETFB;FABP5;ACSL1;ACSL3;ACSL4;PTGR1;ALOX12;ALOX5AP;GPX4;GSTP1;ANXA1;AOAH;APOC1;IL1B;INSIG1;LEP;LPL;ASAH1;MIF;NDUFAB1;PAM;PCCA;AIG1;PDK4;ACSL5;PLA2G5;PLP1;POR;PTGDS;PTGIS;PTGS2;SCD;SCP2;SOX9;TBXAS1;TNFRSF1A;TNXB;C3;TWIST1;XBP1;NR4A3;ALKBH7;MFSD2A;DEGS1;CAV1;AKR1C3;IRS2;QKI;CD36;CD74	2.42736	6.06e-09
GOBP_CELL_FATE_COMMITMENT	PDPN;CTNNB1;CTSL;ARX;JAG1;EDN1;EDNRA;ETS2;EYA2;DKK1;KDM6B;SPDEF;GAS1;GATA2;GATA4;GATA6;HES1;ID2;IFRD1;RBPJ;IHH;AR;ITGB1;RHOA;SMAD5;MCL1;MITF;PRRX1;WNT4;PTCH1;RBBP4;RBBP7;BCL2;PRDM1;SFRP1;SFRP2;SOX17;SOX9;STAT3;TBX3;HNF1B;NR2F2;TGFB1I1;TNXB;WNT2;NRP1;ARHGEF2;KLF4;CDC42	2.76159	6.62e-09
GOBP_CAMERA_TYPE_EYE_MORPHOGENESIS	CITED2;C12orf57;COL8A1;CTNNB1;JAG1;EPHA2;HIPK1;ALDH1A3;RPGRIP1L;TSPAN12;IFT172;CRB2;HIF1A;HMGN1;IHH;AHI1;RORB;RP1;SLC1A1;PHACTR4;SOX9;STAT3;ZEB1;THY1;TWIST1;VEGFA;WNT2;MFSD2A;PROM1;IGFN1	3.96841	6.63e-09
GOBP_MONOSACCHARIDE_METABOLIC_PROCESS	TSTD1;AKR1A1;FAM3C;SORBS1;OMA1;ENO1;FABP5;FOXO1;FUCA1;GAPDH;B4GALT1;SERP1;GCLC;GPD1;PGP;APOD;IGF1;IGFBP3;IGFBP4;INSR;LEP;LEPR;MDH2;MST1;ATF3;NNMT;PDK4;PFKFB3;PFKL;PGK1;PKM;PMAIP1;SELENOS;SDHAF3;PPP4R3B;RANBP2;SLC2A1;SLC2A3;SORD;TFF3;TNF;TPI1;IRS2;MIDN;SLC23A1	2.90945	6.87e-09
GOBP_POSITIVE_REGULATION_OF_PROTEIN_LOCALIZATION_TO_MEMBRANE	RACK1;CIB1;AGR2;SORBS1;SLC51B;EPHA2;ACSL3;ANK3;RANGRF;ITGA3;ITGAM;ITGB1;ITGB2;KIF5B;LGALS3;LRP1;FIS1;PIK3R1;SLC5A3;SPTBN1;TNF;TNFAIP6;EZR;SQSTM1;PDCD5;CD81	4.53616	6.89e-09
GOBP_AXON_EXTENSION	SEMA6B;SEMA3C;DPYSL2;EDN1;EDNRA;CTTN;C9orf72;ALCAM;FN1;MACF1;GOLGA4;HSP90AA1;HSP90AB1;IFRD1;APOE;ITGB1;MAP1B;SEMA3G;RTN4;SHTN1;PTPRS;CXCL12;SLIT3;VCL;VEGFA;SEMA3B;NRP1;SEMA5A;CDH1	4.08276	6.92e-09
GOBP_REGULATION_OF_OXIDOREDUCTASE_ACTIVITY	COX17;PARK7;PHB2;CYBA;AGTR2;EDN1;PTK2B;DDAH2;DDAH1;GCH1;ABL2;GLA;GNAI2;H19;HIF1A;HP;APOE;IL1A;IL1B;LEP;NDUFA4;NFKB1;POR;S100A1;TNF;HM13;CAV1	4.36254	7.08e-09
GOBP_REGULATION_OF_ORGANIC_ACID_TRANSPORT	ARL6IP5;SLC43A2;EDN1;ACSL1;ARL6IP1;IL1A;IL1B;ITGB1;LEP;MIF;FIS1;ACSL5;SLC38A2;MAP2K6;RGS2;RGS4;THBS1;TNF;TRH;SLC7A5;KMO;IRS2	5.42728	7.17e-09
GOBP_PROTEIN_LOCALIZATION_TO_ENDOPLASMIC_RETICULUM	KDELR1;SEC61B;KDELR2;GABARAPL2;TRAM1;SEC61G;PPP1R15A;SPCS1;CHMP4A;SEC61A1;HSPA5;INSIG1;RTN4;SRP9;SRP14;SSR3;BTF3;SEC62;ZFAND2A;VAPA;HERPUD1;SPCS2	5.42728	7.17e-09
GOBP_NEGATIVE_REGULATION_OF_REPRODUCTIVE_PROCESS	PRDX4;DUSP1;SULF1;NR5A1;GJA1;IGF1;IL1A;ARHGDIB;LIF;OVGP1;PAEP;SERPINF1;PLAT;WNT4;PTGDS;SOD1;TIMP1;UBE2B;WDR77;CALR;YBX3;TRIP13	5.42728	7.17e-09
GOBP_POSITIVE_REGULATION_OF_DNA_BINDING	LAMTOR5;PARK7;CTNNB1;HMGB1;HMGB2;HES1;IGF1;NME1;PLAUR;NIBAN2;TGFB1;TWIST1;TXN;CALM1;CALM2;EDF1;KLF4;HAND2;DAZAP2	6.53341	7.18e-09
GOBP_REGULATION_OF_INNATE_IMMUNE_RESPONSE	HEXIM1;IRAK3;SLC15A4;A2M;EREG;FCN1;FGR;CADM1;XRCC6;SAMHD1;GRN;PYCARD;HCK;CFH;HLA-A;HLA-B;HLA-E;HMGB1;HMGB2;BIRC3;HSP90AA1;IFI16;APOE;IRF1;LEP;ARRB2;MNDA;NFE2L2;SERPINB9;PLA2G5;PLSCR1;PARP14;PTPN1;NECTIN2;RPS19;CCL5;SFPQ;CLEC7A;SPI1;SERPING1;TNFAIP3;TYROBP;BANF1;MATR3	2.94594	7.27e-09
GOBP_REGULATION_OF_PROTEIN_SECRETION	ERP29;CHGA;ADRA2A;ACSL4;FOXO1;CD2AP;MPC2;SERP1;GLUL;ANG;HIF1A;HLA-DRB1;HMGCR;ICA1;IGF1;APOE;IL1A;IL1B;LEP;LLGL2;PIM3;MYH10;PAM;PFKL;PPIA;PPID;VPS35;RFX3;SAA1;CCL5;SFRP1;SLC16A1;SOX4;SRI;TGFB1;TLR2;TNF;TRH;UCP2;EZR;WLS;RAB11FIP1;IRS2;MIDN;HMGN3;STXBP5L	2.86184	7.32e-09
GOBP_MAMMARY_GLAND_MORPHOGENESIS	KDM5B;PHB2;CSF1R;EPHA2;ELF3;ESR1;IGFBP5;AR;AREG;MSX2;NFKB1;PGR;WNT4;PTCH1;TBX3;DDR1;CAV1	7.65658	7.39e-09
GOBP_HEAD_MORPHOGENESIS	COL1A1;DLX5;DKK1;TIPARP;ANKRD11;IHH;MMP2;MSX1;PDGFRA;PLEKHA1;RRAS;CSRNP1;CRISPLD1;CRISPLD2;ARID5B	9.32568	8.18e-09
GOBP_SMOOTH_MUSCLE_CELL_MIGRATION	ARPC5;TRIB1;CYP1B1;AIF1;APEX1;IGF1;IGFBP3;IGFBP5;RHOA;LRP1;MDK;NFE2L2;DDR2;SERPINE1;PLAT;BCL2;S100A11;CCL5;SORL1;TPM1;DDR1;DOCK5;NR4A3;NRP1;ADAMTS1	4.67226	8.2e-09
GOBP_REGULATION_OF_BONE_MINERALIZATION	OSR2;OSR1;COMP;PHOSPHO1;SGMS2;ECM1;PTK2B;HIF1A;CCN1;LTF;MGP;ATP2B1;DDR2;WNT4;SRGN;TENT5A;PTN;CCL3;BMPR1B;SOX9;TGFB1;TWIST1;PKDCC	5.09751	8.53e-09
GOBP_NUCLEAR_TRANSPORT	CDKN1A;TXNIP;AHCYL1;PKIG;AKAP13;PARK7;PHB2;FLNA;GAS6;SFN;RANGRF;HCLS1;HNRNPA1;HNRNPA2B1;HSPA9;HSP90AA1;HSP90AB1;IFI27;APOD;IL1B;JUP;LEP;LMNA;NFKBIA;NPM1;PIK3R1;NUP62CL;PPP1R10;PTGS2;RAN;RANBP2;RBM4;RPS15;ATXN1;SRSF3;UPF3A;SSB;STAT3;STK4;TGFB1;TXN;SUMO1;YWHAE;PTTG1IP;DDX39B;PABPN1;CALR;SQSTM1;RPL23;CD36;BAG3;EIF4A3;RBM8A;CDH1	2.58023	9.12e-09
GOBP_REGULATION_OF_MEMBRANE_PERMEABILITY	PDCD6IP;PPIF;CLDN3;EYA2;GCLC;SLC25A4;SLC25A5;SLC25A6;HSPA1A;CHCHD10;F11R;PMAIP1;LAPTM4B;HEG1;BCL2;BID;BNIP3L;VDAC2;LAPTM5;ALKBH7;ATP5IF1;TJP2	5.32597	9.42e-09
GOBP_MEMBRANE_PROTEIN_PROTEOLYSIS	ADRA2A;CTSH;BACE2;RBMX;APOE;IL1B;IL10;MMP7;PSENEN;ROCK1;TGFB1;TIMP1;TIMP2;TIMP3;TNF;TNFRSF1B;HM13;SPPL2A;MBTPS1	6.36574	9.97e-09
GOBP_NEURON_MIGRATION	SDCCAG8;TUBGCP2;COL3A1;CTNNB1;DNAAF4;ARX;EMX2;PHACTR1;PLXNB2;GAS6;GATA2;GFRA3;HSP90AA1;ITGA3;RHOA;MAP1B;MDK;NR4A2;PCM1;DCDC2;DDIT4;ULK4;ELP3;AXL;RELN;SHTN1;RAC1;CXCL12;STAT3;NR2F2;TWIST1;VEGFA;YWHAE;CXCR4;NRP1;ARHGEF2	3.3463	1.01e-08
GOBP_REGULATION_OF_LIPID_LOCALIZATION	ABCA8;KDM5B;EHD1;OSBPL11;PLIN2;DAB2;DBI;EDN1;ACSL1;PRELID1;GPS2;ANXA2;APOC1;APOE;IL1A;IL1B;LEP;LPL;LRP1;MIF;NFKB1;NFKBIA;FIS1;ACSL5;PLTP;MAP2K6;PTCH1;SCP2;SPP1;THBS1;TSPO;TMF1;TNF;C3;CAV1;IRS2;CD36	3.27709	1.02e-08
GOBP_CHRONIC_INFLAMMATORY_RESPONSE	CXCL13;AHCY;IL10;IDO1;S100A8;S100A9;CCL5;THBS1;TNF;TNFAIP3;VCAM1	17.9317	1.07e-08
GOBP_POSITIVE_REGULATION_OF_SECRETION	PDCD6IP;CYBA;DAB2;EDN1;EDNRB;ACSL3;ACSL4;FGR;CD2AP;MPC2;GATA2;SERP1;CHMP2A;GLUL;GNAI2;ANG;RGCC;ANXA2;HIF1A;HLA-DRB1;IGF1;IL1A;IL1B;ITGAM;ITGB2;LEP;MIF;MYH10;PPIA;PPID;VPS35;MAP2K6;S100A8;S100A10;SDC4;SDCBP;CXCL12;SOX4;SPP1;SRI;TGFB1;TLR2;TMF1;TRH;EZR;XBP1;WLS;KMO;IRS2;VAMP8;AIMP1	2.64761	1.11e-08
GOBP_POSITIVE_REGULATION_OF_ENDOTHELIAL_CELL_MIGRATION	PDCD6;CIB1;EDN1;PTK2B;GATA2;GRN;ANXA1;ANXA3;HIF1A;HMGB1;HSPB1;RHOB;MET;NFE2L2;ATP5F1A;ATP5F1B;MAP2K3;LGMN;PTGS2;RAC1;RRAS;SPARC;TGFB1;THBS1;TMSB4X;VEGFA;CALR;PLPP3;NRP1;SEMA5A	3.85066	1.17e-08
GOBP_REGULATION_OF_TUBE_SIZE	KLF2;COMP;ADM;ADRA2A;ADRA2C;ADRB3;AGTR2;EDN1;EDNRA;EDNRB;GCH1;GJA5;GCLC;GCLM;HBB;APOE;RHOA;LEP;MMP2;ATP2B1;PTGS2;ACTA2;SCPEP1;RGS2;ROCK1;SOD1;SOD2;SOD3;TBXAS1;TNF;DOCK5;CAV1	3.64456	1.18e-08
GOBP_CELL_MATURATION	KLF2;CTNNB1;DEFB1;EDN1;EDNRA;EDNRB;EREG;PTK2B;FOXO3;TUT4;MTCH1;CATSPERD;GATA2;ANG;HIF1A;HES1;IHH;KCNE1;RHEX;NR4A2;PAEP;PGR;AXL;NTN4;BCL2;RFX3;CCL21;CLEC7A;BNC1;SOX10;C3;VEGFA;WDR77;ROPN1L;TRIP13;REC8;PTBP3	3.25502	1.19e-08
GOBP_REGULATION_OF_ACTIN_CYTOSKELETON_REORGANIZATION	IQGAP2;CSF1R;PTK2B;CD2AP;ABL2;PHPT1;HCK;HCLS1;ARHGDIB;MDK;F11R;PDGFRA;TJP1;NRP1;GMFG;CDC42	8.03573	1.23e-08
GOBP_RIBOSOMAL_SMALL_SUBUNIT_BIOGENESIS	EMG1;DDX52;RPSA;GTF2H5;SNU13;NPM1;RPS27L;RPL38;RPS5;RPS6;RPS7;RPS8;RPS14;RPS15;RPS16;RPS17;RPS19;RPS21;RPS24;RPS25;RPS27;RPS28	5.22964	1.23e-08
GOBP_RENAL_SYSTEM_PROCESS	MAGED2;ADM;CLDN4;CYBA;AGTR2;EDN1;EDNRA;EDNRB;SULF1;FOLR1;GAS6;GJA5;GNAI2;IGKV3-20;GSN;HBB;IGHA1;IGHA2;AQP3;ITGA3;RHOA;RRM2B;LGMN;BCL2;SGK1;STC1;RHPN2;AKR1C3;SLC9A3R1	3.95503	1.25e-08
GOBP_NEGATIVE_REGULATION_OF_PROTEIN_BINDING	CDKN1A;STUB1;RACK1;PARK7;CARD16;EFHB;CTSZ;ADRB3;DAB2;TLE5;DKK1;ID1;IL10;LRPAP1;ARRB2;ATP2A2;PPP1CA;B2M;PTPRF;ACTB;ROCK1;SLPI;SORL1;TMBIM6;CAV1	4.54228	1.3e-08
GOBP_BONE_MORPHOGENESIS	CITED2;OSR2;COL1A1;COL3A1;COMP;PHOSPHO1;DLX5;IHH;INSIG1;LTF;MMP14;MSX1;MSX2;POR;IFT80;SFRP4;BMPR1B;SOX9;STC1;TWIST1;ATG9A;TMEM107;COL27A1;SERPINH1;DHRS3	4.54228	1.3e-08
GOBP_EMBRYONIC_APPENDAGE_MORPHOGENESIS	OSR2;OSR1;CRABP2;CTNNB1;DLX5;DKK1;RPGRIP1L;B9D1;INTU;GPC3;HOXA10;IHH;MBNL1;MSX1;MSX2;PBX1;MAP3K20;PRRX1;PTCH1;SFRP2;TBX3;TWIST1;ZBTB16;TMEM231;DYNC2H1;TMEM107;ALDH1A2;HAND2	4.07236	1.3e-08
GOBP_PROTEIN_TARGETING_TO_MITOCHONDRION	TOMM6;MTX2;ROMO1;SAMM50;TIMM13;TIMM8B;DNAJC15;HSP90AA1;HSPD1;LMAN1;TOMM5;FIS1;NDUFA13;SH3GLB1;TOMM7;LEPROT;RHOU;RAC2;UBL5;BID;BNIP3L;TSPO;UBE2D3;PDCD5;ATP5IF1;BAG3	4.36145	1.34e-08
GOBP_REGULATION_OF_BIOLOGICAL_PROCESS_INVOLVED_IN_SYMBIOTIC_INTERACTION	IFITM3;IFITM2;FCN1;GSN;HLA-DRB1;HMGB1;CXCL8;LGALS1;LTF;LY6E;P4HB;TMPRSS4;PTX3;NECTIN2;IFITM1;CAV1;SNX3;CH25H;CD74	6.20657	1.37e-08
GOBP_CYTOKINESIS	PDCD6IP;ACTR2;CETN2;CFL1;GIPC1;EFHC1;PLK3;CHMP2A;ANK3;CHMP4A;ANXA11;DCDC1;ARF1;RHOA;RHOB;RHOC;STMN1;ARL3;MYH10;SEPTIN2;SH3GLB1;CHMP5;SEPTIN11;CHMP1B;ROCK1;SON;SPTBN1;CSPP1;MAP9;CALM1;EFHC2;CALM2;PKP4;RAB11A;CCP110;SEPTIN7;CDC42	3.23324	1.38e-08
GOBP_HEART_VALVE_DEVELOPMENT	JAG1;EFNA1;ELN;GATA4;GJA5;CCN1;RBPJ;MDM2;ADAMTS9;ROCK1;PRDM1;SLIT3;SNAI2;SOX4;SOX9;TGFB1;TNFRSF1A;TNFRSF1B;TWIST1;MATR3	5.80792	1.39e-08
GOBP_EMBRYONIC_HEART_TUBE_DEVELOPMENT	CITED2;TMED2;DNAAF1;PIFO;CTNNB1;EDN1;EDNRA;ENG;CLUAP1;FOLR1;IFT172;GATA4;HIF1A;HES1;CCDC39;IHH;AHI1;CCDC40;IFT57;SOX17;TBX3;HAND2;CDC42	4.93053	1.41e-08
GOBP_NEURON_PROJECTION_GUIDANCE	TUBB3;SEMA6B;SEMA3C;EMB;CSF1R;ARX;DLX5;DPYSL2;EDN1;EDNRA;EFNA1;EPHA2;EPHB6;ALCAM;PALLD;PLXNB2;GFRA3;KIF5B;LAMA5;LAMC2;NFIB;PLXNB1;PLXNB3;ENAH;RELN;SEMA3G;PTCH1;RAC1;RAC2;RPL24;CXCL12;NIBAN2;BMPR1B;SLIT3;BSG;VASP;VEGFA;SEMA3B;NRP1;SEMA5A;RPS6KA5;NRXN3;MYOT	2.90786	1.47e-08
GOBP_ORGANIC_ACID_TRANSMEMBRANE_TRANSPORT	ARL6IP5;SLC16A10;SLC15A4;SLC25A29;SLC43A2;EMB;ACSL1;ARL6IP1;FOLR1;MPC2;ITGB1;LRP2;ACSL5;SLC38A2;SLC47A1;RGS2;RGS4;SLC1A1;SLC1A7;SLC2A1;SLC3A1;SLC3A2;SLC6A6;SLC7A2;SLC11A1;SLC16A1;THBS1;TNF;SLC7A5;IRS2;SLC7A7;CD36;SLC23A1	3.51445	1.49e-08
GOBP_NEGATIVE_REGULATION_OF_VIRAL_PROCESS	TNIP1;IFITM3;IFITM2;HEXIM1;FCN1;GSN;IFI16;ISG20;LTF;LY6E;PLSCR1;PPIA;RESF1;ZC3HAV1;PTX3;CCL5;SLPI;BST2;TNF;ZFP36;IFITM1;SNX3;BANF1;CH25H	4.68503	1.55e-08
GOBP_ROOF_OF_MOUTH_DEVELOPMENT	OSR2;OSR1;DLX5;TIPARP;IFT172;INTU;INSIG1;IRF6;ITGB8;MSX1;PDGFRA;PRRX1;BNC2;PLEKHA1;CSRNP1;SNAI2;TBX3;TWIST1;SUMO1;ARID5B;TMEM107;PKDCC;DHRS3;HAND2	4.68503	1.55e-08
GOBP_REGULATION_OF_LIPASE_ACTIVITY	PHB2;ADCYAP1R1;EDNRA;ESR1;ABL2;GNA15;ANG;ANXA1;APOC1;CCN1;ARF4;RHOA;RHOC;ARL1;LRP1;PDGFRA;PLA2G5;POR;PPT1;RGS2;CCL5;BICD1;ANXA8;C5AR1	4.68503	1.55e-08
GOBP_NEGATIVE_REGULATION_OF_CYTOSKELETON_ORGANIZATION	WASF2;CIB1;TRIOBP;CORO1A;ADD3;PLEKHH2;MTPN;EPS8;SPEF1;GSN;STMN1;TACSTD2;MAP1B;MET;NPM1;F11R;SHANK1;LIMA1;PFN1;PFN2;PIK3R1;TWF1;SPTBN1;SPTBN2;TJP1;TMSB4X;WAS;CAPZA2;RHPN2;TMEM67;MYADM;TMSB10;ARHGEF2;GMFG	3.42651	1.55e-08
GOBP_BODY_MORPHOGENESIS	COL1A1;DLX5;DKK1;TIPARP;GPC3;ANKRD11;IHH;MMP2;MSX1;PDGFRA;PLEKHA1;RRAS;CSRNP1;FUZ;CRISPLD1;CRISPLD2;ARID5B	7.16223	1.56e-08
GOBP_GRANULOCYTE_ACTIVATION	FCER1G;GRN;ANXA1;ANXA3;CXCL8;IL18;ITGAM;ITGB2;PLA2G2A;KMT2E;CCL3;CCL5;SPI1;STXBP2;TNF;TYROBP;VAMP8	7.16223	1.56e-08
GOBP_REGULATION_OF_NEURON_DIFFERENTIATION	ADRA2C;DPYSL2;JAG1;EDNRB;EIF4E;DKK1;FOXO3;GATA2;LSM1;HES1;ID2;ID4;ITGB1;RHOA;MAP1B;ZFHX3;NBL1;PBX1;PCP4;RELN;B2M;BCL2;ROCK1;CXCL12;SFRP1;SFRP2;SOX9;TCF4;ZEB1;TCF12;TP73;YWHAH;IRX3;CALR;SOCS2;SPAG9;ARHGEF2;NREP	3.1529	1.58e-08
GOBP_REGULATION_OF_CARDIAC_MUSCLE_CONTRACTION	AKAP9;CHGA;CLIC2;CCN2;DSG2;DSP;GATA4;GJA5;RANGRF;HSP90AA1;JUP;ATP1B1;ATP2A2;PDE4B;PKP2;RGS2;SRI;STC1;SUMO1;CALM1;CALM2;CAV1	5.13606	1.6e-08
GOBP_GLUCOSE_METABOLIC_PROCESS	TSTD1;FAM3C;SORBS1;OMA1;ENO1;FABP5;FOXO1;GAPDH;SERP1;GPD1;PGP;APOD;IGF1;IGFBP3;IGFBP4;INSR;LEP;LEPR;MDH2;MST1;ATF3;NNMT;PDK4;PFKL;PGK1;PKM;PMAIP1;SELENOS;SDHAF3;PPP4R3B;RANBP2;SORD;TFF3;TNF;TPI1;IRS2;MIDN	3.21175	1.6e-08
GOBP_CELLULAR_BIOGENIC_AMINE_METABOLIC_PROCESS	PARK7;COMT;MTPN;EDNRA;ALDH2;PNKD;AMD1;GCH1;HNMT;IDO1;ITGAM;ITGB2;MAOA;NNMT;NR4A2;OAZ1;AZIN1;VPS35;SAT1;SLC1A1;SRM;TRH;KMO;KYNU;HAND2	4.47997	1.63e-08
GOBP_SPERM_AXONEME_ASSEMBLY	CFAP206;CFAP65;CFAP157;CFAP47;MNS1;CFAP44;UBE2B;SPAG16;CFAP69;SPEF2;CFAP43;TPGS1;SPAG6	11.3087	1.66e-08
GOBP_T_CELL_MIGRATION	CXCL13;CORO1A;GPR183;ECM1;AIF1;ABL2;PYCARD;ICAM1;APOD;RHOA;CD99;MSN;F11R;SELENOK;CCL2;CCL3;CCL5;CCL20;CCL21;CXCL12;MYO1G	5.38266	1.75e-08
GOBP_GLIAL_CELL_ACTIVATION	CTSC;CLU;AIF1;GRN;IFNGR1;IL1B;ITGAM;ITGB2;JUN;LDLR;LRP1;PTPRC;CCL3;TLR2;TNF;C5AR1;TYROBP;SPHK1	6.53161	1.78e-08
GOBP_LUNG_EPITHELIUM_DEVELOPMENT	KLF2;AGR2;CTNNB1;FGF7;FOXJ1;SPDEF;GATA6;RBPJ;NFIB;ERRFI1;MAP2K1;MAP2K2;SOX9;TP73;WNT2;CDC42	7.73787	1.82e-08
GOBP_RESPONSE_TO_PURINE_CONTAINING_COMPOUND	AKAP9;COL1A1;CYP1B1;AHR;PTK2B;FOS;FOSB;GATA6;GPD1;RAPGEF1;APEX1;HSPA5;IGFBP5;IL1B;AQP9;AREG;KCNE1;NT5E;PER1;PLAT;PTGS2;RAP1A;RAP1B;RPLP0;SOD1;ZFP36L1;STC1;BSG;THBD;HSP90B1;EZR	3.65707	1.85e-08
GOBP_RESPONSE_TO_CADMIUM_ION	CYBB;DAXX;FOS;GCLC;JUN;MT1E;MT1F;MT1G;MT1H;MT1M;MT1X;MT2A;SOD1;SOD2;SORD;SUMO1;SLC30A1;CAT;AKR1C3	6.05582	1.87e-08
GOBP_POSITIVE_REGULATION_OF_PROTEIN_POLYMERIZATION	ARPC2;AKAP9;CDC42EP3;CTTN;PTK2B;GRB2;PYCARD;HCK;HSPA1A;HSPA1B;HSP90AA1;RHOA;ARL2;MAP1B;MET;TPPP3;PFN1;PFN2;SLAIN2;RAC1;RPS3;CCL21;VASP;PDE4DIP	4.61603	1.95e-08
GOBP_LAMELLIPODIUM_ORGANIZATION	ARPC5;ACTR2;ARPC2;WASF2;PDPN;EPHA2;CTTN;SPATA13;SPEF1;HSP90AA1;ITGB1;ABLIM1;ENPP2;PIK3R1;PLXNB3;CCDC88A;BRK1;TWF1;RAC1;RAC2;VCL;WAS;CD44;CDC42	4.61603	1.95e-08
GOBP_NEURAL_PRECURSOR_CELL_PROLIFERATION	CDH2;SPINT2;CTNNA1;CTNNB1;ARX;EMX2;FOXO1;FOXO3;PLXNB2;GATA2;GNAI2;GNG5;HIF1A;ID2;ID4;ILK;ITGB1;RHOA;LRP2;MDK;NAP1L1;PCM1;PTN;SOX10;SPINT1;VEGFA;WNT2;BTG2;AKNA;TMEM14B;NUMB;ARHGEF2	3.55164	1.98e-08
GOBP_REGULATION_OF_DNA_DAMAGE_RESPONSE_SIGNAL_TRANSDUCTION_BY_P53_CLASS_MEDIATOR	DDX5;HIC1;MDM2;MIF;MSX1;NPM1;PMAIP1;RPL26;SNAI2;SOX4;TWIST1;PTTG1IP;EEF1E1;CD44;CD74	8.51417	1.98e-08
GOBP_REGULATION_OF_ORGANELLE_ASSEMBLY	PDCD6IP;SDCCAG8;C9orf72;PPP1R35;MAPK15;SYNE2;NUPR1;INTU;CHMP2A;CHMP4A;GSN;HCK;HNRNPU;HSPA1A;HSPA1B;RHOA;LCP1;MAP4;MSN;NPM1;SH3GLB1;ZMYND10;DCDC2;CHMP5;DYNC2LI1;STX18;MNS1;CCDC88A;CHMP1B;ODF2L;RP1;SDC4;SDCBP;KIF9;TNF;VDAC3;EZR;EVI5;FUZ;IFT88;CCP110;SEPTIN7	2.91479	2.02e-08
GOBP_ODONTOGENESIS	ADAMTS5;OSR2;COL1A1;COL1A2;OSR1;ADM;APCDD1;CTNNA1;CTNNB1;EDN1;GATA6;ANKRD11;ID3;AQP3;RHOA;LAMA5;LAMB1;MSX1;MSX2;SERPINE1;PAM;PDGFRA;ASPN;HTRA1;PERP;BSG;TWIST1;WLS;SLC7A5;HAND2	3.74056	2.03e-08
GOBP_NEGATIVE_REGULATION_OF_LYMPHOCYTE_ACTIVATION	LILRB2;GPNMB;CEBPB;FGL2;FGR;FOXJ1;ANXA1;HLA-DRB1;HMGB1;ID2;IHH;IL10;IDO1;IRF1;ARG2;LGALS3;MDK;MNDA;PAWR;PRKAR1A;AXL;PELI1;SDC4;SAMSN1;VSIR;SFRP1;PRDX2;TNFAIP3;TYROBP;LAPTM5;LST1;RASSF5;DLG5;CD74	3.37443	2.13e-08
GOBP_NEGATIVE_REGULATION_OF_IMMUNE_RESPONSE	FGL2;IRAK3;COL3A1;CD55;AHR;A2M;FGR;FOXJ1;SAMHD1;GPR17;GRN;ANXA1;HCK;HLA-A;HLA-B;HLA-DRB1;HLA-E;IFI16;IL7R;IL10;ARG2;LGALS3;ARRB2;CD46;SERPINB9;PARP14;SELENOS;PSMA1;PTPRC;RPS19;SAMSN1;SPI1;SERPING1;TNFAIP3;C4BPA;BANF1;CD59	3.16961	2.14e-08
GOBP_MAMMARY_GLAND_ALVEOLUS_DEVELOPMENT	PHB2;ESR1;HIF1A;ID2;AR;AREG;PRLR;CCND1;VEGFA;DDR1;SOCS2	15.9393	2.23e-08
GOBP_NECROTIC_CELL_DEATH	PPIF;TMEM123;NUPR1;SLC25A4;BIRC3;MAP3K5;ASAH1;MT-CO2;NDUFC2;NINJ1;DDR2;PELI1;SLC6A6;TSPO;TNF;ATG9A;ALKBH7;YBX3;CAV1;CFLAR;ARHGEF2	5.27837	2.3e-08
GOBP_CELL_CELL_ADHESION_VIA_PLASMA_MEMBRANE_ADHESION_MOLECULES	CDH2;CDH11;MPZL2;JAML;EMB;CLDN4;CLDN3;CLDN7;IGSF11;CXADR;DSC3;DSG2;ALCAM;FAT2;CDHR3;PALLD;PLXNB2;CADM1;CLDN15;PCDH17;CRB2;ICAM1;IL1RN;IL10;ITGA5;ITGAM;ITGB1;ITGB2;CDHR4;MBP;PCDH7;PLXNB3;FXYD5;PTPRF;PTPRS;NECTIN2;CLSTN2;BSG;VCAM1;SPARCL1;CD164;CLDN10;CLDN1;IGFN1;MYADM;KLF4;MYOT;CDH1	2.66986	2.32e-08
GOBP_NEGATIVE_REGULATION_OF_NERVOUS_SYSTEM_DEVELOPMENT	SEMA6B;SEMA3C;CTNNA1;CTNNB1;DKK1;TMEM98;HES1;ID1;ID4;IFRD1;IL1B;LDLR;MBP;PCM1;B2M;SEMA3G;RTN4;PTN;PTPRS;SORL1;SOX10;SPP1;DYNLT1;TSPO;THY1;TLR2;TNF;YWHAH;SEMA3B;NRP1;SEMA5A;CDH1	3.52171	2.34e-08
GOBP_POSITIVE_REGULATION_OF_TRANSMEMBRANE_RECEPTOR_PROTEIN_SERINE_THREONINE_KINASE_SIGNALING_PATHWAY	CDKN1C;CITED2;GIPC1;LRG1;CSNK2B;DAB2;ENG;SULF1;GATA4;GATA6;GPC3;CRB2;HES1;HSP90AB1;CCN1;RBPJ;ILK;MSX1;MSX2;C20orf27;SDCBP;TGFB1;TGFB1I1;LEFTY2;THBS1;FBXL15;GDF15;ZEB2	3.93991	2.34e-08
GOBP_MACROAUTOPHAGY	PHB2;GABARAP;GABARAPL2;SPATA33;CTSD;DCN;C9orf72;ERN1;GABARAPL1;ATP6V1C2;GAPDH;HSPB8;NUPR1;CHMP2A;CHMP4A;SLC25A4;SLC25A5;HIF1A;MAP1LC3C;ATP2A2;SH3GLB1;ATP6V1D;UFC1;CHMP5;ATP6V1A;ATP6V1B2;ATP6V0C;ATP6V0B;RETREG1;TOMM7;VPS13C;ARL8B;VPS35;WDR45B;CHMP1B;RHEB;SCOC;BNIP3L;VDAC1;ATG9A;CALM1;IFT88;MAP1LC3B;VMP1;EMC6;MAP1LC3A;VAMP8;SQSTM1;ATP6V0E1;ATP6V0D1;BAG3;ATP6V1G1	2.54834	2.39e-08
GOBP_REGULATION_OF_PROTEIN_DEPHOSPHORYLATION	LILRB2;CSNK2B;RCAN1;AGTR2;FKBP1A;PPP1R15A;GNAI2;PPP1R42;HSP90AB1;LGALS3;PPIA;PPP1R7;PPP2R5A;PTPRC;ROCK1;TGFB1;TNF;HSP90B1;YWHAE;CALM1;CALM2;PPP1R15B;PPP1R16A;LRRC46	4.54904	2.45e-08
GOBP_REGULATION_OF_PHOSPHOLIPASE_ACTIVITY	PHB2;ADCYAP1R1;EDNRA;ESR1;ABL2;GNA15;ANG;ANXA1;CCN1;ARF4;ARL1;LRP1;PDGFRA;PLA2G5;PPT1;RGS2;CCL5;BICD1;ANXA8;C5AR1	5.56088	2.47e-08
GOBP_NEGATIVE_REGULATION_OF_OXIDATIVE_STRESS_INDUCED_CELL_DEATH	RACK1;PARK7;NCOA7;CTNNB1;GATA4;HIF1A;HSPB1;IL10;MET;NFE2L2;DDR2;PPIA;OXR1;SOD2;TXN;NR4A3;NME5;PAGE4	6.35493	2.47e-08
GOBP_ANION_TRANSMEMBRANE_TRANSPORT	ARL6IP5;CLIC1;CLIC2;SLC15A4;SLC25A29;SLC43A2;EMB;CLDN4;SLC26A2;ARL6IP1;FOLR1;GABRP;MPC2;CLIC4;GJA1;SLC25A4;SLC25A5;SLC25A6;ITGB1;LRP2;SLC25A3;FXYD1;FXYD3;SLC38A2;SLC47A1;RGS2;RGS4;SLC39A8;SLC1A1;SLC1A7;SLC3A1;SLC3A2;SLC6A8;SLC7A2;SLC11A1;SLC16A1;TNF;VDAC1;VDAC2;VDAC3;SLC44A4;SLC7A5;SLC12A8;CLIC3;XPR1;SLC23A1	2.73145	2.47e-08
GOBP_DIVALENT_INORGANIC_CATION_HOMEOSTASIS	CORO1A;CLIC2;ADM;CYBA;EDN1;EDNRA;PTK2B;FKBP1A;FLNA;ANK3;APOE;MT1E;MT1F;MT1G;MT1H;MT1M;MT1X;MT2A;ATP1B1;ATP2A2;ATP2B1;NT5E;FIS1;TMEM165;S100A14;PTPRC;SELENOK;BCL2;S100A8;S100A9;CCL3;CCL5;CCL21;CXCL12;SLC39A8;SLC1A1;SLC11A1;SRI;STC1;TMBIM6;TGM2;THY1;TPT1;HSP90B1;YWHAE;SLC30A1;SLC30A2;CALB2;ATP13A3;CALM1;CALM2;CALR;CAV1;SMDT1;HERPUD1;ATP2C2	2.44485	2.51e-08
GOBP_NEGATIVE_REGULATION_OF_SECRETION	ERP29;CHGA;ADRA2A;ADRA2C;EDN1;ERBB3;FOXO1;PNKD;GJA1;GNAI2;ANXA1;HMGCR;APOE;IL1B;LEP;LIF;PIM3;OSM;PFKL;PTGER3;RAP1A;RAP1B;SFRP1;SPI1;TSPO;TNF;TNFRSF1A;TNFRSF1B;TRH;UCP2;SLC30A1;RAB11FIP1;VAMP8;MIDN;CD74	3.2756	2.52e-08
GOBP_CORTICAL_CYTOSKELETON_ORGANIZATION	PDCD6IP;CAVIN3;EPB41L2;EPB41L3;RHOA;RHOB;RHOC;RND3;LCP1;LLGL2;PLEK;RAB13;RAC1;RAC2;ROCK1;TLN1;TNF;EZR;CALR	5.90986	2.54e-08
GOBP_NEPHRON_MORPHOGENESIS	OSR1;CTNNB1;AGTR2;GPC3;HOXB7;HES1;ILK;LAMA5;LIF;TACSTD2;MYC;PBX1;WNT4;AHI1;LGR4;PTCH1;BCL2;SOX9;HNF1B;VEGFA;PAX8;IRX3	4.95885	2.66e-08
GOBP_POSITIVE_REGULATION_OF_VASCULAR_ENDOTHELIAL_GROWTH_FACTOR_PRODUCTION	CYP1B1;SULF1;GATA4;HIF1A;IL1A;IL1B;IL6ST;PTGS2;TGFB1;C3;C3AR1;C5AR1;EIF2AK3	10.6018	2.81e-08
GOBP_MUSCLE_ADAPTATION	FBXO32;MTPN;CYBA;EDN1;AIF1;PI16;FOXO1;FOXO3;GATA6;GSN;LMCD1;IGF1;IGFBP5;IL1B;IL6ST;JARID2;LMNA;ATP2A2;ERRFI1;TWF1;RGS2;RGS4;ROCK1;TNFRSF1A;TNFRSF1B;NR4A3;CFLAR;HAND2	3.89797	2.83e-08
GOBP_POSITIVE_REGULATION_OF_PROTEIN_LOCALIZATION_TO_NUCLEUS	LAMTOR5;FERMT2;PARK7;FLNA;CD2AP;HCLS1;HSP90AA1;HSP90AB1;JUP;LEP;LIF;NPM1;PIK3R1;PTGS2;RAN;TCP1;TFRC;TGFB1;CCT3;CCT6A;EIF2AK3;BAG3;CDH1	4.69909	2.92e-08
GOBP_NEGATIVE_REGULATION_OF_DEVELOPMENTAL_GROWTH	CDKN1A;CITED2;SEMA6B;SEMA3C;CXADR;ADRB3;PI16;WWC1;IFRD1;JARID2;LGMN;SEMA3G;RTN4;PTCH1;PTPRS;RGS2;RGS4;SPP1;STK4;TP73;SEMA3B;NRP1;SOCS2;SEMA5A;SPAG9;GDF15;CDH1	4.01513	2.99e-08
GOBP_DNA_DAMAGE_RESPONSE_SIGNAL_TRANSDUCTION_BY_P53_CLASS_MEDIATOR	CDKN1A;PLK3;DDX5;FOXO3;HIC1;MDM2;MIF;MSX1;MUC1;MYO6;NPM1;RPS27L;PMAIP1;RPL26;SNAI2;SOX4;TWIST1;PTTG1IP;EEF1E1;CD44;CD74	5.17894	2.99e-08
GOBP_REGULATION_OF_ATP_DEPENDENT_ACTIVITY	MRLN;PPIF;AHSA1;GABARAPL2;HNRNPU;DNAJB1;C4orf3;LTF;ATP1B1;ATP1B3;FXYD2;PFN1;PFN2;PLSCR1;DNAJC10;SSBP1;TPM1;TPM2;SUMO1;VMP1;ATP5IF1	5.17894	2.99e-08
GOBP_POSITIVE_REGULATION_OF_OSTEOBLAST_DIFFERENTIATION	CEBPB;CEBPD;FERMT2;CTHRC1;CLIC1;CTNNB1;JAG1;IGF1;CCN1;IL6ST;ILK;JUND;LTF;SMAD5;MSX2;DDR2;WNT4;TENT5A;SFRP2;BMPR1B;IFITM1	5.17894	2.99e-08
GOBP_EPIBOLY	PDPN;FERMT2;LRG1;COL5A1;FLNA;CCN1;ITGA5;ITGB1;RHOA;RHOC;LCP1;MSX2;DDR1;CD44;CD151	8.15907	3.01e-08
GOBP_MUSCLE_CELL_APOPTOTIC_PROCESS	EDN1;ENG;PTK2B;ALOX12;GATA4;GATA6;NUPR1;PDCD4;HSP90AA1;IGF1;ARRB2;MDK;MAP3K5;NFE2L2;ATP2A2;PPP1R10;SFRP2;SOD2;PAX8;SLC7A5;CAPN2;CFLAR;HAND2;BAG3	4.48397	3.07e-08
GOBP_POSITIVE_REGULATION_OF_PROTEASOMAL_UBIQUITIN_DEPENDENT_PROTEIN_CATABOLIC_PROCESS	TRIB1;STUB1;RACK1;GABARAP;CLU;PLK3;DAB2;HSPBP1;RNF144B;ARIH1;RNF19A;GCLC;NOP53;HSPA1A;HSPA1B;MDM2;NFE2L2;SUMO2;ELOB;SUMO1;CAV1;ZFAND2A;HERPUD1;RBX1	4.48397	3.07e-08
GOBP_REGULATION_OF_PATTERN_RECOGNITION_RECEPTOR_SIGNALING_PATHWAY	IRAK3;SLC15A4;CYBA;DDX3X;ESR1;GPS2;NOP53;HMGB1;BIRC3;HSPA1A;HSPA1B;IRF1;LTF;ARRB2;NINJ1;LGR4;RTN4;PELI1;PTPRS;SEC14L1;TLR2;TSPAN6;TNFAIP3;CAV1;CD14;CD36	4.14844	3.09e-08
GOBP_REGULATION_OF_SUPEROXIDE_METABOLIC_PROCESS	FBLN5;CYBA;GCH1;GNAI2;H19;GSTP1;ITGAM;ITGB2;NFE2L2;CLEC7A;SOD1;TGFB1;TYROBP;CD36	9.1365	3.1e-08
GOBP_FATTY_ACID_TRANSPORT	RBP7;PLIN2;CRABP2;EDN1;FABP5;FABP6;ACSL1;ACSL3;ANXA1;APOE;IL1A;IL1B;MIF;FIS1;ACSL5;PLA2G2A;PLA2G5;PMP2;MAP2K6;RBP1;SLC2A1;THBS1;MFSD2A;IRS2;CD36	4.30291	3.12e-08
GOBP_INTERLEUKIN_1_PRODUCTION	NLRP3;CARD16;EGR1;SERPINB1;GAS6;PYCARD;GSTP1;ANXA1;HMGB1;HSPB1;IFI16;IGF1;IL10;ARG2;LPL;ARRB2;MNDA;ERRFI1;S100A13;SAA1;CCL3;CLEC7A;STAT3;TNF;TNFAIP3;TYROBP;IL1R2;SPHK1;CD36	3.75819	3.17e-08
GOBP_CELLULAR_RESPONSE_TO_CARBOHYDRATE_STIMULUS	RACK1;ADRA2A;CYBA;ENDOG;ERN1;FOXO3;PLCB1;MPC2;ZBTB20;GAS6;GATA4;GCLC;GCLM;HIF1A;HLA-DRB1;ICAM1;LEP;PIM3;SERPINF1;CCDC186;MAP2K3;MAP2K6;RBM4;TRA2B;CLEC7A;SOX4;SRI;ZFP36L1;UCP2;XBP1;IRS2;HMGN3	3.46333	3.25e-08
GOBP_GLYCOPROTEIN_METABOLIC_PROCESS	OST4;RAMP1;TNIP1;ST3GAL6;OGA;PARK7;SLC51B;COL11A1;CST3;CTNNB1;CTSL;DAD1;DCN;KRTCAP2;PHLDA1;SULF1;PLCB1;NUDT14;BACE2;GALNT3;GCNT1;B4GALT1;SERP1;DSE;HIF1A;IGF1;IHH;LEP;MANBA;MGAT1;MGAT2;PAWR;GALNT7;PLOD2;DPM3;TET2;CSGALNACT2;ST6GALNAC1;TMEM165;PTX3;OSTC;BCL2;RPN1;BGN;CCL21;SLC39A8;BMPR1B;UGDH;TMEM258;SRD5A3;TUSC3;GALNT4;DERL3;GCNT3;TM9SF2;ITM2B;ITM2A;TMEM59;SPOCK2;HS3ST2	2.34049	3.25e-08
GOBP_COGNITION	ACTR2;LILRB2;CEBPB;ARL6IP5;C12orf57;METTL23;DNAAF4;RCAN1;DKK1;PLCB1;ARC;FOS;ADGRF1;HIF1A;HLA-DRA;HMGCR;APOE;INSR;ITGA3;ITGA5;ITGB1;ARF4;LDLR;MDK;MEIS2;MME;NEDD9;SHANK1;PAIP2;SERPINF1;PPT1;LGMN;RELN;B2M;PTGS2;PTN;BCHE;ATXN1;SGK1;SLC1A1;TLR2;TNF;C5AR1;VDAC1;BTG2;TUSC3;MFSD2A;DNAH11;CCND2;NRXN3;EIF4A3	2.54633	3.3e-08
GOBP_RELEASE_OF_CYTOCHROME_C_FROM_MITOCHONDRIA	PPIF;CLU;FAM162A;PRELID1;SFN;PYCARD;IGF1;LMNA;ARRB2;FIS1;PLAUR;PMAIP1;BCL2;BID;SOD2;GGCT;TNFSF10;PDCD5	6.18779	3.4e-08
GOBP_ACTIVATION_OF_CYSTEINE_TYPE_ENDOPEPTIDASE_ACTIVITY_INVOLVED_IN_APOPTOTIC_PROCESS	PDCD6;RACK1;CTSH;F3;MTCH1;FAM162A;BEX3;PYCARD;HSPD1;HSPE1;RPS27L;PMAIP1;CYCS;IFT57;S100A8;S100A9;BID;SLC1A1;TNF;LAPTM5;CFLAR;EIF2AK3	4.87469	3.4e-08
GOBP_PROTEIN_DEPHOSPHORYLATION	LILRB2;PTPMT1;CSNK2B;DUSP18;RCAN1;DUSP1;DUSP2;DUSP6;AGTR2;EYA2;FKBP1A;PPP1R15A;DAPP1;GNAI2;PGP;PPP1R42;PHPT1;HSP90AB1;LGALS3;ACP1;PPIA;DUSP23;PPP1CA;PPP1CB;PPP1R7;PPP2R5A;PPP4R3A;PPP4R3B;PTPN1;PTPRC;PTPRE;PTPRF;PTPRS;BCL2;ROCK1;TGFB1;TNF;HSP90B1;YWHAE;PTP4A1;CALM1;CALM2;PPP1R15B;PPP1R16A;LRRC46	2.73337	3.41e-08
GOBP_ORGANIC_HYDROXY_COMPOUND_BIOSYNTHETIC_PROCESS	GIPC1;PARK7;ADCYAP1R1;DAB2;DDT;SPTSSA;ALDH2;PTK2B;FDFT1;FDPS;ALOX12;GCH1;PGP;HMGCR;HMGCS1;APOE;IMPA2;INSIG1;LEP;ASAH1;ASIP;NFKB1;NR4A2;PCBD1;CYB5R1;PLEK;PLTP;WNT4;POR;VPS35;SCP2;SNAI2;SOD1;SQLE;STAR;TNF;SRD5A3;AKR1C3;MBTPS1;SPHK1;CH25H;HAND2;ZEB2	2.80589	3.55e-08
GOBP_NEGATIVE_REGULATION_OF_RESPONSE_TO_BIOTIC_STIMULUS	TRIB1;FGL2;IRAK3;CARD16;AHR;A2M;SAMHD1;TRAF3IP1;GRN;HLA-A;HLA-B;HLA-E;IFI16;ARG2;LTF;ARRB2;PCBP2;SERPINB9;PARP14;HTRA1;RPS19;SEC14L1;PRDX2;SERPING1;TSPAN6;TNFAIP3;BANF1	3.96997	3.63e-08
GOBP_REGULATION_OF_RECEPTOR_MEDIATED_ENDOCYTOSIS	AP2M1;CLU;DAB2;DKK1;ARC;CD2AP;ANXA2;HNRNPK;APOC1;INSR;ARF1;LRPAP1;ARRB2;SERPINE1;AHI1;PPT1;B2M;RAC1;BICD1;CCL21;SDCBP;SFRP4;C3;VEGFA;WDR54;NUMB;CD63	3.96997	3.63e-08
GOBP_IRON_ION_HOMEOSTASIS	CP;CYB561;ALAS2;FTH1;FTL;SLC40A1;HIF1A;LCN2;LTF;MYC;SLC25A37;ATP6V1A;B2M;SLC39A8;SLC11A1;SOD1;SOD2;SRI;TFRC;CYBRD1;NCOA4;ATP6V0D1;ATP6V1G1	4.6267	3.68e-08
GOBP_DECIDUALIZATION	CITED2;CTSB;TCF23;GJB2;JUNB;LIF;TPPP3;PTGS2;PTN;SPP1;STC1;BSG	12.0413	3.73e-08
GOBP_TUMOR_NECROSIS_FACTOR_MEDIATED_SIGNALING_PATHWAY	CARD16;EIF5A;HIPK1;PTK2B;FOXO3;GAS6;GPS2;PYCARD;GSTP1;BIRC3;HSPA1A;HSPA1B;ILK;KRT18;LIMS1;NFKBIA;TMSB4X;TNF;TNFAIP3;TNFRSF1A;TNFRSF1B;LAPTM5;ACTN4;TXNDC17;SPPL2A;SPHK1	4.09841	3.79e-08
GOBP_NUCLEOTIDE_PHOSPHORYLATION	SLC2A6;AK7;ENO1;AK9;GAPDH;ZBTB20;NUPR1;GPD1;NME7;HIF1A;IGF1;INSR;LDHA;ARL2;NME1;NME2;NME3;CMPK1;PFKL;PGK1;PKM;DDIT4;STAT3;TPI1;NME5	4.24696	3.86e-08
GOBP_REGULATION_OF_DNA_TEMPLATED_TRANSCRIPTION_IN_RESPONSE_TO_STRESS	KLF2;CITED2;CEBPB;EGR1;STOX1;HIF1A;HSPA5;RBPJ;JUN;MUC1;ATF3;NFE2L2;TCIM;TMBIM6;VEGFA;BAG3	7.20383	3.87e-08
GOBP_REGULATION_OF_MIRNA_METABOLIC_PROCESS	KCNQ1OT1;DDX5;EGR1;FOXO3;FOS;GATA2;GATA6;HIF1A;IL10;JUN;MYC;NFIB;NFKB1;GAS5;SOX9;SPI1;STAT3;KLF5;TGFB1;TNF;KLF4	5.08237	3.87e-08
GOBP_REGULATION_OF_CARBOHYDRATE_METABOLIC_PROCESS	FAM3C;SORBS1;SLC2A6;ADCYAP1R1;PTK2B;FOXO1;ZBTB20;NUPR1;GPD1;PGP;HIF1A;IGF1;IGFBP3;IGFBP4;INSR;LEP;LEPR;ARL2;MST1;NFKB1;NNMT;PDK4;PLEK;PMAIP1;DDIT4;PPP1CA;SELENOS;SDHAF3;PPP4R3B;RANBP2;STAT3;TFF3;TGFB1;PHLDA2;IRS2;MIDN	3.14483	3.89e-08
GOBP_PEPTIDE_TRANSPORT	CHGA;PARK7;SLC16A10;SLC15A4;CPE;ADRA2A;EDN1;ACSL4;FOXO1;MPC2;GJA1;SERP1;GLUL;ANXA1;HIF1A;HLA-DRB1;ICA1;IL1B;IL1RN;LEP;PIM3;MGST1;PFKL;CCDC186;RBM4;RFX3;S100A8;CCL5;SFRP1;SLC15A1;SLC16A1;SOX4;SRI;HNF1B;TNF;TRH;UCP2;PAX8;IRS2;MIDN;AIMP1;HMGN3;SLC9A3R1;CD74	2.74848	4.17e-08
GOBP_POSITIVE_REGULATION_OF_CELL_MORPHOGENESIS_INVOLVED_IN_DIFFERENTIATION	ACTR2;ARPC2;CIB1;FERMT2;TRIOBP;CUX1;DAB2;FLNA;ILK;LIMS1;CAPRIN1;MDK;NEDD9;P4HB;RELN;RAC1;S100A10;DOCK5;CALR;NRP1;MYADM;CDC42	4.79334	4.34e-08
GOBP_PANCREAS_DEVELOPMENT	CDH2;MSLN;DNAAF1;CTNNB1;GATA6;ANXA1;HES1;CCDC39;IHH;INSR;MEIS2;MET;CCDC40;RBM4;RFX3;RHEB;SOX4;SOX9;HNF1B;WLS;ALDH1A2;EIF2AK3	4.79334	4.34e-08
GOBP_APOPTOTIC_CELL_CLEARANCE	FCN1;GAS6;ANXA1;HMGB1;LRP1;MFGE8;AXL;RAC1;RAC2;CCL2;TGM2;THBS1;C3;C4A;C4B;TYROBP;CD36	6.52981	4.42e-08
GOBP_POSITIVE_REGULATION_OF_RNA_SPLICING	CIRBP;CLNS1A;ERN1;RBMX;TRA2A;HSPA1A;HSPA8;NCL;PIK3R1;SLC38A2;RBM3;SRSF5;TRA2B;WDR77;PRDX6	7.83245	4.49e-08
GOBP_INTEGRATED_STRESS_RESPONSE_SIGNALING	CEBPB;CEBPD;AGR2;TMED2;OMA1;FOS;PPP1R15A;HSPA5;JUN;JUNB;MAF;NFE2L2;PTPN1;PPP1R15B;EIF2AK3	7.83245	4.49e-08
GOBP_NUCLEOSIDE_DIPHOSPHATE_METABOLIC_PROCESS	SLC2A6;AK7;ENO1;AK9;GAPDH;ZBTB20;NUPR1;GPD1;GUK1;NME7;HIF1A;IGF1;INSR;LDHA;ARL2;NME1;NME2;NME3;NT5E;RRM2B;CMPK1;PFKL;PGK1;PKM;DDIT4;STAT3;TPI1;NME5;TJP2	3.68517	4.53e-08
GOBP_INTERLEUKIN_12_PRODUCTION	IRAK3;PLCB1;HLA-B;HMGB1;HSPD1;IRF8;IL10;IDO1;IRF1;LEP;ARRB2;MDK;NFKB1;CLEC7A;THBS1;TLR2;LAPTM5;CD36;CD47	5.64153	4.56e-08
GOBP_RENAL_ABSORPTION	MAGED2;CLDN4;EDN1;EDNRA;EDNRB;FOLR1;GAS6;GSN;HBB;AQP3;SGK1;AKR1C3;SLC9A3R1	9.97818	4.63e-08
GOBP_REGULATION_OF_MONOOXYGENASE_ACTIVITY	PARK7;AGTR2;PTK2B;DDAH2;DDAH1;GCH1;GLA;HIF1A;APOE;IL1A;IL1B;LEP;NFKB1;POR;S100A1;TNF;HM13;CAV1	6.02975	4.63e-08
GOBP_REGULATION_OF_EXTRACELLULAR_MATRIX_ORGANIZATION	PDPN;CST3;AEBP1;DPP4;RGCC;EFEMP2;LAMB1;LRP1;NID1;DDR2;SOX9;TGFB1;TNFRSF1A;TNFRSF1B;TNXB;DDR1;ANTXR1;CFLAR	6.02975	4.63e-08
GOBP_REGULATION_OF_MITOTIC_CELL_CYCLE_PHASE_TRANSITION	CDKN1A;CDK2AP2;GPNMB;PHB2;PLK3;DDX3X;DUSP1;AIF1;STOX1;PLCB1;CDC26;SYF2;KANK2;RGCC;GPR132;ANAPC4;NOP53;ANXA1;APEX1;ID2;IK;MDM2;MUC1;DDR2;RRM2B;PBX1;RPS27L;TAOK3;ANAPC5;ANAPC11;USP47;KMT2E;PSME1;PSME2;RBBP8;CCND1;BCL2;ACTB;RPL26;CCL2;BID;NABP1;SMARCE1;ZFP36L1;ZFP36L2;WEE1;NEK11;TMEM14B;RAB11A;CCND2;CCNG1;CCNH;KLF4;TRIP13;ADAMTS1	2.41643	4.64e-08
GOBP_SULFUR_COMPOUND_METABOLIC_PROCESS	TSTD1;AASS;AKR1A1;ST3GAL6;ARL6IP5;AHCYL1;PARK7;DCN;SLC26A2;EDNRA;AHCY;EDNRB;ACSL1;ACSL3;ACSL4;MPC2;AMD1;PHGDH;GCLC;GCLM;GPX4;GSTA3;GSTM3;GSTP1;DSE;HAGH;HMGCS1;HSPA9;GSTK1;MAT2A;CHST6;MGST2;MPST;MTHFD2L;NDUFAB1;NFE2L2;CIAO2B;PDK4;ACSL5;ADI1;PPT1;CSGALNACT2;BGN;SLC1A1;SOD1;SOD2;UGDH;PAX8;TPST1;SUCLG2;SUCLG1;PAPSS1;SPOCK2	2.45939	4.86e-08
GOBP_REGULATION_OF_STEROID_BIOSYNTHETIC_PROCESS	ADM;DAB2;EGR1;NR5A1;APOE;IGFBP7;IL1A;INSIG1;LEP;ASAH1;ATP1A1;NFKB1;WNT4;POR;SNAI2;SOD1;STAR;TSPO;TNF;AKR1C3;MBTPS1	4.99038	4.99e-08
GOBP_NEURON_PROJECTION_EXTENSION	SEMA6B;SEMA3C;CTNNB1;DPYSL2;EDN1;EDNRA;CTTN;C9orf72;ALCAM;FN1;MACF1;GOLGA4;HSP90AA1;HSP90AB1;IFRD1;APOE;ITGB1;MAP1B;SEMA3G;RTN4;SHTN1;PTPRS;CXCL12;SLIT3;VCL;VEGFA;DDR1;CXCR4;SEMA3B;NRP1;SEMA5A;SPAG9;SPAG6;CDH1	3.22724	5.35e-08
GOBP_LEUKOCYTE_MEDIATED_CYTOTOXICITY	TUBB4B;CTSC;CORO1A;CTSH;TUBB;CADM1;HLA-A;HLA-B;HLA-DRA;HLA-DRB1;HLA-E;ICAM1;IGHG1;IL7R;IL18;ITGAM;KIF5B;LEP;ARRB2;PRDX1;SERPINB9;TREM1;ARL8B;B2M;PTPRC;NECTIN2;SPI1;STXBP2;TYROBP	3.64965	5.4e-08
GOBP_NEGATIVE_REGULATION_OF_ESTABLISHMENT_OF_PROTEIN_LOCALIZATION	LYPLA1;ERP29;CHGA;PKIG;PARK7;ADRA2A;FOXO1;SVIP;HMGCR;DNAJA1;APOD;APOE;IL1B;INSIG1;KCNE1;LMAN1;PIM3;PFKL;SFRP1;TXN;SUMO1;UCP2;RAB11FIP1;SNX3;MIDN;DERL3;PKDCC;CD36;BAG3	3.64965	5.4e-08
GOBP_REGULATION_OF_STEM_CELL_DIFFERENTIATION	N4BP2L2;JAG1;GATA4;GATA6;HNRNPU;HES1;HSPA9;TACSTD2;NFE2L2;OSM;PDGFRA;OCIAD1;PTN;RBBP4;RBBP7;SOX17;SOX9;STAT3;ZFP36L2;TBX3;ZFP36;LBH	4.71465	5.5e-08
GOBP_REGULATION_OF_VIRAL_ENTRY_INTO_HOST_CELL	IFITM3;IFITM2;FCN1;GSN;HLA-DRB1;HMGB1;LGALS1;LY6E;P4HB;TMPRSS4;PTX3;NECTIN2;IFITM1;SNX3;CH25H;CD74	6.96354	5.54e-08
GOBP_POSITIVE_REGULATION_OF_PLASMA_MEMBRANE_BOUNDED_CELL_PROJECTION_ASSEMBLY	ACTR2;ARPC2;WASF2;CDC42EP3;DPYSL3;EPS8;PPP1R35;COBL;HSP90AA1;ZMYND10;PFN1;PIK3R1;FNBP1L;MNS1;CCDC88A;BRK1;RAC1;RAC2;RP1;CCL21;FUZ;IFT88;NRP1;CCP110;SEPTIN7;CDC42	4.00189	5.63e-08
GOBP_POSITIVE_REGULATION_OF_UBIQUITIN_DEPENDENT_PROTEIN_CATABOLIC_PROCESS	TRIB1;STUB1;RACK1;GABARAP;CLU;PLK3;DAB2;PTK2B;HSPBP1;RNF144B;ARIH1;RNF19A;GCLC;NOP53;HSPA1A;HSPA1B;MDM2;NFE2L2;SUMO2;ELOB;SUMO1;LAPTM5;CAV1;ZFAND2A;HERPUD1;RBX1	4.00189	5.63e-08
GOBP_MIRNA_METABOLIC_PROCESS	DDX17;KCNQ1OT1;DDX5;EGR1;FOXO3;TUT4;FOS;GATA2;GATA6;HIF1A;IL10;JUN;MYC;NFIB;NFKB1;GAS5;SOX9;SPI1;STAT3;KLF5;TGFB1;TNF;KLF4	4.48841	5.8e-08
GOBP_REGULATION_OF_NEURAL_PRECURSOR_CELL_PROLIFERATION	CDH2;SPINT2;CTNNA1;CTNNB1;FOXO1;FOXO3;GATA2;GNAI2;GNG5;HIF1A;ID2;ID4;ILK;ITGB1;RHOA;LRP2;MDK;NAP1L1;PTN;SOX10;SPINT1;VEGFA;BTG2	4.48841	5.8e-08
GOBP_TELENCEPHALON_DEVELOPMENT	CDH2;SEMA6B;TACC2;C12orf57;EFHC1;COL3A1;CSF1R;CTNNB1;ARX;DLX5;DNAH5;EMX2;ALDH1A3;PHACTR1;SYNE2;PLCB1;RPGRIP1L;SUN1;DPCD;UQCRQ;ANXA3;HIF1A;HES1;ID2;ID4;RHOA;LAMB1;MDK;NFIB;SLC38A2;RELN;RTN4;CXCL12;TRA2B;SLC2A1;SLIT3;TACC1;YWHAE;BTG2;CXCR4;TCTN1;TMEM14B;MFSD2A;NUMB	2.70961	5.94e-08
GOBP_MAINTENANCE_OF_CELL_NUMBER	CDH2;CTNNB1;JAG1;EIF4E;FOXO1;FOXO3;TUT4;GATA2;LSM1;HES1;IGF1;RBPJ;LIF;MYC;PCM1;PRRX1;PTN;SINHCAF;RBBP4;RBBP7;ACTB;SFRP1;SMARCE1;SOX4;SOX9;SPI1;STAT3;ZFP36L2;TBX3;HNF1B;KLF10;TPT1;PAX8;LBH;KLF4	3.14053	6.11e-08
GOBP_REGULATION_OF_CELL_CYCLE_PHASE_TRANSITION	CDKN1A;CDK2AP2;GPNMB;PHB2;PLK3;NEK10;DDX3X;DUSP1;AIF1;STOX1;MAPK15;PLCB1;CDC26;SYF2;KANK2;RGCC;GPR132;ANAPC4;NOP53;ANXA1;APEX1;ID2;IK;MDM2;MLF1;MN1;MUC1;NPM1;DDR2;RRM2B;PBX1;RPS27L;TAOK3;ANAPC5;ANAPC11;MAP3K20;USP47;PPP1R10;KMT2E;TCIM;PSME1;PSME2;RBBP8;CCND1;BCL2;ACTB;RPL26;CCL2;BID;NABP1;STK33;SMARCE1;ZFP36L1;ZFP36L2;WEE1;DDX39B;NEK11;TMEM14B;RAB11A;CCND2;CCNG1;CCNH;KLF4;TRIP13;ADAMTS1	2.20881	6.12e-08
GOBP_CELL_DIFFERENTIATION_INVOLVED_IN_KIDNEY_DEVELOPMENT	CD24;BASP1;OSR1;CTNNB1;JAG1;EDNRA;EDNRB;FOXJ1;HES1;LIF;PODXL;WNT4;LGR4;PRKX;PTCH1;ACTA2;PAX8;PROM1	5.87724	6.27e-08
GOBP_REGULATION_OF_GENERATION_OF_PRECURSOR_METABOLITES_AND_ENERGY	COX17;PPIF;SORBS1;SLC2A6;CAVIN3;PARK7;PHB2;COX7A2;ZBTB20;NUPR1;PRELID1;GPD1;DNAJC15;NOP53;HIF1A;IGF1;INSR;RHOA;ARL2;NDUFA4;CHCHD2;DDIT4;PPP1CA;SELENOS;CISD1;STAT3;TNF;PHLDA2;IRS2	3.61481	6.43e-08
GOBP_POSITIVE_REGULATION_OF_FOCAL_ADHESION_ASSEMBLY	FERMT2;COL16A1;LIMS1;WNT4;RAC1;ROCK1;S100A10;SDC4;SFRP1;THY1;VEGFA;NRP1	11.1811	6.47e-08
GOBP_RESPONSE_TO_TUMOR_CELL	TXNIP;DAPK1;AHR;RBMS3;HLA-A;HLA-DRB1;HMGB1;HSPD1;NECTIN2;SPI1;PRDX2;LAPTM5;TNFRSF10B;KLF4;DLEC1	7.53098	6.61e-08
GOBP_MAINTENANCE_OF_PROTEIN_LOCALIZATION_IN_ORGANELLE	KDELR1;KDELR2;PARK7;SYNE1;SUN1;ARL2BP;NR5A1;HNRNPU;HSPA5;INSIG1;CHCHD10;ARL2;SKP1;TSPO;TXN	7.53098	6.61e-08
GOBP_MITOCHONDRIAL_ELECTRON_TRANSPORT_UBIQUINOL_TO_CYTOCHROME_C	UQCR11;UQCRQ;UQCR10;MT-CYB;CYCS;UQCRB;UQCRC2;UQCRH;UQCC3	23.4605	6.89e-08
GOBP_POSITIVE_REGULATION_OF_INTRINSIC_APOPTOTIC_SIGNALING_PATHWAY_BY_P53_CLASS_MEDIATOR	EIF5A;MSX1;MYC;RPL11;RPL26;RPS7;UBB	91.1842	7.07e-08
GOBP_POSITIVE_REGULATION_OF_SMOOTH_MUSCLE_CELL_PROLIFERATION	CYBA;EDN1;AIF1;EREG;ERN1;GJA1;GNAI2;ID2;IGF1;IGFBP5;IL10;IL18;IRAK1;JUN;MAP3K5;MMP2;DDR2;PTGS2;CCL5;TGFB1;THBS1;TNF;NR4A3;ADAMTS1	4.24131	7.29e-08
GOBP_POSITIVE_REGULATION_OF_MORPHOGENESIS_OF_AN_EPITHELIUM	CTNNB1;AGTR2;STOX1;GJA1;HOXB7;AR;ITGAX;LIF;MDK;WNT4;LGR4;SOX9;VEGFA;PAX8	8.30518	7.37e-08
GOBP_MAMMARY_GLAND_DUCT_MORPHOGENESIS	KDM5B;PHB2;CSF1R;EPHA2;ESR1;AR;AREG;MSX2;PGR;WNT4;PTCH1;TBX3;DDR1	9.42383	7.45e-08
GOBP_POSITIVE_REGULATION_OF_CELL_SUBSTRATE_JUNCTION_ORGANIZATION	FERMT2;COL16A1;LIMS1;PIK3R1;WNT4;RAC1;ROCK1;S100A10;SDC4;SFRP1;THY1;VEGFA;NRP1	9.42383	7.45e-08
GOBP_DEFENSE_RESPONSE_TO_GRAM_POSITIVE_BACTERIUM	CHGA;ROMO1;DEFB1;EPHA2;FAU;MPEG1;FGR;GBP2;ANG;PYCARD;HLA-A;HLA-E;HMGB2;IL1B;IL7R;IL18;LYZ;PLA2G2A;STAB2;RARRES2;RNASE4;RNASE6;RPL39;TLR2;TNF;C5AR1;CD36	3.7982	7.72e-08
GOBP_RESPONSE_TO_FIBROBLAST_GROWTH_FACTOR	SPRY1;CXCL13;KDM5B;COL1A1;CCN2;CTNNB1;EGR3;FGF7;SULF1;GALNT3;GCLC;GCLM;GRB2;NR4A1;CXCL8;WNT4;CCL2;CCL5;SFRP1;ZFP36L1;ZFP36L2;THBS1;ZFP36;FUZ;CHURC1;IER2;CD44	3.7982	7.72e-08
GOBP_MEMBRANE_PROTEIN_ECTODOMAIN_PROTEOLYSIS	ADRA2A;BACE2;RBMX;APOE;IL1B;IL10;MMP7;PSENEN;ROCK1;TIMP1;TIMP2;TIMP3;TNF;TNFRSF1B;HM13;SPPL2A	6.73875	7.84e-08
GOBP_REGULATION_OF_TOLL_LIKE_RECEPTOR_SIGNALING_PATHWAY	IRAK3;SLC15A4;CYBA;DDX3X;ESR1;GPS2;HMGB1;BIRC3;IRF1;LTF;ARRB2;NINJ1;LGR4;RTN4;PELI1;PTPRS;TLR2;TNFAIP3;CAV1;CD14;CD36	4.81506	8.17e-08
GOBP_CALCIUM_MEDIATED_SIGNALING	CIB1;RCAN3;CLIC2;EFHB;DEFB1;RCAN1;EDN1;EDNRB;ERBB3;PTK2B;NR5A1;GBP1;LMCD1;HINT1;IGF1;CXCL8;ATP1B1;ATP2A2;FIS1;TMBIM4;PLEK;PPP1R9A;PTPRC;SELENOK;CCL3;CCL4;CCL20;CLEC7A;TNF;VCAM1;CXCR4;CALM1;CALM2;SPHK1;CCRL2;JPT2;EIF2AK3;HOMER2	2.92948	8.18e-08
GOBP_CARBOHYDRATE_DERIVATIVE_CATABOLIC_PROCESS	OGA;CHI3L1;CHIT1;CST3;CTSL;AHCY;ALDH1A1;ENPP4;FUCA1;SAMHD1;GLA;GPD1;NT5C;HINT1;AOAH;ITPA;MANBA;MGAT1;NEU1;PNP;NT5E;OVGP1;DERA;PDE4A;PDE4B;ADA2;STAB2;TGFB1;UPP1;DCTPP1;SUCLG2;SUCLG1;CD44;GDA	3.15834	8.32e-08
GOBP_POSITIVE_REGULATION_OF_PROTEOLYSIS_INVOLVED_IN_PROTEIN_CATABOLIC_PROCESS	TRIB1;STUB1;RACK1;CTSC;GABARAP;CLU;PLK3;DAB2;PTK2B;HSPBP1;RNF144B;ARIH1;RNF19A;NUPR1;GCLC;NOP53;HSPA1A;HSPA1B;MDM2;NFE2L2;SUMO2;ELOB;SUMO1;LAPTM5;CAV1;ZFAND2A;ATP5IF1;HERPUD1;RBX1	3.54706	9.04e-08
GOBP_CARDIAC_NEURAL_CREST_CELL_MIGRATION_INVOLVED_IN_OUTFLOW_TRACT_MORPHOGENESIS	SEMA3C;EDN1;EDNRA;ENG;FOLR1;TWIST1;HAND2;CDC42	34.7291	9.11e-08
GOBP_NEGATIVE_REGULATION_OF_PROTEIN_SERINE_THREONINE_KINASE_ACTIVITY	HIPK3;SPRY1;CDKN1A;CDKN1C;HEXIM1;PKIG;IRAK3;GADD45A;DUSP1;CHORDC1;PDCD4;PYCARD;GSTP1;HMGCR;DNAJA1;APOE;IL1B;PRKAR1A;HEG1;PTPN1;RGS2;SFRP1;SFRP2;SORL1;NR2F2;TNFAIP3;CAV1	3.75778	9.26e-08
GOBP_MESENCHYMAL_CELL_PROLIFERATION	OSR1;CTNNB1;FGF7;GPC3;IHH;LMNA;MSX1;MYC;NFIB;PRRX1;SOX9;ZEB1;WNT2;IRS2;HAND2	7.25186	9.61e-08
GOBP_TRANSFORMING_GROWTH_FACTOR_BETA_PRODUCTION	CD24;COL3A1;FN1;CD2AP;GATA6;HIF1A;HSP90AB1;ITGB8;LTBP1;LUM;CD46;LAPTM4B;PTGS2;THBS1;TYROBP	7.25186	9.61e-08
GOBP_REGULATION_OF_RESPONSE_TO_REACTIVE_OXYGEN_SPECIES	RACK1;FBLN5;PARK7;ENDOG;FOXO3;GCH1;H19;IL10;MET;NFE2L2;DDR2;PAWR;TXN;NR4A3;CD36	7.25186	9.61e-08
GOBP_POSITIVE_REGULATION_OF_LYMPHOCYTE_MIGRATION	CXCL13;CORO1A;AIF1;PTK2B;ABL2;PYCARD;RHOA;NEDD9;SELENOK;CCL3;CCL4;CCL5;CCL20;CCL21;CXCL12	7.25186	9.61e-08
GOBP_CELL_CYCLE_G1_S_PHASE_TRANSITION	CDKN1A;CDK2AP2;GPNMB;PHB2;PLK3;DDX3X;EIF4E;AIF1;STOX1;PLCB1;KANK2;RGCC;GPR132;ANXA1;APEX1;ID2;ID4;ITGB1;MDM2;MLF1;MN1;MUC1;MYC;NASP;DDR2;RPS27L;KMT2E;TCIM;PSME1;PSME2;RHOU;RBBP8;CCND1;BCL2;ACTB;RPL26;RPS6;CCL2;BID;SMARCE1;WEE1;TMEM14B;CCND2;CCNH;KLF4;ADAMTS1	2.59008	9.62e-08
GOBP_ESTABLISHMENT_OF_CELL_POLARITY	SPRY1;RACK1;SDCCAG8;PTK2B;FOXJ1;FRMD4B;WWC1;FAM89B;GJA1;ABL2;CRB2;GSN;HES1;HSP90AA1;HSP90AB1;ITGB1;RHOA;LLGL2;MAP1B;MAP4;MSN;SHTN1;RAP1B;ROCK1;CCL21;DYNLT1;EZR;WEE1;CYTH1;SLC9A3R1;CDC42	3.35401	9.7e-08
GOBP_CELLULAR_IRON_ION_HOMEOSTASIS	CP;CYB561;ALAS2;FTH1;FTL;SLC40A1;HIF1A;LCN2;MYC;ATP6V1A;SLC39A8;SLC11A1;SOD1;SRI;TFRC;CYBRD1;NCOA4;ATP6V0D1;ATP6V1G1	5.28092	1.05e-07
GOBP_CARDIAC_SEPTUM_DEVELOPMENT	CITED2;SEMA3C;CNTRL;ADAMTS6;JAG1;ENG;GATA4;GATA6;GJA5;HES1;CCN1;RBPJ;LRP2;MDM2;MSX2;HEG1;PRDM1;SLIT3;SOX4;TBX3;PAX8;DNAH11;NRP1;DHRS3;MATR3	3.98777	1.06e-07
GOBP_RESPONSE_TO_INCREASED_OXYGEN_LEVELS	PDPN;COL1A1;FOXO1;MMP2;MT-ATP6;ATP6V1A;SOD2;SLC7A5;CAT;CAV1;ATP6V0D1;ATP6V1G1	10.4357	1.09e-07
GOBP_REGULATION_OF_ACUTE_INFLAMMATORY_RESPONSE	PARK7;NLRP3;C2CD4A;EDNRB;ALOX5AP;GSTP1;HLA-E;IL1B;IL6ST;C2CD4B;OSM;SELENOS;PTGER3;PTGS2;TNF;C3	6.52801	1.1e-07
GOBP_OSTEOCLAST_DIFFERENTIATION	CEBPB;CSF1R;CTNNB1;GPR183;EPHA2;FBN1;FOS;GPC3;ANXA2;JUNB;LTF;MITF;NEDD9;PIK3R1;CCL3;SFRP1;TFRC;KLF10;TNF;TNFAIP6;TYROBP;PRXL2A;SH3PXD2A;CD81	4.12959	1.1e-07
GOBP_CELLULAR_RESPONSE_TO_CADMIUM_ION	CYBB;DAXX;FOS;JUN;MT1E;MT1F;MT1G;MT1H;MT1M;MT1X;MT2A;SOD1;SUMO1;AKR1C3	7.94379	1.11e-07
GOBP_POSITIVE_REGULATION_OF_RECEPTOR_MEDIATED_ENDOCYTOSIS	AP2M1;CLU;DAB2;ANXA2;HNRNPK;INSR;ARRB2;SERPINE1;AHI1;PPT1;B2M;BICD1;CCL21;SFRP4;C3;VEGFA;CD63	6.00105	1.15e-07
GOBP_NEGATIVE_REGULATION_OF_COAGULATION	PROCR;EDN1;ALOX12;ANXA2;ANXA5;APOE;SERPINE1;SERPINB2;PDGFRA;PLAT;PLAUR;TFPI;THBD;THBS1;SERPING1;TSPAN8;CD9	6.00105	1.15e-07
GOBP_REGULATION_OF_HORMONE_SECRETION	KDM5B;CHGA;ADRA2A;DAB2;EDN1;ACSL4;FOXO1;MPC2;GJA1;SERP1;GLUL;ANXA1;HIF1A;HLA-DRB1;ICA1;IL1B;LEP;LIF;PIM3;OSM;PFKL;RFX3;CCL5;SFRP1;SCG5;SLC16A1;SOX4;SPP1;SRI;TSPO;TMF1;TNF;TRH;UCP2;PAX8;RAB11FIP1;IRS2;VAMP8;MIDN;AIMP1;HMGN3	2.74229	1.23e-07
GOBP_NEGATIVE_REGULATION_OF_MITOTIC_CELL_CYCLE	CDKN1A;CDK2AP2;CDKN1C;GPNMB;BTG3;PLK3;CTNNB1;DUSP1;SYF2;KANK2;GAS1;RGCC;GPR132;NOP53;IK;IL10;MDM2;MUC1;RPS27L;TAOK3;MAP3K20;AURKAIP1;USP47;PPP1R10;RBBP8;CCND1;BCL2;RPL26;CCL2;NABP1;STK33;ZFP36L1;ZFP36L2;BTG1;TNF;WEE1;BTG2;NEK11;CCNG1;KLF4;TRIP13;SLC9A3R1	2.6994	1.27e-07
GOBP_RESPONSE_TO_RETINOIC_ACID	PHB2;COL1A1;OSR1;CTSH;PTK2B;DKK1;GATA6;ABL2;GJB2;IGFBP2;IGFBP7;AQP3;LEP;MMP2;NDUFA13;SERPINF1;PTCH1;RORB;SOX9;TFRC;TNF;WNT2;ALDH1A2;KLF4;HAND2	3.93874	1.29e-07
GOBP_POSITIVE_REGULATION_OF_CANONICAL_WNT_SIGNALING_PATHWAY	COL1A1;DDX3X;DLX5;GPC3;RBPJ;ILK;JUP;NFKB1;USP47;LGR4;VPS35;RPS12;SFRP1;SFRP2;SFRP4;SOX4;TGFB1;UBE2B;TTC21B;WLS;LGR5;CAV1;RUVBL1;SEMA5A;ZEB2	3.93874	1.29e-07
GOBP_STEM_CELL_PROLIFERATION	N4BP2L2;FERMT2;OSR2;CTNNB1;MECOM;FBLN1;GJA1;SFN;HMGB2;HNRNPU;ID4;RBPJ;IRF6;EPCAM;NFIB;PBX1;PIM1;PRRX1;PTCH1;PTPRC;SFRP2;SOX17;SNAI2;SOX9;ZFP36L1;TBX3;IRS2	3.67945	1.32e-07
GOBP_RESPONSE_TO_LEUKEMIA_INHIBITORY_FACTOR	KDM5B;EIF4A2;EPS8;CACYBP;GCLM;HNRNPU;ICAM1;JARID2;MAT2A;NCL;RFX2;RPS16;SRSF3;SRSF7;SOX17;SRM;KLF5;TFRC;EFHC2;ARID5B;SOCS3;KLF4;EEF1E1;SPOCK2	4.07592	1.35e-07
GOBP_MESONEPHRIC_TUBULE_MORPHOGENESIS	OSR1;CTNNB1;AGTR2;GPC3;HOXB7;HES1;ILK;LAMA5;TACSTD2;MYC;PBX1;WNT4;LGR4;PTCH1;BCL2;SOX9;HNF1B;VEGFA;PAX8	5.17107	1.36e-07
GOBP_RESPONSE_TO_OSMOTIC_STRESS	NLRP3;PLK3;DDX3X;TSC22D3;PTK2B;PYCARD;HSP90AA1;HSP90AB1;SERPINB6;ERRFI1;PTGS2;SLC2A1;SORD;ZFP36L1;TSPO;TNF;EFHD1;YBX3;KMO;MAP7;CLDN1;ARHGEF2	4.42417	1.37e-07
GOBP_VASCULAR_TRANSPORT	FABP5;SLC44A1;APOE;INSR;LEPR;LRP1;LRP2;SLC38A2;SLC1A1;SLC2A1;SLC2A3;SLC5A3;SLC6A6;SLC7A2;SLC16A1;SLC22A5;TFRC;SLC7A5;MFSD2A;ABCC3;SLC9A3R1;CD36	4.42417	1.37e-07
GOBP_REGULATION_OF_VIRAL_GENOME_REPLICATION	TNIP1;IFITM3;IFITM2;DDX3X;PABPC1;IFI16;CXCL8;ISG20;LTF;PLSCR1;PPIA;PPID;RESF1;ZC3HAV1;BCL2;CCL5;SLPI;STAU1;BST2;TNF;IFITM1;BANF1	4.42417	1.37e-07
GOBP_SUPEROXIDE_ANION_GENERATION	CYBA;CYBB;EDN1;ALOX12;GNAI2;GSTP1;ITGAM;ITGB2;NCF2;CLEC7A;SOD1;SOD2;TGFB1;TYROBP;SH3PXD2A	6.9927	1.38e-07
GOBP_MITOCHONDRIAL_TRANSLATION	MRPL54;CHCHD1;MRPL52;MRPS28;COA3;MRPL42;MRPL13;MRPL18;NDUFA7;MRPS18C;MRPS2;MRPL51;NGRN;MRPS33;AURKAIP1;MRPL20;MRPL23;MRPS12;MRPL14;MRPS24;MRPS9;MRPS6;MRPL40;MRPL36;TUFM;MRPL57;GADD45GIP1;MRPL33	3.55695	1.42e-07
GOBP_EAR_DEVELOPMENT	CEBPD;IFT27;TRIOBP;CTHRC1;OSR2;COL11A1;OSR1;DLX5;JAG1;EDN1;EDNRA;STOX1;ALDH1A3;RPGRIP1L;GATA2;GJB2;HES1;RBPJ;INSIG1;MAF;MSX1;MYO6;PRRX1;AHI1;BCL2;RPL38;SDC4;SOD1;SOX9;TBX3;ZEB1;TWIST1;DDR1;PAX8;CEP290;SLC44A4;IFT88;LGR5;SLC9A3R1	2.8082	1.44e-07
GOBP_BRANCHING_INVOLVED_IN_MAMMARY_GLAND_DUCT_MORPHOGENESIS	KDM5B;PHB2;EPHA2;ESR1;AR;AREG;MSX2;PGR;WNT4;TBX3;DDR1	11.9541	1.46e-07
GOBP_REGULATION_OF_LYMPHOCYTE_MEDIATED_IMMUNITY	NLRP3;SLC15A4;CD55;AHR;ZBTB1;FOXJ1;CADM1;HLA-A;HLA-B;HLA-DRA;HLA-DRB1;HLA-E;HMGB1;HSPD1;IL1B;IL1R1;IL7R;IL10;IL18;LEP;ARRB2;CD46;SERPINB9;B2M;PTPRC;NECTIN2;TFRC;TGFB1;TNF;TNFRSF1B;C3;C4BPA;WAS;CD81	3.07091	1.47e-07
GOBP_STEROID_BIOSYNTHETIC_PROCESS	ADM;DAB2;EGR1;FDFT1;FDPS;FDXR;NR5A1;HMGCR;HMGCS1;APOE;IGFBP7;IL1A;INSIG1;LEP;ASAH1;ATP1A1;NFKB1;PBX1;CYB5R1;WNT4;POR;PRLR;SCP2;SNAI2;SOD1;SQLE;STAR;TSPO;TNF;SRD5A3;HINT2;AKR1C3;MBTPS1;CH25H	3.07091	1.47e-07
GOBP_PEPTIDYL_PROLINE_MODIFICATION	PPIF;PRDX4;FKBP1A;FKBP2;FKBP5;PPIL6;NTMT1;NKTR;P4HB;P4HTM;PPIA;PPIB;PPIC;PPID;RANBP2;PPIG	6.33005	1.52e-07
[truncated: 367 more rows]
