# Supplementary material for: Molecular Mechanisms of Endometriosis Revealed Using Omics Data
Source: Biomedicines. 2023 Aug 7;11(8):2210. doi: 10.3390/biomedicines11082210 (PMC10452455; doi:10.3390/biomedicines11082210)
Supplement: Supplementary file 1 [file biomedicines-11-02210-s001.zip › Supplementary Table S12.xlsx]

## Sheet: scs.genes.kegg.sig.re
KEGG pathway	Gene	OR	pval
KEGG_RIBOSOME	RPL35;RPL23;RPL3;RPL31;RPL4;RPL5;RPL32;RPS10;RPL34;RPS11;RPS12;RPL36AL;RPS13;RPL35A;RPL37A;RPS15;RPL37;RPL38;RPL14;RPS15A;FAU;RPSA;RPS16;RPL27;RPS17;RPL26;RPL24;RPL29;RPL28;RPL27A;UBA52;RPL30;RPL36;RPS20;RPS19;RPS18;RPS4X;RPS5;RPL22L1;RPL26L1;RPS6;RPLP2;RPL22;RPL23A;RPL18;RPL18A;RPL19;RPL21;RPS3A;RPL10A;RPS27L;RPS3;RPS2;MRPL13;RPL17;RPL15;RPL36A;RPL12;RPL13;RPL41;RPL10;RPL39;RPL11;RPL8;RPL9;RPL13…	280.517	3.24e-91
KEGG_OXIDATIVE_PHOSPHORYLATION	ATP6V1G1;UQCR10;NDUFA5;NDUFA4;PPA2;ATP5MF;NDUFS7;MT-CYB;ATP6V0B;ATP5PO;MT-CO2;MT-CO1;MT-CO3;COX5B;COX4I1;MT-ATP6;MT-ATP8;ATP5PD;NDUFA2;NDUFA3;NDUFA1;UQCRQ;ATP5F1D;ATP5MC3;ATP6V1C2;ATP5MC2;ATP5MC1;ATP5PB;ATP5F1E;COX5A;ATP6V1D;ATP5F1A;ATP5PF;ATP5ME;SDHA;ATP6V1A;ATP6V1B2;ATP6V0C;COX8A;COX7C;SDHC;COX7B;COX7A2;COX6C;COX17;ATP5F1B;COX6B1;ATP5F1C;ATP6V1F;UQCRB;ATP6V0D1;COX6A1;UQCRH;UQCRC2;NDUFB3;NDUFB1;…	22.5909	3.75e-61	KEGG: Koyto Encyclopedia of Genes and Genomics
KEGG_PARKINSONS_DISEASE	UQCR10;NDUFA5;NDUFA4;NDUFS7;MT-CYB;MT-CO2;ATP5PO;MT-CO1;MT-CO3;COX5B;COX4I1;MT-ATP6;MT-ATP8;ATP5PD;NDUFA2;NDUFA3;NDUFA1;VDAC1;VDAC2;VDAC3;UQCRQ;ATP5F1D;ATP5MC3;ATP5MC2;ATP5MC1;ATP5PB;ATP5F1E;COX5A;SLC25A6;SLC25A5;ATP5F1A;SLC25A4;ATP5PF;CYCS;SDHA;SLC18A2;COX8A;COX7C;PPID;SDHC;COX7B;COX7A2;COX6C;ATP5F1B;COX6B1;ATP5F1C;UBB;UQCRB;COX6A1;UQCRH;UQCRC2;NDUFB3;NDUFB1;NDUFB2;NDUFAB1;MT-ND6;MT-ND5;NDUFA7;N…	19.3397	5.47e-54	Gene: common genes between input genes and genes of a gene set
KEGG_HUNTINGTONS_DISEASE	POLR2G;UQCR10;NDUFA5;NDUFA4;POLR2I;POLR2J;NDUFS7;MT-CYB;POLR2K;ATP5PO;MT-CO2;MT-CO1;DNALI1;POLR2L;MT-CO3;COX5B;COX4I1;MT-ATP6;MT-ATP8;ATP5PD;NDUFA2;NDUFA3;NDUFA1;DNAI1;VDAC1;VDAC2;VDAC3;UQCRQ;ATP5F1D;ATP5MC3;ATP5MC2;ATP5MC1;ATP5PB;ATP5F1E;COX5A;SLC25A6;ATP5F1A;SLC25A5;SLC25A4;ATP5PF;CYCS;TGM2;SDHA;DNAL1;DNAL4;COX8A;COX7C;PLCB1;PLCB4;DNAI2;IFT57;CREB3L4;PPID;SDHC;COX7B;COX7A2;COX6C;ATP5F1B;SOD1;CO…	12.4957	1.75e-51	OR: odds ratio
KEGG_ALZHEIMERS_DISEASE	UQCR10;CALM2;NDUFA5;NDUFA4;CALM1;EIF2AK3;ATP2A2;NDUFS7;MT-CYB;BACE2;ATP5PO;MT-CO2;MT-CO1;MME;MT-CO3;COX5B;PSENEN;LRP1;COX4I1;APOE;MT-ATP6;MT-ATP8;ATP5PD;NDUFA2;NDUFA3;NDUFA1;CAPN2;LPL;UQCRQ;ATP5F1D;GAPDH;ATP5MC3;ATP5MC2;ATP5MC1;ATP5PB;ATP5F1E;COX5A;ERN1;ATP5F1A;ATP5PF;CYCS;SDHA;COX8A;COX7C;PLCB1;PLCB4;TNF;SDHC;COX7B;COX7A2;COX6C;ATP5F1B;COX6B1;BID;ATP5F1C;TNFRSF1A;UQCRB;COX6A1;UQCRH;UQCRC2;NDUFB3…	12.0863	1.08e-45
KEGG_FOCAL_ADHESION	JUN;FN1;IGF1;BIRC3;COMP;ROCK1;RELN;LAMC2;MYL12A;LAMB3;LAMA4;LAMA5;LAMB1;CAPN2;FLNC;FLNA;FLNB;MET;COL11A1;THBS2;THBS1;VWF;ZYX;ACTN4;ACTN1;MAPK10;MAP2K1;ILK;RAPGEF1;GRB2;PPP1CB;ACTG1;CTNNB1;MYL12B;ACTB;RAP1A;RAP1B;CAV1;TLN1;COL6A2;COL6A3;COL5A2;COL6A1;ITGA3;ITGA5;COL5A1;COL3A1;COL4A1;COL4A2;ITGB4;VASP;ITGB1;SPP1;COL1A1;COL1A2;VCL;VEGFA;ITGB8;CCND1;BCL2;PDGFRA;CCND2;CDC42;MYL9;RHOA;RAC2;PPP1CA;RAC1;…	7.58115	2.33e-32
KEGG_LEUKOCYTE_TRANSENDOTHELIAL_MIGRATION	AFDN;ITGAM;ROCK1;MMP2;NCF2;VASP;VCAM1;ITGB1;MYL12A;THY1;ITGB2;CTNNA1;VCL;GNAI2;CTNND1;EZR;CXCL12;PTK2B;CDC42;CLDN10;MYL9;CLDN1;ICAM1;RHOA;CXCR4;ACTN4;ACTN1;F11R;RAC2;CLDN15;CD99;ACTG1;RAC1;RASSF5;CTNNB1;CLDN7;MYL12B;CLDN4;CLDN3;ACTB;RAP1A;RAP1B;MSN;CYBA;CYBB;PIK3R1	8.7821	3.13e-23
KEGG_PATHOGENIC_ESCHERICHIA_COLI_INFECTION	TUBA1A;KRT18;WAS;CLDN1;TUBB4B;TUBB3;RHOA;CTTN;ROCK1;LY96;TUBA1B;CD14;ARPC5;ITGB1;ARPC1B;ARPC3;ACTG1;ARPC2;NCL;YWHAQ;CTNNB1;TUBA1C;ACTB;HCLS1;EZR;ARHGEF2;TUBB6;TUBB;YWHAZ;CDC42;CDH1	16.2701	2.43e-21
KEGG_PATHWAYS_IN_CANCER	JUN;STAT3;FN1;BIRC3;IGF1;JUP;GSTP1;PTGS2;HIF1A;LAMC2;LAMB3;LAMA4;LAMA5;NFKB2;LAMB1;NFKB1;CTNNA1;NFKBIA;TPM3;MYC;CSF1R;CCDC6;NCOA4;CSF2RA;TGFB1;RBX1;HSP90B1;MET;FOXO1;CSF3R;PAX8;FGF7;MAPK10;MAP2K2;MECOM;MAP2K1;GRB2;WNT4;WNT2;RASSF5;CTNNB1;CCNA1;STK4;RALGDS;PTCH1;MITF;FOS;ITGA3;MMP2;COL4A1;COL4A2;SPI1;MDM2;ITGB1;DAPK1;VEGFA;HSP90AA1;CCND1;BCL2;PDGFRA;HSP90AB1;CYCS;CDC42;CDH1;ZBTB16;SLC2A1;RHOA;ELOB…	4.04276	1.89e-20
KEGG_ECM_RECEPTOR_INTERACTION	COL6A2;COL6A3;COL5A2;COL6A1;VWF;FN1;COMP;CD36;ITGA3;ITGA5;COL5A1;COL3A1;COL4A1;COL4A2;ITGB4;RELN;LAMC2;ITGB1;SPP1;LAMB3;COL1A1;LAMA4;LAMA5;LAMB1;COL1A2;CD47;CD44;TNXB;ITGB8;ITGA6;COL11A1;SDC2;SDC4;THBS2;THBS1	9.38012	1.04e-18
KEGG_LEISHMANIA_INFECTION	JUN;TNF;ITGAM;HLA-DMB;HLA-DMA;NCF2;PTGS2;IL1A;ITGB1;ITGB2;FCGR3B;NFKB1;FCGR2A;IL10;NFKBIA;MARCKSL1;HLA-DRB5;TGFB1;IFNGR1;IL1B;IRAK1;HLA-DPA1;HLA-DPB1;HLA-DQA1;HLA-DQA2;HLA-DQB1;C3;TLR2;FOS;CYBA;HLA-DRB1;HLA-DRA	10.4973	3.03e-18
KEGG_VIRAL_MYOCARDITIS	ICAM1;CXADR;HLA-C;HLA-B;HLA-DMB;HLA-DMA;HLA-A;RAC2;BID;ABL2;EIF4G2;ITGB2;ACTG1;RAC1;HLA-DRB5;CD55;ACTB;HLA-E;CCND1;HLA-DPA1;HLA-DPB1;HLA-DQA1;HLA-DQA2;HLA-DQB1;CAV1;MYH2;CYCS;MYH11;MYH10;HLA-DRB1;HLA-DRA	10.4269	1.15e-17
KEGG_SPLICEOSOME	LSM5;HNRNPA3;SF3B1;SRSF9;HSPA8;LSM7;RBMX;LSM4;EIF4A3;RBM25;SNU13;DDX39B;SF3B5;HNRNPU;HNRNPK;TRA2A;HSPA1B;HSPA1A;HNRNPC;DDX5;HSPA6;SNRPG;SNRPE;SNRPF;SNRPD2;SYF2;HNRNPA1;LSM3;BUD31;RBM8A;SRSF7;SNRPB;TRA2B;SNRPB2;SRSF5;PCBP1;SF3B6;SRSF3;SNRPD1;SNRPC;SRSF2	6.26697	6.45e-17
KEGG_CELL_ADHESION_MOLECULES_CAMS	ITGAM;CADM1;VCAM1;ITGB1;ITGB2;CDH2;HLA-DRB5;NRXN3;ALCAM;ITGB8;VCAN;HLA-E;HLA-DPA1;HLA-DPB1;HLA-DQA1;HLA-DQA2;HLA-DQB1;SDC2;SDC4;HLA-DRB1;NECTIN2;CDH1;HLA-DRA;CLDN10;ICAM3;CLDN1;ICAM1;HLA-C;HLA-B;HLA-DMB;HLA-DMA;HLA-A;F11R;PTPRF;CLDN15;CD99;PTPRC;NEGR1;CLDN7;CLDN4;CLDN3;ITGA6	6.06907	6.69e-17
KEGG_ANTIGEN_PROCESSING_AND_PRESENTATION	LGMN;CTSS;HLA-C;HLA-B;HLA-DMB;HLA-DMA;HLA-A;HSPA1B;HSPA1A;HSPA5;CD74;CTSL;IFI30;HSPA6;HLA-DRB5;HSPA8;CANX;HSP90AA1;CTSB;HLA-E;CALR;HLA-DPA1;HLA-DPB1;HLA-DQA1;PDIA3;HLA-DQA2;HLA-DQB1;PSME1;PSME2;HSP90AB1;B2M;HLA-DRB1;HLA-DRA	7.87267	4.35e-16
KEGG_COMPLEMENT_AND_COAGULATION_CASCADES	VWF;PLAT;F3;SERPINA1;PLAUR;TFPI;A2M;C7;CD59;SERPINA5;CD55;C6;C5AR1;C4BPA;C4B;C4A;CFH;CFB;CD46;SERPINE1;C1S;C3AR1;C3;CFD;C1R;CFI;SERPING1;MASP2;THBD	9.50425	7.15e-16
KEGG_MAPK_SIGNALING_PATHWAY	JUN;JUND;GADD45B;MAP3K20;STMN1;MAP3K5;MAP3K8;ARRB2;CD14;NFKB2;NFKB1;MYC;FLNC;FLNA;FLNB;PRKX;DUSP1;DUSP2;TGFB1;DUSP6;MAP3K2;FGF7;IL1R2;MAPK10;RASGRP2;PLA2G2A;MAP2K2;MAP2K3;MECOM;PLA2G5;MAP2K1;MAP2K6;GRB2;STK4;RAP1A;RAP1B;FOS;RPS6KA5;IL1A;DAXX;GADD45G;HSPA8;HSPB1;GADD45A;PDGFRA;CDC42;TNF;HSPA1B;RAC2;HSPA1A;TNFRSF1A;HSPA6;RAC1;RRAS;TAOK3;IL1B;IL1R1;NR4A1	3.65731	1.91e-14
KEGG_REGULATION_OF_ACTIN_CYTOSKELETON	BRK1;FN1;ENAH;ROCK1;CD14;ARPC5;MYL12A;ARPC1B;ARPC3;PFN1;PFN2;CFL1;MYH10;FGF7;WAS;ACTN4;ACTN1;MAP2K2;MAP2K1;PPP1CB;ACTG1;MYL12B;ACTB;MSN;IQGAP2;ITGAM;ITGA3;ITGA5;WASF2;ITGB4;ITGB1;ITGAX;ITGB2;VCL;ITGB8;PDGFRA;TMSB4X;EZR;CDC42;MYL9;RHOA;RAC2;PPP1CA;ARPC2;RAC1;GSN;RRAS;ITGA6;MYLK3;PIK3R1	4.06195	4.09e-14
KEGG_TIGHT_JUNCTION	AFDN;YBX3;MAP3K20;EPB41L3;CTTN;MYL12A;CTNNA1;LLGL2;PARD6B;GNAI2;VAPA;CSNK2B;MYH2;MYH11;MYH10;CDC42;CLDN10;CGN;MYL9;TJP2;CLDN1;RHOA;ACTN4;ACTN1;F11R;CLDN15;ACTG1;RAB13;CTNNB1;RRAS;CLDN7;MYL12B;CLDN4;CLDN3;ACTB;TJP1;HCLS1;EPB41L2	5.36554	4.23e-14
KEGG_CARDIAC_MUSCLE_CONTRACTION	COX8A;UQCR10;COX7C;FXYD2;ATP2A2;TPM2;MT-CYB;TPM1;ATP1B3;ATP1B1;MT-CO2;COX7B;MT-CO1;COX7A2;COX6C;MT-CO3;COX6B1;COX5B;COX4I1;ATP1A1;UQCRB;TPM4;COX6A1;UQCRH;UQCRC2;TPM3;UQCR11;UQCRQ;COX5A	7.60121	4.94e-14
KEGG_ADHERENS_JUNCTION	AFDN;SORBS1;WAS;SNAI2;RHOA;ACTN4;ACTN1;WASF2;RAC2;PTPRF;ACTG1;INSR;CTNNA1;RAC1;VCL;CTNNB1;CTNND1;CSNK2B;ACTB;TJP1;MET;LMO7;ACP1;PTPN1;CDC42;NECTIN2;CDH1	7.68814	2.95e-13
KEGG_LYSOSOME	SLC11A1;PPT1;CTSZ;ATP6V0B;LGMN;CTSS;LAPTM5;CTSL;CTSK;CTSH;LAPTM4A;CTSC;CD164;CTSD;CTSB;ASAH1;ATP6V0C;NEU1;M6PR;GLA;FUCA1;NPC2;ATP6V0D1;AP1M2;CD68;CD63;MANBA;PSAP;LIPA;AP1S2;LAPTM4B;CTSA;CLTA;CLTB	5.18479	1.89e-12
KEGG_CHEMOKINE_SIGNALING_PATHWAY	STAT3;CCL3L1;CCL2;CCL3;CCL5;CCL4;ROCK1;CXCL14;ARRB2;CCL20;CCL21;NFKB1;NFKBIA;GNG5;FGR;GNB2;PRKX;GNG10;GNAI2;GNG11;CCL4L2;FOXO3;CXCL12;PTK2B;CDC42;PLCB1;CXCL1;PLCB4;WAS;RHOA;CXCR4;HCK;CXCL8;RAC2;RASGRP2;MAP2K1;GRB2;RAC1;CXCL13;RAP1A;RAP1B;CXCL2;CXCL3;PIK3R1	3.98752	2.15e-12
KEGG_TYPE_I_DIABETES_MELLITUS	HLA-DRB5;TNF;ICA1;HLA-C;HLA-B;IL1B;HLA-DMB;HLA-DMA;HLA-E;HLA-A;HLA-DPA1;HLA-DPB1;HLA-DQA1;HLA-DQA2;CPE;HLA-DQB1;IL1A;HSPD1;HLA-DRB1;HLA-DRA	11.3701	2.17e-12
KEGG_VIBRIO_CHOLERAE_INFECTION	ATP6V1G1;SEC61B;TJP2;KDELR2;ATP6V0B;ATP6V1F;ATP6V0D1;ARF1;ACTG1;SEC61G;PRKX;KDELR1;ATP6V0E1;ATP6V1C2;ACTB;TJP1;GNAS;ATP6V1D;ATP6V1A;ATP6V1B2;SEC61A1;ATP6V0C	8.99411	4.7e-12
KEGG_NEUROTROPHIN_SIGNALING_PATHWAY	JUN;CALM2;CALM1;TP73;MAP3K5;RPS6KA5;NFKB1;NFKBIA;BEX3;BCL2;FOXO3;IRS2;YWHAZ;YWHAH;ARHGDIB;YWHAE;CDC42;RHOA;MAPK10;MAP2K2;MAP2K1;RAPGEF1;GRB2;RAC1;YWHAQ;IRAK2;IRAK1;RAP1A;RAP1B;IRAK3;PIK3R1	4.27485	8.59e-10
KEGG_GRAFT_VERSUS_HOST_DISEASE	HLA-DRB5;TNF;HLA-C;HLA-B;HLA-DMB;IL1B;HLA-DMA;HLA-E;HLA-A;HLA-DPA1;HLA-DPB1;HLA-DQA1;HLA-DQA2;HLA-DQB1;IL1A;HLA-DRB1;HLA-DRA	9.25332	9.04e-10
KEGG_EPITHELIAL_CELL_SIGNALING_IN_HELICOBACTER_PYLORI_INFECTION	JUN;ATP6V1G1;CXCL1;CCL5;ATP6V0B;CXCL8;F11R;MAPK10;ATP6V1F;ATP6V0D1;NFKB1;RAC1;NFKBIA;ATP6V0E1;ATP6V1C2;TJP1;MET;ATP6V1D;ATP6V1A;ATP6V1B2;CDC42;ATP6V0C	6.25423	9.08e-10
KEGG_HEMATOPOIETIC_CELL_LINEAGE	TNF;ITGAM;CD36;ITGA3;ITGA5;IL1R2;IL7R;MME;TFRC;IL1A;CD14;CSF1R;HLA-DRB5;CD59;CD9;CD44;CSF2RA;CD55;IL1B;IL1R1;ITGA6;CSF3R;CD37;HLA-DRB1;HLA-DRA	5.27582	1.12e-09
KEGG_ALLOGRAFT_REJECTION	HLA-DRB5;TNF;HLA-C;HLA-B;HLA-DMB;HLA-DMA;HLA-E;HLA-A;HLA-DPA1;HLA-DPB1;HLA-DQA1;HLA-DQA2;HLA-DQB1;IL10;HLA-DRB1;HLA-DRA	9.95035	1.34e-09
KEGG_ASTHMA	HLA-DRB5;TNF;FCER1G;HLA-DMB;FCER1A;HLA-DMA;HLA-DPA1;HLA-DPB1;HLA-DQA1;HLA-DQA2;HLA-DQB1;IL10;HLA-DRB1;HLA-DRA	11.4208	4.25e-09
KEGG_ENDOCYTOSIS	ADRB3;SMAP2;MDM2;RAB11FIP1;ARRB2;CSF1R;SH3GLB1;ARFGAP3;HSPA8;PARD6B;RAB31;RAB11A;CHMP4A;PDCD6IP;LDLR;CHMP5;MET;HLA-E;PDGFRA;EHD1;CDC42;CHMP1B;HLA-C;CXCR4;HLA-B;HLA-A;HSPA1B;ERBB3;HSPA1A;TFRC;PSD3;HSPA6;DAB2;AP2M1;CHMP2A;CLTA;CLTB	3.36845	5.5e-09
KEGG_P53_SIGNALING_PATHWAY	SFN;IGF1;GADD45B;IGFBP3;RRM2B;TP73;BID;MDM2;PMAIP1;PERP;GADD45G;CDKN1A;GADD45A;TNFRSF10B;CCND1;CD82;SERPINE1;CYCS;CCND2;CCNG1;THBS1	5.84034	5.63e-09
KEGG_CYTOKINE_CYTOKINE_RECEPTOR_INTERACTION	CCL3L1;TNFSF10;CCL2;CCL3;CCL5;CCL4;CCL20;CCL21;CSF1R;PRLR;CSF2RA;TGFB1;MET;CSF3R;CXCL12;CXCR4;IL1R2;LEPR;LEP;IL18;OSM;CXCL13;LIF;CXCL14;IL1A;VEGFA;CCL4L2;PDGFRA;CXCL1;TNF;IL7R;CXCL8;TNFRSF1B;TNFRSF1A;TNFRSF12A;IL10;IL10RA;IFNGR1;TNFRSF10B;IL1B;IL1R1;IL20RA;BMPR1B;IL6ST;CXCL2;CXCL3	2.7565	1.95e-08
KEGG_ARRHYTHMOGENIC_RIGHT_VENTRICULAR_CARDIOMYOPATHY_ARVC	JUP;LMNA;ATP2A2;ITGA3;ITGA5;ACTN4;DSG2;ACTN1;ITGB4;ITGB1;ACTG1;PKP2;CTNNA1;CDH2;CTNNB1;GJA1;ITGB8;ACTB;ITGA6;DSP;DES	5.17894	2.99e-08
KEGG_PROTEASOME	PSMA1;POMP;PSMA5;PSMD8;PSMA4;PSMA3;PSMA2;PSMB3;PSME1;PSMB5;PSME2;SEM1;PSMB6;PSMA6;PSMA7;PSMB1	6.96354	5.54e-08
KEGG_AXON_GUIDANCE	PLXNB2;ROCK1;PLXNB3;PLXNB1;SEMA3G;ITGB1;SRGAP3;CFL1;GNAI2;MET;SLIT3;SEMA3C;CXCL12;SEMA5A;CDC42;SEMA6B;EPHB6;RHOA;CXCR4;RAC2;EFNA1;NRP1;RAC1;SEMA3B;DPYSL2;ABLIM1;NTN4;EPHA2	3.62756	1.01e-07
KEGG_APOPTOSIS	TNF;TNFSF10;BIRC3;CFLAR;BID;IL1A;TNFRSF1A;ENDOG;NFKB1;NFKBIA;CAPN2;PRKX;TNFRSF10B;IL1B;IRAK2;IL1R1;IRAK1;BCL2;IRAK3;CYCS;PRKAR1A;PIK3R1	4.42417	1.37e-07
KEGG_TOLL_LIKE_RECEPTOR_SIGNALING_PATHWAY	JUN;CCL3;CCL5;CCL4;LY96;MAP3K8;CD14;CTSK;SPP1;NFKB1;NFKBIA;TNF;CXCL8;MAPK10;MAP2K2;MAP2K3;MAP2K1;MAP2K6;RAC1;IL1B;IRAK1;FOS;TLR2;PIK3R1	4.02362	1.64e-07
KEGG_NOD_LIKE_RECEPTOR_SIGNALING_PATHWAY	CXCL1;TNF;BIRC3;CCL2;CCL5;CXCL8;MAPK10;TNFAIP3;NFKB1;NFKBIA;IL18;HSP90AA1;PYCARD;IL1B;HSP90B1;NLRP3;CXCL2;HSP90AB1	5.3422	1.95e-07
KEGG_FC_GAMMA_R_MEDIATED_PHAGOCYTOSIS	SPHK1;WASF2;VASP;ARPC5;ARPC1B;ARPC3;FCGR2A;CFL1;CDC42;WAS;HCK;RAC2;MAP2K1;MARCKS;ARPC2;RAC1;PTPRC;MARCKSL1;GSN;PLPP3;PLPP1;PLPP2;PIK3R1	4.11914	2.08e-07
KEGG_GLUTATHIONE_METABOLISM	SRM;GSTP1;RRM2B;MGST2;LAP3;MGST1;MGST3;GSTA3;GGCT;GSTM3;GCLC;GSTK1;GPX3;IDH2;GPX4;GCLM	6.14421	2.09e-07
KEGG_PROTEIN_EXPORT	SRP9;SRP14;SEC61B;SEC61G;HSPA5;SEC11A;SPCS1;SEC11C;SPCS2;SEC62;SEC61A1	11.0345	2.53e-07
KEGG_VASCULAR_SMOOTH_MUSCLE_CONTRACTION	CALM2;CALD1;CALM1;PPP1R14A;ROCK1;MYL6B;EDNRA;PRKX;GUCY1A2;MYL6;GNAS;MYH11;PLCB1;PLCB4;MYL9;RHOA;PLA2G2A;MAP2K2;PLA2G5;MAP2K1;PPP1CA;PPP1CB;RAMP1;ACTA2;MYLK3	3.6322	4.62e-07
KEGG_TGF_BETA_SIGNALING_PATHWAY	TNF;COMP;RHOA;ROCK1;ID1;ID2;ID4;MYC;SKP1;TGFB1;ID3;SMAD5;RBX1;LTBP1;SMAD9;LEFTY2;BMPR1B;ZFYVE16;THBS2;DCN;THBS1	4.22183	4.93e-07
KEGG_INTESTINAL_IMMUNE_NETWORK_FOR_IGA_PRODUCTION	HLA-DRB5;TGFB1;CXCR4;HLA-DMB;HLA-DMA;PIGR;HLA-DPA1;HLA-DPB1;HLA-DQA1;HLA-DQA2;HLA-DQB1;CXCL12;IL10;HLA-DRB1;HLA-DRA	5.93169	7.06e-07
KEGG_PPAR_SIGNALING_PATHWAY	SORBS1;CD36;SCD;DBI;GK;PLTP;ILK;OLR1;LPL;SCP2;PLIN1;FABP5;FABP6;ACSL5;UBC;ACSL1;ACSL3;ACSL4	4.60897	1.12e-06
KEGG_SMALL_CELL_LUNG_CANCER	FN1;BIRC3;ITGA3;COL4A1;COL4A2;PTGS2;LAMC2;ITGB1;LAMB3;LAMA4;LAMA5;LAMB1;NFKB1;NFKBIA;MYC;ITGA6;CCND1;BCL2;CYCS;PIK3R1	4.08253	1.41e-06
KEGG_AUTOIMMUNE_THYROID_DISEASE	HLA-C;HLA-B;HLA-DMB;HLA-DMA;HLA-A;IL10;HLA-DRB5;HLA-E;HLA-DPA1;HLA-DPB1;HLA-DQA1;HLA-DQA2;HLA-DQB1;HLA-DRB1;HLA-DRA	5.29033	2.2e-06
KEGG_PRION_DISEASES	EGR1;PRKX;C6;CCL5;IL1B;SOD1;MAP2K2;HSPA1A;MAP2K1;IL1A;HSPA5;C7	6.8045	3.05e-06
KEGG_ADIPOCYTOKINE_SIGNALING_PATHWAY	STAT3;TNF;CD36;SLC2A1;MAPK10;TNFRSF1B;TNFRSF1A;LEPR;LEP;NFKB1;NFKBIA;SOCS3;ACSL5;IRS2;ACSL1;ACSL3;ACSL4	4.43871	3.36e-06
KEGG_SYSTEMIC_LUPUS_ERYTHEMATOSUS	FCGR3B;FCGR2A;C7;HLA-DRB5;C6;C4B;C4A;HLA-DPA1;HLA-DPB1;HLA-DQA1;HLA-DQA2;HLA-DQB1;C1S;C3;C1R;HLA-DRB1;HLA-DRA;TNF;HLA-DMB;HLA-DMA;ACTN4;ACTN1;IL10;SSB;SNRPB;SNRPD1	3.09017	3.61e-06
KEGG_PROSTATE_CANCER	IGF1;CREB3L4;GSTP1;MAP2K2;MAP2K1;MDM2;GRB2;NFKB1;NFKBIA;CDKN1A;CTNNB1;HSP90AA1;AR;HSP90B1;CCND1;BCL2;FOXO1;PDGFRA;HSP90AB1;PIK3R1	3.78574	3.68e-06
KEGG_BLADDER_CANCER	CDKN1A;VEGFA;CXCL8;CCND1;MMP2;MAP2K2;RPS6KA5;MAP2K1;MDM2;DAPK1;THBS1;MYC;CDH1	5.84691	4.37e-06
KEGG_DILATED_CARDIOMYOPATHY	TNF;IGF1;LMNA;ATP2A2;TPM2;ITGA3;TPM1;ITGA5;ITGB4;ITGB1;TPM4;ACTG1;TPM3;PRKX;TGFB1;ITGB8;ACTB;ITGA6;GNAS;DES	3.73166	4.41e-06
KEGG_GAP_JUNCTION	PLCB1;TUBA1A;PLCB4;TUBB4B;TUBB3;MAP2K2;MAP2K1;TUBA1B;GRB2;PRKX;GJA1;GNAI2;GUCY1A2;TUBA1C;TJP1;PDGFRA;GNAS;TUBB6;TUBB;MAP3K2	3.73166	4.41e-06
KEGG_RENAL_CELL_CARCINOMA	JUN;SLC2A1;ELOB;MAP2K2;MAP2K1;HIF1A;RAPGEF1;GRB2;RAC1;TGFB1;VEGFA;RBX1;MET;RAP1A;RAP1B;PIK3R1;CDC42	4.18732	6.39e-06
KEGG_CELL_CYCLE	GADD45B;MDM2;GADD45G;ANAPC5;MYC;SKP1;TGFB1;GADD45A;RBX1;CCND1;YWHAZ;CCND2;YWHAH;YWHAE;SFN;ANAPC11;ANAPC4;YWHAQ;CDKN1C;CDKN1A;CCNA1;CDC26;WEE1;CCNH	3.10531	7.78e-06
KEGG_WNT_SIGNALING_PATHWAY	JUN;SFRP2;SFRP1;ROCK1;MMP7;MYC;SOX17;PRKX;SKP1;RBX1;CSNK2B;CCND1;CACYBP;CCND2;PLCB1;PLCB4;RHOA;MAPK10;RAC2;DKK1;WNT4;RAC1;WNT2;CTNNB1;RUVBL1;PPP2R5A;SFRP4	2.84684	8.74e-06
KEGG_HYPERTROPHIC_CARDIOMYOPATHY_HCM	TNF;IGF1;LMNA;ATP2A2;TPM2;ITGA3;TPM1;ITGA5;ITGB4;ITGB1;TPM4;ACTG1;TPM3;TGFB1;ITGB8;ACTB;ITGA6;DES	3.61503	1.86e-05
KEGG_THYROID_CANCER	PAX8;CCDC6;NCOA4;CTNNB1;CCND1;MAP2K2;MAP2K1;MYC;TPM3;CDH1	6.86042	1.93e-05
KEGG_COLORECTAL_CANCER	JUN;RHOA;MAPK10;RAC2;MAP2K1;RAC1;MYC;CTNNB1;TGFB1;CCND1;BCL2;RALGDS;CYCS;FOS;PIK3R1	4.16429	2.32e-05
KEGG_METABOLISM_OF_XENOBIOTICS_BY_CYTOCHROME_P450	EPHX1;GSTP1;AKR1C3;ADH1B;ADH5;MGST2;MGST1;MGST3;GSTA3;GSTM3;GSTK1;CYP1B1;ALDH1A3;ALDH3B1;UGT2B7;UGT2B17	3.86614	2.68e-05
KEGG_GNRH_SIGNALING_PATHWAY	JUN;CALM2;CALM1;MMP2;PRKX;GNAS;PTK2B;MAP3K2;CDC42;PLCB1;PLCB4;MAPK10;PLA2G2A;MAP2K2;MAP2K3;PLA2G5;MAP2K1;MAP2K6;GRB2;MMP14	3.22411	2.71e-05
KEGG_NATURAL_KILLER_CELL_MEDIATED_CYTOTOXICITY	TNFSF10;FCER1G;ITGB2;FCGR3B;HCST;HLA-E;LCP2;PTK2B;TNF;ICAM1;HLA-C;HLA-B;HLA-A;RAC2;BID;MAP2K2;MAP2K1;TYROBP;GRB2;RAC1;CD48;IFNGR1;TNFRSF10B;PIK3R1	2.77458	3.81e-05
KEGG_OOCYTE_MEIOSIS	CALM2;CALM1;IGF1;ANAPC5;REC8;PRKX;SKP1;RBX1;PGR;YWHAZ;YWHAH;YWHAE;ANAPC11;MAP2K1;PPP1CB;PPP1CA;ANAPC4;YWHAQ;AR;CDC26;PPP2R5A	2.98072	4.65e-05
KEGG_PURINE_METABOLISM	POLR2G;POLR2I;POLR2J;POLR2K;POLR2L;NME1;NME2;NME3;PDE4B;PDE4A;GMPR;NME5;GUCY1A2;GDA;AK7;PNP;RRM2B;PAPSS1;PKM;GUK1;ITPA;POLE4;NT5E;APRT;NME7;NT5C	2.55433	6.26e-05
KEGG_AMYOTROPHIC_LATERAL_SCLEROSIS_ALS	TNF;CAT;MAP3K5;SOD1;BID;MAP2K3;MAP2K6;TNFRSF1B;TNFRSF1A;DAXX;RAC1;BCL2;CYCS	4.23856	6.87e-05
KEGG_GLYCOLYSIS_GLUCONEOGENESIS	PGK1;TPI1;ADH1B;ADH5;ENO1;PKM;ALDH2;AKR1A1;PFKL;GAPDH;LDHB;ALDH1A3;ALDH3B1;LDHA	3.80393	9.68e-05
KEGG_INSULIN_SIGNALING_PATHWAY	CALM2;CALM1;EIF4E;RHEB;PRKX;SOCS3;FOXO1;IRS2;PRKAR1A;PTPN1;SORBS1;SOCS2;MAPK10;MAP2K2;PTPRF;MAP2K1;RAPGEF1;GRB2;PPP1CA;PPP1CB;INSR;RPS6;PIK3R1	2.63485	0.000107306
KEGG_ALDOSTERONE_REGULATED_SODIUM_REABSORPTION	SFN;FXYD2;IGF1;SCNN1A;ATP1B3;ATP1B1;ATP1A1;IRS2;SGK1;INSR;PIK3R1	4.62553	0.000130487
KEGG_DRUG_METABOLISM_CYTOCHROME_P450	GSTP1;ADH1B;ADH5;MGST2;MGST1;MGST3;GSTA3;GSTM3;MAOA;AOX1;GSTK1;ALDH1A3;ALDH3B1;UGT2B7;UGT2B17	3.43268	0.000145979
KEGG_ACUTE_MYELOID_LEUKEMIA	STAT3;ZBTB16;JUP;MAP2K2;MAP2K1;SPI1;GRB2;NFKB1;MYC;CCNA1;CCND1;PIM1;PIK3R1	3.85238	0.000152814
KEGG_PYRIMIDINE_METABOLISM	POLR2G;POLR2I;POLR2J;POLR2K;POLR2L;NME1;NME2;NME3;NME5;CMPK1;RRM2B;PNP;ITPA;POLE4;NT5E;UPP1;NT5C;NME7	2.93615	0.000183645
KEGG_SPHINGOLIPID_METABOLISM	SGMS2;PLPP3;NEU1;UGCG;SPHK1;DEGS1;GLA;PLPP1;ASAH1;PLPP2	4.65439	0.000251459
