# Supplementary material for: Molecular Mechanisms of Endometriosis Revealed Using Omics Data
Source: Biomedicines. 2023 Aug 7;11(8):2210. doi: 10.3390/biomedicines11082210 (PMC10452455; doi:10.3390/biomedicines11082210)
Supplement: Supplementary file 1 [file biomedicines-11-02210-s001.zip › Supplementary Table S13.xlsx]

## Sheet: Sheet1
PMID	Title
20685852	Research resource: genome-wide profiling of methylated promoters in endometriosis reveals a subtelomeric location of hypermethylation.
27535958	Aberrant Endometrial DNA Methylome and Associated Gene Expression in Women with Endometriosis.
30740831	Genome-wide analysis of DNA methylation in endometriosis using Illumina Human Methylation 450 K BeadChips.
35682653	Epigenomic Analysis Reveals the KCNK9 Potassium Channel as a Potential Therapeutic Target for Adenomyosis.
36974156	The Association between Deoxyribonucleic Acid Hypermethylation in Intron VII and Human Leukocyte Antigen-C∗07 Expression in Patients with Endometriosis.
