# Supplementary material for: Molecular Mechanisms of Endometriosis Revealed Using Omics Data
Source: Biomedicines. 2023 Aug 7;11(8):2210. doi: 10.3390/biomedicines11082210 (PMC10452455; doi:10.3390/biomedicines11082210)
Supplement: Supplementary file 1 [file biomedicines-11-02210-s001.zip › Supplementary Table S14.xlsx]

## Sheet: methylation_genes
Differentially methylated genes
HIVEP3
MGAT5B
SLC43A3
PI3
MUC4
AHRR
CANT1
APEH
NEGR1
CST11
AKR1B1
FGG
LTK
HBE1
CLCF1
ELOVL4
C20orf20
MAFB
E2F3
ZNF79
RXRA
RING1
RXRB
HOXD10
HOXD11
BBX
TFDP3
PCGF3
MAFF
ZNF707
HSFX1
ZNF12
TCFL5
ZNF22
ZNF426
CBFA2T3
HOXD12
FZD2
GPR26
ALG13
CLEC11A
HOXA9
HIST1H1A
IRX2
NKX6-2
locus
2
CYP7B1
MSX1
KCNAB1
MYO3A
PTPN20B
CLEC4C
MPP7
TFF3
NPSR1
PLOD3
GIPC1
SULT1A2
IL17B
PLXNB1
IKBKE
SUSD2
CLDN8
LTBR
PLEKHA4
AGPAT2
EDNRB
PRSS8
SERPINB5
CDK5R1
KCNE4
TP53I11
C4orf23
BCOR
APCDD1
DAPK2
SCAND2
COL12A1
SLA
DLG5
PLEK
POU4F2
TCEAL4
CDH22
PAX3
FOXD3
TRH
RERG
CFC1
LAMA3
GDF3
BST2
RASSF1
WT1
HIST1H3J
H2AFY
HOXC11
GATA4
HMOX2
TJP2
CDKN2B
CMTM2
CDH8
NEFM
ALDH1A3
TRIM58
RPF2
ZAR1
HOXC12
LMO2
ZNF541
PRM1
LIMD1
NKX2-4
BRF1
SOX1
HINT1
SP5
FZD7
ZNF23
KCNMB3
KCNK9
KCNA6
TAL1
GSX1
RAX
BACH1
AEBP1
ZNF593
HIST1H1D
KLF11
FHL2
DUSP22
SMAD3
WHSC1
REST
WWTR1
GLI3
CHD8
SIN3A
ATN1
HEYL
GATAD2B
PTCH1
PRDM1
LTBP1
PRICKLE1
MYH10
MRC2
COL6A1
GPNMB
IGFBP3
WNT5A
PPP2R3A
BICC1
POU2F1
KCTD1
LRRFIP1
ZADH2
PAX8
SYF2
HLA-C
KDM5D
LOC284551
PSD3
PDIA6
NUDT1
AJAP1
