# Supplementary material for: Molecular Mechanisms of Endometriosis Revealed Using Omics Data
Source: Biomedicines. 2023 Aug 7;11(8):2210. doi: 10.3390/biomedicines11082210 (PMC10452455; doi:10.3390/biomedicines11082210)
Supplement: Supplementary file 1 [file biomedicines-11-02210-s001.zip › Supplementary Table S15.xlsx]

## Sheet: methyl.genes.gobp.sig.re
GOBP	Gene	OR	P value
GOBP_NEGATIVE_REGULATION_OF_RNA_METABOLIC_PROCESS	TCFL5;PRICKLE1;IRX2;AEBP1;ATN1;EDNRB;FHL2;MAFF;WWTR1;SIN3A;GATA4;HEYL;FOXD3;GLI3;KCTD1;SP5;SMAD3;MSX1;POU2F1;POU4F2;BCOR;DUSP22;BACH1;PTCH1;GATAD2B;CHD8;REST;RING1;RXRA;PRDM1;SOX1;WNT5A;WT1;ZNF12;ZNF79;ZNF541;NKX6-2;KLF11;CBFA2T3;CDK5R1;LIMD1;LRRFIP1;IKBKE;MAFB	10.6619	4.5e-27
GOBP_NEGATIVE_REGULATION_OF_NUCLEOBASE_CONTAINING_COMPOUND_METABOLIC_PROCESS	TCFL5;PRICKLE1;IRX2;AEBP1;ATN1;EDNRB;FHL2;MAFF;WWTR1;SIN3A;GATA4;HEYL;FOXD3;GLI3;KCTD1;SP5;SMAD3;MSX1;POU2F1;POU4F2;BCOR;DUSP22;BACH1;PTCH1;GATAD2B;CHD8;REST;RING1;RXRA;PRDM1;SOX1;WNT5A;WT1;ZNF12;ZNF79;ZNF541;NKX6-2;KLF11;CBFA2T3;CDK5R1;LIMD1;LRRFIP1;IKBKE;MAFB	9.6982	1.63e-25
GOBP_ANIMAL_ORGAN_MORPHOGENESIS	PRICKLE1;APCDD1;IRX2;ALDH1A3;FHL2;FZD2;WWTR1;GATA4;HEYL;GLI3;HOXA9;HOXC11;HOXD10;HOXD11;SP5;LAMA3;SMAD3;MSX1;PAX3;SERPINB5;MYO3A;BCOR;AJAP1;PTCH1;PLEKHA4;RING1;PRDM1;SOX1;WNT5A;WT1;ZNF22;PAX8;FZD7;PLOD3;DLG5;CYP7B1;MAFB	11.5588	1.57e-24
GOBP_NEGATIVE_REGULATION_OF_BIOSYNTHETIC_PROCESS	TCFL5;PRICKLE1;IRX2;AEBP1;ATN1;EDNRB;FHL2;MAFF;WWTR1;SIN3A;GATA4;HEYL;FOXD3;GLI3;KCTD1;SP5;SMAD3;MSX1;PLEK;POU2F1;POU4F2;BCOR;DUSP22;BACH1;PTCH1;GATAD2B;CHD8;REST;RING1;RXRA;PRDM1;SOX1;WNT5A;WT1;ZNF12;ZNF79;ZNF541;NKX6-2;KLF11;CBFA2T3;CDK5R1;LIMD1;LRRFIP1;MAFB	8.76645	7.07e-24
GOBP_TISSUE_DEVELOPMENT	CDKN2B;AGPAT2;COL6A1;COL12A1;PRICKLE1;APCDD1;IRX2;EDNRB;ALDH1A3;FHL2;AKR1B1;MAFF;FZD2;WWTR1;GATA4;HEYL;GLI3;HOXC11;HOXD10;HOXD11;LAMA3;SMAD3;MSX1;SERPINB5;POU4F2;BCOR;PPP2R3A;AJAP1;PTCH1;PLEKHA4;HIVEP3;RXRA;RXRB;PRDM1;WNT5A;WT1;PAX8;FZD7;NKX6-2;PLOD3;DLG5;TJP2;CYP7B1;GDF3;MAFB	7.64129	4.4e-22
GOBP_NEGATIVE_REGULATION_OF_TRANSCRIPTION_BY_RNA_POLYMERASE_II	TCFL5;IRX2;AEBP1;ATN1;EDNRB;FHL2;MAFF;WWTR1;SIN3A;GATA4;HEYL;FOXD3;GLI3;SP5;SMAD3;MSX1;POU4F2;BCOR;DUSP22;BACH1;PTCH1;GATAD2B;CHD8;REST;RXRA;PRDM1;SOX1;WT1;ZNF79;NKX6-2;KLF11;LRRFIP1;MAFB	11.0731	1.07e-21
GOBP_EMBRYO_DEVELOPMENT	COL6A1;COL12A1;PRICKLE1;IRX2;ALDH1A3;MAFF;FZD2;SIN3A;SYF2;GATA4;FOXD3;GLI3;HOXA9;HOXC11;HOXD10;HOXD12;LAMA3;SMAD3;MSX1;MYO3A;BCOR;PPP2R3A;CFC1;PTCH1;CHD8;PRDM1;TAL1;WNT5A;WT1;PAX8;FZD7;CDK5R1;PLOD3;GDF3;MAFB	9.96622	1.99e-21
GOBP_EPITHELIUM_DEVELOPMENT	CDKN2B;PRICKLE1;APCDD1;IRX2;EDNRB;ALDH1A3;AKR1B1;MAFF;FZD2;WWTR1;GATA4;HEYL;GLI3;HOXD11;LAMA3;SMAD3;MSX1;SERPINB5;PPP2R3A;AJAP1;PTCH1;PLEKHA4;PRDM1;WNT5A;WT1;PAX8;FZD7;NKX6-2;PLOD3;DLG5;TJP2;CYP7B1;GDF3;MAFB	8.95683	1.5e-19
GOBP_PATTERN_SPECIFICATION_PROCESS	IRX2;GATA4;HEYL;GLI3;RAX;HOXA9;HOXC11;HOXD10;HOXD11;HOXD12;SMAD3;MSX1;BCOR;CFC1;PTCH1;RING1;SOX1;WNT5A;WT1;PAX8;BICC1;GDF3;MAFB	14.9633	1.41e-18
GOBP_POSITIVE_REGULATION_OF_RNA_METABOLIC_PROCESS	ATN1;E2F3;GSX1;MAFF;FZD2;WWTR1;SIN3A;GATA4;HEYL;FOXD3;GLI3;BRF1;RAX;HOXA9;HOXC11;HOXD10;LMO2;SMAD3;MSX1;PAX3;ZNF593;POU2F1;POU4F2;BACH1;PTCH1;GATAD2B;CHD8;HIVEP3;REST;RXRA;RXRB;SOX1;TAL1;WNT5A;WT1;PAX8;FZD7;MAFB	6.65137	2.22e-17
GOBP_REGULATION_OF_CELL_DIFFERENTIATION	CDKN2B;TCFL5;PRICKLE1;EDNRB;FGG;CLCF1;MAFF;TRIM58;WWTR1;SIN3A;GATA4;HEYL;GLI3;ZADH2;HOXA9;IGFBP3;LTK;SMAD3;MSX1;PLXNB1;POU4F2;AJAP1;PTCH1;GATAD2B;REST;PRDM1;SOX1;TAL1;WNT5A;PAX8;FZD7;NKX6-2;CDK5R1;LIMD1;GDF3;MAFB	6.99472	2.81e-17
GOBP_EMBRYONIC_MORPHOGENESIS	COL6A1;COL12A1;PRICKLE1;IRX2;ALDH1A3;FZD2;SYF2;GATA4;GLI3;HOXA9;HOXC11;HOXD10;HOXD12;LAMA3;SMAD3;MSX1;MYO3A;CFC1;PTCH1;WNT5A;PAX8;FZD7;GDF3;MAFB	11.9006	3.76e-17
GOBP_POSITIVE_REGULATION_OF_MACROMOLECULE_BIOSYNTHETIC_PROCESS	ATN1;E2F3;GSX1;MAFF;FZD2;WWTR1;SIN3A;GATA4;HEYL;FOXD3;GLI3;BRF1;RAX;HOXA9;HOXC11;HOXD10;LMO2;SMAD3;MSX1;PAX3;ZNF593;POU2F1;POU4F2;BACH1;PTCH1;GATAD2B;CHD8;HIVEP3;REST;RXRA;RXRB;SOX1;TAL1;WNT5A;WT1;PAX8;FZD7;MAFB	6.37938	7.94e-17
GOBP_POSITIVE_REGULATION_OF_TRANSCRIPTION_BY_RNA_POLYMERASE_II	E2F3;GSX1;MAFF;WWTR1;SIN3A;GATA4;HEYL;FOXD3;GLI3;RAX;HOXA9;HOXC11;HOXD10;LMO2;SMAD3;MSX1;PAX3;ZNF593;POU2F1;POU4F2;BACH1;CHD8;REST;RXRA;RXRB;SOX1;TAL1;WNT5A;WT1;PAX8;MAFB	7.79918	1.67e-16
GOBP_UROGENITAL_SYSTEM_DEVELOPMENT	IRX2;EDNRB;AKR1B1;WWTR1;HEYL;GLI3;HOXA9;HOXC11;HOXD11;SMAD3;SERPINB5;PTCH1;PRDM1;WNT5A;WT1;PAX8;BICC1;DLG5;CYP7B1	15.8439	3.89e-16
GOBP_REGIONALIZATION	IRX2;GATA4;HEYL;GLI3;HOXA9;HOXC11;HOXD10;HOXD11;SMAD3;MSX1;CFC1;PTCH1;RING1;SOX1;WNT5A;WT1;PAX8;GDF3;MAFB	15.8439	3.89e-16
GOBP_TISSUE_MORPHOGENESIS	PRICKLE1;IRX2;ALDH1A3;FZD2;GATA4;HEYL;GLI3;HOXD11;LAMA3;SMAD3;MSX1;SERPINB5;AJAP1;PTCH1;PLEKHA4;WNT5A;WT1;PAX8;FZD7;PLOD3;DLG5;CYP7B1	10.3328	1.03e-14
GOBP_MORPHOGENESIS_OF_AN_EPITHELIUM	PRICKLE1;IRX2;ALDH1A3;FZD2;GATA4;GLI3;HOXD11;LAMA3;SMAD3;SERPINB5;AJAP1;PTCH1;PLEKHA4;WNT5A;WT1;PAX8;FZD7;PLOD3;DLG5;CYP7B1	11.3142	2.91e-14
GOBP_EMBRYONIC_ORGAN_DEVELOPMENT	ALDH1A3;FZD2;SYF2;GATA4;GLI3;HOXA9;HOXC11;HOXD10;SMAD3;MSX1;MYO3A;PTCH1;PRDM1;TAL1;WNT5A;PAX8;GDF3;MAFB	11.7186	2.85e-13
GOBP_EPITHELIAL_CELL_DIFFERENTIATION	CDKN2B;EDNRB;AKR1B1;MAFF;FZD2;WWTR1;GATA4;SMAD3;AJAP1;PTCH1;PRDM1;WNT5A;WT1;PAX8;FZD7;NKX6-2;PLOD3;DLG5;TJP2;GDF3;MAFB	8.58651	1.13e-12
GOBP_EMBRYO_DEVELOPMENT_ENDING_IN_BIRTH_OR_EGG_HATCHING	PRICKLE1;MAFF;FZD2;SIN3A;SYF2;FOXD3;GLI3;HOXA9;HOXC11;HOXD10;SMAD3;MSX1;BCOR;PTCH1;CHD8;PRDM1;WNT5A;CDK5R1;PLOD3;GDF3	8.6239	3.38e-12
GOBP_REGULATION_OF_ANIMAL_ORGAN_MORPHOGENESIS	PRICKLE1;APCDD1;FZD2;HOXC11;MSX1;AJAP1;PLEKHA4;WNT5A;WT1;PAX8;FZD7	25.307	4.25e-12
GOBP_REGULATION_OF_MULTICELLULAR_ORGANISMAL_DEVELOPMENT	CDKN2B;GPNMB;CLCF1;MAFF;WWTR1;GATA4;HEYL;GLI3;HOXA9;LAMA3;SMAD3;PLXNB1;POU4F2;BCOR;AJAP1;PTCH1;REST;RXRA;RXRB;PRDM1;TAL1;WNT5A;WT1;PAX8;NKX6-2;DLG5;GDF3;MAFB	5.73104	4.35e-12
GOBP_HEART_DEVELOPMENT	PRICKLE1;FHL2;FZD2;GATA4;HEYL;GLI3;SMAD3;MSX1;POU4F2;BCOR;CFC1;PTCH1;REST;PRDM1;WNT5A;WT1;PAX8;BICC1;FZD7	9.12088	4.39e-12
GOBP_ANTERIOR_POSTERIOR_PATTERN_SPECIFICATION	GATA4;HEYL;GLI3;HOXA9;HOXC11;HOXD10;SMAD3;MSX1;CFC1;RING1;WNT5A;WT1;GDF3	17.3917	4.44e-12
GOBP_CELL_FATE_COMMITMENT	GSX1;GATA4;GLI3;HOXD10;PTCH1;GATAD2B;PRDM1;SOX1;TAL1;WNT5A;WT1;FZD7;NKX6-2;GDF3	14.4022	7.72e-12
GOBP_REGULATION_OF_CELL_POPULATION_PROLIFERATION	CDKN2B;GPNMB;TCFL5;E2F3;EDNRB;CLCF1;WWTR1;SYF2;GLI3;IGFBP3;LTK;SMAD3;MSX1;SERPINB5;PLXNB1;DUSP22;PTCH1;REST;CLEC11A;PRDM1;BST2;WNT5A;WT1;FZD7;KLF11;RERG;CBFA2T3;DLG5;CYP7B1;TP53I11	5.09363	1.42e-11
GOBP_OSSIFICATION	COL6A1;FHL2;WWTR1;GLI3;IGFBP3;SMAD3;PLXNB1;BCOR;PTCH1;REST;RXRA;RXRB;CLEC11A;WNT5A;LIMD1;MRC2	10.8338	1.62e-11
GOBP_RESPONSE_TO_ENDOGENOUS_STIMULUS	CDKN2B;GIPC1;COL6A1;CST11;EDNRB;FHL2;SIN3A;GATA4;HEYL;GLI3;LMO2;LTBP1;SMAD3;MSX1;POU4F2;DUSP22;REST;RXRA;RXRB;TRH;WNT5A;WT1;PAX8;KDM5D;KLF11;RERG;CYP7B1;GDF3	5.09549	5.77e-11
GOBP_NEGATIVE_REGULATION_OF_DEVELOPMENTAL_PROCESS	CDKN2B;PRICKLE1;EDNRB;WWTR1;SIN3A;GLI3;ZADH2;HOXA9;SMAD3;MSX1;POU4F2;BCOR;PTCH1;REST;WNT5A;WT1;PAX8;FZD7;NKX6-2;LIMD1;GDF3;MAFB	6.43049	7.44e-11
GOBP_METANEPHROS_DEVELOPMENT	IRX2;AKR1B1;WWTR1;GLI3;HOXC11;PTCH1;WT1;PAX8;DLG5	29.0781	1.14e-10
GOBP_EMBRYONIC_ORGAN_MORPHOGENESIS	ALDH1A3;FZD2;GATA4;GLI3;HOXA9;HOXC11;HOXD10;SMAD3;MSX1;MYO3A;WNT5A;PAX8;MAFB	12.667	1.85e-10
GOBP_MUSCLE_STRUCTURE_DEVELOPMENT	PRICKLE1;EDNRB;FHL2;MAFF;FZD2;GATA4;HEYL;HOXD10;IGFBP3;SMAD3;MSX1;PAX3;HIVEP3;REST;WNT5A;WT1;FZD7;GDF3	7.52064	2.98e-10
GOBP_KIDNEY_EPITHELIUM_DEVELOPMENT	IRX2;EDNRB;WWTR1;HEYL;GLI3;HOXD11;SMAD3;PTCH1;WT1;PAX8	19.8271	3.62e-10
GOBP_APOPTOTIC_PROCESS	ATN1;E2F3;EDNRB;ALDH1A3;FGG;FHL2;AKR1B1;CLCF1;DAPK2;SIN3A;GATA4;GLI3;HINT1;IGFBP3;LTBR;LTK;SMAD3;MSX1;PAX3;POU4F2;CHD8;REST;WNT5A;WT1;PAX8;KLF11;CDK5R1;DLG5;IKBKE	4.4786	4.86e-10
GOBP_REGULATION_OF_CELL_DEATH	GPNMB;E2F3;EDNRB;ALDH1A3;FGG;FHL2;AKR1B1;CLCF1;DAPK2;SIN3A;GATA4;GLI3;HBE1;IGFBP3;LTBR;LTK;SMAD3;MSX1;POU4F2;CHD8;REST;WNT5A;WT1;PAX8;KLF11;CDK5R1;DLG5	4.7383	5.31e-10
GOBP_NEGATIVE_REGULATION_OF_CELL_DIFFERENTIATION	CDKN2B;PRICKLE1;EDNRB;WWTR1;GLI3;ZADH2;HOXA9;SMAD3;MSX1;POU4F2;PTCH1;REST;WNT5A;FZD7;NKX6-2;LIMD1;GDF3;MAFB	7.21224	5.62e-10
GOBP_ANATOMICAL_STRUCTURE_FORMATION_INVOLVED_IN_MORPHOGENESIS	GPNMB;COL6A1;COL12A1;PRICKLE1;IRX2;ALDH1A3;FHL2;FZD2;GATA4;HEYL;GLI3;HOXC11;LAMA3;SMAD3;MSX1;PTCH1;WNT5A;WT1;PAX8;FZD7;CDK5R1;GDF3;MAFB	5.3949	7.7e-10
GOBP_NEPHRON_EPITHELIUM_DEVELOPMENT	IRX2;EDNRB;WWTR1;HEYL;GLI3;HOXD11;PTCH1;WT1;PAX8	22.5274	9.27e-10
GOBP_SENSORY_ORGAN_DEVELOPMENT	ALDH1A3;FZD2;GLI3;RAX;SMAD3;MSX1;MYO3A;POU4F2;RING1;PRDM1;SOX1;WNT5A;WT1;PAX8;GDF3;MAFB	7.9685	1.18e-09
GOBP_POSITIVE_REGULATION_OF_DEVELOPMENTAL_PROCESS	CDKN2B;FGG;CLCF1;WWTR1;SIN3A;GATA4;HEYL;GLI3;HOXC11;IGFBP3;SMAD3;PLXNB1;POU4F2;PTCH1;REST;RXRA;RXRB;TAL1;WNT5A;WT1;PAX8;NKX6-2;DLG5;GDF3	5.0531	1.21e-09
GOBP_CELLULAR_RESPONSE_TO_ENDOGENOUS_STIMULUS	CDKN2B;GIPC1;COL6A1;CST11;SIN3A;GATA4;HEYL;LMO2;LTBP1;SMAD3;MSX1;POU4F2;DUSP22;REST;RXRA;RXRB;TRH;WNT5A;WT1;PAX8;KDM5D;KLF11;CYP7B1;GDF3	5.03397	1.3e-09
GOBP_GLAND_DEVELOPMENT	CDKN2B;GSX1;ALDH1A3;GLI3;HOXA9;SMAD3;MSX1;SERPINB5;PTCH1;WNT5A;WT1;PAX8;CYP7B1;MAFB	8.98332	2.74e-09
GOBP_CANONICAL_WNT_SIGNALING_PATHWAY	PRICKLE1;EDNRB;FZD2;WWTR1;GLI3;SMAD3;PLEKHA4;CHD8;WNT5A;BICC1;FZD7;LIMD1	10.9527	4.23e-09
GOBP_MORPHOGENESIS_OF_A_POLARIZED_EPITHELIUM	PRICKLE1;FZD2;LAMA3;AJAP1;PLEKHA4;WNT5A;FZD7;DLG5	23.6972	5.44e-09
GOBP_RENAL_TUBULE_DEVELOPMENT	IRX2;WWTR1;HEYL;GLI3;HOXD11;PTCH1;WT1;PAX8	23.4369	5.9e-09
GOBP_IN_UTERO_EMBRYONIC_DEVELOPMENT	MAFF;SIN3A;SYF2;FOXD3;GLI3;SMAD3;MSX1;BCOR;PTCH1;CHD8;PRDM1;PLOD3;GDF3	9.29688	6.55e-09
GOBP_CENTRAL_NERVOUS_SYSTEM_DEVELOPMENT	ATN1;GSX1;ALDH1A3;CLCF1;NEGR1;SIN3A;GLI3;RAX;HOXD10;MSX1;PTCH1;CHD8;CDH22;SOX1;WNT5A;PAX8;NKX6-2;CDK5R1;DLG5;MAFB	5.42061	7.65e-09
GOBP_NEUROGENESIS	CDKN2B;APCDD1;IRX2;EDNRB;GSX1;CLCF1;FZD2;NEGR1;SIN3A;HEYL;GLI3;HOXD10;LAMA3;LTK;PLXNB1;POU4F2;PTCH1;REST;PRDM1;SOX1;WNT5A;FZD7;NKX6-2;CDK5R1;DLG5	4.37031	9.31e-09
GOBP_EPITHELIAL_TUBE_MORPHOGENESIS	PRICKLE1;IRX2;FZD2;GATA4;GLI3;HOXD11;SMAD3;PTCH1;WNT5A;WT1;PAX8;DLG5	10.0978	1e-08
GOBP_NEPHRON_DEVELOPMENT	IRX2;EDNRB;WWTR1;HEYL;GLI3;HOXD11;PTCH1;WT1;PAX8	16.7353	1.07e-08
GOBP_SENSORY_ORGAN_MORPHOGENESIS	ALDH1A3;FZD2;GLI3;MSX1;MYO3A;RING1;PRDM1;SOX1;WNT5A;PAX8;MAFB	11.3991	1.22e-08
GOBP_REGULATION_OF_ANATOMICAL_STRUCTURE_MORPHOGENESIS	GPNMB;PRICKLE1;APCDD1;FGG;FZD2;GATA4;HOXC11;MSX1;MYH10;PLXNB1;POU4F2;AJAP1;PLEKHA4;WNT5A;WT1;PAX8;FZD7;CDK5R1;LIMD1	5.49523	1.4e-08
GOBP_NEGATIVE_REGULATION_OF_CELL_POPULATION_PROLIFERATION	CDKN2B;GPNMB;E2F3;GLI3;IGFBP3;SMAD3;MSX1;PLXNB1;PTCH1;REST;WNT5A;WT1;KLF11;RERG;CBFA2T3;DLG5;TP53I11	6.10163	1.71e-08
GOBP_EMBRYONIC_APPENDAGE_MORPHOGENESIS	GLI3;HOXA9;HOXC11;HOXD10;HOXD12;MSX1;PTCH1;WNT5A	19.374	2.37e-08
GOBP_POSITIVE_REGULATION_OF_CELL_DIFFERENTIATION	CDKN2B;FGG;CLCF1;WWTR1;SIN3A;GATA4;HEYL;GLI3;IGFBP3;SMAD3;PLXNB1;POU4F2;PTCH1;REST;TAL1;PAX8;NKX6-2;GDF3	5.58896	2.48e-08
GOBP_TUBE_DEVELOPMENT	GPNMB;PRICKLE1;IRX2;EDNRB;AKR1B1;FZD2;WWTR1;GATA4;HEYL;GLI3;HOXD11;SMAD3;PTCH1;CHD8;PRDM1;WNT5A;WT1;PAX8;PLOD3;DLG5	4.95189	3.19e-08
GOBP_CELL_CELL_SIGNALING_BY_WNT	PRICKLE1;APCDD1;EDNRB;FZD2;WWTR1;GLI3;SMAD3;PLEKHA4;CHD8;WNT5A;BICC1;FZD7;LIMD1	7.96895	3.73e-08
GOBP_APPENDAGE_DEVELOPMENT	GLI3;RAX;HOXA9;HOXC11;HOXD10;HOXD12;MSX1;PTCH1;WNT5A	14.2558	3.98e-08
GOBP_ENDODERM_DEVELOPMENT	COL6A1;COL12A1;GATA4;HOXC11;LAMA3;SMAD3;GDF3	24.4091	4.02e-08
GOBP_CELL_CELL_SIGNALING	CDH8;GPNMB;GIPC1;PRICKLE1;APCDD1;EDNRB;FGG;FZD2;WWTR1;GATA4;IL17B;GLI3;LTBP1;SMAD3;PLEKHA4;CHD8;REST;TRH;WNT5A;PAX8;BICC1;FZD7;CDK5R1;LIMD1	4.13781	4.57e-08
GOBP_NEGATIVE_REGULATION_OF_SIGNALING	PRICKLE1;APCDD1;FGG;FHL2;WWTR1;SIN3A;GATA4;HEYL;GLI3;IGFBP3;LTBP1;PLEK;DUSP22;PTCH1;CHD8;REST;WNT5A;BICC1;LIMD1;DLG5;CYP7B1;GDF3	4.42431	4.94e-08
GOBP_PROSTATE_GLAND_DEVELOPMENT	GLI3;HOXA9;SERPINB5;PTCH1;WNT5A;CYP7B1	35.0983	5.12e-08
GOBP_OSTEOBLAST_DIFFERENTIATION	COL6A1;FHL2;WWTR1;GLI3;IGFBP3;SMAD3;PTCH1;REST;LIMD1;MRC2	11.3952	5.43e-08
GOBP_TRANSMEMBRANE_RECEPTOR_PROTEIN_SERINE_THREONINE_KINASE_SIGNALING_PATHWAY	CDKN2B;GIPC1;WWTR1;SIN3A;GATA4;LTBP1;SMAD3;MSX1;CFC1;DUSP22;WNT5A;GDF3	8.52693	5.93e-08
GOBP_GENERATION_OF_NEURONS	IRX2;EDNRB;GSX1;FZD2;NEGR1;SIN3A;HEYL;GLI3;HOXD10;LAMA3;LTK;PLXNB1;POU4F2;PTCH1;REST;PRDM1;SOX1;WNT5A;FZD7;NKX6-2;CDK5R1;DLG5	4.35082	6.52e-08
GOBP_CIRCULATORY_SYSTEM_DEVELOPMENT	GPNMB;PRICKLE1;FHL2;FZD2;GATA4;HEYL;GLI3;SMAD3;MSX1;POU4F2;BCOR;CFC1;PTCH1;REST;PRDM1;WNT5A;WT1;PAX8;BICC1;FZD7	4.71264	6.88e-08
GOBP_METANEPHRIC_COLLECTING_DUCT_DEVELOPMENT	AKR1B1;PTCH1;PAX8;DLG5	148.606	7.32e-08
GOBP_GASTRULATION	COL6A1;COL12A1;SYF2;LAMA3;SMAD3;CFC1;WNT5A;FZD7;GDF3	12.8732	9.1e-08
GOBP_REGULATION_OF_CANONICAL_WNT_SIGNALING_PATHWAY	PRICKLE1;WWTR1;GLI3;SMAD3;PLEKHA4;CHD8;WNT5A;BICC1;FZD7;LIMD1	10.7549	9.1e-08
GOBP_APPENDAGE_MORPHOGENESIS	GLI3;HOXA9;HOXC11;HOXD10;HOXD12;MSX1;PTCH1;WNT5A	15.8924	1e-07
GOBP_POSITIVE_REGULATION_OF_SIGNALING	CDKN2B;GPNMB;AGPAT2;GIPC1;CANT1;FGG;GATA4;HINT1;IGFBP3;NPSR1;LTBR;SMAD3;MSX1;PLXNB1;DUSP22;PLEKHA4;RXRA;BST2;TRH;WNT5A;FZD7;DLG5;GDF3;IKBKE	3.94418	1.06e-07
GOBP_REGULATION_OF_WNT_SIGNALING_PATHWAY	PRICKLE1;APCDD1;WWTR1;GLI3;SMAD3;PLEKHA4;CHD8;WNT5A;BICC1;FZD7;LIMD1	9.1131	1.07e-07
GOBP_CELL_DIFFERENTIATION_INVOLVED_IN_KIDNEY_DEVELOPMENT	EDNRB;WWTR1;GLI3;PTCH1;WT1;PAX8	30.391	1.13e-07
GOBP_MUSCLE_TISSUE_DEVELOPMENT	FHL2;MAFF;GATA4;HEYL;HOXD10;SMAD3;MSX1;PTCH1;HIVEP3;WNT5A;WT1;FZD7	7.93957	1.24e-07
GOBP_KIDNEY_MORPHOGENESIS	IRX2;WWTR1;GLI3;HOXD11;PTCH1;WT1;PAX8	20.3666	1.27e-07
GOBP_CELL_ADHESION	CDH8;GPNMB;COL6A1;COL12A1;FGG;NEGR1;GLI3;LAMA3;SMAD3;MUC4;MYH10;PLEK;PLXNB1;AJAP1;DUSP22;CDH22;WNT5A;FZD7;CDK5R1;CLDN8;DLG5;TJP2	4.09279	1.77e-07
GOBP_NEGATIVE_REGULATION_OF_MULTICELLULAR_ORGANISMAL_PROCESS	CDKN2B;GPNMB;PRICKLE1;FGG;SIN3A;GLI3;NPSR1;SMAD3;POU4F2;BCOR;PTCH1;REST;BST2;WNT5A;WT1;PAX8;FZD7;NKX6-2;MAFB	4.60942	1.91e-07
GOBP_PROXIMAL_DISTAL_PATTERN_FORMATION	IRX2;GLI3;HOXA9;HOXC11;HOXD10	45.1919	2.2e-07
GOBP_NEGATIVE_REGULATION_OF_RESPONSE_TO_STIMULUS	PRICKLE1;APCDD1;FGG;FHL2;WWTR1;SIN3A;GATA4;HEYL;GLI3;IGFBP3;LTBP1;SMAD3;PLEK;AJAP1;DUSP22;PTCH1;CHD8;WNT5A;BICC1;LIMD1;DLG5;CYP7B1;GDF3	3.87031	2.52e-07
GOBP_CELL_FATE_SPECIFICATION	GLI3;HOXD10;PTCH1;GATAD2B;SOX1;WNT5A;FZD7	18.1685	2.65e-07
GOBP_RESPONSE_TO_HORMONE	CST11;EDNRB;FHL2;HEYL;GLI3;LMO2;POU4F2;REST;RXRA;RXRB;TRH;WT1;PAX8;KDM5D;RERG;CYP7B1	5.21056	3.31e-07
GOBP_COLLECTING_DUCT_DEVELOPMENT	AKR1B1;PTCH1;PAX8;DLG5	86.7115	3.97e-07
GOBP_REPRODUCTIVE_SYSTEM_DEVELOPMENT	ATN1;GATA4;GLI3;HOXA9;NUDT1;SERPINB5;PTCH1;WNT5A;WT1;CYP7B1	8.95139	4.6e-07
GOBP_VENTRICULAR_SEPTUM_DEVELOPMENT	FZD2;GATA4;HEYL;PRDM1;WNT5A;PAX8	23.2465	4.89e-07
GOBP_NEGATIVE_REGULATION_OF_WNT_SIGNALING_PATHWAY	PRICKLE1;APCDD1;WWTR1;GLI3;CHD8;WNT5A;BICC1;LIMD1	12.7401	4.97e-07
GOBP_SENSORY_SYSTEM_DEVELOPMENT	ALDH1A3;GLI3;RAX;SMAD3;POU4F2;RING1;PRDM1;SOX1;WNT5A;WT1;GDF3	7.66604	5.6e-07
GOBP_CELL_SURFACE_RECEPTOR_SIGNALING_PATHWAY_INVOLVED_IN_CELL_CELL_SIGNALING	PRICKLE1;APCDD1;EDNRB;FZD2;WWTR1;GLI3;SMAD3;PLEKHA4;CHD8;WNT5A;BICC1;FZD7;LIMD1	6.21423	5.75e-07
GOBP_EAR_MORPHOGENESIS	ALDH1A3;FZD2;MSX1;MYO3A;WNT5A;PAX8;MAFB	15.8343	6.37e-07
GOBP_REGULATION_OF_CELL_FATE_COMMITMENT	GATAD2B;WNT5A;FZD7;NKX6-2;GDF3	35.3688	6.55e-07
GOBP_IMMUNE_SYSTEM_DEVELOPMENT	CDKN2B;CLCF1;TRIM58;SIN3A;GLI3;HOXA9;LTBR;SMAD3;PLEK;POU4F2;REST;PRDM1;TAL1;WNT5A;FZD7;CBFA2T3;MAFB	4.65474	6.73e-07
GOBP_NEGATIVE_REGULATION_OF_CELL_DEATH	GPNMB;EDNRB;FGG;FHL2;AKR1B1;CLCF1;SIN3A;GATA4;GLI3;LTK;SMAD3;MSX1;CHD8;REST;WNT5A;WT1;PAX8	4.6406	7.01e-07
GOBP_NEPHRON_MORPHOGENESIS	IRX2;GLI3;HOXD11;PTCH1;WT1;PAX8	21.3419	7.78e-07
GOBP_POSITIVE_REGULATION_OF_MULTICELLULAR_ORGANISMAL_PROCESS	AGPAT2;EDNRB;FGG;CLCF1;WWTR1;SIN3A;GATA4;IL17B;GLI3;HOXC11;SMAD3;PLXNB1;POU4F2;REST;RXRA;RXRB;WNT5A;WT1;PAX8;NKX6-2;DLG5	3.83863	8.54e-07
GOBP_HEAD_DEVELOPMENT	GSX1;ALDH1A3;NEGR1;SIN3A;GLI3;RAX;MSX1;PTCH1;CHD8;CDH22;SOX1;WNT5A;CDK5R1;DLG5;MAFB	5.14446	8.58e-07
GOBP_CELL_JUNCTION_ORGANIZATION	CDH8;MPP7;NEGR1;LAMA3;SMAD3;PLXNB1;DUSP22;REST;CDH22;WNT5A;CDK5R1;CLDN8;DLG5;TJP2	5.51483	8.73e-07
GOBP_RESPONSE_TO_ORGANIC_CYCLIC_COMPOUND	CDKN2B;CST11;EDNRB;SIN3A;HEYL;HBE1;HOXA9;SP5;POU4F2;PTCH1;REST;RXRA;RXRB;WT1;KDM5D;CYP7B1	4.82143	8.84e-07
GOBP_CELLULAR_RESPONSE_TO_LIPID	CST11;EDNRB;HEYL;LTK;POU4F2;PTCH1;REST;RXRA;RXRB;WNT5A;KDM5D;FZD7;CYP7B1	5.94923	9.18e-07
GOBP_HORMONE_MEDIATED_SIGNALING_PATHWAY	CST11;HEYL;POU4F2;RXRA;RXRB;TRH;KDM5D;CYP7B1	11.5611	1e-06
GOBP_POSITIVE_REGULATION_OF_CELL_DEATH	E2F3;ALDH1A3;DAPK2;HBE1;IGFBP3;LTBR;LTK;MSX1;POU4F2;REST;WNT5A;KLF11;CDK5R1	5.87898	1.04e-06
GOBP_REGULATION_OF_CELL_DEVELOPMENT	CDKN2B;EDNRB;FGG;CLCF1;TRIM58;HEYL;GLI3;PLXNB1;POU4F2;REST;WNT5A;NKX6-2	6.44457	1.04e-06
GOBP_REGULATION_OF_NEURON_DIFFERENTIATION	EDNRB;SIN3A;HEYL;GLI3;LTK;POU4F2;REST;CDK5R1	11.3142	1.17e-06
GOBP_STEROID_HORMONE_MEDIATED_SIGNALING_PATHWAY	CST11;HEYL;POU4F2;RXRA;RXRB;KDM5D;CYP7B1	14.3597	1.19e-06
GOBP_TAXIS	GPNMB;CMTM2;EDNRB;DAPK2;GLI3;LAMA3;SMAD3;PLXNB1;POU4F2;PTCH1;WNT5A;CDK5R1;CYP7B1	5.80067	1.2e-06
GOBP_CELL_JUNCTION_ASSEMBLY	CDH8;MPP7;NEGR1;LAMA3;SMAD3;PLXNB1;DUSP22;CDH22;WNT5A;CLDN8;DLG5	7.05659	1.22e-06
GOBP_MUSCLE_ORGAN_DEVELOPMENT	MAFF;FZD2;HEYL;HOXD10;SMAD3;MSX1;PAX3;HIVEP3;WNT5A;WT1	7.96182	1.28e-06
GOBP_NEGATIVE_REGULATION_OF_CANONICAL_WNT_SIGNALING_PATHWAY	PRICKLE1;WWTR1;GLI3;CHD8;WNT5A;BICC1;LIMD1	13.824	1.51e-06
GOBP_MORPHOGENESIS_OF_A_BRANCHING_STRUCTURE	GLI3;HOXD11;PTCH1;PRDM1;WNT5A;WT1;PAX8;DLG5	10.9077	1.52e-06
GOBP_CELL_DIFFERENTIATION_IN_SPINAL_CORD	GSX1;GLI3;HOXD10;PTCH1;SOX1	29.0954	1.59e-06
GOBP_SKELETAL_SYSTEM_DEVELOPMENT	GLI3;HOXA9;HOXC11;HOXD10;HOXD12;SP5;SMAD3;MSX1;PLXNB1;BBX;WNT5A;GDF3	6.16001	1.64e-06
GOBP_DIGESTIVE_SYSTEM_DEVELOPMENT	EDNRB;GATA4;GLI3;SMAD3;CHD8;PRDM1;WNT5A	13.6209	1.66e-06
GOBP_REGULATION_OF_INTRACELLULAR_SIGNAL_TRANSDUCTION	GPNMB;CANT1;FGG;FHL2;PSD3;DAPK2;GATA4;HINT1;IGFBP3;NPSR1;LTBR;MSX1;PLEK;PLXNB1;DUSP22;BST2;WNT5A;FZD7;RPF2;LIMD1;DLG5;IKBKE	3.54693	1.7e-06
GOBP_CELLULAR_RESPONSE_TO_STEROID_HORMONE_STIMULUS	CST11;HEYL;POU4F2;REST;RXRA;RXRB;KDM5D;CYP7B1	10.5806	1.89e-06
GOBP_REPRODUCTION	TCFL5;ATN1;EDNRB;MAFF;GATA4;GLI3;HOXA9;HOXD10;MSX1;NUDT1;PI3;SERPINB5;POU4F2;PRM1;PTCH1;PRDM1;WNT5A;WT1;ZNF541;CYP7B1	3.76889	1.93e-06
GOBP_REGULATION_OF_TRANSMEMBRANE_RECEPTOR_PROTEIN_SERINE_THREONINE_KINASE_SIGNALING_PATHWAY	CDKN2B;GIPC1;SIN3A;GATA4;LTBP1;SMAD3;MSX1;WNT5A;GDF3	8.48926	2.54e-06
GOBP_MORPHOGENESIS_OF_EMBRYONIC_EPITHELIUM	PRICKLE1;IRX2;ALDH1A3;FZD2;PTCH1;WNT5A;PAX8	12.6789	2.61e-06
GOBP_POSITIVE_REGULATION_OF_INTRACELLULAR_SIGNAL_TRANSDUCTION	GPNMB;CANT1;FGG;GATA4;HINT1;IGFBP3;NPSR1;LTBR;MSX1;PLXNB1;DUSP22;BST2;WNT5A;FZD7;DLG5;IKBKE	4.40587	2.69e-06
GOBP_ENZYME_LINKED_RECEPTOR_PROTEIN_SIGNALING_PATHWAY	CDKN2B;GIPC1;WWTR1;SIN3A;GATA4;IGFBP3;LTBP1;LTK;SMAD3;MSX1;CFC1;DUSP22;SLA;WNT5A;CDK5R1;GDF3	4.39247	2.79e-06
GOBP_EMBRYONIC_DIGIT_MORPHOGENESIS	GLI3;HOXC11;HOXD12;MSX1;WNT5A	25.6777	2.81e-06
GOBP_EAR_DEVELOPMENT	ALDH1A3;FZD2;GLI3;MSX1;MYO3A;WNT5A;PAX8;MAFB	9.9801	2.86e-06
GOBP_CELL_MORPHOGENESIS	CDH8;FGG;SIN3A;GLI3;LAMA3;MSX1;MYH10;PLXNB1;POU4F2;PTCH1;CDH22;WNT5A;FZD7;CDK5R1;PLOD3;LIMD1	4.37935	2.9e-06
GOBP_REGULATION_OF_ESTABLISHMENT_OF_PLANAR_POLARITY	PRICKLE1;FZD2;PLEKHA4;WNT5A;FZD7	25.1833	3.08e-06
GOBP_BRANCHING_MORPHOGENESIS_OF_AN_EPITHELIAL_TUBE	GLI3;HOXD11;PTCH1;WNT5A;WT1;PAX8;DLG5	12.3419	3.09e-06
GOBP_MESONEPHROS_DEVELOPMENT	GLI3;HOXD11;SMAD3;PTCH1;WT1;PAX8	16.4534	3.25e-06
GOBP_INNER_EAR_MORPHOGENESIS	ALDH1A3;FZD2;MYO3A;WNT5A;PAX8;MAFB	16.2776	3.44e-06
GOBP_CELLULAR_RESPONSE_TO_ORGANIC_CYCLIC_COMPOUND	CST11;SIN3A;HEYL;SP5;POU4F2;PTCH1;REST;RXRA;RXRB;WT1;KDM5D;CYP7B1	5.70993	3.47e-06
GOBP_RESPONSE_TO_LIPID	CST11;EDNRB;GATA4;HEYL;HOXA9;LTK;POU4F2;PTCH1;REST;RXRA;RXRB;WNT5A;KDM5D;FZD7;CYP7B1	4.54619	3.68e-06
GOBP_NEGATIVE_REGULATION_OF_MOLECULAR_FUNCTION	CDKN2B;CST11;EDNRB;KCNE4;WWTR1;SIN3A;HEYL;MSX1;ZNF593;TFDP3;PI3;SERPINB5;POU4F2;DUSP22;PTCH1;BST2;KCNAB1	4.05583	3.98e-06
GOBP_GROWTH	ATN1;WWTR1;SIN3A;GATA4;GLI3;IGFBP3;SMAD3;MSX1;POU4F2;PTCH1;BST2;WNT5A;WT1;FZD7;RERG	4.51508	3.98e-06
GOBP_SEGMENTATION	IRX2;SMAD3;WNT5A;WT1;GDF3;MAFB	15.7884	4.06e-06
GOBP_REGULATION_OF_EPITHELIAL_CELL_DIFFERENTIATION	CDKN2B;MAFF;WWTR1;AJAP1;PTCH1;PAX8;GDF3	11.7898	4.13e-06
GOBP_CARDIAC_SEPTUM_DEVELOPMENT	FZD2;GATA4;HEYL;PRDM1;WNT5A;PAX8	15.6319	4.29e-06
GOBP_RESPONSE_TO_RETINOIC_ACID	LTK;PTCH1;RXRA;RXRB;WNT5A;FZD7	15.4784	4.53e-06
GOBP_MESENCHYME_DEVELOPMENT	EDNRB;WWTR1;GATA4;HEYL;SMAD3;MSX1;WNT5A;WT1;DLG5	7.87389	4.58e-06
GOBP_CARDIAC_CHAMBER_DEVELOPMENT	FHL2;FZD2;GATA4;HEYL;PRDM1;WNT5A;PAX8	11.568	4.65e-06
GOBP_CELLULAR_RESPONSE_TO_HORMONE_STIMULUS	CST11;HEYL;LMO2;POU4F2;REST;RXRA;RXRB;TRH;WT1;PAX8;KDM5D;CYP7B1	5.54246	4.65e-06
GOBP_DEVELOPMENTAL_PROCESS_INVOLVED_IN_REPRODUCTION	TCFL5;ATN1;GATA4;GLI3;HOXA9;NUDT1;SERPINB5;POU4F2;PRM1;PTCH1;PRDM1;WNT5A;WT1;ZNF541;CYP7B1	4.3438	6.2e-06
